# Supplementary material
Source: PubMed Central journal article supplement (PMC2668410)
Supplement: supp_191_8_2461__1.pdf [file supp_191_8_2461__1.pdf]

Table S1. The *L. pneumophila rpoS* mutant microarray data set

| ORF            | Product                                                                  | Gene         | Category                                 | Spot Intensity <sup>†</sup> (JR32, E Phase) | Spot Intensity <sup>†</sup> (rpoS, E Phase) | Spot Intensity <sup>†</sup> (JR32, PE Phase) | Spot Intensity <sup>†</sup> (rpoS, PE Phase) | T-Test (rpoS, JR32) E | T-Test (rpoS, JR32) PE | Ratio* (rpoS E/ JR32 E) | Ratio* (rpoS PE/ JR32 PE) |
|----------------|--------------------------------------------------------------------------|--------------|------------------------------------------|---------------------------------------------|---------------------------------------------|----------------------------------------------|----------------------------------------------|-----------------------|------------------------|-------------------------|---------------------------|
| <i>lpg0001</i> | chromosomal replication initiator protein DnaA                           | <i>dnaA</i>  | Replication and Repair                   | 13.046                                      | 13.044                                      | 11.044                                       | 13.675                                       | 9.96E-01              | 4.57E-04               | 0.00                    | 2.63                      |
| <i>lpg0001</i> | chromosomal replication initiator protein DnaA                           | <i>dnaA</i>  | Replication and Repair                   | 12.614                                      | 12.683                                      | 10.242                                       | 12.991                                       | 9.40E-01              | 1.95E-02               | 0.07                    | 2.75                      |
| <i>lpg0002</i> | DNA polymerase III beta chain                                            |              | Nucleotide Metabolism, Replication an    | 12.613                                      | 12.219                                      | 11.063                                       | 12.781                                       | 5.50E-01              | 2.67E-03               | -0.39                   | 1.72                      |
| <i>lpg0002</i> | DNA polymerase III beta chain                                            |              | Nucleotide Metabolism, Replication an    | 12.707                                      | 12.053                                      | 10.802                                       | 12.784                                       | 2.95E-01              | 2.40E-03               | -0.65                   | 1.98                      |
| <i>lpg0003</i> | DNA recombination and repair protein ATPase RecF                         |              | Replication and Repair                   | 11.267                                      | 9.069                                       | 9.617                                        | 8.747                                        | 1.17E-04              | 2.44E-01               | -2.20                   | -0.87                     |
| <i>lpg0003</i> | DNA recombination and repair protein ATPase RecF                         |              | Replication and Repair                   | 11.153                                      | 8.917                                       | 9.329                                        | 9.258                                        | 2.37E-02              | 9.30E-01               | -2.24                   | -0.07                     |
| <i>lpg0004</i> | DNA gyrase subunit B                                                     | <i>gyrB</i>  | Replication and Repair                   | 11.975                                      | 11.747                                      | 11.717                                       | 12.141                                       | 2.41E-01              | 7.86E-02               | -0.23                   | 0.42                      |
| <i>lpg0004</i> | DNA gyrase subunit B                                                     | <i>gyrB</i>  | Replication and Repair                   | 11.877                                      | 11.617                                      | 11.530                                       | 12.083                                       | 4.56E-01              | 1.41E-02               | -0.26                   | 0.55                      |
| <i>lpg0005</i> | peptidylarginine deiminase                                               |              | Named proteins of general function       | 11.591                                      | 9.941                                       | 10.869                                       | 10.871                                       | 3.40E-04              | 9.97E-01               | -1.65                   | 0.00                      |
| <i>lpg0005</i> | peptidylarginine deiminase                                               |              | Named proteins of general function       | 11.500                                      | 9.392                                       | 10.427                                       | 11.081                                       | 3.35E-03              | 1.40E-01               | -2.11                   | 0.65                      |
| <i>lpg0006</i> | biosynthetic arginine decarboxylase                                      | <i>speA</i>  | Amino Acid Metabolism                    | 9.700                                       | 10.066                                      | 8.450                                        | 10.752                                       | 6.52E-01              | 1.91E-02               | 0.37                    | 2.30                      |
| <i>lpg0006</i> | biosynthetic arginine decarboxylase                                      | <i>speA</i>  | Amino Acid Metabolism                    | 10.149                                      | 10.026                                      | 8.201                                        | 10.988                                       | 7.13E-01              | 2.19E-03               | -0.12                   | 2.79                      |
| <i>lpg0007</i> | probable hydrolase (carbon-nitrogen hydrolase, beta-alanine synthetase)  |              | Named proteins of general function       | 11.774                                      | 12.125                                      | 11.234                                       | 11.844                                       | 6.29E-01              | 3.08E-01               | 0.35                    | 0.61                      |
| <i>lpg0007</i> | probable hydrolase (carbon-nitrogen hydrolase, beta-alanine synthetase)  |              | Named proteins of general function       | 11.161                                      | 11.915                                      | 10.643                                       | 11.815                                       | 5.59E-03              | 5.62E-05               | 0.75                    | 1.17                      |
| <i>lpg0008</i> | ORF                                                                      |              | ORFs of unknown function (unique)        | 11.857                                      | 12.578                                      | 10.727                                       | 11.764                                       | 2.75E-01              | 5.75E-02               | 0.72                    | 1.04                      |
| <i>lpg0008</i> | ORF                                                                      |              | ORFs of unknown function (unique)        | 11.981                                      | 12.630                                      | 10.757                                       | 11.903                                       | 2.70E-01              | 2.90E-02               | 0.65                    | 1.15                      |
| <i>lpg0009</i> | host factor-I protein for bacteriophage Q beta replication               | <i>hfq</i>   | Signal transduction / other regulatory f | 9.205                                       | 10.762                                      | 11.302                                       | 9.932                                        | 8.38E-02              | 3.22E-01               | 1.56                    | -1.37                     |
| <i>lpg0009</i> | host factor-I protein for bacteriophage Q beta replication               | <i>hfq</i>   | Signal transduction / other regulatory f | 9.530                                       | 10.766                                      | 11.410                                       | 10.111                                       | 1.10E-01              | 3.53E-01               | 1.24                    | -1.30                     |
| <i>lpg0010</i> | GTP binding protein HflX (GTPase)                                        |              | Signal transduction / other regulatory f | 11.363                                      | 10.233                                      | 11.677                                       | 11.489                                       | 1.32E-02              | 3.75E-01               | -1.13                   | -0.19                     |
| <i>lpg0010</i> | GTP binding protein HflX (GTPase)                                        |              | Signal transduction / other regulatory f | 11.323                                      | 10.640                                      | 11.766                                       | 11.656                                       | 5.07E-03              | 6.54E-01               | -0.68                   | -0.11                     |
| <i>lpg0011</i> | thiol-disulfide oxidoreductase ResA (thioredoxin) (cytochr <i>resA</i> ) |              | Energy Metabolism                        | 11.797                                      | 13.490                                      | 11.900                                       | 12.967                                       | 2.85E-05              | 4.51E-04               | 1.69                    | 1.07                      |
| <i>lpg0011</i> | thiol-disulfide oxidoreductase ResA (thioredoxin) (cytochr <i>resA</i> ) |              | Energy Metabolism                        | 11.732                                      | 13.493                                      | 11.723                                       | 13.006                                       | 8.38E-06              | 5.09E-05               | 1.76                    | 1.28                      |
| <i>lpg0012</i> | ORF                                                                      | <i>cegC1</i> | ORFs of unknown function (unique)        | 9.908                                       | 10.023                                      | 11.585                                       | 10.141                                       | 7.85E-01              | 9.99E-04               | 0.12                    | -1.44                     |
| <i>lpg0012</i> | ORF                                                                      | <i>cegC1</i> | ORFs of unknown function (unique)        | 10.057                                      | 11.023                                      | 11.669                                       | 10.789                                       | 1.65E-01              | 1.54E-01               | 0.97                    | -0.88                     |
| <i>lpg0013</i> | pirin (metal binding transcription factor or enzyme?)                    |              | Transcription factors / DNA binding prc  | 9.763                                       | 9.512                                       | 13.037                                       | 9.226                                        | 8.26E-01              | 5.56E-03               | -0.25                   | -3.81                     |
| <i>lpg0013</i> | pirin (metal binding transcription factor or enzyme?)                    |              | Transcription factors / DNA binding prc  | 10.060                                      | 9.447                                       | 13.084                                       | 9.906                                        | 5.81E-01              | 4.00E-02               | -0.61                   | -3.18                     |
| <i>lpg0014</i> | transmembrane protein                                                    |              | Unknown / hypothetical proteins          | 9.925                                       | 9.853                                       | 9.880                                        | 9.165                                        | 9.14E-01              | 6.33E-01               | -0.07                   | -0.72                     |
| <i>lpg0014</i> | transmembrane protein                                                    |              | Unknown / hypothetical proteins          | 10.044                                      | 8.930                                       | 9.979                                        | 9.473                                        | 1.94E-01              | 6.85E-01               | -1.11                   | -0.51                     |
| <i>lpg0015</i> | multidrug resistance protein (efflux pump protein FarA)                  |              | Transport and binding                    | 8.555                                       | 9.125                                       | 9.137                                        | 7.225                                        | 6.26E-01              | 2.94E-01               | 0.57                    | -1.91                     |
| <i>lpg0015</i> | multidrug resistance protein (efflux pump protein FarA)                  |              | Transport and binding                    | 8.604                                       | 8.187                                       | 9.314                                        | 8.567                                        | 4.84E-01              | 1.64E-01               | -0.42                   | -0.75                     |
| <i>lpg0016</i> | ORF                                                                      |              | ORFs of unknown function (unique)        | 9.995                                       | 9.621                                       | 10.903                                       | 9.172                                        | 4.93E-01              | 3.09E-02               | -0.37                   | -1.73                     |
| <i>lpg0016</i> | ORF                                                                      |              | ORFs of unknown function (unique)        | 9.966                                       | 9.264                                       | 10.546                                       | 9.015                                        | 1.21E-01              | 3.82E-02               | -0.70                   | -1.53                     |
| <i>lpg0017</i> | ORF                                                                      |              | ORFs of unknown function (unique)        | 8.842                                       | 9.002                                       | 9.507                                        | 8.177                                        | 8.49E-01              | 6.11E-02               | 0.16                    | -1.33                     |
| <i>lpg0017</i> | ORF                                                                      |              | ORFs of unknown function (unique)        | 9.214                                       | 9.403                                       | 9.514                                        | 8.429                                        | 7.79E-01              | 1.43E-01               | 0.19                    | -1.09                     |
| <i>lpg0018</i> | outer membrane efflux (channel) protein                                  |              | Transport and binding                    | 9.312                                       | 9.026                                       | 10.602                                       | 9.213                                        | 4.96E-01              | 1.32E-03               | -0.29                   | -1.39                     |
| <i>lpg0018</i> | outer membrane efflux (channel) protein                                  |              | Transport and binding                    | 8.919                                       | 10.346                                      | 10.309                                       | 10.127                                       | 1.50E-01              | 7.79E-01               | 1.43                    | -0.18                     |
| <i>lpg0019</i> | hemagglutinin/protease, zinc metalloprotease                             |              | Toxin production / other pathogen func   | 9.985                                       | 11.592                                      | 10.604                                       | 9.474                                        | 2.31E-05              | 2.36E-02               | 1.61                    | -1.13                     |
| <i>lpg0019</i> | hemagglutinin/protease, zinc metalloprotease                             |              | Toxin production / other pathogen func   | 9.777                                       | 11.294                                      | 10.541                                       | 9.950                                        | 3.75E-04              | 5.06E-02               | 1.52                    | -0.59                     |
| <i>lpg0020</i> | integral membrane protein                                                |              | Named proteins of general function       | 10.822                                      | 10.086                                      | 10.506                                       | 9.706                                        | 2.04E-01              | 1.33E-01               | -0.74                   | -0.80                     |
| <i>lpg0020</i> | integral membrane protein                                                |              | Named proteins of general function       | 10.808                                      | 9.660                                       | 10.203                                       | 10.008                                       | 7.40E-02              | 6.52E-01               | -1.15                   | -0.20                     |
| <i>lpg0021</i> | alpha helix protein                                                      |              | Unknown / hypothetical proteins          | 10.758                                      | 9.143                                       | 10.037                                       | 8.550                                        | 2.70E-04              | 1.77E-01               | -1.62                   | -1.49                     |
| <i>lpg0021</i> | alpha helix protein                                                      |              | Unknown / hypothetical proteins          | 10.569                                      | 9.258                                       | 10.095                                       | 9.935                                        | 4.50E-02              | 5.25E-01               | -1.31                   | -0.16                     |
| <i>lpg0022</i> | conserved hypothetical protein (oxidoreductase, N6-adenine specific)     |              | Nucleotide Metabolism                    | 10.223                                      | 10.270                                      | 10.406                                       | 10.952                                       | 9.37E-01              | 4.35E-01               | 0.05                    | 0.55                      |
| <i>lpg0022</i> | conserved hypothetical protein (oxidoreductase, N6-adenine specific)     |              | Nucleotide Metabolism                    | 10.219                                      | 10.657                                      | 10.475                                       | 11.425                                       | 1.61E-01              | 6.35E-03               | 0.44                    | 0.95                      |
| <i>lpg0023</i> | transmembrane protein COG4539                                            |              | Unknown / hypothetical proteins          | 11.570                                      | 11.344                                      | 14.051                                       | 10.110                                       | 7.57E-01              | 9.74E-05               | -0.23                   | -3.94                     |
| <i>lpg0023</i> | transmembrane protein COG4539                                            |              | Unknown / hypothetical proteins          | 11.561                                      | 11.734                                      | 14.098                                       | 10.367                                       | 8.42E-01              | 1.18E-03               | 0.17                    | -3.73                     |
| <i>lpg0024</i> | hemin binding protein Hbp (Legionella pneumophila)                       |              | Toxin production / other pathogen func   | 9.416                                       | 10.792                                      | 8.553                                        | 9.690                                        | 4.18E-02              | 6.64E-02               | 1.38                    | 1.14                      |
| <i>lpg0024</i> | hemin binding protein Hbp (Legionella pneumophila)                       |              | Toxin production / other pathogen func   | 8.803                                       | 11.306                                      | 8.552                                        | 10.115                                       | 4.90E-02              | 5.69E-04               | 2.50                    | 1.56                      |
| <i>lpg0025</i> | Rcp (PagP like gene conferring resistance to cationic antimicrobial pe   |              | Toxin production / other pathogen func   | 9.708                                       | 10.009                                      | 9.377                                        | 9.286                                        | 4.16E-01              | 9.02E-01               | 0.30                    | -0.09                     |
| <i>lpg0025</i> | Rcp (PagP like gene conferring resistance to cationic antimicrobial pe   |              | Toxin production / other pathogen func   | 9.245                                       | 8.882                                       | 8.922                                        | 9.821                                        | 7.45E-01              | 2.89E-01               | -0.36                   | 0.90                      |
| <i>lpg0026</i> | amino acid permease COG0531                                              |              | Transport and binding                    | 10.113                                      | 11.885                                      | 11.264                                       | 10.132                                       | 6.79E-03              | 1.46E-01               | 1.77                    | -1.13                     |
| <i>lpg0026</i> | amino acid permease COG0531                                              |              | Transport and binding                    | 10.043                                      | 12.087                                      | 11.239                                       | 10.154                                       | 4.83E-03              | 1.44E-01               | 2.04                    | -1.08                     |
| <i>lpg0027</i> | low affinity inorganic phosphate transporter                             | <i>pit</i>   | Transport and binding                    | 10.908                                      | 9.455                                       | 10.527                                       | 10.202                                       | 5.85E-02              | 3.96E-01               | -1.45                   | -0.33                     |
| <i>lpg0027</i> | low affinity inorganic phosphate transporter                             | <i>pit</i>   | Transport and binding                    | 10.122                                      | 11.397                                      | 9.283                                        | 11.436                                       | 1.85E-01              | 2.00E-02               | 1.27                    | 2.15                      |
| <i>lpg0028</i> | ubiquinone biosynthesis protein COQ7, central metabolic regulatory p     |              | Energy Metabolism                        | 10.685                                      | 10.062                                      | 9.094                                        | 10.105                                       | 2.69E-01              | 3.16E-01               | -0.62                   | 1.01                      |
| <i>lpg0028</i> | ubiquinone biosynthesis protein COQ7, central metabolic regulatory p     |              | Energy Metabolism                        | 10.925                                      | 10.324                                      | 8.462                                        | 11.159                                       | 1.98E-01              | 1.64E-03               | -0.60                   | 2.70                      |
| <i>lpg0029</i> | sensory box (GGDEF/EAL domain) regulatory protein (ni <i>rre41</i> )     |              | Signal transduction / other regulatory f | 8.039                                       | 8.921                                       | 9.887                                        | 9.354                                        | 1.60E-01              | 4.59E-01               | 0.88                    | -0.53                     |
| <i>lpg0029</i> | sensory box (GGDEF/EAL domain) regulatory protein (ni <i>rre41</i> )     |              | Signal transduction / other regulatory f | 8.344                                       | 10.458                                      | 10.154                                       | 9.932                                        | 9.59E-03              | 7.25E-01               | 2.11                    | -0.22                     |

|                |                                                                          |                                         |        |        |        |        |          |          |       |       |
|----------------|--------------------------------------------------------------------------|-----------------------------------------|--------|--------|--------|--------|----------|----------|-------|-------|
| <i>lpg0030</i> | ORF                                                                      | ORFs of unknown function (unique)       | 9.947  | 10.979 | 10.396 | 11.527 | 1.50E-03 | 1.49E-03 | 1.03  | 1.13  |
| <i>lpg0030</i> | ORF                                                                      | ORFs of unknown function (unique)       | 9.846  | 11.046 | 9.649  | 11.499 | 3.31E-04 | 1.69E-04 | 1.20  | 1.85  |
| <i>lpg0031</i> | ORF                                                                      | ORFs of unknown function (unique)       | 10.050 | 11.301 | 11.545 | 11.659 | 2.15E-01 | 9.15E-01 | 1.25  | 0.11  |
| <i>lpg0031</i> | ORF                                                                      | ORFs of unknown function (unique)       | 11.987 | 13.435 | 13.220 | 13.794 | 7.51E-03 | 4.50E-01 | 1.45  | 0.57  |
| <i>lpg0032</i> | leucine aminopeptidase                                                   | Protein fate / hydrolases / secretion   | 9.673  | 10.758 | 9.056  | 10.650 | 6.51E-02 | 1.84E-04 | 1.08  | 1.59  |
| <i>lpg0032</i> | leucine aminopeptidase                                                   | Protein fate / hydrolases / secretion   | 9.674  | 10.688 | 8.532  | 10.972 | 1.06E-01 | 5.46E-03 | 1.01  | 2.44  |
| <i>lpg0033</i> | ORF                                                                      | ORFs of unknown function (unique)       | 10.288 | 11.486 | 10.172 | 10.456 | 7.78E-03 | 3.43E-01 | 1.20  | 0.28  |
| <i>lpg0033</i> | ORF                                                                      | ORFs of unknown function (unique)       | 10.275 | 11.288 | 9.930  | 10.395 | 4.66E-02 | 2.29E-01 | 1.01  | 0.46  |
| <i>lpg0034</i> | unknown protein                                                          | Unknown / hypothetical proteins         | 10.230 | 8.921  | 11.810 | 9.871  | 1.28E-02 | 2.31E-03 | -1.31 | -1.94 |
| <i>lpg0034</i> | unknown protein                                                          | Unknown / hypothetical proteins         | 10.257 | 9.499  | 11.734 | 10.249 | 4.35E-02 | 1.25E-05 | -0.76 | -1.49 |
| <i>lpg0035</i> | small ORF (118aa)                                                        | ORFs of unknown function (unique)       | 8.430  | 9.006  | 8.526  | 8.351  | 4.70E-01 | 8.79E-01 | 0.58  | -0.18 |
| <i>lpg0035</i> | small ORF (118aa)                                                        | ORFs of unknown function (unique)       | 9.615  | 10.852 | 9.421  | 10.858 | 3.99E-01 | 2.10E-01 | 1.24  | 1.44  |
| <i>lpg0036</i> | conserved hypothetical protein                                           | Unknown / hypothetical proteins         | 9.504  | 7.933  | 9.202  | 8.964  | 4.07E-02 | 3.50E-01 | -1.57 | -0.24 |
| <i>lpg0036</i> | conserved hypothetical protein                                           | Unknown / hypothetical proteins         | 9.631  | 9.046  | 9.073  | 9.328  | 1.51E-01 | 4.10E-01 | -0.58 | 0.26  |
| <i>lpg0037</i> | arginine 3rd transport system periplasmic binding protein <i>artJ</i>    | Transport and binding                   | 8.062  | 10.143 | 12.710 | 8.299  | 1.99E-01 | 2.37E-02 | 2.08  | -4.41 |
| <i>lpg0037</i> | arginine 3rd transport system periplasmic binding protein <i>artJ</i>    | Transport and binding                   | 7.922  | 10.690 | 12.757 | 10.592 | 7.86E-02 | 3.37E-01 | 2.77  | -2.16 |
| <i>lpg0038</i> | RIKEN cDNA 4921520G13 gene                                               | Unknown / hypothetical proteins         | 10.025 | 11.068 | 10.707 | 9.184  | 1.89E-02 | 1.61E-02 | 1.04  | -1.52 |
| <i>lpg0038</i> | RIKEN cDNA 4921520G13 gene                                               | Unknown / hypothetical proteins         | 9.950  | 11.098 | 10.420 | 8.958  | 3.70E-03 | 2.47E-02 | 1.15  | -1.46 |
| <i>lpg0039</i> | small ORF (118aa)                                                        | ORFs of unknown function (unique)       | 8.822  | 7.904  | 8.729  | 7.410  | 1.50E-01 | 4.61E-01 | -0.92 | -1.32 |
| <i>lpg0039</i> | small ORF (118aa)                                                        | ORFs of unknown function (unique)       | 7.621  | 7.345  | 7.823  | 8.955  | 8.70E-01 | 7.75E-01 | -0.28 | 1.13  |
| <i>lpg0040</i> | integral membrane protein (YhfP-like protein)                            | Named proteins of general function      | 9.797  | 9.149  | 9.716  | 9.551  | 4.22E-01 | 7.52E-01 | -0.65 | -0.17 |
| <i>lpg0040</i> | integral membrane protein (YhfP-like protein)                            | Named proteins of general function      | 9.645  | 8.885  | 9.341  | 9.341  | 3.22E-01 | 8.12E-01 | -0.76 | -0.15 |
| <i>lpg0041</i> | ORF                                                                      | ORFs of unknown function (unique)       | 9.219  | 9.723  | 9.242  | 9.887  | 2.23E-01 | 3.74E-01 | 0.50  | 0.65  |
| <i>lpg0041</i> | ORF                                                                      | ORFs of unknown function (unique)       | 9.197  | 9.522  | 8.874  | 9.849  | 4.55E-01 | 2.54E-01 | 0.32  | 0.97  |
| <i>lpg0042</i> | ORF                                                                      | ORFs of unknown function (unique)       | 10.711 | 9.466  | 10.910 | 10.111 | 1.47E-01 | 2.99E-02 | -1.25 | -0.80 |
| <i>lpg0042</i> | ORF                                                                      | ORFs of unknown function (unique)       | 10.702 | 10.156 | 10.588 | 10.331 | 1.58E-01 | 3.29E-01 | -0.55 | -0.26 |
| <i>lpg0043</i> | hypothetical (membrane protein, amino acid transporter?)                 | Unknown / hypothetical proteins         | 11.314 | 11.080 | 10.696 | 9.744  | 4.34E-01 | 6.50E-02 | -0.23 | -0.95 |
| <i>lpg0043</i> | hypothetical (membrane protein, amino acid transporter?)                 | Unknown / hypothetical proteins         | 11.276 | 11.019 | 10.602 | 9.947  | 4.34E-01 | 1.57E-01 | -0.26 | -0.65 |
| <i>lpg0044</i> | hypothetical (sterol desaturase)                                         | Lipid Metabolism                        | 7.743  | 8.501  | 8.889  | 7.924  | 3.09E-01 | 4.16E-01 | 0.76  | -0.96 |
| <i>lpg0044</i> | hypothetical (sterol desaturase)                                         | Lipid Metabolism                        | 8.226  | 8.624  | 8.163  | 7.631  | 3.57E-01 | 7.25E-01 | 0.40  | -0.53 |
| <i>lpg0045</i> | small ORF (70aa)                                                         | ORFs of unknown function (unique)       | 11.655 | 11.683 | 11.884 | 11.378 | 9.00E-01 | 2.95E-02 | 0.03  | -0.51 |
| <i>lpg0045</i> | small ORF (70aa)                                                         | ORFs of unknown function (unique)       | 11.690 | 12.289 | 11.960 | 11.848 | 2.64E-01 | 7.51E-01 | 0.60  | -0.11 |
| <i>lpg0046</i> | small ORF (132aa)                                                        | ORFs of unknown function (unique)       | 9.885  | 10.886 | 9.443  | 10.278 | 2.98E-02 | 1.47E-01 | 1.00  | 0.84  |
| <i>lpg0046</i> | small ORF (132aa)                                                        | ORFs of unknown function (unique)       | 10.255 | 10.735 | 9.336  | 10.325 | 1.07E-02 | 5.26E-02 | 0.48  | 0.99  |
| <i>lpg0047</i> | chloramphenicol acetyltransferase (highly similar to antibiotic acetyltr | Detoxification / adaptation             | 10.121 | 10.430 | 10.886 | 9.129  | 1.64E-01 | 1.46E-03 | 0.31  | -1.76 |
| <i>lpg0047</i> | chloramphenicol acetyltransferase (highly similar to antibiotic acetyltr | Detoxification / adaptation             | 10.209 | 10.293 | 10.926 | 9.230  | 8.44E-01 | 1.17E-03 | 0.08  | -1.70 |
| <i>lpg0048</i> | acetyltransferase                                                        | Named proteins of general function      | 8.751  | 9.875  | 8.696  | 9.823  | 1.67E-01 | 2.55E-01 | 1.12  | 1.13  |
| <i>lpg0048</i> | acetyltransferase                                                        | Named proteins of general function      | 9.488  | 11.061 | 9.549  | 11.042 | 1.24E-01 | 1.33E-01 | 1.57  | 1.49  |
| <i>lpg0049</i> | amino acid transporter, permease                                         | Transport and binding                   | 7.319  | 9.567  | 6.524  | 9.598  | 1.32E-02 | 2.23E-02 | 2.25  | 3.07  |
| <i>lpg0049</i> | amino acid transporter, permease                                         | Transport and binding                   | 7.389  | 10.739 | 6.799  | 10.801 | 6.61E-03 | 4.01E-05 | 3.35  | 4.00  |
| <i>lpg0050</i> | integral membrane protein                                                | Named proteins of general function      | 8.846  | 8.571  | 10.491 | 8.795  | 5.61E-01 | 6.95E-02 | -0.28 | -1.70 |
| <i>lpg0050</i> | integral membrane protein                                                | Named proteins of general function      | 8.611  | 8.811  | 10.560 | 9.250  | 3.26E-01 | 4.32E-02 | 0.20  | -1.31 |
| <i>lpg0051</i> | hypothetical (membrane associated protein, conserved domain protei       | Named proteins of general function      | 11.632 | 11.477 | 9.994  | 11.040 | 6.02E-01 | 4.50E-02 | -0.15 | 1.05  |
| <i>lpg0051</i> | hypothetical (membrane associated protein, conserved domain protei       | Named proteins of general function      | 11.720 | 11.308 | 10.442 | 11.506 | 1.30E-01 | 1.90E-02 | -0.41 | 1.06  |
| <i>lpg0052</i> | carboxyphosphoenolpyruvate phosphonmutase (carboxyvinyl-carbo            | Carbohydrate Metabolism                 | 12.006 | 12.221 | 10.481 | 12.310 | 7.79E-01 | 3.32E-03 | 0.21  | 1.83  |
| <i>lpg0052</i> | carboxyphosphoenolpyruvate phosphonmutase (carboxyvinyl-carbo            | Carbohydrate Metabolism                 | 11.907 | 12.319 | 9.960  | 12.369 | 6.16E-01 | 1.57E-03 | 0.41  | 2.41  |
| <i>lpg0053</i> | transferase enzyme                                                       | Named proteins of general function      | 11.006 | 9.216  | 10.354 | 10.065 | 5.59E-03 | 5.62E-01 | -1.79 | -0.29 |
| <i>lpg0053</i> | transferase enzyme                                                       | Named proteins of general function      | 10.770 | 9.386  | 10.347 | 10.322 | 1.66E-02 | 9.59E-01 | -1.38 | -0.03 |
| <i>lpg0054</i> | ORF                                                                      | ORFs of unknown function (unique)       | 11.320 | 10.992 | 10.347 | 11.365 | 4.24E-01 | 4.07E-02 | -0.33 | 1.02  |
| <i>lpg0054</i> | ORF                                                                      | ORFs of unknown function (unique)       | 11.146 | 11.082 | 10.267 | 11.849 | 9.27E-01 | 7.10E-03 | -0.06 | 1.58  |
| <i>lpg0055</i> | transcriptional regulator, LysR family                                   | Transcription factors / DNA binding prc | 8.251  | 9.013  | 8.546  | 9.185  | 2.94E-01 | 2.42E-01 | 0.76  | 0.64  |
| <i>lpg0055</i> | transcriptional regulator, LysR family                                   | Transcription factors / DNA binding prc | 7.915  | 9.285  | 8.204  | 9.196  | 1.23E-01 | 3.97E-01 | 1.37  | 0.99  |
| <i>lpg0056</i> | ORF                                                                      | ORFs of unknown function (unique)       | 11.045 | 12.186 | 13.217 | 11.147 | 8.38E-02 | 5.42E-03 | 1.14  | -2.07 |
| <i>lpg0056</i> | ORF                                                                      | ORFs of unknown function (unique)       | 10.978 | 12.261 | 13.059 | 11.183 | 4.47E-02 | 1.99E-02 | 1.28  | -1.88 |
| <i>lpg0057</i> | putative regulator, MerR family COG0789 transcription regulators         | Transcription factors / DNA binding prc | 9.861  | 9.645  | 10.278 | 9.058  | 3.33E-01 | 1.74E-02 | -0.22 | -1.22 |
| <i>lpg0057</i> | putative regulator, MerR family COG0789 transcription regulators         | Transcription factors / DNA binding prc | 10.035 | 9.753  | 10.401 | 9.423  | 4.41E-01 | 2.27E-02 | -0.28 | -0.98 |
| <i>lpg0058</i> | hypothetical                                                             | Unknown / hypothetical proteins         | 9.553  | 10.026 | 11.280 | 9.587  | 2.73E-01 | 4.59E-04 | 0.47  | -1.69 |
| <i>lpg0058</i> | hypothetical                                                             | Unknown / hypothetical proteins         | 9.573  | 9.822  | 11.288 | 9.774  | 5.08E-01 | 1.54E-03 | 0.25  | -1.51 |
| <i>lpg0059</i> | ORF                                                                      | ORFs of unknown function (unique)       | 8.764  | 8.396  | 7.691  | 8.948  | 2.69E-01 | 8.22E-02 | -0.37 | 1.26  |
| <i>lpg0059</i> | ORF                                                                      | ORFs of unknown function (unique)       | 8.701  | 8.341  | 7.558  | 9.236  | 4.07E-01 | 8.57E-03 | -0.36 | 1.68  |
| <i>lpg0060</i> | methylase                                                                | Named proteins of general function      | 10.915 | 8.492  | 9.820  | 9.257  | 6.47E-03 | 2.91E-01 | -2.42 | -0.56 |
| <i>lpg0060</i> | methylase                                                                | Named proteins of general function      | 11.082 | 6.411  | 9.001  | 8.593  | 4.41E-04 | 7.93E-01 | -4.67 | -0.41 |
| <i>lpg0061</i> | multidrug resistance protein                                             | Transport and binding                   | 12.090 | 9.875  | 11.346 | 10.352 | 1.98E-02 | 1.15E-01 | -2.21 | -0.99 |
| <i>lpg0061</i> | multidrug resistance protein                                             | Transport and binding                   | 12.100 | 10.521 | 11.303 | 10.333 | 2.08E-03 | 8.82E-02 | -1.58 | -0.97 |

|                |                                                                      |             |                                           |        |        |        |        |          |          |       |       |
|----------------|----------------------------------------------------------------------|-------------|-------------------------------------------|--------|--------|--------|--------|----------|----------|-------|-------|
| <i>lpg0062</i> | ORF                                                                  |             | ORFs of unknown function (unique)         | 10.921 | 12.121 | 10.930 | 11.655 | 3.25E-03 | 5.07E-02 | 1.20  | 0.72  |
| <i>lpg0062</i> | ORF                                                                  |             | ORFs of unknown function (unique)         | 10.962 | 12.142 | 10.786 | 11.540 | 5.66E-03 | 1.14E-01 | 1.18  | 0.75  |
| <i>lpg0063</i> | phospho-2-dehydro-3-deoxyheptonate aldolase (2-keto-3 aroH           |             | Amino Acid Metabolism                     | 10.283 | 8.468  | 10.417 | 9.774  | 2.76E-01 | 3.16E-01 | -1.81 | -0.64 |
| <i>lpg0063</i> | phospho-2-dehydro-3-deoxyheptonate aldolase (2-keto-3 aroH           |             | Amino Acid Metabolism                     | 11.286 | 9.000  | 10.443 | 10.165 | 1.68E-02 | 6.08E-01 | -2.29 | -0.28 |
| <i>lpg0064</i> | hypothetical                                                         |             | Unknown / hypothetical proteins           | 12.697 | 9.193  | 12.261 | 11.389 | 5.57E-07 | 1.95E-02 | -3.50 | -0.87 |
| <i>lpg0064</i> | hypothetical                                                         |             | Unknown / hypothetical proteins           | 12.631 | 8.991  | 12.323 | 11.681 | 4.83E-06 | 4.38E-02 | -3.64 | -0.64 |
| <i>lpg0065</i> | ORF                                                                  |             | ORFs of unknown function (unique)         | 12.176 | 9.058  | 11.253 | 10.470 | 1.71E-04 | 4.35E-02 | -3.12 | -0.78 |
| <i>lpg0065</i> | ORF                                                                  |             | ORFs of unknown function (unique)         | 12.183 | 9.141  | 11.268 | 10.718 | 1.52E-04 | 1.73E-01 | -3.04 | -0.55 |
| <i>lpg0066</i> | carbamoyl phosphate synthase large chain (fusion protein: ligase and |             | Amino Acid Metabolism, Nucleotide M       | 12.146 | 8.604  | 11.614 | 10.096 | 3.68E-05 | 6.76E-03 | -3.54 | -1.52 |
| <i>lpg0066</i> | carbamoyl phosphate synthase large chain (fusion protein: ligase and |             | Amino Acid Metabolism, Nucleotide M       | 11.965 | 8.700  | 11.712 | 10.243 | 4.24E-03 | 1.12E-02 | -3.26 | -1.47 |
| <i>lpg0067</i> | similar to unknown protein YdeN of Bacillus subtilis                 |             | Unknown / hypothetical proteins           | 10.025 | 7.573  | 9.491  | 9.780  | 2.77E-02 | 5.01E-01 | -2.45 | 0.29  |
| <i>lpg0067</i> | similar to unknown protein YdeN of Bacillus subtilis                 |             | Unknown / hypothetical proteins           | 10.051 | 8.104  | 9.335  | 9.767  | 5.19E-02 | 3.17E-01 | -1.95 | 0.43  |
| <i>lpg0068</i> | transmembrane protein (ABC transporter (permease, drug/metabolite    |             | Transport and binding                     | 10.645 | 8.917  | 10.178 | 9.252  | 1.51E-02 | 7.93E-02 | -1.73 | -0.93 |
| <i>lpg0068</i> | transmembrane protein (ABC transporter (permease, drug/metabolite    |             | Transport and binding                     | 10.676 | 9.049  | 9.744  | 9.315  | 5.30E-02 | 4.74E-01 | -1.63 | -0.43 |
| <i>lpg0069</i> | tRNA-Asn                                                             |             | tRNA                                      | 12.108 | 11.704 | 12.424 | 10.402 | 4.30E-01 | 5.73E-05 | -0.40 | -2.02 |
| <i>lpg0069</i> | tRNA-Asn                                                             |             | tRNA                                      | 11.737 | 12.559 | 12.406 | 11.029 | 3.80E-01 | 1.75E-01 | 0.82  | -1.38 |
| <i>lpg0070</i> | aspartate aminotransferase A                                         | <i>aatA</i> | Amino Acid Metabolism, Energy Metab       | 11.077 | 9.576  | 10.204 | 10.145 | 1.30E-03 | 8.59E-01 | 1.60  | -0.06 |
| <i>lpg0070</i> | aspartate aminotransferase A                                         | <i>aatA</i> | Amino Acid Metabolism, Energy Metab       | 9.417  | 10.924 | 10.050 | 9.999  | 1.98E-03 | 8.91E-01 | 1.51  | -0.05 |
| <i>lpg0071</i> | ORF; lpg0079 subseq of,                                              |             | ORFs of unknown function (unique)         | 10.762 | 11.727 | 12.073 | 11.790 | 3.27E-02 | 5.66E-01 | 0.97  | -0.28 |
| <i>lpg0071</i> | ORF; lpg0079 subseq of,                                              |             | ORFs of unknown function (unique)         | 10.569 | 11.327 | 11.817 | 11.547 | 2.24E-01 | 5.70E-01 | 0.76  | -0.27 |
| <i>lpg0072</i> | excinuclease ABC subunit B (UvrB)                                    | <i>uvrB</i> | DNA/RNA degradation / restriction         | 10.475 | 9.922  | 10.774 | 11.213 | 3.48E-01 | 3.10E-02 | -0.55 | 0.44  |
| <i>lpg0072</i> | excinuclease ABC subunit B (UvrB)                                    | <i>uvrB</i> | DNA/RNA degradation / restriction         | 10.216 | 10.701 | 10.947 | 11.431 | 2.95E-01 | 1.32E-02 | 0.48  | 0.48  |
| <i>lpg0073</i> | diquanylate cyclase/phosphodiesterase domain 2 (EAL) (sensory box    |             | Signal transduction / other regulatory f  | 9.828  | 8.466  | 12.702 | 6.870  | 1.40E-01 | 5.29E-03 | -1.36 | -5.83 |
| <i>lpg0073</i> | diquanylate cyclase/phosphodiesterase domain 2 (EAL) (sensory box    |             | Signal transduction / other regulatory f  | 9.781  | 8.324  | 12.609 | 8.528  | 1.61E-01 | 1.51E-03 | -1.46 | -4.08 |
| <i>lpg0074</i> | glutamate synthase                                                   |             | Energy Metabolism, Amino Acid Metab       | 10.491 | 8.131  | 12.728 | 8.937  | 8.69E-02 | 6.12E-04 | -2.36 | -3.79 |
| <i>lpg0074</i> | glutamate synthase                                                   |             | Energy Metabolism, Amino Acid Metab       | 9.739  | 9.799  | 12.609 | 9.599  | 9.58E-01 | 4.97E-03 | 0.46  | -3.01 |
| <i>lpg0075</i> | conserved hypothetical protein                                       |             | Unknown / hypothetical proteins           | 9.222  | 10.646 | 9.343  | 10.032 | 1.17E-02 | 4.96E-01 | 1.02  | 0.69  |
| <i>lpg0075</i> | conserved hypothetical protein                                       |             | Unknown / hypothetical proteins           | 9.248  | 10.198 | 9.031  | 9.944  | 1.19E-01 | 3.58E-01 | 0.95  | 0.91  |
| <i>lpg0076</i> | conserved hypothetical protein                                       |             | Unknown / hypothetical proteins           | 12.497 | 13.033 | 13.327 | 13.522 | 5.07E-01 | 7.78E-01 | 0.54  | 0.20  |
| <i>lpg0076</i> | conserved hypothetical protein                                       |             | Unknown / hypothetical proteins           | 12.404 | 14.149 | 13.313 | 14.343 | 7.64E-04 | 1.64E-02 | 1.75  | 1.03  |
| <i>lpg0077</i> | Xaa-Pro aminopeptidase (aminopeptidase PII)                          | <i>pepP</i> | Protein fate / hydrolases / secretion     | 10.431 | 10.964 | 10.046 | 11.489 | 7.22E-02 | 2.93E-03 | 0.53  | 1.44  |
| <i>lpg0077</i> | Xaa-Pro aminopeptidase (aminopeptidase PII)                          | <i>pepP</i> | Protein fate / hydrolases / secretion     | 10.525 | 10.973 | 9.831  | 11.469 | 7.99E-02 | 4.11E-04 | 0.45  | 1.64  |
| <i>lpg0078</i> | 2-octaprenyl-6-methoxyphenol hydroxylase (UbiH protein <i>ubiH</i>   |             | Metabolism of Cofactors and Vitamins      | 12.177 | 12.637 | 12.812 | 12.271 | 2.71E-01 | 6.09E-01 | 0.46  | -0.54 |
| <i>lpg0078</i> | 2-octaprenyl-6-methoxyphenol hydroxylase (UbiH protein <i>ubiH</i>   |             | Metabolism of Cofactors and Vitamins      | 12.249 | 12.997 | 12.744 | 13.335 | 1.66E-03 | 1.92E-02 | 0.75  | 0.59  |
| <i>lpg0079</i> | 2-polyprenyl-6-methoxyphenol hydroxylase (monooxygenase) (oxidor     |             | Metabolism of Cofactors and Vitamins      | 9.820  | 10.204 | 10.315 | 10.075 | 3.49E-01 | 5.20E-01 | 0.38  | -0.24 |
| <i>lpg0079</i> | 2-polyprenyl-6-methoxyphenol hydroxylase (monooxygenase) (oxidor     |             | Metabolism of Cofactors and Vitamins      | 9.691  | 10.377 | 10.346 | 10.189 | 5.69E-02 | 6.27E-01 | 0.69  | -0.16 |
| <i>lpg0080</i> | ORF                                                                  |             | ORFs of unknown function (unique)         | 11.379 | 11.470 | 11.974 | 11.810 | 8.46E-01 | 7.05E-01 | 0.09  | -0.16 |
| <i>lpg0080</i> | ORF                                                                  |             | ORFs of unknown function (unique)         | 11.270 | 10.984 | 11.605 | 11.591 | 3.01E-01 | 9.62E-01 | -0.29 | -0.01 |
| <i>lpg0081</i> | ORF                                                                  |             | ORFs of unknown function (unique)         | 8.961  | 10.686 | 10.524 | 8.940  | 2.07E-04 | 8.49E-03 | 1.72  | -1.58 |
| <i>lpg0081</i> | ORF                                                                  |             | ORFs of unknown function (unique)         | 8.986  | 10.479 | 10.589 | 9.150  | 1.18E-03 | 6.58E-03 | 1.49  | -1.44 |
| <i>lpg0082</i> | hypothetical                                                         |             | Unknown / hypothetical proteins           | 10.222 | 10.811 | 10.736 | 10.470 | 1.52E-01 | 4.98E-01 | 0.59  | -0.27 |
| <i>lpg0082</i> | hypothetical                                                         |             | Unknown / hypothetical proteins           | 10.422 | 10.996 | 10.774 | 10.657 | 5.77E-02 | 8.10E-01 | 0.57  | -0.12 |
| <i>lpg0083</i> | COG0189: glutathione synthase/ribosomal protein S6 modification en   |             | Protein fate / hydrolases / secretion, Ti | 11.394 | 11.068 | 9.131  | 11.073 | 6.01E-01 | 1.84E-01 | -0.33 | 1.94  |
| <i>lpg0083</i> | COG0189: glutathione synthase/ribosomal protein S6 modification en   |             | Protein fate / hydrolases / secretion, Ti | 11.154 | 11.760 | 8.868  | 12.674 | 5.62E-01 | 1.63E-03 | 0.61  | 3.81  |
| <i>lpg0084</i> | hypothetical                                                         |             | Unknown / hypothetical proteins           | 10.855 | 9.205  | 8.349  | 10.470 | 2.68E-03 | 1.39E-02 | -1.65 | 2.12  |
| <i>lpg0084</i> | hypothetical                                                         |             | Unknown / hypothetical proteins           | 11.090 | 8.953  | 8.246  | 10.739 | 1.82E-04 | 3.76E-03 | -2.14 | 2.49  |
| <i>lpg0085</i> | uncharacterized conserved protein COG4067                            |             | Unknown / hypothetical proteins           | 10.109 | 9.978  | 9.710  | 11.533 | 8.74E-01 | 4.20E-03 | -0.13 | 1.82  |
| <i>lpg0085</i> | uncharacterized conserved protein COG4067                            |             | Unknown / hypothetical proteins           | 10.306 | 9.390  | 9.077  | 11.468 | 3.30E-01 | 6.45E-02 | -0.92 | 2.39  |
| <i>lpg0086</i> | ORF                                                                  |             | ORFs of unknown function (unique)         | 9.490  | 10.022 | 9.139  | 9.765  | 1.77E-01 | 4.14E-01 | 0.53  | 0.63  |
| <i>lpg0086</i> | ORF                                                                  |             | ORFs of unknown function (unique)         | 8.874  | 10.004 | 8.519  | 10.337 | 2.81E-02 | 1.20E-01 | 1.13  | 1.82  |
| <i>lpg0087</i> | hypothetical                                                         |             | Unknown / hypothetical proteins           | 9.967  | 9.941  | 9.866  | 10.517 | 9.69E-01 | 2.23E-02 | -0.03 | 0.65  |
| <i>lpg0087</i> | hypothetical                                                         |             | Unknown / hypothetical proteins           | 10.215 | 10.146 | 9.467  | 10.367 | 8.41E-01 | 4.92E-02 | -0.07 | 0.90  |
| <i>lpg0088</i> | glutamine ABC transporter (arginine 3rd transport system periplasmic |             | Transport and binding                     | 10.016 | 10.449 | 13.761 | 9.434  | 7.24E-01 | 2.07E-03 | 0.43  | -4.33 |
| <i>lpg0088</i> | glutamine ABC transporter (arginine 3rd transport system periplasmic |             | Transport and binding                     | 9.936  | 10.477 | 13.733 | 9.632  | 6.60E-01 | 3.17E-03 | 0.54  | -4.10 |
| <i>lpg0089</i> | uncharacterized conserved protein COG1671 (Yail/YqxD family protei   |             | Unknown / hypothetical proteins           | 9.843  | 10.256 | 8.731  | 9.147  | 2.83E-02 | 5.76E-01 | 0.41  | 0.42  |
| <i>lpg0089</i> | uncharacterized conserved protein COG1671 (Yail/YqxD family protei   |             | Unknown / hypothetical proteins           | 9.836  | 10.461 | 9.051  | 10.051 | 5.96E-03 | 3.76E-02 | 0.62  | 1.00  |
| <i>lpg0090</i> | ORF                                                                  |             | ORFs of unknown function (unique)         | 11.280 | 11.174 | 10.929 | 11.041 | 8.72E-01 | 8.69E-01 | -0.11 | 0.11  |
| <i>lpg0090</i> | ORF                                                                  |             | ORFs of unknown function (unique)         | 11.103 | 11.435 | 10.993 | 11.203 | 4.05E-01 | 5.46E-01 | 0.33  | 0.21  |
| <i>lpg0091</i> | conserved domain protein                                             |             | Unknown / hypothetical proteins           | 11.599 | 13.396 | 12.294 | 12.921 | 1.63E-05 | 7.97E-03 | 1.80  | 0.63  |
| <i>lpg0091</i> | conserved domain protein                                             |             | Unknown / hypothetical proteins           | 11.541 | 13.410 | 12.300 | 12.937 | 1.51E-06 | 1.23E-02 | 1.87  | 0.64  |
| <i>lpg0092</i> | (exo)ribonuclease R (virulence-associated protein VacB), <i>vacB</i> |             | Transport and binding, Toxin productio    | 11.688 | 11.148 | 10.584 | 11.747 | 3.28E-01 | 4.59E-03 | -0.54 | 1.16  |
| <i>lpg0092</i> | (exo)ribonuclease R (virulence-associated protein VacB), <i>vacB</i> |             | Transport and binding, Toxin productio    | 11.895 | 11.604 | 10.546 | 11.835 | 5.59E-01 | 3.02E-03 | -0.29 | 1.29  |
| <i>lpg0093</i> | RNA methyltransferase (tRNA/rRNA methyltransferase)                  |             | DNA/RNA degradation / restriction, Trz    | 12.373 | 10.850 | 10.805 | 12.136 | 1.96E-03 | 1.00E-02 | -1.52 | 1.33  |
| <i>lpg0093</i> | RNA methyltransferase (tRNA/rRNA methyltransferase)                  |             | DNA/RNA degradation / restriction, Trz    | 12.171 | 10.793 | 10.680 | 12.251 | 3.26E-02 | 1.91E-03 | -1.38 | 1.57  |

|                |                                                                           |             |                                          |        |        |        |        |          |          |       |       |
|----------------|---------------------------------------------------------------------------|-------------|------------------------------------------|--------|--------|--------|--------|----------|----------|-------|-------|
| <i>lpg0094</i> | ribose-5-phosphate isomerase A                                            | <i>rpiA</i> | Carbohydrate Metabolism, Energy Me       | 11.458 | 10.887 | 10.038 | 11.812 | 2.66E-01 | 2.11E-03 | -0.57 | 1.77  |
| <i>lpg0094</i> | ribose-5-phosphate isomerase A                                            | <i>rpiA</i> | Carbohydrate Metabolism, Energy Me       | 11.676 | 10.898 | 10.101 | 11.932 | 5.19E-02 | 3.30E-03 | -0.78 | 1.83  |
| <i>lpg0095</i> | cytosolic IMP-GMP specific 5'-nucleotidase (cytosolic II)                 |             | Nucleotide Metabolism                    | 8.817  | 9.870  | 8.483  | 10.003 | 5.94E-02 | 2.42E-03 | 1.05  | 1.52  |
| <i>lpg0095</i> | cytosolic IMP-GMP specific 5'-nucleotidase (cytosolic II)                 |             | Nucleotide Metabolism                    | 9.476  | 10.329 | 8.837  | 10.376 | 1.79E-02 | 5.07E-04 | 0.85  | 1.54  |
| <i>lpg0096</i> | ORF                                                                       |             | ORFs of unknown function (unique)        | 10.373 | 10.293 | 11.219 | 11.129 | 9.18E-01 | 7.64E-01 | -0.08 | -0.09 |
| <i>lpg0096</i> | ORF                                                                       |             | ORFs of unknown function (unique)        | 10.492 | 11.013 | 11.137 | 11.249 | 7.52E-02 | 6.81E-01 | 0.52  | 0.11  |
| <i>lpg0097</i> | alkylphosphonate uptake protein PhnA                                      |             | Named proteins of general function       | 11.187 | 10.392 | 10.183 | 10.086 | 3.98E-02 | 8.41E-01 | -0.79 | -0.10 |
| <i>lpg0097</i> | alkylphosphonate uptake protein PhnA                                      |             | Named proteins of general function       | 11.285 | 11.462 | 9.765  | 11.708 | 7.68E-01 | 5.61E-02 | 0.18  | 1.94  |
| <i>lpg0098</i> | two component sensor and regulator, sensor/response regulator?? (h        |             | Signal transduction / other regulatory f | 12.519 | 10.936 | 11.353 | 11.947 | 3.78E-02 | 3.19E-01 | -1.58 | 0.59  |
| <i>lpg0098</i> | two component sensor and regulator, sensor/response regulator?? (h        |             | Signal transduction / other regulatory f | 12.350 | 10.885 | 11.364 | 12.169 | 7.95E-02 | 1.98E-01 | -1.46 | 0.81  |
| <i>lpg0099</i> | DNA polymerase I                                                          | <i>poll</i> | Nucleotide Metabolism, Replication an    | 11.663 | 10.679 | 9.905  | 11.373 | 3.73E-03 | 1.34E-02 | -0.98 | 1.47  |
| <i>lpg0099</i> | DNA polymerase I                                                          | <i>poll</i> | Nucleotide Metabolism, Replication an    | 11.590 | 10.666 | 9.798  | 11.520 | 1.34E-02 | 9.52E-03 | -0.92 | 1.72  |
| <i>lpg0100</i> | UDP-3-O-[3-hydroxymyristoyl] glucosamine N-acyltransferase                |             | Metabolism of Complex Carbohydrate:      | 11.327 | 12.119 | 11.291 | 12.497 | 3.37E-02 | 2.24E-02 | 0.79  | 1.21  |
| <i>lpg0100</i> | UDP-3-O-[3-hydroxymyristoyl] glucosamine N-acyltransferase                |             | Metabolism of Complex Carbohydrate:      | 11.542 | 12.063 | 9.774  | 12.491 | 7.59E-02 | 4.49E-05 | 0.52  | 2.72  |
| <i>lpg0101</i> | ORF                                                                       |             | ORFs of unknown function (unique)        | 11.229 | 11.596 | 9.678  | 10.886 | 3.17E-01 | 3.24E-02 | 0.37  | 1.21  |
| <i>lpg0101</i> | ORF                                                                       |             | ORFs of unknown function (unique)        | 11.181 | 11.740 | 9.725  | 11.088 | 1.95E-01 | 5.19E-03 | 0.56  | 1.36  |
| <i>lpg0102</i> | 3-oxoacyl-[acyl carrier protein] synthase (beta-ketoacyl s' <i>fabF</i>   |             | Lipid Metabolism                         | 11.959 | 11.727 | 11.020 | 12.580 | 8.56E-01 | 4.33E-02 | -0.23 | 1.56  |
| <i>lpg0102</i> | 3-oxoacyl-[acyl carrier protein] synthase (beta-ketoacyl s' <i>fabF</i>   |             | Lipid Metabolism                         | 11.881 | 12.652 | 10.771 | 12.656 | 1.14E-01 | 1.67E-02 | 0.77  | 1.88  |
| <i>lpg0103</i> | N-terminal acetyltransferase, GNAT family (ribosomal prc <i>VipF</i>      |             | Protein fate / hydrolases / secretion    | 10.617 | 9.059  | 9.860  | 9.667  | 1.09E-02 | 6.16E-01 | -1.56 | -0.19 |
| <i>lpg0103</i> | N-terminal acetyltransferase, GNAT family (ribosomal prc <i>VipF</i>      |             | Protein fate / hydrolases / secretion    | 10.563 | 9.305  | 9.781  | 9.630  | 1.42E-02 | 6.99E-01 | -1.26 | -0.15 |
| <i>lpg0104</i> | peptide methionine sulfoxide reductase                                    |             | Detoxification / adaptation              | 10.654 | 9.933  | 8.013  | 10.145 | 1.49E-01 | 1.13E-01 | -0.72 | 2.13  |
| <i>lpg0104</i> | peptide methionine sulfoxide reductase                                    |             | Detoxification / adaptation              | 10.347 | 9.821  | 7.265  | 10.606 | 3.49E-01 | 3.14E-03 | -0.53 | 3.34  |
| <i>lpg0105</i> | (cytochrome oxidase?) (phosphatidylglycerophosphate synthase?) (C         |             | Named proteins of general function       | 10.442 | 11.626 | 9.469  | 11.642 | 1.65E-01 | 2.70E-05 | 1.18  | 2.17  |
| <i>lpg0105</i> | (cytochrome oxidase?) (phosphatidylglycerophosphate synthase?) (C         |             | Named proteins of general function       | 10.703 | 11.590 | 9.225  | 11.713 | 1.00E-01 | 1.39E-04 | 0.89  | 2.49  |
| <i>lpg0106</i> | xanthine/uracil permease                                                  |             | Transport and binding                    | 10.052 | 9.616  | 9.718  | 9.718  | 2.65E-02 | 7.87E-01 | -0.79 | 0.10  |
| <i>lpg0106</i> | xanthine/uracil permease                                                  |             | Transport and binding                    | 9.816  | 9.540  | 9.438  | 10.013 | 5.18E-01 | 2.06E-01 | -1.28 | 0.58  |
| <i>lpg0107</i> | hypothetical (membrane protein required for meiotic division?)            |             | Unknown / hypothetical proteins          | 11.678 | 10.328 | 9.378  | 12.354 | 2.76E-01 | 6.73E-03 | -0.35 | 2.98  |
| <i>lpg0107</i> | hypothetical (membrane protein required for meiotic division?)            |             | Unknown / hypothetical proteins          | 11.514 | 11.723 | 9.765  | 12.966 | 7.83E-01 | 4.09E-04 | 0.21  | 3.20  |
| <i>lpg0108</i> | ORF                                                                       |             | ORFs of unknown function (unique)        | 8.997  | 8.459  | 9.647  | 8.520  | 6.02E-01 | 4.97E-01 | -0.54 | -1.13 |
| <i>lpg0108</i> | ORF                                                                       |             | ORFs of unknown function (unique)        | 8.397  | 8.280  | 7.481  | 9.022  | 8.32E-01 | 1.13E-02 | -0.12 | 1.54  |
| <i>lpg0109</i> | ORF                                                                       |             | ORFs of unknown function (unique)        | 12.008 | 9.980  | 9.504  | 10.539 | 3.26E-02 | 1.05E-01 | -2.03 | 1.04  |
| <i>lpg0109</i> | ORF                                                                       |             | ORFs of unknown function (unique)        | 11.999 | 10.365 | 9.353  | 10.865 | 4.24E-02 | 3.09E-02 | -1.63 | 1.51  |
| <i>lpg0110</i> | ORF                                                                       |             | ORFs of unknown function (unique)        | 11.123 | 10.492 | 9.222  | 10.052 | 1.41E-01 | 4.36E-01 | -0.63 | 0.83  |
| <i>lpg0110</i> | ORF                                                                       |             | ORFs of unknown function (unique)        | 10.756 | 10.803 | 8.979  | 10.508 | 9.15E-01 | 5.61E-02 | 0.05  | 1.53  |
| <i>lpg0111</i> | squalene and phytoene synthases (farnesyl-diphosphate <i>fdtT</i>         |             | Lipid Metabolism                         | 10.698 | 9.358  | 8.604  | 10.244 | 1.17E-01 | 5.13E-02 | -1.34 | 1.64  |
| <i>lpg0111</i> | squalene and phytoene synthases (farnesyl-diphosphate <i>fdtT</i>         |             | Lipid Metabolism                         | 11.013 | 10.380 | 8.683  | 10.650 | 1.37E-01 | 1.62E-02 | -0.63 | 1.97  |
| <i>lpg0112</i> | hypothetical protein                                                      |             | Unknown / hypothetical proteins          | 10.693 | 13.645 | 11.056 | 11.118 | 1.25E-09 | 8.01E-01 | 2.95  | 0.06  |
| <i>lpg0112</i> | hypothetical protein                                                      |             | Unknown / hypothetical proteins          | 10.882 | 13.594 | 10.919 | 11.050 | 1.84E-07 | 6.59E-01 | 2.71  | 0.13  |
| <i>lpg0113</i> | hypothetical (signal transduction protein), competence pr <i>yuxH</i>     |             | Named proteins of general function       | 9.349  | 8.943  | 8.672  | 8.075  | 5.68E-01 | 6.25E-01 | -0.41 | -0.60 |
| <i>lpg0113</i> | hypothetical (signal transduction protein), competence pr <i>yuxH</i>     |             | Named proteins of general function       | 9.550  | 7.665  | 8.793  | 8.648  | 1.08E-02 | 8.64E-01 | -1.89 | -0.14 |
| <i>lpg0114</i> | glycine cleavage system protein P (pyridoxal binding), C-terminal (gly    |             | Amino Acid Metabolism                    | 10.665 | 11.078 | 10.319 | 11.827 | 7.27E-01 | 1.77E-02 | 0.41  | 1.51  |
| <i>lpg0114</i> | glycine cleavage system protein P (pyridoxal binding), C-terminal (gly    |             | Amino Acid Metabolism                    | 10.455 | 11.651 | 10.186 | 12.026 | 9.39E-02 | 6.18E-04 | 1.20  | 1.84  |
| <i>lpg0115</i> | conserved hypothetical protein COG2350                                    |             | Unknown / hypothetical proteins          | 11.204 | 13.066 | 12.306 | 13.483 | 2.06E-04 | 5.53E-03 | 1.86  | 1.18  |
| <i>lpg0115</i> | conserved hypothetical protein COG2350                                    |             | Unknown / hypothetical proteins          | 11.168 | 12.784 | 11.748 | 13.356 | 1.44E-03 | 1.11E-03 | 1.62  | 1.61  |
| <i>lpg0116</i> | glycine cleavage system protein P (pyridoxal binding), N-terminal (gly    |             | Amino Acid Metabolism                    | 12.109 | 13.031 | 12.226 | 13.519 | 1.45E-04 | 2.26E-04 | 0.92  | 1.29  |
| <i>lpg0116</i> | glycine cleavage system protein P (pyridoxal binding), N-terminal (gly    |             | Amino Acid Metabolism                    | 12.031 | 13.135 | 12.144 | 13.578 | 2.32E-04 | 4.18E-05 | 1.10  | 1.43  |
| <i>lpg0117</i> | glycine cleavage system H protein (carrier of aminomethyl <i>gcvH</i>     |             | Amino Acid Metabolism                    | 11.915 | 13.592 | 12.200 | 13.012 | 4.57E-07 | 8.25E-06 | 1.68  | 0.81  |
| <i>lpg0117</i> | glycine cleavage system H protein (carrier of aminomethyl <i>gcvH</i>     |             | Amino Acid Metabolism                    | 11.655 | 13.577 | 11.998 | 12.973 | 7.75E-05 | 7.57E-05 | 1.92  | 0.97  |
| <i>lpg0118</i> | glycine cleavage system T protein (aminomethyltransferase <i>gcvT1</i>    |             | Amino Acid Metabolism, Metabolism o      | 11.030 | 13.049 | 10.764 | 13.269 | 3.12E-05 | 8.10E-07 | 2.02  | 2.50  |
| <i>lpg0118</i> | glycine cleavage system T protein (aminomethyltransferase <i>gcvT1</i>    |             | Amino Acid Metabolism, Metabolism o      | 11.111 | 13.051 | 10.674 | 13.266 | 1.55E-06 | 2.40E-08 | 1.94  | 2.59  |
| <i>lpg0119</i> | ORF transport protein?                                                    |             | Unknown / hypothetical proteins          | 8.746  | 9.657  | 9.961  | 8.305  | 4.44E-01 | 4.35E-01 | 0.91  | -1.66 |
| <i>lpg0119</i> | ORF transport protein?                                                    |             | Unknown / hypothetical proteins          | 8.601  | 9.819  | 8.258  | 10.273 | 2.76E-01 | 1.91E-01 | 1.22  | 2.02  |
| <i>lpg0120</i> | IcmL homolog                                                              |             | Transport and binding, Toxin productio   | 11.332 | 12.409 | 12.942 | 12.523 | 3.81E-02 | 4.19E-01 | 1.08  | -0.42 |
| <i>lpg0120</i> | IcmL homolog                                                              |             | Transport and binding, Toxin productio   | 11.430 | 12.590 | 12.952 | 12.815 | 2.56E-02 | 7.71E-01 | 1.16  | -0.14 |
| <i>lpg0121</i> | ABC transporter, permease protein (nitrate permease)                      |             | Transport and binding                    | 10.086 | 10.074 | 10.300 | 10.673 | 9.68E-01 | 2.59E-01 | -0.01 | 0.37  |
| <i>lpg0121</i> | ABC transporter, permease protein (nitrate permease)                      |             | Transport and binding                    | 10.005 | 10.275 | 10.020 | 10.806 | 4.63E-01 | 5.74E-02 | 0.27  | 0.79  |
| <i>lpg0122</i> | ABC transporter, ATP binding protein (nitrogen transporting)              |             | Transport and binding                    | 11.073 | 10.798 | 11.651 | 11.740 | 3.46E-01 | 7.88E-01 | -0.28 | 0.09  |
| <i>lpg0122</i> | ABC transporter, ATP binding protein (nitrogen transporting)              |             | Transport and binding                    | 10.870 | 11.182 | 11.647 | 11.921 | 1.32E-01 | 4.65E-01 | 0.31  | 0.27  |
| <i>lpg0123</i> | thiol:disulfide interchange protein DsbA (disulfide isomerase <i>dsbA</i> |             | Protein fate / hydrolases / secretion    | 11.970 | 13.941 | 12.406 | 13.067 | 3.15E-03 | 2.36E-01 | 1.97  | 0.66  |
| <i>lpg0123</i> | thiol:disulfide interchange protein DsbA (disulfide isomerase <i>dsbA</i> |             | Protein fate / hydrolases / secretion    | 11.989 | 13.898 | 12.049 | 12.979 | 2.78E-03 | 1.58E-03 | 1.91  | 0.93  |
| <i>lpg0124</i> | cytochrome c4                                                             |             | Energy Metabolism                        | 8.707  | 10.599 | 7.966  | 10.536 | 9.74E-03 | 1.84E-03 | 1.89  | 2.57  |
| <i>lpg0124</i> | cytochrome c4                                                             |             | Energy Metabolism                        | 9.242  | 10.518 | 6.128  | 11.006 | 2.22E-03 | 8.74E-03 | 1.28  | 4.88  |
| <i>lpg0125</i> | GTP binding protein EngB                                                  |             | Signal transduction / other regulatory f | 10.599 | 10.096 | 9.198  | 9.805  | 2.21E-01 | 2.69E-01 | -0.50 | 0.61  |
| <i>lpg0125</i> | GTP binding protein EngB                                                  |             | Signal transduction / other regulatory f | 10.521 | 10.233 | 9.074  | 10.482 | 7.21E-01 | 1.35E-01 | -0.29 | 1.41  |

|                |                                                                     |                 |                                          |        |        |        |        |          |          |       |       |
|----------------|---------------------------------------------------------------------|-----------------|------------------------------------------|--------|--------|--------|--------|----------|----------|-------|-------|
| <i>lpg0126</i> | ninein (GSK3B interacting protein)                                  | <i>cegC2</i>    | Named proteins of general function       | 8.768  | 11.090 | 9.403  | 10.018 | 5.27E-06 | 1.92E-01 | 2.32  | 0.62  |
| <i>lpg0126</i> | ninein (GSK3B interacting protein)                                  | <i>cegC2</i>    | Named proteins of general function       | 8.803  | 11.136 | 9.273  | 10.773 | 5.05E-06 | 4.23E-02 | 2.33  | 1.50  |
| <i>lpg0127</i> | acetyl-coenzyme A synthetase                                        | <i>acsB</i>     | Carbohydrate Metabolism, Energy Me       | 9.921  | 10.446 | 9.621  | 10.181 | 1.25E-01 | 1.74E-01 | 0.53  | 0.56  |
| <i>lpg0127</i> | acetyl-coenzyme A synthetase                                        | <i>acsB</i>     | Carbohydrate Metabolism, Energy Me       | 9.923  | 10.762 | 9.608  | 10.654 | 1.60E-01 | 1.88E-02 | 0.84  | 1.05  |
| <i>lpg0128</i> | 3-hydroxyisobutyrate dehydrogenase                                  |                 | Amino Acid Metabolism                    | 11.271 | 11.705 | 11.086 | 10.966 | 3.34E-02 | 6.71E-01 | 0.43  | -0.12 |
| <i>lpg0128</i> | 3-hydroxyisobutyrate dehydrogenase                                  |                 | Amino Acid Metabolism                    | 11.342 | 12.109 | 11.353 | 11.335 | 8.78E-02 | 9.70E-01 | 0.77  | -0.02 |
| <i>lpg0129</i> | methylmalonate-semialdehyde dehydrogenase (malonic                  | <i>mmsA</i>     | Carbohydrate Metabolism, Amino Acid      | 10.533 | 11.713 | 10.477 | 11.596 | 2.85E-03 | 6.78E-05 | 1.18  | 1.12  |
| <i>lpg0129</i> | methylmalonate-semialdehyde dehydrogenase (malonic                  | <i>mmsA</i>     | Carbohydrate Metabolism, Amino Acid      | 10.434 | 11.912 | 10.048 | 11.382 | 1.07E-03 | 6.90E-03 | 1.48  | 1.33  |
| <i>lpg0130</i> | ORF                                                                 |                 | ORFs of unknown function (unique)        | 11.447 | 11.296 | 11.279 | 9.845  | 8.31E-01 | 1.18E-02 | -0.15 | -1.43 |
| <i>lpg0130</i> | ORF                                                                 |                 | ORFs of unknown function (unique)        | 11.089 | 11.570 | 11.153 | 10.044 | 4.96E-01 | 1.88E-02 | 0.48  | -1.11 |
| <i>lpg0131</i> | dihydropicolinate reductase                                         | <i>dapB</i>     | Amino Acid Metabolism                    | 10.388 | 11.205 | 10.951 | 11.317 | 1.59E-02 | 5.17E-03 | 0.82  | 0.37  |
| <i>lpg0131</i> | dihydropicolinate reductase                                         | <i>dapB</i>     | Amino Acid Metabolism                    | 10.076 | 11.603 | 10.775 | 11.651 | 7.20E-02 | 1.39E-01 | 1.53  | 0.88  |
| <i>lpg0132</i> | small ORF (61aa) hypothetical?                                      |                 | Unknown / hypothetical proteins          | 12.357 | 11.512 | 12.648 | 11.894 | 6.81E-04 | 9.57E-03 | -0.84 | -0.75 |
| <i>lpg0132</i> | small ORF (61aa) hypothetical?                                      |                 | Unknown / hypothetical proteins          | 12.325 | 12.046 | 12.562 | 12.025 | 5.17E-01 | 5.84E-02 | -0.28 | -0.54 |
| <i>lpg0133</i> | activator of ProP osmoprotectant transporter                        | <i>proQm</i>    | Detoxification / adaptation, Signal tran | 10.801 | 10.417 | 11.020 | 10.914 | 7.16E-01 | 8.51E-01 | -0.38 | -0.11 |
| <i>lpg0133</i> | activator of ProP osmoprotectant transporter                        | <i>proQm</i>    | Detoxification / adaptation, Signal tran | 11.679 | 10.680 | 10.573 | 11.225 | 1.20E-02 | 3.34E-01 | -1.00 | 0.65  |
| <i>lpg0134</i> | hypothetical                                                        |                 | Unknown / hypothetical proteins          | 10.483 | 10.123 | 9.426  | 11.318 | 7.62E-01 | 5.00E-02 | -0.36 | 1.89  |
| <i>lpg0134</i> | hypothetical                                                        |                 | Unknown / hypothetical proteins          | 10.179 | 10.315 | 9.503  | 11.720 | 8.68E-01 | 8.12E-03 | 0.14  | 2.22  |
| <i>lpg0135</i> | SdhB                                                                | <i>sdhB</i>     | Named proteins of general function       | 7.659  | 8.071  | 10.810 | 8.022  | 7.60E-01 | 4.67E-03 | 0.41  | -2.79 |
| <i>lpg0135</i> | SdhB                                                                | <i>sdhB</i>     | Named proteins of general function       | 8.331  | 7.799  | 11.075 | 8.563  | 5.42E-01 | 2.62E-03 | -0.53 | -2.51 |
| <i>lpg0136</i> | pyruvate kinase II                                                  | <i>pykA</i>     | Carbohydrate Metabolism, Nucleotide      | 10.247 | 10.405 | 9.451  | 9.916  | 6.95E-01 | 3.68E-01 | 0.16  | 0.46  |
| <i>lpg0136</i> | pyruvate kinase II                                                  | <i>pykA</i>     | Carbohydrate Metabolism, Nucleotide      | 9.949  | 10.482 | 9.318  | 9.984  | 2.29E-01 | 2.78E-01 | 0.53  | 0.67  |
| <i>lpg0137</i> | phosphoglycerate kinase                                             | <i>pgk</i>      | Carbohydrate Metabolism, Energy Me       | 12.017 | 11.193 | 10.530 | 12.078 | 1.22E-01 | 4.66E-03 | -0.82 | 1.55  |
| <i>lpg0137</i> | phosphoglycerate kinase                                             | <i>pgk</i>      | Carbohydrate Metabolism, Energy Me       | 11.978 | 11.490 | 10.193 | 12.482 | 5.55E-01 | 3.02E-03 | -0.49 | 2.29  |
| <i>lpg0138</i> | glyceraldehyde 3-phosphate dehydrogenase                            | <i>gap</i>      | Carbohydrate Metabolism, Metabolism      | 10.439 | 12.395 | 9.106  | 12.705 | 1.57E-02 | 5.04E-06 | 1.96  | 3.60  |
| <i>lpg0138</i> | glyceraldehyde 3-phosphate dehydrogenase                            | <i>gap</i>      | Carbohydrate Metabolism, Metabolism      | 10.518 | 12.420 | 8.326  | 12.702 | 9.82E-03 | 9.66E-05 | 1.90  | 4.38  |
| <i>lpg0139</i> | transketolase I                                                     | <i>tktA</i>     | Carbohydrate Metabolism, Energy Me       | 11.238 | 11.907 | 11.103 | 13.183 | 4.13E-02 | 5.65E-06 | 0.67  | 2.08  |
| <i>lpg0139</i> | transketolase I                                                     | <i>tktA</i>     | Carbohydrate Metabolism, Energy Me       | 11.316 | 11.780 | 10.888 | 13.205 | 1.15E-01 | 1.07E-05 | 0.46  | 2.32  |
| <i>lpg0140</i> | ORF                                                                 |                 | ORFs of unknown function (unique)        | 9.667  | 9.508  | 9.111  | 9.278  | 7.17E-01 | 7.20E-01 | -0.16 | 0.17  |
| <i>lpg0140</i> | ORF                                                                 |                 | ORFs of unknown function (unique)        | 10.148 | 9.868  | 9.306  | 9.869  | 3.52E-01 | 5.05E-02 | -0.28 | 0.56  |
| <i>lpg0141</i> | oligopeptidase A (zinc dependent oligopeptidase)                    |                 | Protein fate / hydrolases / secretion    | 11.327 | 10.947 | 10.364 | 11.104 | 6.52E-02 | 1.75E-01 | -0.38 | 0.74  |
| <i>lpg0141</i> | oligopeptidase A (zinc dependent oligopeptidase)                    |                 | Protein fate / hydrolases / secretion    | 11.257 | 10.836 | 10.329 | 11.560 | 2.01E-01 | 2.71E-04 | -0.42 | 1.23  |
| <i>lpg0142</i> | ; lpg1086; lpg2116; transposase, IS4 family TnpA (Tn5)              |                 | Viral functions / Phage / Transposases   | 10.823 | 11.010 | 11.380 | 11.575 | 6.46E-01 | 3.80E-01 | 0.19  | 0.19  |
| <i>lpg0142</i> | ; lpg1086; lpg2116; transposase, IS4 family TnpA (Tn5)              |                 | Viral functions / Phage / Transposases   | 10.567 | 11.065 | 11.189 | 11.577 | 1.15E-01 | 1.32E-01 | 0.50  | 0.39  |
| <i>lpg0145</i> | site specific recombinase                                           | <i>ccrB</i>     | Viral functions / Phage / Transposases   | 9.610  | 9.618  | 8.971  | 8.971  | 9.77E-01 | 5.80E-01 | 0.01  | 0.36  |
| <i>lpg0145</i> | site specific recombinase                                           | <i>ccrB</i>     | Viral functions / Phage / Transposases   | 9.332  | 10.042 | 9.247  | 10.336 | 1.72E-01 | 7.07E-02 | 0.71  | 1.09  |
| <i>lpg0146</i> | transposase B, TnpA, ISR508 transposase OrfB protein                | <i>tISRs08b</i> | Viral functions / Phage / Transposases   | 10.047 | 11.547 | 10.122 | 11.611 | 3.58E-03 | 1.76E-01 | 1.50  | 1.49  |
| <i>lpg0146</i> | transposase B, TnpA, ISR508 transposase OrfB protein                | <i>tISRs08b</i> | Viral functions / Phage / Transposases   | 11.248 | 11.226 | 9.703  | 11.208 | 9.82E-01 | 9.61E-02 | -0.02 | 1.51  |
| <i>lpg0147</i> | transposase (IS911) (IS600)                                         |                 | Viral functions / Phage / Transposases   | 10.359 | 10.541 | 10.149 | 10.363 | 6.88E-01 | 5.85E-01 | 0.18  | 0.21  |
| <i>lpg0147</i> | transposase (IS911) (IS600)                                         |                 | Viral functions / Phage / Transposases   | 10.267 | 11.107 | 10.268 | 10.779 | 1.27E-01 | 2.94E-01 | 0.84  | 0.51  |
| <i>lpg0148</i> | ORF                                                                 |                 | ORFs of unknown function (unique)        | 10.825 | 10.082 | 11.079 | 10.902 | 2.73E-01 | 6.72E-01 | -0.74 | -0.18 |
| <i>lpg0148</i> | ORF                                                                 |                 | ORFs of unknown function (unique)        | 10.813 | 9.950  | 10.958 | 10.923 | 2.03E-01 | 9.31E-01 | -0.86 | -0.04 |
| <i>lpg0149</i> | ORF                                                                 |                 | ORFs of unknown function (unique)        | 11.486 | 10.569 | 10.750 | 11.561 | 6.43E-02 | 1.08E-01 | -0.92 | 0.81  |
| <i>lpg0149</i> | ORF                                                                 |                 | ORFs of unknown function (unique)        | 11.193 | 10.786 | 10.579 | 11.956 | 6.12E-01 | 3.02E-02 | -0.41 | 1.38  |
| <i>lpg0150</i> | putative phage protein (P-loop ATPase?)                             |                 | Viral functions / Phage / Transposases   | 9.800  | 8.927  | 8.618  | 9.806  | 1.68E-01 | 9.28E-02 | -0.87 | 1.19  |
| <i>lpg0150</i> | putative phage protein (P-loop ATPase?)                             |                 | Viral functions / Phage / Transposases   | 10.417 | 8.571  | 8.395  | 9.782  | 1.60E-04 | 3.87E-02 | -1.85 | 1.39  |
| <i>lpg0151</i> | ORF                                                                 |                 | ORFs of unknown function (unique)        | 7.918  | 7.644  | 10.346 | 7.303  | 7.02E-01 | 2.93E-02 | -0.27 | -3.04 |
| <i>lpg0151</i> | ORF                                                                 |                 | ORFs of unknown function (unique)        | 7.879  | 6.945  | 10.565 | 8.174  | 2.27E-01 | 3.38E-02 | -0.93 | -2.39 |
| <i>lpg0152</i> | hypothetical (GCN5-related N-acetylase, acetyltransferase, GNAT fan |                 | Named proteins of general function       | 10.888 | 10.842 | 8.649  | 10.916 | 7.39E-01 | 1.25E-03 | -0.05 | 2.27  |
| <i>lpg0152</i> | hypothetical (GCN5-related N-acetylase, acetyltransferase, GNAT fan |                 | Named proteins of general function       | 10.215 | 10.954 | 8.199  | 11.071 | 1.15E-01 | 3.61E-04 | 0.74  | 2.87  |
| <i>lpg0153</i> | small ORF (104aa)                                                   |                 | ORFs of unknown function (unique)        | 9.775  | 9.216  | 13.069 | 7.760  | 4.78E-01 | 2.00E-05 | -0.56 | -5.31 |
| <i>lpg0153</i> | small ORF (104aa)                                                   |                 | ORFs of unknown function (unique)        | 9.673  | 9.387  | 13.084 | 9.433  | 7.46E-01 | 3.28E-03 | -0.29 | -3.65 |
| <i>lpg0154</i> | ORF                                                                 |                 | ORFs of unknown function (unique)        | 9.687  | 12.024 | 10.630 | 9.314  | 1.26E-05 | 7.06E-03 | 2.34  | -1.32 |
| <i>lpg0154</i> | ORF                                                                 |                 | ORFs of unknown function (unique)        | 9.806  | 11.984 | 10.844 | 9.793  | 7.88E-07 | 1.50E-02 | 2.18  | -1.05 |
| <i>lpg0155</i> | sensory box (GGDEF/EAL domain), regulatory components of sensor     |                 | Signal transduction / other regulatory f | 7.349  | 7.631  | 10.403 | 6.947  | 8.66E-01 | 2.51E-02 | 0.28  | -3.46 |
| <i>lpg0155</i> | sensory box (GGDEF/EAL domain), regulatory components of sensor     |                 | Signal transduction / other regulatory f | 7.294  | 7.519  | 10.504 | 7.344  | 8.69E-01 | 3.57E-02 | 0.22  | -3.16 |
| <i>lpg0156</i> | signal transduction protein (EAL/GGDEF domain protein) - 2 compon   |                 | Signal transduction / other regulatory f | 9.578  | 9.381  | 11.857 | 9.805  | 8.13E-01 | 4.87E-03 | -0.20 | -2.05 |
| <i>lpg0156</i> | signal transduction protein (EAL/GGDEF domain protein) - 2 compon   |                 | Signal transduction / other regulatory f | 9.031  | 9.827  | 11.760 | 10.054 | 1.75E-01 | 1.10E-02 | 0.80  | -1.71 |
| <i>lpg0157</i> | methionine aminopeptidase                                           | <i>map-1</i>    | Protein fate / hydrolases / secretion    | 9.381  | 9.451  | 9.688  | 9.675  | 7.67E-01 | 9.67E-01 | 0.07  | -0.01 |
| <i>lpg0157</i> | methionine aminopeptidase                                           | <i>map-1</i>    | Protein fate / hydrolases / secretion    | 9.507  | 9.581  | 9.442  | 9.719  | 7.87E-01 | 5.49E-01 | 0.07  | 0.28  |
| <i>lpg0158</i> | hypothetical                                                        |                 | Unknown / hypothetical proteins          | 9.917  | 10.114 | 9.852  | 10.763 | 6.10E-01 | 1.66E-02 | 0.20  | 0.91  |
| <i>lpg0158</i> | hypothetical                                                        |                 | Unknown / hypothetical proteins          | 9.858  | 10.498 | 9.802  | 10.839 | 2.49E-02 | 6.49E-03 | 0.64  | 1.04  |
| <i>lpg0159</i> | small ORF (159aa)                                                   |                 | ORFs of unknown function (unique)        | 8.842  | 9.246  | 9.609  | 9.431  | 6.12E-01 | 8.12E-01 | 0.40  | -0.18 |
| <i>lpg0159</i> | small ORF (159aa)                                                   |                 | ORFs of unknown function (unique)        | 8.812  | 9.226  | 9.427  | 9.361  | 5.99E-01 | 9.24E-01 | 0.41  | -0.07 |

|                |                                                                      |              |                                            |        |        |        |        |          |          |       |       |
|----------------|----------------------------------------------------------------------|--------------|--------------------------------------------|--------|--------|--------|--------|----------|----------|-------|-------|
| <i>lpg0160</i> | ORF                                                                  |              | ORFs of unknown function (unique)          | 10.102 | 11.905 | 10.464 | 12.523 | 4.31E-02 | 7.18E-03 | 1.80  | 2.06  |
| <i>lpg0160</i> | ORF                                                                  |              | ORFs of unknown function (unique)          | 10.270 | 12.124 | 10.151 | 12.368 | 2.14E-03 | 1.32E-02 | 1.85  | 2.22  |
| <i>lpg0161</i> | conserved hypothetical protein COG0432                               |              | Unknown / hypothetical proteins            | 9.697  | 10.224 | 9.975  | 9.697  | 7.79E-02 | 3.78E-01 | 0.53  | -0.28 |
| <i>lpg0161</i> | conserved hypothetical protein COG0432                               |              | Unknown / hypothetical proteins            | 9.567  | 10.047 | 10.006 | 10.002 | 2.43E-01 | 9.88E-01 | 0.48  | 0.00  |
| <i>lpg0162</i> | Homolog of sapA                                                      |              | Unknown / hypothetical proteins            | 10.603 | 9.823  | 10.565 | 10.136 | 2.73E-03 | 1.31E-01 | -0.78 | -0.43 |
| <i>lpg0162</i> | Homolog of sapA                                                      |              | Unknown / hypothetical proteins            | 10.549 | 10.294 | 10.830 | 10.912 | 7.49E-01 | 8.78E-01 | -0.26 | 0.08  |
| <i>lpg0163</i> | hydrolases of the alpha/beta superfamily                             |              | Protein fate / hydrolases / secretion      | 8.907  | 8.788  | 11.654 | 7.765  | 8.90E-01 | 7.60E-03 | -0.12 | -3.89 |
| <i>lpg0163</i> | hydrolases of the alpha/beta superfamily                             |              | Protein fate / hydrolases / secretion      | 8.850  | 9.213  | 11.717 | 8.321  | 6.83E-01 | 1.82E-03 | 0.36  | -3.40 |
| <i>lpg0164</i> | ORF                                                                  |              | ORFs of unknown function (unique)          | 8.191  | 9.454  | 9.230  | 9.852  | 2.05E-02 | 8.09E-02 | 1.26  | 0.62  |
| <i>lpg0164</i> | ORF                                                                  |              | ORFs of unknown function (unique)          | 8.223  | 9.595  | 8.668  | 9.585  | 8.05E-02 | 5.55E-02 | 1.37  | 0.92  |
| <i>lpg0165</i> | conserved hypothetical protein                                       |              | Unknown / hypothetical proteins            | 12.426 | 12.695 | 14.055 | 11.600 | 4.93E-01 | 5.17E-05 | 0.27  | -2.46 |
| <i>lpg0165</i> | conserved hypothetical protein                                       |              | Unknown / hypothetical proteins            | 12.383 | 12.647 | 14.029 | 11.662 | 5.46E-01 | 9.75E-05 | 0.26  | -2.37 |
| <i>lpg0166</i> | hypothetical (integral membrane protein) (methyl-independent misma   |              | Named proteins of general function         | 8.556  | 9.352  | 9.264  | 9.454  | 3.34E-01 | 4.67E-01 | 0.80  | 0.19  |
| <i>lpg0166</i> | hypothetical (integral membrane protein) (methyl-independent misma   |              | Named proteins of general function         | 8.994  | 9.499  | 9.150  | 9.565  | 2.05E-01 | 1.20E-01 | 0.51  | 0.42  |
| <i>lpg0167</i> | peptide chain release factor                                         |              | Protein fate / hydrolases / secretion      | 8.554  | 9.743  | 8.599  | 9.739  | 1.78E-01 | 1.96E-02 | 1.19  | 1.14  |
| <i>lpg0167</i> | peptide chain release factor                                         |              | Protein fate / hydrolases / secretion      | 9.026  | 9.973  | 8.678  | 9.923  | 9.38E-02 | 9.03E-04 | 0.95  | 1.24  |
| <i>lpg0168</i> | hypothetical protein                                                 |              | Unknown / hypothetical proteins            | 9.940  | 8.639  | 8.994  | 8.656  | 7.60E-03 | 6.13E-01 | -1.30 | -0.34 |
| <i>lpg0168</i> | hypothetical protein                                                 |              | Unknown / hypothetical proteins            | 9.655  | 8.887  | 8.542  | 8.763  | 2.07E-01 | 7.52E-01 | -0.77 | 0.22  |
| <i>lpg0169</i> | probable transmembrane protein                                       |              | Unknown / hypothetical proteins            | 10.760 | 9.071  | 9.802  | 9.341  | 2.96E-04 | 1.25E-01 | -1.69 | -0.46 |
| <i>lpg0169</i> | probable transmembrane protein                                       |              | Unknown / hypothetical proteins            | 10.712 | 9.524  | 9.622  | 9.488  | 1.50E-02 | 8.67E-01 | -1.19 | -0.13 |
| <i>lpg0170</i> | probable ABC transport system permease protein                       |              | Transport and binding                      | 10.251 | 8.884  | 8.862  | 9.543  | 2.13E-02 | 1.31E-01 | -1.37 | 0.68  |
| <i>lpg0170</i> | probable ABC transport system permease protein                       |              | Transport and binding                      | 10.130 | 8.527  | 8.626  | 10.190 | 1.60E-02 | 1.77E-01 | -1.60 | 1.56  |
| <i>lpg0171</i> | ORF                                                                  | <i>legU1</i> | ORFs of unknown function (unique)          | 9.055  | 9.178  | 8.436  | 9.337  | 7.97E-01 | 3.40E-01 | 0.12  | 0.90  |
| <i>lpg0171</i> | ORF                                                                  | <i>legU1</i> | ORFs of unknown function (unique)          | 8.950  | 9.810  | 8.097  | 10.032 | 4.04E-02 | 5.12E-02 | 0.86  | 1.94  |
| <i>lpg0172</i> | ORF                                                                  |              | ORFs of unknown function (unique)          | 11.744 | 10.365 | 10.225 | 12.376 | 3.15E-04 | 5.28E-03 | -1.38 | 2.15  |
| <i>lpg0172</i> | ORF                                                                  |              | ORFs of unknown function (unique)          | 11.814 | 10.283 | 10.179 | 12.434 | 1.63E-03 | 3.60E-03 | -1.53 | 2.26  |
| <i>lpg0173</i> | transcriptional regulator, LysR (cyn operator positive regul. oxyR   |              | Detoxification / adaptation, Transcription | 9.818  | 8.622  | 8.119  | 8.884  | 2.70E-01 | 2.83E-01 | -1.20 | 0.76  |
| <i>lpg0173</i> | transcriptional regulator, LysR (cyn operator positive regul. oxyR   |              | Detoxification / adaptation, Transcription | 9.758  | 9.842  | 6.945  | 9.318  | 8.41E-01 | 7.85E-02 | 0.08  | 2.37  |
| <i>lpg0174</i> | pyoverdine biosynthesis protein PvcA                                 | <i>pvcA</i>  | Named proteins of general function         | 9.457  | 10.964 | 9.164  | 10.470 | 2.84E-03 | 2.33E-03 | 1.51  | 1.31  |
| <i>lpg0174</i> | pyoverdine biosynthesis protein PvcA                                 | <i>pvcA</i>  | Named proteins of general function         | 8.824  | 11.103 | 9.103  | 10.574 | 1.12E-02 | 1.18E-03 | 2.28  | 1.47  |
| <i>lpg0175</i> | pyoverdine biosynthesis protein PvcB                                 |              | Named proteins of general function         | 9.380  | 11.504 | 7.784  | 9.902  | 1.01E-04 | 2.54E-04 | 2.12  | 2.12  |
| <i>lpg0175</i> | pyoverdine biosynthesis protein PvcB                                 |              | Named proteins of general function         | 9.465  | 11.565 | 7.319  | 10.075 | 1.33E-04 | 1.83E-04 | 2.10  | 2.76  |
| <i>lpg0176</i> | FAD monooxygenase, PheA/TfdB family (phenol 2-monooxygenase)         |              | Metabolism of Cofactors and Vitamins       | 9.627  | 10.977 | 8.750  | 10.760 | 1.67E-03 | 3.76E-03 | 1.35  | 2.01  |
| <i>lpg0176</i> | FAD monooxygenase, PheA/TfdB family (phenol 2-monooxygenase)         |              | Metabolism of Cofactors and Vitamins       | 9.997  | 11.068 | 8.740  | 10.760 | 1.92E-02 | 1.37E-03 | 1.07  | 2.02  |
| <i>lpg0177</i> | chloramphenicol resistance protein (arabinose efflux permease)       |              | Transport and binding                      | 9.672  | 8.816  | 9.271  | 9.347  | 3.36E-01 | 9.34E-01 | -0.86 | 0.08  |
| <i>lpg0177</i> | chloramphenicol resistance protein (arabinose efflux permease)       |              | Transport and binding                      | 9.794  | 10.153 | 8.972  | 9.633  | 7.23E-01 | 5.83E-01 | 0.36  | 0.66  |
| <i>lpg0178</i> | hypothetical                                                         |              | Unknown / hypothetical proteins            | 10.627 | 10.460 | 9.369  | 11.070 | 7.30E-01 | 4.33E-04 | -0.17 | 1.70  |
| <i>lpg0178</i> | hypothetical                                                         |              | Unknown / hypothetical proteins            | 11.866 | 10.822 | 9.513  | 11.566 | 2.24E-02 | 7.79E-04 | -1.04 | 2.05  |
| <i>lpg0179</i> | O-methyltransferase                                                  |              | Named proteins of general function         | 9.964  | 9.232  | 9.930  | 9.154  | 8.35E-02 | 7.15E-02 | -0.73 | -0.78 |
| <i>lpg0179</i> | O-methyltransferase                                                  |              | Named proteins of general function         | 9.895  | 8.575  | 9.964  | 9.264  | 2.70E-02 | 3.50E-01 | -1.32 | -0.70 |
| <i>lpg0180</i> | heat shock protein, protease HtpX (metalloprotease, zinc htpX        |              | Detoxification / adaptation, Protein fate  | 9.117  | 9.934  | 10.493 | 9.822  | 6.59E-02 | 3.56E-01 | 0.82  | -0.67 |
| <i>lpg0180</i> | heat shock protein, protease HtpX (metalloprotease, zinc htpX        |              | Detoxification / adaptation, Protein fate  | 9.514  | 10.224 | 10.645 | 10.373 | 4.83E-02 | 5.31E-01 | 0.71  | -0.27 |
| <i>lpg0181</i> | ORF                                                                  |              | ORFs of unknown function (unique)          | 9.323  | 10.496 | 8.680  | 9.859  | 3.12E-01 | 3.32E-01 | 1.17  | 1.18  |
| <i>lpg0181</i> | ORF                                                                  |              | ORFs of unknown function (unique)          | 9.654  | 11.325 | 8.701  | 10.036 | 5.15E-02 | 2.77E-01 | 1.67  | 1.33  |
| <i>lpg0182</i> | small ORF (150aa)                                                    |              | ORFs of unknown function (unique)          | 10.107 | 9.645  | 8.549  | 9.735  | 3.59E-01 | 6.35E-02 | -0.46 | 1.19  |
| <i>lpg0182</i> | small ORF (150aa)                                                    |              | ORFs of unknown function (unique)          | 9.900  | 9.672  | 8.185  | 9.506  | 6.54E-01 | 8.37E-02 | -0.23 | 1.32  |
| <i>lpg0183</i> | amine oxidase, flavin containing (dehydrogenase) (cyclopropane fatty |              | Named proteins of general function         | 9.543  | 9.970  | 8.664  | 10.560 | 4.09E-01 | 2.28E-03 | 0.43  | 1.90  |
| <i>lpg0183</i> | amine oxidase, flavin containing (dehydrogenase) (cyclopropane fatty |              | Named proteins of general function         | 9.138  | 10.352 | 8.391  | 11.581 | 3.20E-01 | 1.28E-02 | 1.21  | 3.19  |
| <i>lpg0184</i> | ABC sugar transporter, periplasmic sugar binding protein             |              | Transport and binding                      | 11.869 | 11.728 | 11.063 | 12.338 | 6.04E-01 | 1.26E-03 | -0.14 | 1.28  |
| <i>lpg0184</i> | ABC sugar transporter, periplasmic sugar binding protein             |              | Transport and binding                      | 12.475 | 11.628 | 10.954 | 12.351 | 1.67E-02 | 1.27E-03 | -0.85 | 1.40  |
| <i>lpg0185</i> | ABC sugar transporter, ATP binding protein                           |              | Transport and binding                      | 9.512  | 10.344 | 7.899  | 10.826 | 1.40E-01 | 6.92E-03 | 0.83  | 2.93  |
| <i>lpg0185</i> | ABC sugar transporter, ATP binding protein                           |              | Transport and binding                      | 9.567  | 10.563 | 7.261  | 10.657 | 2.41E-02 | 1.32E-02 | 1.00  | 3.40  |
| <i>lpg0186</i> | ABC sugar transporter, permease (D-ribose high affinity transport)   |              | Transport and binding                      | 9.018  | 9.573  | 8.660  | 8.686  | 4.88E-01 | 9.72E-01 | 0.55  | 0.03  |
| <i>lpg0186</i> | ABC sugar transporter, permease (D-ribose high affinity transport)   |              | Transport and binding                      | 9.056  | 8.988  | 7.545  | 8.557  | 9.55E-01 | 4.49E-01 | -0.07 | 1.01  |
| <i>lpg0187</i> | L. pneumophila zinc metalloprotein (peptidase, M20/M25/M40 family)   |              | Protein fate / hydrolases / secretion      | 11.124 | 12.193 | 9.930  | 12.211 | 3.41E-04 | 3.03E-04 | 1.07  | 2.28  |
| <i>lpg0187</i> | L. pneumophila zinc metalloprotein (peptidase, M20/M25/M40 family)   |              | Protein fate / hydrolases / secretion      | 11.170 | 12.087 | 9.657  | 12.211 | 1.30E-01 | 1.37E-02 | 0.92  | 2.55  |
| <i>lpg0188</i> | acyl CoA transferase/carnitine dehydratase (CAIB/BAIF family protein |              | Named proteins of general function         | 10.925 | 10.438 | 10.735 | 10.917 | 1.03E-01 | 4.73E-01 | -0.49 | 0.18  |
| <i>lpg0188</i> | acyl CoA transferase/carnitine dehydratase (CAIB/BAIF family protein |              | Named proteins of general function         | 10.937 | 10.504 | 10.696 | 11.071 | 5.99E-02 | 2.38E-01 | -0.43 | 0.38  |
| <i>lpg0189</i> | ORF                                                                  |              | ORFs of unknown function (unique)          | 8.348  | 9.025  | 8.812  | 8.996  | 1.83E-01 | 6.05E-01 | 0.68  | 0.18  |
| <i>lpg0189</i> | ORF                                                                  |              | ORFs of unknown function (unique)          | 9.235  | 10.422 | 8.225  | 10.150 | 5.65E-03 | 5.02E-02 | 1.19  | 1.93  |
| <i>lpg0190</i> | small ORF (73aa)?                                                    |              | ORFs of unknown function (unique)          | 9.366  | 10.469 | 9.648  | 10.143 | 2.81E-01 | 5.71E-01 | 1.10  | 0.50  |
| <i>lpg0190</i> | small ORF (73aa)?                                                    |              | ORFs of unknown function (unique)          | 8.999  | 10.385 | 9.446  | 10.144 | 2.62E-01 | 3.98E-01 | 1.39  | 0.70  |
| <i>lpg0191</i> | ORF                                                                  |              | ORFs of unknown function (unique)          | 10.437 | 8.890  | 9.912  | 10.463 | 2.31E-02 | 5.31E-02 | -1.55 | 0.55  |
| <i>lpg0191</i> | ORF                                                                  |              | ORFs of unknown function (unique)          | 10.208 | 8.869  | 9.363  | 10.123 | 4.23E-02 | 1.51E-01 | -1.34 | 0.76  |

|                |                                                                           |                  |                                          |        |        |        |        |          |          |       |       |
|----------------|---------------------------------------------------------------------------|------------------|------------------------------------------|--------|--------|--------|--------|----------|----------|-------|-------|
| <i>lpg0192</i> | heat shock hsp20 (alpha crystallin) proteins family                       |                  | Named proteins of general function       | 10.375 | 10.257 | 11.150 | 9.495  | 7.90E-01 | 1.15E-02 | -0.12 | -1.65 |
| <i>lpg0192</i> | heat shock hsp20 (alpha crystallin) proteins family                       |                  | Named proteins of general function       | 9.828  | 9.893  | 11.214 | 9.690  | 9.05E-01 | 8.52E-03 | 0.07  | -1.52 |
| <i>lpg0193</i> | small ORF (64aa)?                                                         |                  | ORFs of unknown function (unique)        | 8.460  | 8.991  | 8.463  | 8.950  | 5.09E-01 | 6.20E-01 | 0.53  | 0.49  |
| <i>lpg0193</i> | small ORF (64aa)?                                                         |                  | ORFs of unknown function (unique)        | 8.585  | 8.917  | 8.729  | 9.537  | 6.88E-01 | 4.03E-01 | 0.33  | 0.81  |
| <i>lpg0194</i> | catalase/(hydro)peroxidase KatG                                           |                  | Amino Acid Metabolism, Energy Metab      | 10.170 | 11.336 | 9.070  | 11.321 | 2.93E-04 | 1.74E-03 | 1.17  | 2.25  |
| <i>lpg0194</i> | catalase/(hydro)peroxidase KatG                                           |                  | Amino Acid Metabolism, Energy Metab      | 10.896 | 11.006 | 8.184  | 11.098 | 8.93E-01 | 6.59E-02 | 0.11  | 2.91  |
| <i>lpg0195</i> | ORF                                                                       |                  | ORFs of unknown function (unique)        | 8.795  | 9.119  | 10.082 | 8.629  | 3.00E-01 | 6.25E-03 | 0.32  | -1.45 |
| <i>lpg0195</i> | ORF                                                                       |                  | ORFs of unknown function (unique)        | 8.569  | 8.958  | 9.698  | 8.970  | 4.84E-01 | 2.73E-01 | 0.39  | -0.73 |
| <i>lpg0196</i> | ORF                                                                       |                  | ORFs of unknown function (unique)        | 9.306  | 9.412  | 10.657 | 8.647  | 7.57E-01 | 1.41E-02 | 0.11  | -2.01 |
| <i>lpg0196</i> | ORF                                                                       |                  | ORFs of unknown function (unique)        | 8.872  | 9.024  | 10.619 | 9.087  | 6.44E-01 | 1.17E-02 | 0.15  | -1.53 |
| <i>lpg0197</i> | conserved hypothetical protein                                            |                  | Unknown / hypothetical proteins          | 10.550 | 9.635  | 11.619 | 10.100 | 1.84E-01 | 9.26E-04 | -0.92 | -1.52 |
| <i>lpg0197</i> | conserved hypothetical protein                                            |                  | Unknown / hypothetical proteins          | 9.996  | 9.854  | 11.683 | 10.381 | 7.18E-01 | 5.42E-03 | -0.14 | -1.30 |
| <i>lpg0198</i> | hypothetical                                                              |                  | Named proteins of general function       | 9.845  | 9.080  | 8.917  | 9.117  | 9.58E-02 | 5.63E-01 | -0.77 | 0.20  |
| <i>lpg0198</i> | hypothetical                                                              |                  | Named proteins of general function       | 10.097 | 9.030  | 8.276  | 8.914  | 1.47E-03 | 3.27E-01 | -1.07 | 0.64  |
| <i>lpg0199</i> | cytochrome D ubiquinol oxidase subunit I (cytochrome bc <sub>1</sub> cydA |                  | Energy Metabolism                        | 10.059 | 10.110 | 11.894 | 10.116 | 8.92E-01 | 2.84E-03 | 0.05  | -1.78 |
| <i>lpg0199</i> | cytochrome D ubiquinol oxidase subunit I (cytochrome bc <sub>1</sub> cydA |                  | Energy Metabolism                        | 10.030 | 10.356 | 11.952 | 10.782 | 3.45E-01 | 2.26E-02 | 0.33  | -1.17 |
| <i>lpg0200</i> | cytochrome D ubiquinol oxidase subunit II, cyanide insen <i>qxtB</i>      |                  | Energy Metabolism                        | 9.832  | 7.848  | 11.110 | 9.598  | 5.26E-02 | 8.83E-02 | -1.98 | -1.51 |
| <i>lpg0200</i> | cytochrome D ubiquinol oxidase subunit II, cyanide insen <i>qxtB</i>      |                  | Energy Metabolism                        | 10.218 | 9.001  | 10.851 | 10.052 | 7.56E-02 | 1.75E-01 | -1.22 | -0.80 |
| <i>lpg0201</i> | hypothetical                                                              |                  | Unknown / hypothetical proteins          | 11.160 | 10.248 | 11.435 | 10.305 | 3.15E-02 | 5.83E-03 | -0.91 | -1.13 |
| <i>lpg0201</i> | hypothetical                                                              |                  | Unknown / hypothetical proteins          | 11.173 | 10.173 | 11.533 | 10.564 | 4.88E-03 | 1.02E-02 | -1.00 | -0.97 |
| <i>lpg0202</i> | conserved hypothetical protein                                            |                  | Unknown / hypothetical proteins          | 10.325 | 10.300 | 11.056 | 10.451 | 9.68E-01 | 2.75E-01 | -0.02 | -0.61 |
| <i>lpg0202</i> | conserved hypothetical protein                                            |                  | Unknown / hypothetical proteins          | 10.294 | 10.381 | 10.002 | 10.088 | 8.49E-01 | 8.81E-01 | 0.09  | 0.09  |
| <i>lpg0203</i> | fusion of two types of conserved hypothetical proteins (ki <i>yfhG</i>    |                  | Named proteins of general function       | 11.366 | 10.597 | 9.319  | 10.226 | 1.47E-01 | 1.29E-01 | -0.77 | 0.91  |
| <i>lpg0203</i> | fusion of two types of conserved hypothetical proteins (ki <i>yfhG</i>    |                  | Named proteins of general function       | 11.335 | 10.690 | 9.409  | 10.379 | 2.55E-01 | 5.33E-02 | -0.65 | 0.97  |
| <i>lpg0204</i> | 2-deoxy-D-gluconate-3-dehydrogenase (3-oxoacyl-[acyl carrier protei       |                  | Carbohydrate Metabolism                  | 9.414  | 10.679 | 8.200  | 11.278 | 2.60E-02 | 8.95E-05 | 1.27  | 3.08  |
| <i>lpg0204</i> | 2-deoxy-D-gluconate-3-dehydrogenase (3-oxoacyl-[acyl carrier protei       |                  | Carbohydrate Metabolism                  | 8.616  | 11.454 | 8.385  | 11.641 | 2.30E-03 | 5.47E-05 | 2.84  | 3.26  |
| <i>lpg0205</i> | hypothetical                                                              |                  | Unknown / hypothetical proteins          | 11.012 | 10.932 | 12.311 | 11.332 | 7.23E-01 | 1.52E-02 | -0.08 | -0.98 |
| <i>lpg0205</i> | hypothetical                                                              |                  | Unknown / hypothetical proteins          | 11.068 | 10.761 | 12.277 | 11.349 | 3.36E-01 | 2.37E-02 | -0.31 | -0.93 |
| <i>lpg0206</i> | membrane protein                                                          |                  | Named proteins of general function       | 10.473 | 10.220 | 10.145 | 9.616  | 7.84E-01 | 6.73E-01 | -0.25 | -0.53 |
| <i>lpg0206</i> | membrane protein                                                          |                  | Named proteins of general function       | 10.136 | 9.595  | 9.427  | 9.853  | 4.46E-01 | 6.72E-01 | -0.54 | 0.43  |
| <i>lpg0207</i> | small ORF (56aa)?                                                         |                  | ORFs of unknown function (unique)        | 9.398  | 10.310 | 10.551 | 10.014 | 3.85E-01 | 6.05E-01 | 0.91  | -0.54 |
| <i>lpg0207</i> | small ORF (56aa)?                                                         |                  | ORFs of unknown function (unique)        | 8.808  | 9.941  | 9.556  | 9.918  | 3.45E-01 | 6.80E-01 | 1.13  | 0.36  |
| <i>lpg0208</i> | serine/threonine-protein kinase                                           | <i>ceg6/pkn5</i> | Signal transduction / other regulatory f | 9.128  | 9.099  | 8.638  | 9.817  | 9.66E-01 | 1.30E-01 | -0.03 | 1.18  |
| <i>lpg0208</i> | serine/threonine-protein kinase                                           | <i>ceg6/pkn6</i> | Signal transduction / other regulatory f | 8.472  | 9.263  | 7.848  | 9.987  | 2.82E-01 | 2.21E-02 | 0.79  | 2.14  |
| <i>lpg0209</i> | ORF                                                                       |                  | ORFs of unknown function (unique)        | 9.996  | 9.072  | 9.486  | 9.090  | 1.43E-01 | 6.02E-01 | -0.92 | -0.40 |
| <i>lpg0209</i> | ORF                                                                       |                  | ORFs of unknown function (unique)        | 9.894  | 8.463  | 8.855  | 9.352  | 1.02E-01 | 5.70E-01 | -1.43 | 0.50  |
| <i>lpg0210</i> | ORF                                                                       |                  | ORFs of unknown function (unique)        | 9.966  | 10.891 | 10.168 | 10.166 | 3.79E-02 | 9.96E-01 | 0.93  | 0.00  |
| <i>lpg0210</i> | ORF                                                                       |                  | ORFs of unknown function (unique)        | 9.935  | 11.383 | 9.977  | 10.297 | 1.17E-02 | 5.78E-01 | 1.45  | 0.32  |
| <i>lpg0211</i> | tryptophan rich sensory protein TspO (carotenoid biosynt <i>tspO</i>      |                  | Named proteins of general function       | 9.730  | 9.019  | 9.649  | 9.466  | 1.01E-01 | 6.79E-01 | -0.71 | -0.18 |
| <i>lpg0211</i> | tryptophan rich sensory protein TspO (carotenoid biosynt <i>tspO</i>      |                  | Named proteins of general function       | 10.192 | 9.632  | 10.023 | 9.909  | 6.18E-01 | 8.66E-01 | -0.56 | -0.11 |
| <i>lpg0212</i> | deoxyribodipyrimidine photolyase (DNA photolyase) <i>phrB</i>             |                  | DNA/RNA degradation / restriction        | 10.284 | 9.566  | 9.247  | 10.190 | 1.99E-02 | 8.12E-02 | -0.72 | 0.94  |
| <i>lpg0212</i> | deoxyribodipyrimidine photolyase (DNA photolyase) <i>phrB</i>             |                  | DNA/RNA degradation / restriction        | 10.167 | 10.176 | 8.858  | 10.689 | 9.80E-01 | 3.93E-03 | 0.01  | 1.83  |
| <i>lpg0213</i> | inner membrane protein (LrgB family protein) (serotonin transporter?)     |                  | Named proteins of general function       | 9.293  | 9.240  | 11.062 | 8.665  | 9.52E-01 | 5.65E-03 | -0.05 | -2.40 |
| <i>lpg0213</i> | inner membrane protein (LrgB family protein) (serotonin transporter?)     |                  | Named proteins of general function       | 8.825  | 9.750  | 10.443 | 8.578  | 3.65E-01 | 1.34E-01 | 0.92  | -1.86 |
| <i>lpg0214</i> | murein hydrolase exporter (LrgA family protein)                           |                  | Transport and binding                    | 10.095 | 10.487 | 10.887 | 10.127 | 3.70E-01 | 3.95E-01 | 0.39  | -0.76 |
| <i>lpg0214</i> | murein hydrolase exporter (LrgA family protein)                           |                  | Transport and binding                    | 12.907 | 11.381 | 11.714 | 11.253 | 7.04E-03 | 2.27E-01 | -1.53 | -0.46 |
| <i>lpg0215</i> | transcriptional regulator, LysR family                                    |                  | Transcription factors / DNA binding prc  | 9.589  | 9.234  | 9.394  | 9.329  | 4.26E-01 | 8.73E-01 | -0.36 | -0.06 |
| <i>lpg0215</i> | transcriptional regulator, LysR family                                    |                  | Transcription factors / DNA binding prc  | 9.619  | 9.663  | 9.358  | 9.790  | 9.15E-01 | 4.89E-01 | 0.04  | 0.43  |
| <i>lpg0216</i> | uncharacterized conserved hypothetical protein COG3024                    |                  | Unknown / hypothetical proteins          | 11.139 | 9.484  | 9.981  | 9.664  | 1.06E-01 | 7.70E-01 | -1.66 | -0.32 |
| <i>lpg0216</i> | uncharacterized conserved hypothetical protein COG3024                    |                  | Unknown / hypothetical proteins          | 11.063 | 9.409  | 9.801  | 9.801  | 8.79E-02 | 5.96E-01 | -1.65 | 0.38  |
| <i>lpg0217</i> | phosphoribosylaminoimidazole carboxylase, ATPase sub <i>purK</i>          |                  | Nucleotide Metabolism                    | 11.132 | 11.119 | 10.959 | 11.822 | 9.76E-01 | 3.29E-03 | -0.01 | 0.86  |
| <i>lpg0217</i> | phosphoribosylaminoimidazole carboxylase, ATPase sub <i>purK</i>          |                  | Nucleotide Metabolism                    | 11.312 | 11.321 | 10.838 | 11.891 | 9.60E-01 | 6.12E-04 | 0.01  | 1.05  |
| <i>lpg0218</i> | phosphoribosylaminoimidazole carboxylase, catalytic sut <i>purE</i>       |                  | Nucleotide Metabolism                    | 9.923  | 10.553 | 10.677 | 10.956 | 8.21E-02 | 3.10E-01 | 0.63  | 0.28  |
| <i>lpg0218</i> | phosphoribosylaminoimidazole carboxylase, catalytic sut <i>purE</i>       |                  | Nucleotide Metabolism                    | 10.038 | 10.634 | 10.454 | 10.867 | 2.70E-03 | 6.42E-02 | 0.60  | 0.41  |
| <i>lpg0219</i> | hypothetical                                                              |                  | Unknown / hypothetical proteins          | 10.257 | 12.217 | 9.570  | 11.917 | 3.96E-03 | 6.34E-05 | 1.96  | 2.35  |
| <i>lpg0219</i> | hypothetical                                                              |                  | Unknown / hypothetical proteins          | 10.250 | 12.453 | 9.521  | 11.939 | 8.78E-04 | 4.77E-05 | 2.20  | 2.42  |
| <i>lpg0220</i> | hypothetical                                                              |                  | Unknown / hypothetical proteins          | 8.600  | 10.303 | 8.799  | 9.973  | 3.47E-04 | 2.62E-02 | 1.70  | 1.17  |
| <i>lpg0220</i> | hypothetical                                                              |                  | Unknown / hypothetical proteins          | 8.461  | 10.505 | 8.834  | 10.274 | 2.91E-03 | 2.76E-02 | 2.04  | 1.44  |
| <i>lpg0221</i> | hypothetical                                                              |                  | Unknown / hypothetical proteins          | 6.170  | 7.612  | 8.456  | 7.370  | 1.41E-01 | 9.27E-02 | 1.44  | -1.09 |
| <i>lpg0221</i> | hypothetical                                                              |                  | Unknown / hypothetical proteins          | 6.821  | 7.336  | 7.536  | 7.318  | 7.00E-01 | 6.05E-01 | 0.52  | -0.22 |
| <i>lpg0222</i> | NADH dehydrogenase subunit 5 (NADH-ubiquinone oxidoreductase (            |                  | Metabolism of Cofactors and Vitamins     | 7.633  | 8.063  | 8.508  | 7.686  | 6.00E-01 | 4.25E-01 | 0.43  | -0.82 |
| <i>lpg0222</i> | NADH dehydrogenase subunit 5 (NADH-ubiquinone oxidoreductase (            |                  | Metabolism of Cofactors and Vitamins     | 8.301  | 8.082  | 8.788  | 8.214  | 8.41E-01 | 6.58E-01 | -0.22 | -0.57 |
| <i>lpg0223</i> | transcriptional regulator, LysR family                                    |                  | Transcription factors / DNA binding prc  | 11.297 | 10.067 | 9.565  | 10.648 | 2.35E-03 | 5.85E-02 | -1.23 | 1.08  |
| <i>lpg0223</i> | transcriptional regulator, LysR family                                    |                  | Transcription factors / DNA binding prc  | 11.267 | 10.720 | 9.462  | 11.789 | 5.00E-01 | 3.20E-02 | -0.55 | 2.33  |

|                |                                                                      |                                                 |        |        |        |        |          |          |       |       |
|----------------|----------------------------------------------------------------------|-------------------------------------------------|--------|--------|--------|--------|----------|----------|-------|-------|
| <i>lpg0224</i> | toxin secretion ABC transporter HlyB/MsbA family ATP-binding protein | Transport and binding                           | 9.760  | 8.516  | 9.260  | 7.659  | 1.24E-02 | 1.40E-02 | -1.24 | -1.60 |
| <i>lpg0224</i> | toxin secretion ABC transporter HlyB/MsbA family ATP-binding protein | Transport and binding                           | 9.732  | 8.301  | 8.447  | 8.010  | 5.85E-02 | 6.24E-01 | -1.43 | -0.44 |
| <i>lpg0225</i> | RND efflux membrane fusion protein                                   | Transport and binding                           | 9.283  | 8.126  | 8.834  | 8.978  | 3.20E-01 | 8.17E-01 | -1.16 | 0.14  |
| <i>lpg0225</i> | RND efflux membrane fusion protein                                   | Transport and binding                           | 8.893  | 8.476  | 8.281  | 8.988  | 5.74E-01 | 1.67E-01 | -0.42 | 0.71  |
| <i>lpg0226</i> | multidrug efflux protein, outer membrane component                   | Transport and binding                           | 7.328  | 8.649  | 7.882  | 8.112  | 6.43E-02 | 7.65E-01 | 1.32  | 0.23  |
| <i>lpg0226</i> | multidrug efflux protein, outer membrane component                   | Transport and binding                           | 7.861  | 8.275  | 8.331  | 8.627  | 4.55E-01 | 6.60E-01 | 0.41  | 0.30  |
| <i>lpg0227</i> | ORF                                                                  | ORFs of unknown function (unique)               | 11.790 | 14.939 | 12.840 | 12.700 | 1.39E-06 | 5.73E-01 | 3.15  | -0.14 |
| <i>lpg0227</i> | ORF                                                                  | ORFs of unknown function (unique)               | 11.824 | 14.888 | 12.797 | 12.683 | 3.83E-06 | 6.57E-01 | 3.06  | -0.11 |
| <i>lpg0228</i> | amino acid permease family protein (amino acid transporter)          | Transport and binding                           | 10.160 | 10.329 | 10.312 | 9.616  | 5.41E-01 | 4.12E-02 | 0.17  | -0.70 |
| <i>lpg0228</i> | amino acid permease family protein (amino acid transporter)          | Transport and binding                           | 10.364 | 10.197 | 10.152 | 9.912  | 6.28E-01 | 6.25E-01 | -0.17 | -0.24 |
| <i>lpg0229</i> | heme oxygenase                                                       | Named proteins of general function              | 11.166 | 10.904 | 10.365 | 11.490 | 4.20E-01 | 1.09E-03 | -0.26 | 1.12  |
| <i>lpg0229</i> | heme oxygenase                                                       | Named proteins of general function              | 11.105 | 10.793 | 9.548  | 11.195 | 3.57E-01 | 1.97E-02 | -0.31 | 1.65  |
| <i>lpg0230</i> | sensor histidine kinase (two component response regulator)           | Signal transduction / other regulatory function | 11.193 | 9.423  | 11.487 | 9.940  | 3.31E-04 | 4.87E-04 | -1.77 | -1.55 |
| <i>lpg0230</i> | sensor histidine kinase (two component response regulator)           | Signal transduction / other regulatory function | 11.196 | 9.683  | 11.692 | 10.191 | 1.27E-03 | 2.99E-05 | -1.51 | -1.50 |
| <i>lpg0231</i> | heavy metal transporting P-type ATPase (cation transporting)         | Transport and binding                           | 8.347  | 8.892  | 7.715  | 8.426  | 4.10E-01 | 1.15E-01 | 0.55  | 0.71  |
| <i>lpg0231</i> | heavy metal transporting P-type ATPase (cation transporting)         | Transport and binding                           | 9.062  | 9.222  | 7.875  | 9.210  | 7.60E-01 | 1.63E-01 | 0.16  | 1.33  |
| <i>lpg0232</i> | transcriptional regulator np20 (Fur family) (ferric uptake)          | Transcription factors / DNA binding proteins    | 11.633 | 11.313 | 10.452 | 11.130 | 1.37E-01 | 1.25E-01 | -0.32 | 0.68  |
| <i>lpg0232</i> | transcriptional regulator np20 (Fur family) (ferric uptake)          | Transcription factors / DNA binding proteins    | 11.627 | 11.323 | 10.437 | 11.184 | 1.47E-01 | 1.02E-01 | -0.30 | 0.75  |
| <i>lpg0233</i> | benzoylformate decarboxylase                                         | Biodegradation of Xenobiotics                   | 10.890 | 10.338 | 13.071 | 9.784  | 3.62E-01 | 2.32E-03 | -0.55 | -3.29 |
| <i>lpg0233</i> | benzoylformate decarboxylase                                         | Biodegradation of Xenobiotics                   | 10.952 | 10.423 | 13.095 | 10.409 | 4.67E-01 | 1.67E-02 | -0.53 | -2.69 |
| <i>lpg0234</i> | SidE                                                                 | Toxin production / other pathogen function      | 8.112  | 8.999  | 9.005  | 9.526  | 4.63E-02 | 2.09E-01 | 0.89  | 0.52  |
| <i>lpg0234</i> | SidE                                                                 | Toxin production / other pathogen function      | 8.380  | 8.991  | 8.863  | 9.674  | 4.54E-02 | 8.66E-03 | 0.61  | 0.81  |
| <i>lpg0235</i> | hypothetical protein                                                 | Unknown / hypothetical proteins                 | 10.180 | 9.124  | 8.785  | 8.946  | 6.86E-02 | 8.21E-01 | -1.06 | 0.16  |
| <i>lpg0235</i> | hypothetical protein                                                 | Unknown / hypothetical proteins                 | 10.056 | 9.390  | 8.331  | 8.813  | 2.22E-01 | 7.12E-01 | -0.67 | 0.48  |
| <i>lpg0236</i> | ORF                                                                  | ORFs of unknown function (unique)               | 10.330 | 9.736  | 10.688 | 10.303 | 1.53E-01 | 3.94E-01 | -0.59 | -0.39 |
| <i>lpg0236</i> | ORF                                                                  | ORFs of unknown function (unique)               | 10.433 | 9.972  | 10.558 | 10.587 | 3.50E-01 | 8.83E-01 | -0.46 | 0.03  |
| <i>lpg0237</i> | lipolytic enzyme (3-oxoadipate enol-lactone hydrolase)               | Protein fate / hydrolases / secretion           | 11.803 | 12.420 | 12.343 | 12.441 | 4.70E-03 | 4.84E-01 | 0.62  | 0.10  |
| <i>lpg0237</i> | lipolytic enzyme (3-oxoadipate enol-lactone hydrolase)               | Protein fate / hydrolases / secretion           | 11.757 | 12.606 | 12.353 | 12.581 | 1.26E-03 | 2.88E-01 | 0.85  | 0.23  |
| <i>lpg0238</i> | glycine betaine aldehyde dehydrogenase                               | Amino Acid Metabolism                           | 11.508 | 12.517 | 12.513 | 11.974 | 5.02E-04 | 1.16E-01 | 1.01  | -0.54 |
| <i>lpg0238</i> | glycine betaine aldehyde dehydrogenase                               | Amino Acid Metabolism                           | 11.612 | 12.466 | 12.517 | 12.153 | 5.50E-03 | 2.35E-01 | 0.85  | -0.36 |
| <i>lpg0239</i> | 4-aminobutyrate aminotransferase                                     | Amino Acid Metabolism, Metabolism of            | 11.117 | 10.150 | 11.812 | 10.393 | 1.01E-03 | 1.39E-03 | -0.97 | -1.42 |
| <i>lpg0239</i> | 4-aminobutyrate aminotransferase                                     | Amino Acid Metabolism, Metabolism of            | 11.214 | 9.925  | 11.848 | 10.455 | 9.65E-03 | 1.17E-03 | -1.29 | -1.39 |
| <i>lpg0240</i> | DNA repair protein                                                   | Replication and Repair                          | 11.756 | 11.745 | 12.788 | 12.080 | 9.78E-01 | 4.38E-02 | -0.01 | -0.71 |
| <i>lpg0240</i> | DNA repair protein                                                   | Replication and Repair                          | 11.725 | 11.677 | 12.737 | 12.068 | 9.09E-01 | 4.51E-02 | -0.05 | -0.67 |
| <i>lpg0241</i> | glutaminase                                                          | Amino Acid Metabolism, Metabolism of            | 10.388 | 8.973  | 11.448 | 9.342  | 9.92E-04 | 2.12E-02 | -1.41 | -2.11 |
| <i>lpg0241</i> | glutaminase                                                          | Amino Acid Metabolism, Metabolism of            | 10.368 | 9.204  | 11.118 | 9.293  | 1.52E-02 | 9.22E-02 | -1.16 | -1.83 |
| <i>lpg0242</i> | D-3-phosphoglycerate dehydrogenase (D-isomer specific)               | Amino Acid Metabolism                           | 10.956 | 9.981  | 11.626 | 10.251 | 4.34E-03 | 2.13E-02 | -0.98 | -1.37 |
| <i>lpg0242</i> | D-3-phosphoglycerate dehydrogenase (D-isomer specific)               | Amino Acid Metabolism                           | 10.824 | 9.971  | 11.687 | 10.604 | 1.68E-03 | 1.35E-02 | -0.85 | -1.08 |
| <i>lpg0243</i> | short chain dehydrogenase/(reductase)                                | Named proteins of general function              | 11.865 | 11.824 | 11.280 | 10.997 | 9.59E-01 | 4.88E-01 | -0.04 | -0.28 |
| <i>lpg0243</i> | short chain dehydrogenase/(reductase)                                | Named proteins of general function              | 11.019 | 11.811 | 10.778 | 11.138 | 1.33E-02 | 3.28E-01 | 0.79  | 0.36  |
| <i>lpg0244</i> | pyridine nucleotide-disulfide oxidoreductase, FAD-dependent          | Carbohydrate Metabolism, Amino Acid             | 9.743  | 9.073  | 12.901 | 9.174  | 3.57E-01 | 1.75E-03 | -0.67 | -3.73 |
| <i>lpg0244</i> | pyridine nucleotide-disulfide oxidoreductase, FAD-dependent          | Carbohydrate Metabolism, Amino Acid             | 9.687  | 10.096 | 12.738 | 10.343 | 7.31E-01 | 9.48E-02 | 0.41  | -2.40 |
| <i>lpg0245</i> | NAD-glutamate dehydrogenase                                          | Named proteins of general function              | 7.020  | 8.153  | 12.177 | 7.698  | 6.03E-01 | 3.22E-02 | 1.13  | -4.48 |
| <i>lpg0245</i> | NAD-glutamate dehydrogenase                                          | Named proteins of general function              | 8.568  | 8.644  | 12.639 | 8.562  | 9.49E-01 | 2.23E-02 | 0.08  | -4.08 |
| <i>lpg0246</i> | ORF                                                                  | ORFs of unknown function (unique)               | 10.264 | 9.593  | 10.722 | 9.942  | 3.01E-02 | 1.62E-02 | -0.67 | -0.78 |
| <i>lpg0246</i> | ORF                                                                  | ORFs of unknown function (unique)               | 9.800  | 9.094  | 10.508 | 9.958  | 3.47E-01 | 4.76E-02 | -0.71 | -0.55 |
| <i>lpg0247</i> | ORF                                                                  | ORFs of unknown function (unique)               | 8.467  | 8.846  | 8.672  | 8.493  | 6.09E-01 | 7.67E-01 | 0.38  | -0.18 |
| <i>lpg0247</i> | ORF                                                                  | ORFs of unknown function (unique)               | 7.211  | 8.794  | 8.037  | 9.374  | 1.67E-01 | 2.05E-01 | 1.58  | 1.34  |
| <i>lpg0248</i> | arsenate reductase                                                   | Transport and binding, Signal transduction      | 9.802  | 10.652 | 10.237 | 10.652 | 2.64E-02 | 2.50E-01 | 0.85  | 0.42  |
| <i>lpg0248</i> | arsenate reductase                                                   | Transport and binding, Signal transduction      | 11.787 | 11.006 | 10.491 | 10.950 | 3.16E-01 | 3.26E-01 | -0.78 | 0.46  |
| <i>lpg0249</i> | stearoyl CoA 9-desaturase (fatty acid desaturase)                    | Lipid Metabolism                                | 10.309 | 9.497  | 10.130 | 9.296  | 5.62E-02 | 9.04E-02 | -0.81 | -0.83 |
| <i>lpg0249</i> | stearoyl CoA 9-desaturase (fatty acid desaturase)                    | Lipid Metabolism                                | 10.062 | 9.163  | 10.028 | 9.338  | 3.99E-02 | 2.54E-01 | -0.90 | -0.69 |
| <i>lpg0250</i> | ATP-dependent RNA helicase, DEAD box family                          | DNA/RNA degradation / restriction               | 11.436 | 10.389 | 11.699 | 10.199 | 2.29E-03 | 1.45E-04 | -1.05 | -1.50 |
| <i>lpg0250</i> | ATP-dependent RNA helicase, DEAD box family                          | DNA/RNA degradation / restriction               | 10.954 | 10.011 | 11.634 | 10.160 | 2.04E-02 | 1.65E-04 | -0.94 | -1.47 |
| <i>lpg0251</i> | RNA binding protein (cold-inducible)                                 | DNA/RNA degradation / restriction               | 12.248 | 10.145 | 10.313 | 10.709 | 3.56E-04 | 4.64E-01 | -2.10 | 0.40  |
| <i>lpg0251</i> | RNA binding protein (cold-inducible)                                 | DNA/RNA degradation / restriction               | 12.219 | 10.021 | 10.236 | 10.741 | 3.73E-04 | 3.55E-01 | -2.20 | 0.50  |
| <i>lpg0252</i> | membrane protein                                                     | Named proteins of general function              | 11.532 | 11.382 | 10.369 | 10.828 | 8.31E-01 | 5.26E-01 | -0.15 | 0.46  |
| <i>lpg0252</i> | membrane protein                                                     | Named proteins of general function              | 11.538 | 11.553 | 10.162 | 11.514 | 9.77E-01 | 4.19E-03 | 0.02  | 1.35  |
| <i>lpg0253</i> | acetyltransferase, GNAT family (amino acid acetyltransferase)        | Protein fate / hydrolases / secretion           | 11.129 | 11.667 | 12.005 | 11.731 | 1.49E-02 | 2.78E-01 | 0.54  | -0.27 |
| <i>lpg0253</i> | acetyltransferase, GNAT family (amino acid acetyltransferase)        | Protein fate / hydrolases / secretion           | 11.186 | 11.618 | 11.940 | 11.714 | 5.76E-02 | 3.37E-01 | 0.43  | -0.23 |
| <i>lpg0254</i> | ORF                                                                  | ORFs of unknown function (unique)               | 9.717  | 9.505  | 9.813  | 9.632  | 3.51E-01 | 7.20E-01 | -0.21 | -0.18 |
| <i>lpg0254</i> | ORF                                                                  | ORFs of unknown function (unique)               | 9.472  | 10.242 | 9.361  | 9.780  | 4.51E-01 | 6.77E-01 | 0.77  | 0.42  |
| <i>lpg0255</i> | outer membrane channel protein (outer membrane efflux protein)       | Transport and binding                           | 10.071 | 9.029  | 8.782  | 9.200  | 3.35E-02 | 4.62E-01 | -1.04 | 0.42  |
| <i>lpg0255</i> | outer membrane channel protein (outer membrane efflux protein)       | Transport and binding                           | 9.553  | 8.640  | 7.832  | 9.046  | 1.79E-01 | 2.65E-01 | -0.91 | 1.21  |



|                |                                                                         |              |                                          |        |        |        |        |          |          |       |       |
|----------------|-------------------------------------------------------------------------|--------------|------------------------------------------|--------|--------|--------|--------|----------|----------|-------|-------|
| <i>lpg0256</i> | conserved domain protein                                                |              | Unknown / hypothetical proteins          | 10.113 | 9.697  | 9.384  | 9.798  | 4.32E-01 | 5.89E-01 | -0.42 | 0.41  |
| <i>lpg0256</i> | conserved domain protein                                                |              | Unknown / hypothetical proteins          | 9.962  | 9.304  | 9.135  | 9.619  | 8.97E-02 | 5.61E-01 | -0.66 | 0.48  |
| <i>lpg0257</i> | multidrug resistance secretion protein                                  |              | Transport and binding                    | 9.972  | 10.323 | 11.560 | 10.515 | 3.24E-01 | 7.96E-02 | 0.35  | -1.04 |
| <i>lpg0257</i> | multidrug resistance secretion protein                                  |              | Transport and binding                    | 9.622  | 10.657 | 10.119 | 10.283 | 1.88E-01 | 7.54E-01 | 1.04  | 0.16  |
| <i>lpg0258</i> | ORF                                                                     |              | ORFs of unknown function (unique)        | 10.631 | 10.846 | 12.014 | 9.814  | 7.52E-01 | 7.04E-03 | 0.21  | -2.20 |
| <i>lpg0258</i> | ORF                                                                     |              | ORFs of unknown function (unique)        | 10.570 | 10.283 | 11.705 | 9.913  | 5.63E-01 | 2.57E-02 | -0.29 | -1.79 |
| <i>lpg0259</i> | hypothetical protein                                                    |              | Unknown / hypothetical proteins          | 9.606  | 8.394  | 11.292 | 9.430  | 3.06E-01 | 3.09E-02 | -1.21 | -1.86 |
| <i>lpg0259</i> | hypothetical protein                                                    |              | Unknown / hypothetical proteins          | 9.646  | 9.251  | 10.540 | 9.772  | 3.71E-01 | 4.45E-01 | -0.39 | -0.77 |
| <i>lpg0260</i> | small ORF (132aa)                                                       |              | ORFs of unknown function (unique)        | 13.764 | 12.826 | 12.494 | 15.272 | 3.74E-02 | 2.26E-05 | -0.94 | 2.78  |
| <i>lpg0260</i> | small ORF (132aa)                                                       |              | ORFs of unknown function (unique)        | 13.967 | 12.995 | 12.538 | 15.341 | 6.15E-02 | 1.15E-05 | -0.97 | 2.80  |
| <i>lpg0261</i> | ISSod6 transposase (IS1301)                                             |              | Viral functions / Phage / Transposases   | 10.329 | 8.436  | 9.389  | 9.554  | 1.43E-02 | 8.55E-01 | -1.89 | 0.17  |
| <i>lpg0261</i> | ISSod6 transposase (IS1301)                                             |              | Viral functions / Phage / Transposases   | 10.322 | 9.276  | 9.730  | 10.364 | 6.98E-02 | 3.72E-01 | -1.05 | 0.63  |
| <i>lpg0262</i> | bacteriophage related DNA polymerase (uracil DNA glycosylase)           |              | Nucleotide Metabolism, Replication an    | 10.747 | 10.953 | 10.195 | 11.219 | 6.83E-01 | 6.31E-03 | 0.21  | 1.02  |
| <i>lpg0262</i> | bacteriophage related DNA polymerase (uracil DNA glycosylase)           |              | Nucleotide Metabolism, Replication an    | 10.296 | 10.821 | 10.108 | 11.333 | 1.58E-01 | 2.51E-02 | 0.52  | 1.22  |
| <i>lpg0263</i> | MFS transporter family protein (major facilitator superfamily)          |              | Transport and binding                    | 10.057 | 10.053 | 11.194 | 10.135 | 9.95E-01 | 1.25E-01 | 0.00  | -1.06 |
| <i>lpg0263</i> | MFS transporter family protein (major facilitator superfamily)          |              | Transport and binding                    | 9.731  | 10.190 | 10.098 | 10.134 | 4.20E-01 | 9.55E-01 | 0.46  | 0.04  |
| <i>lpg0264</i> | unknown protein                                                         |              | Unknown / hypothetical proteins          | 9.893  | 9.278  | 9.999  | 9.383  | 1.36E-01 | 1.02E-01 | -0.62 | -0.62 |
| <i>lpg0264</i> | unknown protein                                                         |              | Unknown / hypothetical proteins          | 10.014 | 9.479  | 9.963  | 9.541  | 6.64E-02 | 3.80E-01 | -0.53 | -0.42 |
| <i>lpg0265</i> | multicopper oxidase (copper oxidase), copper resistance protein A       |              | Transport and binding                    | 10.629 | 10.300 | 9.524  | 10.821 | 4.72E-01 | 5.26E-02 | -0.33 | 1.30  |
| <i>lpg0265</i> | multicopper oxidase (copper oxidase), copper resistance protein A       |              | Transport and binding                    | 10.340 | 9.968  | 9.013  | 10.558 | 5.72E-01 | 1.76E-01 | -0.37 | 1.54  |
| <i>lpg0266</i> | small ORF (144aa)                                                       |              | ORFs of unknown function (unique)        | 9.718  | 9.453  | 8.869  | 10.642 | 5.20E-01 | 3.11E-03 | -0.26 | 1.77  |
| <i>lpg0266</i> | small ORF (144aa)                                                       |              | ORFs of unknown function (unique)        | 9.661  | 9.876  | 8.979  | 11.105 | 7.27E-01 | 7.39E-04 | 0.21  | 2.13  |
| <i>lpg0267</i> | magnesium and cobalt transport protein CorA                             | <i>corA</i>  | Transport and binding                    | 9.802  | 8.964  | 11.658 | 8.481  | 2.37E-01 | 7.41E-02 | -0.84 | -3.18 |
| <i>lpg0267</i> | magnesium and cobalt transport protein CorA                             | <i>corA</i>  | Transport and binding                    | 9.718  | 8.933  | 11.688 | 8.784  | 2.95E-01 | 1.52E-02 | -0.79 | -2.90 |
| <i>lpg0268</i> | hypothetical (hydrolase?)                                               |              | Unknown / hypothetical proteins          | 10.422 | 8.765  | 8.543  | 9.858  | 1.35E-02 | 7.14E-02 | -1.66 | 1.32  |
| <i>lpg0268</i> | hypothetical (hydrolase?)                                               |              | Unknown / hypothetical proteins          | 10.263 | 9.526  | 8.637  | 10.496 | 4.07E-01 | 1.17E-01 | -0.74 | 1.86  |
| <i>lpg0269</i> | hypothetical (ABC binding protein)                                      |              | Named proteins of general function       | 10.396 | 10.532 | 10.200 | 10.371 | 9.20E-01 | 9.00E-01 | 0.14  | 0.17  |
| <i>lpg0269</i> | hypothetical (ABC binding protein)                                      |              | Named proteins of general function       | 8.335  | 10.364 | 10.212 | 10.542 | 7.65E-02 | 1.70E-01 | 2.03  | 0.33  |
| <i>lpg0270</i> | nicotinate phosphoribosyltransferase                                    |              | Metabolism of Cofactors and Vitamins     | 10.994 | 9.522  | 11.637 | 10.012 | 4.32E-05 | 4.39E-04 | -1.47 | -1.63 |
| <i>lpg0270</i> | nicotinate phosphoribosyltransferase                                    |              | Metabolism of Cofactors and Vitamins     | 11.104 | 9.335  | 11.707 | 10.145 | 1.47E-03 | 1.18E-04 | -1.77 | -1.56 |
| <i>lpg0271</i> | bifunctional pyrazinamidase/nicotinamidase                              | <i>pncA</i>  | Amino Acid Metabolism, Metabolism o      | 10.939 | 9.550  | 11.164 | 10.537 | 6.74E-04 | 4.31E-03 | -1.39 | -0.63 |
| <i>lpg0271</i> | bifunctional pyrazinamidase/nicotinamidase                              | <i>pncA</i>  | Amino Acid Metabolism, Metabolism o      | 10.974 | 9.607  | 11.091 | 10.831 | 5.33E-05 | 3.84E-01 | -1.37 | -0.26 |
| <i>lpg0272</i> | cysteine transferase                                                    |              | Transport and binding                    | 10.570 | 11.817 | 9.738  | 11.656 | 6.38E-02 | 7.85E-04 | 1.25  | 1.92  |
| <i>lpg0272</i> | cysteine transferase                                                    |              | Transport and binding                    | 10.508 | 11.808 | 9.364  | 11.676 | 3.09E-02 | 3.20E-04 | 1.30  | 2.31  |
| <i>lpg0273</i> | major facilitator superfamily transporter (multi-drug resistance transp |              | Transport and binding                    | 8.029  | 8.637  | 9.244  | 8.748  | 5.58E-01 | 4.77E-01 | 0.61  | -0.50 |
| <i>lpg0273</i> | major facilitator superfamily transporter (multi-drug resistance transp |              | Transport and binding                    | 8.658  | 8.661  | 8.981  | 9.110  | 9.97E-01 | 8.38E-01 | 0.00  | 0.13  |
| <i>lpg0274</i> | transcriptional regulator, LysR family                                  |              | Transcription factors / DNA binding prc  | 12.392 | 11.691 | 11.022 | 12.418 | 7.34E-02 | 5.58E-03 | -0.70 | 1.40  |
| <i>lpg0274</i> | transcriptional regulator, LysR family                                  |              | Transcription factors / DNA binding prc  | 12.410 | 11.528 | 10.928 | 12.421 | 7.46E-02 | 3.03E-03 | -0.88 | 1.49  |
| <i>lpg0275</i> | SdbA                                                                    | <i>sdbA</i>  | Named proteins of general function       | 7.849  | 9.376  | 8.322  | 8.286  | 2.57E-02 | 9.58E-01 | 1.53  | -0.04 |
| <i>lpg0275</i> | SdbA                                                                    | <i>sdbA</i>  | Named proteins of general function       | 8.094  | 9.398  | 7.606  | 8.019  | 2.61E-02 | 7.27E-01 | 1.30  | 0.41  |
| <i>lpg0276</i> | ORF                                                                     | <i>legG2</i> | ORFs of unknown function (unique)        | 11.079 | 11.368 | 11.086 | 9.333  | 7.71E-01 | 3.24E-02 | 0.29  | -1.75 |
| <i>lpg0276</i> | ORF                                                                     | <i>legG2</i> | ORFs of unknown function (unique)        | 10.410 | 11.345 | 10.433 | 9.869  | 1.71E-02 | 8.83E-02 | 0.94  | -0.56 |
| <i>lpg0277</i> | sensory box protein (GGDEF family protein) LssE protein (diguanyl       |              | Signal transduction / other regulatory f | 11.152 | 9.823  | 13.215 | 10.833 | 5.49E-02 | 1.17E-03 | -1.33 | -2.38 |
| <i>lpg0277</i> | sensory box protein (GGDEF family protein) LssE protein (diguanyl       |              | Signal transduction / other regulatory f | 11.563 | 10.986 | 13.387 | 12.097 | 3.05E-01 | 8.45E-03 | -0.58 | -1.29 |
| <i>lpg0278</i> | sensor histidine kinase (two component response regulat <i>fixL</i>     |              | Signal transduction / other regulatory f | 8.598  | 8.069  | 10.428 | 7.876  | 3.72E-01 | 4.92E-02 | -0.53 | -2.55 |
| <i>lpg0278</i> | sensor histidine kinase (two component response regulat <i>fixL</i>     |              | Signal transduction / other regulatory f | 9.423  | 9.388  | 11.556 | 9.906  | 9.35E-01 | 8.60E-03 | -0.03 | -1.65 |
| <i>lpg0279</i> | hypothetical                                                            |              | Unknown / hypothetical proteins          | 8.268  | 8.099  | 11.370 | 8.949  | 8.60E-01 | 1.04E-02 | -0.17 | -2.42 |
| <i>lpg0279</i> | hypothetical                                                            |              | Unknown / hypothetical proteins          | 8.182  | 9.372  | 11.299 | 9.548  | 2.07E-01 | 1.13E-01 | 1.19  | -1.75 |
| <i>lpg0280</i> | transcriptional regulator, LysR family                                  |              | Transcription factors / DNA binding prc  | 9.125  | 9.953  | 11.299 | 9.727  | 1.57E-01 | 6.05E-03 | 0.83  | -1.57 |
| <i>lpg0280</i> | transcriptional regulator, LysR family                                  |              | Transcription factors / DNA binding prc  | 9.211  | 9.995  | 11.254 | 9.818  | 1.70E-01 | 1.34E-02 | 0.78  | -1.44 |
| <i>lpg0281</i> | (cationic) amino acid transporter (permease)                            |              | Transport and binding                    | 10.230 | 9.919  | 11.382 | 9.373  | 6.09E-01 | 2.83E-02 | -0.31 | -2.01 |
| <i>lpg0281</i> | (cationic) amino acid transporter (permease)                            |              | Transport and binding                    | 10.036 | 9.472  | 10.943 | 9.386  | 3.64E-01 | 1.97E-02 | -0.56 | -1.56 |
| <i>lpg0282</i> | conserved hypothetical protein                                          |              | Unknown / hypothetical proteins          | 11.601 | 11.670 | 10.929 | 11.487 | 6.88E-01 | 3.71E-02 | 0.07  | 0.56  |
| <i>lpg0282</i> | conserved hypothetical protein                                          |              | Unknown / hypothetical proteins          | 11.296 | 11.730 | 10.638 | 11.630 | 3.72E-01 | 9.23E-03 | 0.43  | 0.99  |
| <i>lpg0283</i> | NAD dependent formate dehydrogenase                                     |              | Carbohydrate Metabolism, Energy Me       | 10.977 | 10.959 | 12.078 | 11.157 | 9.84E-01 | 2.99E-01 | -0.02 | -0.92 |
| <i>lpg0283</i> | NAD dependent formate dehydrogenase                                     |              | Carbohydrate Metabolism, Energy Me       | 11.015 | 11.489 | 12.194 | 11.755 | 3.37E-01 | 2.87E-01 | 0.47  | -0.44 |
| <i>lpg0284</i> | ORF                                                                     | <i>ceg10</i> | ORFs of unknown function (unique)        | 9.165  | 9.472  | 9.733  | 9.294  | 3.45E-01 | 2.45E-01 | 0.31  | -0.44 |
| <i>lpg0284</i> | ORF                                                                     | <i>ceg10</i> | ORFs of unknown function (unique)        | 8.926  | 9.397  | 9.338  | 9.180  | 1.20E-01 | 6.89E-01 | 0.47  | -0.16 |
| <i>lpg0285</i> | ORF                                                                     |              | ORFs of unknown function (unique)        | 10.975 | 12.458 | 10.895 | 12.331 | 4.64E-04 | 2.50E-03 | 1.48  | 1.44  |
| <i>lpg0285</i> | ORF                                                                     |              | ORFs of unknown function (unique)        | 11.173 | 12.653 | 11.077 | 13.208 | 4.15E-03 | 2.42E-03 | 1.48  | 2.13  |
| <i>lpg0286</i> | oxidoreductase, short chain dehydrogenase/reductase family              |              | Named proteins of general function       | 11.432 | 12.298 | 11.438 | 12.226 | 6.86E-04 | 3.75E-03 | 0.87  | 0.79  |
| <i>lpg0286</i> | oxidoreductase, short chain dehydrogenase/reductase family              |              | Named proteins of general function       | 11.343 | 12.246 | 11.338 | 12.268 | 9.05E-04 | 2.52E-03 | 0.90  | 0.93  |
| <i>lpg0287</i> | translation elongation factor P (EF-P)                                  | <i>efp</i>   | Translation                              | 9.799  | 12.091 | 9.519  | 11.961 | 1.96E-03 | 7.39E-04 | 2.29  | 2.44  |
| <i>lpg0287</i> | translation elongation factor P (EF-P)                                  | <i>efp</i>   | Translation                              | 9.781  | 11.947 | 8.452  | 11.834 | 9.55E-03 | 1.60E-02 | 2.17  | 3.38  |

|                |                                                                         |             |                                           |        |        |        |        |          |          |       |       |
|----------------|-------------------------------------------------------------------------|-------------|-------------------------------------------|--------|--------|--------|--------|----------|----------|-------|-------|
| <i>lpg0288</i> | L-lysine 2,3-aminomutase (radical SAM domain protein)                   |             | Amino Acid Metabolism                     | 10.390 | 9.884  | 10.339 | 11.588 | 1.81E-01 | 1.25E-02 | -0.51 | 1.25  |
| <i>lpg0288</i> | L-lysine 2,3-aminomutase (radical SAM domain protein)                   |             | Amino Acid Metabolism                     | 10.499 | 9.864  | 9.060  | 11.242 | 3.78E-02 | 6.78E-02 | -0.64 | 2.18  |
| <i>lpg0289</i> | polyphosphate kinase (polyphosphoric acid kinase)                       | <i>ppk</i>  | Energy Metabolism                         | 10.969 | 9.242  | 9.578  | 9.003  | 5.73E-04 | 1.91E-01 | -1.73 | -0.58 |
| <i>lpg0289</i> | polyphosphate kinase (polyphosphoric acid kinase)                       | <i>ppk</i>  | Energy Metabolism                         | 10.878 | 9.181  | 9.973  | 10.062 | 1.53E-03 | 8.51E-01 | -1.70 | 0.09  |
| <i>lpg0290</i> | lipoprotein                                                             |             | Named proteins of general function        | 8.794  | 8.947  | 7.794  | 8.579  | 6.31E-01 | 3.78E-01 | 0.15  | 0.79  |
| <i>lpg0290</i> | lipoprotein                                                             |             | Named proteins of general function        | 7.636  | 10.113 | 7.599  | 9.425  | 9.93E-02 | 3.02E-01 | 2.48  | 1.83  |
| <i>lpg0291</i> | chromate transport protein                                              |             | Transport and binding                     | 10.873 | 9.547  | 9.409  | 9.433  | 2.24E-02 | 9.56E-01 | -1.33 | 0.02  |
| <i>lpg0291</i> | chromate transport protein                                              |             | Transport and binding                     | 10.595 | 8.984  | 8.718  | 9.724  | 2.00E-02 | 3.96E-01 | -1.61 | 1.01  |
| <i>lpg0292</i> | ORF                                                                     |             | ORFs of unknown function (unique)         | 11.169 | 11.224 | 9.226  | 10.740 | 8.45E-01 | 2.46E-03 | 0.05  | 1.51  |
| <i>lpg0292</i> | ORF                                                                     |             | ORFs of unknown function (unique)         | 10.794 | 10.678 | 8.796  | 10.800 | 8.48E-01 | 3.78E-03 | -0.12 | 2.00  |
| <i>lpg0293</i> | long chain acyl-CoA dehydrogenase (oxidoreductase, acyl CoA-dehyd       |             | Lipid Metabolism, Metabolism of Com       | 11.804 | 11.850 | 11.099 | 10.919 | 8.52E-01 | 3.50E-01 | 0.05  | -0.18 |
| <i>lpg0293</i> | long chain acyl-CoA dehydrogenase (oxidoreductase, acyl CoA-dehyd       |             | Lipid Metabolism, Metabolism of Com       | 11.674 | 11.939 | 10.939 | 10.873 | 4.00E-01 | 8.11E-01 | 0.26  | -0.07 |
| <i>lpg0294</i> | ORF                                                                     |             | ORFs of unknown function (unique)         | 12.161 | 12.234 | 12.688 | 11.930 | 9.23E-01 | 9.85E-02 | 0.07  | -0.76 |
| <i>lpg0294</i> | ORF                                                                     |             | ORFs of unknown function (unique)         | 12.201 | 12.878 | 12.621 | 12.093 | 7.50E-02 | 2.17E-01 | 0.68  | -0.53 |
| <i>lpg0295</i> | mannose-1-phosphate guanyltransferase (sugar phosphate nucleotid        |             | Carbohydrate Metabolism                   | 9.983  | 11.568 | 9.065  | 10.996 | 8.12E-02 | 3.61E-02 | 1.58  | 1.93  |
| <i>lpg0295</i> | mannose-1-phosphate guanyltransferase (sugar phosphate nucleotid        |             | Carbohydrate Metabolism                   | 9.931  | 11.757 | 9.220  | 11.996 | 5.18E-02 | 3.01E-03 | 1.83  | 2.78  |
| <i>lpg0296</i> | (phosphotransferase) hypothetical                                       |             | Named proteins of general function        | 9.049  | 10.463 | 7.746  | 11.236 | 8.23E-02 | 2.04E-03 | 1.41  | 3.49  |
| <i>lpg0296</i> | (phosphotransferase) hypothetical                                       |             | Named proteins of general function        | 9.848  | 10.364 | 7.052  | 11.138 | 2.32E-02 | 3.63E-03 | 0.52  | 4.09  |
| <i>lpg0297</i> | organic solvent tolerance protein                                       | <i>ostA</i> | Detoxification / adaptation               | 10.854 | 9.327  | 8.450  | 11.231 | 9.01E-02 | 7.21E-03 | -1.53 | 2.78  |
| <i>lpg0297</i> | organic solvent tolerance protein                                       | <i>ostA</i> | Detoxification / adaptation               | 10.698 | 10.000 | 7.875  | 11.106 | 5.12E-01 | 1.51E-02 | -0.70 | 3.23  |
| <i>lpg0298</i> | peptidyl-prolyl cis-trans isomerase D (survival protein Sui <i>surA</i> |             | Toxin production / other pathogen func    | 12.687 | 12.978 | 12.970 | 13.796 | 9.30E-01 | 5.20E-02 | 0.11  | 0.83  |
| <i>lpg0298</i> | peptidyl-prolyl cis-trans isomerase D (survival protein Sui <i>surA</i> |             | Toxin production / other pathogen func    | 12.636 | 13.922 | 12.881 | 13.740 | 4.37E-04 | 4.97E-02 | 1.29  | 0.86  |
| <i>lpg0299</i> | pyridoxal phosphate biosynthetic protein PdxA (4-hydroxyl <i>pdxA</i>   |             | Metabolism of Cofactors and Vitamins      | 10.994 | 10.569 | 9.826  | 11.206 | 2.01E-01 | 7.07E-03 | -0.43 | 1.38  |
| <i>lpg0299</i> | pyridoxal phosphate biosynthetic protein PdxA (4-hydroxyl <i>pdxA</i>   |             | Metabolism of Cofactors and Vitamins      | 11.010 | 10.604 | 9.630  | 11.059 | 1.17E-01 | 2.20E-02 | -0.41 | 1.43  |
| <i>lpg0300</i> | dihydrofolate reductase                                                 |             | Metabolism of Cofactors and Vitamins      | 11.516 | 11.339 | 10.351 | 11.948 | 7.16E-01 | 2.10E-04 | -0.18 | 1.60  |
| <i>lpg0300</i> | dihydrofolate reductase                                                 |             | Metabolism of Cofactors and Vitamins      | 11.557 | 11.360 | 10.170 | 11.940 | 5.09E-01 | 1.22E-04 | -0.20 | 1.77  |
| <i>lpg0301</i> | hypothetical (insect protein?) (CG13321 gene product)                   |             | Unknown / hypothetical proteins           | 11.508 | 13.219 | 12.027 | 12.822 | 9.02E-04 | 1.34E-01 | 1.71  | 0.80  |
| <i>lpg0301</i> | hypothetical (insect protein?) (CG13321 gene product)                   |             | Unknown / hypothetical proteins           | 11.544 | 13.255 | 11.904 | 12.936 | 2.19E-03 | 4.27E-02 | 1.71  | 1.03  |
| <i>lpg0302</i> | 16S rRNA                                                                |             | rRNA                                      | 15.292 | 15.744 | 15.685 | 15.629 | 1.37E-01 | 4.48E-01 | 0.45  | -0.06 |
| <i>lpg0302</i> | 16S rRNA                                                                |             | rRNA                                      | 15.118 | 15.600 | 15.664 | 15.623 | 1.17E-01 | 6.85E-01 | 0.48  | -0.04 |
| <i>lpg0303</i> | tRNA-Ala                                                                |             | tRNA                                      | 12.745 | 13.280 | 12.064 | 13.974 | 1.62E-01 | 5.12E-04 | 0.54  | 1.91  |
| <i>lpg0303</i> | tRNA-Ala                                                                |             | tRNA                                      | 12.660 | 13.316 | 12.010 | 13.971 | 1.56E-01 | 6.25E-04 | 0.66  | 1.96  |
| <i>lpg0304</i> | 23S rRNA                                                                |             | rRNA                                      | 14.636 | 13.103 | 15.455 | 13.282 | 3.82E-01 | 2.02E-01 | -1.53 | -2.17 |
| <i>lpg0304</i> | 23S rRNA                                                                |             | rRNA                                      | 14.853 | 14.174 | 15.555 | 13.769 | 6.18E-01 | 1.83E-01 | -0.68 | -1.79 |
| <i>lpg0305</i> | ; lpg0572; lpg2751; ORF hypothetical (transposase?) global transcrip    |             | Detoxification / adaptation, Transcriptic | 6.909  | 8.298  | 7.641  | 8.598  | 3.51E-01 | 3.88E-01 | 1.39  | 0.96  |
| <i>lpg0305</i> | ; lpg0572; lpg2751; ORF hypothetical (transposase?) global transcrip    |             | Detoxification / adaptation, Transcriptic | 7.276  | 9.407  | 7.660  | 9.406  | 1.79E-02 | 1.92E-01 | 2.13  | 1.75  |
| <i>lpg0306</i> | ORF                                                                     |             | ORFs of unknown function (unique)         | 6.529  | 8.612  | 8.814  | 8.348  | 1.33E-01 | 7.14E-01 | 2.08  | -0.47 |
| <i>lpg0306</i> | ORF                                                                     |             | ORFs of unknown function (unique)         | 6.807  | 8.668  | 8.588  | 8.352  | 2.67E-01 | 8.40E-01 | 1.86  | -0.24 |
| <i>lpg0307</i> | hypothetical protein                                                    |             | Unknown / hypothetical proteins           | 9.299  | 9.530  | 9.654  | 9.455  | 7.74E-01 | 8.27E-01 | 0.23  | -0.20 |
| <i>lpg0307</i> | hypothetical protein                                                    |             | Unknown / hypothetical proteins           | 8.316  | 9.547  | 8.802  | 10.072 | 2.32E-01 | 1.74E-01 | 1.23  | 1.27  |
| <i>lpg0308</i> | cell wall associated hydrolase, putative pseudogene                     |             | Named proteins of general function        | 10.681 | 13.314 | 12.643 | 13.211 | 2.00E-03 | 1.27E-01 | 2.63  | 0.57  |
| <i>lpg0308</i> | cell wall associated hydrolase, putative pseudogene                     |             | Named proteins of general function        | 10.759 | 13.382 | 12.600 | 13.230 | 2.14E-03 | 1.24E-01 | 2.62  | 0.63  |
| <i>lpg0309</i> | 5S rRNA                                                                 |             | rRNA                                      | 15.659 | 14.544 | 15.732 | 13.049 | 3.50E-01 | 2.82E-01 | -1.11 | -2.68 |
| <i>lpg0309</i> | 5S rRNA                                                                 |             | rRNA                                      | 15.624 | 14.505 | 15.685 | 13.507 | 3.84E-01 | 1.92E-01 | -1.12 | -2.18 |
| <i>lpg0310</i> | tRNA-Thr                                                                |             | tRNA                                      | 13.429 | 11.643 | 11.029 | 12.886 | 3.33E-02 | 7.70E-02 | -1.79 | 1.86  |
| <i>lpg0310</i> | tRNA-Thr                                                                |             | tRNA                                      | 13.189 | 11.505 | 11.071 | 13.057 | 1.05E-01 | 3.81E-02 | -1.68 | 1.99  |
| <i>lpg0311</i> | tRNA-Tyr                                                                |             | tRNA                                      | 12.756 | 12.804 | 10.302 | 14.469 | 9.59E-01 | 3.72E-04 | 0.05  | 4.17  |
| <i>lpg0311</i> | tRNA-Tyr                                                                |             | tRNA                                      | 12.931 | 12.793 | 10.182 | 14.476 | 8.51E-01 | 3.99E-04 | -0.14 | 4.29  |
| <i>lpg0312</i> | tRNA-Gly                                                                |             | tRNA                                      | 14.098 | 14.265 | 11.197 | 15.447 | 8.13E-01 | 2.04E-04 | 0.17  | 4.25  |
| <i>lpg0312</i> | tRNA-Gly                                                                |             | tRNA                                      | 14.100 | 14.274 | 10.920 | 15.410 | 7.80E-01 | 5.60E-04 | 0.17  | 4.49  |
| <i>lpg0313</i> | tRNA-Thr                                                                |             | tRNA                                      | 14.102 | 13.927 | 12.153 | 14.545 | 9.00E-01 | 7.86E-02 | -0.18 | 2.39  |
| <i>lpg0313</i> | tRNA-Thr                                                                |             | tRNA                                      | 14.035 | 14.616 | 11.966 | 15.267 | 4.79E-01 | 3.88E-03 | 0.58  | 3.30  |
| <i>lpg0314</i> | elongation factor Tu (EF-Tu)                                            | <i>tuf2</i> | Translation                               | 14.907 | 15.378 | 13.461 | 15.645 | 3.58E-01 | 2.37E-03 | 0.47  | 2.18  |
| <i>lpg0314</i> | elongation factor Tu (EF-Tu)                                            | <i>tuf2</i> | Translation                               | 14.778 | 15.322 | 13.167 | 15.694 | 4.22E-01 | 2.58E-07 | 0.54  | 2.53  |
| <i>lpg0315</i> | tRNA-Trp                                                                |             | tRNA                                      | 13.206 | 12.285 | 11.027 | 13.237 | 4.97E-01 | 1.14E-01 | -0.92 | 2.21  |
| <i>lpg0315</i> | tRNA-Trp                                                                |             | tRNA                                      | 13.546 | 13.336 | 10.762 | 13.323 | 7.88E-01 | 7.48E-02 | -0.21 | 2.56  |
| <i>lpg0316</i> | preprotein translocase, SecE subunit                                    | <i>secE</i> | Protein fate / hydrolases / secretion     | 14.086 | 13.257 | 10.785 | 14.080 | 1.80E-01 | 3.04E-03 | -0.83 | 3.29  |
| <i>lpg0316</i> | preprotein translocase, SecE subunit                                    | <i>secE</i> | Protein fate / hydrolases / secretion     | 14.011 | 13.345 | 10.786 | 14.188 | 2.68E-01 | 3.39E-03 | -0.67 | 3.40  |
| <i>lpg0317</i> | transcription antitermination protein NusG                              | <i>nusG</i> | Transcription                             | 12.999 | 12.435 | 10.355 | 13.320 | 4.98E-01 | 3.52E-03 | -0.56 | 2.97  |
| <i>lpg0317</i> | transcription antitermination protein NusG                              | <i>nusG</i> | Transcription                             | 13.156 | 12.420 | 10.201 | 13.256 | 2.48E-01 | 3.28E-03 | -0.74 | 3.05  |
| <i>lpg0318</i> | 50S ribosomal protein L11                                               | <i>rplK</i> | Translation                               | 13.127 | 12.243 | 11.207 | 13.417 | 2.75E-01 | 9.44E-03 | -0.88 | 2.21  |
| <i>lpg0318</i> | 50S ribosomal protein L11                                               | <i>rplK</i> | Translation                               | 13.244 | 12.010 | 11.022 | 13.331 | 6.20E-02 | 1.07E-02 | -1.23 | 2.31  |
| <i>lpg0319</i> | 50S ribosomal protein L1                                                | <i>rplA</i> | Translation                               | 13.492 | 12.477 | 11.497 | 13.419 | 1.34E-02 | 9.87E-03 | -1.01 | 1.92  |
| <i>lpg0319</i> | 50S ribosomal protein L1                                                | <i>rplA</i> | Translation                               | 12.894 | 12.478 | 11.568 | 13.504 | 5.71E-01 | 1.06E-02 | -0.42 | 1.94  |

|                |                                                 |             |                                       |        |        |        |        |          |          |       |      |
|----------------|-------------------------------------------------|-------------|---------------------------------------|--------|--------|--------|--------|----------|----------|-------|------|
| <i>lpg0320</i> | 50S ribosomal protein L10                       | <i>rpJ</i>  | Translation                           | 14.565 | 14.904 | 12.391 | 15.491 | 6.25E-01 | 1.06E-02 | 0.34  | 3.10 |
| <i>lpg0320</i> | 50S ribosomal protein L10                       | <i>rpJ</i>  | Translation                           | 14.779 | 14.861 | 12.147 | 15.529 | 9.17E-01 | 2.69E-03 | 0.08  | 3.38 |
| <i>lpg0321</i> | 50S ribosomal protein L7/L12                    | <i>rpL</i>  | Translation                           | 12.720 | 13.319 | 10.375 | 14.503 | 5.20E-01 | 8.31E-04 | 0.60  | 4.13 |
| <i>lpg0321</i> | 50S ribosomal protein L7/L12                    | <i>rpL</i>  | Translation                           | 12.700 | 13.357 | 9.589  | 14.526 | 4.97E-01 | 3.24E-03 | 0.66  | 4.94 |
| <i>lpg0322</i> | DNA-directed RNA polymerase beta subunit        | <i>rpoB</i> | Transcription                         | 14.354 | 13.126 | 13.136 | 13.509 | 7.79E-03 | 2.77E-01 | -1.23 | 0.37 |
| <i>lpg0322</i> | DNA-directed RNA polymerase beta subunit        | <i>rpoB</i> | Transcription                         | 14.129 | 13.166 | 13.132 | 13.529 | 5.56E-03 | 2.35E-01 | -0.96 | 0.40 |
| <i>lpg0323</i> | DNA-directed RNA polymerase beta' subunit       | <i>rpoC</i> | Transcription                         | 14.224 | 13.312 | 13.307 | 14.176 | 2.09E-02 | 1.33E-02 | -0.91 | 0.87 |
| <i>lpg0323</i> | DNA-directed RNA polymerase beta' subunit       | <i>rpoC</i> | Transcription                         | 14.000 | 13.252 | 13.233 | 14.136 | 2.05E-02 | 1.19E-02 | -0.75 | 0.90 |
| <i>lpg0324</i> | 30S ribosomal protein S12                       |             | Translation                           | 14.736 | 13.793 | 13.501 | 14.811 | 1.77E-02 | 1.21E-02 | -0.94 | 1.31 |
| <i>lpg0324</i> | 30S ribosomal protein S12                       |             | Translation                           | 15.004 | 13.836 | 13.380 | 14.877 | 2.52E-05 | 2.58E-04 | -1.17 | 1.50 |
| <i>lpg0325</i> | 30S ribosomal protein S7                        | <i>rpS7</i> | Translation                           | 14.365 | 13.765 | 13.090 | 15.097 | 2.84E-01 | 1.15E-03 | -0.60 | 2.01 |
| <i>lpg0325</i> | 30S ribosomal protein S7                        | <i>rpS7</i> | Translation                           | 14.248 | 13.787 | 13.090 | 15.111 | 3.33E-01 | 2.50E-03 | -0.46 | 2.02 |
| <i>lpg0326</i> | translation elongation factor G (EF-G)          | <i>fusA</i> | Translation                           | 15.043 | 14.520 | 13.651 | 15.578 | 1.85E-01 | 7.54E-04 | -0.52 | 1.93 |
| <i>lpg0326</i> | translation elongation factor G (EF-G)          | <i>fusA</i> | Translation                           | 15.166 | 14.505 | 13.599 | 15.577 | 7.77E-02 | 3.78E-04 | -0.66 | 1.98 |
| <i>lpg0328</i> | 30S ribosomal protein S10                       | <i>rpsJ</i> | Translation                           | 13.008 | 13.344 | 11.217 | 14.474 | 6.93E-01 | 1.44E-03 | 0.34  | 3.26 |
| <i>lpg0328</i> | 30S ribosomal protein S10                       | <i>rpsJ</i> | Translation                           | 13.027 | 13.341 | 11.028 | 14.496 | 6.91E-01 | 2.64E-03 | 0.31  | 3.47 |
| <i>lpg0329</i> | 50S ribosomal protein L3                        | <i>rpI</i>  | Translation                           | 14.813 | 14.281 | 12.671 | 15.093 | 3.62E-01 | 5.35E-03 | -0.53 | 2.42 |
| <i>lpg0329</i> | 50S ribosomal protein L3                        | <i>rpI</i>  | Translation                           | 14.622 | 14.233 | 12.478 | 15.086 | 5.42E-01 | 1.40E-03 | -0.39 | 2.61 |
| <i>lpg0330</i> | 50S ribosomal protein L4                        |             | Translation                           | 6.876  | 8.365  | 7.092  | 7.620  | 5.34E-02 | 7.00E-01 | 1.49  | 0.53 |
| <i>lpg0330</i> | 50S ribosomal protein L4                        |             | Translation                           | 6.505  | 6.788  | 6.676  | 7.526  | 8.71E-01 | 6.04E-01 | 0.28  | 0.85 |
| <i>lpg0331</i> | 50S ribosomal protein L23                       | <i>rpI</i>  | Translation                           | 14.328 | 12.526 | 12.835 | 13.445 | 2.49E-02 | 3.04E-01 | -1.80 | 0.61 |
| <i>lpg0331</i> | 50S ribosomal protein L23                       | <i>rpI</i>  | Translation                           | 14.223 | 12.473 | 12.854 | 13.497 | 3.21E-02 | 3.20E-01 | -1.75 | 0.64 |
| <i>lpg0332</i> | 50S ribosomal protein L2                        |             | Translation                           | 14.324 | 11.842 | 12.473 | 13.225 | 2.86E-02 | 4.57E-01 | -2.48 | 0.75 |
| <i>lpg0332</i> | 50S ribosomal protein L2                        |             | Translation                           | 14.292 | 12.107 | 12.536 | 13.544 | 1.62E-02 | 2.38E-01 | -2.19 | 1.01 |
| <i>lpg0333</i> | hypothetical?                                   |             | Unknown / hypothetical proteins       | 10.480 | 11.345 | 9.643  | 11.661 | 2.12E-01 | 2.33E-02 | 0.86  | 2.02 |
| <i>lpg0333</i> | hypothetical?                                   |             | Unknown / hypothetical proteins       | 10.356 | 11.087 | 9.902  | 12.573 | 3.12E-01 | 8.18E-03 | 0.73  | 2.67 |
| <i>lpg0334</i> | 50S ribosomal protein L22                       | <i>rpI</i>  | Translation                           | 14.770 | 13.272 | 12.604 | 14.691 | 1.87E-02 | 1.09E-02 | -1.50 | 2.09 |
| <i>lpg0334</i> | 50S ribosomal protein L22                       | <i>rpI</i>  | Translation                           | 14.559 | 13.251 | 12.505 | 14.664 | 2.99E-02 | 8.09E-03 | -1.31 | 2.16 |
| <i>lpg0335</i> | 30S ribosomal protein S3                        | <i>rpsC</i> | Translation                           | 14.644 | 13.321 | 12.548 | 14.796 | 3.34E-02 | 2.13E-03 | -1.32 | 2.25 |
| <i>lpg0335</i> | 30S ribosomal protein S3                        | <i>rpsC</i> | Translation                           | 14.822 | 13.346 | 12.457 | 14.799 | 2.59E-02 | 2.17E-03 | -1.48 | 2.34 |
| <i>lpg0336</i> | 50S ribosomal protein L16/(L10E)                | <i>rpI</i>  | Translation                           | 14.678 | 14.587 | 13.078 | 15.080 | 8.68E-01 | 4.33E-03 | -0.09 | 2.00 |
| <i>lpg0336</i> | 50S ribosomal protein L16/(L10E)                | <i>rpI</i>  | Translation                           | 14.804 | 14.371 | 12.621 | 15.131 | 4.64E-01 | 5.97E-07 | -0.43 | 2.51 |
| <i>lpg0337</i> | 50S ribosomal subunit protein L29               | <i>rpmC</i> | Translation                           | 13.866 | 12.189 | 12.217 | 13.161 | 7.39E-02 | 2.59E-01 | -1.68 | 0.94 |
| <i>lpg0337</i> | 50S ribosomal subunit protein L29               | <i>rpmC</i> | Translation                           | 13.929 | 12.048 | 11.969 | 12.974 | 6.94E-02 | 1.95E-01 | -1.88 | 1.01 |
| <i>lpg0338</i> | 30S ribosomal protein S17                       | <i>rpsQ</i> | Translation                           | 13.592 | 12.120 | 11.752 | 12.297 | 8.40E-02 | 6.09E-01 | -1.47 | 0.54 |
| <i>lpg0338</i> | 30S ribosomal protein S17                       | <i>rpsQ</i> | Translation                           | 13.677 | 12.664 | 11.816 | 13.506 | 2.18E-01 | 5.01E-02 | -1.01 | 1.69 |
| <i>lpg0339</i> | 50S ribosomal protein L14                       | <i>rpI</i>  | Translation                           | 14.618 | 13.110 | 12.728 | 14.460 | 3.20E-02 | 1.92E-02 | -1.51 | 1.73 |
| <i>lpg0339</i> | 50S ribosomal protein L14                       | <i>rpI</i>  | Translation                           | 14.705 | 13.162 | 12.684 | 14.497 | 2.85E-02 | 1.08E-02 | -1.54 | 1.81 |
| <i>lpg0340</i> | 50S ribosomal protein L24                       | <i>rpI</i>  | Translation                           | 14.579 | 12.253 | 12.163 | 13.149 | 2.27E-02 | 5.20E-01 | -2.33 | 0.99 |
| <i>lpg0340</i> | 50S ribosomal protein L24                       | <i>rpI</i>  | Translation                           | 14.828 | 12.645 | 12.038 | 13.823 | 7.11E-03 | 9.14E-02 | -2.18 | 1.78 |
| <i>lpg0341</i> | 50S ribosomal protein L5                        |             | Translation                           | 14.595 | 12.381 | 11.625 | 13.976 | 2.83E-02 | 6.30E-02 | -2.21 | 2.35 |
| <i>lpg0341</i> | 50S ribosomal protein L5                        |             | Translation                           | 14.732 | 12.786 | 11.630 | 14.290 | 2.31E-02 | 1.41E-02 | -1.95 | 2.66 |
| <i>lpg0342</i> | 30S ribosomal protein S14                       | <i>rpsN</i> | Translation                           | 14.685 | 13.109 | 12.395 | 14.986 | 2.23E-02 | 2.28E-03 | -1.58 | 2.59 |
| <i>lpg0342</i> | 30S ribosomal protein S14                       | <i>rpsN</i> | Translation                           | 14.779 | 13.080 | 12.212 | 15.007 | 1.66E-02 | 5.56E-04 | -1.70 | 2.80 |
| <i>lpg0343</i> | 30S ribosomal protein S8                        | <i>rpsH</i> | Translation                           | 14.310 | 13.866 | 12.508 | 15.426 | 5.15E-01 | 5.05E-04 | -0.44 | 2.92 |
| <i>lpg0343</i> | 30S ribosomal protein S8                        | <i>rpsH</i> | Translation                           | 14.765 | 13.860 | 12.426 | 15.439 | 1.57E-01 | 2.29E-04 | -0.91 | 3.01 |
| <i>lpg0344</i> | 50S ribosomal protein L6/(L9E)                  | <i>rpI</i>  | Translation                           | 14.006 | 13.925 | 12.263 | 15.062 | 9.13E-01 | 1.58E-03 | -0.08 | 2.80 |
| <i>lpg0344</i> | 50S ribosomal protein L6/(L9E)                  | <i>rpI</i>  | Translation                           | 14.366 | 13.711 | 12.015 | 15.043 | 3.62E-01 | 1.63E-03 | -0.65 | 3.03 |
| <i>lpg0345</i> | 50S ribosomal protein L18                       | <i>rpI</i>  | Translation                           | 14.534 | 13.563 | 12.198 | 14.287 | 4.06E-01 | 9.58E-02 | -0.97 | 2.09 |
| <i>lpg0345</i> | 50S ribosomal protein L18                       | <i>rpI</i>  | Translation                           | 14.526 | 14.249 | 12.364 | 15.077 | 7.28E-01 | 2.09E-03 | -0.28 | 2.71 |
| <i>lpg0346</i> | 30S ribosomal protein S5                        | <i>rpsE</i> | Translation                           | 14.903 | 14.793 | 13.097 | 15.438 | 8.13E-01 | 2.11E-03 | -0.11 | 2.34 |
| <i>lpg0346</i> | 30S ribosomal protein S5                        | <i>rpsE</i> | Translation                           | 14.634 | 14.778 | 13.025 | 15.370 | 7.70E-01 | 3.29E-03 | 0.14  | 2.35 |
| <i>lpg0347</i> | 50S ribosomal protein L30/(L7E)                 | <i>rpmD</i> | Translation                           | 14.808 | 12.181 | 11.935 | 12.701 | 7.86E-03 | 5.02E-01 | -2.63 | 0.77 |
| <i>lpg0347</i> | 50S ribosomal protein L30/(L7E)                 | <i>rpmD</i> | Translation                           | 14.576 | 12.726 | 12.469 | 13.386 | 1.17E-02 | 2.67E-01 | -1.85 | 0.92 |
| <i>lpg0348</i> | 50S ribosomal protein L15                       | <i>rpI</i>  | Translation                           | 14.434 | 11.737 | 11.715 | 13.621 | 2.24E-02 | 5.21E-02 | -2.70 | 1.91 |
| <i>lpg0348</i> | 50S ribosomal protein L15                       | <i>rpI</i>  | Translation                           | 14.029 | 12.226 | 10.736 | 13.072 | 7.12E-02 | 4.80E-03 | -1.80 | 2.34 |
| <i>lpg0349</i> | preprotein translocase (secretion protein SecY) | <i>secY</i> | Protein fate / hydrolases / secretion | 14.407 | 12.349 | 11.768 | 13.077 | 1.61E-02 | 1.20E-01 | -2.06 | 1.31 |
| <i>lpg0349</i> | preprotein translocase (secretion protein SecY) | <i>secY</i> | Protein fate / hydrolases / secretion | 14.472 | 11.585 | 11.091 | 13.101 | 2.31E-03 | 5.77E-02 | -2.89 | 2.01 |
| <i>lpg0350</i> | 50S ribosomal protein L36                       | <i>rpmJ</i> | Translation                           | 12.685 | 10.294 | 9.332  | 12.153 | 5.81E-02 | 8.40E-03 | -2.39 | 2.82 |
| <i>lpg0350</i> | 50S ribosomal protein L36                       | <i>rpmJ</i> | Translation                           | 12.575 | 11.020 | 8.197  | 12.263 | 3.33E-02 | 1.08E-02 | -1.56 | 4.07 |
| <i>lpg0351</i> | 30S ribosomal protein S13                       | <i>rpsM</i> | Translation                           | 14.713 | 13.601 | 12.761 | 14.297 | 9.04E-02 | 3.63E-02 | -1.11 | 1.54 |
| <i>lpg0351</i> | 30S ribosomal protein S13                       | <i>rpsM</i> | Translation                           | 14.703 | 13.622 | 12.774 | 14.353 | 6.46E-02 | 2.75E-02 | -1.08 | 1.58 |
| <i>lpg0352</i> | 30S ribosomal protein S11                       | <i>rpsK</i> | Translation                           | 14.502 | 13.574 | 12.046 | 14.881 | 2.14E-01 | 7.70E-04 | -0.93 | 2.84 |
| <i>lpg0352</i> | 30S ribosomal protein S11                       | <i>rpsK</i> | Translation                           | 14.693 | 13.556 | 11.974 | 14.865 | 1.20E-01 | 1.14E-03 | -1.14 | 2.89 |

|                |                                                                         |             |                                          |        |        |        |        |          |          |       |       |
|----------------|-------------------------------------------------------------------------|-------------|------------------------------------------|--------|--------|--------|--------|----------|----------|-------|-------|
| <i>lpg0353</i> | 30S ribosomal protein S4                                                | <i>rpsD</i> | Translation                              | 14.561 | 13.823 | 12.439 | 14.708 | 3.92E-01 | 9.46E-03 | -0.74 | 2.27  |
| <i>lpg0353</i> | 30S ribosomal protein S4                                                | <i>rpsD</i> | Translation                              | 14.492 | 14.291 | 12.428 | 15.113 | 7.22E-01 | 1.17E-03 | -0.20 | 2.69  |
| <i>lpg0354</i> | DNA-directed RNA polymerase alpha subunit RpoA                          | <i>rpoA</i> | Transcription                            | 14.591 | 13.400 | 12.595 | 14.387 | 4.83E-02 | 1.33E-02 | -1.19 | 1.79  |
| <i>lpg0354</i> | DNA-directed RNA polymerase alpha subunit RpoA                          | <i>rpoA</i> | Transcription                            | 14.536 | 13.324 | 12.559 | 14.402 | 3.25E-02 | 1.89E-02 | -1.21 | 1.84  |
| <i>lpg0355</i> | 50S ribosomal protein L17                                               | <i>rplQ</i> | Translation                              | 11.728 | 11.075 | 9.819  | 11.414 | 4.59E-01 | 4.31E-02 | -0.65 | 1.59  |
| <i>lpg0355</i> | 50S ribosomal protein L17                                               | <i>rplQ</i> | Translation                              | 11.203 | 11.223 | 9.573  | 11.444 | 9.86E-01 | 2.89E-02 | 0.02  | 1.87  |
| <i>lpg0356</i> | single strand binding protein                                           | <i>ssb</i>  | Replication and Repair                   | 13.968 | 14.159 | 13.610 | 13.858 | 3.26E-01 | 1.48E-01 | 0.19  | 0.25  |
| <i>lpg0356</i> | single strand binding protein                                           | <i>ssb</i>  | Replication and Repair                   | 13.909 | 14.169 | 13.620 | 13.881 | 1.81E-01 | 1.49E-01 | 0.26  | 0.26  |
| <i>lpg0357</i> | major facilitator family transporter (multidrug efflux transporter)     |             | Transport and binding                    | 12.010 | 10.524 | 10.758 | 11.040 | 3.75E-03 | 4.20E-01 | -1.49 | 0.28  |
| <i>lpg0357</i> | major facilitator family transporter (multidrug efflux transporter)     |             | Transport and binding                    | 11.995 | 10.352 | 10.380 | 10.982 | 1.93E-03 | 3.69E-01 | -1.64 | 0.60  |
| <i>lpg0358</i> | glucose-1-dehydrogenase (1-cyclohexenylcarbonyl CoA reductase-sf        |             | Named proteins of general function       | 12.497 | 12.370 | 12.276 | 12.171 | 7.34E-01 | 6.22E-01 | -0.13 | -0.10 |
| <i>lpg0358</i> | glucose-1-dehydrogenase (1-cyclohexenylcarbonyl CoA reductase-sf        |             | Named proteins of general function       | 12.539 | 12.238 | 12.218 | 12.174 | 3.90E-01 | 8.57E-01 | -0.30 | -0.04 |
| <i>lpg0359</i> | acyl carrier protein                                                    | <i>acpP</i> | Named proteins of general function       | 12.959 | 11.850 | 10.127 | 12.728 | 1.49E-01 | 5.95E-03 | -1.11 | 2.60  |
| <i>lpg0359</i> | acyl carrier protein                                                    | <i>acpP</i> | Named proteins of general function       | 12.629 | 12.132 | 9.838  | 12.695 | 6.04E-01 | 8.96E-03 | -0.50 | 2.86  |
| <i>lpg0360</i> | 3-hydroxymyristoyl/3-hydroxydecanoyl-(acyl carrier prote                | <i>fabA</i> | Named proteins of general function       | 13.252 | 11.470 | 10.569 | 12.947 | 6.78E-02 | 1.98E-02 | -1.78 | 2.38  |
| <i>lpg0360</i> | 3-hydroxymyristoyl/3-hydroxydecanoyl-(acyl carrier prote                | <i>fabA</i> | Named proteins of general function       | 13.301 | 11.482 | 10.129 | 12.840 | 4.38E-02 | 3.21E-02 | -1.82 | 2.71  |
| <i>lpg0361</i> | 3-oxoacyl-[acyl-carrier protein] synthase II (beta-ketoacyl <i>fabF</i> |             | Lipid Metabolism                         | 11.865 | 11.364 | 10.126 | 12.120 | 4.00E-01 | 1.24E-02 | -0.50 | 1.99  |
| <i>lpg0361</i> | 3-oxoacyl-[acyl-carrier protein] synthase II (beta-ketoacyl <i>fabF</i> |             | Lipid Metabolism                         | 12.240 | 11.394 | 9.043  | 12.074 | 8.98E-02 | 1.05E-01 | -0.85 | 3.03  |
| <i>lpg0362</i> | 3-oxoacyl-[acyl-carrier protein] synthase II (beta-ketoacyl <i>fabF</i> |             | Lipid Metabolism                         | 11.980 | 9.215  | 10.379 | 10.877 | 3.17E-04 | 3.68E-01 | -2.77 | 0.50  |
| <i>lpg0362</i> | 3-oxoacyl-[acyl-carrier protein] synthase II (beta-ketoacyl <i>fabF</i> |             | Lipid Metabolism                         | 12.060 | 10.611 | 10.271 | 11.923 | 1.14E-01 | 9.38E-02 | -1.45 | 1.65  |
| <i>lpg0363</i> | lipid A biosynthesis acyltransferase (lauroyl/myristoyl acy <i>waam</i> |             | Metabolism of Complex Carbohydrate:      | 10.654 | 9.174  | 9.819  | 9.159  | 1.49E-03 | 3.47E-01 | -1.48 | -0.66 |
| <i>lpg0363</i> | lipid A biosynthesis acyltransferase (lauroyl/myristoyl acy <i>waam</i> |             | Metabolism of Complex Carbohydrate:      | 10.671 | 8.912  | 8.937  | 9.368  | 8.31E-04 | 6.31E-01 | -1.76 | 0.43  |
| <i>lpg0364</i> | small ORF (101aa)                                                       |             | ORFs of unknown function (unique)        | 11.733 | 11.685 | 12.464 | 10.860 | 8.86E-01 | 2.04E-02 | -0.05 | -1.60 |
| <i>lpg0364</i> | small ORF (101aa)                                                       |             | ORFs of unknown function (unique)        | 11.699 | 11.705 | 12.459 | 11.022 | 9.85E-01 | 1.70E-02 | 0.01  | -1.44 |
| <i>lpg0365</i> | ORF                                                                     |             | ORFs of unknown function (unique)        | 11.298 | 13.076 | 12.017 | 10.931 | 8.21E-05 | 2.48E-02 | 1.78  | -1.09 |
| <i>lpg0365</i> | ORF                                                                     |             | ORFs of unknown function (unique)        | 11.334 | 13.146 | 12.041 | 11.156 | 8.87E-05 | 3.61E-02 | 1.81  | -0.89 |
| <i>lpg0366</i> | diaminopimelate epimerase                                               | <i>dapF</i> | Amino Acid Metabolism                    | 11.364 | 11.662 | 10.990 | 11.689 | 2.53E-02 | 6.63E-02 | 0.30  | 0.70  |
| <i>lpg0366</i> | diaminopimelate epimerase                                               | <i>dapF</i> | Amino Acid Metabolism                    | 11.399 | 11.950 | 10.946 | 11.668 | 3.89E-02 | 1.09E-01 | 0.55  | 0.72  |
| <i>lpg0367</i> | anthranilate synthase component I segment?                              |             | Amino Acid Metabolism                    | 8.891  | 9.784  | 8.859  | 8.876  | 4.78E-01 | 9.81E-01 | 0.89  | 0.02  |
| <i>lpg0367</i> | anthranilate synthase component I segment?                              |             | Amino Acid Metabolism                    | 9.261  | 10.317 | 8.425  | 8.717  | 1.17E-01 | 7.05E-01 | 1.06  | 0.29  |
| <i>lpg0368</i> | ORF                                                                     |             | ORFs of unknown function (unique)        | 8.532  | 8.221  | 8.916  | 7.788  | 5.34E-01 | 3.35E-02 | -0.31 | -1.13 |
| <i>lpg0368</i> | ORF                                                                     |             | ORFs of unknown function (unique)        | 8.848  | 8.272  | 8.743  | 7.754  | 2.05E-01 | 2.96E-01 | -0.58 | -0.99 |
| <i>lpg0369</i> | carboxylesterase/phospholipase                                          |             | Protein fate / hydrolases / secretion    | 12.518 | 11.963 | 9.225  | 12.578 | 3.76E-01 | 3.08E-03 | -0.56 | 3.35  |
| <i>lpg0369</i> | carboxylesterase/phospholipase                                          |             | Protein fate / hydrolases / secretion    | 11.537 | 11.920 | 9.141  | 12.550 | 8.12E-01 | 1.50E-03 | 0.38  | 3.41  |
| <i>lpg0370</i> | oligoketide cyclase/lipid transporter protein COG2867                   |             | Transport and binding                    | 12.098 | 11.739 | 9.888  | 12.375 | 4.28E-01 | 1.21E-03 | -0.36 | 2.49  |
| <i>lpg0370</i> | oligoketide cyclase/lipid transporter protein COG2867                   |             | Transport and binding                    | 12.157 | 11.871 | 9.507  | 12.332 | 5.43E-01 | 8.29E-05 | -0.29 | 2.82  |
| <i>lpg0371</i> | hypothetical COG2914                                                    |             | Unknown / hypothetical proteins          | 11.738 | 11.144 | 11.708 | 10.537 | 9.27E-02 | 2.23E-02 | -0.59 | -1.17 |
| <i>lpg0371</i> | hypothetical COG2914                                                    |             | Unknown / hypothetical proteins          | 11.783 | 11.058 | 11.781 | 11.098 | 1.83E-02 | 1.35E-02 | -0.72 | -0.68 |
| <i>lpg0372</i> | COG2913 small protein A (tmRNA-binding), outer membr                    | <i>smmA</i> | Signal transduction / other regulatory f | 11.698 | 10.487 | 8.609  | 11.108 | 3.56E-03 | 1.18E-02 | -1.21 | 2.50  |
| <i>lpg0372</i> | COG2913 small protein A (tmRNA-binding), outer membr                    | <i>smmA</i> | Signal transduction / other regulatory f | 11.659 | 10.571 | 8.249  | 11.188 | 1.05E-02 | 5.74E-03 | -1.09 | 2.94  |
| <i>lpg0373</i> | components of sensory transduction system (sensory box/GGDEF D          |             | Signal transduction / other regulatory f | 8.160  | 7.537  | 7.744  | 7.424  | 5.48E-01 | 8.68E-01 | -0.62 | -0.32 |
| <i>lpg0373</i> | components of sensory transduction system (sensory box/GGDEF D          |             | Signal transduction / other regulatory f | 8.719  | 6.898  | 8.080  | 7.792  | 1.58E-01 | 7.81E-01 | -1.82 | -0.29 |
| <i>lpg0374</i> | adenylate cyclase? (ATP-pyrophosphate lyase?) lipoprotein?              |             | Unknown / hypothetical proteins          | 11.969 | 10.523 | 8.479  | 11.324 | 1.73E-01 | 8.94E-03 | -1.45 | 2.85  |
| <i>lpg0374</i> | adenylate cyclase? (ATP-pyrophosphate lyase?) lipoprotein?              |             | Unknown / hypothetical proteins          | 11.769 | 11.750 | 7.756  | 11.998 | 9.82E-01 | 8.29E-03 | -0.02 | 4.24  |
| <i>lpg0375</i> | ORF                                                                     |             | ORFs of unknown function (unique)        | 10.025 | 7.674  | 7.510  | 8.245  | 2.05E-02 | 2.78E-01 | -2.35 | 0.74  |
| <i>lpg0375</i> | ORF                                                                     |             | ORFs of unknown function (unique)        | 9.697  | 8.096  | 7.157  | 8.093  | 7.57E-03 | 2.57E-01 | -1.60 | 0.94  |
| <i>lpg0376</i> | SdhA; GRIP coiled-coil protein GCC185                                   | <i>sdhA</i> | Named proteins of general function       | 11.444 | 9.725  | 9.906  | 10.611 | 1.93E-03 | 1.52E-01 | -1.72 | 0.71  |
| <i>lpg0376</i> | SdhA; GRIP coiled-coil protein GCC185                                   | <i>sdhA</i> | Named proteins of general function       | 11.534 | 9.388  | 10.300 | 11.028 | 2.43E-02 | 9.92E-02 | -2.15 | 0.73  |
| <i>lpg0377</i> | hypothetical protein                                                    |             | Unknown / hypothetical proteins          | 11.579 | 10.215 | 11.281 | 9.524  | 1.02E-01 | 1.31E-01 | -1.36 | -1.76 |
| <i>lpg0377</i> | hypothetical protein                                                    |             | Unknown / hypothetical proteins          | 11.686 | 9.758  | 11.223 | 10.244 | 6.62E-04 | 3.55E-02 | -1.93 | -0.98 |
| <i>lpg0378</i> | A. fulgidus predicted coding region AF2307                              |             | Unknown / hypothetical proteins          | 12.594 | 11.137 | 12.255 | 10.973 | 2.13E-02 | 1.31E-01 | -1.46 | -1.28 |
| <i>lpg0378</i> | A. fulgidus predicted coding region AF2307                              |             | Unknown / hypothetical proteins          | 12.583 | 11.900 | 12.252 | 12.012 | 3.70E-02 | 4.45E-01 | -0.68 | -0.24 |
| <i>lpg0379</i> | ribosomal protein S6 modification protein (glutathione synthase)        |             | Amino Acid Metabolism, Metabolism o      | 12.666 | 11.537 | 12.184 | 11.571 | 2.87E-05 | 6.26E-02 | -1.13 | -0.61 |
| <i>lpg0379</i> | ribosomal protein S6 modification protein (glutathione synthase)        |             | Amino Acid Metabolism, Metabolism o      | 12.713 | 11.494 | 12.148 | 11.594 | 4.94E-04 | 6.14E-02 | -1.22 | -0.55 |
| <i>lpg0380</i> | ORF                                                                     |             | ORFs of unknown function (unique)        | 12.515 | 10.928 | 12.321 | 11.347 | 2.14E-01 | 1.05E-01 | -1.59 | -0.97 |
| <i>lpg0380</i> | ORF                                                                     |             | ORFs of unknown function (unique)        | 12.647 | 11.980 | 12.545 | 11.852 | 1.49E-01 | 1.55E-02 | -0.67 | -0.69 |
| <i>lpg0381</i> | hypothetical                                                            |             | Unknown / hypothetical proteins          | 9.463  | 8.925  | 9.068  | 8.470  | 2.01E-01 | 5.03E-01 | -0.54 | -0.60 |
| <i>lpg0381</i> | hypothetical                                                            |             | Unknown / hypothetical proteins          | 9.073  | 8.889  | 9.260  | 8.974  | 6.74E-01 | 6.92E-01 | -0.18 | -0.29 |
| <i>lpg0382</i> | osmotically inducible protein Y                                         | <i>osmY</i> | Detoxification / adaptation              | 10.427 | 10.617 | 11.080 | 9.435  | 6.18E-01 | 2.54E-03 | 0.19  | -1.64 |
| <i>lpg0382</i> | osmotically inducible protein Y                                         | <i>osmY</i> | Detoxification / adaptation              | 10.397 | 10.873 | 10.860 | 9.511  | 4.09E-02 | 5.68E-03 | 0.48  | -1.35 |
| <i>lpg0383</i> | small ORF (160aa) very weak lcmL homolog                                |             | Transport and binding, Toxin productio   | 10.504 | 9.969  | 12.893 | 10.176 | 4.27E-01 | 4.87E-03 | -0.53 | -2.72 |
| <i>lpg0383</i> | small ORF (160aa) very weak lcmL homolog                                |             | Transport and binding, Toxin productio   | 10.472 | 9.549  | 12.920 | 10.300 | 1.92E-01 | 9.15E-03 | -0.92 | -2.52 |
| <i>lpg0384</i> | excinuclease ABC A subunit (UvrA)                                       | <i>uvrA</i> | DNA/RNA degradation / restriction        | 11.338 | 10.107 | 10.163 | 11.298 | 2.29E-02 | 3.19E-02 | -1.23 | 1.14  |
| <i>lpg0384</i> | excinuclease ABC A subunit (UvrA)                                       | <i>uvrA</i> | DNA/RNA degradation / restriction        | 11.614 | 11.054 | 10.266 | 11.963 | 5.33E-01 | 3.27E-02 | -0.56 | 1.70  |

|                |                                                                       |              |                                           |        |        |        |        |          |          |       |       |
|----------------|-----------------------------------------------------------------------|--------------|-------------------------------------------|--------|--------|--------|--------|----------|----------|-------|-------|
| <i>lpg0385</i> | LemA protein (cytoplasmic membrane protein)                           |              | Toxin production / other pathogen func    | 11.938 | 11.573 | 13.885 | 10.172 | 5.40E-01 | 3.19E-04 | -0.36 | -3.71 |
| <i>lpg0385</i> | LemA protein (cytoplasmic membrane protein)                           |              | Toxin production / other pathogen func    | 11.959 | 10.476 | 13.909 | 10.271 | 2.75E-01 | 4.39E-04 | -1.48 | -3.64 |
| <i>lpg0386</i> | heat shock protein HtpX (protease) (stress protein)                   | <i>htpX</i>  | Detoxification / adaptation, Protein fate | 11.706 | 10.375 | 11.758 | 11.443 | 2.38E-02 | 2.66E-01 | -1.33 | -0.31 |
| <i>lpg0386</i> | heat shock protein HtpX (protease) (stress protein)                   | <i>htpX</i>  | Detoxification / adaptation, Protein fate | 10.214 | 10.094 | 11.359 | 11.067 | 7.84E-01 | 5.39E-01 | -0.12 | -0.29 |
| <i>lpg0387</i> | ABC transporter, permease protein                                     |              | Transport and binding                     | 11.527 | 9.585  | 9.905  | 9.905  | 1.18E-05 | 4.22E-01 | -1.94 | -0.35 |
| <i>lpg0387</i> | ABC transporter, permease protein                                     |              | Transport and binding                     | 11.557 | 9.699  | 10.310 | 10.228 | 2.92E-04 | 8.48E-01 | -1.86 | -0.08 |
| <i>lpg0388</i> | ABC transporter, ATP binding component                                |              | Transport and binding                     | 10.189 | 10.827 | 10.121 | 9.476  | 5.53E-02 | 4.89E-01 | 0.64  | -0.64 |
| <i>lpg0388</i> | ABC transporter, ATP binding component                                |              | Transport and binding                     | 9.985  | 10.610 | 9.906  | 10.444 | 2.63E-01 | 1.74E-01 | 0.63  | 0.54  |
| <i>lpg0389</i> | ORF                                                                   |              | ORFs of unknown function (unique)         | 10.239 | 8.024  | 9.391  | 8.055  | 2.08E-03 | 1.39E-01 | -2.22 | -1.34 |
| <i>lpg0389</i> | ORF                                                                   |              | ORFs of unknown function (unique)         | 8.196  | 6.383  | 7.941  | 7.787  | 6.51E-02 | 9.00E-01 | -1.81 | -0.15 |
| <i>lpg0390</i> | ORF                                                                   | <i>vipA</i>  | ORFs of unknown function (unique)         | 11.960 | 12.424 | 11.161 | 11.022 | 5.89E-02 | 5.96E-01 | 0.46  | -0.14 |
| <i>lpg0390</i> | ORF                                                                   | <i>vipA</i>  | ORFs of unknown function (unique)         | 11.658 | 12.336 | 10.934 | 11.060 | 3.19E-03 | 7.39E-01 | 0.68  | 0.13  |
| <i>lpg0391</i> | SM20-related protein (Ca binding protein)                             |              | Transport and binding                     | 10.192 | 9.468  | 9.762  | 9.022  | 2.08E-01 | 1.43E-01 | -0.72 | -0.74 |
| <i>lpg0391</i> | SM20-related protein (Ca binding protein)                             |              | Transport and binding                     | 10.077 | 9.531  | 9.842  | 9.169  | 4.33E-01 | 1.42E-01 | -0.55 | -0.67 |
| <i>lpg0392</i> | zinc metalloprotease (metal-dependent hydrolase)                      |              | Protein fate / hydrolases / secretion     | 9.878  | 7.776  | 10.397 | 8.382  | 5.97E-04 | 7.85E-03 | -2.10 | -2.01 |
| <i>lpg0392</i> | zinc metalloprotease (metal-dependent hydrolase)                      |              | Protein fate / hydrolases / secretion     | 10.945 | 8.159  | 8.995  | 8.590  | 1.66E-02 | 5.80E-01 | -2.79 | -0.41 |
| <i>lpg0393</i> | ORF                                                                   |              | ORFs of unknown function (unique)         | 9.281  | 8.595  | 9.374  | 8.663  | 2.39E-01 | 7.06E-02 | -0.69 | -0.71 |
| <i>lpg0393</i> | ORF                                                                   |              | ORFs of unknown function (unique)         | 10.255 | 9.559  | 8.601  | 10.413 | 3.62E-01 | 7.65E-02 | -0.70 | 1.81  |
| <i>lpg0394</i> | COG0350 methylated DNA protein cysteine S-methyltransferase           |              | Named proteins of general function        | 11.448 | 9.311  | 9.226  | 10.456 | 4.90E-03 | 1.63E-01 | -2.14 | 1.23  |
| <i>lpg0394</i> | COG0350 methylated DNA protein cysteine S-methyltransferase           |              | Named proteins of general function        | 11.319 | 9.135  | 8.861  | 10.635 | 1.55E-03 | 1.16E-01 | -2.18 | 1.77  |
| <i>lpg0395</i> | 50S ribosomal protein L19                                             | <i>rplS</i>  | Translation                               | 13.655 | 11.412 | 11.402 | 12.988 | 4.93E-03 | 4.60E-02 | -2.24 | 1.59  |
| <i>lpg0395</i> | 50S ribosomal protein L19                                             | <i>rplS</i>  | Translation                               | 13.372 | 11.453 | 11.248 | 13.091 | 2.57E-02 | 2.44E-02 | -1.92 | 1.84  |
| <i>lpg0396</i> | tRNA (guanine N1) methyltransferase                                   | <i>trmD</i>  | DNA/RNA degradation / restriction, Tr     | 11.315 | 9.161  | 9.225  | 11.621 | 1.25E-02 | 2.07E-02 | -2.15 | 2.40  |
| <i>lpg0396</i> | tRNA (guanine N1) methyltransferase                                   | <i>trmD</i>  | DNA/RNA degradation / restriction, Tr     | 11.964 | 9.529  | 8.992  | 11.617 | 4.24E-05 | 1.87E-02 | -2.44 | 2.63  |
| <i>lpg0397</i> | 16S rRNA processing protein RimM                                      | <i>rimM</i>  | DNA/RNA degradation / restriction, Tr     | 12.380 | 9.782  | 8.561  | 12.972 | 2.49E-02 | 4.16E-03 | -2.60 | 4.41  |
| <i>lpg0397</i> | 16S rRNA processing protein RimM                                      | <i>rimM</i>  | DNA/RNA degradation / restriction, Tr     | 12.299 | 9.909  | 7.484  | 13.135 | 5.76E-02 | 6.98E-03 | -2.39 | 5.65  |
| <i>lpg0398</i> | ORF                                                                   |              | ORFs of unknown function (unique)         | 10.243 | 9.176  | 8.647  | 10.593 | 2.73E-01 | 3.79E-03 | -1.07 | 1.95  |
| <i>lpg0398</i> | ORF                                                                   |              | ORFs of unknown function (unique)         | 10.195 | 9.249  | 8.278  | 10.367 | 2.07E-01 | 5.48E-03 | -0.95 | 2.09  |
| <i>lpg0399</i> | 30S ribosomal protein S16                                             | <i>rpsP</i>  | Translation                               | 14.329 | 12.927 | 12.098 | 14.675 | 7.56E-02 | 6.28E-03 | -1.40 | 2.58  |
| <i>lpg0399</i> | 30S ribosomal protein S16                                             | <i>rpsP</i>  | Translation                               | 14.459 | 13.047 | 11.685 | 14.671 | 4.13E-02 | 1.59E-03 | -1.41 | 2.99  |
| <i>lpg0400</i> | signal recognition particle protein Ffh (GTP-binding expo             | <i>ffh</i>   | Protein fate / hydrolases / secretion     | 11.076 | 11.162 | 9.881  | 11.804 | 8.92E-01 | 2.47E-02 | 0.09  | 1.92  |
| <i>lpg0400</i> | signal recognition particle protein Ffh (GTP-binding expo             | <i>ffh</i>   | Protein fate / hydrolases / secretion     | 11.047 | 11.225 | 9.840  | 12.183 | 8.13E-01 | 8.51E-03 | 0.18  | 2.34  |
| <i>lpg0401</i> | ORF                                                                   |              | ORFs of unknown function (unique)         | 8.439  | 8.270  | 8.245  | 10.777 | 8.51E-01 | 3.37E-04 | -0.17 | 2.53  |
| <i>lpg0401</i> | ORF                                                                   |              | ORFs of unknown function (unique)         | 8.215  | 9.203  | 7.501  | 10.624 | 3.08E-02 | 1.00E-02 | 0.99  | 3.12  |
| <i>lpg0402</i> | putative ankyrin-repeat containing protein                            | <i>legA9</i> | Named proteins of general function        | 9.901  | 8.624  | 9.588  | 9.373  | 8.31E-02 | 5.16E-01 | -1.28 | -0.21 |
| <i>lpg0402</i> | putative ankyrin-repeat containing protein                            | <i>legA9</i> | Named proteins of general function        | 9.714  | 9.320  | 9.138  | 9.389  | 1.57E-01 | 6.44E-01 | -0.39 | 0.25  |
| <i>lpg0403</i> | similar to RIKEN cDNA 1700007B22                                      | <i>legA7</i> | Unknown / hypothetical proteins           | 10.571 | 9.518  | 11.432 | 9.425  | 9.01E-02 | 1.43E-02 | -1.05 | -2.01 |
| <i>lpg0403</i> | similar to RIKEN cDNA 1700007B22                                      | <i>legA7</i> | Unknown / hypothetical proteins           | 10.479 | 9.821  | 11.380 | 9.511  | 1.09E-01 | 1.48E-02 | -0.66 | -1.87 |
| <i>lpg0404</i> | amino acid antiporter (glutamate/gamma-aminobutyrate antiporter)      |              | Transport and binding                     | 11.101 | 10.630 | 7.930  | 9.923  | 5.49E-01 | 1.32E-01 | -0.47 | 1.99  |
| <i>lpg0404</i> | amino acid antiporter (glutamate/gamma-aminobutyrate antiporter)      |              | Transport and binding                     | 10.956 | 10.820 | 8.516  | 10.544 | 8.84E-01 | 9.63E-02 | -0.14 | 2.03  |
| <i>lpg0405</i> | ORF                                                                   |              | ORFs of unknown function (unique)         | 10.645 | 9.841  | 10.307 | 10.394 | 1.38E-01 | 9.34E-01 | -0.80 | 0.09  |
| <i>lpg0405</i> | ORF                                                                   |              | ORFs of unknown function (unique)         | 10.636 | 9.351  | 9.411  | 10.084 | 4.38E-03 | 3.30E-01 | -1.28 | 0.67  |
| <i>lpg0406</i> | hypothetical (carboxymuconolactonase decarboxylase family protein)    |              | Named proteins of general function        | 13.200 | 14.275 | 12.554 | 14.227 | 6.11E-03 | 9.24E-05 | 1.08  | 1.67  |
| <i>lpg0406</i> | hypothetical (carboxymuconolactonase decarboxylase family protein)    |              | Named proteins of general function        | 13.124 | 14.204 | 12.387 | 14.156 | 9.01E-03 | 6.40E-05 | 1.08  | 1.77  |
| <i>lpg0407</i> | ORF                                                                   |              | ORFs of unknown function (unique)         | 11.717 | 12.383 | 11.659 | 12.233 | 2.76E-02 | 1.11E-01 | 0.67  | 0.57  |
| <i>lpg0407</i> | ORF                                                                   |              | ORFs of unknown function (unique)         | 11.628 | 12.637 | 11.720 | 12.570 | 1.54E-02 | 8.95E-03 | 1.01  | 0.85  |
| <i>lpg0408</i> | inner (transmembrane) protein (disulfide bond formation protein? (pro |              | Protein fate / hydrolases / secretion     | 11.771 | 10.753 | 11.915 | 10.831 | 5.30E-03 | 1.29E-02 | -1.02 | -1.08 |
| <i>lpg0408</i> | inner (transmembrane) protein (disulfide bond formation protein? (pro |              | Protein fate / hydrolases / secretion     | 11.709 | 10.487 | 11.977 | 10.979 | 1.08E-03 | 2.13E-03 | -1.22 | -1.00 |
| <i>lpg0409</i> | hypothetical (SURF1 family) (cytochrome c oxidase assembly protein    |              | Energy Metabolism                         | 11.178 | 11.013 | 10.142 | 10.446 | 4.94E-01 | 4.73E-01 | -0.16 | 0.30  |
| <i>lpg0409</i> | hypothetical (SURF1 family) (cytochrome c oxidase assembly protein    |              | Energy Metabolism                         | 11.121 | 10.863 | 9.613  | 10.506 | 3.97E-01 | 1.41E-01 | -0.26 | 0.89  |
| <i>lpg0410</i> | hypothetical protein                                                  |              | Unknown / hypothetical proteins           | 11.427 | 10.506 | 9.021  | 9.984  | 1.62E-02 | 3.90E-01 | -0.92 | 0.96  |
| <i>lpg0410</i> | hypothetical protein                                                  |              | Unknown / hypothetical proteins           | 11.111 | 10.113 | 8.582  | 9.896  | 5.07E-02 | 2.92E-01 | -1.00 | 1.31  |
| <i>lpg0411</i> | cytochrome c oxidase assembly protein (membrane protein)              |              | Energy Metabolism                         | 11.263 | 9.820  | 9.811  | 10.714 | 9.40E-03 | 1.14E-01 | -1.44 | 0.90  |
| <i>lpg0411</i> | cytochrome c oxidase assembly protein (membrane protein)              |              | Energy Metabolism                         | 11.410 | 10.030 | 9.602  | 10.574 | 3.15E-02 | 1.13E-01 | -1.38 | 0.97  |
| <i>lpg0412</i> | protoheme IX farnesyltransferase (cytochrome c oxidase assembly fa    |              | Energy Metabolism                         | 10.726 | 9.521  | 9.258  | 10.556 | 4.94E-03 | 3.41E-02 | -1.21 | 1.30  |
| <i>lpg0412</i> | protoheme IX farnesyltransferase (cytochrome c oxidase assembly fa    |              | Energy Metabolism                         | 10.746 | 9.743  | 9.067  | 10.776 | 4.95E-03 | 4.00E-02 | -1.00 | 1.71  |
| <i>lpg0413</i> | hypothetical (SCO1/SenC family protein)                               |              | Named proteins of general function        | 12.480 | 12.862 | 11.841 | 12.752 | 1.30E-01 | 1.12E-03 | 0.38  | 0.91  |
| <i>lpg0413</i> | hypothetical (SCO1/SenC family protein)                               |              | Named proteins of general function        | 12.470 | 12.893 | 11.784 | 12.792 | 9.66E-02 | 1.04E-03 | 0.42  | 1.01  |
| <i>lpg0414</i> | glutathione synthase; ribosomal protein S6 modification protein       |              | Translation                               | 9.731  | 9.208  | 10.400 | 8.692  | 5.63E-01 | 1.53E-01 | -0.52 | -1.71 |
| <i>lpg0414</i> | glutathione synthase; ribosomal protein S6 modification protein       |              | Translation                               | 9.612  | 8.810  | 10.295 | 9.119  | 2.55E-01 | 5.79E-02 | -0.80 | -1.18 |
| <i>lpg0415</i> | ORF                                                                   |              | ORFs of unknown function (unique)         | 9.638  | 9.690  | 12.509 | 9.795  | 9.31E-01 | 3.51E-04 | 0.05  | -2.71 |
| <i>lpg0415</i> | ORF                                                                   |              | ORFs of unknown function (unique)         | 9.746  | 10.190 | 12.448 | 10.003 | 5.93E-01 | 6.88E-03 | 0.44  | -2.44 |
| <i>lpg0416</i> | glucose-6-phosphate-1-dehydrogenase                                   | <i>zwf</i>   | Carbohydrate Metabolism, Metabolism       | 12.273 | 11.280 | 14.091 | 11.614 | 5.73E-04 | 1.92E-04 | -0.99 | -2.48 |
| <i>lpg0416</i> | glucose-6-phosphate-1-dehydrogenase                                   | <i>zwf</i>   | Carbohydrate Metabolism, Metabolism       | 12.686 | 11.216 | 13.985 | 11.599 | 1.27E-03 | 7.49E-05 | -1.47 | -2.39 |

|                |                                                                        |               |                                         |        |        |        |        |          |          |       |       |
|----------------|------------------------------------------------------------------------|---------------|-----------------------------------------|--------|--------|--------|--------|----------|----------|-------|-------|
| <i>lpg0417</i> | 6-phosphogluconolactonase                                              | <i>pgl</i>    | Carbohydrate Metabolism                 | 11.926 | 11.746 | 10.360 | 12.390 | 7.45E-01 | 1.51E-02 | -0.18 | 2.03  |
| <i>lpg0417</i> | 6-phosphogluconolactonase                                              | <i>pgl</i>    | Carbohydrate Metabolism                 | 11.967 | 11.796 | 10.210 | 12.426 | 7.52E-01 | 1.18E-02 | -0.17 | 2.22  |
| <i>lpg0418</i> | 6-phosphogluconate dehydratase                                         | <i>edd</i>    | Carbohydrate Metabolism                 | 11.923 | 11.005 | 9.767  | 11.678 | 3.66E-03 | 3.10E-02 | -0.92 | 1.91  |
| <i>lpg0418</i> | 6-phosphogluconate dehydratase                                         | <i>edd</i>    | Carbohydrate Metabolism                 | 12.015 | 11.153 | 9.542  | 11.745 | 9.90E-04 | 1.10E-02 | -0.86 | 2.20  |
| <i>lpg0419</i> | glucokinase (glucose kinase)                                           | <i>glk</i>    | Carbohydrate Metabolism, Metabolism     | 12.966 | 11.576 | 12.570 | 12.495 | 7.99E-03 | 8.08E-01 | -1.39 | -0.07 |
| <i>lpg0419</i> | glucokinase (glucose kinase)                                           | <i>glk</i>    | Carbohydrate Metabolism, Metabolism     | 12.998 | 11.589 | 12.590 | 12.529 | 9.30E-03 | 8.48E-01 | -1.41 | -0.06 |
| <i>lpg0420</i> | multifunctional: 2-keto-3-deoxygluconate 6-phosphate alk               | <i>eda</i>    | Carbohydrate Metabolism, Amino Acid     | 12.170 | 11.148 | 10.096 | 12.263 | 9.52E-03 | 1.73E-02 | -1.02 | 2.17  |
| <i>lpg0420</i> | multifunctional: 2-keto-3-deoxygluconate 6-phosphate alk               | <i>eda</i>    | Carbohydrate Metabolism, Amino Acid     | 12.068 | 10.959 | 9.753  | 12.156 | 3.02E-02 | 1.70E-02 | -1.11 | 2.40  |
| <i>lpg0421</i> | D-xylose (galactose, arabinose)-proton symporter                       | <i>ywtG</i>   | Transport and binding                   | 10.288 | 9.486  | 9.852  | 9.091  | 5.09E-02 | 2.14E-01 | -0.80 | -0.76 |
| <i>lpg0421</i> | D-xylose (galactose, arabinose)-proton symporter                       | <i>ywtG</i>   | Transport and binding                   | 10.329 | 9.613  | 9.859  | 9.297  | 2.36E-02 | 3.42E-01 | -0.72 | -0.56 |
| <i>lpg0422</i> | glucoamylase (glucan-1,4 alpha glucosidase)                            | <i>legY</i>   | Metabolism of Complex Carbohydrate:     | 10.493 | 8.947  | 8.588  | 10.143 | 8.20E-02 | 4.22E-02 | -1.55 | 1.55  |
| <i>lpg0422</i> | glucoamylase (glucan-1,4 alpha glucosidase)                            | <i>legY</i>   | Metabolism of Complex Carbohydrate:     | 10.695 | 9.330  | 8.084  | 10.067 | 1.33E-01 | 1.07E-01 | -1.36 | 1.98  |
| <i>lpg0423</i> | transcriptional regulator (cro family) (HTH-XRE family), p             | <i>yoZG</i>   | Transcription factors / DNA binding prc | 10.586 | 10.450 | 10.649 | 10.931 | 7.12E-01 | 4.66E-01 | -0.14 | 0.28  |
| <i>lpg0423</i> | transcriptional regulator (cro family) (HTH-XRE family), p             | <i>yoZG</i>   | Transcription factors / DNA binding prc | 10.493 | 10.272 | 10.632 | 10.999 | 6.08E-01 | 2.35E-01 | -0.22 | 0.37  |
| <i>lpg0424</i> | hypothetical protein                                                   |               | Unknown / hypothetical proteins         | 10.492 | 9.572  | 9.215  | 8.926  | 4.77E-02 | 7.65E-01 | -0.92 | -0.29 |
| <i>lpg0424</i> | hypothetical protein                                                   |               | Unknown / hypothetical proteins         | 10.309 | 9.717  | 9.093  | 9.701  | 3.30E-01 | 3.63E-01 | -0.59 | 0.61  |
| <i>lpg0425</i> | ferrochelatase                                                         | <i>hemH</i>   | Metabolism of Cofactors and Vitamins    | 13.094 | 12.596 | 12.455 | 12.660 | 2.03E-02 | 2.07E-01 | -0.50 | 0.21  |
| <i>lpg0425</i> | ferrochelatase                                                         | <i>hemH</i>   | Metabolism of Cofactors and Vitamins    | 13.126 | 12.542 | 12.167 | 12.648 | 6.96E-03 | 1.72E-02 | -0.58 | 0.48  |
| <i>lpg0426</i> | cold shock protein CspH                                                | <i>cspD</i>   | Detoxification / adaptation             | 13.365 | 13.379 | 13.626 | 12.634 | 9.67E-01 | 1.96E-02 | 0.01  | -0.99 |
| <i>lpg0426</i> | cold shock protein CspH                                                | <i>cspD</i>   | Detoxification / adaptation             | 13.384 | 13.362 | 13.615 | 12.728 | 9.45E-01 | 2.68E-02 | -0.02 | -0.89 |
| <i>lpg0427</i> | diadenosine tetraphosphate (Ap4A) hydrolase,histidine triad family pr  |               | Named proteins of general function      | 10.820 | 9.711  | 9.887  | 9.728  | 1.22E-01 | 5.47E-01 | -1.11 | -0.16 |
| <i>lpg0427</i> | diadenosine tetraphosphate (Ap4A) hydrolase,histidine triad family pr  |               | Named proteins of general function      | 10.974 | 10.574 | 9.703  | 9.846  | 1.31E-01 | 5.44E-01 | -0.40 | 0.14  |
| <i>lpg0428</i> | glyoxylase domain hypothetical protein COG0346                         |               | Named proteins of general function      | 10.515 | 10.479 | 11.371 | 9.794  | 9.15E-01 | 3.30E-05 | -0.04 | -1.58 |
| <i>lpg0428</i> | glyoxylase domain hypothetical protein COG0346                         |               | Named proteins of general function      | 10.363 | 10.470 | 11.254 | 9.718  | 6.01E-01 | 4.08E-05 | 0.11  | -1.54 |
| <i>lpg0429</i> | outer membrane efflux protein (multidrug resistance) (RN <i>oprM</i> ) |               | Transport and binding                   | 11.844 | 10.852 | 11.353 | 10.889 | 2.62E-02 | 5.18E-02 | -0.99 | -0.46 |
| <i>lpg0429</i> | outer membrane efflux protein (multidrug resistance) (RN <i>oprM</i> ) |               | Transport and binding                   | 11.781 | 11.100 | 11.307 | 11.158 | 1.56E-01 | 5.40E-01 | -0.68 | -0.15 |
| <i>lpg0430</i> | multidrug resistance efflux pump PmrA (HlyD family secretion protein)  |               | Transport and binding                   | 9.814  | 9.273  | 9.585  | 8.458  | 1.29E-01 | 3.03E-02 | -0.54 | -1.13 |
| <i>lpg0430</i> | multidrug resistance efflux pump PmrA (HlyD family secretion protein)  |               | Transport and binding                   | 10.058 | 9.096  | 9.521  | 8.675  | 4.95E-02 | 2.19E-01 | -0.96 | -0.85 |
| <i>lpg0431</i> | ORF                                                                    |               | ORFs of unknown function (unique)       | 10.382 | 7.958  | 8.511  | 9.545  | 1.01E-03 | 4.64E-01 | -2.42 | 1.03  |
| <i>lpg0431</i> | ORF                                                                    |               | ORFs of unknown function (unique)       | 10.061 | 9.252  | 8.601  | 10.051 | 7.69E-03 | 6.92E-02 | -0.81 | 1.45  |
| <i>lpg0432</i> | ORF                                                                    |               | ORFs of unknown function (unique)       | 10.306 | 9.926  | 10.302 | 10.019 | 3.61E-01 | 2.40E-01 | -0.38 | -0.28 |
| <i>lpg0432</i> | ORF                                                                    |               | ORFs of unknown function (unique)       | 10.122 | 10.804 | 10.296 | 10.971 | 6.58E-03 | 9.33E-02 | 0.68  | 0.67  |
| <i>lpg0433</i> | hypothetical (transcriptional regulator), COG1733                      |               | Named proteins of general function      | 11.542 | 10.484 | 11.264 | 10.045 | 2.70E-03 | 9.97E-05 | -1.06 | -1.22 |
| <i>lpg0433</i> | hypothetical (transcriptional regulator), COG1733                      |               | Named proteins of general function      | 11.580 | 10.380 | 11.227 | 10.048 | 6.18E-03 | 3.17E-05 | -1.20 | -1.18 |
| <i>lpg0434</i> | ORF                                                                    |               | ORFs of unknown function (unique)       | 9.247  | 8.875  | 10.109 | 9.186  | 7.54E-01 | 5.71E-02 | -0.37 | -0.92 |
| <i>lpg0434</i> | ORF                                                                    |               | ORFs of unknown function (unique)       | 9.943  | 8.144  | 8.702  | 9.111  | 3.83E-03 | 4.69E-01 | -1.80 | 0.41  |
| <i>lpg0435</i> | SAM-dependent methyltransferase (tellurite resistance protein)         |               | Detoxification / adaptation             | 12.122 | 10.842 | 11.337 | 10.805 | 2.02E-02 | 6.48E-02 | -1.28 | -0.53 |
| <i>lpg0435</i> | SAM-dependent methyltransferase (tellurite resistance protein)         |               | Detoxification / adaptation             | 10.713 | 10.567 | 10.917 | 10.396 | 7.32E-01 | 1.39E-01 | -0.15 | -0.52 |
| <i>lpg0436</i> | ORF                                                                    | <i>legA11</i> | ORFs of unknown function (unique)       | 10.011 | 12.150 | 10.904 | 9.147  | 2.22E-04 | 2.28E-03 | 2.14  | -1.76 |
| <i>lpg0436</i> | ORF                                                                    | <i>legA11</i> | ORFs of unknown function (unique)       | 10.168 | 12.025 | 11.038 | 9.329  | 1.05E-03 | 1.95E-03 | 1.86  | -1.71 |
| <i>lpg0437</i> | ORF                                                                    |               | ORFs of unknown function (unique)       | 9.713  | 9.921  | 10.071 | 9.608  | 5.46E-01 | 4.06E-01 | 0.21  | -0.46 |
| <i>lpg0437</i> | ORF                                                                    |               | ORFs of unknown function (unique)       | 9.650  | 10.018 | 10.054 | 9.954  | 3.01E-01 | 8.74E-01 | 0.37  | -0.10 |
| <i>lpg0438</i> | ORF                                                                    |               | ORFs of unknown function (unique)       | 11.065 | 8.908  | 9.190  | 9.539  | 2.80E-02 | 5.05E-01 | -2.16 | 0.35  |
| <i>lpg0438</i> | ORF                                                                    |               | ORFs of unknown function (unique)       | 11.172 | 8.816  | 8.764  | 9.442  | 7.51E-04 | 4.27E-01 | -2.36 | 0.68  |
| <i>lpg0439</i> | ORF                                                                    |               | ORFs of unknown function (unique)       | 11.297 | 11.006 | 10.606 | 10.807 | 5.79E-01 | 7.10E-01 | -0.29 | 0.20  |
| <i>lpg0439</i> | ORF                                                                    |               | ORFs of unknown function (unique)       | 10.915 | 11.083 | 10.352 | 10.820 | 8.41E-01 | 4.61E-01 | 0.17  | 0.47  |
| <i>lpg0440</i> | small ORF (70aa)                                                       |               | ORFs of unknown function (unique)       | 10.911 | 10.254 | 10.744 | 10.518 | 9.09E-02 | 6.20E-01 | -0.66 | -0.23 |
| <i>lpg0440</i> | small ORF (70aa)                                                       |               | ORFs of unknown function (unique)       | 10.982 | 10.474 | 10.531 | 10.517 | 2.62E-01 | 9.77E-01 | -0.51 | -0.01 |
| <i>lpg0441</i> | IcmT                                                                   | <i>icmT</i>   | Transport and binding, Toxin productio  | 12.008 | 12.378 | 12.597 | 11.661 | 2.77E-01 | 3.14E-03 | 0.37  | -0.94 |
| <i>lpg0441</i> | IcmT                                                                   | <i>icmT</i>   | Transport and binding, Toxin productio  | 12.029 | 12.377 | 12.634 | 11.747 | 2.80E-01 | 2.27E-03 | 0.35  | -0.89 |
| <i>lpg0442</i> | IcmS                                                                   | <i>icmS</i>   | Transport and binding, Toxin productio  | 12.750 | 12.247 | 13.318 | 11.878 | 1.93E-02 | 4.03E-04 | -0.50 | -1.44 |
| <i>lpg0442</i> | IcmS                                                                   | <i>icmS</i>   | Transport and binding, Toxin productio  | 12.723 | 12.380 | 13.280 | 12.006 | 5.30E-02 | 7.76E-04 | -0.34 | -1.27 |
| <i>lpg0443</i> | IcmR                                                                   | <i>icmR</i>   | Transport and binding, Toxin productio  | 12.460 | 12.414 | 12.449 | 11.104 | 9.16E-01 | 5.31E-03 | -0.05 | -1.34 |
| <i>lpg0443</i> | IcmR                                                                   | <i>icmR</i>   | Transport and binding, Toxin productio  | 12.218 | 12.410 | 12.387 | 11.042 | 7.22E-01 | 6.00E-03 | 0.19  | -1.34 |
| <i>lpg0444</i> | IcmQ                                                                   | <i>icmQ</i>   | Transport and binding, Toxin productio  | 12.255 | 10.538 | 11.883 | 11.102 | 3.15E-03 | 1.63E-02 | -1.72 | -0.78 |
| <i>lpg0444</i> | IcmQ                                                                   | <i>icmQ</i>   | Transport and binding, Toxin productio  | 12.385 | 10.578 | 11.862 | 11.185 | 1.77E-04 | 1.61E-02 | -1.81 | -0.68 |
| <i>lpg0445</i> | IcmP (DotM)                                                            | <i>icmP</i>   | Transport and binding, Toxin productio  | 11.909 | 10.736 | 12.557 | 10.993 | 1.32E-04 | 3.60E-04 | -1.17 | -1.56 |
| <i>lpg0445</i> | IcmP (DotM)                                                            | <i>icmP</i>   | Transport and binding, Toxin productio  | 11.888 | 11.349 | 12.552 | 11.619 | 3.82E-01 | 1.12E-02 | -0.54 | -0.93 |
| <i>lpg0446</i> | IcmO (DotL) (TrbC)                                                     | <i>icmO</i>   | Transport and binding, Toxin productio  | 11.157 | 10.039 | 11.870 | 10.550 | 1.38E-02 | 1.80E-04 | -1.12 | -1.32 |
| <i>lpg0446</i> | IcmO (DotL) (TrbC)                                                     | <i>icmO</i>   | Transport and binding, Toxin productio  | 11.153 | 9.870  | 11.765 | 10.602 | 1.34E-02 | 4.31E-04 | -1.28 | -1.16 |
| <i>lpg0447</i> | LphA (DotK) (OmpA family protein)                                      | <i>lphA</i>   | Transport and binding, Toxin productio  | 13.812 | 12.810 | 13.886 | 13.059 | 2.11E-02 | 4.46E-02 | -1.00 | -0.83 |
| <i>lpg0447</i> | LphA (DotK) (OmpA family protein)                                      | <i>lphA</i>   | Transport and binding, Toxin productio  | 13.941 | 12.895 | 11.959 | 12.955 | 3.67E-03 | 1.10E-01 | -1.05 | 1.00  |
| <i>lpg0448</i> | IcmM (DotJ)                                                            | <i>icmM</i>   | Transport and binding, Toxin productio  | 13.271 | 12.246 | 12.280 | 12.390 | 1.09E-02 | 6.52E-01 | -1.03 | 0.11  |
| <i>lpg0448</i> | IcmM (DotJ)                                                            | <i>icmM</i>   | Transport and binding, Toxin productio  | 13.251 | 12.192 | 12.209 | 12.350 | 8.95E-03 | 5.67E-01 | -1.06 | 0.14  |

|                |                                                                     |              |                                          |        |        |        |        |          |          |       |       |
|----------------|---------------------------------------------------------------------|--------------|------------------------------------------|--------|--------|--------|--------|----------|----------|-------|-------|
| <i>lpg0449</i> | IcmL (DotI)                                                         | <i>icmL</i>  | Transport and binding, Toxin productio   | 12.944 | 12.137 | 12.193 | 12.330 | 2.74E-01 | 8.23E-01 | -0.81 | 0.14  |
| <i>lpg0449</i> | IcmL (DotI)                                                         | <i>icmL</i>  | Transport and binding, Toxin productio   | 12.949 | 12.590 | 11.922 | 12.720 | 2.13E-01 | 5.03E-02 | -0.36 | 0.80  |
| <i>lpg0450</i> | IcmK (DotH) (TraN)                                                  | <i>icmK</i>  | Transport and binding, Toxin productio   | 12.526 | 11.591 | 11.308 | 11.121 | 2.77E-01 | 8.41E-01 | -0.94 | -0.19 |
| <i>lpg0450</i> | IcmK (DotH) (TraN)                                                  | <i>icmK</i>  | Transport and binding, Toxin productio   | 12.448 | 12.304 | 11.188 | 11.902 | 7.80E-01 | 1.62E-01 | -0.14 | 0.71  |
| <i>lpg0451</i> | IcmE (DotG)                                                         | <i>icmE</i>  | Transport and binding, Toxin productio   | 11.600 | 11.362 | 10.942 | 11.637 | 5.93E-01 | 1.18E-01 | -0.24 | 0.69  |
| <i>lpg0451</i> | IcmE (DotG)                                                         | <i>icmE</i>  | Transport and binding, Toxin productio   | 11.436 | 11.405 | 10.697 | 11.566 | 9.48E-01 | 6.92E-02 | -0.03 | 0.87  |
| <i>lpg0452</i> | IcmG (DotF)                                                         | <i>icmG</i>  | Transport and binding, Toxin productio   | 12.274 | 11.653 | 11.286 | 12.164 | 9.48E-02 | 3.59E-02 | -0.62 | 0.88  |
| <i>lpg0452</i> | IcmG (DotF)                                                         | <i>icmG</i>  | Transport and binding, Toxin productio   | 12.056 | 11.608 | 11.180 | 12.123 | 4.37E-01 | 3.73E-02 | -0.45 | 0.94  |
| <i>lpg0453</i> | IcmC (DotE)                                                         | <i>icmC</i>  | Transport and binding, Toxin productio   | 13.403 | 11.766 | 13.851 | 12.754 | 7.62E-07 | 3.03E-02 | -1.64 | -1.10 |
| <i>lpg0453</i> | IcmC (DotE)                                                         | <i>icmC</i>  | Transport and binding, Toxin productio   | 13.410 | 11.892 | 13.877 | 12.904 | 1.18E-06 | 1.68E-02 | -1.52 | -0.97 |
| <i>lpg0454</i> | IcmD (DotP)                                                         | <i>icmD</i>  | Transport and binding, Toxin productio   | 14.858 | 13.942 | 15.105 | 13.995 | 6.47E-03 | 1.84E-04 | -0.92 | -1.11 |
| <i>lpg0454</i> | IcmD (DotP)                                                         | <i>icmD</i>  | Transport and binding, Toxin productio   | 14.789 | 14.002 | 15.081 | 14.078 | 1.27E-03 | 6.69E-05 | -0.79 | -1.00 |
| <i>lpg0455</i> | IcmJ (DotN)                                                         | <i>icmJ</i>  | Transport and binding, Toxin productio   | 13.027 | 11.876 | 13.188 | 11.805 | 1.26E-04 | 4.26E-07 | -1.15 | -1.38 |
| <i>lpg0455</i> | IcmJ (DotN)                                                         | <i>icmJ</i>  | Transport and binding, Toxin productio   | 12.803 | 11.477 | 13.026 | 11.857 | 6.14E-03 | 2.54E-05 | -1.33 | -1.17 |
| <i>lpg0456</i> | IcmB (DotO) (TraU)                                                  | <i>icmB</i>  | Transport and binding, Toxin productio   | 10.793 | 9.353  | 11.559 | 10.236 | 6.92E-05 | 1.29E-03 | -1.44 | -1.32 |
| <i>lpg0456</i> | IcmB (DotO) (TraU)                                                  | <i>icmB</i>  | Transport and binding, Toxin productio   | 10.807 | 9.886  | 11.476 | 10.550 | 5.42E-02 | 6.84E-02 | -0.92 | -0.93 |
| <i>lpg0457</i> | tphA (proP) proline/betaine transporter, MFS family                 | <i>tphA</i>  | Transport and binding                    | 9.719  | 9.031  | 9.408  | 8.484  | 5.43E-01 | 3.47E-01 | -0.69 | -0.92 |
| <i>lpg0457</i> | tphA (proP) proline/betaine transporter, MFS family                 | <i>tphA</i>  | Transport and binding                    | 9.871  | 9.426  | 9.308  | 8.721  | 6.78E-01 | 4.89E-01 | -0.45 | -0.59 |
| <i>lpg0458</i> | IcmF                                                                | <i>icmF</i>  | Transport and binding, Toxin productio   | 10.650 | 10.572 | 10.443 | 11.507 | 7.51E-01 | 5.65E-03 | -0.08 | 1.06  |
| <i>lpg0458</i> | IcmF                                                                | <i>icmF</i>  | Transport and binding, Toxin productio   | 10.255 | 10.722 | 10.164 | 11.542 | 4.16E-01 | 2.63E-03 | 0.47  | 1.38  |
| <i>lpg0459</i> | IcmH (DotU)                                                         | <i>icmH</i>  | Transport and binding, Toxin productio   | 13.595 | 13.364 | 11.525 | 14.053 | 4.99E-01 | 2.21E-04 | -0.23 | 2.53  |
| <i>lpg0459</i> | IcmH (DotU)                                                         | <i>icmH</i>  | Transport and binding, Toxin productio   | 13.510 | 13.440 | 11.535 | 14.140 | 8.51E-01 | 1.86E-04 | -0.07 | 2.61  |
| <i>lpg0460</i> | phosphoribosylamineimidazolecarboxamide formyltransf                | <i>purH</i>  | Nucleotide Metabolism, Metabolism of     | 11.269 | 11.717 | 10.432 | 12.351 | 2.30E-01 | 1.07E-02 | 0.45  | 1.92  |
| <i>lpg0460</i> | phosphoribosylamineimidazolecarboxamide formyltransf                | <i>purH</i>  | Nucleotide Metabolism, Metabolism of     | 11.282 | 11.687 | 9.489  | 12.363 | 2.73E-01 | 1.75E-02 | 0.40  | 2.87  |
| <i>lpg0461</i> | ribosomal protein L11 methyltransferase                             | <i>prmA</i>  | Translation                              | 12.262 | 11.497 | 11.285 | 13.350 | 5.85E-02 | 7.50E-05 | -0.76 | 2.06  |
| <i>lpg0461</i> | ribosomal protein L11 methyltransferase                             | <i>prmA</i>  | Translation                              | 12.327 | 11.468 | 11.220 | 13.285 | 4.05E-02 | 3.36E-04 | -0.86 | 2.07  |
| <i>lpg0462</i> | acetyl CoA carboxylase, biotin carboxylase subunit                  | <i>accC</i>  | Lipid Metabolism                         | 11.503 | 11.856 | 10.365 | 13.592 | 7.69E-01 | 6.49E-04 | 0.35  | 3.23  |
| <i>lpg0462</i> | acetyl CoA carboxylase, biotin carboxylase subunit                  | <i>accC</i>  | Lipid Metabolism                         | 12.094 | 11.867 | 10.019 | 13.564 | 6.96E-01 | 2.65E-05 | -0.23 | 3.54  |
| <i>lpg0463</i> | acetyl CoA carboxylase, biotin carboxyl carrier protein             |              | Carbohydrate Metabolism, Lipid Metab     | 9.582  | 10.568 | 9.671  | 12.006 | 4.58E-03 | 8.98E-05 | 0.99  | 2.33  |
| <i>lpg0463</i> | acetyl CoA carboxylase, biotin carboxyl carrier protein             |              | Carbohydrate Metabolism, Lipid Metab     | 9.824  | 10.826 | 9.343  | 12.100 | 7.88E-04 | 1.94E-05 | 1.00  | 2.76  |
| <i>lpg0464</i> | 3-dehydroquininate dehydratase type                                 | <i>aroQ</i>  | Amino Acid Metabolism                    | 11.675 | 10.727 | 10.031 | 11.048 | 4.84E-03 | 1.81E-01 | -0.95 | 1.02  |
| <i>lpg0464</i> | 3-dehydroquininate dehydratase type                                 | <i>aroQ</i>  | Amino Acid Metabolism                    | 11.763 | 11.202 | 10.008 | 11.278 | 5.29E-02 | 1.06E-01 | -0.56 | 1.27  |
| <i>lpg0465</i> | small ORF (79aa)                                                    |              | ORFs of unknown function (unique)        | 6.899  | 9.155  | 7.749  | 8.203  | 3.71E-02 | 5.29E-01 | 2.26  | 0.45  |
| <i>lpg0465</i> | small ORF (79aa)                                                    |              | ORFs of unknown function (unique)        | 6.705  | 8.831  | 7.363  | 7.932  | 1.11E-01 | 5.31E-01 | 2.13  | 0.57  |
| <i>lpg0466</i> | oxaloacetate decarboxylase alpha subunit (pyruvate carboxylase sub  |              | Carbohydrate Metabolism, Amino Acid      | 9.825  | 9.824  | 9.382  | 9.987  | 9.97E-01 | 1.44E-01 | 0.00  | 0.60  |
| <i>lpg0466</i> | oxaloacetate decarboxylase alpha subunit (pyruvate carboxylase sub  |              | Carbohydrate Metabolism, Amino Acid      | 9.979  | 9.559  | 9.325  | 10.025 | 3.16E-01 | 5.28E-02 | -0.42 | 0.70  |
| <i>lpg0467</i> | zinc metalloprotease (hemagglutinin/protease)                       |              | Toxin production / other pathogen func   | 14.040 | 15.637 | 12.227 | 14.793 | 1.89E-03 | 5.27E-05 | 1.60  | 2.57  |
| <i>lpg0467</i> | zinc metalloprotease (hemagglutinin/protease)                       |              | Toxin production / other pathogen func   | 13.988 | 15.665 | 12.246 | 14.816 | 4.13E-04 | 4.08E-05 | 1.68  | 2.57  |
| <i>lpg0468</i> | lipase A                                                            |              | Protein fate / hydrolases / secretion    | 10.701 | 11.266 | 9.956  | 10.191 | 1.51E-01 | 6.19E-01 | 0.57  | 0.23  |
| <i>lpg0468</i> | lipase A                                                            |              | Protein fate / hydrolases / secretion    | 10.543 | 11.313 | 9.224  | 10.412 | 3.41E-02 | 2.37E-01 | 0.77  | 1.19  |
| <i>lpg0469</i> | endonuclease/exonuclease/phosphatase family protein                 |              | DNA/RNA degradation / restriction        | 9.930  | 8.964  | 11.646 | 8.976  | 8.85E-02 | 6.43E-05 | -0.97 | -2.67 |
| <i>lpg0469</i> | endonuclease/exonuclease/phosphatase family protein                 |              | DNA/RNA degradation / restriction        | 9.999  | 8.736  | 11.651 | 9.174  | 8.98E-03 | 6.98E-04 | -1.26 | -2.48 |
| <i>lpg0470</i> | fructose bisphosphate aldolase                                      |              | Carbohydrate Metabolism, Energy Me       | 11.656 | 13.691 | 11.107 | 13.574 | 5.03E-06 | 3.04E-04 | 2.03  | 2.47  |
| <i>lpg0470</i> | fructose bisphosphate aldolase                                      |              | Carbohydrate Metabolism, Energy Me       | 11.854 | 13.676 | 10.906 | 13.548 | 1.48E-06 | 2.46E-04 | 1.82  | 2.64  |
| <i>lpg0471</i> | phenol hydroxylase (ferredoxin-NADP reductase)                      | <i>poxF</i>  | Energy Metabolism                        | 9.769  | 10.837 | 9.636  | 11.747 | 5.28E-03 | 3.41E-05 | 1.07  | 2.11  |
| <i>lpg0471</i> | phenol hydroxylase (ferredoxin-NADP reductase)                      | <i>poxF</i>  | Energy Metabolism                        | 9.710  | 10.830 | 8.565  | 11.646 | 4.70E-04 | 1.76E-03 | 1.12  | 3.08  |
| <i>lpg0472</i> | IcmC homolog (DotV)                                                 |              | Transport and binding, Toxin productio   | 10.151 | 10.675 | 11.586 | 11.115 | 6.54E-02 | 1.75E-01 | 0.52  | -0.47 |
| <i>lpg0472</i> | IcmC homolog (DotV)                                                 |              | Transport and binding, Toxin productio   | 9.848  | 10.810 | 11.708 | 11.361 | 2.88E-02 | 2.93E-01 | 0.96  | -0.35 |
| <i>lpg0473</i> | hypothetical (PhnO related protein) phosphonate metabolism, gene r  |              | Signal transduction / other regulatory f | 11.412 | 10.160 | 12.197 | 10.789 | 6.04E-03 | 3.15E-03 | -1.25 | -1.41 |
| <i>lpg0473</i> | hypothetical (PhnO related protein) phosphonate metabolism, gene r  |              | Signal transduction / other regulatory f | 11.359 | 10.513 | 12.189 | 10.936 | 6.55E-03 | 8.20E-03 | -0.85 | -1.25 |
| <i>lpg0474</i> | CDP-diacylglycerol-serine-O-phosphatidyltransferase (phosphatidylse |              | Amino Acid Metabolism, Metabolism o      | 12.290 | 12.589 | 11.042 | 12.672 | 5.49E-01 | 2.10E-03 | 0.30  | 1.63  |
| <i>lpg0474</i> | CDP-diacylglycerol-serine-O-phosphatidyltransferase (phosphatidylse |              | Amino Acid Metabolism, Metabolism o      | 13.206 | 12.588 | 10.684 | 12.748 | 1.96E-01 | 3.79E-03 | -0.62 | 2.06  |
| <i>lpg0475</i> | sugar transport PTS system phosphocarrier HPr protein               | <i>ptsH</i>  | Transport and binding                    | 12.352 | 11.843 | 11.225 | 11.581 | 3.13E-01 | 3.18E-01 | -0.51 | 0.36  |
| <i>lpg0475</i> | sugar transport PTS system phosphocarrier HPr protein               | <i>ptsH</i>  | Transport and binding                    | 11.985 | 11.734 | 11.113 | 11.522 | 7.37E-01 | 2.40E-01 | -0.25 | 0.41  |
| <i>lpg0476</i> | sigma-54 modulation protein                                         |              | Transcription factors / DNA binding prc  | 13.632 | 12.715 | 14.624 | 11.767 | 1.02E-03 | 1.80E-06 | -0.92 | -2.86 |
| <i>lpg0476</i> | sigma-54 modulation protein                                         |              | Transcription factors / DNA binding prc  | 13.564 | 12.620 | 14.596 | 11.812 | 2.50E-03 | 1.26E-06 | -0.94 | -2.78 |
| <i>lpg0477</i> | RNA polymerase sigma-54 factor RpoN                                 |              | Transcription factors / DNA binding prc  | 11.940 | 11.707 | 12.771 | 11.477 | 4.72E-01 | 2.86E-02 | -0.23 | -1.29 |
| <i>lpg0477</i> | RNA polymerase sigma-54 factor RpoN                                 |              | Transcription factors / DNA binding prc  | 12.035 | 12.189 | 12.794 | 12.202 | 7.80E-01 | 2.75E-01 | 0.15  | -0.59 |
| <i>lpg0478</i> | 50S ribosomal protein L33                                           | <i>rpl33</i> | Translation                              | 12.952 | 13.113 | 10.265 | 13.863 | 8.84E-01 | 2.01E-03 | 0.16  | 3.60  |
| <i>lpg0478</i> | 50S ribosomal protein L33                                           | <i>rpl33</i> | Translation                              | 13.079 | 13.048 | 9.792  | 13.813 | 9.74E-01 | 3.79E-03 | -0.03 | 4.02  |
| <i>lpg0479</i> | 50S ribosomal protein L28                                           | <i>rpmB</i>  | Translation                              | 13.794 | 13.752 | 10.330 | 14.837 | 9.70E-01 | 4.06E-03 | -0.04 | 4.51  |
| <i>lpg0479</i> | 50S ribosomal protein L28                                           | <i>rpmB</i>  | Translation                              | 13.662 | 13.689 | 9.893  | 14.767 | 9.80E-01 | 5.62E-03 | 0.03  | 4.87  |
| <i>lpg0480</i> | small ORF (53aa)                                                    |              | ORFs of unknown function (unique)        | 10.227 | 10.279 | 9.951  | 10.133 | 9.01E-01 | 7.71E-01 | 0.05  | 0.18  |
| <i>lpg0480</i> | small ORF (53aa)                                                    |              | ORFs of unknown function (unique)        | 10.099 | 11.207 | 9.869  | 10.420 | 1.66E-02 | 4.94E-01 | 1.11  | 0.55  |

|                |                                                                                                          |        |        |        |        |          |          |       |       |
|----------------|----------------------------------------------------------------------------------------------------------|--------|--------|--------|--------|----------|----------|-------|-------|
| <i>lpg0481</i> | (S-adenosylmethionine-dependent) methyltransferase [tRNA(guanine DNA/RNA degradation / restriction, Tr   | 10.288 | 10.125 | 9.205  | 11.113 | 6.46E-01 | 3.02E-03 | -0.16 | 1.91  |
| <i>lpg0481</i> | (S-adenosylmethionine-dependent) methyltransferase [tRNA(guanine DNA/RNA degradation / restriction, Tr   | 10.280 | 10.304 | 8.169  | 11.328 | 9.53E-01 | 4.38E-02 | 0.02  | 3.16  |
| <i>lpg0482</i> | endo-1,4 beta-glucanase or (deblocking) aminopeptidase (zinc metal Protein fate / hydrolases / secretion | 9.226  | 12.298 | 10.583 | 12.644 | 4.45E-05 | 2.53E-03 | 3.07  | 2.06  |
| <i>lpg0482</i> | endo-1,4 beta-glucanase or (deblocking) aminopeptidase (zinc metal Protein fate / hydrolases / secretion | 9.736  | 12.234 | 10.527 | 12.688 | 5.21E-05 | 5.33E-04 | 2.50  | 2.16  |
| <i>lpg0483</i> | ORF <i>LegA12</i> ORFs of unknown function (unique)                                                      | 11.738 | 13.750 | 12.338 | 12.313 | 6.89E-02 | 9.51E-01 | 2.01  | -0.03 |
| <i>lpg0483</i> | ORF <i>LegA12</i> ORFs of unknown function (unique)                                                      | 11.779 | 14.324 | 12.356 | 12.517 | 2.88E-04 | 4.93E-01 | 2.54  | 0.16  |
| <i>lpg0484</i> | HflK protein (phage lambda CII protease?) <i>hflK</i> Protein fate / hydrolases / secretion, V           | 13.233 | 12.968 | 11.789 | 13.828 | 5.52E-01 | 4.58E-04 | -0.27 | 2.04  |
| <i>lpg0484</i> | HflK protein (phage lambda CII protease?) <i>hflK</i> Protein fate / hydrolases / secretion, V           | 13.226 | 12.931 | 11.673 | 13.801 | 5.45E-01 | 3.68E-04 | -0.30 | 2.13  |
| <i>lpg0485</i> | HflC protein (phage lambda CII repressor?) <i>hflC</i> Transcription factors / DNA binding prc           | 12.899 | 12.595 | 10.145 | 12.917 | 5.16E-01 | 1.72E-03 | -0.30 | 2.77  |
| <i>lpg0485</i> | HflC protein (phage lambda CII repressor?) <i>hflC</i> Transcription factors / DNA binding prc           | 12.857 | 12.596 | 10.050 | 12.966 | 5.99E-01 | 1.80E-03 | -0.26 | 2.92  |
| <i>lpg0486</i> | adenylosuccinate synthetase <i>purA</i> Nucleotide Metabolism, Amino Acid Me                             | 12.569 | 12.853 | 9.997  | 13.804 | 6.29E-01 | 3.11E-04 | 0.28  | 3.81  |
| <i>lpg0486</i> | adenylosuccinate synthetase <i>purA</i> Nucleotide Metabolism, Amino Acid Me                             | 12.600 | 12.848 | 9.864  | 13.836 | 6.49E-01 | 1.05E-04 | 0.25  | 3.97  |
| <i>lpg0487</i> | hypothetical Unknown / hypothetical proteins                                                             | 9.562  | 9.438  | 10.511 | 8.786  | 9.27E-01 | 3.30E-01 | -0.12 | -1.73 |
| <i>lpg0487</i> | hypothetical Unknown / hypothetical proteins                                                             | 9.140  | 8.154  | 10.622 | 9.603  | 3.70E-01 | 3.69E-01 | -0.99 | -1.02 |
| <i>lpg0488</i> | transposase (IS4 family, ISSod6) Viral functions / Phase / Transposases                                  | 11.675 | 12.236 | 11.962 | 11.480 | 1.46E-01 | 1.98E-01 | 0.56  | -0.48 |
| <i>lpg0488</i> | transposase (IS4 family, ISSod6) Viral functions / Phase / Transposases                                  | 11.649 | 12.293 | 11.748 | 11.624 | 8.43E-02 | 7.53E-01 | 0.64  | -0.12 |
| <i>lpg0489</i> | hypothetical (endonuclease?)COG2827 Unknown / hypothetical proteins                                      | 11.319 | 10.670 | 10.495 | 10.358 | 4.50E-02 | 7.52E-01 | -0.65 | -0.14 |
| <i>lpg0489</i> | hypothetical (endonuclease?)COG2827 Unknown / hypothetical proteins                                      | 11.380 | 11.199 | 10.574 | 10.473 | 6.50E-01 | 8.50E-01 | -0.18 | -0.10 |
| <i>lpg0490</i> | arginine repressor (transcriptional regulator) Transcription factors / DNA binding prc                   | 9.065  | 11.861 | 9.953  | 7.741  | 1.55E-06 | 1.30E-01 | 2.80  | -2.21 |
| <i>lpg0490</i> | arginine repressor (transcriptional regulator) Transcription factors / DNA binding prc                   | 8.103  | 11.899 | 8.576  | 7.499  | 3.04E-06 | 1.55E-01 | 3.80  | -1.08 |
| <i>lpg0491</i> | amino acid (glutamine) ABC transporter, periplasmic amino acid bindi Transport and binding               | 6.793  | 14.296 | 8.074  | 6.959  | 1.32E-03 | 4.90E-01 | 7.50  | -1.12 |
| <i>lpg0491</i> | amino acid (glutamine) ABC transporter, periplasmic amino acid bindi Transport and binding               | 7.595  | 14.539 | 7.482  | 9.037  | 2.24E-04 | 1.75E-01 | 6.94  | 1.56  |
| <i>lpg0492</i> | amino acid (glutamine) ABC transporter, permease <i>yqiY</i> Transport and binding                       | 8.362  | 14.560 | 8.518  | 7.652  | 7.48E-07 | 1.40E-01 | 6.20  | -0.87 |
| <i>lpg0492</i> | amino acid (glutamine) ABC transporter, permease <i>yqiY</i> Transport and binding                       | 7.942  | 14.808 | 8.291  | 8.501  | 2.30E-10 | 6.72E-01 | 6.87  | 0.21  |
| <i>lpg0493</i> | amino acid (glutamine) ABC transporter, ATP binding component Transport and binding                      | 7.761  | 14.050 | 7.964  | 8.160  | 1.83E-07 | 7.81E-01 | 6.29  | 0.20  |
| <i>lpg0493</i> | amino acid (glutamine) ABC transporter, ATP binding component Transport and binding                      | 7.936  | 14.108 | 7.655  | 8.827  | 2.49E-06 | 1.04E-02 | 6.17  | 1.17  |
| <i>lpg0494</i> | argininosuccinate synthase <i>argG</i> Amino Acid Metabolism                                             | 7.947  | 14.736 | 8.279  | 9.119  | 8.47E-05 | 3.06E-01 | 6.79  | 0.84  |
| <i>lpg0494</i> | argininosuccinate synthase <i>argG</i> Amino Acid Metabolism                                             | 7.498  | 15.271 | 7.146  | 9.771  | 1.14E-06 | 1.78E-01 | 7.77  | 2.63  |
| <i>lpg0495</i> | argininosuccinate lyase <i>argH</i> Amino Acid Metabolism                                                | 9.374  | 14.193 | 9.426  | 9.141  | 3.05E-05 | 4.90E-01 | 4.82  | -0.28 |
| <i>lpg0495</i> | argininosuccinate lyase <i>argH</i> Amino Acid Metabolism                                                | 9.629  | 14.101 | 9.019  | 9.041  | 9.51E-05 | 9.56E-01 | 4.47  | 0.02  |
| <i>lpg0496</i> | ornithine carbamoyltransferase <i>argF</i> Amino Acid Metabolism                                         | 9.752  | 13.545 | 10.335 | 10.355 | 4.35E-03 | 9.76E-01 | 3.79  | 0.02  |
| <i>lpg0496</i> | ornithine carbamoyltransferase <i>argF</i> Amino Acid Metabolism                                         | 9.825  | 13.784 | 10.159 | 10.203 | 1.08E-03 | 9.28E-01 | 3.96  | 0.04  |
| <i>lpg0497</i> | adenosine deaminase Nucleotide Metabolism                                                                | 11.408 | 13.059 | 12.181 | 13.498 | 2.45E-02 | 2.55E-02 | 1.65  | 1.32  |
| <i>lpg0497</i> | adenosine deaminase Nucleotide Metabolism                                                                | 11.589 | 13.790 | 12.208 | 14.076 | 2.67E-04 | 3.79E-05 | 2.20  | 1.87  |
| <i>lpg0498</i> | leucine-, isoleucine-, valine-, threonine-, and alanine-binding protein Transport and binding            | 10.765 | 10.774 | 10.703 | 9.995  | 9.84E-01 | 1.50E-01 | 0.01  | -0.71 |
| <i>lpg0498</i> | leucine-, isoleucine-, valine-, threonine-, and alanine-binding protein Transport and binding            | 10.786 | 10.932 | 10.764 | 10.444 | 6.84E-01 | 3.02E-01 | 0.15  | -0.32 |
| <i>lpg0499</i> | carboxy-terminal protease Protein fate / hydrolases / secretion                                          | 8.202  | 9.223  | 11.562 | 9.197  | 1.75E-01 | 5.26E-03 | 1.02  | -2.36 |
| <i>lpg0499</i> | carboxy-terminal protease Protein fate / hydrolases / secretion                                          | 8.554  | 8.766  | 11.610 | 9.310  | 7.61E-01 | 2.38E-03 | 0.21  | -2.30 |
| <i>lpg0500</i> | peptidase (M23/M37 family) Protein fate / hydrolases / secretion                                         | 10.825 | 9.300  | 10.276 | 9.153  | 1.91E-03 | 9.16E-02 | -1.53 | -1.12 |
| <i>lpg0500</i> | peptidase (M23/M37 family) Protein fate / hydrolases / secretion                                         | 10.779 | 8.922  | 10.235 | 9.454  | 1.14E-03 | 7.13E-02 | -1.86 | -0.78 |
| <i>lpg0501</i> | phosphoglycerate mutase, 2,3-bisphosphoglycerate inde <i>pgm</i> Carbohydrate Metabolism                 | 11.112 | 11.751 | 11.579 | 12.822 | 3.45E-03 | 3.72E-05 | 0.64  | 1.24  |
| <i>lpg0501</i> | phosphoglycerate mutase, 2,3-bisphosphoglycerate inde <i>pgm</i> Carbohydrate Metabolism                 | 11.061 | 11.766 | 11.250 | 12.707 | 5.76E-04 | 3.83E-04 | 0.70  | 1.46  |
| <i>lpg0502</i> | phosphatidylcholine hydrolyzing phospholipase Metabolism of Complex Lipids                               | 10.111 | 9.412  | 10.023 | 9.887  | 2.40E-02 | 5.54E-01 | -0.70 | -0.14 |
| <i>lpg0502</i> | phosphatidylcholine hydrolyzing phospholipase Metabolism of Complex Lipids                               | 10.049 | 9.208  | 9.733  | 9.770  | 1.27E-02 | 9.49E-01 | -0.84 | 0.04  |
| <i>lpg0503</i> | undecaprenyl diphosphate synthetase (undecaprenyl pyr <i>uppS</i> Named proteins of general function     | 10.933 | 10.845 | 9.446  | 11.853 | 8.61E-01 | 9.55E-04 | -0.09 | 2.41  |
| <i>lpg0503</i> | undecaprenyl diphosphate synthetase (undecaprenyl pyr <i>uppS</i> Named proteins of general function     | 11.220 | 11.031 | 9.183  | 11.826 | 5.98E-01 | 1.33E-03 | -0.19 | 2.64  |
| <i>lpg0504</i> | phosphatidate cytidyltransferase (CDP diglyceride synthe <i>cdsA</i> Metabolism of Complex Lipids        | 12.327 | 10.844 | 11.166 | 10.596 | 2.41E-02 | 2.97E-01 | -1.48 | -0.55 |
| <i>lpg0504</i> | phosphatidate cytidyltransferase (CDP diglyceride synthe <i>cdsA</i> Metabolism of Complex Lipids        | 12.351 | 11.048 | 11.144 | 11.187 | 1.38E-01 | 9.66E-01 | -1.30 | 0.04  |
| <i>lpg0505</i> | membrane associated zinc metalloprotease <i>yaeL</i> Protein fate / hydrolases / secretion               | 10.407 | 10.242 | 9.893  | 10.180 | 5.75E-01 | 4.39E-01 | -0.17 | 0.29  |
| <i>lpg0505</i> | membrane associated zinc metalloprotease <i>yaeL</i> Protein fate / hydrolases / secretion               | 10.454 | 10.032 | 9.859  | 10.152 | 1.18E-01 | 5.05E-01 | -0.42 | 0.29  |
| <i>lpg0506</i> | outer membrane protein (bacterial surface antigen family) Named proteins of general function             | 12.096 | 11.643 | 9.536  | 13.105 | 3.47E-01 | 2.61E-04 | -0.45 | 3.57  |
| <i>lpg0506</i> | outer membrane protein (bacterial surface antigen family) Named proteins of general function             | 12.083 | 11.685 | 9.417  | 13.060 | 3.72E-01 | 3.72E-03 | -0.40 | 3.64  |
| <i>lpg0507</i> | outer membrane protein OmpH Named proteins of general function                                           | 14.573 | 14.531 | 12.504 | 15.208 | 9.51E-01 | 4.48E-04 | -0.04 | 2.70  |
| <i>lpg0507</i> | outer membrane protein OmpH Named proteins of general function                                           | 14.444 | 14.511 | 12.525 | 15.258 | 9.19E-01 | 7.87E-04 | 0.07  | 2.73  |
| <i>lpg0508</i> | UDP-3-O-(3-hydroxymyristoyl) glucosamine N-acetyltransf <i>lpxD</i> Metabolism of Complex Carbohydrate:  | 9.530  | 10.738 | 8.588  | 13.779 | 2.94E-02 | 2.31E-08 | 1.21  | 5.19  |
| <i>lpg0508</i> | UDP-3-O-(3-hydroxymyristoyl) glucosamine N-acetyltransf <i>lpxD</i> Metabolism of Complex Carbohydrate:  | 9.210  | 10.702 | 7.629  | 13.751 | 1.54E-02 | 2.47E-07 | 1.49  | 6.12  |
| <i>lpg0509</i> | ORF sugar transporter family Transport and binding                                                       | 9.317  | 10.598 | 9.045  | 10.161 | 1.10E-01 | 3.69E-01 | 1.28  | 1.12  |
| <i>lpg0509</i> | ORF sugar transporter family Transport and binding                                                       | 8.943  | 10.277 | 9.096  | 10.932 | 1.40E-01 | 2.85E-02 | 1.33  | 1.84  |
| <i>lpg0510</i> | (3R)-hydroxymyristoyl-(acyl carrier protein) dehydratase <i>fabZ</i> Metabolism of Complex Carbohydrate: | 13.240 | 11.541 | 10.725 | 12.782 | 2.31E-02 | 6.07E-02 | -1.70 | 2.06  |
| <i>lpg0510</i> | (3R)-hydroxymyristoyl-(acyl carrier protein) dehydratase <i>fabZ</i> Metabolism of Complex Carbohydrate: | 13.313 | 12.055 | 10.952 | 13.267 | 1.30E-02 | 7.54E-03 | -1.26 | 2.32  |
| <i>lpg0511</i> | acyl-(acyl carrier protein)-UDP-N-acetylglucosamine acyl <i>lpxA</i> Metabolism of Complex Carbohydrate: | 9.340  | 8.668  | 8.627  | 10.880 | 2.75E-01 | 2.37E-02 | -0.67 | 2.25  |
| <i>lpg0511</i> | acyl-(acyl carrier protein)-UDP-N-acetylglucosamine acyl <i>lpxA</i> Metabolism of Complex Carbohydrate: | 8.834  | 8.415  | 7.362  | 10.476 | 7.22E-01 | 7.37E-03 | -0.42 | 3.11  |
| <i>lpg0512</i> | CrcB protein (transmembrane protein), chromosome condensation? c Detoxification / adaptation, Chemotaxi: | 12.273 | 10.359 | 10.218 | 11.851 | 1.23E-01 | 7.27E-02 | -1.91 | 1.63  |
| <i>lpg0512</i> | CrcB protein (transmembrane protein), chromosome condensation? c Detoxification / adaptation, Chemotaxi: | 12.540 | 11.075 | 10.222 | 12.215 | 6.97E-03 | 9.33E-03 | -1.46 | 1.99  |





|                |                                                                                    |             |                                         |        |        |        |        |          |          |       |       |
|----------------|------------------------------------------------------------------------------------|-------------|-----------------------------------------|--------|--------|--------|--------|----------|----------|-------|-------|
| <i>lpg0545</i> | tRNA-Gln                                                                           |             | tRNA                                    | 13.622 | 11.681 | 11.691 | 12.671 | 2.94E-02 | 2.51E-01 | -1.94 | 0.98  |
| <i>lpg0545</i> | tRNA-Gln                                                                           |             | tRNA                                    | 13.516 | 12.633 | 11.679 | 13.487 | 2.77E-01 | 4.46E-02 | -0.88 | 1.81  |
| <i>lpg0546</i> | small ORF (56aa)                                                                   |             | ORFs of unknown function (unique)       | 9.002  | 9.303  | 9.389  | 9.471  | 6.25E-01 | 8.73E-01 | 0.30  | 0.08  |
| <i>lpg0546</i> | small ORF (56aa)                                                                   |             | ORFs of unknown function (unique)       | 8.901  | 8.758  | 9.234  | 9.381  | 8.95E-01 | 8.49E-01 | -0.14 | 0.15  |
| <i>lpg0547</i> | outer membrane lipoprotein LolB, anchoring of lipoproteins to periplas             |             | Named proteins of general function      | 11.538 | 11.610 | 11.683 | 12.087 | 7.93E-01 | 1.47E-01 | 0.07  | 0.40  |
| <i>lpg0547</i> | outer membrane lipoprotein LolB, anchoring of lipoproteins to periplas             |             | Named proteins of general function      | 11.645 | 11.440 | 11.473 | 12.124 | 4.20E-01 | 2.10E-02 | -0.20 | 0.65  |
| <i>lpg0548</i> | phosphopantetheine adenylyltransferase (lipopolysaccha <i>kdtB</i> + <i>G443</i> ) |             | Metabolism of Cofactors and Vitamins    | 12.818 | 13.214 | 11.283 | 13.911 | 4.12E-01 | 1.75E-05 | 0.40  | 2.63  |
| <i>lpg0548</i> | phosphopantetheine adenylyltransferase (lipopolysaccha <i>kdtB</i> + <i>G443</i> ) |             | Metabolism of Cofactors and Vitamins    | 13.013 | 13.189 | 11.015 | 13.898 | 5.85E-01 | 2.37E-05 | 0.18  | 2.88  |
| <i>lpg0549</i> | gamma-glutamyltranspeptidase                                                       |             | Metabolism of Other Amino Acids, Met    | 10.309 | 7.580  | 8.502  | 8.101  | 1.95E-02 | 5.50E-01 | -2.73 | -0.40 |
| <i>lpg0549</i> | gamma-glutamyltranspeptidase                                                       |             | Metabolism of Other Amino Acids, Met    | 10.056 | 8.013  | 6.769  | 8.472  | 2.43E-03 | 2.06E-01 | -2.04 | 1.70  |
| <i>lpg0550</i> | hypothetical (FAD-dependent oxidoreductase)                                        |             | Named proteins of general function      | 8.734  | 5.034  | 12.321 | 6.010  | 6.54E-02 | 6.82E-05 | -3.70 | -6.31 |
| <i>lpg0550</i> | hypothetical (FAD-dependent oxidoreductase)                                        |             | Named proteins of general function      | 8.910  | 7.664  | 11.497 | 6.055  | 1.51E-01 | 8.60E-03 | -1.25 | -5.44 |
| <i>lpg0551</i> | 1-acyl-sn-glycerol-3-phosphate acetyltransferase                                   | <i>plsC</i> | Metabolism of Complex Lipids            | 10.239 | 8.061  | 9.612  | 9.529  | 4.41E-02 | 8.69E-01 | -2.18 | -0.08 |
| <i>lpg0551</i> | 1-acyl-sn-glycerol-3-phosphate acetyltransferase                                   | <i>plsC</i> | Metabolism of Complex Lipids            | 9.637  | 8.458  | 9.627  | 10.209 | 3.05E-01 | 1.14E-03 | -1.18 | 0.58  |
| <i>lpg0552</i> | suppressor of GroEL (SugE) chaperonin?, SMR (small di <i>sugE</i> )                |             | Transport and binding, Protein fate / h | 11.094 | 10.507 | 10.889 | 9.734  | 4.26E-01 | 1.62E-01 | -0.59 | -1.16 |
| <i>lpg0552</i> | suppressor of GroEL (SugE) chaperonin?, SMR (small di <i>sugE</i> )                |             | Transport and binding, Protein fate / h | 11.167 | 11.125 | 10.847 | 10.862 | 9.53E-01 | 9.80E-01 | -0.04 | 0.02  |
| <i>lpg0553</i> | aminoglycoside phosphotransferase                                                  |             | Named proteins of general function      | 9.937  | 10.088 | 11.707 | 10.427 | 6.98E-01 | 3.47E-03 | 0.15  | -1.28 |
| <i>lpg0553</i> | aminoglycoside phosphotransferase                                                  |             | Named proteins of general function      | 10.083 | 9.776  | 11.541 | 10.357 | 6.98E-01 | 3.25E-02 | -0.31 | -1.18 |
| <i>lpg0554</i> | DNA-damage inducible protein P (DNA polymerase IV)                                 | <i>dinP</i> | Nucleotide Metabolism, Replication an   | 6.590  | 6.766  | 7.882  | 7.363  | 8.36E-01 | 5.24E-01 | 0.18  | -0.52 |
| <i>lpg0554</i> | DNA-damage inducible protein P (DNA polymerase IV)                                 | <i>dinP</i> | Nucleotide Metabolism, Replication an   | 7.340  | 6.839  | 7.492  | 9.633  | 7.04E-01 | 7.54E-02 | -0.50 | 2.14  |
| <i>lpg0555</i> | tRNA-Gly                                                                           |             | tRNA                                    | 13.028 | 12.636 | 11.398 | 12.758 | 6.64E-01 | 5.29E-01 | -0.39 | 1.36  |
| <i>lpg0555</i> | tRNA-Gly                                                                           |             | tRNA                                    | 12.972 | 12.808 | 11.219 | 13.653 | 8.30E-01 | 7.77E-02 | -0.16 | 2.43  |
| <i>lpg0556</i> | hypothetical                                                                       |             | Unknown / hypothetical proteins         | 7.916  | 7.638  | 8.668  | 8.612  | 6.51E-01 | 8.87E-01 | -0.28 | -0.06 |
| <i>lpg0556</i> | hypothetical                                                                       |             | Unknown / hypothetical proteins         | 8.587  | 8.511  | 8.849  | 9.304  | 8.50E-01 | 8.05E-02 | -0.08 | 0.45  |
| <i>lpg0557</i> | formamidopyrimidine DNA glycosylase                                                | <i>mutM</i> | DNA/RNA degradation / restriction       | 11.830 | 10.682 | 12.210 | 11.911 | 3.43E-03 | 1.73E-01 | -1.15 | -0.30 |
| <i>lpg0557</i> | formamidopyrimidine DNA glycosylase                                                | <i>mutM</i> | DNA/RNA degradation / restriction       | 11.847 | 10.543 | 12.177 | 11.959 | 2.40E-03 | 3.54E-01 | -1.30 | -0.22 |
| <i>lpg0558</i> | stearoyl-CoA-9-desaturase (fatty acid desaturase, type 2:fatty acid de             |             | Lipid Metabolism                        | 13.258 | 13.777 | 14.124 | 12.386 | 2.47E-01 | 1.68E-02 | 0.52  | -1.74 |
| <i>lpg0558</i> | stearoyl-CoA-9-desaturase (fatty acid desaturase, type 2:fatty acid de             |             | Lipid Metabolism                        | 13.246 | 13.191 | 14.107 | 12.710 | 8.88E-01 | 1.61E-03 | -0.05 | -1.40 |
| <i>lpg0559</i> | small ORF (132aa)                                                                  |             | ORFs of unknown function (unique)       | 12.539 | 13.666 | 11.329 | 12.579 | 1.11E-01 | 7.73E-02 | 1.13  | 1.25  |
| <i>lpg0559</i> | small ORF (132aa)                                                                  |             | ORFs of unknown function (unique)       | 12.616 | 13.221 | 11.222 | 12.549 | 5.19E-01 | 5.28E-02 | 0.60  | 1.33  |
| <i>lpg0560</i> | acetyoacetyl CoA reductase                                                         | <i>phaB</i> | Carbohydrate Metabolism                 | 13.652 | 13.512 | 14.493 | 12.773 | 5.13E-01 | 1.57E-04 | -0.14 | -1.72 |
| <i>lpg0560</i> | acetyoacetyl CoA reductase                                                         | <i>phaB</i> | Carbohydrate Metabolism                 | 13.634 | 13.487 | 14.481 | 12.834 | 4.64E-01 | 1.37E-04 | -0.15 | -1.65 |
| <i>lpg0561</i> | acetyoacetyl CoA reductase                                                         | <i>phaB</i> | Carbohydrate Metabolism                 | 10.772 | 11.578 | 10.571 | 10.229 | 1.57E-02 | 4.99E-01 | 0.81  | -0.34 |
| <i>lpg0561</i> | acetyoacetyl CoA reductase                                                         | <i>phaB</i> | Carbohydrate Metabolism                 | 10.676 | 10.705 | 10.650 | 10.490 | 9.45E-01 | 6.87E-01 | 0.03  | -0.16 |
| <i>lpg0562</i> | hypothetical COG5394                                                               |             | Unknown / hypothetical proteins         | 9.441  | 11.326 | 8.870  | 10.991 | 3.36E-03 | 4.49E-04 | 1.89  | 2.12  |
| <i>lpg0562</i> | hypothetical COG5394                                                               |             | Unknown / hypothetical proteins         | 9.275  | 11.483 | 8.709  | 10.920 | 4.41E-04 | 7.19E-05 | 2.21  | 2.21  |
| <i>lpg0563</i> | ORF                                                                                |             | ORFs of unknown function (unique)       | 8.266  | 11.164 | 8.527  | 8.495  | 4.12E-04 | 9.69E-01 | 2.90  | -0.03 |
| <i>lpg0563</i> | ORF                                                                                |             | ORFs of unknown function (unique)       | 8.322  | 10.992 | 8.213  | 8.941  | 3.52E-04 | 4.37E-01 | 2.67  | 0.73  |
| <i>lpg0564</i> | hypothetical protein                                                               |             | Unknown / hypothetical proteins         | 9.844  | 10.850 | 9.587  | 10.170 | 2.06E-02 | 1.03E-01 | 1.01  | 0.58  |
| <i>lpg0564</i> | hypothetical protein                                                               |             | Unknown / hypothetical proteins         | 10.033 | 10.380 | 9.269  | 10.336 | 2.34E-01 | 1.56E-01 | 0.35  | 1.07  |
| <i>lpg0565</i> | spore maturation protein B                                                         |             | Chemotaxis / motility / cell division   | 11.377 | 11.204 | 12.003 | 10.956 | 4.46E-01 | 1.83E-02 | -0.17 | -1.05 |
| <i>lpg0565</i> | spore maturation protein B                                                         |             | Chemotaxis / motility / cell division   | 11.289 | 11.539 | 12.036 | 11.341 | 6.04E-01 | 2.17E-01 | 0.25  | -0.69 |
| <i>lpg0566</i> | spore maturation protein A                                                         | <i>spmB</i> | Chemotaxis / motility / cell division   | 10.160 | 10.559 | 9.842  | 10.376 | 4.02E-01 | 4.12E-01 | 0.40  | 0.53  |
| <i>lpg0566</i> | spore maturation protein A                                                         | <i>spmB</i> | Chemotaxis / motility / cell division   | 10.174 | 10.561 | 9.284  | 10.521 | 4.58E-01 | 1.30E-01 | 0.39  | 1.24  |
| <i>lpg0567</i> | peptidase (M23/M37 family)                                                         |             | Protein fate / hydrolases / secretion   | 10.917 | 10.055 | 10.196 | 11.309 | 1.34E-01 | 1.05E-02 | -0.86 | 1.11  |
| <i>lpg0567</i> | peptidase (M23/M37 family)                                                         |             | Protein fate / hydrolases / secretion   | 10.652 | 10.819 | 10.374 | 11.832 | 7.77E-01 | 8.17E-03 | 0.17  | 1.46  |
| <i>lpg0568</i> | tyrosyl tRNA synthetase                                                            | <i>tyrS</i> | Amino Acid Metabolism, Translation      | 10.285 | 12.612 | 9.954  | 11.992 | 3.32E-05 | 3.16E-03 | 2.33  | 2.04  |
| <i>lpg0568</i> | tyrosyl tRNA synthetase                                                            | <i>tyrS</i> | Amino Acid Metabolism, Translation      | 10.384 | 12.606 | 9.557  | 11.976 | 1.96E-05 | 1.77E-03 | 2.22  | 2.42  |
| <i>lpg0577</i> | transferase (carbonic anhydrase/transferase/acetyltransferase) <i>yrdA</i>         |             | Named proteins of general function      | 10.959 | 11.520 | 11.489 | 11.923 | 3.28E-01 | 3.47E-01 | 0.56  | 0.43  |
| <i>lpg0577</i> | transferase (carbonic anhydrase/transferase/acetyltransferase) <i>yrdA</i>         |             | Named proteins of general function      | 10.851 | 11.727 | 11.368 | 12.106 | 3.93E-02 | 2.42E-02 | 0.88  | 0.74  |
| <i>lpg0578</i> | glutathione reductase (glutathione oxidoreductase)                                 | <i>gor</i>  | Amino Acid Metabolism, Metabolism o     | 13.082 | 12.812 | 13.223 | 12.866 | 1.29E-01 | 4.02E-02 | -0.27 | -0.36 |
| <i>lpg0578</i> | glutathione reductase (glutathione oxidoreductase)                                 | <i>gor</i>  | Amino Acid Metabolism, Metabolism o     | 12.960 | 12.802 | 13.123 | 12.840 | 3.68E-01 | 4.56E-02 | -0.16 | -0.28 |
| <i>lpg0579</i> | ORF                                                                                |             | ORFs of unknown function (unique)       | 8.078  | 10.121 | 8.198  | 10.380 | 9.40E-02 | 5.66E-02 | 2.04  | 2.18  |
| <i>lpg0579</i> | ORF                                                                                |             | ORFs of unknown function (unique)       | 10.653 | 10.797 | 9.178  | 13.071 | 7.93E-01 | 3.63E-04 | 0.14  | 3.89  |
| <i>lpg0580</i> | adenosine deaminase                                                                | <i>add</i>  | Nucleotide Metabolism                   | 12.001 | 13.075 | 10.137 | 13.265 | 7.71E-02 | 2.88E-03 | 1.07  | 3.13  |
| <i>lpg0580</i> | adenosine deaminase                                                                | <i>add</i>  | Nucleotide Metabolism                   | 11.916 | 13.111 | 10.158 | 13.341 | 4.27E-02 | 1.33E-03 | 1.19  | 3.18  |
| <i>lpg0581</i> | hypothetical                                                                       |             | Unknown / hypothetical proteins         | 10.457 | 9.192  | 8.850  | 9.458  | 9.08E-02 | 3.19E-01 | -1.27 | 0.61  |
| <i>lpg0581</i> | hypothetical                                                                       |             | Unknown / hypothetical proteins         | 10.668 | 9.742  | 9.101  | 9.717  | 5.78E-02 | 2.46E-01 | -0.93 | 0.62  |
| <i>lpg0582</i> | small ORF (159aa)                                                                  |             | ORFs of unknown function (unique)       | 10.371 | 9.231  | 10.458 | 8.854  | 1.11E-01 | 2.28E-02 | -1.14 | -1.60 |
| <i>lpg0582</i> | small ORF (159aa)                                                                  |             | ORFs of unknown function (unique)       | 10.595 | 9.066  | 10.093 | 8.617  | 3.17E-03 | 6.06E-02 | -1.53 | -1.48 |
| <i>lpg0583</i> | phosphate transporter (phosphate permease)                                         |             | Transport and binding                   | 10.438 | 10.771 | 10.144 | 10.681 | 4.14E-02 | 3.30E-01 | 0.33  | 0.54  |
| <i>lpg0583</i> | phosphate transporter (phosphate permease)                                         |             | Transport and binding                   | 10.173 | 10.797 | 9.864  | 10.491 | 8.60E-02 | 3.43E-01 | 0.62  | 0.63  |
| <i>lpg0584</i> | hypothetical (phosphate transport regulator?)                                      |             | Unknown / hypothetical proteins         | 11.757 | 12.592 | 10.548 | 12.988 | 5.44E-02 | 2.70E-04 | 0.84  | 2.44  |
| <i>lpg0584</i> | hypothetical (phosphate transport regulator?)                                      |             | Unknown / hypothetical proteins         | 11.436 | 12.680 | 10.364 | 13.075 | 1.03E-02 | 5.14E-05 | 1.24  | 2.71  |

|                |                                                                           |              |                                         |        |        |        |        |          |          |       |       |
|----------------|---------------------------------------------------------------------------|--------------|-----------------------------------------|--------|--------|--------|--------|----------|----------|-------|-------|
| <i>lpg0585</i> | conserved hypothetical protein                                            |              | Unknown / hypothetical proteins         | 10.559 | 8.666  | 12.724 | 8.732  | 6.68E-02 | 1.13E-02 | -1.89 | -3.99 |
| <i>lpg0585</i> | conserved hypothetical protein                                            |              | Unknown / hypothetical proteins         | 10.466 | 9.532  | 12.761 | 9.967  | 4.55E-02 | 2.33E-04 | -0.93 | -2.79 |
| <i>lpg0586</i> | transcriptional regulator, alginate biosynthesis?                         |              | Transcription factors / DNA binding prc | 9.651  | 9.260  | 13.488 | 9.392  | 5.53E-01 | 1.43E-03 | -0.39 | -4.10 |
| <i>lpg0586</i> | transcriptional regulator, alginate biosynthesis?                         |              | Transcription factors / DNA binding prc | 9.575  | 10.768 | 13.519 | 10.124 | 3.17E-01 | 2.10E-02 | 1.19  | -3.40 |
| <i>lpg0587</i> | hypothetical (Holliday junction resolvase, endonuclease i <i>yggF</i>     |              | Replication and Repair                  | 8.556  | 7.688  | 9.409  | 9.675  | 1.00E-01 | 7.77E-01 | -0.87 | 0.27  |
| <i>lpg0587</i> | hypothetical (Holliday junction resolvase, endonuclease i <i>yggF</i>     |              | Replication and Repair                  | 8.556  | 8.476  | 9.321  | 10.106 | 9.48E-01 | 3.53E-01 | -0.08 | 0.79  |
| <i>lpg0588</i> | aspartate carbamoyltransferase                                            | <i>pyrB</i>  | Nucleotide Metabolism, Amino Acid Me    | 10.518 | 10.919 | 10.836 | 10.024 | 2.10E-01 | 9.93E-02 | 0.40  | -0.81 |
| <i>lpg0588</i> | aspartate carbamoyltransferase                                            | <i>pyrB</i>  | Nucleotide Metabolism, Amino Acid Me    | 10.467 | 11.109 | 11.013 | 10.253 | 2.83E-02 | 1.25E-02 | 0.64  | -0.76 |
| <i>lpg0589</i> | small ORF (128aa)                                                         |              | ORFs of unknown function (unique)       | 8.776  | 6.681  | 13.129 | 8.222  | 1.22E-01 | 5.11E-07 | -2.10 | -4.91 |
| <i>lpg0589</i> | small ORF (128aa)                                                         |              | ORFs of unknown function (unique)       | 9.086  | 7.582  | 12.007 | 8.543  | 1.16E-01 | 2.89E-02 | -1.50 | -3.46 |
| <i>lpg0590</i> | competence related protein ComM (Mg(2+) chelatase) (t) <i>comM</i>        |              | Transport and binding, Signal transduc  | 8.166  | 9.008  | 9.433  | 7.898  | 1.71E-01 | 8.02E-02 | 0.84  | -1.53 |
| <i>lpg0590</i> | competence related protein ComM (Mg(2+) chelatase) (t) <i>comM</i>        |              | Transport and binding, Signal transduc  | 8.125  | 8.973  | 9.290  | 8.585  | 2.08E-01 | 2.67E-01 | 0.85  | -0.70 |
| <i>lpg0591</i> | hypothetical COG2960                                                      |              | Unknown / hypothetical proteins         | 11.775 | 11.546 | 10.399 | 10.787 | 5.64E-01 | 2.79E-01 | -0.23 | 0.39  |
| <i>lpg0591</i> | hypothetical COG2960                                                      |              | Unknown / hypothetical proteins         | 11.699 | 11.767 | 10.264 | 10.796 | 9.15E-01 | 2.34E-01 | 0.07  | 0.53  |
| <i>lpg0592</i> | nitrogen regulatory P-II transcription regulator (nitrogen ri <i>glnK</i> |              | Transcription factors / DNA binding prc | 9.429  | 11.622 | 8.720  | 10.900 | 1.23E-04 | 1.06E-04 | 2.19  | 2.18  |
| <i>lpg0592</i> | nitrogen regulatory P-II transcription regulator (nitrogen ri <i>glnK</i> |              | Transcription factors / DNA binding prc | 9.621  | 11.032 | 8.764  | 10.967 | 1.11E-02 | 8.62E-03 | 1.41  | 2.20  |
| <i>lpg0593</i> | 5-formyltetrahydrofolate cyclo-ligase                                     |              | Metabolism of Cofactors and Vitamins    | 10.133 | 9.535  | 9.246  | 9.592  | 7.51E-02 | 3.91E-01 | -0.60 | 0.35  |
| <i>lpg0593</i> | 5-formyltetrahydrofolate cyclo-ligase                                     |              | Metabolism of Cofactors and Vitamins    | 9.978  | 9.403  | 8.788  | 9.751  | 1.35E-02 | 1.04E-01 | -0.57 | 0.96  |
| <i>lpg0594</i> | ORF                                                                       |              | ORFs of unknown function (unique)       | 12.809 | 12.704 | 11.602 | 13.991 | 8.51E-01 | 4.75E-04 | -0.11 | 2.39  |
| <i>lpg0594</i> | ORF                                                                       |              | ORFs of unknown function (unique)       | 12.790 | 12.685 | 11.433 | 13.962 | 8.64E-01 | 9.37E-04 | -0.10 | 2.53  |
| <i>lpg0595</i> | 4-amino-4-deoxychorismate lyase (branched chain amino acid amino          |              | Amino Acid Metabolism                   | 10.843 | 11.364 | 9.480  | 12.902 | 4.85E-01 | 1.49E-05 | 0.52  | 3.42  |
| <i>lpg0595</i> | 4-amino-4-deoxychorismate lyase (branched chain amino acid amino          |              | Amino Acid Metabolism                   | 10.604 | 10.802 | 9.209  | 12.831 | 7.80E-01 | 8.64E-05 | 0.20  | 3.62  |
| <i>lpg0596</i> | conserved hypothetical protein                                            |              | Unknown / hypothetical proteins         | 11.978 | 11.141 | 12.052 | 11.329 | 5.69E-02 | 9.25E-02 | -0.84 | -0.72 |
| <i>lpg0596</i> | conserved hypothetical protein                                            |              | Unknown / hypothetical proteins         | 11.881 | 10.658 | 12.019 | 11.403 | 1.32E-01 | 1.65E-01 | -1.22 | -0.62 |
| <i>lpg0597</i> | 2-acylglycerophosphoethanolamine acyltransferase                          | <i>aas</i>   | Lipid Metabolism                        | 8.859  | 6.345  | 8.549  | 8.279  | 2.30E-03 | 5.15E-01 | -2.51 | -0.27 |
| <i>lpg0597</i> | 2-acylglycerophosphoethanolamine acyltransferase                          | <i>aas</i>   | Lipid Metabolism                        | 8.815  | 9.155  | 8.049  | 9.260  | 8.10E-01 | 3.92E-01 | 0.34  | 1.21  |
| <i>lpg0598</i> | small ORF (139aa) (hypothetical?) COG4446                                 |              | Unknown / hypothetical proteins         | 9.656  | 8.540  | 9.321  | 8.717  | 1.46E-01 | 2.45E-01 | -1.12 | -0.60 |
| <i>lpg0598</i> | small ORF (139aa) (hypothetical?) COG4446                                 |              | Unknown / hypothetical proteins         | 9.835  | 9.021  | 9.200  | 9.040  | 2.54E-01 | 7.40E-01 | -0.81 | -0.16 |
| <i>lpg0599</i> | poly-beta-hydroxybutyrate polymerase (poly(3-hydroxyalkanoate) pol        |              | Named proteins of general function      | 10.312 | 11.387 | 10.653 | 11.100 | 7.19E-03 | 2.72E-01 | 1.07  | 0.45  |
| <i>lpg0599</i> | poly-beta-hydroxybutyrate polymerase (poly(3-hydroxyalkanoate) pol        |              | Named proteins of general function      | 10.439 | 11.353 | 10.494 | 11.058 | 8.06E-03 | 1.35E-01 | 0.91  | 0.56  |
| <i>lpg0600</i> | rf2 family protein (transcriptional regulator)                            |              | Transcription factors / DNA binding prc | 11.257 | 10.680 | 10.637 | 12.001 | 1.21E-02 | 2.31E-03 | -0.58 | 1.36  |
| <i>lpg0600</i> | rf2 family protein (transcriptional regulator)                            |              | Transcription factors / DNA binding prc | 10.994 | 10.440 | 10.122 | 11.978 | 1.08E-01 | 1.29E-03 | -0.55 | 1.86  |
| <i>lpg0601</i> | ABC transporter, permease                                                 | <i>ycf24</i> | Transport and binding                   | 10.354 | 10.938 | 10.760 | 11.941 | 3.06E-02 | 1.21E-02 | 0.58  | 1.18  |
| <i>lpg0601</i> | ABC transporter, permease                                                 | <i>ycf24</i> | Transport and binding                   | 10.555 | 11.025 | 10.633 | 11.916 | 7.06E-02 | 7.04E-03 | 0.47  | 1.28  |
| <i>lpg0602</i> | ATP transporter, ABC binding component, ATP-binding protein               |              | Transport and binding                   | 11.742 | 11.970 | 11.298 | 13.019 | 4.01E-01 | 1.86E-04 | 0.23  | 1.72  |
| <i>lpg0602</i> | ATP transporter, ABC binding component, ATP-binding protein               |              | Transport and binding                   | 11.716 | 11.942 | 11.223 | 13.003 | 3.86E-01 | 1.49E-04 | 0.23  | 1.78  |
| <i>lpg0603</i> | ABC transporter, permease component                                       |              | Transport and binding                   | 10.985 | 10.584 | 10.746 | 12.044 | 3.57E-01 | 6.96E-03 | -0.40 | 1.30  |
| <i>lpg0603</i> | ABC transporter, permease component                                       |              | Transport and binding                   | 10.974 | 10.457 | 10.639 | 12.020 | 2.47E-01 | 9.90E-04 | -0.52 | 1.38  |
| <i>lpg0604</i> | aminotransferase (cystein desulfurase, selenocysteine lyase)              |              | Metabolism of Other Amino Acids         | 10.328 | 9.810  | 10.212 | 10.878 | 8.97E-02 | 9.70E-02 | -0.52 | 0.67  |
| <i>lpg0604</i> | aminotransferase (cystein desulfurase, selenocysteine lyase)              |              | Metabolism of Other Amino Acids         | 10.291 | 10.312 | 10.289 | 11.172 | 9.55E-01 | 4.88E-03 | 0.02  | 0.88  |
| <i>lpg0605</i> | nitrogen fixation protein (Fe-S cluster formation) NifU                   |              | Energy Metabolism                       | 10.901 | 10.672 | 11.259 | 11.793 | 2.23E-01 | 5.80E-02 | -0.23 | 0.53  |
| <i>lpg0605</i> | nitrogen fixation protein (Fe-S cluster formation) NifU                   |              | Energy Metabolism                       | 10.790 | 10.959 | 11.311 | 11.867 | 6.48E-01 | 2.58E-02 | 0.17  | 0.56  |
| <i>lpg0606</i> | hypothetical (dTDP-4-keto-L-rhamnose reductase, component of ring         |              | Nucleotide Metabolism                   | 11.477 | 11.538 | 11.381 | 12.252 | 8.13E-01 | 2.81E-03 | 0.06  | 0.87  |
| <i>lpg0606</i> | hypothetical (dTDP-4-keto-L-rhamnose reductase, component of ring         |              | Nucleotide Metabolism                   | 11.432 | 11.479 | 11.331 | 12.258 | 8.35E-01 | 5.06E-04 | 0.05  | 0.93  |
| <i>lpg0607</i> | lysyl tRNA synthetase                                                     |              | Amino Acid Metabolism, Translation      | 9.136  | 9.034  | 7.947  | 9.833  | 7.88E-01 | 1.03E-02 | -0.10 | 1.89  |
| <i>lpg0607</i> | lysyl tRNA synthetase                                                     |              | Amino Acid Metabolism, Translation      | 9.025  | 9.093  | 7.654  | 9.649  | 8.75E-01 | 2.00E-02 | 0.07  | 2.00  |
| <i>lpg0608</i> | hypothetical (SAM-dependent methyltransferase?)                           |              | Unknown / hypothetical proteins         | 9.958  | 9.288  | 8.019  | 11.200 | 8.54E-02 | 4.13E-04 | -0.67 | 3.18  |
| <i>lpg0608</i> | hypothetical (SAM-dependent methyltransferase?)                           |              | Unknown / hypothetical proteins         | 9.631  | 9.092  | 7.770  | 11.152 | 3.21E-01 | 1.27E-02 | -0.54 | 3.38  |
| <i>lpg0609</i> | alanyl tRNA synthetase                                                    | <i>alaS</i>  | DNA/RNA degradation / restriction, Trz  | 8.916  | 12.714 | 8.224  | 11.406 | 1.84E-07 | 1.58E-05 | 3.80  | 3.18  |
| <i>lpg0609</i> | alanyl tRNA synthetase                                                    | <i>alaS</i>  | DNA/RNA degradation / restriction, Trz  | 8.407  | 12.594 | 7.060  | 10.871 | 1.52E-06 | 8.48E-04 | 4.19  | 3.81  |
| <i>lpg0610</i> | major facilitator family transporter (multidrug efflux transporter)       |              | Transport and binding                   | 10.337 | 12.843 | 10.894 | 11.081 | 1.88E-06 | 5.57E-01 | 2.51  | 0.19  |
| <i>lpg0610</i> | major facilitator family transporter (multidrug efflux transporter)       |              | Transport and binding                   | 10.376 | 12.849 | 10.761 | 11.078 | 1.28E-06 | 3.68E-01 | 2.47  | 0.32  |
| <i>lpg0611</i> | metal ion transporter (magnesium and cobalt efflux protein) (hemolys      |              | Transport and binding                   | 11.262 | 10.660 | 10.281 | 10.826 | 1.72E-01 | 9.22E-02 | -0.60 | 0.54  |
| <i>lpg0611</i> | metal ion transporter (magnesium and cobalt efflux protein) (hemolys      |              | Transport and binding                   | 11.206 | 11.065 | 10.615 | 11.410 | 8.08E-01 | 1.18E-01 | -0.14 | 0.80  |
| <i>lpg0612</i> | alcohol dehydrogenase (NADP-dependent, zinc-type) (oxidoreductas          |              | Carbohydrate Metabolism, Metabolism     | 11.034 | 12.759 | 11.642 | 11.733 | 8.97E-06 | 7.23E-01 | 1.72  | 0.09  |
| <i>lpg0612</i> | alcohol dehydrogenase (NADP-dependent, zinc-type) (oxidoreductas          |              | Carbohydrate Metabolism, Metabolism     | 10.949 | 12.847 | 11.613 | 11.836 | 2.20E-07 | 3.20E-01 | 1.90  | 0.22  |
| <i>lpg0613</i> | ORF cytochrome c1 precursor?                                              |              | Unknown / hypothetical proteins         | 11.955 | 12.459 | 10.162 | 11.599 | 4.05E-01 | 2.26E-02 | 0.50  | 1.44  |
| <i>lpg0613</i> | ORF cytochrome c1 precursor?                                              |              | Unknown / hypothetical proteins         | 11.910 | 12.403 | 9.986  | 11.665 | 4.66E-01 | 1.33E-02 | 0.49  | 1.68  |
| <i>lpg0614</i> | hypothetical                                                              |              | Unknown / hypothetical proteins         | 9.850  | 8.497  | 10.903 | 8.961  | 1.94E-02 | 1.02E-03 | -1.35 | -1.94 |
| <i>lpg0614</i> | hypothetical                                                              |              | Unknown / hypothetical proteins         | 9.910  | 8.735  | 10.791 | 9.512  | 2.89E-02 | 6.87E-02 | -1.17 | -1.28 |
| <i>lpg0615</i> | polypeptide deformylase (formylmethionine deformylase)                    |              | Translation                             | 10.480 | 9.044  | 11.339 | 9.786  | 3.10E-01 | 2.96E-03 | -1.44 | -1.55 |
| <i>lpg0615</i> | polypeptide deformylase (formylmethionine deformylase)                    |              | Translation                             | 10.547 | 9.465  | 10.906 | 10.018 | 1.65E-01 | 5.00E-02 | -1.08 | -0.89 |
| <i>lpg0616</i> | GTP cyclohydrolase I PLUS perhaps regulatory protein: fused protein       |              | Named proteins of general function      | 9.372  | 10.471 | 8.548  | 9.282  | 3.34E-04 | 2.68E-01 | 1.10  | 0.73  |
| <i>lpg0616</i> | GTP cyclohydrolase I PLUS perhaps regulatory protein: fused protein       |              | Named proteins of general function      | 9.636  | 10.357 | 8.985  | 9.806  | 3.61E-02 | 2.40E-01 | 0.72  | 0.82  |

|                |                                                                         |             |                                           |        |        |        |        |          |          |       |       |
|----------------|-------------------------------------------------------------------------|-------------|-------------------------------------------|--------|--------|--------|--------|----------|----------|-------|-------|
| <i>lpg0617</i> | major outer membrane protein                                            |             | Toxin production / other pathogen func    | 10.095 | 10.132 | 9.841  | 9.280  | 9.19E-01 | 3.42E-01 | 0.04  | -0.56 |
| <i>lpg0617</i> | major outer membrane protein                                            |             | Toxin production / other pathogen func    | 9.805  | 10.033 | 9.383  | 9.591  | 6.83E-01 | 7.10E-01 | 0.23  | 0.21  |
| <i>lpg0618</i> | 3-methyladenine DNA glycosylase                                         | <i>tag</i>  | DNA/RNA degradation / restriction         | 10.183 | 9.187  | 7.652  | 9.122  | 7.64E-04 | 5.70E-02 | -1.00 | 1.47  |
| <i>lpg0618</i> | 3-methyladenine DNA glycosylase                                         | <i>tag</i>  | DNA/RNA degradation / restriction         | 10.033 | 9.805  | 7.817  | 10.049 | 6.87E-01 | 6.97E-02 | -0.23 | 2.23  |
| <i>lpg0619</i> | glyoxylase (hydroxylase) COG3324                                        |             | Named proteins of general function        | 10.517 | 9.776  | 10.595 | 9.812  | 1.31E-01 | 8.26E-02 | -0.74 | -0.78 |
| <i>lpg0619</i> | glyoxylase (hydroxylase) COG3324                                        |             | Named proteins of general function        | 10.344 | 10.186 | 10.663 | 10.354 | 5.26E-01 | 3.74E-01 | -0.16 | -0.31 |
| <i>lpg0620</i> | conserved hypothetical protein                                          |             | Unknown / hypothetical proteins           | 7.992  | 7.471  | 10.809 | 6.291  | 5.52E-01 | 1.23E-03 | -0.52 | -4.52 |
| <i>lpg0620</i> | conserved hypothetical protein                                          |             | Unknown / hypothetical proteins           | 8.743  | 9.014  | 11.884 | 8.286  | 7.98E-01 | 2.84E-03 | 0.27  | -3.60 |
| <i>lpg0621</i> | SidA                                                                    | <i>sidA</i> | Toxin production / other pathogen func    | 9.578  | 11.116 | 10.935 | 10.866 | 8.76E-03 | 9.01E-01 | 1.54  | -0.07 |
| <i>lpg0621</i> | SidA                                                                    | <i>sidA</i> | Toxin production / other pathogen func    | 9.490  | 11.927 | 10.949 | 11.532 | 3.53E-04 | 3.01E-01 | 2.44  | 0.58  |
| <i>lpg0622</i> | transmembrane protein                                                   |             | Unknown / hypothetical proteins           | 9.409  | 7.051  | 9.283  | 7.491  | 3.37E-03 | 3.53E-02 | -2.36 | -1.79 |
| <i>lpg0622</i> | transmembrane protein                                                   |             | Unknown / hypothetical proteins           | 9.173  | 6.828  | 9.113  | 8.629  | 2.73E-02 | 1.61E-01 | -2.34 | -0.48 |
| <i>lpg0623</i> | hypothetical                                                            |             | Unknown / hypothetical proteins           | 9.849  | 9.023  | 12.223 | 7.516  | 2.92E-01 | 5.68E-03 | -0.83 | -4.71 |
| <i>lpg0623</i> | hypothetical                                                            |             | Unknown / hypothetical proteins           | 10.002 | 8.880  | 12.270 | 9.232  | 1.26E-01 | 1.42E-03 | -1.12 | -3.04 |
| <i>lpg0624</i> | small ORF (125aa)                                                       |             | ORFs of unknown function (unique)         | 11.765 | 11.758 | 11.157 | 12.305 | 9.68E-01 | 2.24E-04 | -0.01 | 1.15  |
| <i>lpg0624</i> | small ORF (125aa)                                                       |             | ORFs of unknown function (unique)         | 11.773 | 11.725 | 11.091 | 12.357 | 8.17E-01 | 1.05E-04 | -0.05 | 1.27  |
| <i>lpg0625</i> | expressed protein                                                       |             | Named proteins of general function        | 10.509 | 9.141  | 13.885 | 9.691  | 1.41E-01 | 5.64E-04 | -1.37 | -4.19 |
| <i>lpg0625</i> | expressed protein                                                       |             | Named proteins of general function        | 10.291 | 9.118  | 13.857 | 10.010 | 3.47E-01 | 9.71E-04 | -1.17 | -3.85 |
| <i>lpg0626</i> | DNA uptake/competence protein ComA (DNA internalization-related c       |             | Transport and binding                     | 10.629 | 12.364 | 11.026 | 8.887  | 1.30E-04 | 1.46E-03 | 1.74  | -2.14 |
| <i>lpg0626</i> | DNA uptake/competence protein ComA (DNA internalization-related c       |             | Transport and binding                     | 10.359 | 12.129 | 11.188 | 9.442  | 5.25E-04 | 3.38E-03 | 1.77  | -1.75 |
| <i>lpg0627</i> | type IV pilin (competence and adherence associated pilir <i>pilE3</i>   |             | Transport and binding                     | 9.906  | 9.562  | 12.800 | 9.320  | 6.67E-01 | 4.78E-04 | -0.34 | -3.48 |
| <i>lpg0627</i> | type IV pilin (competence and adherence associated pilir <i>pilE3</i>   |             | Transport and binding                     | 9.979  | 9.382  | 12.834 | 10.075 | 4.75E-01 | 1.30E-03 | -0.60 | -2.76 |
| <i>lpg0628</i> | type IV fimbrial biogenesis PilY1-related protein                       |             | Transport and binding                     | 9.101  | 9.141  | 11.164 | 9.130  | 9.41E-01 | 5.10E-04 | 0.04  | -2.03 |
| <i>lpg0628</i> | type IV fimbrial biogenesis PilY1-related protein                       |             | Transport and binding                     | 8.852  | 9.408  | 11.123 | 9.602  | 4.55E-01 | 8.39E-03 | 0.56  | -1.52 |
| <i>lpg0629</i> | Tfp pilus assembly protein PilX?                                        |             | Named proteins of general function        | 9.165  | 9.353  | 11.913 | 8.877  | 7.11E-01 | 1.01E-03 | 0.19  | -3.04 |
| <i>lpg0629</i> | Tfp pilus assembly protein PilX?                                        |             | Named proteins of general function        | 10.299 | 9.946  | 12.218 | 9.867  | 4.84E-01 | 8.51E-05 | -0.35 | -2.35 |
| <i>lpg0630</i> | hypothetical (type IV fimbrial biogenesis PilW related protein, transme |             | Transport and binding                     | 7.284  | 8.981  | 10.425 | 8.648  | 1.21E-01 | 1.04E-01 | 1.70  | -1.78 |
| <i>lpg0630</i> | hypothetical (type IV fimbrial biogenesis PilW related protein, transme |             | Transport and binding                     | 7.502  | 9.393  | 10.720 | 10.046 | 3.61E-01 | 6.99E-01 | 1.89  | -0.67 |
| <i>lpg0631</i> | type IV fimbrial biogenesis protein PilV                                |             | Transport and binding                     | 10.322 | 9.134  | 12.436 | 8.115  | 1.58E-01 | 2.61E-04 | -1.19 | -4.32 |
| <i>lpg0631</i> | type IV fimbrial biogenesis protein PilV                                |             | Transport and binding                     | 10.334 | 10.595 | 13.209 | 10.466 | 8.30E-01 | 4.31E-02 | 0.26  | -2.74 |
| <i>lpg0632</i> | type IV pre-pilin (type IV fimbrial pilin; fimbrial biogenesis protein) |             | Transport and binding                     | 8.963  | 8.469  | 13.192 | 6.815  | 7.34E-01 | 5.15E-03 | -0.49 | -6.38 |
| <i>lpg0632</i> | type IV pre-pilin (type IV fimbrial pilin; fimbrial biogenesis protein) |             | Transport and binding                     | 9.710  | 7.534  | 13.089 | 7.693  | 4.02E-02 | 7.96E-04 | -2.18 | -5.40 |
| <i>lpg0633</i> | polysaccharide deacetylase (peptidoglycan N-acetylglucosamine dea       |             | Metabolism of Complex Carbohydrate:       | 10.520 | 8.003  | 9.752  | 8.353  | 1.13E-03 | 2.76E-01 | -2.52 | -1.40 |
| <i>lpg0633</i> | polysaccharide deacetylase (peptidoglycan N-acetylglucosamine dea       |             | Metabolism of Complex Carbohydrate:       | 10.344 | 8.100  | 8.208  | 7.983  | 2.87E-04 | 8.45E-01 | -2.24 | -0.22 |
| <i>lpg0634</i> | ORF                                                                     |             | ORFs of unknown function (unique)         | 14.256 | 15.093 | 13.421 | 12.561 | 2.96E-02 | 1.63E-02 | 0.84  | -0.86 |
| <i>lpg0634</i> | ORF                                                                     |             | ORFs of unknown function (unique)         | 14.350 | 15.184 | 13.411 | 12.582 | 5.01E-02 | 2.52E-02 | 0.83  | -0.83 |
| <i>lpg0635</i> | melitin resistance protein (dolichyl phosphate-mannose protein mann     |             | Detoxification / adaptation, Metabolism   | 9.671  | 10.184 | 10.357 | 8.661  | 3.10E-01 | 9.90E-02 | 0.51  | -1.70 |
| <i>lpg0635</i> | melitin resistance protein (dolichyl phosphate-mannose protein mann     |             | Detoxification / adaptation, Metabolism   | 9.873  | 10.482 | 10.090 | 9.470  | 3.71E-01 | 3.51E-01 | 0.61  | -0.62 |
| <i>lpg0636</i> | thymidine kinase                                                        | <i>tdk</i>  | Nucleotide Metabolism                     | 10.850 | 10.722 | 10.234 | 7.928  | 6.59E-01 | 1.83E-01 | -0.13 | -2.31 |
| <i>lpg0636</i> | thymidine kinase                                                        | <i>tdk</i>  | Nucleotide Metabolism                     | 10.731 | 10.705 | 10.512 | 9.926  | 9.62E-01 | 1.11E-01 | -0.03 | -0.59 |
| <i>lpg0637</i> | major facilitator family transporter (multidrug efflux transporter)     |             | Transport and binding                     | 11.788 | 11.878 | 11.570 | 12.365 | 6.29E-01 | 1.23E-03 | 0.09  | 0.80  |
| <i>lpg0637</i> | major facilitator family transporter (multidrug efflux transporter)     |             | Transport and binding                     | 11.972 | 11.830 | 11.388 | 12.239 | 3.90E-01 | 6.85E-04 | -0.14 | 0.85  |
| <i>lpg0638</i> | major facilitator family transporter (multidrug efflux transporter)     |             | Transport and binding                     | 10.618 | 10.711 | 10.915 | 10.636 | 6.16E-01 | 3.20E-01 | 0.09  | -0.28 |
| <i>lpg0638</i> | major facilitator family transporter (multidrug efflux transporter)     |             | Transport and binding                     | 10.793 | 11.312 | 11.156 | 11.053 | 5.69E-01 | 9.17E-01 | 0.52  | -0.10 |
| <i>lpg0639</i> | phosphopentomutase                                                      | <i>deoB</i> | Carbohydrate Metabolism, Nucleotide       | 10.686 | 10.042 | 9.625  | 11.083 | 1.10E-01 | 9.22E-02 | -0.64 | 1.46  |
| <i>lpg0639</i> | phosphopentomutase                                                      | <i>deoB</i> | Carbohydrate Metabolism, Nucleotide       | 11.230 | 11.292 | 10.358 | 12.107 | 8.82E-01 | 9.84E-04 | 0.06  | 1.75  |
| <i>lpg0640</i> | heat shock protein, HslIVU, proteasome-related peptidase <i>hslI</i>    |             | Detoxification / adaptation, Protein fate | 11.741 | 10.836 | 12.747 | 12.283 | 6.25E-02 | 1.35E-01 | -0.91 | -0.46 |
| <i>lpg0640</i> | heat shock protein, HslIVU, proteasome-related peptidase <i>hslI</i>    |             | Detoxification / adaptation, Protein fate | 11.412 | 10.363 | 12.316 | 12.077 | 5.00E-02 | 3.89E-01 | -1.05 | -0.24 |
| <i>lpg0641</i> | ATP dependent Hsl protease, ATP binding subunit (ATP t <i>hslI</i>      |             | Detoxification / adaptation, Protein fate | 12.060 | 10.962 | 12.716 | 12.725 | 7.72E-02 | 9.70E-01 | -1.10 | 0.01  |
| <i>lpg0641</i> | ATP dependent Hsl protease, ATP binding subunit (ATP t <i>hslI</i>      |             | Detoxification / adaptation, Protein fate | 11.973 | 11.019 | 12.654 | 12.777 | 9.83E-02 | 6.02E-01 | -0.95 | 0.12  |
| <i>lpg0642</i> | ORF                                                                     | <i>WipB</i> | ORFs of unknown function (unique)         | 9.910  | 9.097  | 10.929 | 8.918  | 4.87E-02 | 2.51E-02 | -0.81 | -2.01 |
| <i>lpg0642</i> | ORF                                                                     | <i>WipB</i> | ORFs of unknown function (unique)         | 10.403 | 8.663  | 10.666 | 9.757  | 5.05E-02 | 7.16E-02 | -1.74 | -0.91 |
| <i>lpg0643</i> | ribonuclease BN (tRNA processing exoribonuclease BN)                    |             | DNA/RNA degradation / restriction, Tr     | 11.279 | 9.473  | 11.307 | 9.379  | 3.41E-03 | 2.87E-03 | -1.81 | -1.93 |
| <i>lpg0643</i> | ribonuclease BN (tRNA processing exoribonuclease BN)                    |             | DNA/RNA degradation / restriction, Tr     | 11.370 | 9.731  | 11.356 | 9.524  | 5.93E-03 | 1.22E-03 | -1.64 | -1.83 |
| <i>lpg0644</i> | membrane protein?                                                       |             | Named proteins of general function        | 11.116 | 11.401 | 11.060 | 11.060 | 7.13E-01 | 7.45E-03 | 0.28  | -3.05 |
| <i>lpg0644</i> | membrane protein?                                                       |             | Named proteins of general function        | 11.244 | 11.637 | 14.155 | 11.291 | 6.04E-01 | 7.26E-03 | 0.39  | -2.86 |
| <i>lpg0645</i> | partial RtxA                                                            |             | Toxin production / other pathogen func    | 13.146 | 12.306 | 14.612 | 12.253 | 8.71E-02 | 6.89E-03 | -0.84 | -2.36 |
| <i>lpg0645</i> | partial RtxA                                                            |             | Toxin production / other pathogen func    | 13.193 | 12.350 | 14.617 | 12.488 | 5.22E-02 | 2.82E-03 | -0.84 | -2.13 |
| <i>lpg0646</i> | trp repressor binding protein                                           | <i>wrbA</i> | Transcription factors / DNA binding prc   | 10.584 | 10.306 | 10.227 | 10.974 | 1.26E-01 | 3.60E-02 | -0.28 | 0.75  |
| <i>lpg0646</i> | trp repressor binding protein                                           | <i>wrbA</i> | Transcription factors / DNA binding prc   | 10.644 | 10.245 | 10.329 | 11.151 | 6.85E-02 | 4.51E-02 | -0.40 | 0.82  |
| <i>lpg0647</i> | hypothetical (Tn5, transposase, IS4 family; ATPase component of ATI     |             | Viral functions / Phage / Transposases    | 10.899 | 9.517  | 10.172 | 9.515  | 9.00E-02 | 2.68E-01 | -1.38 | -0.66 |
| <i>lpg0647</i> | hypothetical (Tn5, transposase, IS4 family; ATPase component of ATI     |             | Viral functions / Phage / Transposases    | 11.073 | 9.500  | 10.103 | 9.795  | 2.93E-04 | 4.82E-01 | -1.57 | -0.31 |
| <i>lpg0648</i> | exodeoxyribonuclease III                                                | <i>xth</i>  | DNA/RNA degradation / restriction         | 11.302 | 10.795 | 11.623 | 11.034 | 1.39E-02 | 5.57E-02 | -0.51 | -0.59 |
| <i>lpg0648</i> | exodeoxyribonuclease III                                                | <i>xth</i>  | DNA/RNA degradation / restriction         | 11.371 | 10.982 | 11.516 | 11.092 | 1.05E-02 | 1.36E-01 | -0.39 | -0.42 |

|                |                                                                             |                 |                                        |        |        |        |        |          |          |       |       |
|----------------|-----------------------------------------------------------------------------|-----------------|----------------------------------------|--------|--------|--------|--------|----------|----------|-------|-------|
| <i>lpg0649</i> | exodeoxyribonuclease III                                                    | <i>xthA1</i>    | DNA/RNA degradation / restriction      | 8.896  | 9.434  | 11.194 | 10.147 | 1.25E-01 | 2.45E-01 | 0.54  | -1.05 |
| <i>lpg0649</i> | exodeoxyribonuclease III                                                    | <i>xthA1</i>    | DNA/RNA degradation / restriction      | 8.606  | 9.085  | 8.808  | 10.252 | 4.56E-01 | 4.00E-02 | 0.48  | 1.44  |
| <i>lpg0650</i> | 50S ribosomal protein L31                                                   | <i>rpmE</i>     | Translation                            | 14.052 | 14.610 | 11.010 | 14.649 | 5.00E-01 | 3.99E-03 | 0.56  | 3.64  |
| <i>lpg0650</i> | 50S ribosomal protein L31                                                   | <i>rpmE</i>     | Translation                            | 14.100 | 14.479 | 10.722 | 14.517 | 6.50E-01 | 4.09E-03 | 0.38  | 3.80  |
| <i>lpg0651</i> | malate oxidoreductase (malic enzyme)                                        |                 | Carbohydrate Metabolism                | 11.834 | 10.309 | 9.883  | 11.216 | 1.28E-03 | 7.44E-02 | -1.52 | 1.33  |
| <i>lpg0651</i> | malate oxidoreductase (malic enzyme)                                        |                 | Carbohydrate Metabolism                | 11.438 | 10.387 | 8.998  | 10.990 | 6.67E-02 | 1.24E-01 | -1.05 | 1.99  |
| <i>lpg0652</i> | major facilitator family transporter (multidrug efflux transporter, MFS fr) |                 | Transport and binding                  | 12.257 | 12.537 | 12.246 | 14.131 | 5.64E-01 | 1.92E-08 | 0.28  | 1.89  |
| <i>lpg0652</i> | major facilitator family transporter (multidrug efflux transporter, MFS fr) |                 | Transport and binding                  | 12.249 | 12.527 | 12.217 | 14.111 | 5.66E-01 | 1.73E-07 | 0.28  | 1.89  |
| <i>lpg0653</i> | major facilitator family transporter (multidrug efflux transporter, MFS fr) |                 | Transport and binding                  | 11.653 | 10.735 | 10.029 | 12.861 | 1.31E-01 | 8.99E-05 | -0.92 | 2.83  |
| <i>lpg0653</i> | major facilitator family transporter (multidrug efflux transporter, MFS fr) |                 | Transport and binding                  | 11.754 | 10.484 | 9.680  | 12.866 | 3.07E-02 | 7.40E-05 | -1.27 | 3.19  |
| <i>lpg0654</i> | DNA adenine methylase (DNA-adenine methyltransferase) <i>dam</i>            |                 | DNA/RNA degradation / restriction      | 10.665 | 9.650  | 9.233  | 10.357 | 4.09E-02 | 8.17E-02 | -1.01 | 1.12  |
| <i>lpg0654</i> | DNA adenine methylase (DNA-adenine methyltransferase) <i>dam</i>            |                 | DNA/RNA degradation / restriction      | 10.792 | 9.599  | 9.289  | 10.537 | 3.37E-02 | 5.37E-02 | -1.19 | 1.25  |
| <i>lpg0655</i> | tryptophan/tyrosine permease (tyrosine-specific transport protein)          |                 | Transport and binding                  | 11.991 | 12.217 | 10.940 | 11.866 | 3.09E-01 | 4.06E-03 | 0.23  | 0.93  |
| <i>lpg0655</i> | tryptophan/tyrosine permease (tyrosine-specific transport protein)          |                 | Transport and binding                  | 12.058 | 12.318 | 10.916 | 11.968 | 2.53E-01 | 1.54E-03 | 0.26  | 1.05  |
| <i>lpg0656</i> | tryptophan/tyrosine permease (tyrosine-specific transport protein) (arc)    |                 | Transport and binding                  | 10.754 | 9.475  | 10.039 | 10.030 | 1.18E-02 | 9.79E-01 | -1.28 | -0.01 |
| <i>lpg0656</i> | tryptophan/tyrosine permease (tyrosine-specific transport protein) (arc)    |                 | Transport and binding                  | 11.044 | 9.222  | 9.783  | 9.984  | 9.78E-04 | 7.13E-01 | -1.82 | 0.20  |
| <i>lpg0657</i> | outer membrane protein OmpA?                                                |                 | Toxin production / other pathogen func | 12.596 | 13.735 | 12.701 | 14.205 | 8.48E-05 | 1.19E-06 | 1.14  | 1.50  |
| <i>lpg0657</i> | outer membrane protein OmpA?                                                |                 | Toxin production / other pathogen func | 12.549 | 13.736 | 12.657 | 14.211 | 2.91E-05 | 8.26E-07 | 1.19  | 1.55  |
| <i>lpg0658</i> | HlyD family secretion protein                                               |                 | Protein fate / hydrolases / secretion  | 11.009 | 10.258 | 10.195 | 10.029 | 8.73E-03 | 6.16E-01 | -0.75 | -0.17 |
| <i>lpg0658</i> | HlyD family secretion protein                                               |                 | Protein fate / hydrolases / secretion  | 10.764 | 10.141 | 10.165 | 10.209 | 2.81E-01 | 8.89E-01 | -0.62 | 0.04  |
| <i>lpg0659</i> | ABC transporter EIsE (ABC transporter ATP binding protein)                  |                 | Transport and binding                  | 9.439  | 9.980  | 8.434  | 10.381 | 1.84E-01 | 8.04E-02 | 0.54  | 1.95  |
| <i>lpg0659</i> | ABC transporter EIsE (ABC transporter ATP binding protein)                  |                 | Transport and binding                  | 7.897  | 9.962  | 8.508  | 10.466 | 1.20E-01 | 7.15E-02 | 2.07  | 1.96  |
| <i>lpg0660</i> | ABC transporter permease protein                                            |                 | Transport and binding                  | 9.821  | 8.681  | 9.356  | 8.668  | 1.57E-01 | 3.71E-01 | -1.14 | -0.69 |
| <i>lpg0660</i> | ABC transporter permease protein                                            |                 | Transport and binding                  | 10.068 | 8.106  | 9.413  | 9.201  | 3.04E-02 | 7.56E-01 | -1.96 | -0.21 |
| <i>lpg0661</i> | ABC transporter permease protein                                            |                 | Transport and binding                  | 8.821  | 6.156  | 8.254  | 7.648  | 1.07E-01 | 4.37E-01 | -2.67 | -0.61 |
| <i>lpg0661</i> | ABC transporter permease protein                                            |                 | Transport and binding                  | 7.691  | 8.101  | 8.189  | 7.803  | 7.79E-01 | 5.86E-01 | 0.41  | -0.39 |
| <i>lpg0662</i> | multidrug efflux MFS outer membrane protein (RND family)                    |                 | Transport and binding                  | 9.470  | 8.954  | 9.575  | 9.060  | 5.52E-01 | 5.32E-01 | -0.52 | -0.51 |
| <i>lpg0662</i> | multidrug efflux MFS outer membrane protein (RND family)                    |                 | Transport and binding                  | 9.091  | 8.634  | 9.318  | 8.848  | 1.13E-01 | 1.28E-01 | -0.46 | -0.47 |
| <i>lpg0663</i> | soluble lytic murein transglycosylase                                       |                 | Metabolism of Complex Carbohydrate:    | 10.932 | 7.729  | 11.050 | 8.373  | 1.13E-04 | 3.15E-03 | -3.20 | -2.68 |
| <i>lpg0663</i> | soluble lytic murein transglycosylase                                       |                 | Metabolism of Complex Carbohydrate:    | 10.908 | 8.181  | 10.786 | 8.620  | 4.36E-05 | 1.83E-03 | -2.73 | -2.17 |
| <i>lpg0664</i> | D-ribulose-5-phosphate-3-epimerase                                          | <i>rpe+G736</i> | Carbohydrate Metabolism, Energy Me     | 11.080 | 10.483 | 10.887 | 11.742 | 6.81E-02 | 1.40E-03 | -0.60 | 0.86  |
| <i>lpg0664</i> | D-ribulose-5-phosphate-3-epimerase                                          | <i>rpe+G736</i> | Carbohydrate Metabolism, Energy Me     | 11.145 | 10.653 | 10.759 | 11.875 | 7.13E-03 | 2.09E-04 | -0.49 | 1.12  |
| <i>lpg0665</i> | putative transmembrane protein COG 2259                                     |                 | Unknown / hypothetical proteins        | 12.137 | 11.956 | 14.225 | 10.455 | 6.77E-01 | 8.61E-06 | -0.18 | -3.77 |
| <i>lpg0665</i> | putative transmembrane protein COG 2259                                     |                 | Unknown / hypothetical proteins        | 12.170 | 11.812 | 14.199 | 10.455 | 3.94E-01 | 7.41E-06 | -0.36 | -3.74 |
| <i>lpg0666</i> | conserved hypothetical protein                                              |                 | Unknown / hypothetical proteins        | 11.212 | 9.165  | 12.723 | 8.745  | 3.03E-03 | 3.38E-04 | -2.05 | -3.98 |
| <i>lpg0666</i> | conserved hypothetical protein                                              |                 | Unknown / hypothetical proteins        | 11.127 | 8.684  | 12.720 | 9.728  | 3.04E-03 | 3.70E-04 | -2.44 | -2.99 |
| <i>lpg0667</i> | conserved hypothetical protein                                              |                 | Unknown / hypothetical proteins        | 12.071 | 11.568 | 14.566 | 9.822  | 4.44E-01 | 1.46E-05 | -0.50 | -4.74 |
| <i>lpg0667</i> | conserved hypothetical protein                                              |                 | Unknown / hypothetical proteins        | 12.042 | 11.470 | 14.551 | 9.984  | 4.11E-01 | 8.25E-06 | -0.57 | -4.57 |
| <i>lpg0668</i> | bromodomain? protein-protein interactions? [overlaps (different frame       |                 | Named proteins of general function     | 13.733 | 14.375 | 15.315 | 12.287 | 1.45E-01 | 3.47E-05 | 0.64  | -3.03 |
| <i>lpg0668</i> | bromodomain? protein-protein interactions? [overlaps (different frame       |                 | Named proteins of general function     | 13.673 | 14.358 | 15.266 | 12.313 | 1.39E-01 | 2.26E-04 | 0.68  | -2.95 |
| <i>lpg0669</i> | hypothetical exported protein (overlaps (different frame) with previous     |                 | Named proteins of general function     | 13.171 | 13.892 | 15.101 | 11.249 | 2.37E-01 | 7.44E-04 | 0.72  | -3.85 |
| <i>lpg0669</i> | hypothetical exported protein (overlaps (different frame) with previous     |                 | Named proteins of general function     | 13.167 | 13.833 | 15.267 | 11.684 | 2.17E-01 | 2.06E-05 | 0.67  | -3.58 |
| <i>lpg0670</i> | hypothetical                                                                |                 | Unknown / hypothetical proteins        | 10.787 | 10.281 | 13.226 | 9.155  | 3.47E-01 | 9.34E-04 | -0.51 | -4.07 |
| <i>lpg0670</i> | hypothetical                                                                |                 | Unknown / hypothetical proteins        | 10.713 | 9.430  | 13.198 | 9.564  | 2.58E-01 | 4.57E-04 | -1.28 | -3.63 |
| <i>lpg0671</i> | NADH dehydrogenase transmembrane protein                                    | <i>ndh</i>      | Energy Metabolism                      | 10.526 | 9.646  | 13.747 | 8.312  | 3.49E-01 | 6.18E-04 | -0.88 | -5.43 |
| <i>lpg0671</i> | NADH dehydrogenase transmembrane protein                                    | <i>ndh</i>      | Energy Metabolism                      | 10.539 | 9.199  | 13.769 | 8.538  | 1.54E-01 | 1.20E-03 | -1.34 | -5.23 |
| <i>lpg0672</i> | acetoacetate decarboxylase (ADC)                                            |                 | Lipid Metabolism, Carbohydrate Metab   | 10.788 | 10.325 | 14.420 | 10.601 | 5.86E-01 | 4.35E-04 | -0.46 | -3.82 |
| <i>lpg0672</i> | acetoacetate decarboxylase (ADC)                                            |                 | Lipid Metabolism, Carbohydrate Metab   | 10.617 | 10.079 | 14.279 | 10.683 | 5.49E-01 | 1.99E-03 | -0.54 | -3.60 |
| <i>lpg0673</i> | signal peptide protein (integral or exported protein?)                      |                 | Named proteins of general function     | 10.098 | 9.855  | 13.263 | 9.555  | 8.18E-01 | 2.28E-02 | -0.24 | -3.71 |
| <i>lpg0673</i> | signal peptide protein (integral or exported protein?)                      |                 | Named proteins of general function     | 10.219 | 9.782  | 13.042 | 9.429  | 6.78E-01 | 5.57E-02 | -0.44 | -3.61 |
| <i>lpg0674</i> | adenylate cyclase                                                           |                 | Nucleotide Metabolism                  | 11.428 | 11.396 | 13.113 | 11.551 | 9.40E-01 | 1.03E-02 | -0.03 | -1.56 |
| <i>lpg0674</i> | adenylate cyclase                                                           |                 | Nucleotide Metabolism                  | 11.456 | 11.357 | 13.116 | 11.693 | 8.21E-01 | 1.71E-02 | -0.10 | -1.42 |
| <i>lpg0675</i> | hypothetical protein                                                        |                 | Unknown / hypothetical proteins        | 8.456  | 8.005  | 7.865  | 7.696  | 5.47E-01 | 8.25E-01 | -0.45 | -0.17 |
| <i>lpg0675</i> | hypothetical protein                                                        |                 | Unknown / hypothetical proteins        | 8.739  | 7.782  | 6.744  | 7.900  | 2.66E-01 | 5.80E-01 | -0.96 | 1.16  |
| <i>lpg0676</i> | protein product; similar to unknown protein                                 |                 | Unknown / hypothetical proteins        | 11.481 | 11.021 | 10.284 | 11.299 | 5.83E-01 | 2.25E-01 | -0.46 | 1.01  |
| <i>lpg0676</i> | protein product; similar to unknown protein                                 |                 | Unknown / hypothetical proteins        | 10.808 | 11.286 | 9.895  | 11.242 | 7.23E-02 | 7.82E-02 | 0.48  | 1.35  |
| <i>lpg0677</i> | small ORF (88aa)                                                            |                 | ORFs of unknown function (unique)      | 11.979 | 13.164 | 11.454 | 11.739 | 1.04E-02 | 3.58E-01 | 1.19  | 0.29  |
| <i>lpg0677</i> | small ORF (88aa)                                                            |                 | ORFs of unknown function (unique)      | 11.985 | 13.134 | 11.358 | 11.842 | 1.10E-02 | 1.20E-01 | 1.15  | 0.48  |
| <i>lpg0678</i> | arginine ABC transporter, periplasmic binding protein (arginine 3rd tra     |                 | Transport and binding                  | 11.840 | 10.286 | 11.833 | 9.986  | 1.28E-04 | 2.31E-05 | -1.55 | -1.85 |
| <i>lpg0678</i> | arginine ABC transporter, periplasmic binding protein (arginine 3rd tra     |                 | Transport and binding                  | 11.855 | 10.419 | 11.752 | 10.105 | 8.04E-04 | 9.21E-05 | -1.44 | -1.65 |
| <i>lpg0679</i> | adenyllyl transferase (glutamate-ammonia ligase adenyllyltransferase)       |                 | Named proteins of general function     | 10.035 | 8.865  | 8.870  | 9.338  | 3.73E-02 | 5.98E-01 | -1.17 | 0.47  |
| <i>lpg0679</i> | adenyllyl transferase (glutamate-ammonia ligase adenyllyltransferase)       |                 | Named proteins of general function     | 10.311 | 9.267  | 8.754  | 9.615  | 7.23E-04 | 2.35E-01 | -1.04 | 0.86  |
| <i>lpg0680</i> | dipeptidyl aminopeptidase/acylaminoacyl peptidase                           |                 | Protein fate / hydrolases / secretion  | 12.700 | 12.522 | 13.124 | 12.357 | 3.12E-01 | 2.23E-02 | -0.18 | -0.77 |
| <i>lpg0680</i> | dipeptidyl aminopeptidase/acylaminoacyl peptidase                           |                 | Protein fate / hydrolases / secretion  | 12.656 | 12.560 | 12.582 | 12.381 | 5.52E-01 | 2.18E-01 | -0.10 | -0.20 |



|                |                                                                         |                                                     |        |        |        |        |          |          |       |       |
|----------------|-------------------------------------------------------------------------|-----------------------------------------------------|--------|--------|--------|--------|----------|----------|-------|-------|
| <i>lpg0714</i> | sensor histidine kinase (two component sensor)                          | Signal transduction / other regulatory f            | 9.183  | 9.068  | 8.994  | 7.969  | 8.54E-01 | 3.03E-01 | -0.11 | -1.03 |
| <i>lpg0714</i> | sensor histidine kinase (two component sensor)                          | Signal transduction / other regulatory f            | 9.692  | 8.570  | 8.963  | 8.042  | 7.53E-02 | 3.25E-01 | -1.12 | -0.92 |
| <i>lpg0715</i> | two component response regulator (cobalt-zinc-cadmium resistance)       | Signal transduction / other regulatory f            | 9.066  | 7.483  | 7.333  | 6.719  | 6.51E-02 | 5.25E-01 | -1.58 | -0.61 |
| <i>lpg0715</i> | two component response regulator (cobalt-zinc-cadmium resistance)       | Signal transduction / other regulatory f            | 9.137  | 8.874  | 7.178  | 8.088  | 6.43E-01 | 3.13E-01 | -0.26 | 0.91  |
| <i>lpg0716</i> | ORF                                                                     | ORFs of unknown function (unique)                   | 10.042 | 9.777  | 9.350  | 10.515 | 5.31E-01 | 1.12E-02 | -0.26 | 1.16  |
| <i>lpg0716</i> | ORF                                                                     | ORFs of unknown function (unique)                   | 10.179 | 9.596  | 8.878  | 10.414 | 2.03E-01 | 1.41E-01 | -0.58 | 1.54  |
| <i>lpg0717</i> | small ORF (153aa)                                                       | ORFs of unknown function (unique)                   | 9.927  | 9.369  | 12.140 | 8.880  | 4.33E-01 | 3.48E-03 | -0.56 | -3.26 |
| <i>lpg0717</i> | small ORF (153aa)                                                       | ORFs of unknown function (unique)                   | 9.908  | 9.416  | 11.990 | 9.367  | 5.22E-01 | 9.39E-03 | -0.49 | -2.62 |
| <i>lpg0718</i> | proton/sodium-glutamate symport protein (sodium:dicarboxylate sym       | Transport and binding                               | 9.386  | 9.274  | 9.852  | 8.519  | 7.65E-01 | 3.93E-02 | -0.11 | -1.33 |
| <i>lpg0718</i> | proton/sodium-glutamate symport protein (sodium:dicarboxylate sym       | Transport and binding                               | 8.969  | 7.940  | 9.393  | 8.291  | 4.67E-02 | 3.20E-02 | -1.03 | -1.10 |
| <i>lpg0719</i> | valyl tRNA synthase                                                     | <i>valS</i> Amino Acid Metabolism, Translation      | 10.834 | 11.676 | 8.660  | 12.503 | 2.03E-01 | 4.40E-04 | 0.84  | 3.84  |
| <i>lpg0719</i> | valyl tRNA synthase                                                     | <i>valS</i> Amino Acid Metabolism, Translation      | 10.785 | 12.403 | 8.556  | 12.855 | 5.94E-02 | 8.12E-04 | 1.62  | 4.30  |
| <i>lpg0720</i> | multidrug resistance protein (transporter, AcrB/AcrD/AcrF family) (RN   | Transport and binding                               | 11.172 | 10.841 | 9.677  | 10.837 | 3.94E-01 | 1.27E-01 | -0.33 | 1.16  |
| <i>lpg0720</i> | multidrug resistance protein (transporter, AcrB/AcrD/AcrF family) (RN   | Transport and binding                               | 11.019 | 10.792 | 9.387  | 10.742 | 6.19E-01 | 6.06E-02 | -0.23 | 1.35  |
| <i>lpg0721</i> | RND efflux membrane fusion protein (acriflavin resistance protein E)    | Transport and binding                               | 12.353 | 12.679 | 10.969 | 12.795 | 1.08E-01 | 3.49E-04 | 0.33  | 1.83  |
| <i>lpg0721</i> | RND efflux membrane fusion protein (acriflavin resistance protein E)    | Transport and binding                               | 11.610 | 12.533 | 10.416 | 12.763 | 4.22E-03 | 1.05E-03 | 0.92  | 2.35  |
| <i>lpg0722</i> | ORF hypothetical?                                                       | Unknown / hypothetical proteins                     | 11.533 | 13.619 | 10.249 | 12.728 | 8.84E-02 | 1.02E-03 | 2.09  | 2.48  |
| <i>lpg0722</i> | ORF hypothetical?                                                       | Unknown / hypothetical proteins                     | 11.830 | 13.569 | 8.605  | 12.664 | 6.10E-02 | 4.44E-03 | 1.74  | 4.06  |
| <i>lpg0723</i> | small ORF (145aa) zinc finger protein? VrrB? His rich glycoprotein?     | Unknown / hypothetical proteins                     | 10.587 | 10.041 | 9.668  | 10.284 | 4.45E-01 | 4.01E-01 | -0.55 | 0.62  |
| <i>lpg0723</i> | small ORF (145aa) zinc finger protein? VrrB? His rich glycoprotein?     | Unknown / hypothetical proteins                     | 10.934 | 9.828  | 9.017  | 10.403 | 4.27E-02 | 1.51E-01 | -1.11 | 1.39  |
| <i>lpg0724</i> | hypothetical lipoprotein; hyperosmotically inducible periplasmic protei | Named proteins of general function                  | 13.856 | 13.803 | 12.145 | 13.781 | 8.72E-01 | 7.87E-04 | -0.05 | 1.64  |
| <i>lpg0724</i> | hypothetical lipoprotein; hyperosmotically inducible periplasmic protei | Named proteins of general function                  | 13.847 | 13.810 | 12.081 | 13.778 | 9.26E-01 | 1.05E-03 | -0.04 | 1.70  |
| <i>lpg0725</i> | serine hydroxymethyltransferase                                         | <i>glyA3</i> Amino Acid Metabolism, Metabolism o    | 12.546 | 13.462 | 11.777 | 13.508 | 2.84E-03 | 7.12E-05 | 0.92  | 1.73  |
| <i>lpg0725</i> | serine hydroxymethyltransferase                                         | <i>glyA3</i> Amino Acid Metabolism, Metabolism o    | 12.558 | 13.482 | 11.828 | 13.586 | 2.72E-03 | 8.52E-05 | 0.92  | 1.76  |
| <i>lpg0726</i> | ATP cone and Zn ribbon domains protein (transcriptional regulator), C   | Transcription factors / DNA binding prc             | 11.936 | 10.690 | 9.794  | 10.670 | 2.68E-03 | 2.05E-01 | -1.25 | 0.88  |
| <i>lpg0726</i> | ATP cone and Zn ribbon domains protein (transcriptional regulator), C   | Transcription factors / DNA binding prc             | 11.511 | 10.739 | 9.427  | 10.709 | 7.17E-02 | 1.57E-01 | -0.77 | 1.28  |
| <i>lpg0727</i> | transcription termination factor NusB (nitrogen utilization             | <i>nusB</i> Transcription factors / DNA binding prc | 11.086 | 9.833  | 9.556  | 10.876 | 6.51E-02 | 1.15E-02 | -1.25 | 1.32  |
| <i>lpg0727</i> | transcription termination factor NusB (nitrogen utilization             | <i>nusB</i> Transcription factors / DNA binding prc | 10.929 | 9.792  | 8.451  | 10.894 | 1.11E-01 | 3.44E-03 | -1.14 | 2.44  |
| <i>lpg0728</i> | thiamine monophosphate kinase (AIR synthase)                            | <i>thiL</i> Metabolism of Cofactors and Vitamins    | 10.857 | 11.487 | 10.351 | 12.380 | 2.58E-01 | 1.32E-02 | 0.63  | 2.03  |
| <i>lpg0728</i> | thiamine monophosphate kinase (AIR synthase)                            | <i>thiL</i> Metabolism of Cofactors and Vitamins    | 10.839 | 10.773 | 7.686  | 11.769 | 7.78E-01 | 6.18E-02 | -0.07 | 4.08  |
| <i>lpg0729</i> | phosphatidylglycerophosphatase A (PgpA)                                 | <i>pgpA</i> Metabolism of Complex Lipids            | 10.624 | 11.286 | 12.964 | 10.517 | 3.09E-01 | 3.11E-03 | 0.66  | -2.45 |
| <i>lpg0729</i> | phosphatidylglycerophosphatase A (PgpA)                                 | <i>pgpA</i> Metabolism of Complex Lipids            | 10.658 | 11.441 | 13.001 | 10.648 | 1.81E-01 | 3.19E-03 | 0.78  | -2.35 |
| <i>lpg0730</i> | transmembrane permease                                                  | Transport and binding                               | 9.981  | 11.948 | 10.324 | 11.203 | 1.13E-02 | 1.85E-01 | 1.97  | 0.88  |
| <i>lpg0730</i> | transmembrane permease                                                  | Transport and binding                               | 9.784  | 11.912 | 9.909  | 11.251 | 2.71E-02 | 1.89E-01 | 2.13  | 1.34  |
| <i>lpg0731</i> | hypothetical protein                                                    | Unknown / hypothetical proteins                     | 12.139 | 13.061 | 9.835  | 13.386 | 1.71E-01 | 1.90E-03 | 0.92  | 3.55  |
| <i>lpg0731</i> | hypothetical protein                                                    | Unknown / hypothetical proteins                     | 12.151 | 13.008 | 9.741  | 13.373 | 2.19E-01 | 2.98E-04 | 0.86  | 3.63  |
| <i>lpg0732</i> | hypothetical protein                                                    | Unknown / hypothetical proteins                     | 11.129 | 13.105 | 10.990 | 13.003 | 2.92E-03 | 3.80E-04 | 1.98  | 2.01  |
| <i>lpg0732</i> | hypothetical protein                                                    | Unknown / hypothetical proteins                     | 10.829 | 13.066 | 10.598 | 12.953 | 6.92E-03 | 2.57E-04 | 2.24  | 2.35  |
| <i>lpg0733</i> | ORF                                                                     | ORFs of unknown function (unique)                   | 12.338 | 12.562 | 11.845 | 11.561 | 4.03E-01 | 1.20E-02 | 0.22  | -0.28 |
| <i>lpg0733</i> | ORF                                                                     | ORFs of unknown function (unique)                   | 12.361 | 12.545 | 11.797 | 11.608 | 5.03E-01 | 2.22E-01 | 0.18  | -0.19 |
| <i>lpg0734</i> | glutamine dependent NAD+ synthetase (NH3 dependent NAD synthe           | Amino Acid Metabolism, Metabolism o                 | 9.757  | 9.605  | 9.447  | 10.210 | 6.79E-01 | 2.55E-01 | -0.15 | 0.76  |
| <i>lpg0734</i> | glutamine dependent NAD+ synthetase (NH3 dependent NAD synthe           | Amino Acid Metabolism, Metabolism o                 | 9.848  | 9.914  | 9.378  | 10.462 | 6.69E-01 | 3.10E-02 | 0.07  | 1.08  |
| <i>lpg0735</i> | DNA helicase, SNF2/RAD54 family domain protein                          | Replication and Repair                              | 9.982  | 8.988  | 10.000 | 9.637  | 6.87E-02 | 4.40E-01 | -0.99 | -0.36 |
| <i>lpg0735</i> | DNA helicase, SNF2/RAD54 family domain protein                          | Replication and Repair                              | 10.419 | 8.907  | 9.729  | 10.094 | 4.35E-04 | 4.22E-01 | -1.51 | 0.37  |
| <i>lpg0736</i> | helicase/SNF2 superfamily (superfamily II DNA/RNA helicases)            | Transcription, Replication and Repair               | 7.575  | 8.917  | 8.326  | 10.007 | 5.15E-01 | 2.69E-01 | 1.34  | 1.68  |
| <i>lpg0736</i> | helicase/SNF2 superfamily (superfamily II DNA/RNA helicases)            | Transcription, Replication and Repair               | 7.671  | 8.080  | 7.928  | 9.683  | 6.40E-01 | 3.08E-01 | 0.41  | 1.75  |
| <i>lpg0737</i> | hypothetical signal peptide protein                                     | Named proteins of general function                  | 13.932 | 14.497 | 15.198 | 13.468 | 1.00E-01 | 2.70E-03 | 0.57  | -1.73 |
| <i>lpg0737</i> | hypothetical signal peptide protein                                     | Named proteins of general function                  | 13.855 | 14.483 | 15.133 | 13.452 | 9.27E-02 | 3.38E-03 | 0.63  | -1.68 |
| <i>lpg0738</i> | replicative DNA helicase                                                | <i>dnaB</i> Replication and Repair                  | 11.345 | 11.430 | 11.181 | 11.705 | 6.10E-01 | 6.44E-02 | 0.09  | 0.52  |
| <i>lpg0738</i> | replicative DNA helicase                                                | <i>dnaB</i> Replication and Repair                  | 11.242 | 11.368 | 10.998 | 11.637 | 5.74E-01 | 8.82E-02 | 0.13  | 0.64  |
| <i>lpg0739</i> | alanine racemase                                                        | Amino Acid Metabolism, Metabolism o                 | 10.137 | 8.987  | 10.624 | 9.964  | 3.53E-01 | 6.35E-01 | -1.15 | -0.66 |
| <i>lpg0739</i> | alanine racemase                                                        | Amino Acid Metabolism, Metabolism o                 | 9.572  | 8.676  | 9.323  | 10.151 | 4.44E-01 | 4.06E-01 | -0.90 | 0.83  |
| <i>lpg0740</i> | 17kDa common antigen (17kDa surface antigen precursor <i>omp</i>        | Named proteins of general function                  | 11.008 | 13.031 | 10.966 | 10.271 | 3.43E-04 | 1.24E-01 | 2.02  | -0.70 |
| <i>lpg0740</i> | 17kDa common antigen (17kDa surface antigen precursor <i>omp</i>        | Named proteins of general function                  | 10.852 | 13.075 | 10.912 | 10.412 | 1.93E-03 | 2.82E-01 | 2.22  | -0.50 |
| <i>lpg0741</i> | inosine-5'-monophosphate dehydrogenase (IMP dehydrogenase)              | Nucleotide Metabolism                               | 10.297 | 8.538  | 11.834 | 9.283  | 1.12E-02 | 9.48E-03 | -1.76 | -2.55 |
| <i>lpg0741</i> | inosine-5'-monophosphate dehydrogenase (IMP dehydrogenase)              | Nucleotide Metabolism                               | 10.221 | 9.313  | 11.982 | 9.649  | 2.48E-02 | 3.78E-03 | -0.91 | -2.33 |
| <i>lpg0742</i> | hypothetical protein                                                    | Unknown / hypothetical proteins                     | 11.638 | 10.694 | 11.741 | 10.747 | 1.76E-01 | 1.19E-02 | -0.94 | -0.99 |
| <i>lpg0742</i> | hypothetical protein                                                    | Unknown / hypothetical proteins                     | 11.505 | 10.961 | 11.333 | 10.679 | 5.43E-01 | 2.12E-01 | -0.54 | -0.65 |
| <i>lpg0743</i> | glutamate synthetase                                                    | Energy Metabolism, Amino Acid Metab                 | 11.268 | 9.713  | 11.918 | 9.960  | 1.51E-02 | 1.19E-03 | -1.55 | -1.96 |
| <i>lpg0743</i> | glutamate synthetase                                                    | Energy Metabolism, Amino Acid Metab                 | 11.308 | 9.709  | 11.908 | 10.327 | 8.32E-03 | 5.32E-03 | -1.60 | -1.58 |
| <i>lpg0744</i> | GGDEF domain protein (regulatory components of sensory transduct        | Signal transduction / other regulatory f            | 5.933  | 8.449  | 9.401  | 5.572  |          | 8.87E-02 | 2.52  | -3.83 |
| <i>lpg0744</i> | GGDEF domain protein (regulatory components of sensory transduct        | Signal transduction / other regulatory f            | 7.934  | 10.059 | 10.010 | 6.660  | 4.95E-01 | 7.88E-02 | 2.13  | -3.35 |
| <i>lpg0745</i> | lipic acid synthetase (lipocate synthetase) COG0320                     | Named proteins of general function                  | 10.915 | 11.987 | 11.498 | 11.380 | 4.51E-04 | 6.64E-01 | 1.07  | -0.12 |
| <i>lpg0745</i> | lipic acid synthetase (lipocate synthetase) COG0320                     | Named proteins of general function                  | 10.685 | 11.852 | 11.296 | 11.424 | 5.43E-03 | 6.23E-01 | 1.17  | 0.13  |

|                |                                                                               |                                                   |        |        |        |        |          |          |       |       |
|----------------|-------------------------------------------------------------------------------|---------------------------------------------------|--------|--------|--------|--------|----------|----------|-------|-------|
| <i>lpg0746</i> | IraAB (proton/(oligo)peptide symporter)                                       | Transport and binding                             | 10.241 | 10.541 | 8.807  | 9.653  | 4.18E-01 | 9.86E-02 | 0.30  | 0.85  |
| <i>lpg0746</i> | IraAB (proton/(oligo)peptide symporter)                                       | Transport and binding                             | 10.427 | 10.561 | 8.255  | 9.719  | 6.28E-01 | 6.34E-02 | 0.13  | 1.46  |
| <i>lpg0747</i> | hypothetical                                                                  | Unknown / hypothetical proteins                   | 11.721 | 10.404 | 9.660  | 10.458 | 5.98E-02 | 2.49E-01 | -1.32 | 0.80  |
| <i>lpg0747</i> | hypothetical                                                                  | Unknown / hypothetical proteins                   | 11.374 | 11.425 | 9.976  | 11.036 | 9.42E-01 | 1.54E-02 | 0.05  | 1.06  |
| <i>lpg0748</i> | LPS biosynthesis protein (pseudaminic acid biosynthesis and flagellin         | Cell envelope synthesis, Metabolism o             | 13.943 | 14.575 | 12.752 | 14.164 | 2.33E-01 | 3.91E-03 | 0.63  | 1.41  |
| <i>lpg0748</i> | LPS biosynthesis protein (pseudaminic acid biosynthesis and flagellin         | Cell envelope synthesis, Metabolism o             | 13.922 | 14.531 | 12.743 | 14.171 | 2.06E-01 | 2.80E-03 | 0.61  | 1.43  |
| <i>lpg0749</i> | imidazole glycerol phosphate synthase, cyclase subunit I <i>hisF</i>          | Amino Acid Metabolism                             | 11.490 | 13.083 | 10.680 | 13.038 | 1.01E-02 | 1.35E-03 | 1.59  | 2.36  |
| <i>lpg0749</i> | imidazole glycerol phosphate synthase, cyclase subunit I <i>hisF</i>          | Amino Acid Metabolism                             | 10.870 | 13.225 | 10.034 | 13.257 | 2.49E-03 | 6.35E-04 | 2.36  | 3.22  |
| <i>lpg0750</i> | imidazole glycerol phosphate synthase subunit HisH (IGF <i>hisH</i> )         | Amino Acid Metabolism                             | 12.701 | 12.242 | 10.727 | 12.709 | 4.90E-01 | 1.46E-02 | -0.46 | 1.98  |
| <i>lpg0750</i> | imidazole glycerol phosphate synthase subunit HisH (IGF <i>hisH</i> )         | Amino Acid Metabolism                             | 12.822 | 12.310 | 10.607 | 12.864 | 4.13E-01 | 6.83E-03 | -0.51 | 2.26  |
| <i>lpg0751</i> | CMP-N-acetylneuraminic acid synthetase (N-acylneuram <i>neuA</i> )            | Metabolism of Complex Carbohydrate:               | 12.509 | 11.040 | 10.775 | 11.398 | 2.10E-02 | 2.05E-01 | -1.47 | 0.62  |
| <i>lpg0751</i> | CMP-N-acetylneuraminic acid synthetase (N-acylneuram <i>neuA</i> )            | Metabolism of Complex Carbohydrate:               | 11.981 | 10.125 | 10.570 | 11.448 | 5.22E-02 | 6.54E-02 | -1.86 | 0.88  |
| <i>lpg0752</i> | N-acetylneuraminic acid synthetase (N-acylneuraminic ac <i>nnab1</i> )        | Carbohydrate Metabolism, Metabolism               | 12.287 | 10.108 | 9.231  | 10.680 | 2.97E-03 | 1.42E-01 | -2.18 | 1.45  |
| <i>lpg0752</i> | N-acetylneuraminic acid synthetase (N-acylneuraminic ac <i>nnab1</i> )        | Carbohydrate Metabolism, Metabolism               | 11.806 | 9.152  | 8.561  | 10.444 | 6.29E-03 | 7.10E-02 | -2.65 | 1.88  |
| <i>lpg0753</i> | polysialic acid biosynthesis (N-acylglucosamine-2-epimerase) (UDP- $\uparrow$ | Metabolism of Complex Carbohydrate:               | 12.564 | 10.935 | 11.097 | 11.651 | 2.62E-02 | 2.70E-01 | -1.63 | 0.55  |
| <i>lpg0753</i> | polysialic acid biosynthesis (N-acylglucosamine-2-epimerase) (UDP- $\uparrow$ | Metabolism of Complex Carbohydrate:               | 12.388 | 11.339 | 10.966 | 12.316 | 3.34E-01 | 9.24E-02 | -1.05 | 1.35  |
| <i>lpg0754</i> | acetyltransferase (hexapeptide transferase) (serine-O-acetyltransfera         | Metabolism of Complex Carbohydrate:               | 14.000 | 14.926 | 12.259 | 14.655 | 6.14E-02 | 2.49E-04 | 0.93  | 2.40  |
| <i>lpg0754</i> | acetyltransferase (hexapeptide transferase) (serine-O-acetyltransfera         | Metabolism of Complex Carbohydrate:               | 14.016 | 14.961 | 12.232 | 14.669 | 4.44E-02 | 1.74E-04 | 0.95  | 2.44  |
| <i>lpg0755</i> | COG0399: Predicted pyridoxal phosphate-dependent en: <i>yvfE</i>              | Cell envelope synthesis, Signal transd            | 12.915 | 13.809 | 10.372 | 13.707 | 1.88E-01 | 1.74E-04 | 0.89  | 3.33  |
| <i>lpg0755</i> | COG0399: Predicted pyridoxal phosphate-dependent en: <i>yvfE</i>              | Cell envelope synthesis, Signal transd            | 12.777 | 13.912 | 10.304 | 13.780 | 7.75E-02 | 1.91E-04 | 1.14  | 3.48  |
| <i>lpg0756</i> | RmlC protein (dTDP-6-deoxy-D-glucose-3,5-epimerase)                           | Nucleotide Metabolism                             | 12.880 | 10.736 | 11.138 | 11.262 | 8.24E-05 | 7.47E-01 | -2.14 | 0.12  |
| <i>lpg0756</i> | RmlC protein (dTDP-6-deoxy-D-glucose-3,5-epimerase)                           | Nucleotide Metabolism                             | 12.796 | 10.883 | 11.077 | 11.304 | 5.88E-05 | 5.72E-01 | -1.91 | 0.23  |
| <i>lpg0757</i> | dTDP-6-deoxy-L-mannose dehydrogenase (dTDP-4-dehydrohannos                    | Nucleotide Metabolism                             | 10.732 | 9.426  | 10.116 | 11.233 | 4.10E-03 | 5.86E-02 | -1.31 | 1.12  |
| <i>lpg0757</i> | dTDP-6-deoxy-L-mannose dehydrogenase (dTDP-4-dehydrohannos                    | Nucleotide Metabolism                             | 10.733 | 9.413  | 9.954  | 11.162 | 1.55E-02 | 9.90E-02 | -1.32 | 1.21  |
| <i>lpg0758</i> | dTDP-glucose 4,6-dehydratase RmlB                                             | <i>rfbB</i> Nucleotide Metabolism, Biosynthesis c | 13.183 | 10.839 | 11.220 | 12.281 | 9.51E-05 | 5.00E-02 | -2.34 | 1.06  |
| <i>lpg0758</i> | dTDP-glucose 4,6-dehydratase RmlB                                             | <i>rfbB</i> Nucleotide Metabolism, Biosynthesis c | 13.258 | 10.677 | 11.165 | 12.248 | 6.31E-06 | 5.50E-02 | -2.58 | 1.08  |
| <i>lpg0759</i> | glucose-6-phosphate isomerase                                                 | <i>pgi</i> Carbohydrate Metabolism, Metabolism    | 11.691 | 11.543 | 9.901  | 12.456 | 8.65E-01 | 1.95E-04 | -0.15 | 2.56  |
| <i>lpg0759</i> | glucose-6-phosphate isomerase                                                 | <i>pgi</i> Carbohydrate Metabolism, Metabolism    | 12.064 | 11.373 | 9.396  | 12.114 | 1.15E-01 | 2.56E-03 | -0.69 | 2.72  |
| <i>lpg0760</i> | glucose-1-phosphate thymidyltransferase RmlA                                  | <i>rfbA</i> Nucleotide Metabolism, Biosynthesis c | 12.930 | 12.430 | 12.211 | 13.159 | 5.50E-02 | 6.51E-03 | -0.50 | 0.95  |
| <i>lpg0760</i> | glucose-1-phosphate thymidyltransferase RmlA                                  | <i>rfbA</i> Nucleotide Metabolism, Biosynthesis c | 12.813 | 12.363 | 12.040 | 13.171 | 1.72E-01 | 8.77E-03 | -0.45 | 1.13  |
| <i>lpg0761</i> | NAD dependent epimerase/dehydratase; UDP-glucose-4-epimerase                  | Nucleotide Metabolism, Metabolism of              | 12.318 | 9.780  | 9.999  | 10.319 | 1.28E-03 | 6.37E-01 | -2.54 | 0.32  |
| <i>lpg0761</i> | NAD dependent epimerase/dehydratase; UDP-glucose-4-epimerase                  | Nucleotide Metabolism, Metabolism of              | 12.162 | 9.733  | 9.774  | 10.458 | 5.35E-03 | 3.73E-01 | -2.43 | 0.68  |
| <i>lpg0762</i> | O-antigen initiating glycosyl transferase group 4-UDP-N-acetylmuram           | Metabolism of Complex Carbohydrate:               | 10.584 | 9.192  | 8.792  | 9.388  | 1.05E-01 | 5.99E-01 | -1.39 | 0.60  |
| <i>lpg0762</i> | O-antigen initiating glycosyl transferase group 4-UDP-N-acetylmuram           | Metabolism of Complex Carbohydrate:               | 10.771 | 8.662  | 8.205  | 8.968  | 7.80E-06 | 3.75E-01 | -2.11 | 0.76  |
| <i>lpg0763</i> | (L. pneumophila hypothetical protein)                                         | Unknown / hypothetical proteins                   | 12.076 | 11.190 | 11.551 | 10.317 | 2.06E-02 | 2.58E-02 | -0.89 | -1.23 |
| <i>lpg0763</i> | (L. pneumophila hypothetical protein)                                         | Unknown / hypothetical proteins                   | 11.452 | 10.882 | 11.278 | 10.172 | 1.90E-01 | 7.04E-02 | -0.57 | -1.11 |
| <i>lpg0764</i> | hypothetical                                                                  | Unknown / hypothetical proteins                   | 10.177 | 9.980  | 9.854  | 9.613  | 5.78E-01 | 7.11E-01 | -0.20 | -0.24 |
| <i>lpg0764</i> | hypothetical                                                                  | Unknown / hypothetical proteins                   | 10.167 | 10.259 | 9.906  | 9.857  | 7.20E-01 | 9.34E-01 | 0.09  | -0.05 |
| <i>lpg0765</i> | tetratricopeptide repeat domain 8                                             | Named proteins of general function                | 13.088 | 12.918 | 12.076 | 12.332 | 7.48E-01 | 4.24E-01 | -0.17 | 0.26  |
| <i>lpg0765</i> | tetratricopeptide repeat domain 8                                             | Named proteins of general function                | 13.111 | 12.960 | 12.098 | 12.430 | 7.80E-01 | 2.88E-01 | -0.15 | 0.33  |
| <i>lpg0766</i> | hypothetical                                                                  | Unknown / hypothetical proteins                   | 11.567 | 11.145 | 11.340 | 11.374 | 1.63E-01 | 8.72E-01 | -0.42 | 0.03  |
| <i>lpg0766</i> | hypothetical                                                                  | Unknown / hypothetical proteins                   | 11.533 | 11.297 | 10.919 | 11.576 | 5.02E-01 | 1.15E-01 | -0.24 | 0.66  |
| <i>lpg0767</i> | hypothetical                                                                  | Unknown / hypothetical proteins                   | 13.493 | 11.007 | 10.600 | 9.819  | 1.58E-03 | 3.89E-01 | -2.49 | -0.78 |
| <i>lpg0767</i> | hypothetical                                                                  | Unknown / hypothetical proteins                   | 13.543 | 10.950 | 10.710 | 10.215 | 1.25E-03 | 5.57E-01 | -2.59 | -0.50 |
| <i>lpg0768</i> | spore coat polysaccharide biosynthesis protein E (N-acetylneuramina           | Cell envelope synthesis, Chemotaxis /             | 11.284 | 10.878 | 11.353 | 11.930 | 3.09E-01 | 9.50E-02 | -0.41 | 0.58  |
| <i>lpg0768</i> | spore coat polysaccharide biosynthesis protein E (N-acetylneuramina           | Cell envelope synthesis, Chemotaxis /             | 11.285 | 10.846 | 11.310 | 11.914 | 1.17E-01 | 8.26E-02 | -0.44 | 0.60  |
| <i>lpg0769</i> | hypothetical                                                                  | Unknown / hypothetical proteins                   | 13.199 | 13.322 | 11.125 | 12.961 | 8.49E-01 | 1.16E-02 | 0.12  | 1.84  |
| <i>lpg0769</i> | hypothetical                                                                  | Unknown / hypothetical proteins                   | 13.331 | 13.396 | 10.966 | 13.029 | 8.84E-01 | 7.98E-03 | 0.07  | 2.06  |
| <i>lpg0770</i> | hypothetical                                                                  | Unknown / hypothetical proteins                   | 11.630 | 11.008 | 10.807 | 10.930 | 2.10E-01 | 6.55E-01 | -0.62 | 0.12  |
| <i>lpg0770</i> | hypothetical                                                                  | Unknown / hypothetical proteins                   | 11.803 | 11.163 | 10.610 | 11.005 | 3.75E-02 | 2.71E-01 | -0.64 | 0.40  |
| <i>lpg0771</i> | hypothetical                                                                  | Unknown / hypothetical proteins                   | 11.211 | 10.186 | 10.741 | 10.171 | 1.10E-01 | 1.30E-01 | -1.02 | -0.57 |
| <i>lpg0771</i> | hypothetical                                                                  | Unknown / hypothetical proteins                   | 11.123 | 10.214 | 10.899 | 10.401 | 2.40E-01 | 1.61E-01 | -0.91 | -0.50 |
| <i>lpg0772</i> | polysaccharide ABC transporter, permease protein <i>rfbA</i>                  | Transport and binding, Protein fate / h           | 9.997  | 10.528 | 9.543  | 10.355 | 3.81E-01 | 2.30E-01 | 0.53  | 0.81  |
| <i>lpg0772</i> | polysaccharide ABC transporter, permease protein <i>rfbA</i>                  | Transport and binding, Protein fate / h           | 9.914  | 10.504 | 9.746  | 10.569 | 3.50E-01 | 1.88E-01 | 0.59  | 0.82  |
| <i>lpg0773</i> | polysaccharide ABC transporter, ATP binding protein (O-antigen expo           | Transport and binding, Protein fate / h           | 13.512 | 11.100 | 11.559 | 11.094 | 1.62E-04 | 4.10E-01 | -2.41 | -0.46 |
| <i>lpg0773</i> | polysaccharide ABC transporter, ATP binding protein (O-antigen expo           | Transport and binding, Protein fate / h           | 13.354 | 10.704 | 11.349 | 10.930 | 3.82E-04 | 4.82E-01 | -2.65 | -0.42 |
| <i>lpg0774</i> | hypothetical (Legionella pneumophila)                                         | Unknown / hypothetical proteins                   | 11.796 | 9.561  | 10.468 | 10.141 | 2.84E-03 | 5.70E-01 | -2.24 | -0.33 |
| <i>lpg0774</i> | hypothetical (Legionella pneumophila)                                         | Unknown / hypothetical proteins                   | 12.074 | 9.328  | 10.390 | 10.214 | 1.05E-03 | 7.23E-01 | -2.75 | -0.18 |
| <i>lpg0775</i> | glycosyl transferase (L. pneumophila) COG1216                                 | Named proteins of general function                | 10.332 | 7.716  | 8.726  | 8.721  | 1.67E-01 | 9.92E-01 | -2.62 | -0.01 |
| <i>lpg0775</i> | glycosyl transferase (L. pneumophila) COG1216                                 | Named proteins of general function                | 10.448 | 8.633  | 8.504  | 9.605  | 8.90E-03 | 2.80E-02 | -1.82 | 1.10  |
| <i>lpg0776</i> | transposase (ORF1 transposase)                                                | Viral functions / Phage / Transposases            | 9.702  | 8.090  | 9.351  | 8.418  | 3.09E-01 | 3.48E-01 | -1.61 | -0.93 |
| <i>lpg0776</i> | transposase (ORF1 transposase)                                                | Viral functions / Phage / Transposases            | 9.145  | 8.451  | 8.785  | 8.281  | 4.95E-01 | 5.94E-01 | -0.69 | -0.50 |
| <i>lpg0777</i> | O-acetyltransferase (glycosyltransferase)                                     | Named proteins of general function                | 11.930 | 11.090 | 10.642 | 10.138 | 4.54E-02 | 4.60E-01 | -0.84 | -0.50 |
| <i>lpg0777</i> | O-acetyltransferase (glycosyltransferase)                                     | Named proteins of general function                | 12.227 | 11.036 | 10.386 | 10.181 | 4.26E-03 | 7.48E-01 | -1.19 | -0.20 |



|                |                                                                       |               |                                          |        |        |        |        |          |          |       |       |
|----------------|-----------------------------------------------------------------------|---------------|------------------------------------------|--------|--------|--------|--------|----------|----------|-------|-------|
| <i>lpg0778</i> | glycosyl transferase                                                  |               | Metabolism of Complex Carbohydrate:      | 11.762 | 10.182 | 11.535 | 9.951  | 1.16E-03 | 2.38E-02 | -1.58 | -1.58 |
| <i>lpg0778</i> | glycosyl transferase                                                  |               | Metabolism of Complex Carbohydrate:      | 11.734 | 10.169 | 11.462 | 10.344 | 5.76E-03 | 3.39E-02 | -1.57 | -1.12 |
| <i>lpg0779</i> | glycosyltransferase                                                   |               | Metabolism of Complex Carbohydrate:      | 11.397 | 10.912 | 8.894  | 11.843 | 1.19E-01 | 2.07E-03 | -0.48 | 2.95  |
| <i>lpg0779</i> | glycosyltransferase                                                   |               | Metabolism of Complex Carbohydrate:      | 11.194 | 10.987 | 8.288  | 11.904 | 6.32E-01 | 1.85E-03 | -0.21 | 3.62  |
| <i>lpg0780</i> | metallo-beta-lactamase family protein, COG0491: Zn dependent hydr     |               | Protein fate / hydrolases / secretion    | 13.047 | 12.464 | 10.461 | 12.830 | 3.58E-01 | 5.80E-03 | -0.58 | 2.37  |
| <i>lpg0780</i> | metallo-beta-lactamase family protein, COG0491: Zn dependent hydr     |               | Protein fate / hydrolases / secretion    | 13.193 | 12.187 | 9.742  | 12.815 | 4.78E-02 | 8.97E-03 | -1.01 | 3.07  |
| <i>lpg0781</i> | global regulator (carbon storage regulator)                           | <i>csrA-2</i> | Signal transduction / other regulatory f | 14.673 | 12.148 | 12.389 | 12.512 | 1.34E-02 | 8.48E-01 | -2.52 | 0.12  |
| <i>lpg0781</i> | global regulator (carbon storage regulator)                           | <i>csrA-2</i> | Signal transduction / other regulatory f | 14.471 | 12.137 | 12.265 | 12.421 | 1.33E-02 | 8.19E-01 | -2.33 | 0.16  |
| <i>lpg0782</i> | O-antigen acetylase (lipopolysaccharide modification acyltransferase) |               | Cell envelope synthesis, Metabolism o    | 10.308 | 8.384  | 10.038 | 8.808  | 8.38E-03 | 4.21E-02 | -1.92 | -1.23 |
| <i>lpg0782</i> | O-antigen acetylase (lipopolysaccharide modification acyltransferase) |               | Cell envelope synthesis, Metabolism o    | 10.516 | 8.358  | 9.350  | 8.842  | 6.29E-04 | 4.69E-01 | -2.16 | -0.51 |
| <i>lpg0783</i> | biotin operon repressor and biotin [acetyl CoA carboxylas             | <i>birA</i>   | Metabolism of Cofactors and Vitamins     | 11.036 | 10.319 | 10.458 | 11.011 | 2.59E-02 | 2.74E-01 | -0.72 | 0.55  |
| <i>lpg0783</i> | biotin operon repressor and biotin [acetyl CoA carboxylas             | <i>birA</i>   | Metabolism of Cofactors and Vitamins     | 10.498 | 10.426 | 9.563  | 11.098 | 9.06E-01 | 4.62E-03 | -0.07 | 1.54  |
| <i>lpg0784</i> | phosphopantetheine-protein transferase (4'-phosphopantetheinyl tran   |               | Metabolism of Cofactors and Vitamins     | 10.818 | 9.738  | 9.410  | 10.052 | 2.56E-02 | 1.54E-01 | -1.08 | 0.64  |
| <i>lpg0784</i> | phosphopantetheine-protein transferase (4'-phosphopantetheinyl tran   |               | Metabolism of Cofactors and Vitamins     | 10.776 | 9.624  | 9.205  | 10.152 | 9.63E-03 | 1.20E-01 | -1.15 | 0.95  |
| <i>lpg0785</i> | acetyl CoA carboxylase, carboxyltransferase, alpha subu               | <i>accA</i>   | Lipid Metabolism, Biosynthesis of Seci   | 11.633 | 10.810 | 10.819 | 11.234 | 5.40E-02 | 3.91E-01 | -0.83 | 0.41  |
| <i>lpg0785</i> | acetyl CoA carboxylase, carboxyltransferase, alpha subu               | <i>accA</i>   | Lipid Metabolism, Biosynthesis of Seci   | 11.247 | 10.800 | 10.658 | 11.365 | 3.96E-01 | 1.43E-01 | -0.45 | 0.71  |
| <i>lpg0786</i> | cell cycle protein MesJ                                               | <i>mesJ</i>   | Chemotaxis / motility / cell division    | 10.455 | 9.357  | 9.634  | 9.645  | 2.20E-03 | 9.84E-01 | -1.10 | 0.01  |
| <i>lpg0786</i> | cell cycle protein MesJ                                               | <i>mesJ</i>   | Chemotaxis / motility / cell division    | 10.747 | 10.392 | 9.751  | 10.495 | 7.51E-01 | 4.43E-01 | -0.35 | 0.74  |
| <i>lpg0787</i> | hypothetical protein                                                  |               | Unknown / hypothetical proteins          | 9.689  | 10.088 | 9.819  | 8.256  | 2.99E-01 | 1.94E-02 | 0.40  | -1.56 |
| <i>lpg0787</i> | hypothetical protein                                                  |               | Unknown / hypothetical proteins          | 9.359  | 9.838  | 9.491  | 8.310  | 1.29E-01 | 4.10E-02 | 0.48  | -1.18 |
| <i>lpg0788</i> | ORF                                                                   |               | ORFs of unknown function (unique)        | 11.793 | 9.732  | 9.925  | 10.572 | 4.15E-03 | 3.58E-01 | -2.06 | 0.65  |
| <i>lpg0788</i> | ORF                                                                   |               | ORFs of unknown function (unique)        | 11.914 | 9.827  | 9.156  | 10.737 | 8.07E-04 | 1.78E-01 | -2.09 | 1.58  |
| <i>lpg0789</i> | alginate O-acetyltransferase AlgI                                     |               | Named proteins of general function       | 10.625 | 8.763  | 9.652  | 8.933  | 2.08E-02 | 3.08E-01 | -1.86 | -0.72 |
| <i>lpg0789</i> | alginate O-acetyltransferase AlgI                                     |               | Named proteins of general function       | 10.596 | 8.965  | 9.793  | 9.278  | 1.47E-02 | 4.26E-01 | -1.63 | -0.51 |
| <i>lpg0790</i> | L-serine dehydratase (iron, sulfur-dependent) (L-serine d             | <i>sda-2</i>  | Amino Acid Metabolism                    | 10.626 | 12.681 | 11.723 | 13.016 | 2.86E-03 | 4.77E-04 | 2.06  | 1.29  |
| <i>lpg0790</i> | L-serine dehydratase (iron, sulfur-dependent) (L-serine d             | <i>sda-2</i>  | Amino Acid Metabolism                    | 10.494 | 12.648 | 11.460 | 12.979 | 5.35E-03 | 5.91E-04 | 2.15  | 1.52  |
| <i>lpg0791</i> | macrophage infectivity potentiator (mip)                              | <i>mip</i>    | Toxin production / other pathogen func   | 14.368 | 14.354 | 13.278 | 13.548 | 9.81E-01 | 6.10E-01 | -0.01 | 0.27  |
| <i>lpg0791</i> | macrophage infectivity potentiator (mip)                              | <i>mip</i>    | Toxin production / other pathogen func   | 14.409 | 14.349 | 13.289 | 13.600 | 9.10E-01 | 5.50E-01 | -0.06 | 0.31  |
| <i>lpg0792</i> | beta lactamase induction signal transducer AmpG                       | <i>ampG</i>   | Transcription factors / DNA binding prc  | 12.267 | 9.479  | 11.329 | 10.378 | 3.22E-05 | 3.79E-02 | -2.79 | -0.95 |
| <i>lpg0792</i> | beta lactamase induction signal transducer AmpG                       | <i>ampG</i>   | Transcription factors / DNA binding prc  | 12.303 | 9.452  | 11.485 | 10.675 | 4.57E-06 | 3.19E-02 | -2.85 | -0.81 |
| <i>lpg0793</i> | IS1400 transposase, transposase ORFA, COG2801: transposase anc        |               | Viral functions / Phage / Transposases   | 10.310 | 8.616  | 10.672 | 8.769  | 9.93E-04 | 1.25E-02 | -1.69 | -1.90 |
| <i>lpg0793</i> | IS1400 transposase, transposase ORFA, COG2801: transposase anc        |               | Viral functions / Phage / Transposases   | 9.508  | 7.541  | 9.355  | 8.108  | 1.34E-02 | 2.27E-02 | -1.97 | -1.25 |
| <i>lpg0794</i> | IS1400 transposase B                                                  |               | Viral functions / Phage / Transposases   | 8.126  | 6.569  | 9.287  | 7.839  | 9.33E-02 | 7.11E-02 | -1.56 | -1.45 |
| <i>lpg0794</i> | IS1400 transposase B                                                  |               | Viral functions / Phage / Transposases   | 8.458  | 7.688  | 9.448  | 8.012  | 2.46E-01 | 1.09E-01 | -0.77 | -1.44 |
| <i>lpg0795</i> | IS1400 transposase B                                                  |               | Viral functions / Phage / Transposases   | 7.800  | 8.073  | 7.121  | 6.453  | 8.35E-01 | 5.42E-01 | 0.27  | -0.67 |
| <i>lpg0795</i> | IS1400 transposase B                                                  |               | Viral functions / Phage / Transposases   | 6.202  | 7.924  | 6.006  | 7.394  | 1.97E-01 | 4.56E-01 | 1.72  | 1.39  |
| <i>lpg0796</i> | ORF                                                                   |               | ORFs of unknown function (unique)        | 8.630  | 9.552  | 9.439  | 9.105  | 1.33E-01 | 5.11E-01 | 0.92  | -0.33 |
| <i>lpg0796</i> | ORF                                                                   |               | ORFs of unknown function (unique)        | 9.158  | 9.596  | 9.501  | 9.285  | 4.41E-01 | 6.64E-01 | 0.44  | -0.22 |
| <i>lpg0797</i> | tRNA-Met                                                              |               | tRNA                                     | 10.857 | 8.545  | 9.953  | 9.665  | 4.53E-03 | 6.42E-01 | -2.31 | -0.29 |
| <i>lpg0797</i> | tRNA-Met                                                              |               | tRNA                                     | 10.993 | 8.889  | 9.919  | 10.194 | 2.32E-03 | 6.88E-01 | -2.10 | 0.27  |
| <i>lpg0798</i> | small ORF (128aa)                                                     |               | ORFs of unknown function (unique)        | 10.178 | 11.297 | 11.276 | 9.545  | 5.16E-03 | 3.80E-03 | 1.12  | -1.73 |
| <i>lpg0798</i> | small ORF (128aa)                                                     |               | ORFs of unknown function (unique)        | 10.264 | 11.086 | 11.211 | 10.118 | 3.21E-02 | 1.77E-01 | 0.82  | -1.09 |
| <i>lpg0799</i> | quinolinate synthetase A (NadA)                                       | <i>nadA</i>   | Metabolism of Cofactors and Vitamins     | 10.618 | 9.803  | 9.463  | 9.330  | 2.50E-02 | 8.44E-01 | -0.81 | -0.13 |
| <i>lpg0799</i> | quinolinate synthetase A (NadA)                                       | <i>nadA</i>   | Metabolism of Cofactors and Vitamins     | 10.544 | 10.122 | 10.037 | 10.242 | 4.22E-01 | 7.39E-01 | -0.42 | 0.21  |
| <i>lpg0800</i> | L-aspartate oxidase                                                   | <i>nadB1</i>  | Amino Acid Metabolism, Metabolism o      | 13.608 | 11.965 | 12.028 | 12.891 | 3.13E-02 | 1.33E-01 | -1.64 | 0.86  |
| <i>lpg0800</i> | L-aspartate oxidase                                                   | <i>nadB1</i>  | Amino Acid Metabolism, Metabolism o      | 13.558 | 12.069 | 11.912 | 12.806 | 1.04E-01 | 1.56E-01 | -1.49 | 0.89  |
| <i>lpg0801</i> | adenylsuccinate lyase                                                 |               | Nucleotide Metabolism, Amino Acid M      | 12.493 | 12.744 | 10.468 | 13.582 | 4.03E-01 | 4.38E-04 | 0.25  | 3.11  |
| <i>lpg0801</i> | adenylsuccinate lyase                                                 |               | Nucleotide Metabolism, Amino Acid M      | 12.451 | 12.795 | 10.365 | 13.598 | 2.68E-01 | 1.50E-04 | 0.34  | 3.23  |
| <i>lpg0802</i> | sulfate transporter (sulfate permease)                                |               | Transport and binding                    | 12.395 | 14.051 | 13.429 | 14.182 | 7.55E-04 | 1.25E-01 | 1.66  | 0.75  |
| <i>lpg0802</i> | sulfate transporter (sulfate permease)                                |               | Transport and binding                    | 12.383 | 14.015 | 13.373 | 14.203 | 7.04E-04 | 8.50E-02 | 1.63  | 0.83  |
| <i>lpg0803</i> | acyl CoA dehydrogenase, short chain specific                          |               | Lipid Metabolism, Metabolism of Com      | 9.430  | 9.875  | 10.182 | 8.898  | 5.71E-01 | 6.78E-02 | 0.45  | -1.28 |
| <i>lpg0803</i> | acyl CoA dehydrogenase, short chain specific                          |               | Lipid Metabolism, Metabolism of Com      | 9.456  | 10.316 | 10.102 | 9.480  | 2.93E-01 | 2.79E-01 | 0.86  | -0.62 |
| <i>lpg0804</i> | chologylglycine hydrolase (penicillin acylase)                        |               | Protein fate / hydrolases / secretion    | 9.449  | 9.021  | 10.568 | 8.307  | 5.00E-01 | 5.79E-03 | -0.43 | -2.26 |
| <i>lpg0804</i> | chologylglycine hydrolase (penicillin acylase)                        |               | Protein fate / hydrolases / secretion    | 9.336  | 8.200  | 10.485 | 8.351  | 1.99E-01 | 1.04E-02 | -1.14 | -2.13 |
| <i>lpg0805</i> | phosphoenolpyruvate synthase                                          |               | Carbohydrate Metabolism, Energy Me       | 11.830 | 11.819 | 10.847 | 12.091 | 9.88E-01 | 2.08E-02 | -0.01 | 1.24  |
| <i>lpg0805</i> | phosphoenolpyruvate synthase                                          |               | Carbohydrate Metabolism, Energy Me       | 11.844 | 11.993 | 10.710 | 12.090 | 8.29E-01 | 1.92E-02 | 0.15  | 1.38  |
| <i>lpg0806</i> | Na+/H+ antiporter                                                     |               | Transport and binding                    | 11.102 | 9.360  | 8.996  | 9.966  | 1.08E-02 | 1.08E-01 | -1.74 | 0.97  |
| <i>lpg0806</i> | Na+/H+ antiporter                                                     |               | Transport and binding                    | 10.956 | 9.954  | 9.373  | 10.540 | 9.82E-07 | 4.39E-02 | -1.00 | 1.17  |
| <i>lpg0807</i> | nicotinate-nucleotide pyrophosphorylase                               | <i>nadC</i>   | Metabolism of Cofactors and Vitamins     | 10.691 | 10.551 | 10.614 | 10.947 | 7.79E-01 | 2.70E-01 | -0.14 | 0.33  |
| <i>lpg0807</i> | nicotinate-nucleotide pyrophosphorylase                               | <i>nadC</i>   | Metabolism of Cofactors and Vitamins     | 11.300 | 10.784 | 10.120 | 10.905 | 4.36E-01 | 9.61E-02 | -0.52 | 0.78  |
| <i>lpg0808</i> | UDP-N-acetylglucosamine-N-acetylmuramyl-(pentapeptid                  | <i>murG</i>   | Metabolism of Complex Carbohydrate:      | 11.472 | 10.081 | 10.856 | 10.776 | 2.54E-04 | 8.22E-01 | -1.39 | -0.08 |
| <i>lpg0808</i> | UDP-N-acetylglucosamine-N-acetylmuramyl-(pentapeptid                  | <i>murG</i>   | Metabolism of Complex Carbohydrate:      | 11.276 | 9.896  | 10.779 | 10.779 | 9.16E-05 | 1.00E+00 | -1.38 | 0.00  |
| <i>lpg0809</i> | succinyl-diaminopimelate desuccinylase? (peptidase?) (c               | <i>dapE</i>   | Amino Acid Metabolism                    | 11.517 | 11.307 | 11.294 | 11.615 | 5.72E-01 | 1.11E-01 | -0.21 | 0.32  |
| <i>lpg0809</i> | succinyl-diaminopimelate desuccinylase? (peptidase?) (c               | <i>dapE</i>   | Amino Acid Metabolism                    | 11.443 | 11.403 | 11.159 | 11.570 | 9.10E-01 | 5.19E-02 | -0.04 | 0.41  |

|                |                                                                        |                                          |        |        |        |        |          |          |       |       |
|----------------|------------------------------------------------------------------------|------------------------------------------|--------|--------|--------|--------|----------|----------|-------|-------|
| <i>lpg0810</i> | small ORF (105aa) competence protein ComEA (DNA uptake and rel)        | Transport and binding, Transcription fa  | 12.242 | 12.495 | 10.978 | 13.660 | 4.82E-01 | 8.32E-05 | 0.25  | 2.68  |
| <i>lpg0810</i> | small ORF (105aa) competence protein ComEA (DNA uptake and rel)        | Transport and binding, Transcription fa  | 12.246 | 12.516 | 10.748 | 13.659 | 4.74E-01 | 1.45E-04 | 0.27  | 2.81  |
| <i>lpg0811</i> | rod shape determining protein MreB (regulator of FtsI) <i>mreB</i>     | Cell envelope synthesis, Signal transd   | 12.422 | 12.225 | 12.005 | 12.575 | 8.43E-01 | 3.81E-01 | -0.20 | 0.57  |
| <i>lpg0811</i> | rod shape determining protein MreB (regulator of FtsI) <i>mreB</i>     | Cell envelope synthesis, Signal transd   | 12.620 | 13.026 | 12.173 | 13.307 | 3.76E-01 | 1.29E-02 | 0.41  | 1.13  |
| <i>lpg0812</i> | rod shape determining protein MreC (cell shape determin                | Cell envelope synthesis                  | 11.153 | 9.669  | 9.562  | 11.044 | 1.28E-04 | 3.85E-03 | -1.48 | 1.48  |
| <i>lpg0812</i> | rod shape determining protein MreC (cell shape determin                | Cell envelope synthesis                  | 11.255 | 10.086 | 9.606  | 11.219 | 3.54E-03 | 1.88E-03 | -1.17 | 1.61  |
| <i>lpg0813</i> | rod shape determining protein MreD (cell shape determin                | Cell envelope synthesis                  | 10.677 | 8.939  | 9.657  | 8.358  | 3.07E-02 | 8.64E-02 | -1.74 | -1.30 |
| <i>lpg0813</i> | rod shape determining protein MreD (cell shape determin                | Cell envelope synthesis                  | 10.273 | 8.917  | 9.673  | 8.726  | 6.94E-02 | 1.37E-01 | -1.36 | -0.95 |
| <i>lpg0814</i> | pseudouridine synthase (ribosomal large subunit pseudouridine synth    | DNA/RNA degradation / restriction, Trz   | 11.298 | 11.447 | 10.281 | 11.407 | 5.65E-01 | 1.17E-02 | 0.15  | 1.13  |
| <i>lpg0814</i> | pseudouridine synthase (ribosomal large subunit pseudouridine synth    | DNA/RNA degradation / restriction, Trz   | 11.340 | 11.381 | 10.091 | 11.474 | 7.89E-01 | 2.19E-03 | 0.04  | 1.38  |
| <i>lpg0815</i> | ORF                                                                    | ORFs of unknown function (unique)        | 10.075 | 10.629 | 9.588  | 10.006 | 2.47E-01 | 2.62E-01 | 0.55  | 0.42  |
| <i>lpg0815</i> | ORF                                                                    | ORFs of unknown function (unique)        | 10.602 | 10.809 | 9.384  | 10.724 | 4.18E-01 | 5.31E-02 | 0.21  | 1.34  |
| <i>lpg0816</i> | isocitrate dehydrogenase, NADP-dependent <i>icd</i>                    | Carbohydrate Metabolism, Metabolism      | 13.562 | 13.838 | 12.832 | 14.228 | 9.94E-02 | 1.20E-04 | 0.28  | 1.40  |
| <i>lpg0816</i> | isocitrate dehydrogenase, NADP-dependent <i>icd</i>                    | Carbohydrate Metabolism, Metabolism      | 13.556 | 13.806 | 12.792 | 14.204 | 1.12E-01 | 1.08E-04 | 0.25  | 1.41  |
| <i>lpg0817</i> | conserved hypothetical protein                                         | Unknown / hypothetical proteins          | 11.556 | 12.435 | 12.724 | 12.477 | 3.86E-02 | 3.58E-01 | 0.88  | -0.25 |
| <i>lpg0817</i> | conserved hypothetical protein                                         | Unknown / hypothetical proteins          | 11.743 | 13.152 | 12.803 | 13.023 | 3.19E-02 | 7.15E-01 | 1.41  | 0.22  |
| <i>lpg0818</i> | ATP binding protease component ClpA (ATP dependent ( cl                | Protein fate / hydrolases / secretion    | 13.158 | 13.532 | 15.011 | 13.582 | 4.11E-01 | 6.74E-03 | 0.37  | -1.43 |
| <i>lpg0818</i> | ATP binding protease component ClpA (ATP dependent ( cl                | Protein fate / hydrolases / secretion    | 13.125 | 13.577 | 14.981 | 13.595 | 3.45E-01 | 8.82E-03 | 0.45  | -1.39 |
| <i>lpg0819</i> | ORF2 transposase                                                       | Viral functions / Phage / Transposases   | 10.259 | 9.806  | 10.708 | 9.869  | 3.69E-01 | 6.97E-02 | -0.45 | -0.84 |
| <i>lpg0819</i> | ORF2 transposase                                                       | Viral functions / Phage / Transposases   | 10.327 | 10.358 | 10.903 | 10.138 | 9.19E-01 | 1.24E-01 | 0.03  | -0.77 |
| <i>lpg0820</i> | hypothetical (endonuclease?)                                           | Unknown / hypothetical proteins          | 10.002 | 10.774 | 10.088 | 10.686 | 2.12E-02 | 5.81E-02 | 0.77  | 0.60  |
| <i>lpg0820</i> | hypothetical (endonuclease?)                                           | Unknown / hypothetical proteins          | 10.010 | 10.732 | 9.947  | 10.979 | 9.24E-02 | 2.74E-02 | 0.72  | 1.03  |
| <i>lpg0821</i> | lipopolysaccharide biosynthesis glycosyltransferase (beta 1,4-glucosyl | Metabolism of Complex Carbohydrate:      | 11.571 | 12.990 | 9.633  | 13.936 | 2.53E-02 | 3.70E-04 | 1.42  | 4.30  |
| <i>lpg0821</i> | lipopolysaccharide biosynthesis glycosyltransferase (beta 1,4-glucosyl | Metabolism of Complex Carbohydrate:      | 11.529 | 13.068 | 8.839  | 14.037 | 1.92E-02 | 2.34E-04 | 1.54  | 5.20  |
| <i>lpg0822</i> | O-antigen biosynthesis protein                                         | Named proteins of general function       | 10.481 | 10.394 | 10.668 | 10.668 | 8.18E-01 | 2.51E-02 | -0.09 | 0.99  |
| <i>lpg0822</i> | O-antigen biosynthesis protein                                         | Named proteins of general function       | 10.389 | 10.163 | 9.291  | 10.352 | 6.36E-01 | 3.33E-02 | -0.23 | 1.06  |
| <i>lpg0823</i> | Neurogenic locus notch protein homolog precursor                       | Named proteins of general function       | 11.828 | 10.539 | 11.663 | 9.905  | 2.79E-03 | 2.12E-04 | -1.29 | -1.76 |
| <i>lpg0823</i> | Neurogenic locus notch protein homolog precursor                       | Named proteins of general function       | 11.872 | 10.708 | 11.768 | 10.185 | 5.66E-03 | 3.34E-04 | -1.16 | -1.58 |
| <i>lpg0824</i> | rhomboid family protein (integral membrane protein)                    | Named proteins of general function       | 9.697  | 8.658  | 9.571  | 8.977  | 1.20E-01 | 3.58E-01 | -1.04 | -0.59 |
| <i>lpg0824</i> | rhomboid family protein (integral membrane protein)                    | Named proteins of general function       | 9.469  | 9.423  | 9.922  | 9.747  | 9.36E-01 | 6.97E-01 | -0.05 | -0.17 |
| <i>lpg0825</i> | peptidase, M23/M37 family                                              | Protein fate / hydrolases / secretion    | 9.966  | 10.339 | 10.767 | 10.597 | 2.11E-01 | 6.44E-01 | 0.37  | -0.17 |
| <i>lpg0825</i> | peptidase, M23/M37 family                                              | Protein fate / hydrolases / secretion    | 9.873  | 10.351 | 10.510 | 10.750 | 6.52E-02 | 5.51E-01 | 0.48  | 0.24  |
| <i>lpg0826</i> | exonuclease VII, large subunit <i>xseA</i>                             | DNA/RNA degradation / restriction        | 9.986  | 11.511 | 9.921  | 11.538 | 1.60E-02 | 1.74E-03 | 1.53  | 1.62  |
| <i>lpg0826</i> | exonuclease VII, large subunit <i>xseA</i>                             | DNA/RNA degradation / restriction        | 10.279 | 11.479 | 9.528  | 11.490 | 3.84E-03 | 1.47E-03 | 1.20  | 1.96  |
| <i>lpg0827</i> | agglutination protein, COG1538: membrane protein <i>tolC</i>           | Named proteins of general function       | 11.725 | 11.883 | 9.893  | 12.059 | 7.66E-01 | 1.25E-03 | 0.16  | 2.17  |
| <i>lpg0827</i> | agglutination protein, COG1538: membrane protein <i>tolC</i>           | Named proteins of general function       | 11.834 | 12.485 | 9.796  | 12.418 | 3.88E-01 | 9.19E-04 | 0.65  | 2.62  |
| <i>lpg0828</i> | periplasmic protein                                                    | Named proteins of general function       | 10.195 | 9.061  | 10.223 | 9.328  | 1.87E-01 | 2.70E-02 | -1.13 | -0.89 |
| <i>lpg0828</i> | periplasmic protein                                                    | Named proteins of general function       | 10.130 | 9.079  | 10.097 | 9.442  | 1.68E-01 | 1.57E-01 | -1.05 | -0.65 |
| <i>lpg0829</i> | two component histidine kinase, GGDEF domain protein/EAL domain        | Signal transduction / other regulatory f | 9.657  | 11.558 | 9.188  | 9.518  | 1.03E-07 | 6.54E-01 | 1.90  | 0.33  |
| <i>lpg0829</i> | two component histidine kinase, GGDEF domain protein/EAL domain        | Signal transduction / other regulatory f | 9.854  | 11.655 | 8.883  | 9.600  | 2.91E-07 | 2.34E-01 | 1.80  | 0.72  |
| <i>lpg0830</i> | hypothetical protein                                                   | Unknown / hypothetical proteins          | 11.804 | 11.639 | 9.991  | 11.590 | 7.62E-01 | 1.65E-02 | -0.16 | 1.60  |
| <i>lpg0830</i> | hypothetical protein                                                   | Unknown / hypothetical proteins          | 11.161 | 11.898 | 9.988  | 11.743 | 4.00E-01 | 1.15E-03 | 0.74  | 1.76  |
| <i>lpg0831</i> | flavin containing monooxygenase (dimethylaniline monooxygenase)        | Named proteins of general function       | 12.302 | 12.452 | 9.984  | 12.906 | 8.20E-01 | 1.47E-03 | 0.15  | 2.92  |
| <i>lpg0831</i> | flavin containing monooxygenase (dimethylaniline monooxygenase)        | Named proteins of general function       | 12.488 | 12.469 | 10.025 | 12.956 | 9.68E-01 | 3.51E-04 | -0.02 | 2.93  |
| <i>lpg0832</i> | oxidoreductase dehydrogenase, short chain                              | Named proteins of general function       | 10.881 | 11.577 | 10.905 | 12.004 | 1.04E-04 | 5.91E-04 | 0.70  | 1.10  |
| <i>lpg0832</i> | oxidoreductase dehydrogenase, short chain                              | Named proteins of general function       | 10.933 | 11.592 | 10.659 | 11.978 | 7.62E-04 | 1.04E-03 | 0.66  | 1.32  |
| <i>lpg0833</i> | indole-3-glycerol phosphate synthase <i>trpC</i>                       | Amino Acid Metabolism                    | 10.740 | 10.474 | 10.821 | 12.092 | 6.30E-01 | 2.57E-03 | -0.27 | 1.27  |
| <i>lpg0833</i> | indole-3-glycerol phosphate synthase <i>trpC</i>                       | Amino Acid Metabolism                    | 10.716 | 10.502 | 10.766 | 12.091 | 7.05E-01 | 8.68E-03 | -0.21 | 1.32  |
| <i>lpg0834</i> | anthranilate phosphoribosyltransferase <i>trpD</i>                     | Amino Acid Metabolism                    | 11.929 | 10.724 | 10.930 | 10.807 | 7.79E-05 | 7.04E-01 | -1.21 | -0.12 |
| <i>lpg0834</i> | anthranilate phosphoribosyltransferase <i>trpD</i>                     | Amino Acid Metabolism                    | 11.959 | 10.467 | 10.790 | 10.757 | 1.25E-03 | 9.28E-01 | -1.49 | -0.03 |
| <i>lpg0835</i> | anthranilate synthase (component II) (para-aminobenzoa <i>pabA</i>     | Amino Acid Metabolism                    | 11.480 | 10.053 | 9.875  | 11.385 | 1.35E-02 | 1.47E-02 | -1.43 | 1.51  |
| <i>lpg0835</i> | anthranilate synthase (component II) (para-aminobenzoa <i>pabA</i>     | Amino Acid Metabolism                    | 11.004 | 9.732  | 9.339  | 11.181 | 1.34E-01 | 2.94E-02 | -1.27 | 1.84  |
| <i>lpg0836</i> | ABC transporter, ATP binding protein                                   | Transport and binding                    | 11.295 | 9.774  | 10.599 | 10.413 | 1.08E-02 | 4.87E-01 | -1.52 | -0.19 |
| <i>lpg0836</i> | ABC transporter, ATP binding protein                                   | Transport and binding                    | 10.543 | 9.436  | 9.698  | 10.283 | 1.83E-01 | 2.23E-01 | -1.11 | 0.58  |
| <i>lpg0837</i> | conserved hypothetical protein                                         | Unknown / hypothetical proteins          | 10.763 | 10.037 | 10.543 | 10.435 | 2.22E-02 | 7.27E-01 | -0.73 | -0.11 |
| <i>lpg0837</i> | conserved hypothetical protein                                         | Unknown / hypothetical proteins          | 10.818 | 10.158 | 10.326 | 10.552 | 4.89E-02 | 5.38E-01 | -0.66 | 0.23  |
| <i>lpg0838</i> | conserved hypothetical protein                                         | Unknown / hypothetical proteins          | 10.872 | 10.020 | 10.427 | 10.254 | 2.39E-01 | 6.47E-01 | -0.85 | -0.17 |
| <i>lpg0838</i> | conserved hypothetical protein                                         | Unknown / hypothetical proteins          | 10.971 | 9.686  | 10.382 | 10.389 | 1.35E-01 | 9.88E-01 | -1.29 | 0.01  |
| <i>lpg0839</i> | hydrolase, HAD superfamily, subfamily III A (low specificity phosphata | Transport and binding, Protein fate / h  | 13.329 | 12.515 | 13.042 | 12.372 | 3.50E-01 | 2.99E-01 | -0.81 | -0.67 |
| <i>lpg0839</i> | hydrolase, HAD superfamily, subfamily III A (low specificity phosphata | Transport and binding, Protein fate / h  | 13.359 | 13.141 | 12.988 | 13.064 | 5.38E-01 | 7.89E-01 | -0.22 | 0.08  |
| <i>lpg0840</i> | polysialic acid capsule expression protein (carbohydrate isomerase) (  | Cell envelope synthesis, Metabolism o    | 11.208 | 12.197 | 10.640 | 12.339 | 2.71E-04 | 1.91E-04 | 0.99  | 1.70  |
| <i>lpg0840</i> | polysialic acid capsule expression protein (carbohydrate isomerase) (  | Cell envelope synthesis, Metabolism o    | 11.112 | 12.285 | 10.761 | 12.477 | 1.11E-03 | 7.65E-05 | 1.17  | 1.72  |
| <i>lpg0841</i> | toluene tolerance ABC transporter, ATP binding protein Ttg2A           | Detoxification / adaptation              | 12.451 | 11.518 | 13.622 | 11.021 | 1.12E-01 | 4.00E-03 | -0.93 | -2.60 |
| <i>lpg0841</i> | toluene tolerance ABC transporter, ATP binding protein Ttg2A           | Detoxification / adaptation              | 12.506 | 11.838 | 13.671 | 11.317 | 1.09E-01 | 6.15E-04 | -0.67 | -2.35 |

|                |                                                                                |             |                                            |        |        |        |        |          |          |       |       |
|----------------|--------------------------------------------------------------------------------|-------------|--------------------------------------------|--------|--------|--------|--------|----------|----------|-------|-------|
| <i>lpg0842</i> | toluene tolerance protein Ttg2B                                                |             | Transport and binding, Detoxification /    | 11.219 | 11.169 | 12.187 | 10.225 | 9.27E-01 | 7.80E-03 | -0.05 | -1.96 |
| <i>lpg0842</i> | toluene tolerance protein Ttg2B                                                |             | Transport and binding, Detoxification /    | 11.179 | 11.675 | 12.167 | 10.752 | 3.23E-01 | 1.23E-02 | 0.50  | -1.41 |
| <i>lpg0843</i> | toluene tolerance protein Ttg2C (mce related protein)                          |             | Detoxification / adaptation                | 12.086 | 11.562 | 13.429 | 10.437 | 7.57E-02 | 5.80E-06 | -0.52 | -2.99 |
| <i>lpg0843</i> | toluene tolerance protein Ttg2C (mce related protein)                          |             | Detoxification / adaptation                | 12.190 | 11.621 | 13.396 | 10.908 | 5.03E-02 | 6.37E-06 | -0.57 | -2.49 |
| <i>lpg0844</i> | signal peptide protein (toluene tolerance protein) Ttg2D                       |             | Detoxification / adaptation                | 12.949 | 12.286 | 13.294 | 12.035 | 4.84E-02 | 6.39E-06 | -0.66 | -1.26 |
| <i>lpg0844</i> | signal peptide protein (toluene tolerance protein) Ttg2D                       |             | Detoxification / adaptation                | 12.992 | 11.974 | 13.287 | 12.053 | 1.32E-01 | 1.32E-05 | -1.02 | -1.23 |
| <i>lpg0845</i> | small ORF (93aa) anti sigma B (or F) factor antagonist?? <i>rsbV</i>           |             | Transcription factors / DNA binding prc    | 12.010 | 10.752 | 12.372 | 10.936 | 5.63E-05 | 1.10E-04 | -1.26 | -1.44 |
| <i>lpg0845</i> | small ORF (93aa) anti sigma B (or F) factor antagonist?? <i>rsbV</i>           |             | Transcription factors / DNA binding prc    | 11.974 | 11.235 | 12.354 | 11.287 | 1.81E-01 | 1.14E-02 | -0.74 | -1.07 |
| <i>lpg0846</i> | hypothetical BolA like protein (predicted transcriptional re <i>yrbA</i> )     |             | Cell envelope synthesis, Transcription     | 12.341 | 11.618 | 13.947 | 12.863 | 2.06E-01 | 8.79E-02 | -0.72 | -1.08 |
| <i>lpg0846</i> | hypothetical BolA like protein (predicted transcriptional re <i>yrbA</i> )     |             | Cell envelope synthesis, Transcription     | 12.353 | 12.113 | 13.902 | 13.242 | 6.83E-01 | 1.67E-01 | -0.24 | -0.66 |
| <i>lpg0847</i> | UDP-N-acetylglucosamine 1-carboxyvinyltransferase (3- $\uparrow$ <i>murA</i> ) |             | Metabolism of Complex Carbohydrate:        | 12.556 | 11.904 | 14.720 | 12.704 | 2.32E-01 | 2.87E-03 | -0.65 | -2.02 |
| <i>lpg0847</i> | UDP-N-acetylglucosamine 1-carboxyvinyltransferase (3- $\uparrow$ <i>murA</i> ) |             | Metabolism of Complex Carbohydrate:        | 12.562 | 12.133 | 14.730 | 12.947 | 4.99E-01 | 2.05E-02 | -0.43 | -1.78 |
| <i>lpg0848</i> | conserved hypothetical protein TIGR00486                                       |             | Unknown / hypothetical proteins            | 10.712 | 9.474  | 12.628 | 9.898  | 3.72E-02 | 4.41E-04 | -1.24 | -2.73 |
| <i>lpg0848</i> | conserved hypothetical protein TIGR00486                                       |             | Unknown / hypothetical proteins            | 10.785 | 9.735  | 12.660 | 10.148 | 3.88E-02 | 9.17E-04 | -1.05 | -2.51 |
| <i>lpg0849</i> | ABC transporter, ATP binding protein (lipoprotein releasing system)            |             | Transport and binding                      | 9.740  | 9.776  | 9.956  | 10.303 | 9.33E-01 | 3.34E-01 | 0.04  | 0.35  |
| <i>lpg0849</i> | ABC transporter, ATP binding protein (lipoprotein releasing system)            |             | Transport and binding                      | 9.996  | 9.873  | 9.680  | 10.048 | 7.43E-01 | 5.05E-01 | -0.12 | 0.37  |
| <i>lpg0850</i> | ABC transporter, permease protein (lipoprotein releasing system)               |             | Transport and binding                      | 10.014 | 8.724  | 10.069 | 8.238  | 6.20E-02 | 1.41E-01 | -1.29 | -1.83 |
| <i>lpg0850</i> | ABC transporter, permease protein (lipoprotein releasing system)               |             | Transport and binding                      | 9.890  | 8.379  | 10.368 | 9.396  | 4.68E-02 | 3.86E-02 | -1.51 | -0.97 |
| <i>lpg0851</i> | membrane fusion protein (HlyD family secretion protein) secretion of           |             | Protein fate / hydrolases / secretion      | 12.110 | 12.825 | 11.064 | 12.780 | 2.02E-02 | 6.44E-05 | 0.71  | 1.72  |
| <i>lpg0851</i> | membrane fusion protein (HlyD family secretion protein) secretion of           |             | Protein fate / hydrolases / secretion      | 12.216 | 12.936 | 11.159 | 12.944 | 3.67E-04 | 2.46E-05 | 0.72  | 1.79  |
| <i>lpg0852</i> | ORF                                                                            |             | ORFs of unknown function (unique)          | 12.325 | 11.349 | 11.225 | 11.569 | 1.39E-01 | 3.54E-01 | -0.98 | 0.34  |
| <i>lpg0852</i> | ORF                                                                            |             | ORFs of unknown function (unique)          | 12.402 | 11.447 | 11.071 | 11.625 | 8.52E-02 | 1.60E-01 | -0.95 | 0.55  |
| <i>lpg0853</i> | transcriptional regulator FleQ (polar flagellar protein FlaK <i>fleQ</i> )     |             | Chemotaxis / motility / cell division, Tra | 11.015 | 9.264  | 10.121 | 7.312  | 5.85E-04 | 5.81E-04 | -1.75 | -2.81 |
| <i>lpg0853</i> | transcriptional regulator FleQ (polar flagellar protein FlaK <i>fleQ</i> )     |             | Chemotaxis / motility / cell division, Tra | 10.946 | 9.623  | 10.353 | 7.954  | 7.25E-03 | 2.19E-02 | -1.32 | -2.40 |
| <i>lpg0854</i> | ORF                                                                            |             | ORFs of unknown function (unique)          | 13.094 | 12.513 | 14.111 | 11.533 | 1.63E-01 | 6.64E-04 | -0.58 | -2.58 |
| <i>lpg0854</i> | ORF                                                                            |             | ORFs of unknown function (unique)          | 13.043 | 12.495 | 14.069 | 11.573 | 2.04E-01 | 1.32E-03 | -0.55 | -2.50 |
| <i>lpg0855</i> | signal peptide peptidase SppA (protease IV) (SohB protein)                     |             | Protein fate / hydrolases / secretion      | 11.032 | 10.417 | 8.651  | 11.011 | 3.64E-01 | 6.85E-03 | -0.61 | 2.36  |
| <i>lpg0855</i> | signal peptide peptidase SppA (protease IV) (SohB protein)                     |             | Protein fate / hydrolases / secretion      | 11.070 | 10.129 | 8.382  | 11.097 | 1.84E-01 | 4.81E-03 | -0.94 | 2.72  |
| <i>lpg0856</i> | heme exporter protein CcmA (ATP binding protein of heme <i>ccmA</i> )          |             | Transport and binding                      | 11.833 | 12.237 | 10.870 | 12.267 | 8.81E-02 | 2.43E-03 | 0.40  | 1.40  |
| <i>lpg0856</i> | heme exporter protein CcmA (ATP binding protein of heme <i>ccmA</i> )          |             | Transport and binding                      | 11.855 | 12.221 | 10.897 | 12.330 | 1.36E-01 | 9.14E-04 | 0.37  | 1.43  |
| <i>lpg0857</i> | heme exporter protein CcmB                                                     | <i>ccmB</i> | Transport and binding                      | 9.976  | 9.043  | 9.016  | 9.397  | 1.46E-01 | 3.10E-01 | -0.93 | 0.38  |
| <i>lpg0857</i> | heme exporter protein CcmB                                                     | <i>ccmB</i> | Transport and binding                      | 10.312 | 10.169 | 8.799  | 10.329 | 8.79E-01 | 1.78E-01 | -0.14 | 1.53  |
| <i>lpg0858</i> | heme exporter protein CcmC                                                     | <i>ccmC</i> | Transport and binding                      | 10.423 | 11.696 | 8.775  | 11.470 | 5.07E-02 | 9.71E-04 | 1.27  | 2.70  |
| <i>lpg0858</i> | heme exporter protein CcmC                                                     | <i>ccmC</i> | Transport and binding                      | 10.837 | 11.709 | 8.574  | 11.475 | 1.26E-02 | 1.17E-03 | 0.87  | 2.90  |
| <i>lpg0859</i> | cytochrome c-type biogenesis protein CcmD (heme exporter protein C)            |             | Transport and binding, Energy Metabo       | 12.683 | 13.079 | 12.006 | 13.168 | 1.33E-02 | 4.16E-04 | 0.40  | 1.16  |
| <i>lpg0859</i> | cytochrome c-type biogenesis protein CcmD (heme exporter protein C)            |             | Transport and binding, Energy Metabo       | 12.701 | 13.059 | 11.959 | 13.158 | 4.44E-02 | 1.43E-04 | 0.36  | 1.20  |
| <i>lpg0860</i> | cytochrome c-type biogenesis protein CcmE                                      | <i>ccmE</i> | Transport and binding, Energy Metabo       | 11.262 | 10.609 | 11.062 | 10.260 | 3.88E-05 | 5.90E-02 | -0.65 | -0.80 |
| <i>lpg0860</i> | cytochrome c-type biogenesis protein CcmE                                      | <i>ccmE</i> | Transport and binding, Energy Metabo       | 11.204 | 10.802 | 11.083 | 10.982 | 2.99E-01 | 7.39E-01 | -0.40 | -0.10 |
| <i>lpg0861</i> | cytochrome c-type biogenesis protein CcmF                                      | <i>ccmF</i> | Energy Metabolism                          | 10.613 | 9.352  | 7.981  | 9.963  | 2.34E-03 | 6.96E-03 | -1.26 | 1.98  |
| <i>lpg0861</i> | cytochrome c-type biogenesis protein CcmF                                      | <i>ccmF</i> | Energy Metabolism                          | 10.842 | 9.565  | 7.784  | 10.407 | 1.08E-05 | 3.39E-02 | -1.28 | 2.62  |
| <i>lpg0862</i> | cytochrome c biogenesis protein CcmG                                           | <i>dsbE</i> | Protein fate / hydrolases / secretion, E   | 11.350 | 9.505  | 11.229 | 9.889  | 2.11E-03 | 5.63E-03 | -1.84 | -1.34 |
| <i>lpg0862</i> | cytochrome c biogenesis protein CcmG                                           | <i>dsbE</i> | Protein fate / hydrolases / secretion, E   | 11.453 | 10.551 | 11.256 | 10.596 | 2.08E-01 | 3.97E-01 | -0.90 | -0.66 |
| <i>lpg0863</i> | c-type cytochrome biogenesis protein CcmH                                      |             | Energy Metabolism                          | 11.266 | 10.760 | 10.179 | 10.864 | 2.61E-01 | 1.66E-01 | -0.51 | 0.68  |
| <i>lpg0863</i> | c-type cytochrome biogenesis protein CcmH                                      |             | Energy Metabolism                          | 11.313 | 10.535 | 9.879  | 10.846 | 2.04E-02 | 1.24E-01 | -0.78 | 0.97  |
| <i>lpg0864</i> | cytochrome c type biogenesis protein CcmH                                      | <i>cycH</i> | Energy Metabolism                          | 10.615 | 14.471 | 9.453  | 13.730 | 4.87E-06 | 1.58E-06 | 3.86  | 4.28  |
| <i>lpg0864</i> | cytochrome c type biogenesis protein CcmH                                      | <i>cycH</i> | Energy Metabolism                          | 10.645 | 14.453 | 9.280  | 13.692 | 2.12E-06 | 3.56E-06 | 3.81  | 4.41  |
| <i>lpg0865</i> | outer membrane lipoprotein                                                     |             | Named proteins of general function         | 14.217 | 14.258 | 12.943 | 14.227 | 9.69E-01 | 1.62E-01 | 0.04  | 1.28  |
| <i>lpg0865</i> | outer membrane lipoprotein                                                     |             | Named proteins of general function         | 14.311 | 14.700 | 12.942 | 14.780 | 5.95E-01 | 4.13E-03 | 0.39  | 1.84  |
| <i>lpg0866</i> | 3-methyladenine DNA glycosylase                                                |             | DNA/RNA degradation / restriction          | 10.000 | 9.254  | 9.576  | 9.004  | 7.70E-02 | 3.94E-01 | -0.75 | -0.57 |
| <i>lpg0866</i> | 3-methyladenine DNA glycosylase                                                |             | DNA/RNA degradation / restriction          | 9.903  | 9.367  | 9.777  | 9.232  | 5.10E-01 | 2.42E-01 | -0.54 | -0.55 |
| <i>lpg0867</i> | ATP-dependent DNA helicase RecQ                                                | <i>recQ</i> | Replication and Repair                     | 10.990 | 10.716 | 11.561 | 11.078 | 5.98E-01 | 1.84E-01 | -0.27 | -0.48 |
| <i>lpg0867</i> | ATP-dependent DNA helicase RecQ                                                | <i>recQ</i> | Replication and Repair                     | 11.037 | 10.302 | 11.273 | 11.189 | 1.15E-01 | 8.48E-01 | -0.74 | -0.08 |
| <i>lpg0868</i> | acyl CoA dehydrogenase, short chain specific                                   |             | Lipid Metabolism, Amino Acid Metabol       | 11.591 | 11.761 | 10.406 | 11.702 | 8.60E-01 | 1.70E-01 | 0.17  | 1.30  |
| <i>lpg0868</i> | acyl CoA dehydrogenase, short chain specific                                   |             | Lipid Metabolism, Amino Acid Metabol       | 11.645 | 12.345 | 10.507 | 12.327 | 2.16E-01 | 2.37E-03 | 0.70  | 1.82  |
| <i>lpg0869</i> | 3-hydroxyisobutyryl Coenzyme A hydrolase (crotonase) (enoyl CoA h              |             | Carbohydrate Metabolism                    | 9.906  | 11.370 | 9.680  | 11.792 | 1.64E-01 | 6.18E-03 | 1.46  | 2.11  |
| <i>lpg0869</i> | 3-hydroxyisobutyryl Coenzyme A hydrolase (crotonase) (enoyl CoA h              |             | Carbohydrate Metabolism                    | 10.113 | 12.225 | 9.565  | 12.254 | 1.79E-04 | 1.18E-04 | 2.11  | 2.69  |
| <i>lpg0870</i> | 3-hydroxyisobutyryl Coenzyme A hydrolase (enoyl CoA hydratase/iso              |             | Lipid Metabolism, Amino Acid Metabol       | 12.986 | 13.256 | 12.601 | 13.009 | 2.39E-01 | 3.86E-02 | 0.27  | 0.41  |
| <i>lpg0870</i> | 3-hydroxyisobutyryl Coenzyme A hydrolase (enoyl CoA hydratase/iso              |             | Lipid Metabolism, Amino Acid Metabol       | 12.952 | 13.151 | 12.603 | 13.031 | 3.87E-01 | 9.80E-04 | 0.20  | 0.43  |
| <i>lpg0871</i> | ORF                                                                            |             | ORFs of unknown function (unique)          | 9.206  | 9.375  | 11.333 | 10.328 | 8.17E-01 | 4.82E-02 | 0.17  | -1.01 |
| <i>lpg0871</i> | ORF                                                                            |             | ORFs of unknown function (unique)          | 8.962  | 9.202  | 10.948 | 10.183 | 7.85E-01 | 1.88E-01 | 0.24  | -0.77 |
| <i>lpg0872</i> | peptide chain release factor 3                                                 | <i>prfC</i> | Translation                                | 12.743 | 11.969 | 10.939 | 12.915 | 3.82E-02 | 1.01E-03 | -0.77 | 1.98  |
| <i>lpg0872</i> | peptide chain release factor 3                                                 | <i>prfC</i> | Translation                                | 12.849 | 12.008 | 10.884 | 12.939 | 9.53E-03 | 1.57E-03 | -0.84 | 2.06  |
| <i>lpg0873</i> | small ORF (141aa) (60 kDa chaperonin features?)                                |             | Protein fate / hydrolases / secretion      | 14.002 | 13.218 | 13.749 | 13.930 | 3.48E-01 | 7.85E-01 | -0.78 | 0.18  |
| <i>lpg0873</i> | small ORF (141aa) (60 kDa chaperonin features?)                                |             | Protein fate / hydrolases / secretion      | 13.893 | 13.869 | 13.823 | 14.480 | 8.28E-01 | 6.17E-03 | -0.02 | 0.66  |

|                |                                                                       |               |                                          |        |        |        |        |          |          |       |       |
|----------------|-----------------------------------------------------------------------|---------------|------------------------------------------|--------|--------|--------|--------|----------|----------|-------|-------|
| <i>lpg0874</i> | NAD(P) transhydrogenase (beta subunit)                                | <i>pntB</i>   | Metabolism of Cofactors and Vitamins     | 10.252 | 10.262 | 10.478 | 8.339  | 9.72E-01 | 1.63E-03 | 0.01  | -2.14 |
| <i>lpg0874</i> | NAD(P) transhydrogenase (beta subunit)                                | <i>pntB</i>   | Metabolism of Cofactors and Vitamins     | 10.045 | 10.202 | 10.442 | 8.876  | 6.06E-01 | 1.29E-03 | 0.16  | -1.57 |
| <i>lpg0875</i> | transmembrane NAD(P) transhydrogenase (alpha subunit)                 | <i>pntAb2</i> | Metabolism of Cofactors and Vitamins     | 11.351 | 11.020 | 11.864 | 8.944  | 3.31E-01 | 6.85E-06 | -0.33 | -2.92 |
| <i>lpg0875</i> | transmembrane NAD(P) transhydrogenase (alpha subunit)                 | <i>pntAb2</i> | Metabolism of Cofactors and Vitamins     | 11.308 | 11.259 | 11.818 | 9.454  | 8.24E-01 | 1.03E-05 | -0.05 | -2.36 |
| <i>lpg0876</i> | alanine dehydrogenase and pyridine nucleotide transhyd                | <i>pntAa</i>  | Metabolism of Cofactors and Vitamins     | 10.872 | 11.757 | 11.306 | 9.586  | 8.94E-06 | 6.16E-04 | 0.89  | -1.72 |
| <i>lpg0876</i> | alanine dehydrogenase and pyridine nucleotide transhyd                | <i>pntAa</i>  | Metabolism of Cofactors and Vitamins     | 10.861 | 11.728 | 11.490 | 10.836 | 7.39E-04 | 7.17E-02 | 0.87  | -0.65 |
| <i>lpg0877</i> | hypothetical transporter                                              |               | Named proteins of general function       | 11.925 | 14.916 | 12.035 | 13.955 | 2.58E-06 | 4.88E-05 | 2.99  | 1.92  |
| <i>lpg0877</i> | hypothetical transporter                                              |               | Named proteins of general function       | 11.975 | 14.969 | 12.090 | 14.179 | 3.56E-06 | 5.01E-06 | 2.99  | 2.09  |
| <i>lpg0878</i> | small ORF (99aa)                                                      |               | ORFs of unknown function (unique)        | 10.622 | 9.198  | 13.988 | 8.507  | 1.22E-01 | 1.06E-04 | -1.42 | -5.48 |
| <i>lpg0878</i> | small ORF (99aa)                                                      |               | ORFs of unknown function (unique)        | 10.555 | 9.639  | 13.944 | 8.538  | 2.20E-01 | 3.63E-04 | -0.92 | -5.41 |
| <i>lpg0879</i> | two component response regulator with GGDEF domain (regulatory c      |               | Signal transduction / other regulatory f | 9.690  | 9.415  | 11.478 | 9.438  | 7.10E-01 | 1.41E-02 | -0.27 | -2.04 |
| <i>lpg0879</i> | two component response regulator with GGDEF domain (regulatory c      |               | Signal transduction / other regulatory f | 10.008 | 10.475 | 11.812 | 10.143 | 4.41E-01 | 2.63E-02 | 0.47  | -1.67 |
| <i>lpg0880</i> | ORF                                                                   |               | ORFs of unknown function (unique)        | 12.144 | 12.176 | 9.711  | 11.847 | 9.59E-01 | 7.58E-03 | 0.03  | 2.14  |
| <i>lpg0880</i> | ORF                                                                   |               | ORFs of unknown function (unique)        | 11.877 | 12.161 | 9.403  | 11.686 | 7.55E-01 | 7.46E-03 | 0.28  | 2.28  |
| <i>lpg0881</i> | tRNA-Ser                                                              |               | tRNA                                     | 10.836 | 11.697 | 11.397 | 11.401 | 3.19E-01 | 9.97E-01 | 0.86  | 0.00  |
| <i>lpg0881</i> | tRNA-Ser                                                              |               | tRNA                                     | 11.261 | 10.861 | 11.074 | 11.249 | 5.24E-01 | 8.53E-01 | -0.40 | 0.18  |
| <i>lpg0882</i> | small ORF (144aa)                                                     |               | ORFs of unknown function (unique)        | 11.962 | 12.356 | 12.553 | 12.281 | 2.19E-01 | 4.78E-01 | 0.39  | -0.27 |
| <i>lpg0882</i> | small ORF (144aa)                                                     |               | ORFs of unknown function (unique)        | 11.950 | 12.330 | 12.534 | 12.411 | 2.44E-01 | 7.29E-01 | 0.38  | -0.12 |
| <i>lpg0883</i> | small ORF (148aa)                                                     |               | ORFs of unknown function (unique)        | 11.562 | 12.245 | 12.068 | 12.014 | 1.12E-01 | 8.69E-01 | 0.68  | -0.05 |
| <i>lpg0883</i> | small ORF (148aa)                                                     |               | ORFs of unknown function (unique)        | 11.569 | 12.176 | 12.023 | 12.018 | 1.66E-01 | 9.88E-01 | 0.61  | -0.01 |
| <i>lpg0884</i> | ORF hypothetical?                                                     |               | Unknown / hypothetical proteins          | 7.276  | 7.693  | 6.988  | 4.766  | 6.24E-01 | 1.66E-01 | 0.42  | -2.22 |
| <i>lpg0884</i> | ORF hypothetical?                                                     |               | Unknown / hypothetical proteins          | 7.577  | 5.569  | 8.308  | 7.526  | 1.55E-01 | 4.95E-01 | -2.01 | -0.78 |
| <i>lpg0885</i> | glycosyl hydrolase (beta-hexosaminidase A) (beta-N-acetylglucosami    |               | Metabolism of Complex Carbohydrate:      | 12.893 | 11.711 | 12.028 | 12.455 | 5.47E-03 | 4.67E-01 | -1.18 | 0.43  |
| <i>lpg0885</i> | glycosyl hydrolase (beta-hexosaminidase A) (beta-N-acetylglucosami    |               | Metabolism of Complex Carbohydrate:      | 12.911 | 11.330 | 12.041 | 12.551 | 9.32E-03 | 3.32E-01 | -1.58 | 0.51  |
| <i>lpg0886</i> | sodium:dicarboxylate symporter (neutral amino acid (glutamate) trans  |               | Transport and binding                    | 11.201 | 10.741 | 10.662 | 10.314 | 1.51E-02 | 1.74E-01 | -0.46 | -0.35 |
| <i>lpg0886</i> | sodium:dicarboxylate symporter (neutral amino acid (glutamate) trans  |               | Transport and binding                    | 11.281 | 10.789 | 10.572 | 10.377 | 2.32E-02 | 5.22E-01 | -0.49 | -0.19 |
| <i>lpg0887</i> | N-succinyl-diaminopimelate desuccinylase                              | <i>dapE</i>   | Amino Acid Metabolism                    | 14.037 | 15.496 | 14.673 | 15.670 | 1.09E-05 | 4.09E-03 | 1.46  | 1.00  |
| <i>lpg0887</i> | N-succinyl-diaminopimelate desuccinylase                              | <i>dapE</i>   | Amino Acid Metabolism                    | 14.082 | 15.529 | 14.671 | 15.804 | 2.11E-05 | 1.64E-03 | 1.45  | 1.13  |
| <i>lpg0888</i> | 2,3,4,5-tetrahydropyridine-2-carboxylate N-succinyltransf             | <i>dapD</i>   | Amino Acid Metabolism                    | 11.938 | 11.724 | 10.807 | 12.571 | 5.82E-01 | 5.27E-05 | -0.21 | 1.76  |
| <i>lpg0888</i> | 2,3,4,5-tetrahydropyridine-2-carboxylate N-succinyltransf             | <i>dapD</i>   | Amino Acid Metabolism                    | 11.959 | 11.395 | 10.583 | 12.438 | 2.21E-01 | 3.48E-04 | -0.56 | 1.85  |
| <i>lpg0889</i> | acyltransferase (endonuclease?)                                       |               | Named proteins of general function       | 11.354 | 11.555 | 10.557 | 11.997 | 3.68E-01 | 4.93E-03 | 0.20  | 1.44  |
| <i>lpg0889</i> | acyltransferase (endonuclease?)                                       |               | Named proteins of general function       | 11.308 | 11.605 | 10.177 | 12.078 | 1.92E-01 | 1.45E-02 | 0.30  | 1.90  |
| <i>lpg0890</i> | cystathionine beta-lyase (cystathionine gamma lyase)                  | <i>metC</i>   | Amino Acid Metabolism, Metabolism o      | 11.027 | 12.181 | 10.992 | 12.353 | 4.52E-02 | 1.83E-05 | 1.15  | 1.36  |
| <i>lpg0890</i> | cystathionine beta-lyase (cystathionine gamma lyase)                  | <i>metC</i>   | Amino Acid Metabolism, Metabolism o      | 11.200 | 12.119 | 10.841 | 12.366 | 3.32E-02 | 2.07E-06 | 0.92  | 1.52  |
| <i>lpg0891</i> | sensory box protein/GGDEF/EAL domains                                 |               | Signal transduction / other regulatory f | 6.816  | 9.234  | 8.153  | 10.368 | 2.81E-03 | 1.65E-02 | 2.42  | 2.22  |
| <i>lpg0891</i> | sensory box protein/GGDEF/EAL domains                                 |               | Signal transduction / other regulatory f | 5.366  | 9.263  | 7.613  | 10.055 | 2.06E-04 | 3.75E-02 | 3.90  | 2.44  |
| <i>lpg0892</i> | kynurenine 3-monooxygenase (kynurenine 3-hydroxylase)                 |               | Amino Acid Metabolism                    | 11.131 | 10.674 | 12.830 | 9.813  | 4.51E-01 | 1.55E-04 | -0.46 | -3.02 |
| <i>lpg0892</i> | kynurenine 3-monooxygenase (kynurenine 3-hydroxylase)                 |               | Amino Acid Metabolism                    | 11.107 | 10.830 | 12.777 | 9.955  | 5.88E-01 | 3.69E-04 | -0.28 | -2.82 |
| <i>lpg0893</i> | hypothetical                                                          |               | Unknown / hypothetical proteins          | 12.851 | 10.107 | 13.893 | 9.039  | 3.36E-04 | 5.84E-05 | -2.74 | -4.85 |
| <i>lpg0893</i> | hypothetical                                                          |               | Unknown / hypothetical proteins          | 12.857 | 10.341 | 13.911 | 9.895  | 3.95E-05 | 1.60E-06 | -2.52 | -4.02 |
| <i>lpg0894</i> | cytokinin oxidase (cytokinin dehydrogenase)                           |               | Named proteins of general function       | 9.885  | 8.985  | 10.396 | 8.922  | 1.82E-01 | 1.43E-01 | -0.90 | -1.47 |
| <i>lpg0894</i> | cytokinin oxidase (cytokinin dehydrogenase)                           |               | Named proteins of general function       | 9.645  | 9.703  | 10.123 | 9.783  | 9.38E-01 | 7.33E-01 | 0.06  | -0.34 |
| <i>lpg0895</i> | ORF                                                                   |               | ORFs of unknown function (unique)        | 10.424 | 10.091 | 10.146 | 9.963  | 2.73E-01 | 6.08E-01 | -0.33 | -0.18 |
| <i>lpg0895</i> | ORF                                                                   |               | ORFs of unknown function (unique)        | 10.144 | 9.929  | 9.485  | 9.614  | 6.44E-01 | 8.12E-01 | -0.21 | 0.13  |
| <i>lpg0896</i> | lipoprotein (enhanced entry protein EnhC?) COG0790                    |               | Named proteins of general function       | 10.286 | 12.390 | 9.820  | 12.258 | 1.09E-04 | 2.28E-05 | 2.10  | 2.44  |
| <i>lpg0896</i> | lipoprotein (enhanced entry protein EnhC?) COG0790                    |               | Named proteins of general function       | 10.457 | 12.307 | 9.698  | 12.240 | 2.13E-05 | 1.06E-06 | 1.85  | 2.54  |
| <i>lpg0897</i> | Na/Ca antiporter (sodium/calcium exchange protein)                    |               | Transport and binding                    | 9.960  | 10.045 | 10.459 | 9.653  | 8.75E-01 | 1.65E-01 | 0.09  | -0.81 |
| <i>lpg0897</i> | Na/Ca antiporter (sodium/calcium exchange protein)                    |               | Transport and binding                    | 10.036 | 10.371 | 9.962  | 10.172 | 5.68E-01 | 7.42E-01 | 0.33  | 0.21  |
| <i>lpg0898</i> | hypothetical                                                          | <i>ceg18</i>  | Unknown / hypothetical proteins          | 14.437 | 14.235 | 14.084 | 13.685 | 7.29E-01 | 5.77E-01 | -0.20 | -0.40 |
| <i>lpg0898</i> | hypothetical                                                          | <i>ceg18</i>  | Unknown / hypothetical proteins          | 14.573 | 14.523 | 14.076 | 14.220 | 9.13E-01 | 5.95E-01 | -0.05 | 0.14  |
| <i>lpg0899</i> | A/G specific adenine glycosylase                                      |               | DNA/RNA degradation / restriction        | 9.713  | 8.636  | 9.835  | 7.714  | 7.52E-03 | 1.07E-02 | -1.08 | -2.12 |
| <i>lpg0899</i> | A/G specific adenine glycosylase                                      |               | DNA/RNA degradation / restriction        | 9.430  | 8.238  | 9.015  | 7.877  | 3.65E-03 | 6.22E-02 | -1.19 | -1.14 |
| <i>lpg0900</i> | hypothetical (AsmA?) (outer membrane assembly protein) LPS bioge      |               | Unknown / hypothetical proteins          | 11.807 | 10.680 | 9.372  | 10.929 | 1.90E-01 | 3.59E-02 | -1.13 | 1.56  |
| <i>lpg0900</i> | hypothetical (AsmA?) (outer membrane assembly protein) LPS bioge      |               | Unknown / hypothetical proteins          | 11.673 | 10.436 | 8.782  | 11.493 | 1.05E-01 | 7.10E-03 | -1.24 | 2.71  |
| <i>lpg0901</i> | hypothetical protein NMA0899                                          |               | Named proteins of general function       | 10.757 | 8.884  | 8.738  | 8.738  | 5.29E-02 | 1.19E-03 | -1.87 | -4.72 |
| <i>lpg0901</i> | hypothetical protein NMA0899                                          |               | Named proteins of general function       | 10.929 | 10.624 | 13.572 | 9.429  | 6.93E-01 | 1.29E-03 | -0.30 | -4.14 |
| <i>lpg0902</i> | ORF                                                                   |               | ORFs of unknown function (unique)        | 10.347 | 10.515 | 13.955 | 9.245  | 8.51E-01 | 7.92E-04 | 0.17  | -4.71 |
| <i>lpg0902</i> | ORF                                                                   |               | ORFs of unknown function (unique)        | 10.265 | 10.520 | 13.906 | 9.279  | 7.80E-01 | 2.08E-03 | 0.26  | -4.63 |
| <i>lpg0903</i> | DegP protease (Do-like, S2-serine-like) (periplasmic serine protease  |               | Protein fate / hydrolases / secretion    | 12.133 | 12.771 | 12.684 | 11.785 | 5.06E-01 | 1.67E-01 | 0.64  | -0.90 |
| <i>lpg0903</i> | DegP protease (Do-like, S2-serine-like) (periplasmic serine protease  |               | Protein fate / hydrolases / secretion    | 12.100 | 13.212 | 12.697 | 12.240 | 3.16E-02 | 5.71E-02 | 1.11  | -0.46 |
| <i>lpg0904</i> | hydrolase, isochorismatase family                                     |               | Metabolism of Cofactors and Vitamins     | 11.554 | 10.915 | 11.658 | 10.548 | 2.06E-02 | 2.40E-03 | -0.64 | -1.11 |
| <i>lpg0904</i> | hydrolase, isochorismatase family                                     |               | Metabolism of Cofactors and Vitamins     | 11.435 | 10.901 | 11.457 | 10.542 | 9.16E-02 | 2.52E-02 | -0.53 | -0.92 |
| <i>lpg0905</i> | 3-oxoacyl (acyl carrier protein) reductase (short chain dehydrogenase |               | Lipid Metabolism, Amino Acid Metabol     | 12.731 | 12.542 | 12.068 | 12.210 | 5.85E-01 | 4.32E-01 | -0.19 | 0.14  |
| <i>lpg0905</i> | 3-oxoacyl (acyl carrier protein) reductase (short chain dehydrogenase |               | Lipid Metabolism, Amino Acid Metabol     | 12.698 | 12.795 | 12.014 | 12.377 | 6.29E-01 | 2.05E-02 | 0.10  | 0.36  |

|                |                                                                             |               |                                            |        |        |        |        |          |          |       |       |
|----------------|-----------------------------------------------------------------------------|---------------|--------------------------------------------|--------|--------|--------|--------|----------|----------|-------|-------|
| <i>lpg0906</i> | hypothetical?                                                               |               | Chemotaxis / motility / cell division      | 10.164 | 10.034 | 12.176 | 9.299  | 7.78E-01 | 3.13E-04 | -0.13 | -2.88 |
| <i>lpg0906</i> | hypothetical?                                                               |               | Chemotaxis / motility / cell division      | 10.156 | 9.488  | 12.152 | 9.348  | 2.36E-01 | 9.91E-04 | -0.67 | -2.80 |
| <i>lpg0907</i> | negative regulator of flagellin synthesis (anti sigma factor 28 FlgM)       |               | Chemotaxis / motility / cell division, Sig | 9.487  | 11.673 | 11.830 | 10.536 | 1.14E-02 | 1.75E-01 | 2.19  | -1.29 |
| <i>lpg0907</i> | negative regulator of flagellin synthesis (anti sigma factor 28 FlgM)       |               | Chemotaxis / motility / cell division, Sig | 9.385  | 11.624 | 11.673 | 10.634 | 9.57E-03 | 3.24E-01 | 2.24  | -1.04 |
| <i>lpg0908</i> | flagella basal body P-ring formation protein FlgA                           |               | Chemotaxis / motility / cell division      | 10.687 | 10.207 | 11.910 | 9.497  | 1.58E-01 | 8.70E-04 | -0.48 | -2.41 |
| <i>lpg0908</i> | flagella basal body P-ring formation protein FlgA                           |               | Chemotaxis / motility / cell division      | 10.603 | 10.497 | 11.674 | 9.434  | 8.59E-01 | 1.34E-02 | -0.11 | -2.24 |
| <i>lpg0909</i> | cytochrome c5                                                               |               | Named proteins of general function         | 10.362 | 10.318 | 10.513 | 11.209 | 9.16E-01 | 2.79E-02 | -0.04 | 0.70  |
| <i>lpg0909</i> | cytochrome c5                                                               |               | Named proteins of general function         | 10.434 | 10.232 | 10.310 | 11.094 | 6.48E-01 | 1.22E-01 | -0.20 | 0.78  |
| <i>lpg0910</i> | enhanced entry protein EnhA                                                 | <i>enhA</i>   | Toxin production / other pathogen func     | 11.015 | 9.940  | 14.640 | 11.002 | 2.97E-01 | 6.60E-03 | -1.07 | -3.64 |
| <i>lpg0910</i> | enhanced entry protein EnhA                                                 | <i>enhA</i>   | Toxin production / other pathogen func     | 11.015 | 9.930  | 14.277 | 10.665 | 3.43E-01 | 1.40E-02 | -1.08 | -3.61 |
| <i>lpg0911</i> | Bvg accessory factor (transcriptional regulatory protein) (32 kDa repli     |               | Transcription factors / DNA binding prc    | 10.760 | 11.260 | 10.662 | 11.562 | 2.11E-01 | 1.58E-02 | 0.50  | 0.90  |
| <i>lpg0911</i> | Bvg accessory factor (transcriptional regulatory protein) (32 kDa repli     |               | Transcription factors / DNA binding prc    | 10.740 | 11.334 | 10.620 | 11.888 | 6.26E-02 | 6.06E-04 | 0.59  | 1.27  |
| <i>lpg0912</i> | small ORF (35aa)                                                            |               | ORFs of unknown function (unique)          | 10.716 | 10.368 | 9.898  | 10.711 | 4.31E-01 | 2.20E-01 | -0.35 | 0.81  |
| <i>lpg0912</i> | small ORF (35aa)                                                            |               | ORFs of unknown function (unique)          | 10.606 | 10.198 | 9.825  | 10.760 | 3.41E-01 | 1.43E-01 | -0.41 | 0.94  |
| <i>lpg0913</i> | MraZ protein                                                                |               | Named proteins of general function         | 12.420 | 12.803 | 11.715 | 13.319 | 2.40E-01 | 6.43E-05 | 0.38  | 1.60  |
| <i>lpg0913</i> | MraZ protein                                                                |               | Named proteins of general function         | 12.419 | 12.764 | 11.697 | 13.330 | 2.98E-01 | 3.38E-05 | 0.34  | 1.63  |
| <i>lpg0914</i> | S-adenosylmethyl transferase MraW                                           | <i>mraW</i>   | Chemotaxis / motility / cell division      | 12.196 | 12.146 | 12.611 | 12.149 | 7.82E-01 | 5.59E-02 | -0.05 | -0.46 |
| <i>lpg0914</i> | S-adenosylmethyl transferase MraW                                           | <i>mraW</i>   | Chemotaxis / motility / cell division      | 12.229 | 12.215 | 12.606 | 12.361 | 9.40E-01 | 2.74E-01 | -0.01 | -0.25 |
| <i>lpg0915</i> | cell division transmembrane protein FtsL                                    |               | Chemotaxis / motility / cell division      | 12.032 | 11.875 | 12.808 | 10.916 | 4.36E-01 | 2.28E-05 | -0.16 | -1.89 |
| <i>lpg0915</i> | cell division transmembrane protein FtsL                                    |               | Chemotaxis / motility / cell division      | 11.909 | 11.798 | 12.747 | 10.924 | 7.04E-01 | 1.96E-05 | -0.11 | -1.82 |
| <i>lpg0916</i> | penicillin binding protein 3 (transpeptidase) (cell division)   <i>pbpB</i> |               | Cell envelope synthesis, Metabolism o      | 10.236 | 9.303  | 8.543  | 9.954  | 9.00E-02 | 5.05E-02 | -0.93 | 1.41  |
| <i>lpg0916</i> | penicillin binding protein 3 (transpeptidase) (cell division)   <i>pbpB</i> |               | Cell envelope synthesis, Metabolism o      | 10.405 | 9.868  | 8.419  | 10.088 | 1.74E-01 | 3.76E-02 | -0.54 | 1.67  |
| <i>lpg0917</i> | UDP-N-acetylmuramyl-tripeptide synthetase MurE (mesc <i>murE</i>            |               | Amino Acid Metabolism, Metabolism o        | 10.635 | 10.890 | 11.256 | 11.442 | 5.60E-01 | 5.15E-01 | 0.25  | 0.19  |
| <i>lpg0917</i> | UDP-N-acetylmuramyl-tripeptide synthetase MurE (mesc <i>murE</i>            |               | Amino Acid Metabolism, Metabolism o        | 10.544 | 10.825 | 11.308 | 11.526 | 5.57E-01 | 4.84E-01 | 0.28  | 0.22  |
| <i>lpg0918</i> | erythronate-4-phosphate dehydrogenase                                       |               | Metabolism of Cofactors and Vitamins       | 11.529 | 10.494 | 10.156 | 11.129 | 1.09E-03 | 1.26E-02 | -1.04 | 0.97  |
| <i>lpg0918</i> | erythronate-4-phosphate dehydrogenase                                       |               | Metabolism of Cofactors and Vitamins       | 11.535 | 10.714 | 10.131 | 11.172 | 6.89E-04 | 4.70E-02 | -0.82 | 1.04  |
| <i>lpg0919</i> | transmembrane protein (Zn dependent protease) (membrane metallo             |               | Protein fate / hydrolases / secretion      | 10.283 | 9.799  | 9.479  | 9.835  | 3.84E-01 | 6.65E-01 | -0.48 | 0.36  |
| <i>lpg0919</i> | transmembrane protein (Zn dependent protease) (membrane metallo             |               | Protein fate / hydrolases / secretion      | 10.026 | 10.001 | 8.928  | 10.114 | 9.57E-01 | 2.71E-01 | -0.02 | 1.19  |
| <i>lpg0920</i> | phosphatidylglycerophosphatase B (Pap2)                                     |               | Metabolism of Complex Lipids               | 12.045 | 12.072 | 10.027 | 11.804 | 9.48E-01 | 1.37E-03 | 0.03  | 1.78  |
| <i>lpg0920</i> | phosphatidylglycerophosphatase B (Pap2)                                     |               | Metabolism of Complex Lipids               | 11.908 | 12.059 | 9.789  | 11.713 | 7.63E-01 | 6.89E-03 | 0.15  | 1.92  |
| <i>lpg0921</i> | ORF                                                                         |               | ORFs of unknown function (unique)          | 11.842 | 10.569 | 10.173 | 9.374  | 1.62E-02 | 1.06E-01 | -1.27 | -0.80 |
| <i>lpg0921</i> | ORF                                                                         |               | ORFs of unknown function (unique)          | 11.865 | 10.392 | 10.003 | 9.485  | 8.56E-03 | 3.14E-01 | -1.47 | -0.52 |
| <i>lpg0922</i> | electron transfer flavoprotein, beta subunit                                | <i>etfB</i>   | Energy Metabolism                          | 13.322 | 12.546 | 11.421 | 13.654 | 1.67E-01 | 1.81E-03 | -0.78 | 2.23  |
| <i>lpg0922</i> | electron transfer flavoprotein, beta subunit                                | <i>etfB</i>   | Energy Metabolism                          | 12.957 | 12.647 | 11.055 | 13.716 | 7.55E-01 | 1.67E-03 | -0.31 | 2.66  |
| <i>lpg0923</i> | electron transfer flavoprotein, alpha subunit                               | <i>etfA-2</i> | Energy Metabolism                          | 12.304 | 11.652 | 10.581 | 12.494 | 2.55E-01 | 9.98E-03 | -0.65 | 1.91  |
| <i>lpg0923</i> | electron transfer flavoprotein, alpha subunit                               | <i>etfA-2</i> | Energy Metabolism                          | 12.223 | 11.629 | 10.341 | 12.438 | 3.60E-01 | 7.74E-03 | -0.59 | 2.10  |
| <i>lpg0924</i> | alanine dehydrogenase                                                       | <i>ald</i>    | Energy Metabolism                          | 13.154 | 13.118 | 10.455 | 13.056 | 9.64E-01 | 5.65E-03 | -0.04 | 2.60  |
| <i>lpg0924</i> | alanine dehydrogenase                                                       | <i>ald</i>    | Energy Metabolism                          | 13.151 | 13.135 | 10.154 | 13.090 | 9.82E-01 | 1.29E-02 | -0.02 | 2.94  |
| <i>lpg0925</i> | penicillin binding protein 1A (transpeptidase) (peptidoglyc <i>ponA</i>     |               | Cell envelope synthesis                    | 10.505 | 10.263 | 9.632  | 10.423 | 4.34E-01 | 1.10E-01 | -0.24 | 0.79  |
| <i>lpg0925</i> | penicillin binding protein 1A (transpeptidase) (peptidoglyc <i>ponA</i>     |               | Cell envelope synthesis                    | 10.778 | 10.432 | 9.428  | 10.307 | 2.90E-01 | 6.29E-02 | -0.35 | 0.88  |
| <i>lpg0926</i> | ORF                                                                         |               | ORFs of unknown function (unique)          | 14.245 | 15.704 | 13.776 | 14.914 | 5.51E-05 | 2.57E-04 | 1.46  | 1.14  |
| <i>lpg0926</i> | ORF                                                                         |               | ORFs of unknown function (unique)          | 14.292 | 15.691 | 13.763 | 14.943 | 5.57E-05 | 1.68E-04 | 1.40  | 1.18  |
| <i>lpg0927</i> | type IV pilus biogenesis protein PilM                                       | <i>pilM</i>   | Transport and binding                      | 11.634 | 11.182 | 11.303 | 10.823 | 2.53E-01 | 1.83E-01 | -0.45 | -0.48 |
| <i>lpg0927</i> | type IV pilus biogenesis protein PilM                                       | <i>pilM</i>   | Transport and binding                      | 11.533 | 11.278 | 11.117 | 10.744 | 5.91E-01 | 3.65E-01 | -0.26 | -0.37 |
| <i>lpg0928</i> | type IV pilus biogenesis protein PilN                                       | <i>pilN</i>   | Transport and binding                      | 9.393  | 9.687  | 8.966  | 9.031  | 7.00E-01 | 9.41E-01 | 0.29  | 0.06  |
| <i>lpg0928</i> | type IV pilus biogenesis protein PilN                                       | <i>pilN</i>   | Transport and binding                      | 9.352  | 9.381  | 8.037  | 8.390  | 9.56E-01 | 6.81E-01 | 0.03  | 0.35  |
| <i>lpg0929</i> | type IV pilus biogenesis protein PilO (membrane protein)   <i>pilO</i>      |               | Transport and binding                      | 11.031 | 9.950  | 9.428  | 10.145 | 2.97E-02 | 1.16E-01 | -1.08 | 0.72  |
| <i>lpg0929</i> | type IV pilus biogenesis protein PilO (membrane protein)   <i>pilO</i>      |               | Transport and binding                      | 10.909 | 10.291 | 9.016  | 10.346 | 1.63E-01 | 1.10E-01 | -0.62 | 1.33  |
| <i>lpg0930</i> | type IV pilus biogenesis protein PilP (lipoprotein)   <i>pilP</i>           |               | Transport and binding                      | 11.333 | 10.237 | 11.686 | 10.547 | 4.84E-02 | 1.32E-02 | -1.10 | -1.14 |
| <i>lpg0930</i> | type IV pilus biogenesis protein PilP (lipoprotein)   <i>pilP</i>           |               | Transport and binding                      | 11.321 | 11.014 | 10.923 | 10.961 | 2.44E-01 | 9.53E-01 | -0.31 | 0.04  |
| <i>lpg0931</i> | type IV pilus biogenesis protein PilQ (fimbrial type 4-asse   <i>pilQ</i>   |               | Transport and binding                      | 10.839 | 12.163 | 10.565 | 9.795  | 9.15E-04 | 1.55E-01 | 1.32  | -0.77 |
| <i>lpg0931</i> | type IV pilus biogenesis protein PilQ (fimbrial type 4-asse   <i>pilQ</i>   |               | Transport and binding                      | 11.061 | 11.949 | 10.331 | 9.562  | 4.38E-02 | 1.72E-01 | 0.89  | -0.77 |
| <i>lpg0932</i> | shikimate kinase                                                            |               | Amino Acid Metabolism                      | 11.527 | 11.072 | 11.253 | 10.601 | 2.75E-01 | 1.60E-01 | -0.46 | -0.65 |
| <i>lpg0932</i> | shikimate kinase                                                            |               | Amino Acid Metabolism                      | 11.602 | 11.007 | 10.973 | 10.698 | 2.57E-01 | 6.94E-01 | -0.59 | -0.28 |
| <i>lpg0933</i> | 3-dehydroquinate synthetase                                                 | <i>aroB</i>   | Amino Acid Metabolism                      | 10.485 | 11.551 | 9.789  | 9.638  | 1.02E-02 | 8.25E-01 | 1.07  | -0.15 |
| <i>lpg0933</i> | 3-dehydroquinate synthetase                                                 | <i>aroB</i>   | Amino Acid Metabolism                      | 10.087 | 9.706  | 9.321  | 9.678  | 7.31E-01 | 7.08E-01 | -0.38 | 0.36  |
| <i>lpg0934</i> | DamX-related protein                                                        |               | Chemotaxis / motility / cell division      | 10.744 | 9.239  | 9.661  | 9.098  | 4.28E-02 | 2.54E-01 | -1.51 | -0.56 |
| <i>lpg0934</i> | DamX-related protein                                                        |               | Chemotaxis / motility / cell division      | 10.793 | 9.514  | 9.488  | 9.277  | 2.05E-02 | 5.68E-01 | -1.28 | -0.21 |
| <i>lpg0935</i> | universal stress protein A (UspA)                                           |               | Detoxification / adaptation                | 11.629 | 10.475 | 12.675 | 8.676  | 1.29E-01 | 3.32E-02 | -1.15 | -4.00 |
| <i>lpg0935</i> | universal stress protein A (UspA)                                           |               | Detoxification / adaptation                | 11.778 | 10.933 | 12.784 | 9.525  | 2.06E-01 | 1.96E-03 | -0.85 | -3.26 |
| <i>lpg0936</i> | riboflavin biosynthesis RibF (riboflavin kinase/FMN adenyl <i>ribF</i>      |               | Metabolism of Cofactors and Vitamins       | 10.024 | 10.527 | 9.065  | 10.678 | 3.86E-01 | 5.00E-02 | 0.50  | 1.61  |
| <i>lpg0936</i> | riboflavin biosynthesis RibF (riboflavin kinase/FMN adenyl <i>ribF</i>      |               | Metabolism of Cofactors and Vitamins       | 10.315 | 11.263 | 9.415  | 11.262 | 3.44E-01 | 5.66E-02 | 0.95  | 1.85  |
| <i>lpg0937</i> | isoleucyl tRNA synthetase                                                   | <i>ileS</i>   | Amino Acid Metabolism, Translation         | 9.848  | 10.092 | 10.849 | 9.786  | 7.84E-02 | 5.95E-03 | 0.24  | -1.06 |
| <i>lpg0937</i> | isoleucyl tRNA synthetase                                                   | <i>ileS</i>   | Amino Acid Metabolism, Translation         | 9.729  | 10.288 | 10.426 | 10.070 | 5.75E-02 | 4.77E-01 | 0.56  | -0.36 |

|                |                                                                                     |             |                                          |        |        |        |        |          |          |       |       |
|----------------|-------------------------------------------------------------------------------------|-------------|------------------------------------------|--------|--------|--------|--------|----------|----------|-------|-------|
| <i>lpg0938</i> | lipoprotein signal peptidase                                                        | <i>IspA</i> | Protein fate / hydrolases / secretion    | 12.210 | 11.227 | 11.138 | 11.136 | 7.46E-02 | 9.97E-01 | -0.98 | 0.00  |
| <i>lpg0938</i> | lipoprotein signal peptidase                                                        | <i>IspA</i> | Protein fate / hydrolases / secretion    | 12.239 | 11.743 | 11.260 | 11.826 | 1.25E-02 | 1.21E-01 | -0.50 | 0.57  |
| <i>lpg0939</i> | 2-dehydro-3-deoxy-phosphogluconate aldolase                                         | <i>eda</i>  | Carbohydrate Metabolism, Amino Acid      | 12.620 | 13.983 | 11.489 | 12.765 | 4.66E-04 | 1.72E-06 | 1.36  | 1.28  |
| <i>lpg0939</i> | 2-dehydro-3-deoxy-phosphogluconate aldolase                                         | <i>eda</i>  | Carbohydrate Metabolism, Amino Acid      | 12.334 | 13.935 | 11.388 | 12.715 | 1.94E-03 | 4.30E-06 | 1.60  | 1.33  |
| <i>lpg0940</i> | LidA (translocated substrate of Dot/Icm system) (Uso1 pr <i>lidA</i> )              |             | Toxin production / other pathogen func   | 11.097 | 12.086 | 13.320 | 11.189 | 2.43E-02 | 1.30E-03 | 0.99  | -2.13 |
| <i>lpg0940</i> | LidA (translocated substrate of Dot/Icm system) (Uso1 pr <i>lidA</i> )              |             | Toxin production / other pathogen func   | 11.091 | 11.972 | 13.275 | 11.293 | 3.56E-02 | 1.62E-03 | 0.88  | -1.98 |
| <i>lpg0941</i> | ORF                                                                                 |             | ORFs of unknown function (unique)        | 8.801  | 9.666  | 8.571  | 11.338 | 2.41E-01 | 4.03E-03 | 0.86  | 2.77  |
| <i>lpg0941</i> | ORF                                                                                 |             | ORFs of unknown function (unique)        | 8.926  | 8.413  | 6.950  | 10.000 | 3.44E-01 | 2.71E-02 | -0.51 | 3.05  |
| <i>lpg0942</i> | GTP-binding protein Era                                                             | <i>era</i>  | Signal transduction / other regulatory f | 10.156 | 10.400 | 9.201  | 9.628  | 6.03E-01 | 4.47E-01 | 0.24  | 0.43  |
| <i>lpg0942</i> | GTP-binding protein Era                                                             | <i>era</i>  | Signal transduction / other regulatory f | 10.463 | 10.432 | 9.267  | 9.946  | 9.24E-01 | 2.19E-01 | -0.03 | 0.68  |
| <i>lpg0943</i> | DNA repair protein RecO                                                             | <i>recO</i> | Replication and Repair                   | 10.808 | 10.087 | 11.183 | 10.429 | 8.62E-02 | 1.03E-01 | -0.72 | -0.75 |
| <i>lpg0943</i> | DNA repair protein RecO                                                             | <i>recO</i> | Replication and Repair                   | 10.880 | 10.499 | 11.116 | 10.709 | 3.19E-02 | 9.03E-02 | -0.38 | -0.41 |
| <i>lpg0944</i> | ORF                                                                                 |             | ORFs of unknown function (unique)        | 10.294 | 10.041 | 10.205 | 11.409 | 2.61E-01 | 2.25E-02 | -0.25 | 1.20  |
| <i>lpg0944</i> | ORF                                                                                 |             | ORFs of unknown function (unique)        | 10.749 | 9.737  | 9.908  | 11.396 | 1.68E-01 | 4.84E-02 | -1.01 | 1.49  |
| <i>lpg0945</i> | Gala protein type 1 or 3 (caspase recruitment domain, lei <i>legL1</i> )            |             | Toxin production / other pathogen func   | 10.119 | 10.243 | 10.100 | 9.942  | 8.11E-01 | 7.30E-01 | 0.12  | -0.16 |
| <i>lpg0945</i> | Gala protein type 1 or 3 (caspase recruitment domain, lei <i>legL1</i> )            |             | Toxin production / other pathogen func   | 10.258 | 10.291 | 10.081 | 10.012 | 9.31E-01 | 8.80E-01 | 0.03  | -0.07 |
| <i>lpg0946</i> | pyridoxal phosphate biosynthetic protein PdxJ (pyridoxin <sub>i</sub> <i>pdxJ</i> ) |             | Metabolism of Cofactors and Vitamins     | 10.113 | 12.363 | 9.504  | 12.313 | 1.25E-02 | 4.90E-06 | 2.25  | 2.81  |
| <i>lpg0946</i> | pyridoxal phosphate biosynthetic protein PdxJ (pyridoxin <sub>i</sub> <i>pdxJ</i> ) |             | Metabolism of Cofactors and Vitamins     | 10.857 | 12.397 | 9.295  | 12.306 | 5.14E-04 | 1.68E-04 | 1.54  | 3.01  |
| <i>lpg0947</i> | 2-oxoglutarate ferredoxin oxidoreductase alpha subunit                              |             | Carbohydrate Metabolism, Energy Me       | 11.433 | 11.597 | 11.575 | 11.871 | 7.52E-01 | 2.61E-01 | 0.16  | 0.30  |
| <i>lpg0947</i> | 2-oxoglutarate ferredoxin oxidoreductase alpha subunit                              |             | Carbohydrate Metabolism, Energy Me       | 11.421 | 11.230 | 11.220 | 11.654 | 7.76E-01 | 3.84E-01 | -0.19 | 0.43  |
| <i>lpg0948</i> | 2-oxoglutarate ferredoxin oxidoreductase beta subunit                               | <i>korB</i> | Carbohydrate Metabolism, Energy Me       | 11.241 | 10.435 | 11.558 | 11.172 | 1.18E-01 | 4.68E-01 | -0.81 | -0.39 |
| <i>lpg0948</i> | 2-oxoglutarate ferredoxin oxidoreductase beta subunit                               | <i>korB</i> | Carbohydrate Metabolism, Energy Me       | 11.291 | 11.417 | 11.671 | 11.963 | 8.37E-01 | 5.20E-01 | 0.13  | 0.29  |
| <i>lpg0949</i> | carrier/transport protein (TEGT family)                                             |             | Transport and binding                    | 13.322 | 13.889 | 13.819 | 12.745 | 2.06E-01 | 8.29E-03 | 0.57  | -1.07 |
| <i>lpg0949</i> | carrier/transport protein (TEGT family)                                             |             | Transport and binding                    | 12.828 | 13.777 | 13.446 | 12.591 | 1.06E-01 | 5.82E-02 | 0.95  | -0.85 |
| <i>lpg0950</i> | nitrilase (carbon-nitrogen hydrolase)                                               |             | Protein fate / hydrolases / secretion    | 11.788 | 11.470 | 11.504 | 11.445 | 1.20E-01 | 7.84E-01 | -0.32 | -0.06 |
| <i>lpg0950</i> | nitrilase (carbon-nitrogen hydrolase)                                               |             | Protein fate / hydrolases / secretion    | 11.842 | 11.760 | 11.511 | 11.555 | 7.79E-01 | 8.16E-01 | -0.08 | 0.04  |
| <i>lpg0951</i> | TldD protein (modulator of DNA gyrase) (suppresses inhi <i>tldD</i> )               |             | Signal transduction / other regulatory f | 12.123 | 12.525 | 12.279 | 13.049 | 8.45E-02 | 6.80E-04 | 0.40  | 0.77  |
| <i>lpg0951</i> | TldD protein (modulator of DNA gyrase) (suppresses inhi <i>tldD</i> )               |             | Signal transduction / other regulatory f | 12.093 | 12.524 | 12.192 | 13.087 | 5.95E-02 | 2.06E-04 | 0.43  | 0.89  |
| <i>lpg0952</i> | phosphoesterase (serine protease)                                                   | <i>ychK</i> | Protein fate / hydrolases / secretion    | 11.552 | 10.326 | 11.740 | 11.242 | 8.23E-02 | 2.91E-01 | -1.23 | -0.50 |
| <i>lpg0952</i> | phosphoesterase (serine protease)                                                   | <i>ychK</i> | Protein fate / hydrolases / secretion    | 11.592 | 10.786 | 11.648 | 11.537 | 2.65E-03 | 5.36E-01 | -0.81 | -0.11 |
| <i>lpg0953</i> | AMP-binding protein (long chain fatty acid-CoA ligase) (AMP depend <sub>t</sub>     |             | Lipid Metabolism                         | 10.523 | 9.304  | 12.579 | 9.175  | 5.13E-02 | 1.89E-04 | -1.22 | -3.40 |
| <i>lpg0953</i> | AMP-binding protein (long chain fatty acid-CoA ligase) (AMP depend <sub>t</sub>     |             | Lipid Metabolism                         | 10.469 | 9.660  | 12.550 | 10.080 | 2.11E-01 | 3.53E-04 | -0.81 | -2.47 |
| <i>lpg0954</i> | transcription repair coupling factor                                                | <i>mid</i>  | Transcription, Replication and Repair    | 11.684 | 10.155 | 10.093 | 11.795 | 1.43E-03 | 1.64E-02 | -1.53 | 1.70  |
| <i>lpg0954</i> | transcription repair coupling factor                                                | <i>mid</i>  | Transcription, Replication and Repair    | 11.533 | 9.939  | 10.027 | 11.818 | 1.67E-03 | 2.26E-02 | -1.59 | 1.79  |
| <i>lpg0955</i> | transmembrane protein (competence-induced protein) (DNA recombi                     |             | Replication and Repair                   | 9.718  | 7.885  | 8.763  | 8.599  | 8.36E-02 | 7.81E-01 | -1.83 | -0.16 |
| <i>lpg0955</i> | transmembrane protein (competence-induced protein) (DNA recombi                     |             | Replication and Repair                   | 9.660  | 8.316  | 8.282  | 8.553  | 1.06E-01 | 7.48E-01 | -1.34 | 0.27  |
| <i>lpg0956</i> | hypothetical protein                                                                |             | Unknown / hypothetical proteins          | 11.646 | 12.267 | 11.132 | 10.721 | 5.91E-02 | 2.44E-01 | 0.62  | -0.41 |
| <i>lpg0956</i> | hypothetical protein                                                                |             | Unknown / hypothetical proteins          | 11.707 | 11.944 | 10.820 | 10.598 | 2.45E-01 | 3.92E-01 | 0.24  | -0.22 |
| <i>lpg0957</i> | hypothetical                                                                        |             | Unknown / hypothetical proteins          | 11.471 | 10.901 | 10.195 | 9.295  | 4.00E-01 | 1.20E-01 | -0.57 | -0.90 |
| <i>lpg0957</i> | hypothetical                                                                        |             | Unknown / hypothetical proteins          | 11.561 | 11.474 | 10.066 | 9.432  | 7.77E-01 | 2.61E-01 | -0.09 | -0.63 |
| <i>lpg0958</i> | DNA ligase (NAD-dependent)                                                          | <i>lig</i>  | Replication and Repair                   | 10.026 | 9.191  | 9.496  | 9.081  | 2.24E-02 | 5.20E-01 | -0.84 | -0.41 |
| <i>lpg0958</i> | DNA ligase (NAD-dependent)                                                          | <i>lig</i>  | Replication and Repair                   | 9.989  | 9.219  | 9.718  | 9.547  | 8.54E-02 | 6.72E-01 | -0.77 | -0.17 |
| <i>lpg0959</i> | bacterial extracellular solute-binding protein (peptide ABC <i>hbpA</i> )           |             | Transport and binding                    | 9.784  | 9.731  | 9.982  | 9.383  | 8.92E-01 | 3.43E-01 | -0.05 | -0.60 |
| <i>lpg0959</i> | bacterial extracellular solute-binding protein (peptide ABC <i>hbpA</i> )           |             | Transport and binding                    | 9.742  | 9.215  | 8.927  | 9.637  | 7.61E-02 | 2.62E-02 | -0.53 | 0.71  |
| <i>lpg0960</i> | peptide ABC transporter, permease protein (oligopeptide transport) (d               |             | Transport and binding                    | 9.546  | 9.108  | 8.947  | 9.208  | 2.53E-01 | 7.58E-01 | -0.44 | 0.26  |
| <i>lpg0960</i> | peptide ABC transporter, permease protein (oligopeptide transport) (d               |             | Transport and binding                    | 9.467  | 9.506  | 9.048  | 9.375  | 9.28E-01 | 6.48E-01 | 0.04  | 0.33  |
| <i>lpg0961</i> | peptide ABC transporter, permease protein (oligopeptide transport) (d               |             | Transport and binding                    | 10.580 | 9.618  | 9.672  | 9.968  | 2.00E-02 | 2.76E-01 | -0.96 | 0.30  |
| <i>lpg0961</i> | peptide ABC transporter, permease protein (oligopeptide transport) (d               |             | Transport and binding                    | 10.400 | 9.633  | 9.466  | 9.859  | 6.16E-02 | 1.55E-01 | -0.77 | 0.39  |
| <i>lpg0962</i> | DNA polymerase III, alpha subunit                                                   | <i>dnaE</i> | Replication and Repair                   | 10.181 | 9.346  | 10.584 | 10.756 | 3.42E-01 | 4.21E-01 | -0.83 | 0.17  |
| <i>lpg0962</i> | DNA polymerase III, alpha subunit                                                   | <i>dnaE</i> | Replication and Repair                   | 10.571 | 10.497 | 10.675 | 11.034 | 7.42E-01 | 4.22E-01 | -0.07 | 0.36  |
| <i>lpg0963</i> | ORF                                                                                 |             | ORFs of unknown function (unique)        | 11.416 | 13.501 | 12.272 | 10.547 | 6.62E-04 | 1.70E-03 | 2.09  | -1.73 |
| <i>lpg0963</i> | ORF                                                                                 |             | ORFs of unknown function (unique)        | 11.455 | 13.765 | 12.354 | 10.955 | 3.94E-04 | 3.98E-02 | 2.31  | -1.40 |
| <i>lpg0964</i> | 4-hydroxybenzoate octaprenyltransferase (UbiA prenyltransferase far                 |             | Metabolism of Cofactors and Vitamins     | 11.894 | 10.795 | 11.084 | 10.238 | 2.24E-03 | 3.64E-02 | -1.10 | -0.85 |
| <i>lpg0964</i> | 4-hydroxybenzoate octaprenyltransferase (UbiA prenyltransferase far                 |             | Metabolism of Cofactors and Vitamins     | 11.759 | 11.325 | 11.020 | 10.387 | 5.99E-01 | 4.23E-01 | -0.43 | -0.63 |
| <i>lpg0965</i> | LphB                                                                                |             | Named proteins of general function       | 10.745 | 9.830  | 10.688 | 8.845  | 4.66E-03 | 1.14E-02 | -0.92 | -1.84 |
| <i>lpg0965</i> | LphB                                                                                |             | Named proteins of general function       | 10.869 | 9.677  | 10.906 | 9.481  | 5.14E-03 | 2.31E-02 | -1.19 | -1.42 |
| <i>lpg0966</i> | nucleoside-diphosphate sugar epimerases (epimerase/dehydratase)                     |             | Nucleotide Metabolism                    | 11.291 | 11.498 | 11.574 | 11.781 | 6.00E-01 | 4.41E-01 | 0.21  | 0.21  |
| <i>lpg0966</i> | nucleoside-diphosphate sugar epimerases (epimerase/dehydratase)                     |             | Nucleotide Metabolism                    | 11.436 | 11.353 | 11.633 | 11.908 | 8.45E-01 | 3.43E-01 | -0.08 | 0.27  |
| <i>lpg0967</i> | ORF                                                                                 |             | ORFs of unknown function (unique)        | 9.060  | 9.670  | 12.224 | 9.358  | 3.15E-01 | 3.57E-03 | 0.61  | -2.87 |
| <i>lpg0967</i> | ORF                                                                                 |             | ORFs of unknown function (unique)        | 8.998  | 9.667  | 12.133 | 9.289  | 2.14E-01 | 5.20E-03 | 0.67  | -2.84 |
| <i>lpg0968</i> | ORF                                                                                 |             | ORFs of unknown function (unique)        | 10.103 | 12.759 | 12.227 | 9.577  | 1.54E-04 | 1.44E-02 | 2.66  | -2.65 |
| <i>lpg0968</i> | ORF                                                                                 |             | ORFs of unknown function (unique)        | 10.152 | 12.717 | 12.197 | 9.658  | 9.41E-04 | 1.61E-02 | 2.57  | -2.54 |
| <i>lpg0969</i> | ORF                                                                                 |             | ORFs of unknown function (unique)        | 11.461 | 15.219 | 13.174 | 11.117 | 2.72E-05 | 4.28E-03 | 3.76  | -2.06 |
| <i>lpg0969</i> | ORF                                                                                 |             | ORFs of unknown function (unique)        | 11.474 | 15.318 | 13.219 | 11.192 | 9.61E-06 | 4.08E-03 | 3.84  | -2.03 |

|                |                                                                          |              |        |        |        |        |          |          |       |       |
|----------------|--------------------------------------------------------------------------|--------------|--------|--------|--------|--------|----------|----------|-------|-------|
| <i>lpg0970</i> | amino acid permeases (arginine permease, histidine permease, gamr        |              | 10.288 | 10.434 | 9.953  | 10.245 | 7.68E-01 | 6.37E-01 | 0.15  | 0.29  |
| <i>lpg0970</i> | amino acid permeases (arginine permease, histidine permease, gamr        |              | 10.552 | 10.253 | 9.962  | 10.343 | 4.08E-01 | 3.81E-01 | -0.30 | 0.38  |
| <i>lpg0971</i> | ecto-ATP diphosphohydrolase II (ectonucleoside triphosphate diphos       |              | 9.619  | 9.772  | 9.651  | 8.705  | 7.81E-01 | 1.73E-01 | 0.15  | -0.95 |
| <i>lpg0971</i> | ecto-ATP diphosphohydrolase II (ectonucleoside triphosphate diphos       |              | 9.477  | 9.270  | 9.069  | 8.920  | 7.76E-01 | 8.80E-01 | -0.21 | -0.15 |
| <i>lpg0972</i> | tRNA-Thr                                                                 |              | 11.139 | 10.371 | 10.401 | 10.290 | 4.29E-02 | 7.64E-01 | -0.77 | -0.11 |
| <i>lpg0972</i> | tRNA-Thr                                                                 |              | 11.005 | 10.621 | 10.741 | 10.983 | 3.84E-01 | 4.31E-01 | -0.38 | 0.24  |
| <i>lpg0973</i> | hypothetical                                                             |              | 11.817 | 10.690 | 10.129 | 10.520 | 1.92E-01 | 5.75E-01 | -1.13 | 0.39  |
| <i>lpg0973</i> | hypothetical                                                             |              | 12.203 | 10.746 | 10.196 | 10.698 | 1.51E-02 | 4.28E-01 | -1.46 | 0.50  |
| <i>lpg0974</i> | ORF                                                                      |              | 11.303 | 9.678  | 10.583 | 9.889  | 2.76E-03 | 1.97E-01 | -1.62 | -0.69 |
| <i>lpg0974</i> | ORF                                                                      |              | 11.428 | 9.945  | 10.324 | 9.841  | 6.65E-03 | 4.42E-01 | -1.48 | -0.48 |
| <i>lpg0975</i> | transmembrane protein (transporter, DME family)                          |              | 9.369  | 9.289  | 9.318  | 7.846  | 7.95E-01 | 1.07E-02 | -0.08 | -1.47 |
| <i>lpg0975</i> | transmembrane protein (transporter, DME family)                          |              | 9.441  | 8.582  | 8.688  | 8.931  | 1.73E-01 | 6.27E-01 | -0.86 | 0.24  |
| <i>lpg0976</i> | antirestriction protein                                                  |              | 9.505  | 10.882 | 10.147 | 10.157 | 5.42E-03 | 9.77E-01 | 1.38  | 0.01  |
| <i>lpg0976</i> | antirestriction protein                                                  |              | 9.493  | 11.917 | 10.161 | 10.797 | 8.10E-05 | 1.61E-01 | 2.42  | 0.64  |
| <i>lpg0977</i> | single strand DNA binding protein (ssb)                                  |              | 10.321 | 11.117 | 9.249  | 11.218 | 9.25E-02 | 1.35E-03 | 0.80  | 1.97  |
| <i>lpg0977</i> | single strand DNA binding protein (ssb)                                  |              | 10.408 | 11.193 | 9.075  | 11.613 | 1.29E-02 | 1.87E-06 | 0.79  | 2.54  |
| <i>lpg0978</i> | ORF                                                                      |              | 10.551 | 11.533 | 10.208 | 11.560 | 1.53E-03 | 6.21E-06 | 0.98  | 1.35  |
| <i>lpg0978</i> | ORF                                                                      |              | 10.605 | 11.254 | 9.968  | 11.474 | 1.94E-02 | 1.72E-05 | 0.65  | 1.51  |
| <i>lpg0979</i> | aminoglycoside N(6)acetyltransferase                                     | <i>aacA4</i> | 10.947 | 9.595  | 11.140 | 9.662  | 3.77E-04 | 6.57E-04 | -1.35 | -1.48 |
| <i>lpg0979</i> | aminoglycoside N(6)acetyltransferase                                     | <i>aacA4</i> | 10.829 | 9.620  | 10.770 | 9.824  | 2.39E-03 | 1.13E-02 | -1.21 | -0.95 |
| <i>lpg0980</i> | putative integrase                                                       |              | 7.903  | 8.340  | 8.456  | 8.830  | 5.51E-01 | 4.82E-01 | 0.44  | 0.37  |
| <i>lpg0980</i> | putative integrase                                                       |              | 7.655  | 7.796  | 8.655  | 9.147  | 8.23E-01 | 4.57E-01 | 0.14  | 0.49  |
| <i>lpg0981</i> | ORF                                                                      |              | 6.563  | 8.537  | 8.707  | 7.552  | 8.81E-02 | 1.73E-01 | 1.97  | -1.15 |
| <i>lpg0981</i> | ORF                                                                      |              | 7.159  | 9.519  | 8.713  | 9.560  | 1.43E-01 | 4.63E-01 | 2.36  | 0.85  |
| <i>lpg0982</i> | hypothetical                                                             |              | 9.850  | 9.974  | 11.307 | 9.691  | 8.79E-01 | 9.93E-02 | 0.12  | -1.62 |
| <i>lpg0982</i> | hypothetical                                                             |              | 9.238  | 9.597  | 8.549  | 9.711  | 6.99E-01 | 5.78E-01 | 0.36  | 1.16  |
| <i>lpg0983</i> | conjugative coupling factor TraD                                         |              | 8.996  | 9.263  | 8.945  | 8.846  | 5.83E-01 | 8.73E-01 | 0.27  | -0.10 |
| <i>lpg0983</i> | conjugative coupling factor TraD                                         |              | 9.314  | 9.625  | 8.931  | 9.491  | 4.00E-01 | 1.24E-01 | 0.31  | 0.56  |
| <i>lpg0984</i> | ORF hypothetical? phosphatidylcholine desaturase? cytochrome b? t        |              | 8.734  | 8.853  | 8.890  | 8.643  | 8.40E-01 | 7.21E-01 | 0.12  | -0.25 |
| <i>lpg0984</i> | ORF hypothetical? phosphatidylcholine desaturase? cytochrome b? t        |              | 8.513  | 9.194  | 8.908  | 8.921  | 1.88E-01 | 9.79E-01 | 0.68  | 0.01  |
| <i>lpg0985</i> | small ORF (56aa)                                                         |              | 13.076 | 11.136 | 11.366 | 11.253 | 3.57E-03 | 8.83E-01 | -1.94 | -0.11 |
| <i>lpg0985</i> | small ORF (56aa)                                                         |              | 13.091 | 11.432 | 11.460 | 11.524 | 6.96E-04 | 9.13E-01 | -1.66 | 0.06  |
| <i>lpg0986</i> | membrane protein                                                         |              | 7.389  | 8.261  | 9.025  | 7.277  | 3.40E-01 | 2.89E-02 | 0.87  | -1.75 |
| <i>lpg0986</i> | membrane protein                                                         |              | 8.730  | 9.000  | 8.967  | 8.201  | 7.48E-01 | 4.39E-01 | 0.27  | -0.77 |
| <i>lpg0987</i> | membrane protein?                                                        |              | 8.884  | 8.582  | 10.922 | 7.964  | 6.42E-01 | 1.09E-02 | -0.30 | -2.96 |
| <i>lpg0987</i> | membrane protein?                                                        |              | 9.310  | 8.957  | 11.148 | 8.992  | 3.74E-01 | 4.72E-03 | -0.35 | -2.16 |
| <i>lpg0988</i> | conserved hypothetical protein                                           |              | 8.678  | 8.746  | 9.596  | 8.436  | 8.65E-01 | 5.35E-03 | 0.07  | -1.16 |
| <i>lpg0988</i> | conserved hypothetical protein                                           |              | 8.975  | 8.935  | 9.791  | 9.268  | 9.39E-01 | 1.81E-01 | -0.04 | -0.52 |
| <i>lpg0989</i> | hypothetical (pilus assembly protein?) Type IV secretory protein VirB4   |              | 8.335  | 8.480  | 9.392  | 8.963  | 8.11E-01 | 3.04E-01 | 0.14  | -0.43 |
| <i>lpg0989</i> | hypothetical (pilus assembly protein?) Type IV secretory protein VirB4   |              | 8.108  | 9.005  | 9.307  | 9.155  | 2.16E-02 | 7.27E-01 | 0.90  | -0.15 |
| <i>lpg0990</i> | conserved hypothetical protein                                           |              | 11.628 | 12.931 | 11.009 | 12.687 | 1.51E-02 | 1.66E-06 | 1.30  | 1.68  |
| <i>lpg0990</i> | conserved hypothetical protein                                           |              | 11.716 | 13.010 | 10.837 | 12.679 | 7.06E-03 | 1.10E-05 | 1.29  | 1.84  |
| <i>lpg0991</i> | exported protein?                                                        |              | 8.333  | 6.767  | 10.066 | 8.316  | 3.56E-02 | 1.31E-02 | -1.57 | -1.75 |
| <i>lpg0991</i> | exported protein?                                                        |              | 8.291  | 8.012  | 9.168  | 8.000  | 5.24E-01 | 5.29E-02 | -0.28 | -1.17 |
| <i>lpg0992</i> | conserved hypothetical protein                                           |              | 13.590 | 15.406 | 14.655 | 15.367 | 6.03E-05 | 1.24E-01 | 1.82  | 0.71  |
| <i>lpg0992</i> | conserved hypothetical protein                                           |              | 13.611 | 15.296 | 14.672 | 15.397 | 8.65E-05 | 9.40E-02 | 1.69  | 0.73  |
| <i>lpg0993</i> | conserved hypothetical protein                                           |              | 8.406  | 8.784  | 9.139  | 8.567  | 6.35E-01 | 4.38E-01 | 0.38  | -0.57 |
| <i>lpg0993</i> | conserved hypothetical protein                                           |              | 8.529  | 8.256  | 8.685  | 8.582  | 7.98E-01 | 9.10E-01 | -0.27 | -0.10 |
| <i>lpg0994</i> | ORF                                                                      |              | 8.888  | 7.948  | 9.103  | 7.468  | 6.82E-02 | 3.75E-02 | -0.94 | -1.63 |
| <i>lpg0994</i> | ORF                                                                      |              | 8.108  | 8.076  | 8.954  | 8.818  | 9.64E-01 | 7.56E-01 | -0.03 | -0.14 |
| <i>lpg0995</i> | ORF                                                                      |              | 10.108 | 9.307  | 10.799 | 9.969  | 8.08E-03 | 1.00E-01 | -0.80 | -0.83 |
| <i>lpg0995</i> | ORF                                                                      |              | 10.070 | 9.509  | 10.688 | 10.041 | 7.38E-02 | 2.63E-01 | -0.56 | -0.65 |
| <i>lpg0996</i> | ORF                                                                      |              | 6.331  | 6.340  | 8.559  | 10.137 | 9.98E-01 | 3.86E-01 | 0.01  | 1.58  |
| <i>lpg0996</i> | ORF                                                                      |              | 7.900  | 7.771  | 7.688  | 10.935 | 9.75E-01 | 3.18E-01 | -0.13 | 3.25  |
| <i>lpg0997</i> | small ORF (108aa)                                                        |              | 7.797  | 8.021  | 7.924  | 7.169  | 7.55E-01 | 6.06E-01 | 0.22  | -0.76 |
| <i>lpg0997</i> | small ORF (108aa)                                                        |              | 8.122  | 8.260  | 7.834  | 7.125  | 7.99E-01 | 5.86E-01 | 0.14  | -0.71 |
| <i>lpg0998</i> | conserved hypothetical protein                                           |              | 6.791  | 4.862  | 7.778  | 7.977  | 3.73E-01 | 8.65E-01 | -1.93 | 0.20  |
| <i>lpg0998</i> | conserved hypothetical protein                                           |              | 4.616  | 7.078  | 7.253  | 8.739  | 2.37E-01 | 2.75E-01 | 2.46  | 1.49  |
| <i>lpg0999</i> | hypothetical                                                             |              | 11.744 | 10.946 | 11.447 | 10.206 | 7.28E-02 | 1.81E-02 | -0.80 | -1.24 |
| <i>lpg0999</i> | hypothetical                                                             |              | 11.467 | 10.338 | 11.182 | 10.195 | 6.08E-02 | 1.38E-01 | -1.13 | -0.99 |
| <i>lpg1000</i> | protein product; similar to putative exported protein protein product; s |              | 7.371  | 7.883  | 8.999  | 8.124  | 6.61E-01 | 2.28E-01 | 0.51  | -0.88 |
| <i>lpg1000</i> | protein product; similar to putative exported protein protein product; s |              | 8.471  | 8.665  | 8.460  | 8.448  | 7.37E-01 | 9.85E-01 | 0.19  | -0.01 |
| <i>lpg1001</i> | ORF                                                                      |              | 8.074  | 7.864  | 7.750  | 7.461  | 8.52E-01 | 7.98E-01 | -0.21 | -0.29 |
| <i>lpg1001</i> | ORF                                                                      |              | 5.493  | 7.378  | 6.780  | 7.442  | 5.08E-01 | 7.86E-01 | 1.88  | 0.66  |

|                |                                                                         |               |                                           |        |        |        |        |          |          |       |       |
|----------------|-------------------------------------------------------------------------|---------------|-------------------------------------------|--------|--------|--------|--------|----------|----------|-------|-------|
| <i>lpg1002</i> | putative exported protein                                               |               | Unknown / hypothetical proteins           | 9.166  | 8.650  | 9.183  | 7.957  | 8.97E-02 | 1.37E-01 | -0.52 | -1.23 |
| <i>lpg1002</i> | putative exported protein                                               |               | Unknown / hypothetical proteins           | 8.702  | 9.474  | 8.815  | 10.361 | 5.69E-01 | 2.06E-01 | 0.77  | 1.55  |
| <i>lpg1003</i> | carbon storage regulator                                                | <i>csrA-2</i> | Named proteins of general function        | 8.161  | 8.730  | 9.130  | 8.529  | 2.13E-01 | 3.13E-01 | 0.57  | -0.60 |
| <i>lpg1003</i> | carbon storage regulator                                                | <i>csrA-2</i> | Named proteins of general function        | 7.955  | 8.766  | 8.718  | 8.933  | 1.33E-01 | 6.54E-01 | 0.81  | 0.21  |
| <i>lpg1004</i> | ORF                                                                     |               | ORFs of unknown function (unique)         | 7.849  | 7.764  | 8.525  | 10.057 | 9.32E-01 | 4.56E-02 | -0.09 | 1.53  |
| <i>lpg1004</i> | ORF                                                                     |               | ORFs of unknown function (unique)         | 7.452  | 8.903  | 8.373  | 10.127 | 2.02E-01 | 4.89E-02 | 1.45  | 1.75  |
| <i>lpg1005</i> | LvrA                                                                    | <i>lvrA</i>   | Transport and binding                     | 10.452 | 11.128 | 10.869 | 10.953 | 1.79E-02 | 8.43E-01 | 0.68  | 0.08  |
| <i>lpg1005</i> | LvrA                                                                    | <i>lvrA</i>   | Transport and binding                     | 10.535 | 11.052 | 10.955 | 11.059 | 1.58E-01 | 8.12E-01 | 0.52  | 0.10  |
| <i>lpg1006</i> | cobalt/zinc/cadmium efflux RND transporter, outer membrane protein      |               | Transport and binding                     | 9.219  | 9.872  | 8.738  | 9.849  | 2.05E-01 | 2.18E-01 | 0.65  | 1.11  |
| <i>lpg1006</i> | cobalt/zinc/cadmium efflux RND transporter, outer membrane protein      |               | Transport and binding                     | 9.228  | 9.463  | 8.441  | 9.706  | 3.35E-01 | 2.13E-02 | 0.23  | 1.27  |
| <i>lpg1007</i> | cation efflux system HelB (HlyD family secretion protein)               |               | Transport and binding                     | 10.442 | 9.712  | 11.179 | 8.563  | 1.88E-03 | 6.24E-04 | -0.73 | -2.62 |
| <i>lpg1007</i> | cation efflux system HelB (HlyD family secretion protein)               |               | Transport and binding                     | 10.330 | 9.443  | 10.486 | 8.625  | 3.63E-03 | 4.37E-04 | -0.89 | -1.86 |
| <i>lpg1008</i> | cobalt/zinc/cadmium efflux RND transporter, permease protein HelA (     |               | Transport and binding                     | 9.135  | 7.326  | 9.081  | 7.760  | 6.17E-02 | 3.06E-01 | -1.81 | -1.32 |
| <i>lpg1008</i> | cobalt/zinc/cadmium efflux RND transporter, permease protein HelA (     |               | Transport and binding                     | 8.263  | 9.393  | 8.621  | 8.844  | 1.30E-01 | 6.44E-01 | 1.13  | 0.22  |
| <i>lpg1009</i> | cadmium translocating P-type ATPase CadA (Pb-efflux A' <i>cadA-1</i>    |               | Metabolism of Complex Carbohydrate:       | 9.851  | 9.028  | 10.475 | 10.304 | 3.08E-01 | 6.92E-01 | -0.82 | -0.17 |
| <i>lpg1009</i> | cadmium translocating P-type ATPase CadA (Pb-efflux A' <i>cadA-1</i>    |               | Metabolism of Complex Carbohydrate:       | 10.049 | 10.350 | 10.330 | 10.782 | 2.92E-01 | 1.49E-01 | 0.30  | 0.45  |
| <i>lpg1010</i> | cadmium efflux ATPase (cadmium resistance protein)                      |               | Transport and binding                     | 9.293  | 8.121  | 8.765  | 9.957  | 2.57E-02 | 6.12E-02 | -1.17 | 1.19  |
| <i>lpg1010</i> | cadmium efflux ATPase (cadmium resistance protein)                      |               | Transport and binding                     | 9.314  | 8.277  | 8.304  | 10.052 | 2.87E-02 | 9.74E-03 | -1.04 | 1.75  |
| <i>lpg1011</i> | uncharacterized conserved protein                                       |               | Unknown / hypothetical proteins           | 9.854  | 9.245  | 12.504 | 7.961  | 3.76E-01 | 1.96E-03 | -0.61 | -4.54 |
| <i>lpg1011</i> | uncharacterized conserved protein                                       |               | Unknown / hypothetical proteins           | 9.787  | 8.827  | 12.529 | 9.060  | 2.51E-01 | 3.27E-02 | -0.96 | -3.47 |
| <i>lpg1012</i> | small ORF (65aa)                                                        |               | ORFs of unknown function (unique)         | 10.133 | 9.771  | 12.433 | 7.798  | 5.82E-01 | 1.05E-02 | -0.36 | -4.63 |
| <i>lpg1012</i> | small ORF (65aa)                                                        |               | ORFs of unknown function (unique)         | 10.050 | 10.439 | 12.465 | 9.249  | 6.21E-01 | 3.61E-03 | 0.39  | -3.22 |
| <i>lpg1013</i> | small ORF (83aa)                                                        |               | ORFs of unknown function (unique)         | 8.775  | 7.697  | 8.936  | 8.576  | 1.04E-01 | 5.38E-01 | -1.08 | -0.36 |
| <i>lpg1013</i> | small ORF (83aa)                                                        |               | ORFs of unknown function (unique)         | 8.952  | 8.123  | 8.913  | 8.970  | 4.45E-01 | 9.20E-01 | -0.83 | 0.06  |
| <i>lpg1014</i> | (dehydrogenase?)                                                        |               | Named proteins of general function        | 10.063 | 9.905  | 10.183 | 10.418 | 5.55E-01 | 5.28E-01 | -0.16 | 0.24  |
| <i>lpg1014</i> | (dehydrogenase?)                                                        |               | Named proteins of general function        | 9.984  | 9.622  | 10.032 | 10.346 | 3.26E-01 | 4.51E-01 | -0.36 | 0.31  |
| <i>lpg1015</i> | unknown Legionella protein, benzil (sepiapterin, ketoacyl <i>yueD</i>   |               | Metabolism of Cofactors and Vitamins      | 10.277 | 10.799 | 12.378 | 7.842  | 4.74E-01 | 2.33E-02 | 0.52  | -4.54 |
| <i>lpg1015</i> | unknown Legionella protein, benzil (sepiapterin, ketoacyl <i>yueD</i>   |               | Metabolism of Cofactors and Vitamins      | 10.320 | 10.493 | 12.572 | 8.814  | 7.95E-01 | 5.21E-03 | 0.17  | -3.76 |
| <i>lpg1016</i> | unknown Legionella protein (putative secreted protein?)                 |               | Named proteins of general function        | 11.231 | 11.300 | 10.754 | 11.485 | 9.01E-01 | 2.56E-01 | 0.07  | 0.73  |
| <i>lpg1016</i> | unknown Legionella protein (putative secreted protein?)                 |               | Named proteins of general function        | 11.272 | 11.817 | 9.830  | 11.973 | 3.46E-01 | 2.10E-02 | 0.55  | 2.14  |
| <i>lpg1017</i> | cation efflux transporter (calcium transporting ATPase) ( <i>c mgtA</i> |               | Metabolism of Complex Carbohydrate:       | 10.581 | 10.529 | 10.773 | 9.765  | 8.80E-01 | 1.72E-01 | -0.05 | -1.01 |
| <i>lpg1017</i> | cation efflux transporter (calcium transporting ATPase) ( <i>c mgtA</i> |               | Metabolism of Complex Carbohydrate:       | 10.450 | 9.490  | 10.720 | 10.075 | 3.58E-01 | 8.77E-02 | -0.96 | -0.65 |
| <i>lpg1018</i> | chemiosmotic efflux system B protein C (outer membrane efflux prote     |               | Transport and binding                     | 7.589  | 7.530  | 8.806  | 8.017  | 9.38E-01 | 3.94E-01 | -0.06 | -0.79 |
| <i>lpg1018</i> | chemiosmotic efflux system B protein C (outer membrane efflux prote     |               | Transport and binding                     | 8.365  | 8.334  | 9.228  | 8.671  | 9.74E-01 | 5.49E-01 | -0.03 | -0.56 |
| <i>lpg1019</i> | chemiosmotic efflux system B protein B (heavy metal efflux)             |               | Transport and binding                     | 7.718  | 7.039  | 8.860  | 6.972  | 2.91E-01 | 3.15E-02 | -0.68 | -1.89 |
| <i>lpg1019</i> | chemiosmotic efflux system B protein B (heavy metal efflux)             |               | Transport and binding                     | 7.930  | 6.746  | 8.612  | 8.031  | 2.70E-01 | 1.99E-01 | -1.18 | -0.58 |
| <i>lpg1020</i> | chemiosmotic efflux system B protein A (silver efflux pump)             |               | Transport and binding                     | 7.719  | 7.662  | 8.626  | 6.812  | 9.46E-01 | 1.43E-01 | -0.06 | -1.81 |
| <i>lpg1020</i> | chemiosmotic efflux system B protein A (silver efflux pump)             |               | Transport and binding                     | 8.253  | 8.392  | 8.862  | 9.833  | 8.89E-01 | 2.53E-01 | 0.14  | 0.97  |
| <i>lpg1021</i> | metallo-beta lactamase family (cleavage and polyadenylation specific    |               | Detoxification / adaptation, Transcriptic | 8.869  | 8.552  | 10.179 | 7.956  | 7.30E-01 | 5.64E-02 | -0.32 | -2.22 |
| <i>lpg1021</i> | metallo-beta lactamase family (cleavage and polyadenylation specific    |               | Detoxification / adaptation, Transcriptic | 8.071  | 9.832  | 9.886  | 9.391  | 2.51E-01 | 7.03E-01 | 1.76  | -0.50 |
| <i>lpg1022</i> | thymidine phosphorylase (TdRPase) (thymidine/pyrimidir <i>deoA</i>      |               | Nucleotide Metabolism                     | 8.110  | 9.545  | 10.032 | 9.057  | 1.89E-02 | 2.30E-01 | 1.44  | -0.98 |
| <i>lpg1022</i> | thymidine phosphorylase (TdRPase) (thymidine/pyrimidir <i>deoA</i>      |               | Nucleotide Metabolism                     | 7.958  | 9.518  | 9.933  | 9.939  | 6.33E-02 | 9.92E-01 | 1.56  | 0.01  |
| <i>lpg1023</i> | ribose-phosphate pyrophosphokinase (RPPK) (phosphoribosyl pyropl        |               | Carbohydrate Metabolism, Nucleotide       | 8.763  | 7.586  | 9.298  | 8.260  | 1.16E-01 | 3.24E-01 | -1.18 | -1.04 |
| <i>lpg1023</i> | ribose-phosphate pyrophosphokinase (RPPK) (phosphoribosyl pyropl        |               | Carbohydrate Metabolism, Nucleotide       | 8.009  | 9.776  | 9.589  | 9.023  | 9.52E-01 | 3.55E-01 | -0.03 | -0.57 |
| <i>lpg1024</i> | copper efflux ATPase (cation transport P-type ATPase) (heavy metal t    |               | Transport and binding                     | 8.696  | 9.768  | 10.411 | 8.692  | 4.17E-02 | 3.92E-03 | 1.07  | -1.72 |
| <i>lpg1024</i> | copper efflux ATPase (cation transport P-type ATPase) (heavy metal t    |               | Transport and binding                     | 9.078  | 9.887  | 10.358 | 9.112  | 6.93E-02 | 9.60E-02 | 0.81  | -1.25 |
| <i>lpg1025</i> | sensory box/GGDEF/EAL family (membrane protein) <i>yegE</i>             |               | Signal transduction / other regulatory f  | 8.754  | 9.676  | 11.708 | 8.532  | 2.66E-01 | 7.78E-02 | 0.92  | -3.18 |
| <i>lpg1025</i> | sensory box/GGDEF/EAL family (membrane protein) <i>yegE</i>             |               | Signal transduction / other regulatory f  | 8.467  | 9.415  | 11.398 | 8.649  | 2.58E-01 | 1.48E-02 | 0.95  | -2.75 |
| <i>lpg1026</i> | putative outer membrane lipoprotein                                     |               | Named proteins of general function        | 10.876 | 11.088 | 11.148 | 10.568 | 5.37E-01 | 9.23E-02 | 0.21  | -0.58 |
| <i>lpg1026</i> | putative outer membrane lipoprotein                                     |               | Named proteins of general function        | 10.738 | 11.349 | 11.065 | 10.847 | 7.88E-04 | 6.54E-01 | 0.61  | -0.22 |
| <i>lpg1027</i> | chemiosmotic efflux system C protein C (metal ion efflux outer membi    |               | Transport and binding                     | 9.824  | 10.238 | 11.147 | 10.609 | 3.71E-01 | 1.87E-02 | 0.41  | -0.54 |
| <i>lpg1027</i> | chemiosmotic efflux system C protein C (metal ion efflux outer membi    |               | Transport and binding                     | 9.872  | 10.594 | 11.119 | 11.037 | 2.47E-01 | 8.62E-01 | 0.72  | -0.08 |
| <i>lpg1028</i> | chemiosmotic efflux system C protein B                                  |               | Transport and binding                     | 9.911  | 9.763  | 10.937 | 10.007 | 7.79E-01 | 1.27E-02 | -0.15 | -0.93 |
| <i>lpg1028</i> | chemiosmotic efflux system C protein B                                  |               | Transport and binding                     | 9.893  | 9.471  | 10.921 | 10.031 | 4.94E-01 | 8.17E-03 | -0.42 | -0.89 |
| <i>lpg1029</i> | chemiosmotic efflux system protein A-like protein                       |               | Transport and binding                     | 10.263 | 9.466  | 11.868 | 10.205 | 4.13E-01 | 5.43E-03 | -0.80 | -1.66 |
| <i>lpg1029</i> | chemiosmotic efflux system protein A-like protein                       |               | Transport and binding                     | 10.283 | 10.030 | 11.798 | 10.404 | 7.51E-01 | 1.99E-03 | -0.25 | -1.39 |
| <i>lpg1030</i> | hypothetical                                                            |               | Unknown / hypothetical proteins           | 11.806 | 12.763 | 13.480 | 11.609 | 2.06E-02 | 3.01E-03 | 0.96  | -1.87 |
| <i>lpg1030</i> | hypothetical                                                            |               | Unknown / hypothetical proteins           | 11.870 | 12.825 | 13.460 | 11.707 | 1.31E-02 | 4.45E-03 | 0.95  | -1.75 |
| <i>lpg1031</i> | small ORF (114aa)                                                       |               | ORFs of unknown function (unique)         | 10.479 | 11.438 | 11.482 | 9.283  | 4.01E-02 | 8.27E-03 | 0.96  | -2.20 |
| <i>lpg1031</i> | small ORF (114aa)                                                       |               | ORFs of unknown function (unique)         | 10.659 | 11.699 | 12.076 | 10.435 | 7.77E-03 | 3.92E-03 | 1.04  | -1.64 |
| <i>lpg1032</i> | conserved hypothetical protein                                          |               | Unknown / hypothetical proteins           | 9.871  | 9.055  | 12.273 | 9.286  | 1.91E-01 | 2.15E-04 | -0.82 | -2.99 |
| <i>lpg1032</i> | conserved hypothetical protein                                          |               | Unknown / hypothetical proteins           | 10.127 | 9.775  | 12.321 | 9.575  | 4.85E-01 | 4.31E-04 | -0.35 | -2.75 |
| <i>lpg1033</i> | hypothetical?                                                           |               | Unknown / hypothetical proteins           | 9.735  | 9.314  | 10.021 | 8.766  | 4.60E-01 | 1.56E-02 | -0.42 | -1.26 |
| <i>lpg1033</i> | hypothetical?                                                           |               | Unknown / hypothetical proteins           | 10.088 | 10.229 | 10.626 | 9.733  | 2.93E-01 | 1.67E-03 | 0.14  | -0.89 |



|                |                                                                        |                                          |        |        |        |        |          |          |       |       |
|----------------|------------------------------------------------------------------------|------------------------------------------|--------|--------|--------|--------|----------|----------|-------|-------|
| <i>lpg1034</i> | small ORF (175aa)                                                      | ORFs of unknown function (unique)        | 11.535 | 11.327 | 11.219 | 11.847 | 4.70E-01 | 4.20E-02 | -0.21 | 0.63  |
| <i>lpg1034</i> | small ORF (175aa)                                                      | ORFs of unknown function (unique)        | 11.376 | 11.352 | 11.114 | 11.782 | 9.39E-01 | 2.27E-02 | -0.02 | 0.67  |
| <i>lpg1035</i> | copper efflux ATPase (copper resistance protein A) CopA <i>pcoA</i>    | Transport and binding                    | 10.538 | 11.773 | 9.892  | 12.360 | 1.42E-02 | 8.81E-04 | 1.23  | 2.47  |
| <i>lpg1035</i> | copper efflux ATPase (copper resistance protein A) CopA <i>pcoA</i>    | Transport and binding                    | 10.458 | 13.091 | 9.744  | 13.586 | 3.86E-05 | 8.39E-05 | 2.63  | 3.84  |
| <i>lpg1036</i> | outer membrane lipoprotein (L. pneumophila)                            | Named proteins of general function       | 9.269  | 10.144 | 10.500 | 9.362  | 9.25E-02 | 8.67E-02 | 0.87  | -1.14 |
| <i>lpg1036</i> | outer membrane lipoprotein (L. pneumophila)                            | Named proteins of general function       | 9.688  | 9.575  | 10.357 | 9.290  | 7.60E-01 | 6.66E-04 | -0.11 | -1.07 |
| <i>lpg1037</i> | small ORF (55aa)                                                       | ORFs of unknown function (unique)        | 9.868  | 10.961 | 11.111 | 10.220 | 5.24E-02 | 7.28E-02 | 1.09  | -0.89 |
| <i>lpg1037</i> | small ORF (55aa)                                                       | ORFs of unknown function (unique)        | 9.948  | 10.329 | 10.960 | 10.250 | 5.34E-01 | 1.65E-01 | 0.38  | -0.71 |
| <i>lpg1038</i> | VrrB (contains histidine/glycine rich portion)                         | Named proteins of general function       | 9.611  | 9.233  | 11.925 | 9.461  | 6.96E-01 | 6.31E-02 | -0.38 | -2.46 |
| <i>lpg1038</i> | VrrB (contains histidine/glycine rich portion)                         | Named proteins of general function       | 10.653 | 10.173 | 12.038 | 10.325 | 4.44E-01 | 9.49E-02 | -0.48 | -1.71 |
| <i>lpg1039</i> | hypothetical                                                           | Unknown / hypothetical proteins          | 11.137 | 12.839 | 11.094 | 12.141 | 3.68E-04 | 3.86E-03 | 1.70  | 1.05  |
| <i>lpg1039</i> | hypothetical                                                           | Unknown / hypothetical proteins          | 11.170 | 12.846 | 10.999 | 12.066 | 2.53E-04 | 5.02E-03 | 1.68  | 1.07  |
| <i>lpg1040</i> | hypothetical (transmembrane protein) (nickel-cobalt-cadmium resistar   | Transport and binding                    | 8.767  | 7.809  | 11.192 | 8.448  | 3.74E-01 | 8.98E-03 | -0.96 | -2.74 |
| <i>lpg1040</i> | hypothetical (transmembrane protein) (nickel-cobalt-cadmium resistar   | Transport and binding                    | 8.613  | 8.844  | 11.283 | 8.916  | 7.88E-01 | 9.99E-03 | 0.23  | -2.37 |
| <i>lpg1041</i> | small ORF (166aa) (hypothetical transporter; glycerol-3-phosphate tr   | Transport and binding                    | 8.761  | 8.438  | 11.292 | 8.256  | 6.84E-01 | 3.37E-02 | -0.32 | -3.04 |
| <i>lpg1041</i> | small ORF (166aa) (hypothetical transporter; glycerol-3-phosphate tr   | Transport and binding                    | 8.550  | 8.204  | 11.277 | 8.762  | 6.22E-01 | 3.71E-02 | -0.35 | -2.52 |
| <i>lpg1042</i> | hypothetical                                                           | Unknown / hypothetical proteins          | 9.476  | 10.071 | 11.176 | 10.736 | 5.59E-02 | 1.83E-01 | 0.60  | -0.44 |
| <i>lpg1042</i> | hypothetical                                                           | Unknown / hypothetical proteins          | 9.538  | 10.068 | 11.212 | 11.726 | 2.94E-01 | 1.60E-01 | 0.53  | 0.51  |
| <i>lpg1043</i> | hypothetical (blI4815 of B. japonicum)                                 | Unknown / hypothetical proteins          | 10.865 | 10.845 | 11.869 | 10.830 | 9.48E-01 | 1.10E-01 | -0.02 | -1.04 |
| <i>lpg1043</i> | hypothetical (blI4815 of B. japonicum)                                 | Unknown / hypothetical proteins          | 10.915 | 10.656 | 11.972 | 10.996 | 6.18E-01 | 9.60E-02 | -0.26 | -0.98 |
| <i>lpg1044</i> | oxidoreductase, FAD-binding (ferredoxin oxidoreductase) (iron-sulfur   | Energy Metabolism                        | 11.595 | 11.502 | 12.443 | 10.907 | 8.06E-01 | 7.11E-04 | -0.09 | -1.54 |
| <i>lpg1044</i> | oxidoreductase, FAD-binding (ferredoxin oxidoreductase) (iron-sulfur   | Energy Metabolism                        | 11.645 | 10.655 | 12.476 | 11.114 | 3.48E-01 | 7.56E-04 | -0.99 | -1.36 |
| <i>lpg1045</i> | small ORF (64aa)?                                                      | ORFs of unknown function (unique)        | 7.724  | 8.981  | 9.635  | 6.850  | 1.44E-01 | 8.02E-02 | 1.26  | -2.78 |
| <i>lpg1045</i> | small ORF (64aa)?                                                      | ORFs of unknown function (unique)        | 7.332  | 8.896  | 9.699  | 7.355  | 1.20E-01 | 1.08E-02 | 1.56  | -2.34 |
| <i>lpg1046</i> | small ORF (129aa)                                                      | ORFs of unknown function (unique)        | 9.088  | 9.156  | 10.893 | 9.695  | 9.14E-01 | 8.65E-02 | 0.07  | -1.20 |
| <i>lpg1046</i> | small ORF (129aa)                                                      | ORFs of unknown function (unique)        | 9.450  | 8.970  | 10.772 | 9.591  | 3.74E-01 | 2.99E-02 | -0.48 | -1.18 |
| <i>lpg1047</i> | ATP synthase gamma subunit C-terminus homolog <i>atpG</i>              | Energy Metabolism                        | 8.748  | 7.500  | 9.128  | 7.235  | 5.18E-02 | 1.05E-01 | -1.25 | -1.89 |
| <i>lpg1047</i> | ATP synthase gamma subunit C-terminus homolog <i>atpG</i>              | Energy Metabolism                        | 8.831  | 7.488  | 9.212  | 8.321  | 3.85E-02 | 1.82E-01 | -1.34 | -0.89 |
| <i>lpg1048</i> | ATP synthase F1, subunit alpha (F0F1-type ATP synthase alpha subu      | Energy Metabolism                        | 10.391 | 11.776 | 11.855 | 10.949 | 2.26E-02 | 3.70E-02 | 1.38  | -0.91 |
| <i>lpg1048</i> | ATP synthase F1, subunit alpha (F0F1-type ATP synthase alpha subu      | Energy Metabolism                        | 10.325 | 12.934 | 11.936 | 11.179 | 2.87E-05 | 7.95E-02 | 2.61  | -0.76 |
| <i>lpg1049</i> | H(+) transporting ATP synthase, subunit B (F0F1-type ATPase subuni     | Energy Metabolism                        | 8.550  | 9.240  | 9.835  | 7.988  | 3.14E-01 | 6.55E-02 | 0.69  | -1.85 |
| <i>lpg1049</i> | H(+) transporting ATP synthase, subunit B (F0F1-type ATPase subuni     | Energy Metabolism                        | 8.271  | 8.607  | 9.613  | 8.420  | 7.22E-01 | 4.40E-02 | 0.34  | -1.19 |
| <i>lpg1050</i> | ATP synthase C subunit (H+ transporting ATP synthase) (ATP syntha      | Energy Metabolism                        | 9.741  | 8.388  | 10.870 | 9.199  | 1.87E-01 | 3.92E-03 | -1.35 | -1.67 |
| <i>lpg1050</i> | ATP synthase C subunit (H+ transporting ATP synthase) (ATP syntha      | Energy Metabolism                        | 9.747  | 9.128  | 10.838 | 9.489  | 2.23E-01 | 3.10E-02 | -0.62 | -1.35 |
| <i>lpg1051</i> | ATP synthase subunit A (F0F1-type ATP synthase F0, su <i>atpB</i>      | Energy Metabolism                        | 9.583  | 8.184  | 10.379 | 8.606  | 2.13E-03 | 4.58E-03 | -1.40 | -1.77 |
| <i>lpg1051</i> | ATP synthase subunit A (F0F1-type ATP synthase F0, su <i>atpB</i>      | Energy Metabolism                        | 9.607  | 8.519  | 10.624 | 9.073  | 8.38E-02 | 1.42E-02 | -1.09 | -1.55 |
| <i>lpg1052</i> | ATP synthase, putative                                                 | Named proteins of general function       | 9.077  | 8.866  | 8.265  | 7.897  | 6.63E-01 | 7.93E-01 | -0.21 | -0.37 |
| <i>lpg1052</i> | ATP synthase, putative                                                 | Named proteins of general function       | 9.313  | 7.618  | 7.677  | 8.007  | 6.44E-02 | 7.58E-01 | -1.69 | 0.33  |
| <i>lpg1053</i> | F0F1-type ATP synthase epsilon subunit??)                              | Energy Metabolism                        | 10.232 | 9.326  | 10.939 | 9.281  | 2.09E-02 | 3.68E-03 | -0.91 | -1.66 |
| <i>lpg1053</i> | F0F1-type ATP synthase epsilon subunit??)                              | Energy Metabolism                        | 10.266 | 9.205  | 10.840 | 9.707  | 1.83E-03 | 2.88E-02 | -1.06 | -1.13 |
| <i>lpg1054</i> | ATP synthase F1, beta chain (F0F1-type ATPase beta su <i>atpD</i>      | Energy Metabolism                        | 10.335 | 10.089 | 10.808 | 11.123 | 4.43E-01 | 1.77E-01 | -0.25 | 0.32  |
| <i>lpg1054</i> | ATP synthase F1, beta chain (F0F1-type ATPase beta su <i>atpD</i>      | Energy Metabolism                        | 10.361 | 10.117 | 10.257 | 11.090 | 3.74E-01 | 1.13E-01 | -0.24 | 0.83  |
| <i>lpg1055</i> | hypothetical protein                                                   | Unknown / hypothetical proteins          | 10.916 | 10.547 | 12.567 | 10.253 | 2.49E-01 | 1.26E-04 | -0.37 | -2.31 |
| <i>lpg1055</i> | hypothetical protein                                                   | Unknown / hypothetical proteins          | 10.826 | 10.295 | 12.532 | 10.228 | 5.55E-02 | 1.98E-04 | -0.53 | -2.30 |
| <i>lpg1056</i> | guanylate cyclase                                                      | Signal transduction / other regulatory f | 12.012 | 11.290 | 13.126 | 11.585 | 6.70E-02 | 8.53E-04 | -0.72 | -1.54 |
| <i>lpg1056</i> | guanylate cyclase                                                      | Signal transduction / other regulatory f | 11.942 | 11.424 | 13.088 | 11.657 | 1.07E-01 | 1.22E-03 | -0.52 | -1.43 |
| <i>lpg1057</i> | sensory box/GGDEF family (diguanylate cyclase/phosphodiesterase        | Signal transduction / other regulatory f | 10.549 | 10.015 | 11.596 | 10.882 | 5.62E-01 | 2.89E-01 | -0.53 | -0.71 |
| <i>lpg1057</i> | sensory box/GGDEF family (diguanylate cyclase/phosphodiesterase        | Signal transduction / other regulatory f | 10.401 | 9.663  | 11.233 | 10.605 | 1.10E-01 | 1.04E-01 | -0.74 | -0.63 |
| <i>lpg1058</i> | polyhydroxyalkanoic synthase (PHA synthase) (poly(3-hy <i>phbC</i>     | Amino Acid Metabolism, Metabolism o      | 10.820 | 11.488 | 12.790 | 10.868 | 2.55E-01 | 4.43E-02 | 0.67  | -1.92 |
| <i>lpg1058</i> | polyhydroxyalkanoic synthase (PHA synthase) (poly(3-hy <i>phbC</i>     | Amino Acid Metabolism, Metabolism o      | 10.930 | 11.561 | 12.880 | 11.206 | 2.83E-01 | 8.15E-02 | 0.63  | -1.67 |
| <i>lpg1059</i> | acetoacetyl CoA reductase <i>phaB</i>                                  | Carbohydrate Metabolism                  | 11.017 | 10.459 | 11.782 | 10.531 | 3.51E-02 | 1.92E-03 | -0.56 | -1.25 |
| <i>lpg1059</i> | acetoacetyl CoA reductase <i>phaB</i>                                  | Carbohydrate Metabolism                  | 10.915 | 10.767 | 11.724 | 10.679 | 4.79E-01 | 1.66E-03 | -0.15 | -1.05 |
| <i>lpg1060</i> | cold shock domain family protein, COG1278: cold shock proteins         | Detoxification / adaptation              | 10.076 | 12.296 | 10.174 | 12.177 | 5.79E-04 | 3.54E-03 | 2.22  | 2.00  |
| <i>lpg1060</i> | cold shock domain family protein, COG1278: cold shock proteins         | Detoxification / adaptation              | 10.167 | 12.325 | 10.165 | 12.217 | 5.60E-05 | 3.57E-03 | 2.16  | 2.05  |
| <i>lpg1061</i> | ORF hypothetical?                                                      | Unknown / hypothetical proteins          | 10.781 | 11.303 | 10.652 | 11.182 | 5.28E-01 | 1.99E-01 | 0.52  | 0.53  |
| <i>lpg1061</i> | ORF hypothetical?                                                      | Unknown / hypothetical proteins          | 10.544 | 11.798 | 10.471 | 11.557 | 1.36E-02 | 2.23E-03 | 1.25  | 1.09  |
| <i>lpg1062</i> | TPR repeat protein (enhanced entry protein EnhC)                       | Toxin production / other pathogen func   | 11.886 | 11.091 | 11.525 | 11.106 | 1.18E-03 | 1.73E-01 | -0.80 | -0.42 |
| <i>lpg1062</i> | TPR repeat protein (enhanced entry protein EnhC)                       | Toxin production / other pathogen func   | 11.906 | 10.986 | 11.511 | 11.195 | 8.94E-05 | 2.42E-01 | -0.92 | -0.32 |
| <i>lpg1063</i> | proline/betaine transporter (ProP6) (MFS transporter) (lo <i>proP6</i> | Transport and binding                    | 9.425  | 10.096 | 9.907  | 9.891  | 1.86E-01 | 9.48E-01 | 0.67  | -0.02 |
| <i>lpg1063</i> | proline/betaine transporter (ProP6) (MFS transporter) (lo <i>proP6</i> | Transport and binding                    | 9.515  | 10.666 | 9.997  | 10.407 | 6.73E-02 | 3.27E-01 | 1.15  | 0.41  |
| <i>lpg1064</i> | polypeptide deformylase (peptide deformylase)                          | Translation                              | 10.332 | 10.113 | 10.875 | 9.618  | 5.36E-01 | 1.00E-03 | -0.22 | -1.26 |
| <i>lpg1064</i> | polypeptide deformylase (peptide deformylase)                          | Translation                              | 10.647 | 10.110 | 10.989 | 10.044 | 8.61E-02 | 2.27E-03 | -0.54 | -0.95 |
| <i>lpg1065</i> | ORF                                                                    | ORFs of unknown function (unique)        | 10.193 | 10.541 | 9.909  | 10.804 | 6.77E-01 | 2.71E-02 | 0.35  | 0.89  |
| <i>lpg1065</i> | ORF                                                                    | ORFs of unknown function (unique)        | 10.397 | 10.517 | 8.819  | 10.219 | 8.12E-01 | 2.33E-01 | 0.12  | 1.40  |

|                |                                                                         |            |                                        |        |        |        |        |          |          |       |       |
|----------------|-------------------------------------------------------------------------|------------|----------------------------------------|--------|--------|--------|--------|----------|----------|-------|-------|
| <i>lpg1066</i> | ORF                                                                     |            | ORFs of unknown function (unique)      | 10.886 | 11.714 | 11.083 | 10.618 | 3.27E-02 | 3.16E-01 | 0.83  | -0.46 |
| <i>lpg1066</i> | ORF                                                                     |            | ORFs of unknown function (unique)      | 10.740 | 12.056 | 11.065 | 10.764 | 4.38E-04 | 3.49E-01 | 1.32  | -0.30 |
| <i>lpg1067</i> | small ORF (85aa)                                                        |            | ORFs of unknown function (unique)      | 9.398  | 9.306  | 10.804 | 7.050  | 8.92E-01 | 3.84E-03 | -0.09 | -3.75 |
| <i>lpg1067</i> | small ORF (85aa)                                                        |            | ORFs of unknown function (unique)      | 9.766  | 9.907  | 10.984 | 8.259  | 8.22E-01 | 4.16E-03 | 0.14  | -2.72 |
| <i>lpg1068</i> | small ORF (67aa)                                                        |            | ORFs of unknown function (unique)      | 11.547 | 10.979 | 12.020 | 10.146 | 2.61E-01 | 3.78E-03 | -0.57 | -1.87 |
| <i>lpg1068</i> | small ORF (67aa)                                                        |            | ORFs of unknown function (unique)      | 11.497 | 11.090 | 12.022 | 10.166 | 3.63E-01 | 2.91E-03 | -0.41 | -1.86 |
| <i>lpg1069</i> | similar to AbiD phage protein                                           |            | Viral functions / Phage / Transposases | 9.661  | 8.473  | 9.008  | 8.985  | 2.39E-01 | 9.54E-01 | -1.19 | -0.02 |
| <i>lpg1069</i> | similar to AbiD phage protein                                           |            | Viral functions / Phage / Transposases | 10.376 | 8.993  | 8.408  | 9.807  | 7.77E-02 | 1.38E-01 | -1.38 | 1.40  |
| <i>lpg1070</i> | integrase (phage related)                                               | <i>int</i> | Viral functions / Phage / Transposases | 9.209  | 10.880 | 9.167  | 10.912 | 2.71E-04 | 1.38E-03 | 1.67  | 1.75  |
| <i>lpg1070</i> | integrase (phage related)                                               | <i>int</i> | Viral functions / Phage / Transposases | 8.700  | 10.840 | 8.461  | 10.857 | 4.13E-04 | 1.82E-04 | 2.14  | 2.40  |
| <i>lpg1071</i> | transposase TnpA (Uma4)                                                 |            | Viral functions / Phage / Transposases | 8.833  | 9.752  | 9.738  | 8.832  | 1.38E-01 | 4.64E-01 | 0.92  | -0.91 |
| <i>lpg1071</i> | transposase TnpA (Uma4)                                                 |            | Viral functions / Phage / Transposases | 7.907  | 9.886  | 8.764  | 9.650  | 4.17E-03 | 1.23E-01 | 1.98  | 0.89  |
| <i>lpg1073</i> | ORF                                                                     |            | ORFs of unknown function (unique)      | 10.947 | 10.925 | 9.280  | 10.810 | 9.67E-01 | 7.35E-03 | -0.02 | 1.53  |
| <i>lpg1073</i> | ORF                                                                     |            | ORFs of unknown function (unique)      | 10.552 | 10.994 | 8.032  | 10.667 | 6.25E-01 | 3.26E-02 | 0.44  | 2.64  |
| <i>lpg1074</i> | hypothetical                                                            |            | Unknown / hypothetical proteins        | 8.840  | 10.194 | 9.033  | 9.523  | 1.43E-01 | 2.82E-01 | 1.35  | 0.49  |
| <i>lpg1074</i> | hypothetical                                                            |            | Unknown / hypothetical proteins        | 9.324  | 10.291 | 8.947  | 10.077 | 1.07E-01 | 6.74E-02 | 0.97  | 1.13  |
| <i>lpg1075</i> | small ORF (113aa)                                                       |            | ORFs of unknown function (unique)      | 9.924  | 9.141  | 9.165  | 8.678  | 3.23E-02 | 3.41E-01 | -0.78 | -0.49 |
| <i>lpg1075</i> | small ORF (113aa)                                                       |            | ORFs of unknown function (unique)      | 9.962  | 8.651  | 9.162  | 9.007  | 3.81E-02 | 7.92E-01 | -1.31 | -0.16 |
| <i>lpg1076</i> | small ORF (90aa)                                                        |            | ORFs of unknown function (unique)      | 6.186  | 9.112  | 9.062  | 9.342  | 3.57E-01 | 9.25E-01 | 2.93  | 0.28  |
| <i>lpg1076</i> | small ORF (90aa)                                                        |            | ORFs of unknown function (unique)      | 4.422  | 5.799  | 7.062  | 7.698  | 7.61E-01 | 7.89E-01 | 1.38  | 0.64  |
| <i>lpg1077</i> | inner membrane protein                                                  |            | Named proteins of general function     | 7.703  | 5.501  | 8.239  | 6.714  | 1.39E-02 | 3.62E-01 | -2.20 | -1.53 |
| <i>lpg1077</i> | inner membrane protein                                                  |            | Named proteins of general function     | 7.238  | 7.111  | 7.925  | 8.023  | 8.89E-01 | 9.22E-01 | -0.13 | 0.10  |
| <i>lpg1078</i> | small ORF (123aa)                                                       |            | ORFs of unknown function (unique)      | 10.580 | 8.928  | 9.235  | 8.726  | 1.65E-03 | 5.34E-01 | -1.65 | -0.51 |
| <i>lpg1078</i> | small ORF (123aa)                                                       |            | ORFs of unknown function (unique)      | 10.507 | 9.360  | 9.121  | 9.053  | 1.15E-02 | 9.42E-01 | -1.15 | -0.07 |
| <i>lpg1079</i> | small ORF (56aa)?                                                       |            | ORFs of unknown function (unique)      | 8.647  | 7.903  | 8.371  | 6.844  | 1.13E-01 | 8.17E-02 | -0.74 | -1.53 |
| <i>lpg1079</i> | small ORF (56aa)?                                                       |            | ORFs of unknown function (unique)      | 8.288  | 6.898  | 7.151  | 6.427  | 1.69E-01 | 6.84E-01 | -1.39 | -0.72 |
| <i>lpg1080</i> | deoxyguanosine triphosphate triphosphohydrolase (dGTP triphospho        |            | Nucleotide Metabolism                  | 10.969 | 12.696 | 12.706 | 9.177  | 3.07E-02 | 2.11E-03 | 1.73  | -3.53 |
| <i>lpg1080</i> | deoxyguanosine triphosphate triphosphohydrolase (dGTP triphospho        |            | Nucleotide Metabolism                  | 10.996 | 12.654 | 12.798 | 9.393  | 3.53E-02 | 1.53E-03 | 1.66  | -3.41 |
| <i>lpg1081</i> | reverse transcriptase                                                   |            | Viral functions / Phage / Transposases | 6.744  | 7.652  | 7.400  | 7.400  | 2.33E-01 |          | 0.91  |       |
| <i>lpg1081</i> | reverse transcriptase                                                   |            | Viral functions / Phage / Transposases | 6.556  | 8.540  | 7.168  | 7.168  | 1.09E-01 |          | 1.98  |       |
| <i>lpg1082</i> | small ORF (135aa)                                                       |            | ORFs of unknown function (unique)      | 7.048  | 8.412  | 7.798  | 8.192  | 2.77E-01 | 6.91E-01 | 1.36  | 0.39  |
| <i>lpg1082</i> | small ORF (135aa)                                                       |            | ORFs of unknown function (unique)      | 7.337  | 8.472  | 7.486  | 7.951  | 2.83E-01 | 6.32E-01 | 1.14  | 0.47  |
| <i>lpg1083</i> | conserved hypothetical protein                                          |            | Unknown / hypothetical proteins        | 9.671  | 8.790  | 12.339 | 8.722  | 2.88E-01 | 5.99E-03 | -0.88 | -3.62 |
| <i>lpg1083</i> | conserved hypothetical protein                                          |            | Unknown / hypothetical proteins        | 9.652  | 8.077  | 12.393 | 9.399  | 2.74E-01 | 2.65E-02 | -1.58 | -2.99 |
| <i>lpg1084</i> | hypothetical (cytosolic protein)                                        |            | Named proteins of general function     | 11.076 | 12.191 | 11.535 | 11.535 | 7.27E-06 | 2.29E-01 | 1.12  | 0.30  |
| <i>lpg1084</i> | hypothetical (cytosolic protein)                                        |            | Named proteins of general function     | 10.913 | 13.036 | 11.025 | 11.445 | 3.69E-05 | 2.13E-01 | 2.12  | 0.42  |
| <i>lpg1085</i> | phage related integrase (site specific recombinase)                     |            | Viral functions / Phage / Transposases | 10.120 | 11.123 | 11.375 | 11.024 | 2.32E-01 | 5.45E-01 | 1.00  | -0.35 |
| <i>lpg1085</i> | phage related integrase (site specific recombinase)                     |            | Viral functions / Phage / Transposases | 10.171 | 11.801 | 11.275 | 11.306 | 1.84E-05 | 9.45E-01 | 1.63  | 0.03  |
| <i>lpg1087</i> | virulence factor MviN (integral membrane protein, inner membrane), r    |            | Toxin production / other pathogen func | 9.981  | 9.486  | 9.490  | 8.717  | 3.92E-01 | 1.72E-01 | -0.50 | -0.77 |
| <i>lpg1087</i> | virulence factor MviN (integral membrane protein, inner membrane), r    |            | Toxin production / other pathogen func | 9.918  | 9.853  | 9.800  | 9.087  | 8.83E-01 | 2.35E-01 | -0.07 | -0.71 |
| <i>lpg1088</i> | nucleotidyltransferase PLUS glutamate rich protein GrpB PLUS ribos      |            | Protein fate / hydrolases / secretion  | 9.329  | 7.713  | 8.146  | 7.177  | 3.80E-03 | 2.20E-01 | -1.62 | -0.97 |
| <i>lpg1088</i> | nucleotidyltransferase PLUS glutamate rich protein GrpB PLUS ribos      |            | Protein fate / hydrolases / secretion  | 8.818  | 7.837  | 7.357  | 8.389  | 1.53E-01 | 1.16E-01 | -0.98 | 1.03  |
| <i>lpg1089</i> | methyltransferase (N-methyltransferase?)                                |            | Named proteins of general function     | 10.337 | 10.261 | 11.107 | 10.047 | 8.58E-01 | 1.72E-02 | -0.08 | -1.06 |
| <i>lpg1089</i> | methyltransferase (N-methyltransferase?)                                |            | Named proteins of general function     | 10.050 | 12.013 | 9.467  | 9.638  | 6.29E-05 | 7.76E-01 | 1.96  | 0.17  |
| <i>lpg1090</i> | hypothetical                                                            |            | Unknown / hypothetical proteins        | 7.207  | 7.661  | 8.066  | 6.485  | 5.48E-01 | 2.49E-01 | 0.45  | -1.58 |
| <i>lpg1090</i> | hypothetical                                                            |            | Unknown / hypothetical proteins        | 6.612  | 7.637  | 7.522  | 6.668  | 1.47E-01 | 4.31E-01 | 1.02  | -0.85 |
| <i>lpg1091</i> | ORF acetyltransferase?                                                  |            | Unknown / hypothetical proteins        | 9.606  | 10.926 | 8.303  | 9.330  | 1.42E-03 | 2.18E-01 | 1.32  | 1.03  |
| <i>lpg1091</i> | ORF acetyltransferase?                                                  |            | Unknown / hypothetical proteins        | 10.015 | 11.019 | 8.061  | 9.537  | 1.17E-02 | 8.57E-02 | 1.00  | 1.48  |
| <i>lpg1092</i> | beta-phosphoglucomutase (phosphatase/phosphohexomutase)                 |            | Metabolism of Complex Carbohydrate:    | 6.898  | 5.895  | 9.134  | 2.031  | 4.03E-01 | 2.85E-02 | -1.00 | -7.10 |
| <i>lpg1092</i> | beta-phosphoglucomutase (phosphatase/phosphohexomutase)                 |            | Metabolism of Complex Carbohydrate:    | 7.585  | 6.814  | 10.044 | 7.634  | 6.30E-01 | 1.09E-02 | -0.77 | -2.41 |
| <i>lpg1093</i> | cation efflux transporter (calcium transporting ATPase) (c <i>pacL</i>  |            | Metabolism of Complex Carbohydrate:    | 9.121  | 9.569  | 9.462  | 8.660  | 3.66E-01 | 1.64E-01 | 0.45  | -0.80 |
| <i>lpg1093</i> | cation efflux transporter (calcium transporting ATPase) (c <i>pacL</i>  |            | Metabolism of Complex Carbohydrate:    | 9.097  | 9.785  | 9.374  | 9.652  | 3.02E-01 | 7.31E-01 | 0.69  | 0.28  |
| <i>lpg1094</i> | chemiosmotic efflux system B protein C (outer membrane efflux prote     |            | Transport and binding                  | 8.813  | 7.675  | 9.540  | 6.638  | 3.26E-02 | 1.93E-03 | -1.14 | -2.90 |
| <i>lpg1094</i> | chemiosmotic efflux system B protein C (outer membrane efflux prote     |            | Transport and binding                  | 8.914  | 8.067  | 9.522  | 7.001  | 1.82E-01 | 2.36E-04 | -0.85 | -2.52 |
| <i>lpg1095</i> | chemiosmotic efflux system B protein B (heavy metal efflux) (cation e   |            | Transport and binding                  | 11.322 | 11.080 | 12.754 | 11.309 | 6.40E-01 | 4.35E-03 | -0.24 | -1.44 |
| <i>lpg1095</i> | chemiosmotic efflux system B protein B (heavy metal efflux) (cation e   |            | Transport and binding                  | 11.585 | 12.123 | 12.914 | 12.463 | 1.07E-01 | 2.07E-01 | 0.54  | -0.45 |
| <i>lpg1096</i> | chemiosmotic efflux system B protein A (silver efflux pump) (cation eff |            | Transport and binding                  | 8.707  | 8.976  | 8.895  | 8.976  | 8.31E-01 | 2.09E-01 | 0.12  | -0.78 |
| <i>lpg1096</i> | chemiosmotic efflux system B protein A (silver efflux pump) (cation eff |            | Transport and binding                  | 8.886  | 8.995  | 9.849  | 9.263  | 7.81E-01 | 1.65E-01 | 0.11  | -0.59 |
| <i>lpg1097</i> | polyhydroxyalkanoic synthase (PHA synthase) (poly(3-hy <i>phbC</i>      |            | Carbohydrate Metabolism, Amino Acid    | 9.096  | 9.427  | 11.558 | 10.251 | 3.66E-01 | 4.08E-02 | 0.33  | -1.31 |
| <i>lpg1097</i> | polyhydroxyalkanoic synthase (PHA synthase) (poly(3-hy <i>phbC</i>      |            | Carbohydrate Metabolism, Amino Acid    | 9.536  | 9.975  | 11.019 | 11.659 | 1.78E-01 | 1.08E-01 | 0.44  | -0.64 |
| <i>lpg1098</i> | small ORF (63aa)?                                                       |            | ORFs of unknown function (unique)      | 10.085 | 9.762  | 12.805 | 8.233  | 7.42E-01 | 2.83E-03 | -0.32 | -4.57 |
| <i>lpg1098</i> | small ORF (63aa)?                                                       |            | ORFs of unknown function (unique)      | 10.003 | 9.223  | 12.749 | 9.107  | 5.18E-01 | 7.47E-03 | -0.78 | -3.64 |
| <i>lpg1099</i> | small ORF (152aa)                                                       |            | ORFs of unknown function (unique)      | 10.730 | 10.672 | 10.599 | 10.274 | 9.42E-01 | 5.88E-01 | -0.06 | -0.32 |
| <i>lpg1099</i> | small ORF (152aa)                                                       |            | ORFs of unknown function (unique)      | 10.831 | 10.621 | 10.328 | 10.347 | 7.47E-01 | 9.77E-01 | -0.21 | 0.02  |

|                |                                                                                  |                                          |        |        |        |        |          |          |       |       |
|----------------|----------------------------------------------------------------------------------|------------------------------------------|--------|--------|--------|--------|----------|----------|-------|-------|
| <i>lpg1100</i> | proton transporter (ExoD protein) (exopolysaccharide synthesis prote             | Transport and binding, Metabolism of C   | 9.086  | 7.111  | 8.997  | 6.688  | 6.25E-02 | 9.52E-03 | -1.97 | -2.31 |
| <i>lpg1100</i> | proton transporter (ExoD protein) (exopolysaccharide synthesis prote             | Transport and binding, Metabolism of C   | 8.987  | 7.223  | 8.488  | 6.543  | 3.00E-02 | 1.68E-02 | -1.76 | -1.94 |
| <i>lpg1101</i> | ORF                                                                              | ORFs of unknown function (unique)        | 8.628  | 9.601  | 8.827  | 9.510  | 6.41E-02 | 8.60E-02 | 0.97  | 0.68  |
| <i>lpg1101</i> | ORF                                                                              | ORFs of unknown function (unique)        | 8.693  | 9.175  | 8.147  | 9.633  | 4.28E-01 | 1.45E-01 | 0.48  | 1.49  |
| <i>lpg1102</i> | ORF                                                                              | ORFs of unknown function (unique)        | 8.994  | 9.576  | 10.686 | 9.059  | 1.22E-01 | 1.19E-01 | 0.58  | -1.63 |
| <i>lpg1102</i> | ORF                                                                              | ORFs of unknown function (unique)        | 8.908  | 8.716  | 10.709 | 9.270  | 7.72E-01 | 8.51E-02 | -0.19 | -1.44 |
| <i>lpg1103</i> | hypothetical (esterase)                                                          | Protein fate / hydrolases / secretion    | 10.304 | 9.399  | 9.119  | 9.625  | 4.33E-02 | 4.77E-01 | -0.90 | 0.51  |
| <i>lpg1103</i> | hypothetical (esterase)                                                          | Protein fate / hydrolases / secretion    | 10.059 | 9.759  | 7.755  | 10.187 | 8.07E-01 | 2.75E-01 | -0.30 | 2.43  |
| <i>lpg1104</i> | hypothetical protein                                                             | Unknown / hypothetical proteins          | 9.211  | 10.075 | 9.242  | 9.381  | 1.18E-01 | 7.76E-01 | 0.86  | 0.14  |
| <i>lpg1104</i> | hypothetical protein                                                             | Unknown / hypothetical proteins          | 9.060  | 10.580 | 9.084  | 9.746  | 8.79E-02 | 2.82E-01 | 1.52  | 0.66  |
| <i>lpg1105</i> | peptide methionine sulfoxide reductase                                           | Detoxification / adaptation              | 6.604  | 10.082 | 7.309  | 7.891  | 3.67E-02 | 6.23E-01 | 3.48  | 0.58  |
| <i>lpg1105</i> | peptide methionine sulfoxide reductase                                           | Detoxification / adaptation              | 7.291  | 9.192  | 7.211  | 8.778  | 3.17E-02 | 2.04E-01 | 1.90  | 1.57  |
| <i>lpg1106</i> | ORF                                                                              | ORFs of unknown function (unique)        | 13.856 | 15.080 | 12.643 | 14.298 | 3.03E-03 | 8.18E-07 | 1.22  | 1.65  |
| <i>lpg1106</i> | ORF                                                                              | ORFs of unknown function (unique)        | 13.866 | 15.121 | 12.608 | 14.323 | 1.47E-03 | 4.94E-07 | 1.26  | 1.72  |
| <i>lpg1107</i> | bacterial/Archaeal transporter family protein                                    | Transport and binding                    | 10.762 | 10.294 | 9.374  | 9.739  | 1.72E-01 | 4.89E-01 | -0.47 | 0.36  |
| <i>lpg1107</i> | bacterial/Archaeal transporter family protein                                    | Transport and binding                    | 10.674 | 10.502 | 9.296  | 9.944  | 5.34E-01 | 1.16E-01 | -0.17 | 0.65  |
| <i>lpg1108</i> | putative lipase                                                                  | Protein fate / hydrolases / secretion    | 10.054 | 10.995 | 10.120 | 9.871  | 1.54E-01 | 7.57E-01 | 0.94  | -0.25 |
| <i>lpg1108</i> | putative lipase                                                                  | Protein fate / hydrolases / secretion    | 9.997  | 11.438 | 10.046 | 10.517 | 6.41E-03 | 1.66E-01 | 1.44  | 0.47  |
| <i>lpg1109</i> | ORF                                                                              | ORFs of unknown function (unique)        | 9.678  | 9.991  | 10.331 | 9.961  | 2.84E-01 | 2.67E-01 | 0.31  | -0.37 |
| <i>lpg1109</i> | ORF                                                                              | ORFs of unknown function (unique)        | 9.716  | 9.162  | 9.883  | 10.081 | 2.85E-01 | 7.42E-01 | -0.55 | 0.20  |
| <i>lpg1110</i> | ORF                                                                              | ORFs of unknown function (unique)        | 9.720  | 11.314 | 9.839  | 8.739  | 3.20E-03 | 2.24E-01 | 1.59  | -1.10 |
| <i>lpg1110</i> | ORF                                                                              | ORFs of unknown function (unique)        | 9.951  | 11.500 | 9.882  | 10.176 | 1.57E-02 | 5.95E-01 | 1.55  | 0.29  |
| <i>lpg1111</i> | ORF                                                                              | ORFs of unknown function (unique)        | 13.989 | 15.509 | 15.182 | 13.600 | 3.44E-03 | 5.96E-05 | 1.52  | -1.58 |
| <i>lpg1111</i> | ORF                                                                              | ORFs of unknown function (unique)        | 13.978 | 15.465 | 15.094 | 13.613 | 1.26E-02 | 2.77E-05 | 1.49  | -1.48 |
| <i>lpg1112</i> | small ORF (127aa)                                                                | ORFs of unknown function (unique)        | 9.390  | 10.248 | 12.416 | 8.445  | 2.52E-01 | 1.21E-04 | 0.86  | -3.97 |
| <i>lpg1112</i> | small ORF (127aa)                                                                | ORFs of unknown function (unique)        | 7.841  | 10.730 | 11.842 | 9.467  | 3.80E-02 | 3.59E-02 | 2.89  | -2.37 |
| <i>lpg1113</i> | hypothetical                                                                     | Unknown / hypothetical proteins          | 10.016 | 9.247  | 11.756 | 8.364  | 6.08E-02 | 1.82E-03 | -0.77 | -3.39 |
| <i>lpg1113</i> | hypothetical                                                                     | Unknown / hypothetical proteins          | 10.270 | 9.841  | 11.653 | 10.041 | 2.85E-01 | 2.43E-04 | -0.43 | -1.61 |
| <i>lpg1114</i> | sensory box protein (GGDEF domain/EAL domain)                                    | Signal transduction / other regulatory f | 8.632  | 9.371  | 11.017 | 8.417  | 4.34E-01 | 8.20E-02 | 0.74  | -2.60 |
| <i>lpg1114</i> | sensory box protein (GGDEF domain/EAL domain)                                    | Signal transduction / other regulatory f | 8.947  | 8.766  | 10.772 | 8.291  | 8.62E-01 | 9.52E-02 | -0.18 | -2.48 |
| <i>lpg1115</i> | DNA integration/recombination/inversion protein (circadia <i>kaiC2</i> )         | Replication and Repair                   | 8.938  | 10.676 | 11.875 | 8.766  | 2.24E-02 | 2.96E-03 | 1.74  | -3.11 |
| <i>lpg1115</i> | DNA integration/recombination/inversion protein (circadia <i>kaiC2</i> )         | Replication and Repair                   | 9.474  | 10.817 | 11.733 | 8.688  | 6.96E-03 | 2.46E-03 | 1.34  | -3.04 |
| <i>lpg1116</i> | chitinase (exochitinase) aminosugars metabolism?                                 | Protein fate / hydrolases / secretion    | 12.752 | 15.096 | 13.701 | 12.733 | 2.41E-04 | 1.36E-02 | 2.34  | -0.97 |
| <i>lpg1116</i> | chitinase (exochitinase) aminosugars metabolism?                                 | Protein fate / hydrolases / secretion    | 12.772 | 15.171 | 13.695 | 12.760 | 6.01E-05 | 2.02E-02 | 2.40  | -0.94 |
| <i>lpg1117</i> | small ORF (157aa) transcriptional repressor of sporulatio <i>paiA</i>            | Protein fate / hydrolases / secretion, C | 10.236 | 11.068 | 12.658 | 10.153 | 1.04E-01 | 2.86E-04 | 0.83  | -2.50 |
| <i>lpg1117</i> | small ORF (157aa) transcriptional repressor of sporulatio <i>paiA</i>            | Protein fate / hydrolases / secretion, C | 9.956  | 11.726 | 12.467 | 10.977 | 5.04E-04 | 5.12E-03 | 1.77  | -1.49 |
| <i>lpg1118</i> | serine-type D-Ala-D-Ala carboxypeptidase (D-alanyl-D-alanine carbo               | Protein fate / hydrolases / secretion    | 9.361  | 10.623 | 10.835 | 8.060  | 7.29E-02 | 9.23E-03 | 1.26  | -2.78 |
| <i>lpg1118</i> | serine-type D-Ala-D-Ala carboxypeptidase (D-alanyl-D-alanine carbo               | Protein fate / hydrolases / secretion    | 8.917  | 10.405 | 11.570 | 9.122  | 4.55E-02 | 6.04E-04 | 1.49  | -2.45 |
| <i>lpg1119</i> | major acid phosphatase (L. pneumophila) <i>AcpH-1</i>                            | Named proteins of general function       | 12.301 | 11.858 | 12.259 | 11.769 | 7.36E-01 | 4.83E-01 | -0.44 | -0.49 |
| <i>lpg1119</i> | major acid phosphatase (L. pneumophila) <i>AcpH-1</i>                            | Named proteins of general function       | 12.385 | 12.991 | 12.366 | 12.239 | 4.84E-02 | 6.63E-01 | 0.61  | -0.13 |
| <i>lpg1120</i> | hypothetical protein                                                             | Unknown / hypothetical proteins          | 9.479  | 8.938  | 7.443  | 10.483 | 4.73E-01 | 1.22E-03 | -0.54 | 3.04  |
| <i>lpg1120</i> | hypothetical protein                                                             | Unknown / hypothetical proteins          | 8.095  | 9.501  | 7.574  | 10.615 | 2.06E-02 | 1.51E-03 | 1.41  | 3.04  |
| <i>lpg1121</i> | ORF                                                                              | ORFs of unknown function (unique)        | 10.532 | 9.737  | 10.791 | 9.804  | 1.00E-01 | 1.02E-01 | -0.80 | -0.99 |
| <i>lpg1121</i> | ORF                                                                              | ORFs of unknown function (unique)        | 10.488 | 9.564  | 10.998 | 10.306 | 8.23E-02 | 8.51E-02 | -0.92 | -0.69 |
| <i>lpg1122</i> | membrane bound lytic murein transglycosylase D                                   | Metabolism of Complex Carbohydrate:      | 8.604  | 8.581  | 9.294  | 8.655  | 9.59E-01 | 2.25E-01 | -0.02 | -0.64 |
| <i>lpg1122</i> | membrane bound lytic murein transglycosylase D                                   | Metabolism of Complex Carbohydrate:      | 8.629  | 8.240  | 9.112  | 8.523  | 7.09E-01 | 3.60E-01 | -0.39 | -0.59 |
| <i>lpg1123</i> | Peb1 (arginine binding periplasmic protein (amino acid A <i>artJ</i> )           | Transport and binding                    | 9.670  | 10.315 | 11.551 | 10.013 | 4.45E-01 | 3.88E-02 | 0.65  | -1.54 |
| <i>lpg1123</i> | Peb1 (arginine binding periplasmic protein (amino acid A <i>artJ</i> )           | Transport and binding                    | 9.712  | 10.209 | 11.106 | 9.790  | 5.53E-01 | 2.08E-01 | 0.50  | -1.32 |
| <i>lpg1124</i> | ORF                                                                              | ORFs of unknown function (unique)        | 9.391  | 9.108  | 9.920  | 5.875  | 8.19E-01 | 3.97E-02 | -0.28 | -4.05 |
| <i>lpg1124</i> | ORF                                                                              | ORFs of unknown function (unique)        | 9.479  | 9.900  | 9.731  | 8.429  | 3.53E-01 | 7.84E-02 | 0.42  | -1.30 |
| <i>lpg1125</i> | cystine/glutamine-binding periplasmic protein (glutamine ABC transp              | Transport and binding                    | 13.990 | 11.745 | 12.336 | 12.838 | 5.26E-03 | 4.57E-01 | -2.25 | 0.50  |
| <i>lpg1125</i> | cystine/glutamine-binding periplasmic protein (glutamine ABC transp              | Transport and binding                    | 13.794 | 11.834 | 12.283 | 12.876 | 6.40E-03 | 3.69E-01 | -1.96 | 0.59  |
| <i>lpg1126</i> | calcium-transporting ATPase                                                      | Transport and binding                    | 11.282 | 11.382 | 11.555 | 9.584  | 8.46E-01 | 1.97E-03 | 0.10  | -1.97 |
| <i>lpg1126</i> | calcium-transporting ATPase                                                      | Transport and binding                    | 11.504 | 11.633 | 11.560 | 9.714  | 7.25E-01 | 6.16E-03 | 0.13  | -1.85 |
| <i>lpg1127</i> | acyl CoA synthetase, long chain fatty acid:CoA ligase (feruloyl CoA sy           | Lipid Metabolism                         | 10.250 | 8.572  | 12.851 | 8.646  | 6.12E-02 | 2.35E-04 | -1.68 | -4.20 |
| <i>lpg1127</i> | acyl CoA synthetase, long chain fatty acid:CoA ligase (feruloyl CoA sy           | Lipid Metabolism                         | 10.390 | 9.434  | 12.912 | 9.350  | 1.22E-01 | 2.16E-04 | -0.96 | -3.56 |
| <i>lpg1128</i> | cytidine/deoxycytidylate deaminase                                               | Nucleotide Metabolism                    | 9.941  | 9.910  | 10.808 | 9.753  | 9.25E-01 | 3.89E-02 | -0.03 | -1.06 |
| <i>lpg1128</i> | cytidine/deoxycytidylate deaminase                                               | Nucleotide Metabolism                    | 10.151 | 10.252 | 10.837 | 10.121 | 7.60E-01 | 8.48E-02 | 0.10  | -0.72 |
| <i>lpg1129</i> | ORF                                                                              | ORFs of unknown function (unique)        | 8.658  | 8.966  | 9.083  | 8.282  | 7.91E-01 | 6.06E-01 | 0.31  | -0.80 |
| <i>lpg1129</i> | ORF                                                                              | ORFs of unknown function (unique)        | 8.784  | 8.084  | 9.438  | 9.160  | 6.20E-02 | 5.00E-01 | -0.70 | -0.28 |
| <i>lpg1130</i> | adenylate cyclase (adenylate cyclase/guanylate cyclase <sup>1</sup> <i>cyaA4</i> | Nucleotide Metabolism                    | 10.801 | 11.158 | 11.326 | 10.511 | 5.55E-01 | 1.09E-01 | 0.36  | -0.82 |
| <i>lpg1130</i> | adenylate cyclase (adenylate cyclase/guanylate cyclase <sup>1</sup> <i>cyaA4</i> | Nucleotide Metabolism                    | 10.869 | 11.043 | 11.321 | 10.908 | 7.47E-01 | 1.83E-01 | 0.17  | -0.41 |
| <i>lpg1131</i> | cyclopropane fatty acid synthase (cyclopropane fatty acy <i>cfa</i>              | Lipid Metabolism, Metabolism of Com      | 10.740 | 10.770 | 12.458 | 10.401 | 9.59E-01 | 1.44E-04 | 0.03  | -2.06 |
| <i>lpg1131</i> | cyclopropane fatty acid synthase (cyclopropane fatty acy <i>cfa</i>              | Lipid Metabolism, Metabolism of Com      | 10.719 | 10.502 | 12.333 | 10.361 | 7.63E-01 | 2.06E-04 | -0.22 | -1.97 |

|                |                                                                       |                                           |        |        |        |        |          |          |       |       |
|----------------|-----------------------------------------------------------------------|-------------------------------------------|--------|--------|--------|--------|----------|----------|-------|-------|
| <i>lpg1132</i> | small ORF (126aa)                                                     | ORFs of unknown function (unique)         | 9.007  | 9.917  | 10.680 | 7.968  | 4.05E-01 | 1.90E-02 | 0.91  | -2.71 |
| <i>lpg1132</i> | small ORF (126aa)                                                     | ORFs of unknown function (unique)         | 9.394  | 9.873  | 10.467 | 9.451  | 6.84E-01 | 4.01E-01 | 0.48  | -1.02 |
| <i>lpg1133</i> | small ORF (59aa)?                                                     | ORFs of unknown function (unique)         | 9.583  | 9.170  | 9.594  | 9.865  | 2.87E-01 | 4.81E-01 | -0.41 | 0.27  |
| <i>lpg1133</i> | small ORF (59aa)?                                                     | ORFs of unknown function (unique)         | 9.250  | 9.820  | 8.605  | 10.471 | 3.55E-01 | 2.53E-03 | 0.57  | 1.87  |
| <i>lpg1134</i> | nitropropane dioxygenase/(trans-enoyl-CoA reductase)                  | Named proteins of general function        | 10.297 | 10.414 | 12.798 | 9.833  | 8.81E-01 | 2.21E-03 | 0.12  | -2.97 |
| <i>lpg1134</i> | nitropropane dioxygenase/(trans-enoyl-CoA reductase)                  | Named proteins of general function        | 10.424 | 11.136 | 12.891 | 10.235 | 4.51E-01 | 5.27E-03 | 0.71  | -2.66 |
| <i>lpg1135</i> | bacterial regulatory proteins, TetR family                            | Transcription factors / DNA binding prc   | 8.753  | 9.483  | 12.350 | 9.077  | 4.88E-01 | 1.02E-02 | 0.73  | -3.27 |
| <i>lpg1135</i> | bacterial regulatory proteins, TetR family                            | Transcription factors / DNA binding prc   | 8.669  | 9.797  | 12.386 | 9.147  | 3.07E-01 | 1.10E-02 | 1.13  | -3.24 |
| <i>lpg1136</i> | hypothetical (lipoprotein)                                            | Named proteins of general function        | 9.646  | 10.684 | 10.672 | 9.834  | 9.35E-02 | 4.66E-02 | 1.04  | -0.84 |
| <i>lpg1136</i> | hypothetical (lipoprotein)                                            | Named proteins of general function        | 9.480  | 10.373 | 10.432 | 9.925  | 1.37E-01 | 2.84E-01 | 0.89  | -0.51 |
| <i>lpg1137</i> | ORF                                                                   | ORFs of unknown function (unique)         | 10.394 | 10.773 | 10.791 | 11.383 | 3.25E-01 | 9.23E-02 | 0.38  | 0.59  |
| <i>lpg1137</i> | ORF                                                                   | ORFs of unknown function (unique)         | 9.994  | 10.901 | 10.815 | 11.455 | 1.02E-02 | 4.58E-02 | 0.91  | 0.64  |
| <i>lpg1138</i> | spermidine/putrescine-binding periplasmic protein PotD                | Transport and binding                     | 11.791 | 9.025  | 11.333 | 10.509 | 3.87E-04 | 6.14E-02 | -2.77 | -0.82 |
| <i>lpg1138</i> | spermidine/putrescine-binding periplasmic protein PotD                | Transport and binding                     | 11.843 | 8.697  | 11.243 | 10.497 | 2.63E-03 | 7.46E-02 | -3.15 | -0.75 |
| <i>lpg1139</i> | spermidine/putrescine ABC transporter permease protein <i>potC</i>    | Transport and binding                     | 9.513  | 9.783  | 9.710  | 9.822  | 7.35E-01 | 8.76E-01 | 0.27  | 0.11  |
| <i>lpg1139</i> | spermidine/putrescine ABC transporter permease protein <i>potC</i>    | Transport and binding                     | 9.688  | 9.919  | 9.160  | 9.876  | 7.74E-01 | 7.32E-02 | 0.23  | 0.72  |
| <i>lpg1140</i> | spermidine/putrescine ABC transporter permease protein <i>potB</i>    | Transport and binding                     | 10.845 | 10.913 | 10.617 | 10.921 | 9.08E-01 | 5.82E-01 | 0.07  | 0.30  |
| <i>lpg1140</i> | spermidine/putrescine ABC transporter permease protein <i>potB</i>    | Transport and binding                     | 10.879 | 10.651 | 10.282 | 10.841 | 6.56E-01 | 2.60E-01 | -0.23 | 0.56  |
| <i>lpg1141</i> | spermidine/putrescine ABC transporter, ATP-binding protein PotA       | Transport and binding                     | 10.035 | 4.586  | 8.169  | 8.570  | 4.16E-06 | 6.47E-01 | -5.45 | 0.40  |
| <i>lpg1141</i> | spermidine/putrescine ABC transporter, ATP-binding protein PotA       | Transport and binding                     | 10.041 | 6.790  | 8.467  | 9.720  | 2.90E-02 | 1.75E-01 | -3.25 | 1.25  |
| <i>lpg1142</i> | ORF Hypothetical COG2827                                              | Unknown / hypothetical proteins           | 10.261 | 9.434  | 10.167 | 9.932  | 9.01E-02 | 6.80E-01 | -0.83 | -0.23 |
| <i>lpg1142</i> | ORF Hypothetical COG2827                                              | Unknown / hypothetical proteins           | 10.072 | 9.742  | 9.958  | 9.989  | 4.29E-01 | 9.52E-01 | -0.33 | 0.03  |
| <i>lpg1143</i> | short chain type dehydrogenase/reductase (retinol dehydrogenase)      | Lipid Metabolism                          | 8.362  | 7.192  | 11.214 | 6.669  | 3.17E-01 | 1.72E-03 | -1.17 | -4.54 |
| <i>lpg1143</i> | short chain type dehydrogenase/reductase (retinol dehydrogenase)      | Lipid Metabolism                          | 8.382  | 7.058  | 11.141 | 7.806  | 1.47E-01 | 6.89E-03 | -1.32 | -3.34 |
| <i>lpg1144</i> | ORF <i>cegC3</i>                                                      | ORFs of unknown function (unique)         | 9.375  | 10.924 | 11.254 | 10.901 | 2.77E-03 | 3.67E-01 | 1.55  | -0.35 |
| <i>lpg1144</i> | ORF <i>cegC3</i>                                                      | ORFs of unknown function (unique)         | 9.034  | 11.104 | 10.473 | 10.579 | 6.41E-04 | 7.94E-01 | 2.07  | 0.11  |
| <i>lpg1145</i> | ORF                                                                   | ORFs of unknown function (unique)         | 10.206 | 10.748 | 13.292 | 8.967  | 6.45E-01 | 1.58E-03 | 0.54  | -4.32 |
| <i>lpg1145</i> | ORF                                                                   | ORFs of unknown function (unique)         | 10.361 | 11.551 | 13.303 | 9.571  | 3.34E-01 | 3.07E-03 | 1.19  | -3.73 |
| <i>lpg1146</i> | thermostable carboxypeptidase 1                                       | DNA/RNA degradation / restriction         | 10.385 | 10.489 | 11.057 | 10.016 | 8.45E-01 | 1.49E-01 | 0.10  | -1.04 |
| <i>lpg1146</i> | thermostable carboxypeptidase 1                                       | DNA/RNA degradation / restriction         | 10.155 | 9.852  | 10.708 | 9.811  | 3.64E-01 | 1.50E-01 | -0.30 | -0.90 |
| <i>lpg1147</i> | acetyltransferase? streptothricin acetyltransferase                   | Named proteins of general function        | 12.210 | 11.765 | 13.428 | 11.470 | 2.60E-01 | 1.02E-03 | -0.44 | -1.96 |
| <i>lpg1147</i> | acetyltransferase? streptothricin acetyltransferase                   | Named proteins of general function        | 12.177 | 11.721 | 13.354 | 11.619 | 2.21E-01 | 1.49E-03 | -0.46 | -1.74 |
| <i>lpg1148</i> | ORF                                                                   | ORFs of unknown function (unique)         | 10.464 | 11.615 | 12.108 | 9.800  | 3.53E-03 | 3.78E-04 | 1.15  | -2.31 |
| <i>lpg1148</i> | ORF                                                                   | ORFs of unknown function (unique)         | 10.468 | 11.829 | 12.093 | 10.004 | 3.68E-03 | 7.94E-04 | 1.36  | -2.09 |
| <i>lpg1149</i> | ORF                                                                   | ORFs of unknown function (unique)         | 10.833 | 9.994  | 10.570 | 10.111 | 3.76E-01 | 5.49E-01 | -0.84 | -0.46 |
| <i>lpg1149</i> | ORF                                                                   | ORFs of unknown function (unique)         | 10.963 | 9.482  | 9.567  | 9.736  | 2.58E-03 | 7.23E-01 | -1.48 | 0.17  |
| <i>lpg1150</i> | transcription regulator protein (methylated DNA protein cysteine meth | Detoxification / adaptation, Transcriptic | 8.562  | 8.866  | 9.752  | 8.519  | 7.56E-01 | 2.78E-02 | 0.30  | -1.23 |
| <i>lpg1150</i> | transcription regulator protein (methylated DNA protein cysteine meth | Detoxification / adaptation, Transcriptic | 8.599  | 9.517  | 9.500  | 9.646  | 1.98E-01 | 8.32E-01 | 0.92  | 0.15  |
| <i>lpg1151</i> | ORF                                                                   | ORFs of unknown function (unique)         | 9.533  | 8.261  | 11.060 | 8.588  | 2.20E-01 | 1.19E-03 | -1.27 | -2.47 |
| <i>lpg1151</i> | ORF                                                                   | ORFs of unknown function (unique)         | 9.500  | 9.915  | 11.081 | 8.666  | 5.10E-01 | 1.65E-03 | 0.41  | -2.41 |
| <i>lpg1152</i> | ORF                                                                   | ORFs of unknown function (unique)         | 9.741  | 11.246 | 9.714  | 11.667 | 5.98E-03 | 9.66E-02 | 1.50  | 1.95  |
| <i>lpg1152</i> | ORF                                                                   | ORFs of unknown function (unique)         | 9.700  | 11.258 | 8.836  | 10.928 | 7.22E-02 | 2.18E-01 | 1.56  | 2.09  |
| <i>lpg1153</i> | amine oxidase                                                         | Amino Acid Metabolism, Biosynthesis       | 9.915  | 9.372  | 8.922  | 8.513  | 1.32E-01 | 5.44E-01 | -0.54 | -0.41 |
| <i>lpg1153</i> | amine oxidase                                                         | Amino Acid Metabolism, Biosynthesis       | 9.145  | 8.784  | 8.576  | 8.496  | 5.29E-02 | 8.81E-01 | -0.36 | -0.08 |
| <i>lpg1154</i> | ORF                                                                   | ORFs of unknown function (unique)         | 11.163 | 12.454 | 13.788 | 8.446  | 1.07E-01 | 4.50E-05 | 1.29  | -5.34 |
| <i>lpg1154</i> | ORF                                                                   | ORFs of unknown function (unique)         | 11.221 | 12.871 | 13.826 | 9.182  | 4.62E-02 | 3.61E-04 | 1.65  | -4.64 |
| <i>lpg1155</i> | pyruvate decarboxylase                                                | Carbohydrate Metabolism                   | 10.597 | 10.114 | 12.151 | 10.231 | 5.27E-01 | 3.30E-02 | -0.48 | -1.92 |
| <i>lpg1155</i> | pyruvate decarboxylase                                                | Carbohydrate Metabolism                   | 10.633 | 10.665 | 12.242 | 10.339 | 9.56E-01 | 1.79E-02 | 0.03  | -1.90 |
| <i>lpg1156</i> | aminopeptidase (leucine aminopeptidase)                               | Protein fate / hydrolases / secretion     | 10.763 | 11.974 | 12.272 | 12.180 | 1.62E-02 | 7.92E-01 | 1.21  | -0.09 |
| <i>lpg1156</i> | aminopeptidase (leucine aminopeptidase)                               | Protein fate / hydrolases / secretion     | 10.904 | 12.178 | 12.470 | 12.383 | 1.49E-02 | 7.92E-01 | 1.27  | -0.09 |
| <i>lpg1157</i> | lipase B (conserved hypothetical protein-putative ATP/GTP-binding pr  | Protein fate / hydrolases / secretion, S  | 8.900  | 6.361  | 7.290  | 4.838  | 8.53E-04 | 2.27E-01 | -2.54 | -2.45 |
| <i>lpg1157</i> | lipase B (conserved hypothetical protein-putative ATP/GTP-binding pr  | Protein fate / hydrolases / secretion, S  | 8.883  | 7.849  | 7.294  | 7.076  | 2.87E-01 | 8.68E-01 | -1.03 | -0.22 |
| <i>lpg1158</i> | ORF                                                                   | ORFs of unknown function (unique)         | 8.694  | 8.105  | 11.328 | 8.029  | 4.43E-01 | 7.14E-03 | -0.59 | -3.30 |
| <i>lpg1158</i> | ORF                                                                   | ORFs of unknown function (unique)         | 8.668  | 9.170  | 11.686 | 8.844  | 6.04E-01 | 5.24E-03 | 0.50  | -2.84 |
| <i>lpg1159</i> | hypothetical (transporter?)                                           | Unknown / hypothetical proteins           | 9.714  | 10.303 | 10.735 | 9.583  | 4.91E-01 | 8.06E-02 | 0.59  | -1.15 |
| <i>lpg1159</i> | hypothetical (transporter?)                                           | Unknown / hypothetical proteins           | 9.623  | 10.378 | 10.557 | 9.669  | 4.30E-01 | 2.84E-01 | 0.76  | -0.89 |
| <i>lpg1160</i> | ORF                                                                   | ORFs of unknown function (unique)         | 10.541 | 12.242 | 13.945 | 10.518 | 1.20E-06 | 2.84E-02 | 1.70  | -3.43 |
| <i>lpg1160</i> | ORF                                                                   | ORFs of unknown function (unique)         | 10.571 | 12.237 | 13.860 | 10.632 | 7.46E-06 | 3.80E-02 | 1.67  | -3.23 |
| <i>lpg1161</i> | phosphoribosyltransferase                                             | Nucleotide Metabolism                     | 10.385 | 9.513  | 12.427 | 9.199  | 1.32E-01 | 1.43E-03 | -0.87 | -3.23 |
| <i>lpg1161</i> | phosphoribosyltransferase                                             | Nucleotide Metabolism                     | 10.394 | 9.360  | 12.448 | 9.666  | 7.08E-02 | 4.81E-03 | -1.03 | -2.78 |
| <i>lpg1162</i> | ompA-like transmembrane domain protein                                | Named proteins of general function        | 13.120 | 13.200 | 10.971 | 12.789 | 8.91E-01 | 7.43E-03 | 0.08  | 1.82  |
| <i>lpg1162</i> | ompA-like transmembrane domain protein                                | Named proteins of general function        | 13.240 | 13.102 | 10.946 | 12.810 | 8.27E-01 | 6.37E-03 | -0.14 | 1.86  |
| <i>lpg1163</i> | MFS transporter (sugar transporter transmembrane protein) (citrate-p  | Transport and binding                     | 10.163 | 8.732  | 9.136  | 8.605  | 5.63E-02 | 5.73E-01 | -1.43 | -0.53 |
| <i>lpg1163</i> | MFS transporter (sugar transporter transmembrane protein) (citrate-p  | Transport and binding                     | 10.279 | 9.022  | 8.924  | 9.400  | 3.00E-03 | 5.24E-01 | -1.26 | 0.48  |

|                |                                                                             |             |                                          |        |        |        |        |          |          |       |       |
|----------------|-----------------------------------------------------------------------------|-------------|------------------------------------------|--------|--------|--------|--------|----------|----------|-------|-------|
| <i>lpg1164</i> | acetylornithine deacetylase (acetylornithinase)                             | <i>argE</i> | Amino Acid Metabolism                    | 10.515 | 9.379  | 9.700  | 10.493 | 6.55E-03 | 2.30E-02 | -1.14 | 0.79  |
| <i>lpg1164</i> | acetylornithine deacetylase (acetylornithinase)                             | <i>argE</i> | Amino Acid Metabolism                    | 10.429 | 9.880  | 9.505  | 10.871 | 1.57E-01 | 3.84E-03 | -0.55 | 1.37  |
| <i>lpg1165</i> | uridine kinase                                                              | <i>udk</i>  | Nucleotide Metabolism                    | 11.071 | 11.691 | 9.467  | 10.736 | 2.40E-01 | 4.05E-02 | 0.62  | 1.27  |
| <i>lpg1165</i> | uridine kinase                                                              | <i>udk</i>  | Nucleotide Metabolism                    | 11.045 | 11.178 | 9.199  | 10.729 | 8.24E-01 | 1.73E-02 | 0.13  | 1.53  |
| <i>lpg1166</i> | hypothetical protein                                                        |             | Unknown / hypothetical proteins          | 6.211  | 6.670  | 7.222  | 6.842  | 7.85E-01 | 9.03E-01 | 0.46  | -0.38 |
| <i>lpg1166</i> | hypothetical protein                                                        |             | Unknown / hypothetical proteins          | 6.019  | 6.310  | 4.275  | 6.266  | 9.35E-01 | 3.55E-01 | 0.29  | 1.99  |
| <i>lpg1167</i> | hypothetical (cytoplasmic protein)                                          |             | Named proteins of general function       | 12.102 | 10.097 | 9.461  | 9.976  | 1.06E-03 | 6.17E-01 | -2.00 | 0.52  |
| <i>lpg1167</i> | hypothetical (cytoplasmic protein)                                          |             | Named proteins of general function       | 12.449 | 9.961  | 8.480  | 9.712  | 3.33E-05 | 2.58E-01 | -2.49 | 1.23  |
| <i>lpg1168</i> | sensory box protein (GGDEF domain/EAL domain)                               |             | Signal transduction / other regulatory f | 9.445  | 9.272  | 10.793 | 9.516  | 8.91E-01 | 3.25E-01 | -0.17 | -1.28 |
| <i>lpg1168</i> | sensory box protein (GGDEF domain/EAL domain)                               |             | Signal transduction / other regulatory f | 9.457  | 9.778  | 10.821 | 9.561  | 7.69E-01 | 3.32E-01 | 0.32  | -1.26 |
| <i>lpg1169</i> | hypothetical (dioxigenase)                                                  |             | Named proteins of general function       | 8.308  | 10.484 | 11.854 | 10.560 | 7.84E-02 | 1.81E-01 | 2.18  | -1.29 |
| <i>lpg1169</i> | hypothetical (dioxigenase)                                                  |             | Named proteins of general function       | 8.685  | 10.808 | 11.786 | 11.125 | 3.02E-02 | 3.01E-01 | 2.12  | -0.66 |
| <i>lpg1170</i> | pyruvate formate lyase-activating enzyme PflA                               |             | Chemotaxis / motility / cell division    | 8.691  | 10.208 | 10.075 | 9.191  | 2.41E-02 | 4.89E-01 | 1.52  | -0.88 |
| <i>lpg1170</i> | pyruvate formate lyase-activating enzyme PflA                               |             | Chemotaxis / motility / cell division    | 9.224  | 10.635 | 10.552 | 10.672 | 1.73E-01 | 8.97E-01 | 1.41  | 0.12  |
| <i>lpg1171</i> | small ORF (139aa)                                                           |             | ORFs of unknown function (unique)        | 9.150  | 8.904  | 9.877  | 9.711  | 5.45E-01 | 6.29E-01 | -0.25 | -0.17 |
| <i>lpg1171</i> | small ORF (139aa)                                                           |             | ORFs of unknown function (unique)        | 9.063  | 9.297  | 10.053 | 10.000 | 7.79E-01 | 8.93E-01 | 0.23  | -0.05 |
| <i>lpg1172</i> | TPR repeat protein (enhanced entry protein EnhC)                            |             | Toxin production / other pathogen func   | 10.299 | 10.156 | 11.375 | 9.909  | 7.67E-01 | 7.62E-03 | -0.14 | -1.47 |
| <i>lpg1172</i> | TPR repeat protein (enhanced entry protein EnhC)                            |             | Toxin production / other pathogen func   | 9.895  | 10.106 | 11.226 | 9.929  | 3.86E-01 | 1.44E-02 | 0.21  | -1.30 |
| <i>lpg1173</i> | sensor protein PilS (pilin transcriptional activator) (sensoi <i>pilS</i> ) |             | Protein fate / hydrolases / secretion, S | 11.290 | 10.677 | 11.537 | 10.060 | 1.76E-02 | 1.03E-04 | -0.61 | -1.48 |
| <i>lpg1173</i> | sensor protein PilS (pilin transcriptional activator) (sensoi <i>pilS</i> ) |             | Protein fate / hydrolases / secretion, S | 11.344 | 10.564 | 11.549 | 10.279 | 9.67E-04 | 2.00E-03 | -0.78 | -1.27 |
| <i>lpg1174</i> | two component response regulator PilR (type 4 fimbriae <i>pilR</i> )        |             | Protein fate / hydrolases / secretion, S | 9.809  | 9.890  | 11.026 | 10.023 | 8.65E-01 | 2.71E-02 | 0.08  | -1.00 |
| <i>lpg1174</i> | two component response regulator PilR (type 4 fimbriae <i>pilR</i> )        |             | Protein fate / hydrolases / secretion, S | 10.079 | 10.111 | 10.951 | 10.079 | 9.17E-01 | 3.38E-02 | 0.03  | -0.87 |
| <i>lpg1175</i> | hydrolase (alpha/beta fold family) (aromatic hydrocarbon catabolism)        |             | Protein fate / hydrolases / secretion    | 9.769  | 10.845 | 10.413 | 10.347 | 4.68E-05 | 8.30E-01 | 1.08  | -0.07 |
| <i>lpg1175</i> | hydrolase (alpha/beta fold family) (aromatic hydrocarbon catabolism)        |             | Protein fate / hydrolases / secretion    | 9.769  | 10.697 | 10.309 | 10.348 | 9.09E-04 | 8.95E-01 | 0.93  | 0.04  |
| <i>lpg1176</i> | Zn-dependent protease (zinc metalloprotease)                                |             | Protein fate / hydrolases / secretion    | 7.524  | 9.133  | 8.549  | 8.875  | 6.10E-02 | 4.93E-01 | 1.61  | 0.33  |
| <i>lpg1176</i> | Zn-dependent protease (zinc metalloprotease)                                |             | Protein fate / hydrolases / secretion    | 8.226  | 9.705  | 8.251  | 9.268  | 1.64E-02 | 1.42E-01 | 1.48  | 1.02  |
| <i>lpg1177</i> | riboflavin biosynthesis protein RibD                                        | <i>ribD</i> | Metabolism of Cofactors and Vitamins     | 8.303  | 10.257 | 8.288  | 10.119 | 8.06E-02 | 1.41E-01 | 1.95  | 1.83  |
| <i>lpg1177</i> | riboflavin biosynthesis protein RibD                                        | <i>ribD</i> | Metabolism of Cofactors and Vitamins     | 9.259  | 10.629 | 6.697  | 10.293 | 2.01E-03 | 4.96E-03 | 1.37  | 3.60  |
| <i>lpg1178</i> | riboflavin synthase, alpha subunit RibE                                     | <i>ribE</i> | Metabolism of Cofactors and Vitamins     | 11.523 | 11.719 | 10.932 | 11.468 | 5.33E-01 | 7.14E-02 | 0.20  | 0.54  |
| <i>lpg1178</i> | riboflavin synthase, alpha subunit RibE                                     | <i>ribE</i> | Metabolism of Cofactors and Vitamins     | 11.577 | 11.852 | 10.780 | 11.490 | 2.42E-01 | 4.95E-02 | 0.27  | 0.71  |
| <i>lpg1179</i> | riboflavin biosynthesis protein RibA (GTP cyclohydrolase                    | <i>ribA</i> | Metabolism of Cofactors and Vitamins     | 10.671 | 11.877 | 10.492 | 11.655 | 5.02E-03 | 6.07E-03 | 1.21  | 1.16  |
| <i>lpg1179</i> | riboflavin biosynthesis protein RibA (GTP cyclohydrolase                    | <i>ribA</i> | Metabolism of Cofactors and Vitamins     | 10.836 | 12.090 | 10.470 | 11.851 | 1.02E-02 | 1.54E-03 | 1.25  | 1.38  |
| <i>lpg1180</i> | riboflavin synthase, beta subunit RibB (6,7-dimethyl-8-rib                  | <i>ribH</i> | Metabolism of Cofactors and Vitamins     | 11.964 | 11.061 | 11.899 | 11.116 | 2.98E-02 | 1.52E-03 | -0.90 | -0.78 |
| <i>lpg1180</i> | riboflavin synthase, beta subunit RibB (6,7-dimethyl-8-rib                  | <i>ribH</i> | Metabolism of Cofactors and Vitamins     | 12.008 | 11.287 | 11.756 | 11.223 | 2.16E-02 | 1.70E-02 | -0.72 | -0.53 |
| <i>lpg1181</i> | CTP synthase PyrG                                                           | <i>pyrG</i> | Nucleotide Metabolism                    | 12.191 | 12.885 | 11.820 | 12.542 | 3.40E-01 | 3.58E-01 | 0.69  | 0.72  |
| <i>lpg1181</i> | CTP synthase PyrG                                                           | <i>pyrG</i> | Nucleotide Metabolism                    | 12.202 | 12.896 | 11.834 | 12.578 | 3.43E-01 | 3.18E-01 | 0.69  | 0.74  |
| <i>lpg1182</i> | 2-dehydro-3-deoxyphosphonoacetate aldolase                                  | <i>kdsA</i> | Metabolism of Complex Carbohydrate:      | 10.472 | 11.405 | 10.007 | 11.067 | 1.18E-01 | 6.70E-02 | 0.93  | 1.06  |
| <i>lpg1182</i> | 2-dehydro-3-deoxyphosphonoacetate aldolase                                  | <i>kdsA</i> | Metabolism of Complex Carbohydrate:      | 10.360 | 11.466 | 9.769  | 10.898 | 1.04E-01 | 2.30E-02 | 1.11  | 1.13  |
| <i>lpg1183</i> | ORF                                                                         |             | Unknown / hypothetical proteins          | 9.061  | 10.812 | 10.498 | 8.210  | 7.01E-06 | 2.83E-03 | 1.75  | -2.29 |
| <i>lpg1183</i> | ORF                                                                         |             | Unknown / hypothetical proteins          | 8.927  | 10.054 | 10.049 | 8.622  | 6.54E-02 | 2.31E-02 | 1.13  | -1.43 |
| <i>lpg1184</i> | outer membrane protein RomA                                                 |             | Named proteins of general function       | 9.342  | 9.955  | 10.421 | 8.964  | 1.04E-01 | 1.90E-03 | 0.61  | -1.46 |
| <i>lpg1184</i> | outer membrane protein RomA                                                 |             | Named proteins of general function       | 9.490  | 9.474  | 10.117 | 8.863  | 9.87E-01 | 1.36E-02 | -0.02 | -1.25 |
| <i>lpg1185</i> | tRNA-Ser                                                                    |             | tRNA                                     | 11.764 | 10.659 | 11.633 | 11.485 | 1.32E-03 | 6.20E-01 | -1.11 | -0.15 |
| <i>lpg1185</i> | tRNA-Ser                                                                    |             | tRNA                                     | 11.660 | 10.301 | 11.555 | 11.465 | 1.34E-02 | 7.98E-01 | -1.36 | -0.09 |
| <i>lpg1186</i> | competence lipoprotein ComL                                                 |             | Transport and binding                    | 10.997 | 10.940 | 9.850  | 11.594 | 9.53E-01 | 2.76E-02 | -0.06 | 1.74  |
| <i>lpg1186</i> | competence lipoprotein ComL                                                 |             | Transport and binding                    | 10.869 | 11.985 | 9.985  | 12.353 | 2.35E-02 | 5.76E-04 | 1.12  | 2.37  |
| <i>lpg1187</i> | exonuclease involved in removal of stalled replication fori <i>rdgC</i>     |             | Replication and Repair                   | 11.245 | 10.858 | 10.542 | 11.396 | 6.14E-01 | 1.38E-01 | -0.39 | 0.85  |
| <i>lpg1187</i> | exonuclease involved in removal of stalled replication fori <i>rdgC</i>     |             | Replication and Repair                   | 11.152 | 11.432 | 10.443 | 11.896 | 3.95E-01 | 1.18E-03 | 0.28  | 1.45  |
| <i>lpg1188</i> | Kup system potassium uptake protein                                         | <i>kup2</i> | Transport and binding                    | 10.973 | 11.510 | 9.518  | 12.298 | 2.02E-01 | 1.71E-03 | 0.54  | 2.78  |
| <i>lpg1188</i> | Kup system potassium uptake protein                                         | <i>kup2</i> | Transport and binding                    | 11.023 | 11.530 | 9.477  | 12.291 | 2.82E-01 | 1.17E-04 | 0.51  | 2.81  |
| <i>lpg1189</i> | ORF                                                                         |             | ORFs of unknown function (unique)        | 11.686 | 13.366 | 10.818 | 12.292 | 6.70E-05 | 4.80E-04 | 1.68  | 1.47  |
| <i>lpg1189</i> | ORF                                                                         |             | ORFs of unknown function (unique)        | 11.733 | 13.359 | 10.848 | 12.362 | 1.48E-04 | 4.72E-04 | 1.63  | 1.51  |
| <i>lpg1190</i> | SAM-dependent methyltransferase                                             |             | Named proteins of general function       | 9.392  | 9.657  | 9.114  | 9.661  | 4.63E-01 | 7.04E-02 | 0.26  | 0.55  |
| <i>lpg1190</i> | SAM-dependent methyltransferase                                             |             | Named proteins of general function       | 9.515  | 9.913  | 8.810  | 9.775  | 1.66E-01 | 4.32E-02 | 0.40  | 0.96  |
| <i>lpg1191</i> | glycosyl hydrolase family 3 (anhydromuramoyl) peptide exo beta-N-ac         |             | Metabolism of Complex Carbohydrate:      | 9.961  | 9.222  | 9.688  | 8.036  | 1.90E-01 | 1.78E-02 | -0.74 | -1.65 |
| <i>lpg1191</i> | glycosyl hydrolase family 3 (anhydromuramoyl) peptide exo beta-N-ac         |             | Metabolism of Complex Carbohydrate:      | 9.863  | 9.653  | 9.587  | 10.913 | 6.26E-01 | 3.97E-01 | -0.21 | 1.33  |
| <i>lpg1192</i> | ThiJ/PfpI family (transcriptional regulator, AraC family), isonitrile hydr  |             | Transcription factors / DNA binding prc  | 9.327  | 9.491  | 9.972  | 8.889  | 6.48E-01 | 5.63E-02 | 0.16  | -1.08 |
| <i>lpg1192</i> | ThiJ/PfpI family (transcriptional regulator, AraC family), isonitrile hydr  |             | Transcription factors / DNA binding prc  | 9.741  | 9.474  | 10.033 | 9.350  | 3.35E-01 | 7.38E-02 | -0.27 | -0.68 |
| <i>lpg1193</i> | phosphoribosyl-ATP pyrophosphatase/phosphoribosyl A1 <i>hisI</i>            |             | Amino Acid Metabolism                    | 11.678 | 12.775 | 10.152 | 12.424 | 7.26E-02 | 8.75E-04 | 1.10  | 2.27  |
| <i>lpg1193</i> | phosphoribosyl-ATP pyrophosphatase/phosphoribosyl A1 <i>hisI</i>            |             | Amino Acid Metabolism                    | 11.828 | 12.771 | 9.970  | 12.407 | 2.98E-02 | 2.16E-03 | 0.94  | 2.44  |
| <i>lpg1194</i> | imidazoleglycerol-phosphate synthase, cyclase subunit HisF                  |             | Amino Acid Metabolism                    | 6.555  | 9.758  | 8.039  | 10.251 | 1.93E-02 | 9.91E-03 | 3.20  | 2.21  |
| <i>lpg1194</i> | imidazoleglycerol-phosphate synthase, cyclase subunit HisF                  |             | Amino Acid Metabolism                    | 6.857  | 9.316  | 7.294  | 9.886  | 8.90E-03 | 1.89E-04 | 2.46  | 2.59  |
| <i>lpg1195</i> | phosphoribosylformimino-5-aminoimidazole carboxamide <i>hisA</i>            |             | Amino Acid Metabolism                    | 9.802  | 10.288 | 10.874 | 10.833 | 2.37E-01 | 9.09E-01 | 0.49  | -0.04 |
| <i>lpg1195</i> | phosphoribosylformimino-5-aminoimidazole carboxamide <i>hisA</i>            |             | Amino Acid Metabolism                    | 9.902  | 10.957 | 10.945 | 11.111 | 1.98E-01 | 7.17E-01 | 1.05  | 0.17  |

|                |                                                                         |               |                                          |        |        |        |        |          |          |       |       |
|----------------|-------------------------------------------------------------------------|---------------|------------------------------------------|--------|--------|--------|--------|----------|----------|-------|-------|
| <i>lpg1196</i> | amidotransferase HisH (glutamine amidotransferase)                      | <i>hisH_2</i> | Amino Acid Metabolism                    | 9.268  | 8.428  | 8.279  | 8.941  | 5.61E-02 | 3.50E-01 | -0.84 | 0.66  |
| <i>lpg1196</i> | amidotransferase HisH (glutamine amidotransferase)                      | <i>hisH_2</i> | Amino Acid Metabolism                    | 9.498  | 8.756  | 7.733  | 9.560  | 7.83E-02 | 7.09E-02 | -0.74 | 1.83  |
| <i>lpg1197</i> | histidinol phosphatase and imidazoleglycerol-phosphate dehydratase      |               | Amino Acid Metabolism                    | 10.394 | 10.628 | 11.277 | 11.099 | 6.25E-01 | 6.89E-01 | 0.23  | -0.18 |
| <i>lpg1197</i> | histidinol phosphatase and imidazoleglycerol-phosphate dehydratase      |               | Amino Acid Metabolism                    | 10.406 | 10.270 | 11.124 | 11.080 | 8.41E-01 | 9.18E-01 | -0.14 | -0.04 |
| <i>lpg1198</i> | histidinol-phosphate aminotransferase                                   | <i>hisC</i>   | Amino Acid Metabolism                    | 9.676  | 9.481  | 9.609  | 9.380  | 7.58E-01 | 8.24E-01 | -0.19 | -0.23 |
| <i>lpg1198</i> | histidinol-phosphate aminotransferase                                   | <i>hisC</i>   | Amino Acid Metabolism                    | 9.925  | 8.717  | 9.441  | 9.735  | 2.37E-03 | 6.80E-01 | -1.21 | 0.29  |
| <i>lpg1199</i> | histidinol dehydrogenase                                                |               | Amino Acid Metabolism                    | 9.567  | 8.621  | 8.390  | 10.289 | 3.55E-02 | 2.20E-04 | -0.95 | 1.90  |
| <i>lpg1199</i> | histidinol dehydrogenase                                                |               | Amino Acid Metabolism                    | 10.173 | 9.537  | 8.163  | 10.308 | 3.02E-01 | 3.61E-02 | -0.64 | 2.15  |
| <i>lpg1200</i> | ATP phosphoribosyltransferase HisG                                      | <i>hisG</i>   | Amino Acid Metabolism                    | 10.203 | 9.251  | 9.098  | 10.384 | 1.70E-01 | 1.68E-01 | -0.95 | 1.29  |
| <i>lpg1200</i> | ATP phosphoribosyltransferase HisG                                      | <i>hisG</i>   | Amino Acid Metabolism                    | 10.238 | 9.477  | 8.804  | 10.782 | 1.14E-01 | 2.93E-02 | -0.76 | 1.98  |
| <i>lpg1201</i> | hypothetical COG4496                                                    |               | Unknown / hypothetical proteins          | 10.266 | 11.892 | 8.463  | 10.297 | 6.24E-03 | 1.95E-03 | 1.63  | 1.83  |
| <i>lpg1201</i> | hypothetical COG4496                                                    |               | Unknown / hypothetical proteins          | 9.786  | 10.417 | 8.124  | 10.097 | 3.93E-01 | 1.05E-01 | 0.63  | 1.97  |
| <i>lpg1202</i> | cytochrome D ubiquinol oxidase, subunit I                               | <i>cydA-2</i> | Energy Metabolism                        | 12.821 | 13.735 | 11.225 | 12.729 | 7.88E-02 | 1.36E-03 | 0.91  | 1.50  |
| <i>lpg1202</i> | cytochrome D ubiquinol oxidase, subunit I                               | <i>cydA-2</i> | Energy Metabolism                        | 12.902 | 13.753 | 10.931 | 12.759 | 4.92E-02 | 1.27E-03 | 0.85  | 1.83  |
| <i>lpg1203</i> | cytochrome D ubiquinol oxidase, subunit II                              | <i>cydB</i>   | Energy Metabolism                        | 13.049 | 13.858 | 12.296 | 12.643 | 2.92E-02 | 7.62E-02 | 0.81  | 0.35  |
| <i>lpg1203</i> | cytochrome D ubiquinol oxidase, subunit II                              | <i>cydB</i>   | Energy Metabolism                        | 13.014 | 13.888 | 12.285 | 12.680 | 3.24E-02 | 4.55E-02 | 0.87  | 0.40  |
| <i>lpg1204</i> | orotate phosphoribosyltransferase                                       | <i>pyrE</i>   | Nucleotide Metabolism                    | 11.357 | 12.394 | 11.292 | 13.301 | 4.26E-03 | 1.47E-04 | 1.04  | 2.01  |
| <i>lpg1204</i> | orotate phosphoribosyltransferase                                       | <i>pyrE</i>   | Nucleotide Metabolism                    | 11.235 | 12.442 | 11.108 | 13.250 | 1.04E-03 | 3.43E-04 | 1.21  | 2.14  |
| <i>lpg1205</i> | cold shock domain family protein CspA                                   |               | Detoxification / adaptation              | 15.024 | 14.235 | 13.128 | 14.393 | 1.33E-01 | 1.23E-02 | -0.79 | 1.27  |
| <i>lpg1205</i> | cold shock domain family protein CspA                                   |               | Detoxification / adaptation              | 15.017 | 14.211 | 13.113 | 14.404 | 1.64E-01 | 1.44E-02 | -0.81 | 1.29  |
| <i>lpg1206</i> | sigma 54 modulation protein YhbH                                        |               | Signal transduction / other regulatory f | 10.871 | 11.512 | 14.524 | 9.485  | 4.18E-01 | 4.28E-04 | 0.64  | -5.04 |
| <i>lpg1206</i> | sigma 54 modulation protein YhbH                                        |               | Signal transduction / other regulatory f | 10.866 | 11.670 | 14.501 | 10.104 | 3.26E-01 | 1.76E-03 | 0.80  | -4.40 |
| <i>lpg1207</i> | conserved hypothetical protein COG2606                                  |               | Unknown / hypothetical proteins          | 10.972 | 10.601 | 14.040 | 9.349  | 5.94E-01 | 1.54E-04 | -0.37 | -4.69 |
| <i>lpg1207</i> | conserved hypothetical protein COG2606                                  |               | Unknown / hypothetical proteins          | 10.971 | 10.694 | 14.044 | 9.575  | 6.62E-01 | 8.40E-04 | -0.28 | -4.47 |
| <i>lpg1208</i> | transcriptional regulator MarR family                                   |               | Transcription factors / DNA binding prc  | 10.295 | 9.862  | 10.953 | 9.880  | 3.26E-01 | 1.00E-02 | -0.43 | -1.07 |
| <i>lpg1208</i> | transcriptional regulator MarR family                                   |               | Transcription factors / DNA binding prc  | 10.371 | 9.436  | 10.822 | 9.850  | 1.59E-01 | 2.42E-02 | -0.93 | -0.97 |
| <i>lpg1209</i> | conserved hypothetical protein                                          |               | Unknown / hypothetical proteins          | 10.109 | 11.208 | 11.094 | 11.725 | 2.42E-02 | 1.56E-01 | 1.10  | 0.63  |
| <i>lpg1209</i> | conserved hypothetical protein                                          |               | Unknown / hypothetical proteins          | 9.863  | 11.313 | 10.797 | 11.690 | 1.01E-02 | 1.63E-02 | 1.45  | 0.89  |
| <i>lpg1210</i> | acetyltransferase (ribosomal-protein alanine acetyltransferase)         |               | Named proteins of general function       | 10.790 | 10.618 | 9.425  | 11.598 | 6.36E-01 | 1.05E-03 | -0.17 | 2.17  |
| <i>lpg1210</i> | acetyltransferase (ribosomal-protein alanine acetyltransferase)         |               | Named proteins of general function       | 10.795 | 10.694 | 9.254  | 11.626 | 8.13E-01 | 3.00E-03 | -0.10 | 2.37  |
| <i>lpg1211</i> | transporter, LysE family (threonine efflux)                             |               | Transport and binding                    | 10.404 | 9.401  | 10.476 | 9.485  | 1.74E-04 | 3.25E-02 | -1.00 | -0.99 |
| <i>lpg1211</i> | transporter, LysE family (threonine efflux)                             |               | Transport and binding                    | 10.232 | 9.745  | 10.406 | 9.704  | 2.18E-01 | 1.46E-01 | -0.49 | -0.70 |
| <i>lpg1212</i> | IAA acetyltransferase/MarR transcriptional regulatory protein - fused r |               | Transcription factors / DNA binding prc  | 10.500 | 9.294  | 9.488  | 9.802  | 1.55E-02 | 5.27E-01 | -1.21 | 0.31  |
| <i>lpg1212</i> | IAA acetyltransferase/MarR transcriptional regulatory protein - fused r |               | Transcription factors / DNA binding prc  | 10.477 | 10.502 | 9.086  | 10.120 | 9.76E-01 | 7.13E-02 | 0.03  | 1.03  |
| <i>lpg1213</i> | hypothetical (ATPase)                                                   |               | Named proteins of general function       | 10.741 | 9.595  | 9.264  | 9.766  | 7.82E-02 | 3.33E-01 | -1.15 | 0.50  |
| <i>lpg1213</i> | hypothetical (ATPase)                                                   |               | Named proteins of general function       | 10.444 | 10.515 | 8.757  | 10.319 | 9.45E-01 | 2.27E-01 | 0.07  | 1.56  |
| <i>lpg1214</i> | 2-acylglycerophosphoethanolamine acyltransferase (aas) (transporter)    |               | Lipid Metabolism                         | 12.186 | 11.740 | 12.062 | 12.712 | 1.34E-01 | 5.10E-02 | -0.45 | 0.65  |
| <i>lpg1214</i> | 2-acylglycerophosphoethanolamine acyltransferase (aas) (transporter)    |               | Lipid Metabolism                         | 12.173 | 11.737 | 11.983 | 12.713 | 1.33E-01 | 3.41E-02 | -0.44 | 0.73  |
| <i>lpg1215</i> | oxygen-dependent coproporphyrinogen III oxidase                         | <i>hemF</i>   | Metabolism of Cofactors and Vitamins     | 11.633 | 11.236 | 10.376 | 10.472 | 2.60E-01 | 8.68E-01 | -0.40 | 0.10  |
| <i>lpg1215</i> | oxygen-dependent coproporphyrinogen III oxidase                         | <i>hemF</i>   | Metabolism of Cofactors and Vitamins     | 11.720 | 11.234 | 10.637 | 10.785 | 1.18E-01 | 7.19E-01 | -0.49 | 0.15  |
| <i>lpg1216</i> | flagellar basal body rod protein FlgB                                   | <i>flgB</i>   | Chemotaxis / motility / cell division    | 10.739 | 11.261 | 12.385 | 10.773 | 3.72E-01 | 6.24E-03 | 0.52  | -1.61 |
| <i>lpg1216</i> | flagellar basal body rod protein FlgB                                   | <i>flgB</i>   | Chemotaxis / motility / cell division    | 10.832 | 12.012 | 12.425 | 11.612 | 6.29E-03 | 1.74E-02 | 1.18  | -0.81 |
| <i>lpg1217</i> | flagellar basal body rod protein FlgC                                   | <i>flgC</i>   | Chemotaxis / motility / cell division    | 11.076 | 12.025 | 13.065 | 11.133 | 8.96E-02 | 1.11E-02 | 0.95  | -1.93 |
| <i>lpg1217</i> | flagellar basal body rod protein FlgC                                   | <i>flgC</i>   | Chemotaxis / motility / cell division    | 11.018 | 11.358 | 13.067 | 11.186 | 7.38E-01 | 1.27E-02 | 0.34  | -1.88 |
| <i>lpg1218</i> | flagellar basal body rod modification protein FlgD                      | <i>flgD</i>   | Chemotaxis / motility / cell division    | 9.830  | 10.558 | 12.304 | 8.835  | 3.45E-01 | 4.03E-04 | 0.73  | -3.47 |
| <i>lpg1218</i> | flagellar basal body rod modification protein FlgD                      | <i>flgD</i>   | Chemotaxis / motility / cell division    | 9.933  | 10.319 | 12.332 | 9.230  | 5.86E-01 | 1.42E-03 | 0.39  | -3.10 |
| <i>lpg1219</i> | flagellar hook protein FlgE                                             | <i>flgE</i>   | Chemotaxis / motility / cell division    | 9.074  | 9.282  | 11.585 | 8.647  | 7.92E-01 | 3.24E-02 | 0.21  | -2.94 |
| <i>lpg1219</i> | flagellar hook protein FlgE                                             | <i>flgE</i>   | Chemotaxis / motility / cell division    | 8.726  | 9.528  | 11.479 | 9.067  | 3.99E-01 | 4.14E-02 | 0.80  | -2.41 |
| <i>lpg1220</i> | flagellar basal body rod protein FlgF                                   | <i>flgF</i>   | Chemotaxis / motility / cell division    | 10.312 | 11.290 | 13.059 | 10.890 | 1.65E-01 | 5.87E-03 | 0.98  | -2.17 |
| <i>lpg1220</i> | flagellar basal body rod protein FlgF                                   | <i>flgF</i>   | Chemotaxis / motility / cell division    | 10.379 | 11.636 | 13.201 | 11.432 | 1.86E-01 | 4.12E-02 | 1.26  | -1.77 |
| <i>lpg1221</i> | flagellar basal body rod protein FlgG                                   | <i>flgG</i>   | Chemotaxis / motility / cell division    | 9.751  | 9.789  | 11.076 | 7.978  | 9.40E-01 | 1.31E-03 | 0.04  | -3.10 |
| <i>lpg1221</i> | flagellar basal body rod protein FlgG                                   | <i>flgG</i>   | Chemotaxis / motility / cell division    | 9.815  | 9.720  | 11.008 | 8.460  | 8.46E-01 | 5.70E-03 | -0.10 | -2.55 |
| <i>lpg1222</i> | flagellar L-ring protein FlgH                                           | <i>flgH</i>   | Chemotaxis / motility / cell division    | 10.275 | 11.200 | 11.612 | 10.541 | 4.60E-02 | 2.64E-02 | 0.92  | -1.07 |
| <i>lpg1222</i> | flagellar L-ring protein FlgH                                           | <i>flgH</i>   | Chemotaxis / motility / cell division    | 9.882  | 11.072 | 11.443 | 10.544 | 2.93E-02 | 4.55E-02 | 1.19  | -0.90 |
| <i>lpg1223</i> | flagellar P-ring protein (precursor) FlgI                               | <i>flgI</i>   | Chemotaxis / motility / cell division    | 9.385  | 9.100  | 11.078 | 8.962  | 6.50E-01 | 2.16E-03 | -0.28 | -2.12 |
| <i>lpg1223</i> | flagellar P-ring protein (precursor) FlgI                               | <i>flgI</i>   | Chemotaxis / motility / cell division    | 9.091  | 9.273  | 11.151 | 9.294  | 7.56E-01 | 4.10E-03 | 0.18  | -1.86 |
| <i>lpg1224</i> | muramidase, peptidoglycan hydrolase FlgJ (flagellar protein)            |               | Protein fate / hydrolases / secretion, C | 9.484  | 8.330  | 10.967 | 6.117  | 1.54E-01 | 1.10E-02 | -1.15 | -4.85 |
| <i>lpg1224</i> | muramidase, peptidoglycan hydrolase FlgJ (flagellar protein)            |               | Protein fate / hydrolases / secretion, C | 11.282 | 9.563  | 11.030 | 9.028  | 7.83E-02 | 7.02E-02 | -1.72 | -2.00 |
| <i>lpg1225</i> | flagellar hook associated protein 1 FlgK                                | <i>flgK</i>   | Chemotaxis / motility / cell division    | 11.234 | 10.928 | 12.384 | 11.228 | 4.85E-01 | 6.26E-03 | -0.31 | -1.16 |
| <i>lpg1225</i> | flagellar hook associated protein 1 FlgK                                | <i>flgK</i>   | Chemotaxis / motility / cell division    | 11.136 | 11.193 | 12.266 | 11.213 | 8.77E-01 | 1.02E-02 | 0.06  | -1.05 |
| <i>lpg1226</i> | flagellar hook associated protein type 3 FlgL                           | <i>flgL</i>   | Chemotaxis / motility / cell division    | 9.786  | 9.269  | 12.310 | 9.182  | 4.29E-01 | 2.55E-04 | -0.52 | -3.13 |
| <i>lpg1226</i> | flagellar hook associated protein type 3 FlgL                           | <i>flgL</i>   | Chemotaxis / motility / cell division    | 9.667  | 9.164  | 12.282 | 9.913  | 3.98E-01 | 5.06E-03 | -0.50 | -2.37 |
| <i>lpg1227</i> | unknown                                                                 | <i>vpdB</i>   | Unknown / hypothetical proteins          | 9.171  | 8.403  | 10.192 | 7.696  | 4.76E-01 | 4.35E-02 | -0.77 | -2.50 |
| <i>lpg1227</i> | unknown                                                                 | <i>vpdB</i>   | Unknown / hypothetical proteins          | 7.111  | 7.655  | 9.698  | 7.646  | 7.89E-01 | 1.41E-01 | 0.54  | -2.05 |

|                |                                                                      |               |                                           |        |        |        |        |          |          |       |       |
|----------------|----------------------------------------------------------------------|---------------|-------------------------------------------|--------|--------|--------|--------|----------|----------|-------|-------|
| <i>lpg1228</i> | hypothetical COG4804                                                 |               | Unknown / hypothetical proteins           | 11.302 | 10.013 | 9.573  | 11.003 | 4.11E-01 | 7.38E-02 | -1.29 | 1.43  |
| <i>lpg1228</i> | hypothetical COG4804                                                 |               | Unknown / hypothetical proteins           | 11.278 | 11.447 | 9.460  | 11.571 | 2.50E-01 | 3.69E-04 | 0.17  | 2.11  |
| <i>lpg1229</i> | site specific recombinase (phage integrase)                          |               | Viral functions / Phage / Transposases    | 11.741 | 13.134 | 11.428 | 12.746 | 1.20E-03 | 1.42E-01 | 1.39  | 1.32  |
| <i>lpg1229</i> | site specific recombinase (phage integrase)                          |               | Viral functions / Phage / Transposases    | 11.999 | 13.257 | 10.894 | 12.812 | 4.61E-04 | 1.28E-04 | 1.26  | 1.92  |
| <i>lpg1230</i> | hypothetical                                                         |               | Unknown / hypothetical proteins           | 9.265  | 12.902 | 10.858 | 12.097 | 1.18E-03 | 2.98E-01 | 3.64  | 1.24  |
| <i>lpg1230</i> | hypothetical                                                         |               | Unknown / hypothetical proteins           | 9.281  | 12.029 | 10.981 | 12.762 | 5.61E-02 | 3.61E-02 | 2.75  | 1.78  |
| <i>lpg1231</i> | SOS response transcriptional regulator (SOS mutagenes <i>umuD</i> )  |               | Detoxification / adaptation, Transcriptic | 9.647  | 9.876  | 10.822 | 10.157 | 5.94E-01 | 7.81E-02 | 0.23  | -0.67 |
| <i>lpg1231</i> | SOS response transcriptional regulator (SOS mutagenes <i>umuD</i> )  |               | Detoxification / adaptation, Transcriptic | 9.269  | 9.536  | 10.509 | 10.771 | 4.81E-01 | 5.82E-01 | 0.27  | 0.26  |
| <i>lpg1232</i> | hypothetical (SOS mutagenesis and repair) RumB (Umu <i>umuC</i> )    |               | Replication and Repair                    | 9.594  | 8.995  | 9.717  | 9.864  | 2.88E-01 | 7.43E-01 | -0.60 | 0.15  |
| <i>lpg1232</i> | hypothetical (SOS mutagenesis and repair) RumB (Umu <i>umuC</i> )    |               | Replication and Repair                    | 9.122  | 7.792  | 9.019  | 9.916  | 2.75E-01 | 8.73E-02 | -1.33 | 0.90  |
| <i>lpg1233</i> | ORF                                                                  |               | ORFs of unknown function (unique)         | 9.774  | 10.380 | 9.386  | 7.669  | 2.64E-01 | 1.09E-01 | 0.61  | -1.72 |
| <i>lpg1233</i> | ORF                                                                  |               | ORFs of unknown function (unique)         | 9.226  | 10.167 | 9.377  | 8.574  | 1.77E-01 | 3.68E-01 | 0.94  | -0.80 |
| <i>lpg1234</i> | hypothetical                                                         |               | Unknown / hypothetical proteins           | 10.882 | 10.275 | 12.945 | 10.076 | 5.18E-01 | 2.70E-03 | -0.61 | -2.87 |
| <i>lpg1234</i> | hypothetical                                                         |               | Unknown / hypothetical proteins           | 10.911 | 11.105 | 12.924 | 10.311 | 8.35E-01 | 2.69E-03 | 0.19  | -2.61 |
| <i>lpg1235</i> | patch repair protein (DNA mismatch endonuclease) <i>vsr</i>          | <i>vsr</i>    | Replication and Repair                    | 9.169  | 9.423  | 10.901 | 8.721  | 7.17E-01 | 2.68E-02 | 0.25  | -2.18 |
| <i>lpg1235</i> | patch repair protein (DNA mismatch endonuclease) <i>vsr</i>          | <i>vsr</i>    | Replication and Repair                    | 9.035  | 8.818  | 10.377 | 8.681  | 7.75E-01 | 1.74E-01 | -0.22 | -1.70 |
| <i>lpg1236</i> | modification methylase (Eco47II, Sau96I) (site-specific DNA-methyltr |               | DNA/RNA degradation / restriction         | 12.634 | 13.772 | 13.201 | 13.002 | 4.41E-03 | 5.11E-01 | 1.14  | -0.20 |
| <i>lpg1236</i> | modification methylase (Eco47II, Sau96I) (site-specific DNA-methyltr |               | DNA/RNA degradation / restriction         | 12.602 | 13.811 | 13.197 | 13.017 | 2.23E-03 | 5.50E-01 | 1.21  | -0.18 |
| <i>lpg1237</i> | type II restriction enzyme (Eco47II, Sau96I)                         |               | DNA/RNA degradation / restriction         | 11.890 | 13.286 | 10.047 | 14.085 | 1.20E-01 | 1.52E-05 | 1.40  | 4.04  |
| <i>lpg1237</i> | type II restriction enzyme (Eco47II, Sau96I)                         |               | DNA/RNA degradation / restriction         | 12.094 | 13.252 | 9.541  | 14.128 | 8.49E-02 | 2.20E-05 | 1.16  | 4.59  |
| <i>lpg1238</i> | ORF                                                                  |               | ORFs of unknown function (unique)         | 9.701  | 9.183  | 7.676  | 9.273  | 4.68E-01 | 3.16E-01 | -0.52 | 1.60  |
| <i>lpg1238</i> | ORF                                                                  |               | ORFs of unknown function (unique)         | 9.590  | 9.779  | 8.312  | 10.236 | 6.41E-01 | 1.65E-02 | 0.19  | 1.92  |
| <i>lpg1239</i> | TraD (weak homology)                                                 |               | Transport and binding                     | 11.633 | 12.588 | 12.442 | 11.983 | 1.58E-03 | 1.28E-02 | 0.96  | -0.46 |
| <i>lpg1239</i> | TraD (weak homology)                                                 |               | Transport and binding                     | 11.672 | 12.244 | 12.335 | 11.925 | 2.77E-03 | 5.11E-02 | 0.57  | -0.41 |
| <i>lpg1240</i> | ORF                                                                  |               | ORFs of unknown function (unique)         | 9.989  | 9.141  | 9.279  | 8.420  | 2.09E-01 | 5.24E-01 | -0.85 | -0.86 |
| <i>lpg1240</i> | ORF                                                                  |               | ORFs of unknown function (unique)         | 10.035 | 9.470  | 9.395  | 9.843  | 3.26E-01 | 6.09E-01 | -0.56 | 0.45  |
| <i>lpg1241</i> | conjugal transfer protein TraA                                       | <i>traA</i>   | Transport and binding, Viral functions /  | 7.119  | 7.586  | 7.187  | 7.739  | 5.78E-01 | 6.97E-01 | 0.47  | 0.55  |
| <i>lpg1241</i> | conjugal transfer protein TraA                                       | <i>traA</i>   | Transport and binding, Viral functions /  | 8.283  | 8.604  | 7.851  | 8.694  | 6.22E-01 | 4.80E-01 | 0.32  | 0.84  |
| <i>lpg1242</i> | ; <i>lpg2421</i> ; transposase (ISSod13) (integrase)                 |               | Viral functions / Phage / Transposases    | 11.272 | 10.600 | 10.552 | 10.828 | 3.64E-01 | 5.24E-01 | -0.67 | 0.28  |
| <i>lpg1242</i> | ; <i>lpg2421</i> ; transposase (ISSod13) (integrase)                 |               | Viral functions / Phage / Transposases    | 10.738 | 11.062 | 10.548 | 10.942 | 9.07E-02 | 3.72E-01 | 0.32  | 0.39  |
| <i>lpg1243</i> | hypothetical                                                         |               | Unknown / hypothetical proteins           | 9.405  | 8.712  | 10.263 | 8.159  | 4.98E-02 | 1.00E-01 | -0.69 | -2.10 |
| <i>lpg1243</i> | hypothetical                                                         |               | Unknown / hypothetical proteins           | 10.038 | 9.334  | 10.308 | 9.066  | 5.13E-02 | 9.46E-02 | -0.70 | -1.24 |
| <i>lpg1244</i> | LvrE                                                                 | <i>lvrE</i>   | Transport and binding, Protein fate / h   | 10.592 | 10.201 | 11.921 | 10.770 | 4.10E-01 | 7.42E-03 | -0.39 | -1.15 |
| <i>lpg1244</i> | LvrE                                                                 | <i>lvrE</i>   | Transport and binding, Protein fate / h   | 10.546 | 10.663 | 11.817 | 10.951 | 6.37E-01 | 9.73E-02 | 0.12  | -0.87 |
| <i>lpg1245</i> | LvhD4 (VirD4)                                                        | <i>virD4</i>  | Transport and binding, Protein fate / h   | 7.336  | 8.110  | 8.508  | 8.267  | 5.46E-01 | 6.43E-01 | 0.77  | -0.24 |
| <i>lpg1245</i> | LvhD4 (VirD4)                                                        | <i>virD4</i>  | Transport and binding, Protein fate / h   | 7.460  | 8.856  | 8.660  | 8.568  | 7.86E-02 | 8.13E-01 | 1.40  | -0.09 |
| <i>lpg1246</i> | LvhB11 (VirB11)                                                      | <i>virB11</i> | Transport and binding, Protein fate / h   | 8.894  | 10.295 | 9.790  | 10.390 | 2.90E-03 | 3.09E-01 | 1.40  | 0.60  |
| <i>lpg1246</i> | LvhB11 (VirB11)                                                      | <i>virB11</i> | Transport and binding, Protein fate / h   | 8.957  | 10.192 | 9.699  | 10.379 | 2.15E-02 | 3.11E-01 | 1.23  | 0.68  |
| <i>lpg1247</i> | LvhB10 (type IV secretion system protein B10)                        |               | Transport and binding, Protein fate / h   | 8.918  | 9.255  | 10.257 | 8.898  | 4.06E-01 | 5.33E-02 | 0.34  | -1.36 |
| <i>lpg1247</i> | LvhB10 (type IV secretion system protein B10)                        |               | Transport and binding, Protein fate / h   | 9.078  | 9.461  | 10.064 | 9.120  | 5.69E-02 | 5.16E-02 | 0.38  | -0.94 |
| <i>lpg1248</i> | LvhB9 (probable conjugal transfer protein TrbG)                      | <i>virB9</i>  | Transport and binding, Protein fate / h   | 7.936  | 6.389  | 8.845  | 6.588  | 3.56E-02 | 3.34E-02 | -1.55 | -2.26 |
| <i>lpg1248</i> | LvhB9 (probable conjugal transfer protein TrbG)                      | <i>virB9</i>  | Transport and binding, Protein fate / h   | 8.379  | 8.275  | 9.566  | 7.848  | 8.84E-01 | 1.78E-02 | -0.10 | -1.72 |
| <i>lpg1249</i> | LvhB8 (conjugal transfer protein)                                    | <i>virB8</i>  | Transport and binding, Protein fate / h   | 8.539  | 10.749 | 10.617 | 9.441  | 2.10E-05 | 7.43E-02 | 2.21  | -1.18 |
| <i>lpg1249</i> | LvhB8 (conjugal transfer protein)                                    | <i>virB8</i>  | Transport and binding, Protein fate / h   | 8.159  | 9.664  | 9.891  | 9.123  | 3.67E-02 | 1.23E-01 | 1.50  | -0.77 |
| <i>lpg1250</i> | LvhB6 (conjugal transfer protein)                                    | <i>virB6</i>  | Transport and binding, Protein fate / h   | 8.829  | 8.705  | 10.686 | 7.902  | 8.27E-01 | 1.36E-02 | -0.12 | -2.78 |
| <i>lpg1250</i> | LvhB6 (conjugal transfer protein)                                    | <i>virB6</i>  | Transport and binding, Protein fate / h   | 9.208  | 9.641  | 10.066 | 8.227  | 3.70E-01 | 7.63E-02 | 0.43  | -1.84 |
| <i>lpg1251</i> | LvrD                                                                 | <i>lvrD</i>   | Transport and binding, Protein fate / h   | 9.617  | 10.178 | 10.515 | 9.955  | 1.70E-01 | 3.08E-01 | 0.56  | -0.56 |
| <i>lpg1251</i> | LvrD                                                                 | <i>lvrD</i>   | Transport and binding, Protein fate / h   | 8.990  | 9.981  | 8.023  | 9.830  | 6.13E-02 | 2.23E-01 | 0.99  | 1.81  |
| <i>lpg1252</i> | LvhB7                                                                |               | Transport and binding, Protein fate / h   | 8.387  | 8.934  | 9.408  | 9.288  | 3.14E-01 | 8.27E-01 | 0.55  | -0.12 |
| <i>lpg1252</i> | LvhB7                                                                |               | Transport and binding, Protein fate / h   | 8.235  | 8.966  | 8.942  | 9.214  | 1.69E-01 | 5.66E-01 | 0.73  | 0.27  |
| <i>lpg1253</i> | LvhB5 (plasmid-related export protein)                               | <i>virB5</i>  | Transport and binding, Protein fate / h   | 7.028  | 6.566  | 8.466  | 10.221 | 7.29E-01 | 1.22E-01 | -0.46 | 1.76  |
| <i>lpg1253</i> | LvhB5 (plasmid-related export protein)                               | <i>virB5</i>  | Transport and binding, Protein fate / h   | 5.397  | 15.086 | 8.423  | 14.896 | 1.37E-01 | 3.44E-03 | 9.69  | 6.47  |
| <i>lpg1254</i> | LvhB4 (type IV secretion system protein B4)                          | <i>virB4</i>  | Transport and binding, Protein fate / h   | 9.376  | 10.065 | 9.644  | 8.741  | 1.55E-01 | 1.13E-01 | 0.69  | -0.90 |
| <i>lpg1254</i> | LvhB4 (type IV secretion system protein B4)                          | <i>virB4</i>  | Transport and binding, Protein fate / h   | 10.066 | 9.944  | 9.870  | 9.279  | 6.84E-01 | 2.50E-01 | -0.12 | -0.59 |
| <i>lpg1255</i> | LvhB3 (type IV secretion system protein B3)                          |               | Transport and binding, Protein fate / h   | 8.585  | 8.181  | 9.714  | 7.372  | 8.63E-01 | 1.35E-01 | -0.40 | -2.34 |
| <i>lpg1255</i> | LvhB3 (type IV secretion system protein B3)                          |               | Transport and binding, Protein fate / h   | 8.278  | 8.542  | 9.017  | 9.050  | 8.59E-01 | 9.73E-01 | 0.26  | 0.03  |
| <i>lpg1256</i> | ORF                                                                  |               | ORFs of unknown function (unique)         | 7.550  | 9.451  | 9.109  | 9.383  | 2.19E-01 | 7.07E-01 | 1.90  | 0.27  |
| <i>lpg1256</i> | ORF                                                                  |               | ORFs of unknown function (unique)         | 8.329  | 9.495  | 9.543  | 10.204 | 2.33E-01 | 5.15E-01 | 1.17  | 0.66  |
| <i>lpg1257</i> | LvrC (carbon storage regulator)                                      | <i>csrA</i>   | Transport and binding, Protein fate / h   | 7.756  | 8.954  | 8.609  | 7.855  | 2.61E-01 | 4.45E-01 | 1.20  | -0.75 |
| <i>lpg1257</i> | LvrC (carbon storage regulator)                                      | <i>csrA</i>   | Transport and binding, Protein fate / h   | 7.802  | 7.115  | 8.022  | 7.563  | 5.32E-01 | 5.15E-01 | -0.69 | -0.46 |
| <i>lpg1258</i> | LvrB                                                                 | <i>lvrB</i>   | Transport and binding, Protein fate / h   | 9.889  | 12.568 | 11.741 | 13.531 | 1.21E-01 | 1.54E-01 | 2.68  | 1.79  |
| <i>lpg1258</i> | LvrB                                                                 | <i>lvrB</i>   | Transport and binding, Protein fate / h   | 10.942 | 15.319 | 12.499 | 15.429 | 5.95E-04 | 5.55E-05 | 4.38  | 2.93  |
| <i>lpg1259</i> | LvrA                                                                 | <i>lvrA</i>   | Transport and binding, Protein fate / h   | 9.013  | 10.776 | 10.058 | 10.252 | 8.29E-03 | 4.56E-01 | 1.76  | 0.19  |
| <i>lpg1259</i> | LvrA                                                                 | <i>lvrA</i>   | Transport and binding, Protein fate / h   | 9.557  | 10.991 | 9.935  | 10.670 | 2.64E-02 | 1.59E-01 | 1.43  | 0.74  |

|                |                                                                                |                                          |        |        |        |        |          |          |       |       |
|----------------|--------------------------------------------------------------------------------|------------------------------------------|--------|--------|--------|--------|----------|----------|-------|-------|
| <i>lpg1260</i> | phage repressor (putative repressor protein of prophage) <i>prpA</i>           | Transcription factors / DNA binding prc  | 9.610  | 11.682 | 8.816  | 11.351 | 2.75E-04 | 4.58E-04 | 2.07  | 2.54  |
| <i>lpg1260</i> | phage repressor (putative repressor protein of prophage) <i>prpA</i>           | Transcription factors / DNA binding prc  | 9.692  | 11.458 | 8.017  | 11.662 | 2.83E-03 | 5.37E-04 | 1.77  | 3.64  |
| <i>lpg1261</i> | small ORF (129aa)                                                              | ORFs of unknown function (unique)        | 9.085  | 8.480  | 8.857  | 8.994  | 5.35E-01 | 8.60E-01 | -0.60 | 0.14  |
| <i>lpg1261</i> | small ORF (129aa)                                                              | ORFs of unknown function (unique)        | 8.476  | 8.808  | 8.894  | 9.170  | 7.33E-01 | 6.56E-01 | 0.33  | 0.28  |
| <i>lpg1262</i> | small ORF (112aa)                                                              | ORFs of unknown function (unique)        | 10.778 | 10.795 | 10.214 | 9.850  | 9.46E-01 | 1.98E-01 | 0.02  | -0.36 |
| <i>lpg1262</i> | small ORF (112aa)                                                              | ORFs of unknown function (unique)        | 10.935 | 10.735 | 10.123 | 9.897  | 2.96E-01 | 6.46E-01 | -0.20 | -0.23 |
| <i>lpg1263</i> | ORF                                                                            | ORFs of unknown function (unique)        | 9.567  | 10.038 | 10.516 | 9.163  | 4.67E-01 | 9.75E-02 | 0.47  | -1.35 |
| <i>lpg1263</i> | ORF                                                                            | ORFs of unknown function (unique)        | 9.451  | 10.097 | 9.991  | 9.933  | 4.42E-01 | 9.54E-01 | 0.65  | -0.06 |
| <i>lpg1264</i> | proton/peptide symporter family protein                                        | Transport and binding                    | 10.192 | 9.944  | 9.858  | 10.573 | 7.73E-01 | 3.03E-01 | -0.25 | 0.71  |
| <i>lpg1264</i> | proton/peptide symporter family protein                                        | Transport and binding                    | 10.283 | 9.632  | 9.874  | 11.203 | 5.72E-01 | 4.17E-02 | -0.65 | 1.33  |
| <i>lpg1265</i> | ORF                                                                            | ORFs of unknown function (unique)        | 9.540  | 8.387  | 8.807  | 8.008  | 1.18E-01 | 4.00E-01 | -1.15 | -0.80 |
| <i>lpg1265</i> | ORF                                                                            | ORFs of unknown function (unique)        | 8.945  | 8.976  | 9.189  | 8.705  | 9.68E-01 | 3.40E-01 | 0.03  | -0.48 |
| <i>lpg1266</i> | methylase                                                                      | Named proteins of general function       | 8.853  | 9.021  | 8.412  | 8.407  | 8.53E-01 | 9.96E-01 | 0.17  | 0.00  |
| <i>lpg1266</i> | methylase                                                                      | Named proteins of general function       | 9.262  | 9.144  | 8.759  | 8.816  | 8.26E-01 | 9.36E-01 | -0.12 | 0.06  |
| <i>lpg1267</i> | hypothetical (dGTP triphosphohydrolase?) (nucleotidyltransferase?)             | Unknown / hypothetical proteins          | 8.490  | 7.572  | 9.881  | 6.842  | 4.47E-01 | 2.70E-02 | -0.92 | -3.04 |
| <i>lpg1267</i> | hypothetical (dGTP triphosphohydrolase?) (nucleotidyltransferase?)             | Unknown / hypothetical proteins          | 8.700  | 7.721  | 9.964  | 8.956  | 5.45E-01 | 4.81E-03 | -0.98 | -1.01 |
| <i>lpg1268</i> | ORF                                                                            | ORFs of unknown function (unique)        | 10.433 | 9.349  | 9.713  | 9.560  | 6.83E-02 | 7.67E-01 | -1.08 | -0.15 |
| <i>lpg1268</i> | ORF                                                                            | ORFs of unknown function (unique)        | 10.781 | 9.809  | 9.762  | 9.874  | 1.15E-02 | 7.92E-01 | -0.97 | 0.11  |
| <i>lpg1269</i> | hypothetical                                                                   | Unknown / hypothetical proteins          | 10.445 | 10.496 | 9.568  | 10.615 | 8.65E-01 | 1.00E-01 | 0.05  | 1.05  |
| <i>lpg1269</i> | hypothetical                                                                   | Unknown / hypothetical proteins          | 10.771 | 10.004 | 9.485  | 11.048 | 2.29E-01 | 5.00E-02 | -0.77 | 1.56  |
| <i>lpg1270</i> | small ORF (152aa)                                                              | ORFs of unknown function (unique)        | 10.454 | 10.928 | 8.285  | 11.957 | 3.00E-01 | 1.45E-03 | 0.47  | 3.67  |
| <i>lpg1270</i> | small ORF (152aa)                                                              | ORFs of unknown function (unique)        | 10.766 | 11.354 | 8.330  | 12.240 | 5.50E-02 | 4.30E-03 | 0.59  | 3.91  |
| <i>lpg1271</i> | ISSod6 transposase, IS1301, COG3293                                            | Viral functions / Phage / Transposases   | 7.931  | 7.318  | 8.183  | 7.664  | 2.54E-01 | 4.86E-01 | -0.61 | -0.52 |
| <i>lpg1271</i> | ISSod6 transposase, IS1301, COG3293                                            | Viral functions / Phage / Transposases   | 8.409  | 6.044  | 7.778  | 7.493  | 8.96E-02 | 7.73E-01 | -2.37 | -0.28 |
| <i>lpg1272</i> | tRNA-Arg                                                                       | tRNA                                     | 9.742  | 8.495  | 9.344  | 7.162  | 7.41E-02 | 4.37E-02 | -1.25 | -2.18 |
| <i>lpg1272</i> | tRNA-Arg                                                                       | tRNA                                     | 9.445  | 8.559  | 9.710  | 7.960  | 3.97E-01 | 4.39E-02 | -0.89 | -1.75 |
| <i>lpg1273</i> | ORF                                                                            | ORFs of unknown function (unique)        | 11.408 | 11.008 | 10.671 | 10.985 | 1.81E-01 | 3.94E-01 | -0.40 | 0.31  |
| <i>lpg1273</i> | ORF                                                                            | ORFs of unknown function (unique)        | 11.216 | 10.967 | 10.477 | 10.949 | 5.03E-01 | 3.31E-01 | -0.25 | 0.47  |
| <i>lpg1274</i> | hypothetical                                                                   | Unknown / hypothetical proteins          | 10.988 | 7.678  | 12.904 | 6.308  | 2.57E-03 | 1.28E-04 | -3.31 | -6.60 |
| <i>lpg1274</i> | hypothetical                                                                   | Unknown / hypothetical proteins          | 10.865 | 8.602  | 13.235 | 6.912  | 1.40E-02 | 3.01E-04 | -2.26 | -6.32 |
| <i>lpg1275</i> | transporter, TrkA family (ion transport) (di- and tricarboxylate transpor      | Transport and binding                    | 9.527  | 8.371  | 10.514 | 9.365  | 3.84E-01 | 3.00E-01 | -1.16 | -1.15 |
| <i>lpg1275</i> | transporter, TrkA family (ion transport) (di- and tricarboxylate transpor      | Transport and binding                    | 8.888  | 8.938  | 9.054  | 8.545  | 9.35E-01 | 5.28E-01 | 0.05  | -0.51 |
| <i>lpg1276</i> | electron transferring flavoprotein dehydrogenase (electron transfer fla        | Energy Metabolism                        | 11.518 | 11.526 | 12.017 | 11.919 | 9.64E-01 | 7.00E-01 | 0.01  | -0.10 |
| <i>lpg1276</i> | electron transferring flavoprotein dehydrogenase (electron transfer fla        | Energy Metabolism                        | 11.359 | 11.538 | 12.000 | 12.060 | 5.23E-01 | 7.93E-01 | 0.18  | 0.06  |
| <i>lpg1277</i> | ABC transporter ATP binding protein ( <i>abcT3</i> ) (multidrug <i>r abcT3</i> | Transport and binding                    | 11.080 | 10.962 | 11.077 | 11.046 | 7.63E-01 | 9.15E-01 | -0.12 | -0.03 |
| <i>lpg1277</i> | ABC transporter ATP binding protein ( <i>abcT3</i> ) (multidrug <i>r abcT3</i> | Transport and binding                    | 11.098 | 11.001 | 10.361 | 11.073 | 6.78E-01 | 1.68E-01 | -0.10 | 0.71  |
| <i>lpg1278</i> | small ORF (105aa) hypothetical                                                 | Unknown / hypothetical proteins          | 10.990 | 10.484 | 11.221 | 10.351 | 2.05E-01 | 1.04E-01 | -0.51 | -0.87 |
| <i>lpg1278</i> | small ORF (105aa) hypothetical                                                 | Unknown / hypothetical proteins          | 10.869 | 10.911 | 11.237 | 10.443 | 7.03E-01 | 1.48E-01 | 0.04  | -0.79 |
| <i>lpg1279</i> | small ORF (123aa) hypothetical                                                 | Unknown / hypothetical proteins          | 11.541 | 11.113 | 12.551 | 10.063 | 1.38E-01 | 6.98E-05 | -0.43 | -2.49 |
| <i>lpg1279</i> | small ORF (123aa) hypothetical                                                 | Unknown / hypothetical proteins          | 11.534 | 10.761 | 12.543 | 10.159 | 6.28E-02 | 1.51E-04 | -0.77 | -2.38 |
| <i>lpg1280</i> | malate oxidoreductase (NAD linked malic enzyme) (mala <i>sfcA</i>              | Carbohydrate Metabolism                  | 11.212 | 10.866 | 8.930  | 11.129 | 6.00E-01 | 4.83E-02 | -0.35 | 2.20  |
| <i>lpg1280</i> | malate oxidoreductase (NAD linked malic enzyme) (mala <i>sfcA</i>              | Carbohydrate Metabolism                  | 10.904 | 11.575 | 9.077  | 12.060 | 2.88E-01 | 1.10E-04 | 0.67  | 2.98  |
| <i>lpg1281</i> | hypothetical (L. pneumophila unknown protein)                                  | Unknown / hypothetical proteins          | 11.283 | 11.511 | 11.069 | 11.760 | 5.26E-01 | 1.32E-01 | 0.23  | 0.69  |
| <i>lpg1281</i> | hypothetical (L. pneumophila unknown protein)                                  | Unknown / hypothetical proteins          | 10.993 | 11.238 | 10.859 | 11.707 | 7.05E-01 | 7.55E-02 | 0.24  | 0.85  |
| <i>lpg1282</i> | stationary phase survival protein SurE (acid phosphatase) <i>surE</i>          | Biodegradation of Xenobiotics, Metab     | 11.977 | 11.691 | 10.061 | 11.777 | 5.62E-01 | 4.10E-03 | -0.29 | 1.72  |
| <i>lpg1282</i> | stationary phase survival protein SurE (acid phosphatase) <i>surE</i>          | Biodegradation of Xenobiotics, Metab     | 12.057 | 11.722 | 9.814  | 11.778 | 3.98E-01 | 4.86E-03 | -0.34 | 1.96  |
| <i>lpg1283</i> | lipoprotein NlpD                                                               | Named proteins of general function       | 11.498 | 11.163 | 10.179 | 11.498 | 1.50E-01 | 1.07E-02 | -0.33 | 1.32  |
| <i>lpg1283</i> | lipoprotein NlpD                                                               | Named proteins of general function       | 11.452 | 11.136 | 10.136 | 11.457 | 2.01E-01 | 1.06E-02 | -0.32 | 1.32  |
| <i>lpg1284</i> | stationary phase specific sigma factor (RNA polymerase <i>rhoS</i>             | Toxin production / other pathogen func   | 12.356 | 12.493 | 12.228 | 12.342 | 6.96E-01 | 6.34E-01 | 0.14  | 0.11  |
| <i>lpg1284</i> | stationary phase specific sigma factor (RNA polymerase <i>rhoS</i>             | Toxin production / other pathogen func   | 12.266 | 12.639 | 12.180 | 12.589 | 2.97E-01 | 1.57E-02 | 0.37  | 0.41  |
| <i>lpg1285</i> | homogentisate 1,2-dioxygenase (homogentisicase)                                | Amino Acid Metabolism, Biodegradati      | 11.356 | 12.923 | 10.138 | 12.594 | 5.18E-06 | 8.98E-04 | 1.57  | 2.46  |
| <i>lpg1285</i> | homogentisate 1,2-dioxygenase (homogentisicase)                                | Amino Acid Metabolism, Biodegradati      | 11.263 | 12.650 | 9.841  | 12.613 | 2.18E-04 | 2.41E-03 | 1.39  | 2.77  |
| <i>lpg1286</i> | YebC (L. pneumophila) hypothetical (cytosolic protein?) TIGR01033              | Named proteins of general function       | 11.594 | 11.661 | 11.192 | 11.730 | 7.60E-01 | 7.27E-02 | 0.07  | 0.54  |
| <i>lpg1286</i> | YebC (L. pneumophila) hypothetical (cytosolic protein?) TIGR01033              | Named proteins of general function       | 11.303 | 11.843 | 11.136 | 11.697 | 2.42E-01 | 8.20E-02 | 0.54  | 0.56  |
| <i>lpg1287</i> | crossover junction endodeoxyribonuclease RuvC (Hollid <i>ruvC</i>              | Replication and Repair                   | 10.836 | 10.537 | 8.316  | 11.285 | 4.69E-01 | 7.66E-03 | -0.30 | 2.97  |
| <i>lpg1287</i> | crossover junction endodeoxyribonuclease RuvC (Hollid <i>ruvC</i>              | Replication and Repair                   | 10.358 | 10.513 | 7.937  | 11.263 | 8.57E-01 | 2.41E-02 | 0.15  | 3.33  |
| <i>lpg1288</i> | Holliday junction DNA helicase RuvA <i>ruvA</i>                                | Replication and Repair                   | 10.556 | 11.286 | 11.114 | 11.063 | 2.23E-01 | 8.77E-01 | 0.73  | -0.05 |
| <i>lpg1288</i> | Holliday junction DNA helicase RuvA <i>ruvA</i>                                | Replication and Repair                   | 10.486 | 11.987 | 10.998 | 11.676 | 1.44E-01 | 3.90E-01 | 1.50  | 0.68  |
| <i>lpg1289</i> | small ORF (106aa)                                                              | ORFs of unknown function (unique)        | 11.054 | 11.971 | 11.372 | 10.155 | 1.45E-03 | 3.03E-03 | 0.92  | -1.22 |
| <i>lpg1289</i> | small ORF (106aa)                                                              | ORFs of unknown function (unique)        | 10.865 | 11.929 | 11.287 | 10.366 | 7.96E-03 | 1.53E-02 | 1.06  | -0.92 |
| <i>lpg1290</i> | hypothetical protein                                                           | Unknown / hypothetical proteins          | 9.727  | 9.279  | 13.065 | 9.414  | 5.95E-01 | 2.15E-03 | -0.45 | -3.65 |
| <i>lpg1290</i> | hypothetical protein                                                           | Unknown / hypothetical proteins          | 9.613  | 9.606  | 13.070 | 10.308 | 9.92E-01 | 4.85E-03 | -0.01 | -2.76 |
| <i>lpg1291</i> | two component sensor kinase (transmembrane sensor histidine kinas              | Signal transduction / other regulatory f | 7.523  | 8.383  | 9.084  | 8.059  | 2.73E-01 | 5.12E-01 | 0.86  | -1.02 |
| <i>lpg1291</i> | two component sensor kinase (transmembrane sensor histidine kinas              | Signal transduction / other regulatory f | 8.151  | 8.660  | 9.261  | 9.322  | 5.79E-01 | 9.41E-01 | 0.51  | 0.06  |



|                |                                                                                    |              |                                           |        |        |        |        |          |          |       |       |
|----------------|------------------------------------------------------------------------------------|--------------|-------------------------------------------|--------|--------|--------|--------|----------|----------|-------|-------|
| <i>lpg1292</i> | DNA-binding response regulator (two component)                                     |              | Signal transduction / other regulatory f  | 12.344 | 11.399 | 13.359 | 11.217 | 1.42E-01 | 6.51E-05 | -0.94 | -2.14 |
| <i>lpg1292</i> | DNA-binding response regulator (two component)                                     |              | Signal transduction / other regulatory f  | 12.375 | 11.759 | 13.332 | 11.572 | 1.39E-01 | 1.36E-04 | -0.62 | -1.76 |
| <i>lpg1293</i> | intracellular septation protein A                                                  | <i>ispZ</i>  | Chemotaxis / motility / cell division     | 12.691 | 10.844 | 13.093 | 10.498 | 3.51E-04 | 3.89E-06 | -1.85 | -2.60 |
| <i>lpg1293</i> | intracellular septation protein A                                                  | <i>ispZ</i>  | Chemotaxis / motility / cell division     | 12.604 | 11.048 | 13.001 | 10.492 | 6.38E-04 | 3.38E-05 | -1.56 | -2.51 |
| <i>lpg1294</i> | membrane bound lytic murein transglycosylase D                                     |              | Cell envelope synthesis, Metabolism o     | 10.242 | 10.306 | 9.424  | 9.376  | 8.71E-01 | 9.44E-01 | 0.06  | -0.05 |
| <i>lpg1294</i> | membrane bound lytic murein transglycosylase D                                     |              | Cell envelope synthesis, Metabolism o     | 10.034 | 10.223 | 9.382  | 9.812  | 6.66E-01 | 2.95E-01 | 0.19  | 0.43  |
| <i>lpg1295</i> | hydroxyacylglutathione hydrolase GloB                                              |              | Carbohydrate Metabolism                   | 10.595 | 9.117  | 9.742  | 10.278 | 2.25E-02 | 3.37E-01 | -1.48 | 0.54  |
| <i>lpg1295</i> | hydroxyacylglutathione hydrolase GloB                                              |              | Carbohydrate Metabolism                   | 10.553 | 9.316  | 9.792  | 10.506 | 1.42E-01 | 3.31E-01 | -1.24 | 0.71  |
| <i>lpg1296</i> | protein involved in catabolism of external DNA                                     |              | DNA/RNA degradation / restriction         | 10.265 | 8.266  | 10.056 | 9.431  | 6.72E-03 | 1.65E-01 | -2.00 | -0.62 |
| <i>lpg1296</i> | protein involved in catabolism of external DNA                                     |              | DNA/RNA degradation / restriction         | 10.592 | 8.912  | 10.043 | 10.125 | 1.42E-03 | 6.90E-01 | -1.68 | 0.08  |
| <i>lpg1297</i> | 5,10-methylenetetrahydrofolate dehydrogenase (NADP) <sub>i</sub> / foID            |              | Carbohydrate Metabolism, Metabolism       | 9.777  | 9.329  | 10.588 | 8.623  | 3.53E-01 | 1.63E-03 | -0.45 | -1.97 |
| <i>lpg1297</i> | 5,10-methylenetetrahydrofolate dehydrogenase (NADP) <sub>i</sub> / foID            |              | Carbohydrate Metabolism, Metabolism       | 9.742  | 9.875  | 10.301 | 8.530  | 5.73E-01 | 2.01E-02 | 0.13  | -1.77 |
| <i>lpg1298</i> | small ORF (65aa) weak eukaryotic hits?                                             |              | Unknown / hypothetical proteins           | 9.147  | 8.350  | 12.285 | 8.455  | 2.83E-01 | 1.18E-03 | -0.80 | -3.83 |
| <i>lpg1298</i> | small ORF (65aa) weak eukaryotic hits?                                             |              | Unknown / hypothetical proteins           | 9.800  | 9.648  | 12.724 | 10.011 | 8.13E-01 | 1.67E-02 | -0.15 | -2.71 |
| <i>lpg1299</i> | transmembrane protein FimV (twitching motility) (LysM domain protein)              |              | Chemotaxis / motility / cell division, Me | 11.544 | 11.174 | 10.851 | 11.236 | 2.77E-01 | 3.34E-01 | -0.37 | 0.39  |
| <i>lpg1299</i> | transmembrane protein FimV (twitching motility) (LysM domain protein)              |              | Chemotaxis / motility / cell division, Me | 11.562 | 11.314 | 10.745 | 11.204 | 3.53E-01 | 2.98E-01 | -0.25 | 0.46  |
| <i>lpg1300</i> | integral membrane protein COG5528                                                  |              | Named proteins of general function        | 11.080 | 10.921 | 11.164 | 10.703 | 6.65E-01 | 1.57E-01 | -0.16 | -0.46 |
| <i>lpg1300</i> | integral membrane protein COG5528                                                  |              | Named proteins of general function        | 11.032 | 11.178 | 11.045 | 10.908 | 7.45E-01 | 6.77E-01 | 0.15  | -0.14 |
| <i>lpg1301</i> | oxidoreductase (NADH dehydrogenase/oxidoreductase) NolA                            |              | Metabolism of Cofactors and Vitamins      | 9.286  | 9.692  | 9.112  | 8.078  | 2.56E-01 | 3.05E-02 | 0.41  | -1.03 |
| <i>lpg1301</i> | oxidoreductase (NADH dehydrogenase/oxidoreductase) NolA                            |              | Metabolism of Cofactors and Vitamins      | 9.182  | 9.651  | 8.922  | 8.873  | 4.35E-01 | 9.13E-01 | -0.47 | -0.05 |
| <i>lpg1302</i> | tRNA pseudouridine synthase A                                                      |              | DNA/RNA degradation / restriction, Tr     | 12.140 | 11.331 | 10.653 | 11.379 | 2.70E-02 | 1.70E-01 | -0.81 | 0.73  |
| <i>lpg1302</i> | tRNA pseudouridine synthase A                                                      |              | DNA/RNA degradation / restriction, Tr     | 12.226 | 11.253 | 10.495 | 11.334 | 8.82E-03 | 1.33E-01 | -0.97 | 0.84  |
| <i>lpg1303</i> | phosphoribosyl anthranilate isomerase (N-5'-phosphoribosyl) trpF                   |              | Amino Acid Metabolism                     | 13.103 | 12.847 | 11.495 | 13.429 | 4.65E-01 | 4.12E-04 | -0.26 | 1.93  |
| <i>lpg1303</i> | phosphoribosyl anthranilate isomerase (N-5'-phosphoribosyl) trpF                   |              | Amino Acid Metabolism                     | 13.010 | 12.759 | 11.047 | 13.358 | 6.06E-01 | 8.83E-04 | -0.25 | 2.31  |
| <i>lpg1304</i> | tryptophan synthetase, beta subunit                                                |              | Amino Acid Metabolism                     | 11.951 | 11.365 | 10.177 | 11.835 | 2.66E-01 | 1.43E-02 | -0.59 | 1.66  |
| <i>lpg1304</i> | tryptophan synthetase, beta subunit                                                |              | Amino Acid Metabolism                     | 11.800 | 10.718 | 9.904  | 12.083 | 2.72E-01 | 1.86E-02 | -1.08 | 2.18  |
| <i>lpg1305</i> | tryptophan synthetase (alpha chain) TrpA                                           | <i>trpA</i>  | Amino Acid Metabolism                     | 11.179 | 11.117 | 9.222  | 11.795 | 9.22E-01 | 2.60E-03 | -0.06 | 2.57  |
| <i>lpg1305</i> | tryptophan synthetase (alpha chain) TrpA                                           | <i>trpA</i>  | Amino Acid Metabolism                     | 11.178 | 10.335 | 8.717  | 11.812 | 4.02E-01 | 2.42E-03 | -0.84 | 3.10  |
| <i>lpg1306</i> | glutamyl-tRNA synthetase                                                           | <i>glnS</i>  | Amino Acid Metabolism, Translation        | 12.671 | 11.289 | 11.072 | 12.835 | 3.45E-03 | 1.60E-03 | -1.38 | 1.76  |
| <i>lpg1306</i> | glutamyl-tRNA synthetase                                                           | <i>glnS</i>  | Amino Acid Metabolism, Translation        | 12.800 | 11.276 | 10.904 | 12.837 | 2.88E-04 | 2.13E-03 | -1.52 | 1.93  |
| <i>lpg1307</i> | cysteinyl-tRNA synthetase                                                          | <i>cysS</i>  | Amino Acid Metabolism, Translation        | 12.759 | 12.077 | 11.194 | 12.975 | 2.62E-02 | 1.75E-03 | -0.68 | 1.78  |
| <i>lpg1307</i> | cysteinyl-tRNA synthetase                                                          | <i>cysS</i>  | Amino Acid Metabolism, Translation        | 12.727 | 12.066 | 10.979 | 13.200 | 3.29E-02 | 3.74E-04 | -0.66 | 2.22  |
| <i>lpg1308</i> | sulfatase domain protein                                                           |              | Named proteins of general function        | 10.229 | 10.333 | 10.379 | 10.202 | 7.05E-01 | 6.26E-01 | 0.10  | -0.18 |
| <i>lpg1308</i> | sulfatase domain protein                                                           |              | Named proteins of general function        | 9.083  | 10.151 | 10.363 | 10.320 | 3.59E-01 | 8.87E-01 | 1.07  | -0.04 |
| <i>lpg1309</i> | small ORF (104aa)                                                                  |              | ORFs of unknown function (unique)         | 10.771 | 10.517 | 12.429 | 10.269 | 7.00E-01 | 3.35E-02 | -0.25 | -2.16 |
| <i>lpg1309</i> | small ORF (104aa)                                                                  |              | ORFs of unknown function (unique)         | 10.790 | 13.035 | 12.444 | 13.235 | 2.92E-03 | 2.86E-01 | 2.25  | 0.79  |
| <i>lpg1310</i> | small ORF (97aa)                                                                   |              | ORFs of unknown function (unique)         | 7.657  | 8.170  | 7.141  | 8.217  | 6.48E-01 | 5.54E-01 | 0.51  | 1.08  |
| <i>lpg1310</i> | small ORF (97aa)                                                                   |              | ORFs of unknown function (unique)         | 6.255  | 8.083  | 6.348  | 9.063  | 2.71E-01 | 1.37E-01 | 1.83  | 2.71  |
| <i>lpg1311</i> | small ORF (89aa)                                                                   |              | ORFs of unknown function (unique)         | 9.221  | 11.499 | 10.574 | 11.194 | 2.18E-02 | 3.68E-01 | 2.28  | 0.62  |
| <i>lpg1311</i> | small ORF (89aa)                                                                   |              | ORFs of unknown function (unique)         | 9.322  | 11.451 | 10.394 | 11.092 | 3.13E-02 | 3.47E-01 | 2.13  | 0.70  |
| <i>lpg1312</i> | erythrocyte membrane-associated antigen                                            | <i>LegC1</i> | Named proteins of general function        | 7.503  | 7.647  | 7.270  | 6.725  | 7.13E-01 | 6.73E-01 | 0.14  | -0.54 |
| <i>lpg1312</i> | erythrocyte membrane-associated antigen                                            | <i>LegC1</i> | Named proteins of general function        | 7.502  | 8.949  | 6.832  | 7.413  | 3.74E-01 | 8.21E-01 | 1.45  | 0.58  |
| <i>lpg1313</i> | transposase                                                                        |              | Viral functions / Phage / Transposases    | 9.382  | 8.352  | 8.472  | 7.713  | 1.40E-01 | 1.28E-01 | -1.03 | -0.76 |
| <i>lpg1313</i> | transposase                                                                        |              | Viral functions / Phage / Transposases    | 9.155  | 7.922  | 9.302  | 9.206  | 1.26E-01 | 8.59E-01 | -1.23 | -0.10 |
| <i>lpg1314</i> | hypothetical (endonuclease?)                                                       |              | Unknown / hypothetical proteins           | 10.785 | 9.812  | 10.666 | 10.005 | 4.15E-02 | 5.42E-02 | -0.97 | -0.66 |
| <i>lpg1314</i> | hypothetical (endonuclease?)                                                       |              | Unknown / hypothetical proteins           | 10.969 | 10.791 | 10.676 | 10.525 | 8.25E-01 | 7.72E-01 | -0.18 | -0.15 |
| <i>lpg1315</i> | transposase (ISSod6)                                                               |              | Viral functions / Phage / Transposases    | 10.562 | 11.063 | 11.316 | 11.287 | 4.32E-01 | 9.73E-01 | 0.50  | -0.03 |
| <i>lpg1315</i> | transposase (ISSod6)                                                               |              | Viral functions / Phage / Transposases    | 10.095 | 11.047 | 10.027 | 11.194 | 1.31E-01 | 3.15E-01 | 0.95  | 1.17  |
| <i>lpg1316</i> | ORF                                                                                |              | ORFs of unknown function (unique)         | 10.842 | 9.370  | 11.264 | 9.767  | 3.62E-02 | 1.52E-02 | -1.47 | -1.50 |
| <i>lpg1316</i> | ORF                                                                                |              | ORFs of unknown function (unique)         | 10.829 | 10.170 | 11.171 | 10.113 | 2.08E-01 | 3.01E-02 | -0.66 | -1.06 |
| <i>lpg1317</i> | ORF                                                                                |              | ORFs of unknown function (unique)         | 10.358 | 10.685 | 11.584 | 10.582 | 5.90E-01 | 4.41E-02 | 0.33  | -1.00 |
| <i>lpg1317</i> | ORF                                                                                |              | ORFs of unknown function (unique)         | 10.456 | 10.926 | 11.648 | 10.844 | 3.95E-01 | 7.24E-02 | 0.47  | -0.80 |
| <i>lpg1318</i> | ORF                                                                                |              | ORFs of unknown function (unique)         | 9.443  | 8.370  | 11.758 | 5.653  | 2.10E-01 | 1.80E-03 | -1.07 | -6.10 |
| <i>lpg1318</i> | ORF                                                                                |              | ORFs of unknown function (unique)         | 8.828  | 8.207  | 10.941 | 7.676  | 5.61E-01 | 4.41E-02 | -0.62 | -3.27 |
| <i>lpg1319</i> | type II secretory pathway protein E (ATPase EpsE)                                  |              | Protein fate / hydrolases / secretion     | 10.078 | 9.251  | 9.570  | 10.258 | 4.70E-01 | 2.03E-01 | -0.83 | 0.69  |
| <i>lpg1319</i> | type II secretory pathway protein E (ATPase EpsE)                                  |              | Protein fate / hydrolases / secretion     | 10.540 | 7.886  | 9.209  | 10.381 | 9.92E-03 | 1.42E-01 | -2.65 | 1.17  |
| <i>lpg1320</i> | type II protein secretion LspD (general secretion pathway D transmembrane protein) |              | Protein fate / hydrolases / secretion     | 10.334 | 9.104  | 8.916  | 9.314  | 6.04E-02 | 5.31E-01 | -1.23 | 0.40  |
| <i>lpg1320</i> | type II protein secretion LspD (general secretion pathway D transmembrane protein) |              | Protein fate / hydrolases / secretion     | 10.497 | 7.964  | 8.192  | 8.865  | 3.86E-02 | 5.83E-01 | -2.53 | 0.67  |
| <i>lpg1321</i> | oxidoreductase (dehydrogenase)                                                     |              | Named proteins of general function        | 9.731  | 9.764  | 9.517  | 8.370  | 9.42E-01 | 2.62E-01 | 0.03  | -1.15 |
| <i>lpg1321</i> | oxidoreductase (dehydrogenase)                                                     |              | Named proteins of general function        | 9.907  | 10.713 | 9.597  | 9.684  | 4.29E-01 | 9.54E-01 | 0.81  | 0.09  |
| <i>lpg1322</i> | adenylate cyclase 1 protein                                                        | <i>cyaA</i>  | Nucleotide Metabolism                     | 7.998  | 8.470  | 8.246  | 7.774  | 5.82E-01 | 5.02E-01 | 0.47  | -0.47 |
| <i>lpg1322</i> | adenylate cyclase 1 protein                                                        | <i>cyaA</i>  | Nucleotide Metabolism                     | 7.574  | 6.262  | 7.437  | 7.989  | 4.67E-01 | 8.12E-01 | -1.31 | 0.55  |
| <i>lpg1323</i> | drug resistance transporter, Bcr/CflA (MFS transporter)                            |              | Transport and binding                     | 8.895  | 8.445  | 9.457  | 8.213  | 5.95E-01 | 1.46E-01 | -0.45 | -1.24 |
| <i>lpg1323</i> | drug resistance transporter, Bcr/CflA (MFS transporter)                            |              | Transport and binding                     | 9.322  | 9.623  | 10.032 | 8.997  | 7.35E-01 | 8.94E-02 | 0.30  | -1.04 |

|                |                                                                          |             |        |        |        |        |          |          |       |       |
|----------------|--------------------------------------------------------------------------|-------------|--------|--------|--------|--------|----------|----------|-------|-------|
| <i>lpg1324</i> | multidrug resistance efflux pump (permease MDR) (major facilitator f     |             | 8.920  | 8.328  | 9.189  | 8.677  | 1.52E-01 | 4.37E-01 | -0.59 | -0.51 |
| <i>lpg1324</i> | multidrug resistance efflux pump (permease MDR) (major facilitator f     |             | 8.911  | 9.207  | 9.483  | 9.482  | 7.02E-01 | 9.97E-01 | 0.30  | 0.00  |
| <i>lpg1325</i> | siderophore biosynthetic enzyme FrgA                                     | <i>frgA</i> | 8.655  | 8.322  | 8.751  | 9.592  | 4.96E-01 | 1.03E-01 | -0.33 | 0.84  |
| <i>lpg1325</i> | siderophore biosynthetic enzyme FrgA                                     | <i>frgA</i> | 8.815  | 8.298  | 8.548  | 9.825  | 4.44E-01 | 3.07E-02 | -0.52 | 1.28  |
| <i>lpg1326</i> | conserved hypothetical protein                                           |             | 8.092  | 9.882  | 8.205  | 8.949  | 5.09E-02 | 3.71E-01 | 1.79  | 0.74  |
| <i>lpg1326</i> | conserved hypothetical protein                                           |             | 8.333  | 9.119  | 7.394  | 8.891  | 5.04E-02 | 6.51E-02 | 0.79  | 1.50  |
| <i>lpg1327</i> | small ORF (104aa) hypothetical                                           |             | 9.089  | 8.941  | 9.549  | 7.781  | 7.05E-01 | 9.26E-02 | -0.15 | -1.77 |
| <i>lpg1327</i> | small ORF (104aa) hypothetical                                           |             | 8.865  | 8.845  | 9.322  | 7.684  | 9.51E-01 | 2.14E-01 | -0.02 | -1.64 |
| <i>lpg1328</i> | conserved repeat domain protein                                          | <i>legT</i> | 9.625  | 8.365  | 8.710  | 8.499  | 7.54E-03 | 8.37E-01 | -1.26 | -0.21 |
| <i>lpg1328</i> | conserved repeat domain protein                                          | <i>legT</i> | 9.554  | 8.054  | 8.294  | 8.721  | 3.75E-01 | 7.73E-01 | -1.50 | 0.43  |
| <i>lpg1329</i> | hypothetical protein                                                     |             | 10.218 | 7.746  | 8.665  | 8.512  | 1.37E-02 | 8.53E-01 | -2.47 | -0.15 |
| <i>lpg1329</i> | hypothetical protein                                                     |             | 10.191 | 8.564  | 8.525  | 8.584  | 9.09E-03 | 9.53E-01 | -1.63 | 0.06  |
| <i>lpg1330</i> | tRNA-Met                                                                 |             | 10.475 | 10.403 | 10.447 | 10.875 | 7.86E-01 | 2.12E-01 | -0.07 | 0.43  |
| <i>lpg1330</i> | tRNA-Met                                                                 |             | 10.317 | 10.505 | 10.401 | 11.082 | 6.80E-01 | 1.53E-02 | 0.19  | 0.68  |
| <i>lpg1331</i> | protease DO (periplasmic serine endoprotease)                            | <i>htrA</i> | 12.987 | 12.959 | 11.655 | 13.043 | 9.27E-01 | 5.27E-02 | -0.03 | 1.39  |
| <i>lpg1331</i> | protease DO (periplasmic serine endoprotease)                            | <i>htrA</i> | 12.833 | 12.890 | 11.669 | 13.152 | 8.88E-01 | 2.41E-02 | 0.06  | 1.48  |
| <i>lpg1332</i> | hypothetical (inner membrane protein)                                    |             | 11.901 | 10.663 | 11.272 | 10.658 | 1.18E-03 | 1.82E-01 | -1.24 | -0.61 |
| <i>lpg1332</i> | hypothetical (inner membrane protein)                                    |             | 11.930 | 11.297 | 11.686 | 11.176 | 3.04E-01 | 3.06E-01 | -0.63 | -0.51 |
| <i>lpg1333</i> | ribosomal large subunit pseudouridine synthase D, RluD                   | <i>rluD</i> | 10.870 | 10.103 | 10.688 | 10.689 | 1.18E-01 | 9.99E-01 | -0.77 | 0.00  |
| <i>lpg1333</i> | ribosomal large subunit pseudouridine synthase D, RluD                   | <i>rluD</i> | 11.122 | 10.719 | 10.758 | 11.587 | 2.92E-01 | 6.34E-02 | -0.40 | 0.83  |
| <i>lpg1334</i> | tRNA thiotransferase (tRNA-i(6) A37 modification enzyme MiaB)            |             | 12.714 | 13.662 | 12.196 | 13.183 | 1.47E-04 | 3.56E-03 | 0.95  | 0.99  |
| <i>lpg1334</i> | tRNA thiotransferase (tRNA-i(6) A37 modification enzyme MiaB)            |             | 12.715 | 13.731 | 12.260 | 13.268 | 2.26E-04 | 1.46E-03 | 1.02  | 1.01  |
| <i>lpg1335</i> | major facilitator family transporter (permease) (multidrug efflux transp |             | 12.695 | 12.814 | 12.321 | 11.977 | 8.09E-01 | 2.00E-01 | 0.12  | -0.34 |
| <i>lpg1335</i> | major facilitator family transporter (permease) (multidrug efflux transp |             | 12.687 | 13.627 | 12.363 | 12.446 | 1.24E-02 | 7.95E-01 | 0.94  | 0.08  |
| <i>lpg1336</i> | enhanced entry protein EnhA                                              | <i>enhA</i> | 10.357 | 10.640 | 13.683 | 9.555  | 8.05E-01 | 1.04E-02 | 0.25  | -4.13 |
| <i>lpg1336</i> | enhanced entry protein EnhA                                              | <i>enhA</i> | 9.994  | 9.924  | 12.922 | 9.136  | 9.32E-01 | 4.69E-02 | -0.07 | -3.79 |
| <i>lpg1337</i> | flagellar protein FlIS                                                   | <i>flIS</i> | 9.464  | 7.783  | 11.798 | 7.926  | 1.02E-01 | 5.49E-02 | -1.68 | -3.87 |
| <i>lpg1337</i> | flagellar protein FlIS                                                   | <i>flIS</i> | 9.352  | 8.096  | 11.736 | 8.714  | 1.40E-01 | 6.33E-02 | -1.26 | -3.02 |
| <i>lpg1338</i> | flagellar hook associated protein 2 (flagellar cap protein F             | <i>flID</i> | 10.407 | 10.334 | 13.927 | 10.099 | 9.36E-01 | 1.27E-03 | -0.07 | -3.83 |
| <i>lpg1338</i> | flagellar hook associated protein 2 (flagellar cap protein F             | <i>flID</i> | 10.473 | 11.365 | 13.936 | 11.742 | 3.27E-01 | 2.93E-02 | 0.89  | -2.19 |
| <i>lpg1339</i> | small ORF (93aa)                                                         |             | 10.637 | 10.420 | 13.593 | 10.987 | 8.27E-01 | 2.05E-02 | -0.22 | -2.61 |
| <i>lpg1339</i> | small ORF (93aa)                                                         |             | 10.534 | 10.115 | 13.510 | 10.960 | 7.42E-01 | 2.39E-02 | -0.42 | -2.55 |
| <i>lpg1340</i> | flagellin                                                                | <i>flIC</i> | 11.389 | 13.133 | 14.606 | 12.293 | 7.02E-02 | 4.55E-02 | 1.74  | -2.31 |
| <i>lpg1340</i> | flagellin                                                                | <i>flIC</i> | 11.154 | 13.264 | 14.511 | 12.632 | 5.23E-02 | 1.35E-01 | 2.11  | -1.88 |
| <i>lpg1341</i> | acetyl CoA carboxylase, carboxyltransferase, beta subun                  | <i>accD</i> | 10.887 | 11.210 | 10.349 | 11.632 | 4.40E-01 | 2.03E-02 | 0.32  | 1.28  |
| <i>lpg1341</i> | acetyl CoA carboxylase, carboxyltransferase, beta subun                  | <i>accD</i> | 10.576 | 11.782 | 10.499 | 12.070 | 3.84E-02 | 1.20E-02 | 1.21  | 1.57  |
| <i>lpg1342</i> | FolC bifunctional protein (folylpolyglutamate synthase/di                | <i>folC</i> | 11.833 | 10.541 | 10.068 | 10.546 | 1.14E-01 | 5.90E-01 | -1.29 | 0.48  |
| <i>lpg1342</i> | FolC bifunctional protein (folylpolyglutamate synthase/di                | <i>folC</i> | 11.811 | 10.386 | 8.872  | 10.385 | 5.65E-02 | 1.31E-01 | -1.42 | 1.51  |
| <i>lpg1343</i> | ORF                                                                      |             | 10.630 | 11.861 | 10.965 | 11.320 | 3.95E-02 | 2.75E-01 | 1.23  | 0.36  |
| <i>lpg1343</i> | ORF                                                                      |             | 10.365 | 11.677 | 10.795 | 11.179 | 1.48E-02 | 2.58E-01 | 1.31  | 0.38  |
| <i>lpg1344</i> | colicin V (bacteriocin) production protein (membrane prot                | <i>dedE</i> | 11.455 | 10.595 | 10.624 | 9.262  | 4.44E-02 | 2.19E-03 | -0.86 | -1.36 |
| <i>lpg1344</i> | colicin V (bacteriocin) production protein (membrane prot                | <i>dedE</i> | 11.398 | 10.753 | 10.552 | 9.838  | 1.77E-01 | 5.61E-02 | -0.65 | -0.71 |
| <i>lpg1345</i> | nicotinate-nucleotide adenyltransferase (cytidyltransferase)             |             | 10.849 | 9.649  | 9.486  | 10.134 | 1.12E-03 | 2.05E-01 | -1.20 | 0.65  |
| <i>lpg1345</i> | nicotinate-nucleotide adenyltransferase (cytidyltransferase)             |             | 10.668 | 9.471  | 9.296  | 10.222 | 9.92E-03 | 2.22E-01 | -1.20 | 0.93  |
| <i>lpg1346</i> | DNA polymerase III, delta subunit                                        | <i>holA</i> | 11.599 | 10.059 | 9.625  | 11.933 | 1.15E-02 | 5.13E-03 | -1.54 | 2.31  |
| <i>lpg1346</i> | DNA polymerase III, delta subunit                                        | <i>holA</i> | 11.592 | 11.768 | 9.748  | 12.770 | 7.16E-01 | 1.59E-03 | 0.18  | 3.02  |
| <i>lpg1347</i> | rare lipoprotein B                                                       |             | 10.868 | 10.635 | 9.494  | 10.566 | 7.93E-01 | 9.06E-02 | -0.23 | 1.07  |
| <i>lpg1347</i> | rare lipoprotein B                                                       |             | 10.911 | 11.901 | 9.499  | 11.649 | 3.69E-01 | 5.06E-02 | 0.99  | 2.15  |
| <i>lpg1348</i> | leucyl tRNA synthetase                                                   | <i>leuS</i> | 12.687 | 12.817 | 10.254 | 13.541 | 8.34E-01 | 1.52E-03 | 0.13  | 3.29  |
| <i>lpg1348</i> | leucyl tRNA synthetase                                                   | <i>leuS</i> | 12.845 | 12.806 | 10.187 | 13.524 | 9.45E-01 | 1.28E-03 | -0.04 | 3.34  |
| <i>lpg1349</i> | apolipoprotein N-acyltransferase                                         | <i>cutE</i> | 11.138 | 10.878 | 9.254  | 9.863  | 6.65E-01 | 3.20E-01 | -0.26 | 0.61  |
| <i>lpg1349</i> | apolipoprotein N-acyltransferase                                         | <i>cutE</i> | 11.389 | 10.659 | 9.221  | 10.202 | 9.81E-02 | 7.39E-02 | -0.73 | 0.98  |
| <i>lpg1350</i> | L-lysine dehydrogenase (dehydrogenase) (saccharopine dehydrogen          |             | 13.893 | 14.022 | 12.010 | 13.591 | 8.07E-01 | 1.12E-02 | 0.13  | 1.58  |
| <i>lpg1350</i> | L-lysine dehydrogenase (dehydrogenase) (saccharopine dehydrogen          |             | 13.983 | 14.015 | 11.902 | 13.563 | 9.53E-01 | 1.13E-02 | 0.03  | 1.66  |
| <i>lpg1351</i> | piperidine-6-carboxylate dehydrogenase (aldehyde dehydrogenase)          |             | 11.521 | 12.309 | 10.385 | 11.656 | 9.94E-02 | 5.65E-02 | 0.79  | 1.27  |
| <i>lpg1351</i> | piperidine-6-carboxylate dehydrogenase (aldehyde dehydrogenase)          |             | 11.563 | 12.463 | 10.324 | 11.689 | 4.20E-02 | 3.10E-02 | 0.90  | 1.37  |
| <i>lpg1352</i> | 3-hydroxyacyl CoA dehydrogenase oxidoreductase prote                     | <i>fadB</i> | 13.891 | 14.489 | 13.364 | 13.491 | 2.03E-02 | 5.68E-01 | 0.60  | 0.13  |
| <i>lpg1352</i> | 3-hydroxyacyl CoA dehydrogenase oxidoreductase prote                     | <i>fadB</i> | 14.224 | 14.499 | 13.410 | 13.635 | 1.96E-01 | 3.85E-01 | 0.27  | 0.22  |
| <i>lpg1353</i> | 3-ketoacyl CoA thiolase (thiolase)                                       | <i>fadA</i> | 12.414 | 13.444 | 12.660 | 12.308 | 4.04E-03 | 1.23E-01 | 1.03  | -0.35 |
| <i>lpg1353</i> | 3-ketoacyl CoA thiolase (thiolase)                                       | <i>fadA</i> | 12.491 | 13.379 | 12.655 | 12.306 | 5.88E-03 | 1.09E-01 | 0.89  | -0.35 |
| <i>lpg1354</i> | ORF                                                                      |             | 9.526  | 8.997  | 10.645 | 8.394  | 1.24E-01 | 1.69E-02 | -0.53 | -2.25 |
| <i>lpg1354</i> | ORF                                                                      |             | 9.748  | 9.637  | 10.294 | 9.311  | 7.53E-01 | 1.19E-01 | -0.11 | -0.98 |
| <i>lpg1355</i> | SidG, LepC, Vng0394c                                                     | <i>sidG</i> | 8.334  | 6.635  | 12.875 | 7.360  | 1.59E-01 | 6.42E-04 | -1.70 | -5.52 |
| <i>lpg1355</i> | SidG, LepC, Vng0394c                                                     | <i>sidG</i> | 8.376  | 7.823  | 11.727 | 7.581  | 5.71E-01 | 1.88E-02 | -0.55 | -4.15 |

|                |                                                                            |             |                                           |        |        |        |        |          |          |       |       |
|----------------|----------------------------------------------------------------------------|-------------|-------------------------------------------|--------|--------|--------|--------|----------|----------|-------|-------|
| <i>lpg1356</i> | TPR repeat protein (enhanced entry protein EnhC)                           |             | Toxin production / other pathogen func    | 10.860 | 10.938 | 14.027 | 11.212 | 9.03E-01 | 3.98E-03 | 0.08  | -2.82 |
| <i>lpg1356</i> | TPR repeat protein (enhanced entry protein EnhC)                           |             | Toxin production / other pathogen func    | 10.975 | 11.042 | 14.025 | 11.282 | 9.12E-01 | 3.28E-03 | 0.07  | -2.74 |
| <i>lpg1357</i> | inner membrane protein PLUS sensory box protein LssE                       |             | Signal transduction / other regulatory f  | 7.935  | 9.219  | 9.995  | 8.212  | 1.95E-01 | 1.13E-01 | 1.28  | -1.78 |
| <i>lpg1357</i> | inner membrane protein PLUS sensory box protein LssE                       |             | Signal transduction / other regulatory f  | 9.104  | 8.478  | 10.066 | 8.306  | 4.69E-01 | 3.10E-02 | -0.63 | -1.76 |
| <i>lpg1358</i> | general secretion pathway protein LspK                                     | <i>xcpX</i> | Protein fate / hydrolases / secretion     | 10.764 | 9.996  | 9.851  | 9.856  | 1.10E-02 | 9.92E-01 | -0.77 | 0.00  |
| <i>lpg1358</i> | general secretion pathway protein LspK                                     | <i>xcpX</i> | Protein fate / hydrolases / secretion     | 10.553 | 10.188 | 9.753  | 10.525 | 2.60E-01 | 9.60E-02 | -0.36 | 0.77  |
| <i>lpg1359</i> | general secretion pathway protein LspJ                                     | <i>xcpW</i> | Protein fate / hydrolases / secretion     | 9.176  | 8.896  | 8.815  | 6.786  | 4.60E-01 | 1.38E-01 | -0.28 | -2.03 |
| <i>lpg1359</i> | general secretion pathway protein LspJ                                     | <i>xcpW</i> | Protein fate / hydrolases / secretion     | 9.393  | 9.062  | 9.468  | 8.422  | 3.53E-01 | 2.22E-01 | -0.33 | -1.05 |
| <i>lpg1360</i> | general secretion pathway protein LspI                                     |             | Protein fate / hydrolases / secretion     | 10.778 | 10.412 | 10.587 | 10.528 | 3.73E-01 | 8.56E-01 | -0.37 | -0.06 |
| <i>lpg1360</i> | general secretion pathway protein LspI                                     |             | Protein fate / hydrolases / secretion     | 10.852 | 10.252 | 10.460 | 10.429 | 1.23E-01 | 9.13E-01 | -0.60 | -0.03 |
| <i>lpg1361</i> | general secretion pathway protein LspH                                     | <i>xcpU</i> | Protein fate / hydrolases / secretion     | 10.976 | 11.169 | 10.559 | 10.878 | 6.37E-01 | 6.00E-01 | 0.19  | 0.32  |
| <i>lpg1361</i> | general secretion pathway protein LspH                                     | <i>xcpU</i> | Protein fate / hydrolases / secretion     | 10.958 | 11.666 | 10.704 | 11.153 | 3.11E-01 | 6.35E-01 | 0.71  | 0.45  |
| <i>lpg1362</i> | type II protein secretion LspG (general secretion pathway <i>gspG</i> )    |             | Protein fate / hydrolases / secretion     | 13.045 | 14.039 | 12.918 | 13.394 | 1.22E-03 | 6.26E-02 | 0.99  | 0.48  |
| <i>lpg1362</i> | type II protein secretion LspG (general secretion pathway <i>gspG</i> )    |             | Protein fate / hydrolases / secretion     | 12.998 | 14.045 | 12.790 | 13.355 | 1.37E-03 | 4.91E-02 | 1.05  | 0.56  |
| <i>lpg1363</i> | type II protein secretion LspF (general secretion pathway <i>gspF</i> )    |             | Protein fate / hydrolases / secretion     | 11.520 | 11.003 | 9.503  | 11.447 | 2.78E-01 | 3.76E-03 | -0.52 | 1.94  |
| <i>lpg1363</i> | type II protein secretion LspF (general secretion pathway <i>gspF</i> )    |             | Protein fate / hydrolases / secretion     | 10.915 | 11.406 | 9.389  | 11.390 | 4.18E-01 | 3.36E-03 | 0.49  | 2.00  |
| <i>lpg1364</i> | glutamine synthetase, type I (glutamate-ammonia ligase) <i>glnA</i>        |             | Amino Acid Metabolism, Metabolism o       | 12.276 | 14.818 | 11.320 | 13.816 | 4.00E-04 | 6.29E-03 | 2.54  | 2.50  |
| <i>lpg1364</i> | glutamine synthetase, type I (glutamate-ammonia ligase) <i>glnA</i>        |             | Amino Acid Metabolism, Metabolism o       | 12.175 | 13.989 | 11.005 | 14.084 | 8.20E-02 | 5.08E-04 | 1.81  | 3.08  |
| <i>lpg1365</i> | hypothetical                                                               |             | Unknown / hypothetical proteins           | 13.557 | 12.784 | 12.148 | 12.773 | 2.78E-02 | 7.43E-02 | -0.77 | 0.63  |
| <i>lpg1365</i> | hypothetical                                                               |             | Unknown / hypothetical proteins           | 13.473 | 12.752 | 12.119 | 12.771 | 4.98E-02 | 7.73E-02 | -0.72 | 0.65  |
| <i>lpg1366</i> | hypothetical (cytoplasmic protein) (highly similar to unknown protein Y    |             | Named proteins of general function        | 8.205  | 9.622  | 9.493  | 9.516  | 8.80E-02 | 9.53E-01 | 1.42  | 0.02  |
| <i>lpg1366</i> | hypothetical (cytoplasmic protein) (highly similar to unknown protein Y    |             | Named proteins of general function        | 8.733  | 10.095 | 9.791  | 10.092 | 4.12E-02 | 6.07E-01 | 1.36  | 0.30  |
| <i>lpg1367</i> | 1-aminocyclopropane-1-carboxylate deaminase                                |             | Carbohydrate Metabolism                   | 10.608 | 9.378  | 10.978 | 9.825  | 4.24E-04 | 5.14E-03 | -1.23 | -1.15 |
| <i>lpg1367</i> | 1-aminocyclopropane-1-carboxylate deaminase                                |             | Carbohydrate Metabolism                   | 10.595 | 9.705  | 10.951 | 10.113 | 1.15E-01 | 3.72E-02 | -0.89 | -0.84 |
| <i>lpg1368</i> | ORF                                                                        |             | ORFs of unknown function (unique)         | 9.821  | 9.950  | 14.097 | 8.831  | 9.04E-01 | 1.50E-03 | 0.13  | -5.27 |
| <i>lpg1368</i> | ORF                                                                        |             | ORFs of unknown function (unique)         | 10.141 | 10.188 | 14.123 | 9.547  | 9.62E-01 | 1.06E-03 | 0.05  | -4.58 |
| <i>lpg1369</i> | chaperone Hsp90 HtpG (heat shock protein)                                  | <i>htpG</i> | Detoxification / adaptation, Protein fate | 11.965 | 11.690 | 12.666 | 11.939 | 4.17E-01 | 4.47E-02 | -0.28 | -0.73 |
| <i>lpg1369</i> | chaperone Hsp90 HtpG (heat shock protein)                                  | <i>htpG</i> | Detoxification / adaptation, Protein fate | 11.938 | 11.724 | 12.699 | 12.130 | 5.40E-01 | 2.58E-02 | -0.21 | -0.57 |
| <i>lpg1370</i> | small ORF (98aa) DNA binding protein Fis (recombination)                   | <i>fis</i>  | Transcription factors / DNA binding prc   | 13.971 | 12.987 | 13.508 | 10.744 | 1.73E-02 | 1.40E-05 | -0.98 | -2.76 |
| <i>lpg1370</i> | small ORF (98aa) DNA binding protein Fis (recombination)                   | <i>fis</i>  | Transcription factors / DNA binding prc   | 13.950 | 12.938 | 13.437 | 10.830 | 1.95E-02 | 4.11E-05 | -1.01 | -2.61 |
| <i>lpg1371</i> | lipid A disaccharide synthase                                              | <i>lpxB</i> | Metabolism of Complex Carbohydrate:       | 10.876 | 10.350 | 12.172 | 10.382 | 5.82E-02 | 9.99E-06 | -0.53 | -1.79 |
| <i>lpg1371</i> | lipid A disaccharide synthase                                              | <i>lpxB</i> | Metabolism of Complex Carbohydrate:       | 10.858 | 10.215 | 11.511 | 10.264 | 7.95E-02 | 1.01E-03 | -0.64 | -1.25 |
| <i>lpg1372</i> | oxidoreductase (NADH dependent dehydrogenase) (myo-inositol-2-di           |             | Carbohydrate Metabolism, Metabolism       | 10.617 | 11.576 | 10.391 | 11.243 | 2.19E-01 | 1.70E-02 | 0.96  | 0.85  |
| <i>lpg1372</i> | oxidoreductase (NADH dependent dehydrogenase) (myo-inositol-2-di           |             | Carbohydrate Metabolism, Metabolism       | 10.965 | 11.523 | 9.965  | 10.899 | 2.83E-01 | 1.00E-01 | 0.56  | 0.93  |
| <i>lpg1373</i> | ribonuclease HII                                                           | <i>mhB</i>  | DNA/RNA degradation / restriction         | 10.042 | 8.229  | 8.804  | 9.490  | 4.01E-02 | 3.34E-01 | -1.81 | 0.69  |
| <i>lpg1373</i> | ribonuclease HII                                                           | <i>mhB</i>  | DNA/RNA degradation / restriction         | 9.726  | 7.892  | 8.678  | 9.676  | 4.29E-02 | 1.62E-01 | -1.83 | 1.00  |
| <i>lpg1374</i> | rod shape determining protein RodA                                         | <i>rodA</i> | Cell envelope synthesis                   | 10.777 | 10.076 | 10.643 | 7.977  | 2.40E-01 | 2.89E-04 | -0.70 | -2.67 |
| <i>lpg1374</i> | rod shape determining protein RodA                                         | <i>rodA</i> | Cell envelope synthesis                   | 10.728 | 10.472 | 10.863 | 9.295  | 6.79E-01 | 2.65E-02 | -0.26 | -1.57 |
| <i>lpg1375</i> | penicillin binding protein 2 (cell elongation, e phase; pept <i>pbpA</i> ) |             | Cell envelope synthesis, Metabolism o     | 10.176 | 9.056  | 9.275  | 8.436  | 1.38E-01 | 2.08E-01 | -1.12 | -0.84 |
| <i>lpg1375</i> | penicillin binding protein 2 (cell elongation, e phase; pept <i>pbpA</i> ) |             | Cell envelope synthesis, Metabolism o     | 10.239 | 8.479  | 8.937  | 9.421  | 1.03E-01 | 3.99E-01 | -1.76 | 0.48  |
| <i>lpg1376</i> | hypothetical COG1576                                                       |             | Unknown / hypothetical proteins           | 10.443 | 8.268  | 10.251 | 9.649  | 7.63E-05 | 1.99E-01 | -2.18 | -0.60 |
| <i>lpg1376</i> | hypothetical COG1576                                                       |             | Unknown / hypothetical proteins           | 10.315 | 7.573  | 10.031 | 10.322 | 2.27E-02 | 5.82E-01 | -2.74 | 0.29  |
| <i>lpg1377</i> | hypothetical COG0799                                                       |             | Unknown / hypothetical proteins           | 12.296 | 11.002 | 14.121 | 11.201 | 1.01E-01 | 1.09E-04 | -1.29 | -2.92 |
| <i>lpg1377</i> | hypothetical COG0799                                                       |             | Unknown / hypothetical proteins           | 12.357 | 9.979  | 11.671 | 11.039 | 6.82E-02 | 2.95E-01 | -2.38 | -0.63 |
| <i>lpg1378</i> | proton/peptide symporter (POT) family protein (proton/oligopeptide tr      |             | Transport and binding                     | 11.874 | 12.786 | 12.186 | 10.238 | 5.44E-02 | 5.75E-03 | 0.91  | -1.95 |
| <i>lpg1378</i> | proton/peptide symporter (POT) family protein (proton/oligopeptide tr      |             | Transport and binding                     | 11.743 | 12.999 | 12.124 | 11.209 | 5.80E-02 | 1.58E-01 | 1.26  | -0.92 |
| <i>lpg1379</i> | urocanate hydratase (urocanase)                                            |             | Amino Acid Metabolism                     | 11.643 | 11.886 | 11.193 | 11.716 | 4.28E-01 | 1.27E-01 | 0.24  | 0.52  |
| <i>lpg1379</i> | urocanate hydratase (urocanase)                                            |             | Amino Acid Metabolism                     | 11.805 | 12.233 | 11.148 | 11.834 | 3.43E-01 | 1.10E-01 | 0.43  | 0.69  |
| <i>lpg1380</i> | histidine ammonia lyase                                                    |             | Amino Acid Metabolism, Energy Metab       | 11.788 | 12.417 | 12.222 | 12.701 | 2.47E-01 | 2.74E-01 | 0.63  | 0.48  |
| <i>lpg1380</i> | histidine ammonia lyase                                                    |             | Amino Acid Metabolism, Energy Metab       | 11.823 | 12.440 | 12.177 | 12.675 | 1.76E-01 | 2.69E-01 | 0.62  | 0.50  |
| <i>lpg1381</i> | aldehyde dehydrogenase (NAD dependent) (coniferyl aldehyde dehyd           |             | Named proteins of general function        | 11.780 | 11.753 | 11.868 | 11.576 | 9.20E-01 | 2.56E-01 | -0.03 | -0.29 |
| <i>lpg1381</i> | aldehyde dehydrogenase (NAD dependent) (coniferyl aldehyde dehyd           |             | Named proteins of general function        | 11.806 | 11.699 | 11.652 | 11.478 | 6.68E-01 | 5.19E-01 | -0.11 | -0.17 |
| <i>lpg1382</i> | dehydrogenase, short chain (dhs-6C) (hydroxysteroid dehydrogenase          |             | Lipid Metabolism                          | 10.788 | 12.157 | 11.207 | 11.626 | 1.63E-04 | 5.77E-02 | 1.37  | 0.42  |
| <i>lpg1382</i> | dehydrogenase, short chain (dhs-6C) (hydroxysteroid dehydrogenase          |             | Lipid Metabolism                          | 10.642 | 12.269 | 11.100 | 11.779 | 9.33E-05 | 7.03E-03 | 1.63  | 0.68  |
| <i>lpg1383</i> | ribonuclease HI                                                            | <i>mhA</i>  | DNA/RNA degradation / restriction         | 10.115 | 11.295 | 8.900  | 10.844 | 5.91E-03 | 1.26E-02 | 1.18  | 1.94  |
| <i>lpg1383</i> | ribonuclease HI                                                            | <i>mhA</i>  | DNA/RNA degradation / restriction         | 9.159  | 11.205 | 8.835  | 10.859 | 8.59E-02 | 7.15E-03 | 2.05  | 2.02  |
| <i>lpg1384</i> | DNA polymerase III, epsilon subunit                                        | <i>dnaQ</i> | Nucleotide Metabolism, Replication an     | 10.931 | 10.750 | 9.653  | 10.634 | 8.27E-01 | 1.02E-01 | -0.18 | 0.98  |
| <i>lpg1384</i> | DNA polymerase III, epsilon subunit                                        | <i>dnaQ</i> | Nucleotide Metabolism, Replication an     | 11.101 | 11.186 | 9.478  | 10.837 | 8.67E-01 | 1.59E-02 | 0.08  | 1.36  |
| <i>lpg1385</i> | small ORF (125aa)                                                          |             | ORFs of unknown function (unique)         | 10.347 | 10.017 | 14.303 | 9.071  | 7.68E-01 | 6.83E-04 | -0.33 | -5.23 |
| <i>lpg1385</i> | small ORF (125aa)                                                          |             | ORFs of unknown function (unique)         | 10.533 | 10.096 | 14.351 | 9.281  | 6.76E-01 | 3.92E-04 | -0.44 | -5.07 |
| <i>lpg1386</i> | enhanced entry protein EnhA (ErkK/YbiS/YcfS/YnhG family protein)           |             | Toxin production / other pathogen func    | 7.949  | 7.062  | 12.642 | 7.665  | 6.16E-01 | 2.36E-03 | -0.89 | -4.98 |
| <i>lpg1386</i> | enhanced entry protein EnhA (ErkK/YbiS/YcfS/YnhG family protein)           |             | Toxin production / other pathogen func    | 8.248  | 7.556  | 12.586 | 8.555  | 6.46E-01 | 4.07E-03 | -0.69 | -4.03 |
| <i>lpg1387</i> | ORF                                                                        |             | ORFs of unknown function (unique)         | 10.644 | 10.149 | 13.364 | 9.038  | 5.03E-01 | 3.11E-04 | -0.50 | -4.33 |
| <i>lpg1387</i> | ORF                                                                        |             | ORFs of unknown function (unique)         | 10.899 | 10.910 | 13.534 | 10.187 | 9.90E-01 | 4.47E-03 | 0.01  | -3.35 |

|                |                                                                       |              |                                         |        |        |        |        |          |          |       |       |
|----------------|-----------------------------------------------------------------------|--------------|-----------------------------------------|--------|--------|--------|--------|----------|----------|-------|-------|
| <i>lpg1388</i> | hypothetical (HesB/YadR/YfhF family protein)                          |              | Named proteins of general function      | 11.429 | 10.027 | 11.002 | 9.151  | 9.54E-02 | 1.09E-02 | -1.40 | -1.85 |
| <i>lpg1388</i> | hypothetical (HesB/YadR/YfhF family protein)                          |              | Named proteins of general function      | 11.219 | 10.241 | 10.924 | 9.699  | 2.81E-01 | 5.30E-02 | -0.98 | -1.22 |
| <i>lpg1389</i> | tRNA (5 methylaminomethyl-2-thiouridylylate) methyltransferase (tRNA  |              | DNA/RNA degradation / restriction, Tr   | 11.424 | 11.116 | 10.021 | 11.249 | 2.31E-01 | 3.56E-03 | -0.31 | 1.23  |
| <i>lpg1389</i> | tRNA (5 methylaminomethyl-2-thiouridylylate) methyltransferase (tRNA  |              | DNA/RNA degradation / restriction, Tr   | 11.491 | 11.122 | 9.752  | 11.210 | 1.53E-01 | 9.79E-03 | -0.37 | 1.46  |
| <i>lpg1390</i> | small ORF (142aa)                                                     |              | ORFs of unknown function (unique)       | 11.311 | 10.756 | 10.799 | 10.490 | 1.63E-01 | 2.75E-01 | -0.55 | -0.31 |
| <i>lpg1390</i> | small ORF (142aa)                                                     |              | ORFs of unknown function (unique)       | 11.381 | 10.989 | 10.843 | 10.653 | 4.86E-01 | 7.15E-01 | -0.39 | -0.19 |
| <i>lpg1391</i> | 50S ribosomal protein L32                                             | <i>rpmF</i>  | Translation                             | 14.653 | 15.068 | 13.096 | 14.721 | 5.27E-01 | 2.06E-02 | 0.42  | 1.63  |
| <i>lpg1391</i> | 50S ribosomal protein L32                                             | <i>rpmF</i>  | Translation                             | 14.544 | 14.866 | 12.542 | 14.672 | 6.57E-01 | 1.60E-03 | 0.32  | 2.13  |
| <i>lpg1392</i> | fatty acid/phospholipid synthesis protein PlsX                        | <i>plsX</i>  | Lipid Metabolism, Metabolism of Com     | 12.840 | 11.603 | 10.804 | 12.149 | 1.79E-01 | 2.48E-01 | -1.24 | 1.35  |
| <i>lpg1392</i> | fatty acid/phospholipid synthesis protein PlsX                        | <i>plsX</i>  | Lipid Metabolism, Metabolism of Com     | 12.933 | 11.596 | 10.156 | 11.947 | 1.07E-01 | 2.59E-01 | -1.34 | 1.79  |
| <i>lpg1393</i> | 3-oxoacyl-(acyl carrier protein) synthase II FabH                     | <i>fabH</i>  | Lipid Metabolism                        | 13.920 | 13.073 | 11.389 | 13.344 | 1.54E-01 | 1.27E-02 | -0.85 | 1.95  |
| <i>lpg1393</i> | 3-oxoacyl-(acyl carrier protein) synthase II FabH                     | <i>fabH</i>  | Lipid Metabolism                        | 13.967 | 13.037 | 11.268 | 13.360 | 1.68E-01 | 1.42E-02 | -0.93 | 2.09  |
| <i>lpg1394</i> | S-malonyl transferase (malonyl CoA-acyl carrier protein transacylase) |              | Lipid Metabolism                        | 12.516 | 10.959 | 10.823 | 11.534 | 2.59E-02 | 2.59E-01 | -1.56 | 0.71  |
| <i>lpg1394</i> | S-malonyl transferase (malonyl CoA-acyl carrier protein transacylase) |              | Lipid Metabolism                        | 12.518 | 11.315 | 10.842 | 11.795 | 7.69E-02 | 1.14E-01 | -1.20 | 0.95  |
| <i>lpg1395</i> | 3-oxoacyl-(acyl carrier protein) reductase                            | <i>fabG</i>  | Lipid Metabolism                        | 9.807  | 8.700  | 10.194 | 7.555  | 2.79E-02 | 3.73E-02 | -1.11 | -2.64 |
| <i>lpg1395</i> | 3-oxoacyl-(acyl carrier protein) reductase                            | <i>fabG</i>  | Lipid Metabolism                        | 10.126 | 8.432  | 10.392 | 7.849  | 2.89E-04 | 2.68E-02 | -1.69 | -2.54 |
| <i>lpg1396</i> | acyl carrier protein (ACP)                                            | <i>acpP</i>  | Named proteins of general function      | 14.027 | 14.090 | 12.316 | 14.805 | 8.89E-01 | 1.85E-03 | 0.66  | 2.49  |
| <i>lpg1396</i> | acyl carrier protein (ACP)                                            | <i>acpP</i>  | Named proteins of general function      | 14.006 | 14.081 | 12.311 | 14.811 | 8.72E-01 | 1.10E-03 | 0.07  | 2.50  |
| <i>lpg1397</i> | beta-ketoacyl-acyl carrier protein synthase II (3-oxoacyl [           | <i>fabF1</i> | Lipid Metabolism                        | 14.892 | 13.826 | 13.298 | 14.626 | 1.68E-02 | 3.79E-03 | -1.07 | 1.33  |
| <i>lpg1397</i> | beta-ketoacyl-acyl carrier protein synthase II (3-oxoacyl [           | <i>fabF1</i> | Lipid Metabolism                        | 14.841 | 13.893 | 13.298 | 14.672 | 3.06E-02 | 5.40E-03 | -0.95 | 1.37  |
| <i>lpg1398</i> | aminodeoxychorismate lyase (thymidylate kinase?)                      |              | Named proteins of general function      | 10.913 | 6.982  | 10.698 | 9.054  | 2.70E-03 | 1.05E-02 | -3.93 | -1.64 |
| <i>lpg1398</i> | aminodeoxychorismate lyase (thymidylate kinase?)                      |              | Named proteins of general function      | 11.025 | 8.137  | 10.687 | 9.640  | 1.44E-03 | 4.00E-02 | -2.89 | -1.05 |
| <i>lpg1399</i> | thymidylate kinase (dTMP kinase)                                      |              | Nucleotide Metabolism                   | 12.088 | 10.336 | 10.715 | 12.126 | 7.27E-03 | 5.47E-02 | -1.75 | 1.41  |
| <i>lpg1399</i> | thymidylate kinase (dTMP kinase)                                      |              | Nucleotide Metabolism                   | 12.248 | 10.357 | 10.252 | 12.183 | 4.76E-04 | 8.49E-02 | -1.89 | 1.93  |
| <i>lpg1400</i> | DNA polymerase III, delta prime subunit                               | <i>holB</i>  | Nucleotide Metabolism, Replication an   | 12.185 | 10.370 | 10.730 | 11.863 | 4.08E-03 | 2.08E-02 | -1.81 | 1.13  |
| <i>lpg1400</i> | DNA polymerase III, delta prime subunit                               | <i>holB</i>  | Nucleotide Metabolism, Replication an   | 12.048 | 10.323 | 10.585 | 11.810 | 1.41E-02 | 1.37E-02 | -1.73 | 1.22  |
| <i>lpg1401</i> | type 4 fimbrial biogenesis protein PilZ                               | <i>pilZ</i>  | Transport and binding                   | 11.191 | 9.747  | 11.764 | 9.693  | 7.19E-03 | 1.62E-03 | -1.44 | -2.07 |
| <i>lpg1401</i> | type 4 fimbrial biogenesis protein PilZ                               | <i>pilZ</i>  | Transport and binding                   | 11.177 | 10.022 | 11.734 | 10.168 | 1.46E-02 | 2.93E-03 | -1.15 | -1.57 |
| <i>lpg1402</i> | deoxyribonuclease TatD                                                |              | DNA/RNA degradation / restriction       | 12.241 | 11.485 | 12.488 | 11.890 | 1.16E-03 | 1.14E-04 | -0.76 | -0.60 |
| <i>lpg1402</i> | deoxyribonuclease TatD                                                |              | DNA/RNA degradation / restriction       | 12.174 | 11.436 | 12.312 | 11.845 | 5.12E-04 | 1.07E-02 | -0.74 | -0.47 |
| <i>lpg1403</i> | hypothetical (transcriptional repressor?) (molecular chaperone?)      |              | COC Unknown / hypothetical proteins     | 12.414 | 10.693 | 11.640 | 10.935 | 5.98E-04 | 1.02E-02 | -1.72 | -0.70 |
| <i>lpg1403</i> | hypothetical (transcriptional repressor?) (molecular chaperone?)      |              | COC Unknown / hypothetical proteins     | 12.392 | 10.679 | 11.379 | 10.724 | 1.78E-03 | 1.32E-01 | -1.71 | -0.66 |
| <i>lpg1404</i> | major facilitator family transporter                                  |              | Transport and binding                   | 11.913 | 10.304 | 11.133 | 9.549  | 1.07E-02 | 5.84E-04 | -1.61 | -1.58 |
| <i>lpg1404</i> | major facilitator family transporter                                  |              | Transport and binding                   | 11.988 | 10.217 | 11.062 | 9.886  | 8.48E-04 | 8.27E-04 | -1.77 | -1.18 |
| <i>lpg1405</i> | multidrug translocase MdfA (sugar transport protein) (pro <i>cmr</i>  |              | Transport and binding                   | 11.063 | 11.116 | 11.280 | 10.674 | 8.70E-01 | 4.51E-01 | -0.05 | -0.61 |
| <i>lpg1405</i> | multidrug translocase MdfA (sugar transport protein) (pro <i>cmr</i>  |              | Transport and binding                   | 11.211 | 11.698 | 11.612 | 11.519 | 1.50E-01 | 8.64E-01 | 0.49  | -0.09 |
| <i>lpg1406</i> | glycosyltransferase (dolichol phosphate mannosyltransferase) (polyp   |              | Metabolism of Complex Carbohydrate:     | 12.689 | 9.376  | 10.321 | 8.797  | 8.50E-04 | 2.00E-01 | -3.31 | -1.52 |
| <i>lpg1406</i> | glycosyltransferase (dolichol phosphate mannosyltransferase) (polyp   |              | Metabolism of Complex Carbohydrate:     | 12.649 | 11.007 | 10.517 | 9.855  | 1.98E-01 | 6.99E-01 | -1.64 | -0.66 |
| <i>lpg1407</i> | dolichol monophosphate mannose synthase                               |              | Metabolism of Complex Carbohydrate:     | 9.757  | 7.829  | 8.975  | 7.640  | 1.46E-01 | 2.47E-01 | -1.93 | -1.33 |
| <i>lpg1407</i> | dolichol monophosphate mannose synthase                               |              | Metabolism of Complex Carbohydrate:     | 9.458  | 9.130  | 9.127  | 8.196  | 2.52E-01 | 2.08E-02 | -0.33 | -0.93 |
| <i>lpg1408</i> | choline kinase (cholinephosphate cytidyllyltransferase)               | <i>licA</i>  | Metabolism of Other Amino Acids, Met    | 11.157 | 12.394 | 10.853 | 11.222 | 4.94E-03 | 2.70E-01 | 1.24  | 0.37  |
| <i>lpg1408</i> | choline kinase (cholinephosphate cytidyllyltransferase)               | <i>licA</i>  | Metabolism of Other Amino Acids, Met    | 11.147 | 12.599 | 10.889 | 11.634 | 6.07E-03 | 1.73E-01 | 1.45  | 0.74  |
| <i>lpg1409</i> | hypothetical                                                          |              | Unknown / hypothetical proteins         | 10.854 | 11.029 | 10.824 | 10.893 | 5.24E-01 | 8.52E-01 | 0.18  | 0.07  |
| <i>lpg1409</i> | hypothetical                                                          |              | Unknown / hypothetical proteins         | 10.817 | 11.045 | 10.569 | 11.036 | 3.57E-01 | 5.74E-02 | 0.23  | 0.47  |
| <i>lpg1410</i> | transcriptional regulatory protein (lipoprotein)                      |              | Transcription factors / DNA binding prc | 11.757 | 11.577 | 10.528 | 11.414 | 8.44E-01 | 9.89E-02 | -0.18 | 0.89  |
| <i>lpg1410</i> | transcriptional regulatory protein (lipoprotein)                      |              | Transcription factors / DNA binding prc | 13.133 | 11.586 | 10.067 | 11.400 | 1.30E-02 | 1.76E-02 | -1.55 | 1.33  |
| <i>lpg1411</i> | adenylate kinase (ATP-AMP transphosphorylase)                         | <i>adK</i>   | Nucleotide Metabolism                   | 12.828 | 13.605 | 12.244 | 13.164 | 2.64E-03 | 4.01E-03 | 0.78  | 0.92  |
| <i>lpg1411</i> | adenylate kinase (ATP-AMP transphosphorylase)                         | <i>adK</i>   | Nucleotide Metabolism                   | 12.868 | 13.663 | 12.284 | 13.258 | 4.06E-03 | 1.13E-03 | 0.79  | 0.97  |
| <i>lpg1412</i> | thioredoxin                                                           | <i>trxA3</i> | Named proteins of general function      | 10.397 | 8.864  | 10.090 | 8.888  | 1.89E-02 | 6.36E-02 | -1.53 | -1.20 |
| <i>lpg1412</i> | thioredoxin                                                           | <i>trxA3</i> | Named proteins of general function      | 10.154 | 8.691  | 9.891  | 8.784  | 1.06E-01 | 6.26E-02 | -1.46 | -1.11 |
| <i>lpg1413</i> | glycerol-3-phosphate dehydrogenase                                    | <i>glpD</i>  | Metabolism of Complex Lipids            | 11.504 | 11.824 | 12.771 | 11.174 | 5.57E-01 | 9.61E-04 | 0.32  | -1.60 |
| <i>lpg1413</i> | glycerol-3-phosphate dehydrogenase                                    | <i>glpD</i>  | Metabolism of Complex Lipids            | 11.490 | 11.415 | 12.044 | 10.665 | 7.43E-01 | 5.79E-04 | -0.08 | -1.38 |
| <i>lpg1414</i> | glycerol kinase (probable carbohydrate kinase)                        |              | Metabolism of Complex Lipids            | 9.621  | 10.245 | 10.131 | 10.196 | 3.36E-01 | 9.37E-01 | 0.62  | 0.06  |
| <i>lpg1414</i> | glycerol kinase (probable carbohydrate kinase)                        |              | Metabolism of Complex Lipids            | 9.976  | 10.321 | 10.263 | 10.355 | 3.83E-01 | 8.50E-01 | 0.34  | 0.09  |
| <i>lpg1415</i> | citrate synthase                                                      | <i>gltA</i>  | Carbohydrate Metabolism                 | 11.642 | 11.496 | 13.903 | 12.292 | 8.41E-01 | 1.74E-02 | -0.15 | -1.61 |
| <i>lpg1415</i> | citrate synthase                                                      | <i>gltA</i>  | Carbohydrate Metabolism                 | 11.615 | 12.588 | 13.937 | 13.067 | 1.71E-01 | 1.55E-01 | 0.97  | -0.87 |
| <i>lpg1416</i> | purine nucleoside phosphorylase II (uridine phosphorylase Udp2)       |              | Nucleotide Metabolism                   | 12.289 | 12.473 | 11.835 | 12.179 | 6.01E-01 | 5.13E-01 | 0.18  | 0.34  |
| <i>lpg1416</i> | purine nucleoside phosphorylase II (uridine phosphorylase Udp2)       |              | Nucleotide Metabolism                   | 12.380 | 12.820 | 11.742 | 12.313 | 2.88E-01 | 4.28E-01 | 0.44  | 0.57  |
| <i>lpg1417</i> | DNA gyrase, A subunit                                                 | <i>gyrA</i>  | Replication and Repair                  | 12.951 | 13.017 | 11.658 | 12.968 | 8.76E-01 | 8.74E-04 | 0.07  | 1.31  |
| <i>lpg1417</i> | DNA gyrase, A subunit                                                 | <i>gyrA</i>  | Replication and Repair                  | 12.877 | 13.038 | 11.623 | 12.977 | 7.32E-01 | 4.87E-04 | 0.16  | 1.35  |
| <i>lpg1418</i> | 3-phosphoserine aminotransferase (phosphoserine trans <i>serC</i>     |              | Amino Acid Metabolism, Metabolism o     | 12.731 | 10.294 | 11.385 | 10.618 | 2.51E-03 | 1.97E-01 | -2.44 | -0.77 |
| <i>lpg1418</i> | 3-phosphoserine aminotransferase (phosphoserine trans <i>serC</i>     |              | Amino Acid Metabolism, Metabolism o     | 12.775 | 10.196 | 11.363 | 10.702 | 1.15E-03 | 2.44E-01 | -2.58 | -0.66 |
| <i>lpg1419</i> | 3-phosphoshikimate 1-carboxyvinyltransferase (5-enolpyruvoylshikim    |              | Amino Acid Metabolism                   | 12.200 | 10.438 | 10.180 | 12.025 | 2.99E-03 | 1.47E-02 | -1.76 | 1.85  |
| <i>lpg1419</i> | 3-phosphoshikimate 1-carboxyvinyltransferase (5-enolpyruvoylshikim    |              | Amino Acid Metabolism                   | 12.209 | 10.173 | 10.274 | 12.136 | 3.24E-03 | 1.25E-02 | -2.04 | 1.86  |

|                |                                                                                               |             |                                                  |        |        |        |        |          |          |       |       |
|----------------|-----------------------------------------------------------------------------------------------|-------------|--------------------------------------------------|--------|--------|--------|--------|----------|----------|-------|-------|
| <i>lpg1420</i> | cytidylate kinase                                                                             | <i>cmk</i>  | Nucleotide Metabolism                            | 13.724 | 13.415 | 10.468 | 14.132 | 8.29E-01 | 8.73E-03 | -0.31 | 3.66  |
| <i>lpg1420</i> | cytidylate kinase                                                                             | <i>cmk</i>  | Nucleotide Metabolism                            | 14.242 | 13.309 | 10.525 | 14.263 | 3.47E-01 | 4.95E-03 | -0.93 | 3.74  |
| <i>lpg1421</i> | 30S ribosomal protein S1                                                                      | <i>rpsA</i> | Translation                                      | 14.417 | 13.646 | 14.099 | 14.567 | 2.65E-04 | 1.02E-01 | -0.77 | 0.47  |
| <i>lpg1421</i> | 30S ribosomal protein S1                                                                      | <i>rpsA</i> | Translation                                      | 14.502 | 13.669 | 14.055 | 14.528 | 2.35E-03 | 7.80E-02 | -0.83 | 0.47  |
| <i>lpg1422</i> | hypothetical COG3771: membrane protein                                                        |             | Unknown / hypothetical proteins                  | 12.418 | 10.914 | 11.463 | 11.322 | 5.91E-04 | 8.09E-01 | -1.50 | -0.14 |
| <i>lpg1422</i> | hypothetical COG3771: membrane protein                                                        |             | Unknown / hypothetical proteins                  | 12.361 | 10.838 | 10.748 | 11.116 | 3.35E-04 | 6.08E-01 | -1.52 | 0.37  |
| <i>lpg1423</i> | TPR domain protein (heat shock protein) N-acetylglucosaminyl transferase                      |             | Detoxification / adaptation, Protein fate        | 12.648 | 11.867 | 11.572 | 12.263 | 8.34E-02 | 9.58E-02 | -0.78 | 0.69  |
| <i>lpg1423</i> | TPR domain protein (heat shock protein) N-acetylglucosaminyl transferase                      |             | Detoxification / adaptation, Protein fate        | 12.587 | 11.678 | 11.257 | 12.128 | 3.74E-02 | 8.84E-02 | -0.91 | 0.87  |
| <i>lpg1424</i> | aminotransferase (amino sugar biosynthesis protein) (lipopolysaccharide biosynthesis protein) |             | Metabolism of Complex Lipids                     | 11.936 | 11.866 | 9.744  | 11.668 | 8.48E-01 | 2.65E-02 | -0.07 | 1.92  |
| <i>lpg1424</i> | aminotransferase (amino sugar biosynthesis protein) (lipopolysaccharide biosynthesis protein) |             | Metabolism of Complex Lipids                     | 11.977 | 11.844 | 9.637  | 12.000 | 6.89E-01 | 9.15E-03 | -0.13 | 2.36  |
| <i>lpg1425</i> | orotidine 5'-phosphate decarboxylase PylF                                                     | <i>pyrF</i> | Nucleotide Metabolism                            | 11.107 | 8.988  | 8.400  | 10.093 | 2.55E-02 | 7.86E-02 | -2.12 | 1.69  |
| <i>lpg1425</i> | orotidine 5'-phosphate decarboxylase PylF                                                     | <i>pyrF</i> | Nucleotide Metabolism                            | 11.211 | 8.880  | 8.527  | 10.269 | 4.98E-03 | 7.34E-02 | -2.33 | 1.74  |
| <i>lpg1426</i> | hypothetical (serine protease?)                                                               | <i>VpdC</i> | Protein fate / hydrolases / secretion            | 10.849 | 8.239  | 9.118  | 7.649  | 5.55E-05 | 1.27E-01 | -2.61 | -1.47 |
| <i>lpg1426</i> | hypothetical (serine protease?)                                                               | <i>VpdC</i> | Protein fate / hydrolases / secretion            | 10.607 | 7.983  | 8.311  | 7.244  | 1.48E-04 | 3.77E-01 | -2.62 | -1.07 |
| <i>lpg1427</i> | short chain dehydrogenase (3-oxoacyl [acyl carrier protein] reductase)                        |             | Lipid Metabolism                                 | 12.463 | 10.061 | 12.997 | 10.640 | 1.10E-04 | 5.25E-06 | -2.40 | -2.36 |
| <i>lpg1427</i> | short chain dehydrogenase (3-oxoacyl [acyl carrier protein] reductase)                        |             | Lipid Metabolism                                 | 12.518 | 10.584 | 13.013 | 10.712 | 4.92E-05 | 7.33E-06 | -1.93 | -2.30 |
| <i>lpg1428</i> | competence comG operon protein?, type 4 fimbrial pilin related signal                         |             | Named proteins of general function               | 9.794  | 7.710  | 9.551  | 6.732  | 6.23E-05 | 1.49E-03 | -2.08 | -2.82 |
| <i>lpg1428</i> | competence comG operon protein?, type 4 fimbrial pilin related signal                         |             | Named proteins of general function               | 9.840  | 8.016  | 8.453  | 6.914  | 5.39E-04 | 4.76E-01 | -1.82 | -1.54 |
| <i>lpg1429</i> | ORF                                                                                           |             | ORFs of unknown function (unique)                | 10.316 | 9.429  | 9.083  | 9.844  | 1.60E-01 | 2.47E-01 | -0.89 | 0.76  |
| <i>lpg1429</i> | ORF                                                                                           |             | ORFs of unknown function (unique)                | 10.710 | 9.744  | 8.985  | 10.291 | 1.07E-01 | 1.19E-01 | -0.97 | 1.31  |
| <i>lpg1430</i> | 4-hydroxybenzoate octaprenyltransferase UbiA                                                  |             | Metabolism of Cofactors and Vitamins             | 9.470  | 10.039 | 9.526  | 9.598  | 3.46E-01 | 9.03E-01 | 0.57  | 0.07  |
| <i>lpg1430</i> | 4-hydroxybenzoate octaprenyltransferase UbiA                                                  |             | Metabolism of Cofactors and Vitamins             | 9.525  | 10.080 | 9.473  | 9.856  | 3.71E-01 | 4.60E-01 | 0.56  | 0.38  |
| <i>lpg1431</i> | outer membrane lipoprotein?                                                                   |             | Named proteins of general function               | 12.700 | 12.064 | 12.371 | 10.815 | 2.31E-01 | 1.33E-02 | -0.64 | -1.56 |
| <i>lpg1431</i> | outer membrane lipoprotein?                                                                   |             | Named proteins of general function               | 12.715 | 12.295 | 12.401 | 11.230 | 2.50E-01 | 7.05E-03 | -0.42 | -1.17 |
| <i>lpg1432</i> | FAD linked oxidase (isoamyl alcohol oxidase) (oxidoreductase, oxygen)                         |             | Named proteins of general function               | 9.320  | 8.733  | 9.841  | 7.865  | 5.42E-01 | 5.51E-03 | -0.59 | -1.98 |
| <i>lpg1432</i> | FAD linked oxidase (isoamyl alcohol oxidase) (oxidoreductase, oxygen)                         |             | Named proteins of general function               | 9.298  | 9.150  | 8.956  | 8.420  | 9.09E-01 | 1.24E-01 | -0.15 | -1.44 |
| <i>lpg1433</i> | 2-deoxyribose-5-phosphate aldolase                                                            | <i>deoC</i> | Carbohydrate Metabolism                          | 10.342 | 8.612  | 8.254  | 8.151  | 1.13E-02 | 9.19E-01 | -1.73 | -0.10 |
| <i>lpg1433</i> | 2-deoxyribose-5-phosphate aldolase                                                            | <i>deoC</i> | Carbohydrate Metabolism                          | 10.095 | 7.985  | 8.580  | 8.552  | 1.14E-02 | 9.70E-01 | -2.11 | -0.03 |
| <i>lpg1434</i> | xanthosine phosphorylase (purine nucleoside phosphorylase) <i>xapA</i>                        | <i>xapA</i> | Nucleotide Metabolism                            | 11.519 | 10.086 | 11.463 | 11.677 | 5.54E-04 | 5.79E-01 | -1.43 | 0.21  |
| <i>lpg1434</i> | xanthosine phosphorylase (purine nucleoside phosphorylase) <i>xapA</i>                        | <i>xapA</i> | Nucleotide Metabolism                            | 11.150 | 10.541 | 11.230 | 11.994 | 1.58E-01 | 3.08E-02 | -0.61 | 0.76  |
| <i>lpg1435</i> | cytidine deaminase (cytidine and deoxycytidine deaminase) <i>cdd</i>                          | <i>cdd</i>  | Nucleotide Metabolism                            | 11.871 | 10.483 | 9.881  | 11.902 | 3.57E-02 | 1.46E-02 | -1.39 | 2.02  |
| <i>lpg1435</i> | cytidine deaminase (cytidine and deoxycytidine deaminase) <i>cdd</i>                          | <i>cdd</i>  | Nucleotide Metabolism                            | 11.571 | 11.040 | 9.902  | 12.104 | 5.99E-01 | 1.48E-02 | -0.53 | 2.20  |
| <i>lpg1436</i> | ORF                                                                                           |             | ORFs of unknown function (unique)                | 10.229 | 9.624  | 9.411  | 9.256  | 2.49E-01 | 8.14E-01 | -0.60 | -0.16 |
| <i>lpg1436</i> | ORF                                                                                           |             | ORFs of unknown function (unique)                | 10.283 | 9.403  | 9.331  | 9.192  | 1.83E-01 | 8.77E-01 | -0.88 | -0.14 |
| <i>lpg1437</i> | sensor histidine kinase CpxA (two component sensor)                                           | <i>cpxA</i> | Signal transduction / other regulatory f         | 11.121 | 10.058 | 9.970  | 9.213  | 1.18E-01 | 2.73E-01 | -1.06 | -0.76 |
| <i>lpg1437</i> | sensor histidine kinase CpxA (two component sensor)                                           | <i>cpxA</i> | Signal transduction / other regulatory f         | 11.155 | 10.191 | 9.838  | 9.331  | 5.40E-02 | 1.79E-01 | -0.96 | -0.51 |
| <i>lpg1438</i> | transcriptional regulatory protein CpxR (DNA binding repressor) <i>cpxR</i>                   | <i>cpxR</i> | Transcription factors / DNA binding prc          | 13.132 | 10.699 | 13.080 | 10.506 | 1.90E-05 | 4.67E-06 | -2.43 | -2.57 |
| <i>lpg1438</i> | transcriptional regulatory protein CpxR (DNA binding repressor) <i>cpxR</i>                   | <i>cpxR</i> | Transcription factors / DNA binding prc          | 13.171 | 11.126 | 13.153 | 10.904 | 1.11E-08 | 3.79E-07 | -2.05 | -2.25 |
| <i>lpg1439</i> | Mg2+ and Co2+ transporter CorC (metal ion transporter) (hemolysin)                            |             | Transport and binding, Toxin production          | 13.734 | 10.798 | 13.693 | 9.581  | 3.53E-03 | 2.13E-03 | -2.94 | -4.11 |
| <i>lpg1439</i> | Mg2+ and Co2+ transporter CorC (metal ion transporter) (hemolysin)                            |             | Transport and binding, Toxin production          | 13.699 | 11.285 | 13.622 | 9.931  | 9.98E-04 | 7.19E-04 | -2.41 | -3.69 |
| <i>lpg1440</i> | metal dependent hydrolase                                                                     |             | Protein fate / hydrolases / secretion            | 12.603 | 10.503 | 12.829 | 11.262 | 5.87E-07 | 4.18E-05 | -2.10 | -1.57 |
| <i>lpg1440</i> | metal dependent hydrolase                                                                     |             | Protein fate / hydrolases / secretion            | 12.470 | 10.623 | 12.639 | 11.374 | 2.78E-05 | 4.02E-06 | -1.85 | -1.26 |
| <i>lpg1441</i> | phosphate starvation-inducible protein PhoH (ATP binding protein)                             |             | Detoxification / adaptation, Signal transduction | 13.856 | 12.529 | 14.250 | 12.106 | 1.65E-03 | 8.10E-05 | -1.33 | -2.14 |
| <i>lpg1441</i> | phosphate starvation-inducible protein PhoH (ATP binding protein)                             |             | Detoxification / adaptation, Signal transduction | 13.854 | 12.626 | 14.208 | 12.543 | 2.33E-02 | 4.16E-03 | -1.23 | -1.66 |
| <i>lpg1442</i> | metal dependent phosphoesterase (PHP family)                                                  |             | Protein fate / hydrolases / secretion            | 11.579 | 10.743 | 9.487  | 11.620 | 2.97E-01 | 3.24E-03 | -0.84 | 2.13  |
| <i>lpg1442</i> | metal dependent phosphoesterase (PHP family)                                                  |             | Protein fate / hydrolases / secretion            | 11.686 | 11.285 | 9.504  | 11.949 | 3.13E-01 | 3.52E-04 | -0.40 | 2.44  |
| <i>lpg1443</i> | translation factor (Sua5/YciO/YrdC/YwC family protein)                                        |             | Translation                                      | 11.411 | 10.689 | 10.224 | 9.698  | 7.61E-02 | 4.56E-01 | -0.72 | -0.53 |
| <i>lpg1443</i> | translation factor (Sua5/YciO/YrdC/YwC family protein)                                        |             | Translation                                      | 11.393 | 10.522 | 10.112 | 10.505 | 6.13E-02 | 4.38E-01 | -0.87 | 0.39  |
| <i>lpg1444</i> | tryptophanyl tRNA synthetase                                                                  | <i>trpS</i> | Amino Acid Metabolism, Translation               | 11.943 | 12.049 | 11.943 | 12.052 | 6.93E-01 | 7.03E-01 | 0.11  | 0.11  |
| <i>lpg1444</i> | tryptophanyl tRNA synthetase                                                                  | <i>trpS</i> | Amino Acid Metabolism, Translation               | 12.044 | 12.383 | 11.923 | 12.187 | 2.84E-01 | 2.58E-01 | 0.34  | 0.26  |
| <i>lpg1445</i> | conserved hypothetical protein                                                                |             | Unknown / hypothetical proteins                  | 10.134 | 9.500  | 9.069  | 9.848  | 1.03E-01 | 1.41E-01 | -0.63 | 0.78  |
| <i>lpg1445</i> | conserved hypothetical protein                                                                |             | Unknown / hypothetical proteins                  | 10.162 | 9.960  | 8.776  | 9.750  | 6.75E-01 | 1.34E-01 | -0.20 | 0.97  |
| <i>lpg1446</i> | hypothetical (transcriptional regulator) TIGR00281                                            |             | Transcription factors / DNA binding prc          | 10.313 | 8.211  | 10.398 | 9.129  | 5.36E-04 | 6.85E-02 | -2.10 | -1.27 |
| <i>lpg1446</i> | hypothetical (transcriptional regulator) TIGR00281                                            |             | Transcription factors / DNA binding prc          | 10.462 | 8.276  | 9.982  | 9.625  | 2.05E-02 | 5.83E-01 | -2.19 | -0.36 |
| <i>lpg1447</i> | pseudouridine synthase                                                                        |             | DNA/RNA degradation / restriction, Trc           | 12.232 | 11.468 | 12.850 | 12.260 | 1.06E-03 | 6.51E-03 | -0.76 | -0.59 |
| <i>lpg1447</i> | pseudouridine synthase                                                                        |             | DNA/RNA degradation / restriction, Trc           | 12.190 | 11.535 | 12.737 | 12.229 | 6.56E-04 | 2.42E-02 | -0.66 | -0.51 |
| <i>lpg1448</i> | transcription regulator protein, COG2197: response regulator containing                       |             | Signal transduction / other regulatory f         | 9.972  | 7.428  | 8.203  | 8.216  | 2.26E-02 | 9.86E-01 | -2.54 | 0.01  |
| <i>lpg1448</i> | transcription regulator protein, COG2197: response regulator containing                       |             | Signal transduction / other regulatory f         | 10.159 | 9.118  | 7.283  | 8.704  | 3.96E-01 | 4.58E-01 | -1.04 | 1.42  |
| <i>lpg1449</i> | ORF                                                                                           |             | ORFs of unknown function (unique)                | 10.166 | 10.343 | 8.993  | 10.410 | 4.43E-01 | 4.05E-02 | 0.18  | 0.52  |
| <i>lpg1449</i> | ORF                                                                                           |             | ORFs of unknown function (unique)                | 10.101 | 10.277 | 9.805  | 10.475 | 5.58E-01 | 2.35E-02 | 0.18  | 0.67  |
| <i>lpg1450</i> | iron/ascorbate oxidoreductase family protein, putative                                        |             | Named proteins of general function               | 9.702  | 8.999  | 8.783  | 8.586  | 1.00E-01 | 8.16E-01 | -0.70 | -0.20 |
| <i>lpg1450</i> | iron/ascorbate oxidoreductase family protein, putative                                        |             | Named proteins of general function               | 9.213  | 9.710  | 9.133  | 9.136  | 2.76E-01 | 9.98E-01 | 0.50  | 0.00  |
| <i>lpg1451</i> | hypothetical (phosphatidylethanolamine binding protein)                                       |             | Cell envelope synthesis, Transport and           | 12.150 | 13.868 | 14.485 | 13.439 | 7.75E-03 | 9.18E-02 | 1.72  | -1.05 |
| <i>lpg1451</i> | hypothetical (phosphatidylethanolamine binding protein)                                       |             | Cell envelope synthesis, Transport and           | 11.304 | 13.444 | 13.572 | 12.629 | 5.26E-03 | 1.90E-01 | 2.14  | -0.94 |

|                |                                                                                  |              |        |        |        |        |          |          |       |       |
|----------------|----------------------------------------------------------------------------------|--------------|--------|--------|--------|--------|----------|----------|-------|-------|
| <i>lpg1452</i> | lipase A? (hydrolase, alpha/beta fold family), kraken-like (serine hydrolase)    |              | 10.072 | 9.145  | 9.421  | 9.497  | 1.56E-01 | 9.18E-01 | -0.93 | 0.08  |
| <i>lpg1452</i> | lipase A? (hydrolase, alpha/beta fold family), kraken-like (serine hydrolase)    |              | 10.593 | 10.210 | 9.827  | 10.201 | 4.67E-01 | 6.00E-01 | -0.38 | 0.37  |
| <i>lpg1453</i> | ORF                                                                              |              | 12.885 | 14.680 | 13.212 | 13.909 | 9.30E-07 | 1.68E-03 | 1.80  | 0.70  |
| <i>lpg1453</i> | ORF                                                                              |              | 12.739 | 14.697 | 13.151 | 13.950 | 5.93E-07 | 1.51E-03 | 1.96  | 0.80  |
| <i>lpg1454</i> | multidrug efflux protein (MFS transporter)                                       |              | 9.305  | 8.966  | 10.438 | 7.835  | 6.12E-01 | 1.11E-02 | -0.34 | -2.60 |
| <i>lpg1454</i> | multidrug efflux protein (MFS transporter)                                       |              | 9.245  | 8.676  | 10.128 | 8.935  | 4.06E-01 | 9.22E-02 | -0.57 | -1.19 |
| <i>lpg1455</i> | phospholipase C (phosphatidylcholine hydrolyzing)                                |              | 10.873 | 9.732  | 12.782 | 8.511  | 3.12E-02 | 5.98E-05 | -1.14 | -4.27 |
| <i>lpg1455</i> | phospholipase C (phosphatidylcholine hydrolyzing)                                |              | 10.508 | 9.725  | 12.644 | 8.593  | 2.03E-01 | 2.80E-04 | -0.78 | -4.05 |
| <i>lpg1456</i> | 23S rRNA (uracil-5-)methyltransferase Ruma (RNA methyltransferase)               |              | 8.329  | 10.475 | 8.818  | 9.815  | 2.75E-02 | 1.42E-01 | 2.15  | 1.00  |
| <i>lpg1456</i> | 23S rRNA (uracil-5-)methyltransferase Ruma (RNA methyltransferase)               |              | 8.637  | 10.102 | 8.629  | 10.332 | 9.30E-03 | 1.46E-02 | 1.47  | 1.70  |
| <i>lpg1457</i> | GTP pyrophosphokinase ((p)ppGpp synthetase I) stringe <i>relA</i>                |              | 12.201 | 11.959 | 11.831 | 11.942 | 2.90E-01 | 6.01E-01 | -0.24 | 0.11  |
| <i>lpg1457</i> | GTP pyrophosphokinase ((p)ppGpp synthetase I) stringe <i>relA</i>                |              | 12.137 | 11.955 | 11.811 | 11.978 | 4.45E-01 | 4.34E-01 | -0.18 | 0.17  |
| <i>lpg1458</i> | hypothetical membrane protein                                                    |              | 10.794 | 9.426  | 9.395  | 9.211  | 1.84E-03 | 7.47E-01 | -1.37 | -0.18 |
| <i>lpg1458</i> | hypothetical membrane protein                                                    |              | 10.744 | 9.533  | 9.252  | 9.182  | 4.35E-03 | 9.14E-01 | -1.21 | -0.07 |
| <i>lpg1459</i> | aspartate aminotransferase (aminotransferase, N-succinyl <i>yfdZ</i> )           |              | 11.885 | 11.688 | 10.356 | 11.524 | 7.59E-01 | 4.36E-02 | -0.20 | 1.17  |
| <i>lpg1459</i> | aspartate aminotransferase (aminotransferase, N-succinyl <i>yfdZ</i> )           |              | 12.031 | 11.343 | 9.625  | 11.387 | 1.94E-01 | 1.50E-02 | -0.69 | 1.76  |
| <i>lpg1460</i> | conserved hypothetical protein                                                   |              | 11.822 | 10.865 | 9.841  | 11.921 | 7.85E-02 | 1.67E-03 | -0.96 | 2.08  |
| <i>lpg1460</i> | conserved hypothetical protein                                                   |              | 11.865 | 10.791 | 9.613  | 11.980 | 5.43E-02 | 1.20E-03 | -1.07 | 2.37  |
| <i>lpg1461</i> | single stranded DNA specific exonuclease RecJ                                    | <i>recJ</i>  | 12.688 | 11.231 | 12.412 | 11.338 | 2.28E-04 | 1.19E-04 | -1.46 | -1.07 |
| <i>lpg1461</i> | single stranded DNA specific exonuclease RecJ                                    | <i>recJ</i>  | 12.664 | 11.262 | 12.341 | 11.281 | 8.97E-05 | 9.43E-03 | -1.40 | -1.06 |
| <i>lpg1462</i> | zinc binding TIM barrel protein, YjbN family (tRNA-dihydrouridine synthetase)    |              | 10.525 | 10.648 | 10.276 | 10.672 | 7.26E-01 | 3.26E-01 | 0.12  | 0.40  |
| <i>lpg1462</i> | zinc binding TIM barrel protein, YjbN family (tRNA-dihydrouridine synthetase)    |              | 10.491 | 10.627 | 10.126 | 10.578 | 7.52E-01 | 4.06E-01 | 0.14  | 0.45  |
| <i>lpg1463</i> | preprotein translocase; secretion protein SecA                                   | <i>secA</i>  | 12.060 | 11.768 | 11.908 | 12.305 | 3.68E-01 | 2.81E-01 | -0.29 | 0.40  |
| <i>lpg1463</i> | preprotein translocase; secretion protein SecA                                   | <i>secA</i>  | 12.096 | 11.630 | 11.890 | 12.324 | 1.79E-01 | 1.97E-01 | -0.47 | 0.43  |
| <i>lpg1464</i> | NTP pyrophosphohydrolase (mutator protein MutT) (8-oxo-dGTPase)                  |              | 11.379 | 9.360  | 9.818  | 9.253  | 3.94E-03 | 4.55E-01 | -2.02 | -0.57 |
| <i>lpg1464</i> | NTP pyrophosphohydrolase (mutator protein MutT) (8-oxo-dGTPase)                  |              | 11.373 | 9.714  | 9.348  | 9.491  | 1.60E-02 | 8.60E-01 | -1.66 | 0.14  |
| <i>lpg1465</i> | ORF                                                                              |              | 9.147  | 9.167  | 8.419  | 7.341  | 9.67E-01 | 4.03E-01 | 0.02  | -1.08 |
| <i>lpg1465</i> | ORF                                                                              |              | 9.495  | 9.623  | 8.634  | 8.211  | 7.90E-01 | 6.15E-01 | 0.13  | -0.42 |
| <i>lpg1466</i> | conserved hypothetical protein                                                   |              | 11.116 | 11.848 | 10.682 | 10.097 | 6.17E-02 | 1.58E-01 | 0.73  | -0.59 |
| <i>lpg1466</i> | conserved hypothetical protein                                                   |              | 11.175 | 11.885 | 10.659 | 10.146 | 4.89E-02 | 1.68E-01 | 0.71  | -0.51 |
| <i>lpg1467</i> | dephospho-CoA kinase (DNA repair protein?)                                       |              | 10.351 | 10.224 | 10.119 | 9.724  | 6.53E-01 | 1.62E-01 | -0.13 | -0.40 |
| <i>lpg1467</i> | dephospho-CoA kinase (DNA repair protein?)                                       |              | 10.458 | 10.138 | 9.941  | 9.830  | 2.02E-01 | 6.98E-01 | -0.32 | -0.11 |
| <i>lpg1468</i> | small ORF (157aa)                                                                |              | 11.543 | 13.598 | 12.934 | 11.963 | 2.05E-05 | 2.94E-03 | 2.06  | -0.97 |
| <i>lpg1468</i> | small ORF (157aa)                                                                |              | 11.573 | 13.579 | 12.920 | 11.969 | 7.35E-05 | 3.38E-03 | 2.01  | -0.95 |
| <i>lpg1469</i> | Rtn protein (membrane protein involved in resistance to lambda and lambda phage) |              | 9.316  | 9.187  | 9.170  | 6.789  | 8.53E-01 | 1.55E-01 | -0.13 | -2.38 |
| <i>lpg1469</i> | Rtn protein (membrane protein involved in resistance to lambda and lambda phage) |              | 9.273  | 8.817  | 9.181  | 9.068  | 3.07E-01 | 9.02E-01 | -0.46 | -0.11 |
| <i>lpg1470</i> | serine-type D-Ala-D-Ala carboxypeptidase (D-alanyl-D-alanine carboxypeptidase)   |              | 9.884  | 9.728  | 9.046  | 10.060 | 8.60E-01 | 8.80E-02 | -0.16 | 1.01  |
| <i>lpg1470</i> | serine-type D-Ala-D-Ala carboxypeptidase (D-alanyl-D-alanine carboxypeptidase)   |              | 10.664 | 9.884  | 8.466  | 10.378 | 7.76E-02 | 1.99E-03 | -0.78 | 1.91  |
| <i>lpg1471</i> | adenosylmethionine-8-amino-7-oxononanoate aminotransferase <i>bioA</i>           |              | 9.484  | 8.059  | 9.375  | 7.927  | 3.62E-02 | 2.25E-01 | -1.42 | -1.45 |
| <i>lpg1471</i> | adenosylmethionine-8-amino-7-oxononanoate aminotransferase <i>bioA</i>           |              | 9.826  | 8.456  | 8.910  | 8.734  | 1.45E-02 | 7.76E-01 | -1.37 | -0.18 |
| <i>lpg1472</i> | biotin synthase BioB                                                             |              | 9.978  | 9.651  | 10.129 | 9.343  | 5.90E-01 | 3.01E-01 | -0.33 | -0.79 |
| <i>lpg1472</i> | biotin synthase BioB                                                             |              | 10.002 | 9.281  | 10.216 | 10.130 | 3.44E-01 | 8.52E-01 | -0.72 | -0.09 |
| <i>lpg1473</i> | 8-amino-7-oxononanoate synthase <i>bioF</i>                                      |              | 7.164  | 7.842  | 8.973  | 8.644  | 4.07E-01 | 5.11E-01 | 0.68  | -0.33 |
| <i>lpg1473</i> | 8-amino-7-oxononanoate synthase <i>bioF</i>                                      |              | 6.883  | 8.125  | 8.625  | 8.761  | 1.46E-01 | 8.39E-01 | 1.24  | 0.14  |
| <i>lpg1474</i> | biotin biosynthesis protein BioH (hydrolase?)                                    |              | 10.471 | 10.038 | 11.199 | 9.837  | 1.03E-01 | 1.69E-04 | -0.43 | -1.36 |
| <i>lpg1474</i> | biotin biosynthesis protein BioH (hydrolase?)                                    |              | 10.285 | 9.669  | 11.056 | 9.921  | 1.68E-02 | 6.83E-05 | -0.62 | -1.13 |
| <i>lpg1475</i> | dethiobiotin synthetase (cobyrinic acid a,c-diamide synthetase) <i>bioD</i>      |              | 10.438 | 8.763  | 10.583 | 9.419  | 7.63E-06 | 2.36E-02 | -1.67 | -1.16 |
| <i>lpg1475</i> | dethiobiotin synthetase (cobyrinic acid a,c-diamide synthetase) <i>bioD</i>      |              | 10.406 | 9.228  | 10.604 | 9.696  | 3.54E-04 | 7.78E-03 | -1.18 | -0.91 |
| <i>lpg1476</i> | hypothetical (type I antifreeze protein?) COG2331                                |              | 11.100 | 12.315 | 10.462 | 12.486 | 6.88E-03 | 5.15E-04 | 1.21  | 2.02  |
| <i>lpg1476</i> | hypothetical (type I antifreeze protein?) COG2331                                |              | 11.057 | 12.359 | 10.429 | 12.502 | 3.39E-03 | 1.95E-04 | 1.30  | 2.07  |
| <i>lpg1477</i> | transmembrane protein                                                            |              | 11.995 | 11.435 | 10.744 | 11.286 | 2.27E-01 | 2.55E-01 | -0.56 | 0.54  |
| <i>lpg1477</i> | transmembrane protein                                                            |              | 12.061 | 11.466 | 10.582 | 11.528 | 2.29E-01 | 4.76E-02 | -0.59 | 0.95  |
| <i>lpg1478</i> | aspartyl tRNA synthetase                                                         |              | 12.125 | 10.750 | 10.135 | 11.460 | 2.57E-03 | 3.62E-02 | -1.37 | 1.33  |
| <i>lpg1478</i> | aspartyl tRNA synthetase                                                         |              | 12.080 | 10.973 | 9.814  | 11.547 | 7.84E-03 | 6.03E-02 | -1.11 | 1.73  |
| <i>lpg1479</i> | potassium efflux system KefA (integral membrane protein)                         |              | 10.828 | 9.979  | 9.522  | 9.725  | 9.20E-03 | 7.09E-01 | -0.85 | 0.20  |
| <i>lpg1479</i> | potassium efflux system KefA (integral membrane protein)                         |              | 11.275 | 10.055 | 9.989  | 10.199 | 4.47E-04 | 6.47E-01 | -1.22 | 0.21  |
| <i>lpg1480</i> | DNA mismatch repair protein MutH                                                 | <i>mutH</i>  | 10.385 | 9.633  | 10.118 | 9.199  | 1.38E-01 | 1.20E-01 | -0.75 | -0.92 |
| <i>lpg1480</i> | DNA mismatch repair protein MutH                                                 | <i>mutH</i>  | 10.664 | 9.815  | 9.889  | 9.882  | 4.45E-02 | 9.88E-01 | -0.85 | -0.01 |
| <i>lpg1481</i> | ORF                                                                              |              | 10.787 | 10.758 | 10.163 | 9.756  | 9.59E-01 | 2.47E-01 | -0.03 | -0.41 |
| <i>lpg1481</i> | ORF                                                                              |              | 11.305 | 10.635 | 10.246 | 9.961  | 4.50E-02 | 4.83E-01 | -0.67 | -0.29 |
| <i>lpg1482</i> | ORF                                                                              |              | 12.766 | 15.031 | 12.160 | 13.155 | 6.14E-06 | 1.71E-02 | 2.27  | 1.00  |
| <i>lpg1482</i> | ORF                                                                              |              | 12.846 | 15.022 | 12.174 | 13.191 | 2.39E-06 | 1.29E-02 | 2.18  | 1.02  |
| <i>lpg1483</i> | ovarian-specific serine/threonine-protein kinase                                 | <i>legK1</i> | 9.928  | 10.160 | 10.650 | 9.819  | 4.67E-01 | 9.13E-02 | 0.23  | -0.83 |
| <i>lpg1483</i> | ovarian-specific serine/threonine-protein kinase                                 | <i>legK1</i> | 10.328 | 9.485  | 9.946  | 9.847  | 3.45E-01 | 9.11E-01 | -0.84 | -0.10 |

|                |                                                                             |              |                                         |        |        |        |        |          |          |       |       |
|----------------|-----------------------------------------------------------------------------|--------------|-----------------------------------------|--------|--------|--------|--------|----------|----------|-------|-------|
| <i>lpg1484</i> | ORF                                                                         |              | ORFs of unknown function (unique)       | 8.401  | 10.843 | 9.543  | 11.594 | 2.12E-03 | 2.57E-06 | 2.44  | 2.05  |
| <i>lpg1484</i> | ORF                                                                         |              | ORFs of unknown function (unique)       | 8.488  | 10.352 | 9.025  | 11.724 | 1.03E-02 | 2.93E-05 | 1.86  | 2.70  |
| <i>lpg1485</i> | hypothetical                                                                |              | Unknown / hypothetical proteins         | 9.238  | 8.988  | 13.079 | 8.400  | 8.39E-01 | 6.72E-03 | -0.25 | -4.68 |
| <i>lpg1485</i> | hypothetical                                                                |              | Unknown / hypothetical proteins         | 9.258  | 8.605  | 12.996 | 8.490  | 5.15E-01 | 1.35E-02 | -0.65 | -4.51 |
| <i>lpg1486</i> | AsnC family transcription regulator protein (amino acid metabolism)         |              | Transcription factors / DNA binding prc | 9.743  | 8.972  | 9.570  | 8.501  | 2.29E-01 | 1.55E-01 | -0.77 | -1.07 |
| <i>lpg1486</i> | AsnC family transcription regulator protein (amino acid metabolism)         |              | Transcription factors / DNA binding prc | 9.877  | 9.260  | 10.110 | 9.047  | 3.05E-01 | 1.85E-01 | -0.62 | -1.06 |
| <i>lpg1487</i> | acetyltransferase, GNAT family                                              |              | Named proteins of general function      | 8.717  | 9.079  | 9.773  | 8.991  | 1.97E-01 | 1.07E-01 | 0.36  | -0.78 |
| <i>lpg1487</i> | acetyltransferase, GNAT family                                              |              | Named proteins of general function      | 8.696  | 10.170 | 9.840  | 9.315  | 7.22E-02 | 5.90E-01 | 1.47  | -0.52 |
| <i>lpg1488</i> | surface antigen of Plasmodium and Entamoeba                                 | <i>legC5</i> | Named proteins of general function      | 10.461 | 11.039 | 9.510  | 10.679 | 2.12E-01 | 1.08E-01 | 0.58  | 1.17  |
| <i>lpg1488</i> | surface antigen of Plasmodium and Entamoeba                                 | <i>legC5</i> | Named proteins of general function      | 10.564 | 11.666 | 9.681  | 11.536 | 2.04E-01 | 1.07E-01 | 1.10  | 1.86  |
| <i>lpg1489</i> | ORF                                                                         |              | ORFs of unknown function (unique)       | 10.368 | 12.322 | 10.603 | 10.655 | 4.69E-03 | 8.84E-01 | 1.95  | 0.05  |
| <i>lpg1489</i> | ORF                                                                         |              | ORFs of unknown function (unique)       | 10.754 | 12.498 | 10.429 | 10.692 | 1.42E-03 | 5.19E-01 | 1.74  | 0.26  |
| <i>lpg1490</i> | adenylate cyclase PLUS two component hybrid sensor ai <i>cyaA</i>           |              | Nucleotide Metabolism                   | 9.384  | 8.104  | 12.508 | 7.446  | 2.23E-01 | 2.04E-03 | -1.28 | -5.06 |
| <i>lpg1490</i> | adenylate cyclase PLUS two component hybrid sensor ai <i>cyaA</i>           |              | Nucleotide Metabolism                   | 9.433  | 8.561  | 12.567 | 8.222  | 4.32E-01 | 2.82E-03 | -0.87 | -4.35 |
| <i>lpg1491</i> | ORF                                                                         |              | ORFs of unknown function (unique)       | 9.983  | 10.118 | 13.074 | 9.966  | 8.80E-01 | 3.35E-03 | 0.14  | -3.11 |
| <i>lpg1491</i> | ORF                                                                         |              | ORFs of unknown function (unique)       | 10.014 | 10.705 | 13.146 | 10.858 | 5.46E-01 | 3.88E-02 | 0.69  | -2.29 |
| <i>lpg1492</i> | spectinomycin phosphotransferase                                            |              | Transport and binding                   | 8.080  | 7.539  | 8.649  | 7.096  | 4.04E-01 | 2.35E-01 | -0.54 | -1.55 |
| <i>lpg1492</i> | spectinomycin phosphotransferase                                            |              | Transport and binding                   | 8.140  | 6.593  | 8.792  | 8.475  | 2.12E-01 | 6.65E-01 | -1.55 | -0.32 |
| <i>lpg1493</i> | small ORF (72aa)?                                                           |              | ORFs of unknown function (unique)       | 8.135  | 8.700  | 9.163  | 9.285  | 5.60E-01 | 9.23E-01 | 0.57  | 0.12  |
| <i>lpg1493</i> | small ORF (72aa)?                                                           |              | ORFs of unknown function (unique)       | 8.517  | 9.474  | 9.501  | 10.086 | 4.16E-01 | 6.21E-01 | 0.96  | 0.58  |
| <i>lpg1494</i> | small ORF (140aa) hypothetical                                              |              | Unknown / hypothetical proteins         | 9.069  | 9.363  | 9.349  | 8.988  | 5.45E-01 | 2.08E-01 | 0.29  | -0.36 |
| <i>lpg1494</i> | small ORF (140aa) hypothetical                                              |              | Unknown / hypothetical proteins         | 8.976  | 9.437  | 9.234  | 8.964  | 1.66E-01 | 5.34E-01 | 0.46  | -0.27 |
| <i>lpg1495</i> | small ORF (97aa)                                                            |              | ORFs of unknown function (unique)       | 12.233 | 14.493 | 13.067 | 11.032 | 4.65E-04 | 9.32E-04 | 2.26  | -2.04 |
| <i>lpg1495</i> | small ORF (97aa)                                                            |              | ORFs of unknown function (unique)       | 12.065 | 14.239 | 12.985 | 11.110 | 4.36E-03 | 9.67E-04 | 2.17  | -1.88 |
| <i>lpg1496</i> | ORF                                                                         |              | ORFs of unknown function (unique)       | 9.249  | 8.887  | 13.981 | 8.336  | 7.88E-01 | 9.37E-04 | -0.36 | -5.65 |
| <i>lpg1496</i> | ORF                                                                         |              | ORFs of unknown function (unique)       | 8.457  | 8.719  | 13.356 | 7.827  | 8.34E-01 | 1.69E-04 | 0.26  | -5.53 |
| <i>lpg1497</i> | aminopeptidase N                                                            | <i>pepN</i>  | Metabolism of Other Amino Acids         | 11.825 | 10.835 | 14.125 | 10.024 | 1.99E-01 | 1.10E-04 | -0.99 | -4.10 |
| <i>lpg1497</i> | aminopeptidase N                                                            | <i>pepN</i>  | Metabolism of Other Amino Acids         | 11.843 | 10.462 | 14.151 | 10.099 | 4.76E-02 | 6.93E-05 | -1.38 | -4.05 |
| <i>lpg1498</i> | ORF                                                                         |              | ORFs of unknown function (unique)       | 10.708 | 10.642 | 10.306 | 9.708  | 8.92E-01 | 3.31E-01 | -0.07 | -0.60 |
| <i>lpg1498</i> | ORF                                                                         |              | ORFs of unknown function (unique)       | 11.139 | 10.791 | 10.312 | 10.303 | 2.40E-01 | 9.85E-01 | -0.35 | -0.01 |
| <i>lpg1499</i> | ORF                                                                         |              | ORFs of unknown function (unique)       | 11.881 | 11.025 | 11.384 | 9.535  | 1.63E-02 | 9.49E-05 | -0.86 | -1.85 |
| <i>lpg1499</i> | ORF                                                                         |              | ORFs of unknown function (unique)       | 11.754 | 11.277 | 11.433 | 9.885  | 1.69E-01 | 1.49E-03 | -0.48 | -1.55 |
| <i>lpg1500</i> | oxidoreductase, short chain dehydrogenase/reductase (3-oxoacyl-[ac          |              | Lipid Metabolism                        | 10.317 | 10.759 | 10.668 | 9.804  | 3.71E-01 | 3.91E-01 | 0.44  | -0.86 |
| <i>lpg1500</i> | oxidoreductase, short chain dehydrogenase/reductase (3-oxoacyl-[ac          |              | Lipid Metabolism                        | 9.977  | 10.695 | 9.580  | 10.065 | 1.36E-01 | 3.28E-01 | 0.72  | 0.49  |
| <i>lpg1501</i> | GCN5-related N-acetyltransferase (ribosomal protein-alanine acetyltr        |              | Protein fate / hydrolases / secretion   | 9.736  | 6.584  | 9.333  | 7.342  | 3.82E-02 | 5.58E-02 | -3.15 | -1.99 |
| <i>lpg1501</i> | GCN5-related N-acetyltransferase (ribosomal protein-alanine acetyltr        |              | Protein fate / hydrolases / secretion   | 9.587  | 7.439  | 9.096  | 7.342  | 3.93E-03 | 3.55E-02 | -2.15 | -1.75 |
| <i>lpg1502</i> | dihydroliipoamide dehydrogenase                                             | <i>lpdA</i>  | Carbohydrate Metabolism, Amino Acid     | 13.655 | 12.026 | 13.070 | 12.622 | 6.43E-07 | 3.58E-02 | -1.63 | -0.45 |
| <i>lpg1502</i> | dihydroliipoamide dehydrogenase                                             | <i>lpdA</i>  | Carbohydrate Metabolism, Amino Acid     | 13.615 | 11.948 | 13.005 | 12.639 | 4.97E-06 | 7.39E-02 | -1.67 | -0.37 |
| <i>lpg1503</i> | pyruvate dehydrogenase E2 component (dihydroliipoamic                       | <i>aceF</i>  | Carbohydrate Metabolism                 | 12.312 | 11.090 | 11.722 | 11.772 | 7.69E-03 | 8.99E-01 | -1.22 | 0.05  |
| <i>lpg1503</i> | pyruvate dehydrogenase E2 component (dihydroliipoamic                       | <i>aceF</i>  | Carbohydrate Metabolism                 | 12.283 | 11.191 | 11.572 | 11.776 | 1.77E-02 | 6.54E-01 | -1.09 | 0.20  |
| <i>lpg1504</i> | pyruvate dehydrogenase E1 component oxidoreductase                          | <i>aceE</i>  | Carbohydrate Metabolism, Amino Acid     | 11.644 | 11.041 | 10.997 | 12.019 | 2.92E-01 | 2.06E-01 | -0.60 | 1.02  |
| <i>lpg1504</i> | pyruvate dehydrogenase E1 component oxidoreductase                          | <i>aceE</i>  | Carbohydrate Metabolism, Amino Acid     | 11.588 | 11.214 | 10.893 | 12.601 | 5.56E-01 | 1.99E-02 | -0.37 | 1.71  |
| <i>lpg1505</i> | conserved hypothetical protein                                              |              | Unknown / hypothetical proteins         | 12.678 | 12.861 | 11.902 | 13.143 | 3.92E-01 | 8.15E-04 | 0.18  | 1.24  |
| <i>lpg1505</i> | conserved hypothetical protein                                              |              | Unknown / hypothetical proteins         | 12.642 | 12.885 | 11.788 | 13.179 | 2.05E-01 | 3.92E-04 | 0.24  | 1.39  |
| <i>lpg1506</i> | inner membrane protein AmpE (beta lactamase induction?)                     |              | Named proteins of general function      | 10.465 | 10.998 | 10.432 | 10.338 | 5.76E-01 | 8.13E-01 | 0.53  | -0.09 |
| <i>lpg1506</i> | inner membrane protein AmpE (beta lactamase induction?)                     |              | Named proteins of general function      | 11.011 | 10.706 | 10.211 | 10.276 | 5.94E-01 | 8.82E-01 | -0.31 | 0.07  |
| <i>lpg1507</i> | sodium/hydrogen antiporter (glutathione regulated potassium efflux s        |              | Transport and binding                   | 11.105 | 11.203 | 9.892  | 11.308 | 7.81E-01 | 5.65E-03 | 0.10  | 1.42  |
| <i>lpg1507</i> | sodium/hydrogen antiporter (glutathione regulated potassium efflux s        |              | Transport and binding                   | 11.129 | 11.019 | 9.718  | 11.405 | 6.80E-01 | 2.02E-03 | -0.11 | 1.69  |
| <i>lpg1508</i> | rare lipoprotein A                                                          |              | Named proteins of general function      | 9.895  | 9.872  | 9.114  | 9.829  | 9.33E-01 | 5.15E-02 | -0.02 | 0.71  |
| <i>lpg1508</i> | rare lipoprotein A                                                          |              | Named proteins of general function      | 9.731  | 9.643  | 8.495  | 9.829  | 8.55E-01 | 1.55E-01 | -0.09 | 1.33  |
| <i>lpg1509</i> | D-alanyl-D-alanine carboxypeptidase                                         |              | Protein fate / hydrolases / secretion   | 13.081 | 11.907 | 11.593 | 12.174 | 3.27E-02 | 2.53E-01 | -1.17 | 0.58  |
| <i>lpg1509</i> | D-alanyl-D-alanine carboxypeptidase                                         |              | Protein fate / hydrolases / secretion   | 12.999 | 12.029 | 11.386 | 12.127 | 7.47E-02 | 1.86E-01 | -0.97 | 0.74  |
| <i>lpg1510</i> | D-alanine-aminotransferase (D-aspartate aminotransferase)                   |              | Amino Acid Metabolism, Metabolism o     | 12.598 | 9.856  | 9.961  | 10.953 | 5.16E-04 | 2.26E-01 | -2.74 | 0.99  |
| <i>lpg1510</i> | D-alanine-aminotransferase (D-aspartate aminotransferase)                   |              | Amino Acid Metabolism, Metabolism o     | 12.664 | 9.756  | 9.866  | 11.018 | 5.42E-04 | 2.78E-01 | -2.91 | 1.15  |
| <i>lpg1511</i> | lipopate-protein ligase B (lipopate biosynthesis protein B) (type I secreti |              | Transport and binding, Toxin productio  | 11.827 | 10.148 | 10.699 | 11.609 | 1.15E-02 | 8.42E-02 | -1.68 | 0.91  |
| <i>lpg1511</i> | lipopate-protein ligase B (lipopate biosynthesis protein B) (type I secreti |              | Transport and binding, Toxin productio  | 11.824 | 10.597 | 10.808 | 11.733 | 1.92E-02 | 4.88E-02 | -1.23 | 0.92  |
| <i>lpg1512</i> | DedA/PAP2 domain protein (integral membrane protein) (type I secre          |              | Transport and binding, Toxin productio  | 12.017 | 9.464  | 11.123 | 10.496 | 3.31E-06 | 1.60E-01 | -2.55 | -0.63 |
| <i>lpg1512</i> | DedA/PAP2 domain protein (integral membrane protein) (type I secre          |              | Transport and binding, Toxin productio  | 12.058 | 9.309  | 10.882 | 10.444 | 1.39E-05 | 4.10E-01 | -2.75 | -0.44 |
| <i>lpg1513</i> | type I secretion system LssZ                                                |              | Transport and binding, Toxin productio  | 11.774 | 11.084 | 11.757 | 10.075 | 3.18E-01 | 1.81E-04 | -0.69 | -1.68 |
| <i>lpg1513</i> | type I secretion system LssZ                                                |              | Transport and binding, Toxin productio  | 11.229 | 11.356 | 10.705 | 9.842  | 8.10E-01 | 1.18E-01 | 0.13  | -0.86 |
| <i>lpg1514</i> | lipoprotein (inner membrane protein) (type I secretion system LssA)         |              | Transport and binding, Toxin productio  | 9.343  | 9.456  | 9.392  | 9.090  | 8.28E-01 | 5.12E-01 | 0.11  | -0.30 |
| <i>lpg1514</i> | lipoprotein (inner membrane protein) (type I secretion system LssA)         |              | Transport and binding, Toxin productio  | 9.696  | 10.021 | 9.496  | 10.310 | 7.09E-01 | 2.14E-01 | 0.32  | 0.81  |
| <i>lpg1515</i> | toxin secretion ATP binding protein (ABC-type bacteriocin/antibiotic e)     |              | Transport and binding, Toxin productio  | 11.290 | 9.283  | 12.389 | 8.400  | 7.96E-03 | 1.53E-05 | -2.01 | -3.99 |
| <i>lpg1515</i> | toxin secretion ATP binding protein (ABC-type bacteriocin/antibiotic e)     |              | Transport and binding, Toxin productio  | 11.252 | 9.315  | 12.352 | 8.485  | 7.63E-04 | 7.73E-05 | -1.94 | -3.87 |

|                |                                                                            |             |                                                              |        |        |        |        |          |          |       |       |
|----------------|----------------------------------------------------------------------------|-------------|--------------------------------------------------------------|--------|--------|--------|--------|----------|----------|-------|-------|
| <i>lpg1516</i> | ABC transporter, ATP binding/permease fusion protein (toxin secretion)     |             | Transport and binding, Toxin production                      | 11.408 | 8.686  | 12.061 | 9.240  | 8.94E-05 | 6.40E-05 | -2.72 | -2.82 |
| <i>lpg1516</i> | ABC transporter, ATP binding/permease fusion protein (toxin secretion)     |             | Transport and binding, Toxin production                      | 11.458 | 8.878  | 12.049 | 9.689  | 1.79E-04 | 2.36E-04 | -2.58 | -2.36 |
| <i>lpg1517</i> | HlyD family secretion protein (hemolysin) (type I secretion system L)      |             | Toxin production / other pathogen function                   | 10.344 | 7.962  | 10.043 | 7.312  | 1.89E-05 | 6.50E-04 | -2.38 | -2.73 |
| <i>lpg1517</i> | HlyD family secretion protein (hemolysin) (type I secretion system L)      |             | Toxin production / other pathogen function                   | 10.235 | 6.648  | 10.046 | 7.733  | 1.39E-02 | 9.44E-03 | -3.59 | -2.31 |
| <i>lpg1518</i> | sensory box protein/GGDEF domain/EAL domain (type I secretion system)      |             | Protein fate / hydrolases / secretion, S                     | 8.632  | 7.416  | 9.925  | 6.152  | 4.51E-01 | 1.91E-03 | -1.22 | -3.77 |
| <i>lpg1518</i> | sensory box protein/GGDEF domain/EAL domain (type I secretion system)      |             | Protein fate / hydrolases / secretion, S                     | 9.634  | 8.740  | 10.338 | 7.319  | 7.70E-02 | 9.24E-03 | -0.89 | -3.02 |
| <i>lpg1519</i> | purine/pyrimidine phosphoribosyltransferase (hypoxanthine phosphor)        |             | Nucleotide Metabolism                                        | 12.675 | 10.564 | 10.496 | 11.195 | 1.11E-02 | 2.62E-01 | -2.11 | 0.70  |
| <i>lpg1519</i> | purine/pyrimidine phosphoribosyltransferase (hypoxanthine phosphor)        |             | Nucleotide Metabolism                                        | 12.570 | 11.375 | 10.052 | 11.557 | 2.26E-01 | 5.47E-02 | -1.19 | 1.50  |
| <i>lpg1520</i> | uncharacterized conserved hypothetical protein COG4517                     |             | Unknown / hypothetical proteins                              | 13.774 | 12.764 | 11.507 | 13.224 | 1.51E-01 | 1.55E-02 | -1.01 | 1.72  |
| <i>lpg1520</i> | uncharacterized conserved hypothetical protein COG4517                     |             | Unknown / hypothetical proteins                              | 13.343 | 12.781 | 11.216 | 13.385 | 4.65E-01 | 3.57E-03 | -0.56 | 2.17  |
| <i>lpg1521</i> | generic methyl-transferase                                                 |             | Named proteins of general function                           | 12.238 | 11.385 | 10.495 | 11.488 | 8.41E-02 | 8.82E-02 | -0.85 | 0.99  |
| <i>lpg1521</i> | generic methyl-transferase                                                 |             | Named proteins of general function                           | 12.438 | 11.526 | 10.556 | 11.575 | 1.63E-02 | 7.47E-02 | -0.91 | 1.02  |
| <i>lpg1522</i> | (type IV) pilus assembly protein PilB                                      | <i>pilB</i> | Transport and binding                                        | 11.149 | 9.932  | 13.363 | 9.229  | 2.42E-01 | 4.00E-04 | -1.22 | -4.13 |
| <i>lpg1522</i> | (type IV) pilus assembly protein PilB                                      | <i>pilB</i> | Transport and binding                                        | 10.626 | 9.613  | 13.072 | 9.231  | 2.08E-01 | 1.49E-04 | -1.01 | -3.84 |
| <i>lpg1523</i> | (type IV) pilus assembly protein PilC (bacterial type II secretion system) |             | Transport and binding, Protein fate / hydrolases / secretion | 10.286 | 9.168  | 12.771 | 9.249  | 4.52E-02 | 2.18E-04 | -1.12 | -3.52 |
| <i>lpg1523</i> | (type IV) pilus assembly protein PilC (bacterial type II secretion system) |             | Transport and binding, Protein fate / hydrolases / secretion | 10.366 | 9.874  | 12.757 | 9.597  | 4.58E-01 | 5.10E-04 | -0.49 | -3.16 |
| <i>lpg1524</i> | type 4 (IV) prepilin-like protein leader peptide processing                | <i>pilD</i> | Protein fate / hydrolases / secretion                        | 12.169 | 10.539 | 12.528 | 10.261 | 6.92E-04 | 1.96E-05 | -1.63 | -2.27 |
| <i>lpg1524</i> | type 4 (IV) prepilin-like protein leader peptide processing                | <i>pilD</i> | Protein fate / hydrolases / secretion                        | 12.186 | 10.473 | 12.476 | 10.280 | 7.14E-04 | 8.93E-06 | -1.71 | -2.20 |
| <i>lpg1525</i> | CAAX amino terminal protease family protein                                |             | Protein fate / hydrolases / secretion                        | 7.438  | 6.816  | 8.808  | 7.462  | 4.73E-01 | 8.12E-02 | -0.62 | -1.35 |
| <i>lpg1525</i> | CAAX amino terminal protease family protein                                |             | Protein fate / hydrolases / secretion                        | 7.633  | 7.385  | 8.134  | 8.257  | 5.74E-01 | 9.01E-01 | -0.25 | 0.12  |
| <i>lpg1526</i> | ORF                                                                        |             | ORFs of unknown function (unique)                            | 12.314 | 10.866 | 13.426 | 10.780 | 9.61E-04 | 1.27E-05 | -1.45 | -2.65 |
| <i>lpg1526</i> | ORF                                                                        |             | ORFs of unknown function (unique)                            | 12.331 | 10.788 | 13.427 | 10.877 | 1.04E-02 | 1.06E-05 | -1.54 | -2.55 |
| <i>lpg1527</i> | small ORF (151aa)                                                          |             | ORFs of unknown function (unique)                            | 11.538 | 10.582 | 11.792 | 9.909  | 5.27E-02 | 4.75E-04 | -0.96 | -1.88 |
| <i>lpg1527</i> | small ORF (151aa)                                                          |             | ORFs of unknown function (unique)                            | 11.510 | 11.039 | 11.677 | 10.352 | 2.86E-01 | 5.76E-03 | -0.47 | -1.33 |
| <i>lpg1528</i> | conserved hypothetical protein                                             |             | Unknown / hypothetical proteins                              | 11.007 | 12.397 | 10.050 | 11.517 | 1.10E-02 | 1.64E-02 | 1.39  | 1.47  |
| <i>lpg1528</i> | conserved hypothetical protein                                             |             | Unknown / hypothetical proteins                              | 11.108 | 12.492 | 10.129 | 11.774 | 2.47E-03 | 1.06E-03 | 1.38  | 1.65  |
| <i>lpg1529</i> | 2-methylcitrate dehydratase PrpD                                           | <i>prpD</i> | Carbohydrate Metabolism                                      | 10.676 | 13.387 | 9.873  | 12.973 | 6.59E-05 | 1.24E-04 | 2.71  | 3.10  |
| <i>lpg1529</i> | 2-methylcitrate dehydratase PrpD                                           | <i>prpD</i> | Carbohydrate Metabolism                                      | 10.433 | 13.358 | 9.165  | 12.936 | 5.07E-04 | 1.68E-03 | 2.93  | 3.77  |
| <i>lpg1530</i> | 2-methylcitrate synthase (citrate synthase PrpC)                           |             | Carbohydrate Metabolism                                      | 13.095 | 13.641 | 12.181 | 11.870 | 2.69E-02 | 6.35E-01 | 0.55  | -0.31 |
| <i>lpg1530</i> | 2-methylcitrate synthase (citrate synthase PrpC)                           |             | Carbohydrate Metabolism                                      | 13.097 | 13.635 | 12.192 | 12.445 | 9.76E-03 | 2.92E-01 | 0.54  | 0.25  |
| <i>lpg1531</i> | phenazine biosynthesis PhzF (oxidoreductase) (PCA synthesis?)              |             | Named proteins of general function                           | 12.015 | 9.241  | 12.853 | 11.124 | 6.22E-02 | 3.23E-02 | -2.77 | -1.73 |
| <i>lpg1531</i> | phenazine biosynthesis PhzF (oxidoreductase) (PCA synthesis?)              |             | Named proteins of general function                           | 12.065 | 10.835 | 12.807 | 11.705 | 2.76E-05 | 4.61E-03 | -1.23 | -1.10 |
| <i>lpg1532</i> | peptidase ? (oxidoreductase, FAD binding) (D-amino acid oxidase family)    |             | Protein fate / hydrolases / secretion                        | 10.730 | 6.893  | 9.825  | 8.378  | 8.53E-03 | 4.46E-02 | -3.84 | -1.45 |
| <i>lpg1532</i> | peptidase ? (oxidoreductase, FAD binding) (D-amino acid oxidase family)    |             | Protein fate / hydrolases / secretion                        | 10.893 | 9.072  | 9.648  | 9.335  | 2.76E-02 | 7.01E-01 | -1.82 | -0.31 |
| <i>lpg1533</i> | peptide transport protein (POT family) (proton/oligopeptide ydgR)          |             | Transport and binding                                        | 11.377 | 9.696  | 9.007  | 6.668  | 3.03E-02 | 4.35E-01 | -1.68 | 0.66  |
| <i>lpg1533</i> | peptide transport protein (POT family) (proton/oligopeptide ydgR)          |             | Transport and binding                                        | 11.031 | 9.778  | 8.398  | 9.978  | 2.14E-01 | 2.74E-01 | -1.25 | 1.58  |
| <i>lpg1534</i> | glutamate-1-semialdehyde-2,1-aminomutase                                   | <i>hemL</i> | Metabolism of Cofactors and Vitamins                         | 11.809 | 11.186 | 11.154 | 11.356 | 3.62E-01 | 7.18E-01 | -0.62 | 0.20  |
| <i>lpg1534</i> | glutamate-1-semialdehyde-2,1-aminomutase                                   | <i>hemL</i> | Metabolism of Cofactors and Vitamins                         | 12.088 | 11.523 | 11.211 | 11.682 | 2.10E-01 | 3.27E-01 | -0.56 | 0.47  |
| <i>lpg1535</i> | rubredoxin (rubredoxin-type Fe(Cys)4 protein)                              |             | Energy Metabolism                                            | 8.870  | 8.566  | 9.266  | 9.772  | 7.11E-01 | 2.40E-01 | -0.30 | 0.51  |
| <i>lpg1535</i> | rubredoxin (rubredoxin-type Fe(Cys)4 protein)                              |             | Energy Metabolism                                            | 8.590  | 9.542  | 9.508  | 10.220 | 1.74E-01 | 3.27E-01 | 0.95  | 0.71  |
| <i>lpg1536</i> | transmembrane protein                                                      |             | Unknown / hypothetical proteins                              | 10.281 | 9.855  | 8.867  | 9.252  | 2.58E-01 | 5.69E-01 | -0.43 | 0.38  |
| <i>lpg1536</i> | transmembrane protein                                                      |             | Unknown / hypothetical proteins                              | 10.188 | 9.736  | 9.307  | 9.731  | 2.03E-01 | 5.76E-01 | -0.45 | 0.42  |
| <i>lpg1537</i> | transport protein                                                          |             | Transport and binding                                        | 10.707 | 10.321 | 9.815  | 9.275  | 7.36E-02 | 3.60E-01 | -0.39 | -0.54 |
| <i>lpg1537</i> | transport protein                                                          |             | Transport and binding                                        | 10.436 | 10.522 | 9.615  | 9.243  | 7.92E-01 | 5.68E-01 | 0.09  | -0.37 |
| <i>lpg1538</i> | poly(A) polymerase I (tRNA nucleotidyltransferase/poly(A) polymerase I)    | <i>pcnB</i> | Transcription                                                | 12.398 | 7.880  | 9.968  | 8.979  | 1.29E-04 | 1.83E-01 | -4.52 | -0.99 |
| <i>lpg1538</i> | poly(A) polymerase I (tRNA nucleotidyltransferase/poly(A) polymerase I)    | <i>pcnB</i> | Transcription                                                | 12.520 | 8.067  | 9.908  | 8.926  | 8.02E-05 | 2.09E-01 | -4.45 | -0.98 |
| <i>lpg1539</i> | 2-amino-4-hydroxy-6-hydroxymethylidihydropteridine pyrophosphokin          |             | Metabolism of Cofactors and Vitamins                         | 10.173 | 10.031 | 9.918  | 10.595 | 6.68E-01 | 1.97E-01 | -0.14 | 0.68  |
| <i>lpg1539</i> | 2-amino-4-hydroxy-6-hydroxymethylidihydropteridine pyrophosphokin          |             | Metabolism of Cofactors and Vitamins                         | 10.175 | 9.852  | 9.916  | 10.603 | 3.91E-01 | 1.53E-01 | -0.32 | 0.69  |
| <i>lpg1540</i> | universal stress protein A (UspA)                                          |             | Detoxification / adaptation                                  | 10.712 | 9.559  | 11.185 | 9.260  | 5.75E-03 | 4.50E-02 | -1.15 | -1.93 |
| <i>lpg1540</i> | universal stress protein A (UspA)                                          |             | Detoxification / adaptation                                  | 10.810 | 9.371  | 11.232 | 9.458  | 2.92E-04 | 7.87E-02 | -1.44 | -1.77 |
| <i>lpg1541</i> | GTP-binding protein EngA                                                   | <i>engA</i> | Signal transduction / other regulatory function              | 11.517 | 11.511 | 9.748  | 12.075 | 9.86E-01 | 9.36E-04 | -0.01 | 2.33  |
| <i>lpg1541</i> | GTP-binding protein EngA                                                   | <i>engA</i> | Signal transduction / other regulatory function              | 11.439 | 11.540 | 9.170  | 12.108 | 7.98E-01 | 2.14E-03 | 0.10  | 2.94  |
| <i>lpg1542</i> | PQQ (pyrrolo quinoline) enzyme repeat domain protein (dehydrogenase)       |             | Named proteins of general function                           | 13.271 | 12.683 | 11.850 | 12.580 | 1.02E-01 | 4.95E-02 | -0.59 | 0.73  |
| <i>lpg1542</i> | PQQ (pyrrolo quinoline) enzyme repeat domain protein (dehydrogenase)       |             | Named proteins of general function                           | 13.215 | 12.678 | 11.760 | 12.577 | 1.91E-01 | 2.86E-02 | -0.54 | 0.82  |
| <i>lpg1543</i> | transmembrane protein                                                      |             | Unknown / hypothetical proteins                              | 12.822 | 12.365 | 11.918 | 12.592 | 2.98E-01 | 1.49E-01 | -0.46 | 0.67  |
| <i>lpg1543</i> | transmembrane protein                                                      |             | Unknown / hypothetical proteins                              | 12.889 | 12.299 | 11.856 | 12.605 | 1.93E-01 | 1.19E-01 | -0.59 | 0.75  |
| <i>lpg1544</i> | histidyl tRNA synthetase                                                   | <i>hisS</i> | Amino Acid Metabolism, Translation                           | 12.488 | 12.228 | 11.958 | 12.548 | 3.50E-01 | 2.41E-02 | -0.26 | 0.59  |
| <i>lpg1544</i> | histidyl tRNA synthetase                                                   | <i>hisS</i> | Amino Acid Metabolism, Translation                           | 12.459 | 12.194 | 11.934 | 12.563 | 4.00E-01 | 3.04E-02 | -0.26 | 0.63  |
| <i>lpg1545</i> | DNA-binding protein, putative                                              |             | Transcription factors / DNA binding protein                  | 11.504 | 12.034 | 10.892 | 11.167 | 3.11E-01 | 6.72E-01 | 0.53  | 0.27  |
| <i>lpg1545</i> | DNA-binding protein, putative                                              |             | Transcription factors / DNA binding protein                  | 11.525 | 11.716 | 10.624 | 11.538 | 7.39E-01 | 1.08E-01 | 0.19  | 0.91  |
| <i>lpg1546</i> | fimbrial biogenesis and twitching motility protein PilF                    |             | Transport and binding, Chemotaxis / motility                 | 11.598 | 11.261 | 9.896  | 11.801 | 3.75E-01 | 2.38E-02 | -0.34 | 1.91  |
| <i>lpg1546</i> | fimbrial biogenesis and twitching motility protein PilF                    |             | Transport and binding, Chemotaxis / motility                 | 11.667 | 11.321 | 9.736  | 11.657 | 3.64E-01 | 4.69E-02 | -0.35 | 1.92  |
| <i>lpg1547</i> | radical SAM enzyme, Cfr family                                             |             | Named proteins of general function                           | 12.068 | 10.527 | 10.668 | 11.921 | 4.86E-03 | 9.14E-02 | -1.54 | 1.25  |
| <i>lpg1547</i> | radical SAM enzyme, Cfr family                                             |             | Named proteins of general function                           | 11.923 | 11.174 | 10.691 | 12.016 | 1.46E-01 | 8.49E-02 | -0.75 | 1.32  |



|                |                                                                         |               |                                           |        |        |        |        |          |          |       |       |
|----------------|-------------------------------------------------------------------------|---------------|-------------------------------------------|--------|--------|--------|--------|----------|----------|-------|-------|
| <i>lpg1548</i> | nucleoside diphosphate kinase                                           | <i>ndk</i>    | Nucleotide Metabolism                     | 12.510 | 12.320 | 10.600 | 14.319 | 8.10E-01 | 1.51E-05 | -0.19 | 3.72  |
| <i>lpg1548</i> | nucleoside diphosphate kinase                                           | <i>ndk</i>    | Nucleotide Metabolism                     | 11.698 | 12.402 | 10.608 | 14.357 | 6.52E-01 | 1.07E-05 | 0.70  | 3.75  |
| <i>lpg1549</i> | ORF                                                                     |               | ORFs of unknown function (unique)         | 11.933 | 11.775 | 12.141 | 11.632 | 4.70E-01 | 1.78E-02 | -0.16 | -0.51 |
| <i>lpg1549</i> | ORF                                                                     |               | ORFs of unknown function (unique)         | 11.859 | 11.862 | 12.015 | 11.564 | 9.83E-01 | 5.19E-02 | 0.00  | -0.45 |
| <i>lpg1550</i> | tRNA-(ms2)io(6)a)-hydrolase (tRNA hydroxylase)                          |               | DNA/RNA degradation / restriction, Tr     | 11.093 | 9.922  | 8.297  | 10.140 | 1.77E-03 | 2.67E-02 | -1.17 | 1.84  |
| <i>lpg1550</i> | tRNA-(ms2)io(6)a)-hydrolase (tRNA hydroxylase)                          |               | DNA/RNA degradation / restriction, Tr     | 10.607 | 10.051 | 8.466  | 10.386 | 3.68E-01 | 7.46E-03 | -0.56 | 1.92  |
| <i>lpg1551</i> | ORF                                                                     |               | ORFs of unknown function (unique)         | 13.326 | 14.098 | 14.541 | 11.642 | 1.70E-02 | 4.80E-07 | 0.77  | -2.90 |
| <i>lpg1551</i> | ORF                                                                     |               | ORFs of unknown function (unique)         | 13.342 | 14.134 | 14.511 | 11.699 | 2.56E-02 | 5.34E-07 | 0.79  | -2.81 |
| <i>lpg1552</i> | UDP-2,3-diacetylglucosamine hydrolase                                   |               | Metabolism of Complex Carbohydrate:       | 13.151 | 11.171 | 10.929 | 11.377 | 7.73E-04 | 4.29E-01 | -1.98 | 0.45  |
| <i>lpg1552</i> | UDP-2,3-diacetylglucosamine hydrolase                                   |               | Metabolism of Complex Carbohydrate:       | 13.127 | 10.946 | 10.543 | 11.365 | 3.31E-04 | 2.44E-01 | -2.18 | 0.82  |
| <i>lpg1553</i> | septum site determining protein MinC (FtsZ assembly int                 | <i>minC</i>   | Chemotaxis / motility / cell division, Si | 14.051 | 12.838 | 12.233 | 12.925 | 1.71E-03 | 1.32E-01 | -1.21 | 0.69  |
| <i>lpg1553</i> | septum site determining protein MinC (FtsZ assembly int                 | <i>minC</i>   | Chemotaxis / motility / cell division, Si | 14.033 | 12.929 | 12.211 | 12.954 | 3.02E-03 | 1.11E-01 | -1.10 | 0.74  |
| <i>lpg1554</i> | long chain fatty acid-CoA ligase                                        | <i>fadD-1</i> | Lipid Metabolism                          | 11.369 | 11.363 | 11.357 | 10.724 | 9.87E-01 | 1.52E-01 | -0.01 | -0.63 |
| <i>lpg1554</i> | long chain fatty acid-CoA ligase                                        | <i>fadD-1</i> | Lipid Metabolism                          | 10.086 | 11.207 | 10.108 | 10.884 | 1.23E-01 | 1.78E-01 | 1.12  | 0.78  |
| <i>lpg1555</i> | arginine 3rd transport system periplasmic binding protein               | <i>artJ</i>   | Transport and binding                     | 9.142  | 10.459 | 10.040 | 9.958  | 1.41E-01 | 9.16E-01 | 1.32  | -0.08 |
| <i>lpg1555</i> | arginine 3rd transport system periplasmic binding protein               | <i>artJ</i>   | Transport and binding                     | 9.196  | 10.535 | 8.996  | 10.275 | 1.62E-01 | 3.49E-01 | 1.34  | 1.28  |
| <i>lpg1556</i> | MutT/nudix family protein (phosphohydrolase)                            |               | Named proteins of general function        | 10.327 | 9.237  | 9.206  | 9.506  | 3.88E-02 | 4.47E-01 | -1.09 | 0.30  |
| <i>lpg1556</i> | MutT/nudix family protein (phosphohydrolase)                            |               | Named proteins of general function        | 10.444 | 9.272  | 8.685  | 9.413  | 9.27E-03 | 1.82E-01 | -1.17 | 0.73  |
| <i>lpg1557</i> | para-aminobenzoate synthase, component I                                |               | Carbohydrate Metabolism, Metabolisr       | 9.983  | 10.030 | 8.978  | 10.258 | 8.50E-01 | 1.08E-02 | 0.05  | 1.28  |
| <i>lpg1557</i> | para-aminobenzoate synthase, component I                                |               | Carbohydrate Metabolism, Metabolisr       | 9.782  | 9.789  | 8.883  | 10.578 | 9.84E-01 | 1.77E-03 | 0.01  | 1.69  |
| <i>lpg1558</i> | pyruvate dehydrogenase E1 alpha subunit (pyruvate/2-oxoglutarate d      |               | Carbohydrate Metabolism, Amino Acid       | 11.947 | 12.026 | 10.639 | 11.921 | 8.45E-01 | 1.05E-01 | 0.08  | 1.28  |
| <i>lpg1558</i> | pyruvate dehydrogenase E1 alpha subunit (pyruvate/2-oxoglutarate d      |               | Carbohydrate Metabolism, Amino Acid       | 11.863 | 11.945 | 10.447 | 11.985 | 8.58E-01 | 6.03E-02 | 0.08  | 1.54  |
| <i>lpg1559</i> | pyruvate dehydrogenase E1 beta subunit (pyruvate decarboxylase E'       |               | Carbohydrate Metabolism, Amino Acid       | 13.080 | 11.891 | 10.910 | 12.687 | 5.77E-02 | 2.33E-02 | -1.19 | 1.78  |
| <i>lpg1559</i> | pyruvate dehydrogenase E1 beta subunit (pyruvate decarboxylase E'       |               | Carbohydrate Metabolism, Amino Acid       | 13.198 | 12.030 | 10.849 | 12.856 | 2.83E-02 | 1.28E-02 | -1.17 | 2.01  |
| <i>lpg1560</i> | dihydrolipoamide acetyltransferase (pyruvate/2-oxoglutarate dehydro     |               | Carbohydrate Metabolism                   | 14.224 | 13.693 | 12.208 | 13.638 | 2.91E-01 | 2.00E-02 | -0.53 | 1.43  |
| <i>lpg1560</i> | dihydrolipoamide acetyltransferase (pyruvate/2-oxoglutarate dehydro     |               | Carbohydrate Metabolism                   | 14.344 | 13.732 | 12.182 | 13.624 | 2.72E-01 | 1.93E-02 | -0.61 | 1.44  |
| <i>lpg1561</i> | potassium efflux system KefA                                            |               | Transport and binding                     | 10.166 | 10.194 | 8.827  | 8.985  | 9.62E-01 | 8.32E-01 | 0.03  | 0.16  |
| <i>lpg1561</i> | potassium efflux system KefA                                            |               | Transport and binding                     | 9.883  | 9.804  | 8.546  | 9.603  | 9.14E-01 | 2.82E-01 | -0.08 | 1.06  |
| <i>lpg1562</i> | mercuric reductase (mercury(II)reductase) (dihydrolipoan <i>merA1</i>   |               | Detoxification / adaptation, Carbohydr    | 10.432 | 9.775  | 10.252 | 8.968  | 1.21E-01 | 2.87E-02 | -0.66 | -1.28 |
| <i>lpg1562</i> | mercuric reductase (mercury(II)reductase) (dihydrolipoan <i>merA1</i>   |               | Detoxification / adaptation, Carbohydr    | 10.579 | 10.008 | 10.342 | 9.072  | 2.71E-01 | 3.58E-03 | -0.57 | -1.27 |
| <i>lpg1563</i> | ORF                                                                     |               | ORFs of unknown function (unique)         | 10.132 | 10.765 | 10.727 | 9.932  | 2.77E-01 | 6.84E-02 | 0.63  | -0.80 |
| <i>lpg1563</i> | ORF                                                                     |               | ORFs of unknown function (unique)         | 10.083 | 11.090 | 10.697 | 10.305 | 1.33E-01 | 2.93E-01 | 1.01  | -0.39 |
| <i>lpg1564</i> | membrane protein (nodulin 21?)                                          |               | Named proteins of general function        | 8.791  | 7.488  | 9.787  | 7.145  | 1.24E-01 | 2.65E-03 | -1.30 | -2.64 |
| <i>lpg1564</i> | membrane protein (nodulin 21?)                                          |               | Named proteins of general function        | 9.105  | 8.431  | 10.105 | 7.718  | 6.01E-02 | 2.87E-03 | -0.67 | -2.39 |
| <i>lpg1565</i> | thiamine biosynthesis protein NMT-1 (periplasmic ABC tr. <i>thi3</i>    |               | Metabolism of Cofactors and Vitamins      | 9.611  | 10.730 | 10.082 | 10.452 | 6.78E-03 | 3.73E-01 | 1.12  | 0.37  |
| <i>lpg1565</i> | thiamine biosynthesis protein NMT-1 (periplasmic ABC tr. <i>thi3</i>    |               | Metabolism of Cofactors and Vitamins      | 9.937  | 10.752 | 10.111 | 10.660 | 3.26E-02 | 1.56E-01 | 0.82  | 0.55  |
| <i>lpg1566</i> | thiamine biosynthesis oxidoreductase ThiO (D-amino acid oxidase fla     |               | Metabolism of Cofactors and Vitamins      | 9.225  | 8.127  | 9.524  | 8.643  | 2.77E-01 | 2.15E-01 | -1.10 | -0.88 |
| <i>lpg1566</i> | thiamine biosynthesis oxidoreductase ThiO (D-amino acid oxidase fla     |               | Metabolism of Cofactors and Vitamins      | 9.052  | 8.542  | 9.358  | 8.577  | 5.82E-01 | 3.30E-01 | -0.51 | -0.78 |
| <i>lpg1567</i> | thiamine (thiazole) biosynthesis protein ThiG (hydroxyme <i>thiG</i>    |               | Metabolism of Cofactors and Vitamins      | 8.572  | 8.714  | 8.852  | 8.492  | 8.46E-01 | 6.61E-01 | 0.14  | -0.36 |
| <i>lpg1567</i> | thiamine (thiazole) biosynthesis protein ThiG (hydroxyme <i>thiG</i>    |               | Metabolism of Cofactors and Vitamins      | 8.617  | 9.189  | 8.725  | 8.411  | 4.71E-01 | 8.22E-01 | 0.57  | -0.31 |
| <i>lpg1568</i> | phosphomethylpyrimidine kinase ThiD/thiamin-phosphat <i>thiDE</i>       |               | Metabolism of Cofactors and Vitamins      | 9.458  | 9.386  | 9.321  | 9.509  | 8.72E-01 | 5.10E-01 | -0.07 | 0.19  |
| <i>lpg1568</i> | phosphomethylpyrimidine kinase ThiD/thiamin-phosphat <i>thiDE</i>       |               | Metabolism of Cofactors and Vitamins      | 9.670  | 9.711  | 9.241  | 9.891  | 9.12E-01 | 2.17E-01 | 0.04  | 0.65  |
| <i>lpg1569</i> | sulfurylase (ThiF family protein) (molybdopterin biosynthesis protein I |               | Metabolism of Cofactors and Vitamins      | 8.478  | 8.451  | 8.642  | 8.868  | 9.79E-01 | 8.13E-01 | -0.03 | 0.23  |
| <i>lpg1569</i> | sulfurylase (ThiF family protein) (molybdopterin biosynthesis protein I |               | Metabolism of Cofactors and Vitamins      | 8.300  | 8.083  | 8.131  | 9.057  | 8.23E-01 | 4.13E-01 | -0.22 | 0.93  |
| <i>lpg1570</i> | 3'-nucleotidase/nuclease (endonuclease)                                 |               | DNA/RNA degradation / restriction         | 10.733 | 9.344  | 10.144 | 10.673 | 8.80E-03 | 3.01E-01 | -1.39 | 0.53  |
| <i>lpg1570</i> | 3'-nucleotidase/nuclease (endonuclease)                                 |               | DNA/RNA degradation / restriction         | 10.894 | 8.899  | 9.950  | 10.781 | 1.53E-02 | 1.70E-01 | -0.99 | 0.83  |
| <i>lpg1571</i> | ToIB colicin import protein                                             | <i>toiB</i>   | Transport and binding                     | 11.195 | 10.763 | 10.577 | 10.692 | 3.14E-01 | 8.88E-01 | -0.43 | 0.12  |
| <i>lpg1571</i> | ToIB colicin import protein                                             | <i>toiB</i>   | Transport and binding                     | 11.133 | 10.540 | 10.490 | 11.104 | 3.10E-02 | 2.92E-01 | -0.59 | 0.61  |
| <i>lpg1572</i> | ToIA colicin import membrane protein                                    | <i>toiA</i>   | Transport and binding                     | 11.567 | 10.744 | 10.932 | 11.611 | 7.14E-04 | 3.42E-02 | -0.82 | 0.68  |
| <i>lpg1572</i> | ToIA colicin import membrane protein                                    | <i>toiA</i>   | Transport and binding                     | 11.406 | 10.979 | 10.772 | 11.691 | 2.02E-01 | 1.57E-02 | -0.43 | 0.92  |
| <i>lpg1573</i> | biopolymer transport protein ToIR                                       | <i>toiR</i>   | Transport and binding                     | 11.173 | 11.986 | 10.827 | 11.758 | 3.38E-03 | 2.25E-02 | 0.81  | 0.93  |
| <i>lpg1573</i> | biopolymer transport protein ToIR                                       | <i>toiR</i>   | Transport and binding                     | 10.899 | 12.443 | 10.708 | 12.441 | 3.67E-02 | 3.53E-02 | 1.54  | 1.73  |
| <i>lpg1574</i> | biopolymer transport protein ToIQ (colicin import protein)              | <i>toiQ</i>   | Transport and binding                     | 10.931 | 12.619 | 11.082 | 11.749 | 1.71E-05 | 6.84E-03 | 1.69  | 0.67  |
| <i>lpg1574</i> | biopolymer transport protein ToIQ (colicin import protein)              | <i>toiQ</i>   | Transport and binding                     | 11.052 | 12.792 | 10.783 | 11.963 | 9.55E-07 | 2.27E-02 | 1.74  | 1.18  |
| <i>lpg1575</i> | esterase (4-hydroxybenzoyl-CoA thioesterase family active site)         |               | Biodegradation of Xenobiotics             | 11.894 | 12.467 | 10.958 | 11.995 | 1.66E-01 | 4.36E-03 | 0.57  | 1.04  |
| <i>lpg1575</i> | esterase (4-hydroxybenzoyl-CoA thioesterase family active site)         |               | Biodegradation of Xenobiotics             | 11.911 | 12.332 | 10.797 | 11.862 | 2.99E-01 | 1.25E-02 | 0.42  | 1.06  |
| <i>lpg1576</i> | Holliday junction DNA helicase RuvB                                     | <i>ruvB</i>   | Replication and Repair                    | 12.153 | 11.377 | 11.123 | 11.521 | 1.68E-02 | 3.28E-01 | -0.78 | 0.40  |
| <i>lpg1576</i> | Holliday junction DNA helicase RuvB                                     | <i>ruvB</i>   | Replication and Repair                    | 11.962 | 11.380 | 11.134 | 11.568 | 1.07E-01 | 1.91E-01 | -0.58 | 0.43  |
| <i>lpg1577</i> | RNA polymerase sigma E factor RpoE (RNA polymerase <i>rpoE</i>          |               | Transcription factors / DNA binding prc   | 9.930  | 8.431  | 12.010 | 7.084  | 6.93E-02 | 3.72E-04 | -1.50 | -4.93 |
| <i>lpg1577</i> | RNA polymerase sigma E factor RpoE (RNA polymerase <i>rpoE</i>          |               | Transcription factors / DNA binding prc   | 9.989  | 8.787  | 12.044 | 7.552  | 1.03E-01 | 2.03E-03 | -1.20 | -4.49 |
| <i>lpg1578</i> | small ORF (149aa)                                                       |               | ORFs of unknown function (unique)         | 10.715 | 7.934  | 8.129  | 7.578  | 1.41E-04 | 5.19E-01 | -2.78 | -0.55 |
| <i>lpg1578</i> | small ORF (149aa)                                                       |               | ORFs of unknown function (unique)         | 10.505 | 8.244  | 8.191  | 8.531  | 4.73E-02 | 7.87E-01 | -2.26 | 0.34  |
| <i>lpg1579</i> | glycine cleavage T protein (aminomethyl transferase)                    |               | Metabolism of Cofactors and Vitamins      | 11.312 | 10.697 | 10.641 | 10.601 | 1.19E-01 | 9.42E-01 | -0.61 | -0.04 |
| <i>lpg1579</i> | glycine cleavage T protein (aminomethyl transferase)                    |               | Metabolism of Cofactors and Vitamins      | 11.285 | 11.349 | 10.841 | 11.633 | 9.45E-01 | 4.17E-01 | 0.06  | 0.79  |

|                |                                                                        |              |                                          |        |        |        |        |          |          |       |       |
|----------------|------------------------------------------------------------------------|--------------|------------------------------------------|--------|--------|--------|--------|----------|----------|-------|-------|
| <i>lpg1580</i> | cytochrome b-561 transmembrane protein                                 |              | Energy Metabolism                        | 12.642 | 10.435 | 13.052 | 10.336 | 1.26E-06 | 2.46E-06 | -2.21 | -2.72 |
| <i>lpg1580</i> | cytochrome b-561 transmembrane protein                                 |              | Energy Metabolism                        | 12.613 | 10.481 | 13.019 | 10.654 | 6.49E-04 | 4.85E-05 | -2.13 | -2.37 |
| <i>lpg1581</i> | NAD-glutamate dehydrogenase                                            |              | Energy Metabolism, Amino Acid Metab      | 13.791 | 13.255 | 14.217 | 13.029 | 6.76E-03 | 3.46E-06 | -0.54 | -1.19 |
| <i>lpg1581</i> | NAD-glutamate dehydrogenase                                            |              | Energy Metabolism, Amino Acid Metab      | 13.820 | 13.264 | 14.203 | 13.041 | 8.76E-03 | 8.73E-06 | -0.56 | -1.16 |
| <i>lpg1582</i> | hypothetical COG1376                                                   |              | Unknown / hypothetical proteins          | 11.753 | 9.964  | 12.592 | 10.934 | 9.80E-02 | 2.08E-04 | -1.79 | -1.66 |
| <i>lpg1582</i> | hypothetical COG1376                                                   |              | Unknown / hypothetical proteins          | 11.763 | 11.072 | 12.600 | 11.282 | 4.80E-02 | 7.17E-04 | -0.69 | -1.32 |
| <i>lpg1583</i> | succinate semialdehyde dehydrogenase (NADP+) (aldehyde dehydrog        |              | Amino Acid Metabolism, Carbohydrate      | 10.714 | 10.538 | 12.802 | 10.749 | 8.21E-01 | 1.57E-02 | -0.18 | -2.05 |
| <i>lpg1583</i> | succinate semialdehyde dehydrogenase (NADP+) (aldehyde dehydrog        |              | Amino Acid Metabolism, Carbohydrate      | 10.930 | 10.687 | 12.861 | 11.596 | 7.07E-01 | 8.04E-02 | -0.24 | -1.27 |
| <i>lpg1584</i> | (CDP-alcohol) phosphatidyltransferase (phosphatidylcholine synthase    |              | Amino Acid Metabolism, Metabolism o      | 11.619 | 11.797 | 10.365 | 11.877 | 3.90E-01 | 2.66E-03 | 0.18  | 1.51  |
| <i>lpg1584</i> | (CDP-alcohol) phosphatidyltransferase (phosphatidylcholine synthase    |              | Amino Acid Metabolism, Metabolism o      | 11.539 | 11.845 | 10.249 | 12.055 | 2.79E-01 | 3.55E-04 | 0.31  | 1.81  |
| <i>lpg1585</i> | small ORF (162aa) conserved domain protein; enhanced entry protei      |              | Toxin production / other pathogen func   | 11.874 | 10.342 | 10.114 | 10.884 | 7.47E-03 | 2.47E-01 | -1.53 | 0.77  |
| <i>lpg1585</i> | small ORF (162aa) conserved domain protein; enhanced entry protei      |              | Toxin production / other pathogen func   | 11.550 | 11.194 | 9.718  | 11.246 | 6.22E-01 | 5.43E-02 | -0.36 | 1.53  |
| <i>lpg1586</i> | small ORF (125aa)                                                      |              | ORFs of unknown function (unique)        | 12.142 | 10.072 | 11.850 | 9.560  | 7.15E-06 | 3.98E-05 | -2.07 | -2.29 |
| <i>lpg1586</i> | small ORF (125aa)                                                      |              | ORFs of unknown function (unique)        | 12.080 | 9.977  | 11.768 | 9.672  | 2.14E-04 | 1.08E-04 | -2.10 | -2.10 |
| <i>lpg1587</i> | hypothetical (thioredoxin family?)                                     |              | Unknown / hypothetical proteins          | 10.320 | 8.756  | 8.114  | 8.034  | 8.46E-03 | 9.57E-01 | -1.56 | -0.08 |
| <i>lpg1587</i> | hypothetical (thioredoxin family?)                                     |              | Unknown / hypothetical proteins          | 10.313 | 9.206  | 9.070  | 9.243  | 8.42E-03 | 9.12E-01 | -1.11 | 0.17  |
| <i>lpg1588</i> | ORF                                                                    | <i>legC6</i> | ORFs of unknown function (unique)        | 12.109 | 12.842 | 12.777 | 10.829 | 7.20E-02 | 3.31E-05 | 0.73  | -1.95 |
| <i>lpg1588</i> | ORF                                                                    | <i>legC6</i> | ORFs of unknown function (unique)        | 12.106 | 12.681 | 12.757 | 11.348 | 2.02E-01 | 4.02E-03 | 0.58  | -1.41 |
| <i>lpg1589</i> | 50S ribosomal protein L9                                               | <i>rplI</i>  | Translation                              | 9.755  | 9.205  | 9.929  | 9.547  | 4.97E-01 | 6.23E-01 | -0.55 | -0.38 |
| <i>lpg1589</i> | 50S ribosomal protein L9                                               | <i>rplI</i>  | Translation                              | 10.155 | 9.449  | 9.340  | 9.869  | 1.96E-01 | 5.27E-01 | -0.71 | 0.53  |
| <i>lpg1590</i> | membrane protein                                                       |              | Named proteins of general function       | 14.028 | 12.158 | 11.522 | 12.459 | 8.60E-04 | 2.12E-01 | -1.87 | 0.94  |
| <i>lpg1590</i> | membrane protein                                                       |              | Named proteins of general function       | 14.008 | 12.173 | 11.468 | 12.493 | 7.09E-04 | 1.80E-01 | -1.84 | 1.02  |
| <i>lpg1591</i> | 30S ribosomal protein S18                                              | <i>rpsR</i>  | Translation                              | 14.063 | 13.574 | 11.444 | 13.913 | 4.29E-01 | 4.63E-03 | -0.49 | 2.47  |
| <i>lpg1591</i> | 30S ribosomal protein S18                                              | <i>rpsR</i>  | Translation                              | 13.943 | 13.590 | 11.316 | 13.961 | 6.13E-01 | 5.47E-03 | -0.35 | 2.64  |
| <i>lpg1592</i> | 30S ribosomal protein S6                                               | <i>rpsF</i>  | Translation                              | 14.601 | 13.987 | 11.234 | 14.542 | 4.43E-01 | 2.78E-03 | -0.61 | 3.31  |
| <i>lpg1592</i> | 30S ribosomal protein S6                                               | <i>rpsF</i>  | Translation                              | 14.198 | 14.003 | 11.129 | 14.617 | 8.17E-01 | 2.00E-03 | -0.19 | 3.49  |
| <i>lpg1593</i> | carbon storage regulator?                                              |              | Named proteins of general function       | 13.112 | 11.499 | 10.138 | 11.649 | 1.62E-02 | 6.17E-02 | -1.61 | 1.51  |
| <i>lpg1593</i> | carbon storage regulator?                                              |              | Named proteins of general function       | 13.035 | 11.514 | 9.563  | 11.689 | 5.96E-02 | 4.23E-02 | -1.52 | 2.13  |
| <i>lpg1594</i> | ORF                                                                    |              | ORFs of unknown function (unique)        | 11.466 | 9.608  | 10.279 | 9.800  | 4.63E-03 | 5.07E-01 | -1.86 | -0.48 |
| <i>lpg1594</i> | ORF                                                                    |              | ORFs of unknown function (unique)        | 11.409 | 9.429  | 10.093 | 9.716  | 4.61E-03 | 5.44E-01 | -1.98 | -0.38 |
| <i>lpg1595</i> | hypothetical (LysM domain protein) periplasmic protein, cell wall degr |              | Named proteins of general function       | 9.712  | 8.895  | 9.696  | 10.140 | 4.26E-01 | 4.26E-01 | -0.82 | 0.44  |
| <i>lpg1595</i> | hypothetical (LysM domain protein) periplasmic protein, cell wall degr |              | Named proteins of general function       | 9.484  | 10.330 | 9.527  | 11.330 | 2.84E-01 | 1.66E-02 | 0.85  | 1.80  |
| <i>lpg1596</i> | enoyl CoA hydratase (alpha subunit of fatty acid oxidatior <i>yfcX</i> |              | Lipid Metabolism                         | 13.481 | 14.426 | 13.989 | 12.987 | 2.34E-02 | 4.31E-02 | 0.94  | -1.00 |
| <i>lpg1596</i> | enoyl CoA hydratase (alpha subunit of fatty acid oxidatior <i>yfcX</i> |              | Lipid Metabolism                         | 13.573 | 14.609 | 13.996 | 13.208 | 4.45E-04 | 7.81E-03 | 1.04  | -0.79 |
| <i>lpg1597</i> | thiolase (beta subunit of fatty acid oxidation complex)                |              | Lipid Metabolism, Amino Acid Metabol     | 12.970 | 14.319 | 13.911 | 12.881 | 2.81E-04 | 2.01E-03 | 1.35  | -1.03 |
| <i>lpg1597</i> | thiolase (beta subunit of fatty acid oxidation complex)                |              | Lipid Metabolism, Amino Acid Metabol     | 12.972 | 14.358 | 13.914 | 12.937 | 2.37E-04 | 1.38E-03 | 1.39  | -0.98 |
| <i>lpg1598</i> | ORF                                                                    |              | ORFs of unknown function (unique)        | 9.273  | 8.564  | 8.655  | 8.417  | 2.40E-01 | 8.40E-01 | -0.71 | -0.24 |
| <i>lpg1598</i> | ORF                                                                    |              | ORFs of unknown function (unique)        | 9.212  | 8.619  | 8.605  | 8.512  | 4.03E-01 | 9.26E-01 | -0.59 | -0.09 |
| <i>lpg1599</i> | small ORF (68aa) hypothetical                                          |              | Unknown / hypothetical proteins          | 8.330  | 8.036  | 8.762  | 8.923  | 6.28E-01 | 7.33E-01 | -0.29 | 0.16  |
| <i>lpg1599</i> | small ORF (68aa) hypothetical                                          |              | Unknown / hypothetical proteins          | 8.966  | 9.225  | 9.168  | 9.867  | 4.79E-01 | 1.65E-01 | 0.26  | 0.70  |
| <i>lpg1600</i> | tRNA-Ser                                                               |              | tRNA                                     | 12.529 | 12.252 | 12.776 | 12.523 | 7.02E-01 | 7.15E-01 | -0.28 | -0.25 |
| <i>lpg1600</i> | tRNA-Ser                                                               |              | tRNA                                     | 12.516 | 12.187 | 12.760 | 12.736 | 6.39E-01 | 9.55E-01 | -0.33 | -0.02 |
| <i>lpg1601</i> | tRNA-Arg                                                               |              | tRNA                                     | 11.812 | 9.882  | 10.535 | 10.815 | 2.52E-02 | 6.51E-01 | -1.93 | 0.28  |
| <i>lpg1601</i> | tRNA-Arg                                                               |              | tRNA                                     | 11.678 | 10.452 | 9.942  | 10.928 | 4.56E-02 | 2.02E-01 | -1.23 | 0.99  |
| <i>lpg1602</i> | FLJ00180 protein                                                       | <i>legL2</i> | Unknown / hypothetical proteins          | 10.279 | 9.706  | 9.634  | 10.011 | 8.46E-02 | 3.30E-01 | -0.57 | 0.38  |
| <i>lpg1602</i> | FLJ00180 protein                                                       | <i>legL2</i> | Unknown / hypothetical proteins          | 10.338 | 9.762  | 9.484  | 10.326 | 2.95E-01 | 1.64E-01 | -0.58 | 0.84  |
| <i>lpg1603</i> | hypothetical                                                           |              | Unknown / hypothetical proteins          | 10.867 | 11.086 | 10.931 | 10.473 | 2.60E-01 | 8.62E-02 | 0.22  | -0.46 |
| <i>lpg1603</i> | hypothetical                                                           |              | Unknown / hypothetical proteins          | 10.953 | 11.250 | 10.677 | 10.444 | 9.40E-02 | 1.96E-01 | 0.30  | -0.23 |
| <i>lpg1604</i> | hypothetical                                                           |              | Unknown / hypothetical proteins          | 9.771  | 9.532  | 10.242 | 10.073 | 5.83E-01 | 3.79E-01 | -0.24 | -0.17 |
| <i>lpg1604</i> | hypothetical                                                           |              | Unknown / hypothetical proteins          | 9.990  | 9.439  | 9.823  | 9.698  | 5.10E-02 | 7.86E-01 | -0.55 | -0.13 |
| <i>lpg1605</i> | hypothetical                                                           |              | Unknown / hypothetical proteins          | 7.476  | 10.802 | 9.164  | 10.209 | 8.66E-06 | 5.63E-02 | 3.33  | 1.05  |
| <i>lpg1605</i> | hypothetical                                                           |              | Unknown / hypothetical proteins          | 7.259  | 10.554 | 8.857  | 10.157 | 3.83E-06 | 8.06E-02 | 3.30  | 1.30  |
| <i>lpg1606</i> | conserved hypothetical protein                                         |              | Unknown / hypothetical proteins          | 11.731 | 10.324 | 9.801  | 10.534 | 3.82E-03 | 1.75E-01 | -1.41 | 0.73  |
| <i>lpg1606</i> | conserved hypothetical protein                                         |              | Unknown / hypothetical proteins          | 11.171 | 10.338 | 8.889  | 11.058 | 3.17E-01 | 6.46E-02 | -0.83 | 2.17  |
| <i>lpg1607</i> | phosphoenolpyruvate carboxylase                                        | <i>capP</i>  | Carbohydrate Metabolism, Energy Me       | 8.321  | 8.676  | 8.164  | 8.594  | 3.87E-01 | 1.97E-01 | 0.36  | 0.43  |
| <i>lpg1607</i> | phosphoenolpyruvate carboxylase                                        | <i>capP</i>  | Carbohydrate Metabolism, Energy Me       | 8.550  | 8.869  | 8.000  | 9.005  | 5.78E-01 | 5.26E-02 | 0.32  | 1.01  |
| <i>lpg1608</i> | MutT/nudix family protein                                              |              | Named proteins of general function       | 8.332  | 9.104  | 9.484  | 9.077  | 4.54E-03 | 2.68E-01 | 0.77  | -0.41 |
| <i>lpg1608</i> | MutT/nudix family protein                                              |              | Named proteins of general function       | 8.497  | 9.175  | 9.795  | 9.433  | 4.62E-02 | 3.37E-01 | 0.68  | -0.36 |
| <i>lpg1609</i> | gamma-glutamyl phosphate reductase                                     |              | Amino Acid Metabolism                    | 10.918 | 10.681 | 10.101 | 10.446 | 6.11E-01 | 5.11E-01 | -0.24 | 0.34  |
| <i>lpg1609</i> | gamma-glutamyl phosphate reductase                                     |              | Amino Acid Metabolism                    | 10.968 | 10.827 | 9.075  | 9.675  | 7.05E-01 | 7.54E-01 | -0.14 | 0.60  |
| <i>lpg1610</i> | glutamate-5-kinase (gamma-glutamyl kinase)                             | <i>proB</i>  | Amino Acid Metabolism                    | 9.052  | 8.599  | 8.690  | 8.051  | 5.09E-01 | 4.09E-01 | -0.45 | -0.64 |
| <i>lpg1610</i> | glutamate-5-kinase (gamma-glutamyl kinase)                             | <i>proB</i>  | Amino Acid Metabolism                    | 8.519  | 8.360  | 7.884  | 8.346  | 8.79E-01 | 6.27E-01 | -0.16 | 0.46  |
| <i>lpg1611</i> | transcriptional regulator, MerR family (mercury resistance)            |              | Detoxification / adaptation, Transcripti | 9.662  | 11.119 | 9.476  | 10.416 | 2.15E-04 | 1.10E-02 | 1.46  | 0.94  |
| <i>lpg1611</i> | transcriptional regulator, MerR family (mercury resistance)            |              | Detoxification / adaptation, Transcripti | 9.395  | 11.082 | 9.047  | 10.504 | 1.27E-04 | 5.67E-02 | 1.69  | 1.46  |

|                |                                                                             |                                                       |        |        |        |        |          |          |       |       |
|----------------|-----------------------------------------------------------------------------|-------------------------------------------------------|--------|--------|--------|--------|----------|----------|-------|-------|
| <i>lpg1612</i> | transcriptional regulator SkgA (mercury resistance) (transcriptional ac     | Detoxification / adaptation, Transcripti              | 9.868  | 9.270  | 9.215  | 9.133  | 2.12E-03 | 8.48E-01 | -0.60 | -0.08 |
| <i>lpg1612</i> | transcriptional regulator SkgA (mercury resistance) (transcriptional ac     | Detoxification / adaptation, Transcripti              | 9.988  | 9.748  | 9.095  | 9.408  | 5.82E-01 | 5.57E-01 | -0.24 | 0.31  |
| <i>lpg1613</i> | acetyltransferase, GNAT family                                              | Named proteins of general function                    | 8.903  | 10.637 | 8.402  | 8.594  | 1.14E-05 | 7.99E-01 | 1.73  | 0.19  |
| <i>lpg1613</i> | acetyltransferase, GNAT family                                              | Named proteins of general function                    | 8.382  | 10.735 | 6.923  | 8.886  | 1.84E-04 | 2.03E-02 | 2.35  | 1.96  |
| <i>lpg1614</i> | glutamate rich protein GrpB                                                 | <i>yqkA</i><br>Named proteins of general function     | 8.856  | 10.557 | 9.388  | 8.415  | 1.21E-02 | 1.36E-01 | 1.70  | -0.97 |
| <i>lpg1614</i> | glutamate rich protein GrpB                                                 | <i>yqkA</i><br>Named proteins of general function     | 8.688  | 10.849 | 9.323  | 8.604  | 2.19E-04 | 2.12E-01 | 2.16  | -0.72 |
| <i>lpg1615</i> | multidrug resistance ABC transporter ATP binding protein <i>abcT3</i>       | Transport and binding                                 | 8.505  | 8.753  | 9.478  | 8.924  | 5.56E-01 | 1.92E-01 | 0.25  | -0.55 |
| <i>lpg1615</i> | multidrug resistance ABC transporter ATP binding protein <i>abcT3</i>       | Transport and binding                                 | 8.891  | 9.087  | 9.405  | 9.113  | 6.02E-01 | 5.22E-01 | 0.20  | -0.29 |
| <i>lpg1616</i> | ABC transporter ATP-binding protein Uup (erythromycin r <i>uup</i>          | Transport and binding                                 | 8.213  | 7.516  | 8.683  | 6.143  | 4.56E-01 | 3.68E-02 | -0.70 | -2.54 |
| <i>lpg1616</i> | ABC transporter ATP-binding protein Uup (erythromycin r <i>uup</i>          | Transport and binding                                 | 8.053  | 8.437  | 8.250  | 8.603  | 5.78E-01 | 8.55E-01 | 0.38  | 0.35  |
| <i>lpg1617</i> | probable signal peptide protein                                             | Unknown / hypothetical proteins                       | 9.980  | 8.926  | 11.110 | 9.015  | 5.45E-02 | 9.48E-03 | -1.05 | -2.09 |
| <i>lpg1617</i> | probable signal peptide protein                                             | Unknown / hypothetical proteins                       | 9.911  | 8.871  | 11.116 | 9.246  | 3.84E-03 | 6.08E-04 | -1.04 | -1.87 |
| <i>lpg1618</i> | beta-lactamase AmpS (OXA-18) (oxacillin hydrolase)                          | Detoxification / adaptation, Protein fate             | 9.810  | 10.178 | 10.311 | 10.410 | 4.84E-01 | 6.64E-01 | 0.37  | 0.10  |
| <i>lpg1618</i> | beta-lactamase AmpS (OXA-18) (oxacillin hydrolase)                          | Detoxification / adaptation, Protein fate             | 9.861  | 10.216 | 10.194 | 10.297 | 4.36E-01 | 6.87E-01 | 0.36  | 0.10  |
| <i>lpg1619</i> | cell division protein FtsI/penicillin binding protein 2 (stage <i>ftsI4</i> | Cell envelope synthesis, Chemotaxis /                 | 10.079 | 9.724  | 10.122 | 8.136  | 3.55E-01 | 1.70E-01 | -0.35 | -1.99 |
| <i>lpg1619</i> | cell division protein FtsI/penicillin binding protein 2 (stage <i>ftsI4</i> | Cell envelope synthesis, Chemotaxis /                 | 10.022 | 9.958  | 10.192 | 8.634  | 8.78E-01 | 2.55E-02 | -0.06 | -1.56 |
| <i>lpg1620</i> | small ORF (146aa) beta lactamase repressor (transcriptional repressi        | Transcription factors / DNA binding prc               | 8.458  | 9.326  | 8.087  | 8.166  | 1.75E-01 | 9.55E-01 | 0.87  | 0.08  |
| <i>lpg1620</i> | small ORF (146aa) beta lactamase repressor (transcriptional repressi        | Transcription factors / DNA binding prc               | 8.956  | 9.898  | 8.997  | 9.255  | 7.21E-02 | 6.07E-01 | 0.94  | 0.26  |
| <i>lpg1621</i> | ORF                                                                         | <i>ceg23</i><br>ORFs of unknown function (unique)     | 9.854  | 7.674  | 9.472  | 7.061  | 1.45E-01 | 2.85E-02 | -2.18 | -2.41 |
| <i>lpg1621</i> | ORF                                                                         | <i>ceg23</i><br>ORFs of unknown function (unique)     | 9.454  | 8.863  | 9.279  | 8.962  | 5.01E-01 | 6.30E-01 | -0.59 | -0.32 |
| <i>lpg1622</i> | ORF                                                                         | ORFs of unknown function (unique)                     | 8.909  | 9.220  | 10.914 | 8.614  | 3.95E-01 | 1.08E-01 | 0.31  | -2.30 |
| <i>lpg1622</i> | ORF                                                                         | ORFs of unknown function (unique)                     | 9.267  | 8.143  | 10.964 | 8.833  | 3.16E-02 | 6.38E-04 | -1.12 | -2.13 |
| <i>lpg1623</i> | hydrogenase                                                                 | Named proteins of general function                    | 10.457 | 11.800 | 9.351  | 12.540 | 1.71E-03 | 3.87E-05 | 1.34  | 3.19  |
| <i>lpg1623</i> | hydrogenase                                                                 | Named proteins of general function                    | 10.232 | 11.810 | 9.151  | 12.515 | 1.05E-03 | 8.80E-05 | 1.58  | 3.36  |
| <i>lpg1624</i> | alpha/beta hydrolase (hydrolase, alpha/beta fold family) (esterase/lip      | Protein fate / hydrolases / secretion                 | 10.552 | 10.301 | 10.237 | 10.390 | 4.07E-01 | 4.49E-01 | -0.25 | 0.15  |
| <i>lpg1624</i> | alpha/beta hydrolase (hydrolase, alpha/beta fold family) (esterase/lip      | Protein fate / hydrolases / secretion                 | 10.251 | 9.816  | 10.114 | 10.486 | 4.28E-01 | 2.06E-01 | -0.44 | 0.37  |
| <i>lpg1625</i> | small ORF (130aa)                                                           | ORFs of unknown function (unique)                     | 9.161  | 9.436  | 9.238  | 9.757  | 5.72E-01 | 1.87E-01 | 0.28  | 0.52  |
| <i>lpg1625</i> | small ORF (130aa)                                                           | ORFs of unknown function (unique)                     | 8.922  | 9.339  | 8.741  | 9.691  | 2.66E-01 | 5.77E-02 | 0.42  | 0.95  |
| <i>lpg1626</i> | copper efflux ATPase (cation (heavy metal) transport P-type ATPase)         | Transport and binding                                 | 10.957 | 10.309 | 11.898 | 10.179 | 6.16E-02 | 1.11E-03 | -0.65 | -1.72 |
| <i>lpg1626</i> | copper efflux ATPase (cation (heavy metal) transport P-type ATPase)         | Transport and binding                                 | 10.990 | 10.902 | 11.927 | 10.512 | 7.12E-01 | 5.56E-03 | -0.09 | -1.42 |
| <i>lpg1627</i> | putative secreted protein                                                   | Named proteins of general function                    | 8.895  | 9.775  | 9.639  | 10.540 | 9.42E-02 | 1.47E-01 | 0.88  | 0.90  |
| <i>lpg1627</i> | putative secreted protein                                                   | Named proteins of general function                    | 8.578  | 9.581  | 8.904  | 10.240 | 7.68E-02 | 7.12E-02 | 1.00  | 1.34  |
| <i>lpg1628</i> | coenzyme F390 synthetase FtsA (related to gramicidin S synthetase I         | Named proteins of general function                    | 8.094  | 8.255  | 8.413  | 7.376  | 8.77E-01 | 6.58E-02 | 0.16  | -1.04 |
| <i>lpg1628</i> | coenzyme F390 synthetase FtsA (related to gramicidin S synthetase I         | Named proteins of general function                    | 8.579  | 7.226  | 7.529  | 8.250  | 2.47E-01 | 3.83E-01 | -1.35 | 0.72  |
| <i>lpg1629</i> | Zn-dependent hydrolase Gump                                                 | Protein fate / hydrolases / secretion                 | 8.976  | 7.156  | 8.015  | 9.134  | 3.15E-02 | 2.08E-01 | -1.82 | 1.12  |
| <i>lpg1629</i> | Zn-dependent hydrolase Gump                                                 | Protein fate / hydrolases / secretion                 | 9.096  | 7.824  | 7.421  | 9.059  | 8.49E-02 | 2.58E-01 | -1.27 | 1.64  |
| <i>lpg1630</i> | 3-beta-hydroxysteroid dehydrogenase/isomerase (DTDP-4-dehydrodr             | Lipid Metabolism                                      | 9.742  | 10.788 | 9.735  | 9.662  | 1.04E-02 | 8.72E-01 | 1.05  | -0.07 |
| <i>lpg1630</i> | 3-beta-hydroxysteroid dehydrogenase/isomerase (DTDP-4-dehydrodr             | Lipid Metabolism                                      | 9.754  | 10.807 | 9.399  | 9.782  | 3.78E-03 | 6.14E-01 | 1.05  | 0.38  |
| <i>lpg1631</i> | chalcone and stilbene synthases (3-oxoacyl[ACP]synthase II)                 | Lipid Metabolism                                      | 9.703  | 11.121 | 10.802 | 11.051 | 1.51E-03 | 3.21E-01 | 1.42  | 0.25  |
| <i>lpg1631</i> | chalcone and stilbene synthases (3-oxoacyl[ACP]synthase II)                 | Lipid Metabolism                                      | 9.070  | 11.423 | 10.467 | 11.040 | 7.33E-05 | 1.23E-02 | 2.35  | 0.57  |
| <i>lpg1632</i> | glycosyltransferase (sulfolipid sulfoquinovosyl-diacylglycerol biosynthe    | Metabolism of Complex Lipids                          | 10.044 | 9.948  | 8.803  | 8.920  | 7.59E-01 | 9.26E-01 | -0.10 | 0.12  |
| <i>lpg1632</i> | glycosyltransferase (sulfolipid sulfoquinovosyl-diacylglycerol biosynthe    | Metabolism of Complex Lipids                          | 10.058 | 10.151 | 8.796  | 9.830  | 6.99E-01 | 4.76E-02 | 0.09  | 1.03  |
| <i>lpg1633</i> | ORF                                                                         | ORFs of unknown function (unique)                     | 8.306  | 9.133  | 7.792  | 8.450  | 9.24E-02 | 2.08E-01 | 0.83  | 0.66  |
| <i>lpg1633</i> | ORF                                                                         | ORFs of unknown function (unique)                     | 8.530  | 9.681  | 6.550  | 8.951  | 2.07E-01 | 2.06E-02 | 1.15  | 2.40  |
| <i>lpg1634</i> | oxidase (FAD binding oxidoreductase)                                        | Named proteins of general function                    | 8.997  | 9.471  | 10.027 | 8.040  | 2.85E-01 | 3.30E-03 | 0.47  | -1.99 |
| <i>lpg1634</i> | oxidase (FAD binding oxidoreductase)                                        | Named proteins of general function                    | 9.224  | 9.112  | 9.921  | 8.251  | 8.30E-01 | 2.55E-02 | -0.11 | -1.67 |
| <i>lpg1635</i> | diene lactone hydrolase                                                     | Biodegradation of Xenobiotics                         | 9.798  | 8.157  | 12.206 | 7.726  | 6.77E-02 | 3.60E-04 | -1.64 | -4.48 |
| <i>lpg1635</i> | diene lactone hydrolase                                                     | Biodegradation of Xenobiotics                         | 9.863  | 8.472  | 12.289 | 8.205  | 6.86E-02 | 2.36E-03 | -1.39 | -4.08 |
| <i>lpg1636</i> | acetyltransferase, GNAT family (GCN5-related N-acetyltransferase) (r        | Named proteins of general function                    | 8.954  | 8.447  | 11.698 | 8.192  | 6.07E-01 | 3.75E-03 | -0.51 | -3.51 |
| <i>lpg1636</i> | acetyltransferase, GNAT family (GCN5-related N-acetyltransferase) (r        | Named proteins of general function                    | 7.543  | 9.251  | 11.602 | 9.447  | 2.64E-01 | 3.89E-02 | 1.71  | -2.15 |
| <i>lpg1637</i> | polysaccharide deacetylase (chitooligosaccharide deacetylase)               | Metabolism of Complex Carbohydrate:                   | 10.807 | 11.795 | 12.911 | 10.811 | 4.23E-02 | 2.46E-03 | 0.99  | -2.10 |
| <i>lpg1637</i> | polysaccharide deacetylase (chitooligosaccharide deacetylase)               | Metabolism of Complex Carbohydrate:                   | 10.961 | 11.606 | 12.967 | 10.902 | 1.68E-01 | 2.75E-03 | 0.64  | -2.07 |
| <i>lpg1638</i> | drug:proton antiporter (integral membrane transport protein) (permea        | Transport and binding                                 | 11.475 | 9.887  | 10.269 | 10.022 | 4.25E-03 | 6.76E-01 | -1.59 | -0.25 |
| <i>lpg1638</i> | drug:proton antiporter (integral membrane transport protein) (permea        | Transport and binding                                 | 11.314 | 10.325 | 9.523  | 10.472 | 6.69E-02 | 1.33E-01 | -0.99 | 0.95  |
| <i>lpg1639</i> | ORF                                                                         | ORFs of unknown function (unique)                     | 9.768  | 8.645  | 12.445 | 7.732  | 2.24E-01 | 7.85E-04 | -1.12 | -4.71 |
| <i>lpg1639</i> | ORF                                                                         | ORFs of unknown function (unique)                     | 9.792  | 8.294  | 12.448 | 8.364  | 1.56E-01 | 2.64E-03 | -1.50 | -4.08 |
| <i>lpg1640</i> | transmembrane protein                                                       | Unknown / hypothetical proteins                       | 10.278 | 9.050  | 9.439  | 8.855  | 1.33E-02 | 4.06E-01 | -1.23 | -0.58 |
| <i>lpg1640</i> | transmembrane protein                                                       | Unknown / hypothetical proteins                       | 10.520 | 10.040 | 9.357  | 10.280 | 3.68E-01 | 6.11E-02 | -0.48 | 0.92  |
| <i>lpg1641</i> | acylaminoacyl peptidase (peptidase S9, prolyl oligopeptidase family)        | Protein fate / hydrolases / secretion                 | 10.457 | 9.362  | 11.998 | 9.791  | 1.64E-01 | 7.58E-03 | -1.09 | -2.21 |
| <i>lpg1641</i> | acylaminoacyl peptidase (peptidase S9, prolyl oligopeptidase family)        | Protein fate / hydrolases / secretion                 | 10.517 | 9.572  | 12.062 | 10.185 | 1.63E-01 | 7.39E-03 | -0.95 | -1.88 |
| <i>lpg1642</i> | SidB, RTX (repeat in toxin) cytotoxin                                       | <i>sidB</i><br>Toxin production / other pathogen func | 9.237  | 8.647  | 7.807  | 7.439  | 2.93E-01 | 6.24E-01 | -0.59 | -0.37 |
| <i>lpg1642</i> | SidB, RTX (repeat in toxin) cytotoxin                                       | <i>sidB</i><br>Toxin production / other pathogen func | 9.486  | 8.417  | 7.645  | 7.525  | 8.51E-03 | 8.61E-01 | -1.07 | -0.12 |
| <i>lpg1643</i> | threonine synthase                                                          | <i>thrC</i><br>Amino Acid Metabolism, Metabolism o    | 8.688  | 9.186  | 10.422 | 8.379  | 1.98E-01 | 1.71E-02 | 0.50  | -2.04 |
| <i>lpg1643</i> | threonine synthase                                                          | <i>thrC</i><br>Amino Acid Metabolism, Metabolism o    | 8.955  | 10.014 | 10.568 | 9.172  | 9.70E-02 | 1.69E-03 | 1.06  | -1.40 |

|                |                                                                       |                                                 |        |        |        |        |          |          |       |       |
|----------------|-----------------------------------------------------------------------|-------------------------------------------------|--------|--------|--------|--------|----------|----------|-------|-------|
| <i>lpg1644</i> | ORF                                                                   | ORFs of unknown function (unique)               | 9.845  | 8.824  | 9.705  | 7.237  | 2.31E-03 | 1.27E-03 | -1.02 | -2.47 |
| <i>lpg1644</i> | ORF                                                                   | ORFs of unknown function (unique)               | 9.744  | 9.462  | 9.632  | 8.526  | 4.67E-01 | 2.96E-02 | -0.28 | -1.11 |
| <i>lpg1645</i> | hypothetical (periplasmic protein?)                                   | Named proteins of general function              | 8.190  | 8.685  | 9.476  | 7.636  | 3.43E-01 | 1.41E-02 | 0.49  | -1.84 |
| <i>lpg1645</i> | hypothetical (periplasmic protein?)                                   | Named proteins of general function              | 8.088  | 8.851  | 9.430  | 8.071  | 3.09E-02 | 1.81E-03 | 0.76  | -1.36 |
| <i>lpg1646</i> | cytochrome b561 transmembrane protein (secretory vesicle-specific     | € Toxin production / other pathogen func        | 11.773 | 11.080 | 12.803 | 10.220 | 2.06E-01 | 1.41E-04 | -0.69 | -2.58 |
| <i>lpg1646</i> | cytochrome b561 transmembrane protein (secretory vesicle-specific     | € Toxin production / other pathogen func        | 11.770 | 10.463 | 12.781 | 10.432 | 9.36E-02 | 1.43E-04 | -1.31 | -2.35 |
| <i>lpg1647</i> | hypothetical (exported protein)                                       | Unknown / hypothetical proteins                 | 12.006 | 10.368 | 12.600 | 9.215  | 1.02E-01 | 6.04E-06 | -1.64 | -3.39 |
| <i>lpg1647</i> | hypothetical (exported protein)                                       | Unknown / hypothetical proteins                 | 11.086 | 10.343 | 12.486 | 9.128  | 2.08E-01 | 5.56E-06 | -0.74 | -3.36 |
| <i>lpg1648</i> | signal peptide protein (integral membrane or exported protein?)       | Named proteins of general function              | 11.231 | 10.110 | 12.331 | 8.097  | 1.35E-04 | 2.22E-04 | -1.12 | -4.23 |
| <i>lpg1648</i> | signal peptide protein (integral membrane or exported protein?)       | Named proteins of general function              | 11.236 | 9.810  | 12.357 | 8.508  | 3.20E-04 | 7.13E-05 | -1.43 | -3.85 |
| <i>lpg1649</i> | myo-inositol catabolism protein lolE                                  | <i>lolE</i> Carbohydrate Metabolism             | 8.568  | 8.667  | 7.766  | 7.924  | 8.75E-01 | 8.43E-01 | 0.10  | 0.16  |
| <i>lpg1649</i> | myo-inositol catabolism protein lolE                                  | <i>lolE</i> Carbohydrate Metabolism             | 8.572  | 9.571  | 8.148  | 8.902  | 4.52E-01 | 5.95E-01 | 1.00  | 0.75  |
| <i>lpg1650</i> | myo-inositol catabolism protein lolD (malonic semialdehy              | <i>lolD</i> Carbohydrate Metabolism             | 10.841 | 9.795  | 9.781  | 9.412  | 2.50E-02 | 4.63E-01 | -1.05 | -0.37 |
| <i>lpg1650</i> | myo-inositol catabolism protein lolD (malonic semialdehy              | <i>lolD</i> Carbohydrate Metabolism             | 10.983 | 10.127 | 9.733  | 10.168 | 1.64E-01 | 4.75E-01 | -0.86 | 0.44  |
| <i>lpg1651</i> | lolC/lolB transferase kinase protein (5-dehydro-2-deoxyglucokinase)   | Carbohydrate Metabolism                         | 10.682 | 9.022  | 8.749  | 8.209  | 4.44E-04 | 4.73E-01 | -1.66 | -0.54 |
| <i>lpg1651</i> | lolC/lolB transferase kinase protein (5-dehydro-2-deoxyglucokinase)   | Carbohydrate Metabolism                         | 10.504 | 9.382  | 8.932  | 9.129  | 6.86E-02 | 7.98E-01 | -1.12 | 0.20  |
| <i>lpg1652</i> | myo-inositol-2-dehydrogenase (oxidoreductase, NAD binding)            | Carbohydrate Metabolism, Metabolism             | 11.064 | 10.115 | 9.575  | 9.219  | 2.01E-01 | 6.97E-01 | -0.95 | -0.36 |
| <i>lpg1652</i> | myo-inositol-2-dehydrogenase (oxidoreductase, NAD binding)            | Carbohydrate Metabolism, Metabolism             | 10.940 | 10.189 | 9.312  | 10.345 | 2.25E-01 | 1.28E-01 | -0.75 | 1.03  |
| <i>lpg1653</i> | D-xylose-proton symporter (galactose-proton symport) (sugar transp    | Transport and binding                           | 11.344 | 9.595  | 9.482  | 9.248  | 1.98E-04 | 6.64E-01 | -1.75 | -0.23 |
| <i>lpg1653</i> | D-xylose-proton symporter (galactose-proton symport) (sugar transp    | Transport and binding                           | 10.853 | 9.245  | 8.601  | 9.342  | 1.07E-03 | 2.83E-01 | -1.61 | 0.74  |
| <i>lpg1654</i> | ORF                                                                   | ORFs of unknown function (unique)               | 10.444 | 11.164 | 10.061 | 8.956  | 1.30E-01 | 2.76E-02 | 0.72  | -1.11 |
| <i>lpg1654</i> | ORF                                                                   | ORFs of unknown function (unique)               | 9.732  | 11.012 | 9.379  | 8.913  | 6.65E-02 | 2.85E-01 | 1.28  | -0.47 |
| <i>lpg1655</i> | class 4 metalloprotease (zinc metalloprotease) (virulence <i>lasB</i> | Toxin production / other pathogen func          | 10.890 | 9.443  | 10.836 | 8.735  | 1.10E-03 | 8.64E-04 | -1.45 | -2.10 |
| <i>lpg1655</i> | class 4 metalloprotease (zinc metalloprotease) (virulence <i>lasB</i> | Toxin production / other pathogen func          | 10.713 | 8.919  | 11.007 | 9.233  | 2.76E-03 | 1.24E-02 | -1.79 | -1.77 |
| <i>lpg1656</i> | hypothetical                                                          | Unknown / hypothetical proteins                 | 9.999  | 10.367 | 9.575  | 10.478 | 1.63E-01 | 5.34E-02 | 0.37  | 0.90  |
| <i>lpg1656</i> | hypothetical                                                          | Unknown / hypothetical proteins                 | 9.969  | 10.305 | 9.390  | 10.468 | 2.95E-01 | 3.38E-02 | 0.34  | 1.08  |
| <i>lpg1657</i> | NG,NG-dimethylarginine dimethylaminohydrolase                         | Named proteins of general function              | 9.974  | 9.199  | 8.382  | 8.802  | 2.35E-02 | 5.58E-01 | -0.77 | 0.42  |
| <i>lpg1657</i> | NG,NG-dimethylarginine dimethylaminohydrolase                         | Named proteins of general function              | 9.765  | 9.087  | 8.133  | 9.213  | 1.53E-01 | 1.99E-01 | -0.68 | 1.08  |
| <i>lpg1658</i> | amino acid antiporter (glutamate/gamma-aminobutyrate antiporter)      | Transport and binding                           | 11.005 | 10.339 | 10.276 | 10.463 | 1.62E-01 | 7.17E-01 | -0.67 | 0.19  |
| <i>lpg1658</i> | amino acid antiporter (glutamate/gamma-aminobutyrate antiporter)      | Transport and binding                           | 11.073 | 10.210 | 10.252 | 10.460 | 7.16E-02 | 6.46E-01 | -0.86 | 0.21  |
| <i>lpg1659</i> | membrane protein                                                      | Named proteins of general function              | 10.919 | 9.717  | 12.213 | 9.179  | 3.78E-02 | 3.89E-03 | -1.20 | -3.03 |
| <i>lpg1659</i> | membrane protein                                                      | Named proteins of general function              | 10.821 | 9.870  | 12.220 | 9.358  | 7.16E-02 | 3.70E-03 | -0.95 | -2.86 |
| <i>lpg1660</i> | ORF                                                                   | <i>LegL3</i> ORFs of unknown function (unique)  | 8.418  | 7.577  | 10.002 | 7.662  | 4.07E-01 | 1.11E-01 | -0.84 | -2.34 |
| <i>lpg1660</i> | ORF                                                                   | <i>LegL3</i> ORFs of unknown function (unique)  | 8.420  | 7.997  | 9.673  | 7.500  | 6.72E-01 | 1.97E-01 | -0.42 | -2.17 |
| <i>lpg1661</i> | hypothetical (expressed protein?)                                     | Unknown / hypothetical proteins                 | 10.077 | 9.223  | 9.202  | 8.916  | 2.40E-02 | 4.94E-01 | -0.85 | -0.29 |
| <i>lpg1661</i> | hypothetical (expressed protein?)                                     | Unknown / hypothetical proteins                 | 10.061 | 9.213  | 9.314  | 9.825  | 5.15E-03 | 3.46E-02 | -0.85 | 0.51  |
| <i>lpg1662</i> | putative transport protein                                            | Transport and binding                           | 11.111 | 10.162 | 10.511 | 10.329 | 9.29E-02 | 4.77E-01 | -0.95 | -0.18 |
| <i>lpg1662</i> | putative transport protein                                            | Transport and binding                           | 11.039 | 10.187 | 9.829  | 10.233 | 9.02E-02 | 6.46E-01 | -0.85 | 0.40  |
| <i>lpg1663</i> | ORF                                                                   | ORFs of unknown function (unique)               | 10.860 | 12.057 | 9.965  | 11.990 | 6.05E-02 | 9.16E-03 | 1.20  | 2.02  |
| <i>lpg1663</i> | ORF                                                                   | ORFs of unknown function (unique)               | 11.177 | 12.008 | 9.547  | 12.021 | 1.64E-02 | 2.56E-02 | 0.83  | 2.47  |
| <i>lpg1664</i> | penicillin binding protein 1C, peptidoglycan biosynthesis             | Cell envelope synthesis, Metabolism o           | 9.943  | 10.680 | 8.350  | 10.781 | 8.05E-02 | 5.27E-03 | 0.74  | 2.43  |
| <i>lpg1664</i> | penicillin binding protein 1C, peptidoglycan biosynthesis             | Cell envelope synthesis, Metabolism o           | 9.182  | 10.744 | 8.213  | 10.719 | 4.99E-02 | 4.64E-04 | 1.56  | 2.51  |
| <i>lpg1665</i> | hypothetical (lipoprotein)                                            | Named proteins of general function              | 10.551 | 9.945  | 10.626 | 9.852  | 2.30E-02 | 1.73E-02 | -0.61 | -0.77 |
| <i>lpg1665</i> | hypothetical (lipoprotein)                                            | Named proteins of general function              | 10.387 | 9.667  | 10.608 | 9.864  | 1.16E-02 | 1.19E-02 | -0.72 | -0.74 |
| <i>lpg1666</i> | ORF                                                                   | ORFs of unknown function (unique)               | 9.619  | 8.692  | 8.786  | 9.421  | 1.42E-02 | 2.16E-01 | -0.93 | 0.63  |
| <i>lpg1666</i> | ORF                                                                   | ORFs of unknown function (unique)               | 9.584  | 9.006  | 9.015  | 10.078 | 5.39E-02 | 2.16E-02 | -0.58 | 1.06  |
| <i>lpg1667</i> | conserved hypothetical protein                                        | Unknown / hypothetical proteins                 | 10.106 | 9.051  | 11.678 | 8.757  | 1.17E-02 | 2.36E-04 | -1.06 | -2.92 |
| <i>lpg1667</i> | conserved hypothetical protein                                        | Unknown / hypothetical proteins                 | 10.106 | 9.099  | 11.727 | 8.944  | 2.92E-02 | 1.53E-04 | -1.01 | -2.78 |
| <i>lpg1668</i> | ORF                                                                   | ORFs of unknown function (unique)               | 10.225 | 9.857  | 10.991 | 10.165 | 5.61E-02 | 2.44E-02 | -0.37 | -0.83 |
| <i>lpg1668</i> | ORF                                                                   | ORFs of unknown function (unique)               | 10.340 | 10.479 | 10.828 | 10.673 | 8.13E-01 | 8.23E-01 | 0.14  | -0.16 |
| <i>lpg1669</i> | alpha-amylase, putative                                               | Metabolism of Complex Carbohydrate:             | 9.039  | 10.308 | 13.764 | 8.463  | 2.70E-01 | 4.01E-04 | 1.27  | -5.30 |
| <i>lpg1669</i> | alpha-amylase, putative                                               | Metabolism of Complex Carbohydrate:             | 9.249  | 10.473 | 13.789 | 8.673  | 2.89E-01 | 2.53E-03 | 1.22  | -5.12 |
| <i>lpg1670</i> | ORF                                                                   | ORFs of unknown function (unique)               | 10.641 | 12.164 | 12.571 | 9.357  | 1.04E-02 | 9.84E-05 | 1.52  | -3.21 |
| <i>lpg1670</i> | ORF                                                                   | ORFs of unknown function (unique)               | 10.332 | 12.226 | 12.642 | 9.522  | 1.11E-03 | 1.16E-04 | 1.89  | -3.12 |
| <i>lpg1671</i> | alpha-amylase, putative                                               | Metabolism of Complex Carbohydrate:             | 10.531 | 10.843 | 11.377 | 10.231 | 5.08E-01 | 3.41E-03 | 0.31  | -1.15 |
| <i>lpg1671</i> | alpha-amylase, putative                                               | Metabolism of Complex Carbohydrate:             | 10.435 | 10.645 | 11.163 | 10.406 | 6.19E-01 | 4.60E-02 | 0.21  | -0.76 |
| <i>lpg1672</i> | phosphoribosylglycinamide formyltransferase (phosphoribosylamine-γ    | Nucleotide Metabolism, Metabolism of            | 11.303 | 9.486  | 11.928 | 10.176 | 1.11E-04 | 6.55E-05 | -1.82 | -1.75 |
| <i>lpg1672</i> | phosphoribosylglycinamide formyltransferase (phosphoribosylamine-γ    | Nucleotide Metabolism, Metabolism of            | 11.309 | 9.172  | 12.033 | 10.283 | 1.39E-03 | 3.60E-04 | -2.14 | -1.75 |
| <i>lpg1673</i> | phosphoribosylamine-glycine ligase (GARS) (glycinamide ribonucleot    | Nucleotide Metabolism                           | 10.091 | 8.979  | 10.976 | 8.673  | 2.37E-02 | 1.36E-04 | -1.11 | -2.30 |
| <i>lpg1673</i> | phosphoribosylamine-glycine ligase (GARS) (glycinamide ribonucleot    | Nucleotide Metabolism                           | 10.237 | 9.088  | 9.117  | 11.026 | 7.48E-04 | 3.20E-06 | -1.15 | -1.91 |
| <i>lpg1674</i> | amidophosphoribosyltransferase (glutamine phosphoribo                 | <i>purF</i> Nucleotide Metabolism, Amino Acid M | 11.622 | 9.761  | 12.244 | 11.021 | 5.55E-05 | 2.37E-05 | -1.86 | -1.22 |
| <i>lpg1674</i> | amidophosphoribosyltransferase (glutamine phosphoribo                 | <i>purF</i> Nucleotide Metabolism, Amino Acid M | 11.724 | 10.142 | 12.211 | 11.027 | 8.61E-05 | 4.97E-04 | -1.58 | -1.19 |
| <i>lpg1675</i> | phosphoribosylimidazole-succinocarboxamide synthase (SAICAR syr       | Nucleotide Metabolism                           | 12.691 | 10.656 | 12.462 | 11.284 | 3.63E-05 | 2.74E-03 | -2.04 | -1.18 |
| <i>lpg1675</i> | phosphoribosylimidazole-succinocarboxamide synthase (SAICAR syr       | Nucleotide Metabolism                           | 12.675 | 10.805 | 12.437 | 11.653 | 7.16E-05 | 6.18E-05 | -1.87 | -0.78 |

|                |                                                                        |              |                                            |        |        |        |          |          |          |       |       |
|----------------|------------------------------------------------------------------------|--------------|--------------------------------------------|--------|--------|--------|----------|----------|----------|-------|-------|
| <i>lpg1676</i> | phosphoribosylformylglycinamide synthase I (FGAM sy <i>purQ</i> )      |              | Nucleotide Metabolism                      | 11.825 | 10.460 | 11.210 | 11.209   | 3.89E-02 | 9.98E-01 | -1.36 | 0.00  |
| <i>lpg1676</i> | phosphoribosylformylglycinamide synthase I (FGAM sy <i>purQ</i> )      |              | Nucleotide Metabolism                      | 12.128 | 10.641 | 11.438 | 11.712   | 6.04E-02 | 5.86E-01 | -1.49 | 0.27  |
| <i>lpg1677</i> | phosphoribosylformylglycinamide cyclo ligase (phosph <i>purM</i> )     |              | Nucleotide Metabolism                      | 12.328 | 11.214 | 11.825 | 11.239   | 3.73E-04 | 1.84E-02 | -1.11 | -0.59 |
| <i>lpg1677</i> | phosphoribosylformylglycinamide cyclo ligase (phosph <i>purM</i> )     |              | Nucleotide Metabolism                      | 12.179 | 11.338 | 11.595 | 11.401   | 1.04E-02 | 4.95E-01 | -0.84 | -0.19 |
| <i>lpg1678</i> | phosphoribosylformylglycinamide synthase II (FGAM sy <i>purL2</i> )    |              | Nucleotide Metabolism                      | 10.979 | 10.232 | 12.074 | 11.202   | 5.17E-01 | 8.82E-02 | -0.75 | -0.87 |
| <i>lpg1678</i> | phosphoribosylformylglycinamide synthase II (FGAM sy <i>purL2</i> )    |              | Nucleotide Metabolism                      | 11.117 | 11.378 | 12.053 | 11.638   | 4.34E-01 | 3.24E-01 | 0.26  | -0.41 |
| <i>lpg1679</i> | hypothetical                                                           |              | Unknown / hypothetical proteins            | 9.037  | 9.753  | 9.447  | 10.454   | 4.85E-02 | 6.62E-02 | 0.72  | 1.01  |
| <i>lpg1679</i> | hypothetical                                                           |              | Unknown / hypothetical proteins            | 8.894  | 9.842  | 9.522  | 10.640   | 3.36E-02 | 5.30E-02 | 0.95  | 1.12  |
| <i>lpg1680</i> | thiol:disulfide interchange protein DsbD                               | <i>dsbD</i>  | Named proteins of general function         | 10.252 | 11.224 | 11.906 | 9.429    | 4.50E-02 | 6.92E-04 | 0.97  | -2.48 |
| <i>lpg1680</i> | thiol:disulfide interchange protein DsbD                               | <i>dsbD</i>  | Named proteins of general function         | 10.234 | 11.122 | 11.898 | 9.498    | 8.83E-02 | 7.39E-04 | 0.89  | -2.40 |
| <i>lpg1681</i> | small ORF (105aa)                                                      |              | ORFs of unknown function (unique)          | 11.449 | 10.857 | 8.957  | 9.451    | 3.78E-01 | 6.01E-01 | -0.59 | 0.49  |
| <i>lpg1681</i> | small ORF (105aa)                                                      |              | ORFs of unknown function (unique)          | 11.119 | 10.990 | 8.883  | 9.981    | 8.86E-01 | 2.22E-01 | -0.13 | 1.10  |
| <i>lpg1682</i> | oxidoreductase, short chain dehydrogenase/reductase family             |              | Named proteins of general function         | 9.769  | 9.867  | 8.560  | 8.685    | 7.71E-01 | 8.76E-01 | 0.10  | 0.13  |
| <i>lpg1682</i> | oxidoreductase, short chain dehydrogenase/reductase family             |              | Named proteins of general function         | 9.815  | 9.726  | 9.297  | 9.622    | 7.72E-01 | 6.39E-01 | -0.09 | 0.33  |
| <i>lpg1683</i> | ORF                                                                    |              | ORFs of unknown function (unique)          | 9.134  | 8.959  | 9.891  | 7.28E-01 | 1.05E-02 | 1.05E-02 | -0.17 | -2.16 |
| <i>lpg1683</i> | ORF                                                                    |              | ORFs of unknown function (unique)          | 9.571  | 9.612  | 12.130 | 10.579   | 9.34E-01 | 1.68E-02 | 0.04  | -1.55 |
| <i>lpg1684</i> | ORF                                                                    |              | ORFs of unknown function (unique)          | 7.859  | 11.767 | 10.038 | 9.084    | 2.01E-02 | 2.65E-01 | 3.91  | -0.95 |
| <i>lpg1684</i> | ORF                                                                    |              | ORFs of unknown function (unique)          | 9.122  | 11.724 | 10.246 | 9.542    | 3.50E-03 | 2.80E-01 | 2.60  | -0.70 |
| <i>lpg1685</i> | ORF                                                                    |              | ORFs of unknown function (unique)          | 11.109 | 12.072 | 12.151 | 10.493   | 3.49E-02 | 6.38E-04 | 0.96  | -1.66 |
| <i>lpg1685</i> | ORF                                                                    |              | ORFs of unknown function (unique)          | 11.075 | 12.446 | 12.084 | 10.637   | 1.98E-03 | 5.75E-04 | 1.37  | -1.45 |
| <i>lpg1686</i> | small ORF (105aa)                                                      |              | ORFs of unknown function (unique)          | 9.921  | 10.105 | 12.559 | 10.410   | 8.71E-01 | 5.33E-02 | 0.18  | -2.15 |
| <i>lpg1686</i> | small ORF (105aa)                                                      |              | ORFs of unknown function (unique)          | 9.691  | 10.195 | 12.383 | 10.589   | 6.81E-01 | 2.02E-01 | 0.50  | -1.79 |
| <i>lpg1687</i> | ORF                                                                    |              | ORFs of unknown function (unique)          | 7.923  | 8.915  | 10.019 | 9.287    | 2.30E-01 | 1.70E-01 | 0.99  | -0.73 |
| <i>lpg1687</i> | ORF                                                                    |              | ORFs of unknown function (unique)          | 7.704  | 7.136  | 9.680  | 9.041    | 7.18E-01 | 3.67E-01 | -0.57 | -0.64 |
| <i>lpg1688</i> | possible flagellar hook-length control protein                         |              | Chemotaxis / motility / cell division, Sig | 7.471  | 8.677  | 10.026 | 8.077    | 9.87E-02 | 1.03E-02 | 1.21  | -1.95 |
| <i>lpg1688</i> | possible flagellar hook-length control protein                         |              | Chemotaxis / motility / cell division, Sig | 7.692  | 7.628  | 9.811  | 8.668    | 9.53E-01 | 2.29E-01 | -0.06 | -1.14 |
| <i>lpg1689</i> | 23.7 kDa protein                                                       |              | Named proteins of general function         | 8.897  | 8.354  | 9.393  | 7.988    | 2.88E-01 | 4.23E-02 | -0.54 | -1.40 |
| <i>lpg1689</i> | 23.7 kDa protein                                                       |              | Named proteins of general function         | 8.736  | 8.974  | 9.396  | 8.611    | 6.23E-01 | 2.83E-01 | 0.24  | -0.79 |
| <i>lpg1690</i> | aconitate hydratase (citrate hydro-lyase) (aconitase)                  | <i>acnA</i>  | Carbohydrate Metabolism, Energy Me         | 13.430 | 14.237 | 14.875 | 14.710   | 3.74E-02 | 6.33E-01 | 0.81  | -0.17 |
| <i>lpg1690</i> | aconitate hydratase (citrate hydro-lyase) (aconitase)                  | <i>acnA</i>  | Carbohydrate Metabolism, Energy Me         | 13.475 | 14.250 | 14.904 | 14.742   | 6.39E-02 | 6.14E-01 | 0.77  | -0.16 |
| <i>lpg1691</i> | amino acid antiporter (glutamate/gamma-aminobutyrate antiporter)       |              | Transport and binding                      | 9.840  | 9.930  | 9.531  | 9.434    | 8.25E-01 | 8.36E-01 | 0.09  | -0.10 |
| <i>lpg1691</i> | amino acid antiporter (glutamate/gamma-aminobutyrate antiporter)       |              | Transport and binding                      | 9.745  | 10.330 | 9.699  | 10.131   | 1.65E-01 | 4.39E-01 | 0.58  | 0.43  |
| <i>lpg1692</i> | ORF                                                                    |              | ORFs of unknown function (unique)          | 11.270 | 11.547 | 9.965  | 11.095   | 3.24E-01 | 4.85E-02 | 0.28  | 1.13  |
| <i>lpg1692</i> | ORF                                                                    |              | ORFs of unknown function (unique)          | 11.225 | 11.639 | 9.916  | 11.286   | 9.31E-02 | 2.03E-02 | 0.41  | 1.37  |
| <i>lpg1693</i> | small ORF (92aa)                                                       |              | ORFs of unknown function (unique)          | 8.334  | 8.241  | 9.657  | 8.589    | 8.56E-01 | 4.74E-02 | -0.09 | -1.07 |
| <i>lpg1693</i> | small ORF (92aa)                                                       |              | ORFs of unknown function (unique)          | 8.423  | 8.748  | 9.433  | 8.693    | 6.24E-01 | 2.47E-01 | 0.32  | -0.74 |
| <i>lpg1694</i> | transposase IS630 family (transposase ISA1083)                         |              | Viral functions / Phage / Transposases     | 8.530  | 10.251 | 9.939  | 9.635    | 1.10E-02 | 4.74E-01 | 1.72  | -0.30 |
| <i>lpg1694</i> | transposase IS630 family (transposase ISA1083)                         |              | Viral functions / Phage / Transposases     | 9.992  | 10.000 | 10.168 | 10.257   | 9.87E-01 | 8.68E-01 | 0.01  | 0.09  |
| <i>lpg1694</i> | transposase IS630 family (transposase ISA1083)                         |              | Viral functions / Phage / Transposases     | 8.522  | 10.617 | 9.721  | 9.855    | 1.36E-02 | 6.95E-01 | 2.09  | 0.13  |
| <i>lpg1694</i> | transposase IS630 family (transposase ISA1083)                         |              | Viral functions / Phage / Transposases     | 9.857  | 10.273 | 10.680 | 10.820   | 3.45E-01 | 5.72E-01 | 0.42  | 0.14  |
| <i>lpg1695</i> | transposase IS630 family                                               |              | Viral functions / Phage / Transposases     | 11.123 | 11.040 | 9.564  | 11.074   | 7.52E-01 | 4.95E-02 | -0.08 | 1.51  |
| <i>lpg1695</i> | transposase IS630 family                                               |              | Viral functions / Phage / Transposases     | 10.717 | 11.918 | 9.511  | 12.081   | 1.03E-02 | 3.09E-03 | 1.20  | 2.57  |
| <i>lpg1696</i> | proline dehydrogenase/delta-1-pyrroline-5-carboxylate de <i>putA</i>   |              | Amino Acid Metabolism                      | 11.182 | 12.144 | 11.528 | 11.758   | 2.56E-03 | 4.61E-01 | 0.96  | 0.23  |
| <i>lpg1696</i> | proline dehydrogenase/delta-1-pyrroline-5-carboxylate de <i>putA</i>   |              | Amino Acid Metabolism                      | 10.999 | 12.316 | 11.451 | 11.861   | 5.50E-05 | 2.19E-01 | 1.32  | 0.41  |
| <i>lpg1697</i> | conserved hypothetical protein                                         |              | Unknown / hypothetical proteins            | 10.571 | 11.790 | 9.973  | 10.191   | 2.53E-03 | 5.03E-01 | 1.22  | 0.22  |
| <i>lpg1697</i> | conserved hypothetical protein                                         |              | Unknown / hypothetical proteins            | 10.555 | 11.808 | 9.835  | 10.283   | 4.42E-04 | 3.69E-01 | 1.25  | 0.45  |
| <i>lpg1698</i> | (ProQ, activator of ProP osmoprotectant transporter?)                  |              | Detoxification / adaptation, Transcripti   | 11.384 | 12.718 | 9.938  | 12.122   | 2.12E-02 | 1.02E-04 | 1.33  | 2.18  |
| <i>lpg1698</i> | (ProQ, activator of ProP osmoprotectant transporter?)                  |              | Detoxification / adaptation, Transcripti   | 11.254 | 12.707 | 9.757  | 12.081   | 4.02E-02 | 2.05E-03 | 1.45  | 2.32  |
| <i>lpg1699</i> | 3-demethylubiquinone-9 3-methyltransferase UbiG                        | <i>ubiG</i>  | Metabolism of Cofactors and Vitamins       | 12.226 | 12.928 | 10.822 | 13.211   | 6.91E-03 | 3.12E-04 | 0.70  | 2.39  |
| <i>lpg1699</i> | 3-demethylubiquinone-9 3-methyltransferase UbiG                        | <i>ubiG</i>  | Metabolism of Cofactors and Vitamins       | 12.119 | 12.933 | 10.804 | 13.230   | 1.09E-02 | 2.24E-04 | 0.81  | 2.43  |
| <i>lpg1700</i> | uracil DNA glycosylase                                                 |              | Nucleotide Metabolism                      | 10.733 | 10.866 | 10.750 | 10.777   | 5.28E-01 | 9.45E-01 | 0.13  | 0.03  |
| <i>lpg1700</i> | uracil DNA glycosylase                                                 |              | Nucleotide Metabolism                      | 10.598 | 10.845 | 9.537  | 10.792   | 3.53E-01 | 5.93E-02 | 0.25  | 1.26  |
| <i>lpg1701</i> | kinectin 1 (kinesin receptor)                                          | <i>LegC3</i> | Named proteins of general function         | 10.880 | 10.757 | 10.519 | 9.771    | 8.53E-01 | 3.50E-02 | -0.12 | -0.75 |
| <i>lpg1701</i> | kinectin 1 (kinesin receptor)                                          | <i>LegC3</i> | Named proteins of general function         | 10.477 | 11.164 | 9.132  | 9.789    | 7.27E-02 | 3.44E-01 | 0.69  | 0.66  |
| <i>lpg1702</i> | Tpr                                                                    |              | Named proteins of general function         | 12.975 | 15.026 | 14.356 | 12.049   | 1.53E-03 | 9.87E-06 | 2.05  | -2.31 |
| <i>lpg1702</i> | Tpr                                                                    |              | Named proteins of general function         | 12.974 | 15.019 | 14.334 | 12.066   | 1.72E-03 | 1.64E-05 | 2.04  | -2.27 |
| <i>lpg1703</i> | SOS mutagenesis and repair UmuC protein                                |              | Replication and Repair                     | 9.504  | 10.377 | 8.899  | 9.635    | 1.30E-02 | 2.75E-02 | 0.87  | 0.74  |
| <i>lpg1703</i> | SOS mutagenesis and repair UmuC protein                                |              | Replication and Repair                     | 9.533  | 10.715 | 9.063  | 10.067   | 2.42E-03 | 2.74E-04 | 1.18  | 1.00  |
| <i>lpg1704</i> | SOS (error prone) mutagenesis protein UmuD (RumA)                      |              | Replication and Repair                     | 8.703  | 9.631  | 9.243  | 10.005   | 5.58E-02 | 1.85E-01 | 0.93  | 0.76  |
| <i>lpg1704</i> | SOS (error prone) mutagenesis protein UmuD (RumA)                      |              | Replication and Repair                     | 8.881  | 9.715  | 9.396  | 10.232   | 2.06E-02 | 1.06E-01 | 0.83  | 0.84  |
| <i>lpg1705</i> | carboxypeptidase G2 (peptidase, M20/M25/M40 family)                    |              | Protein fate / hydrolases / secretion      | 10.733 | 10.432 | 10.335 | 10.404   | 3.70E-01 | 8.56E-01 | -0.30 | 0.07  |
| <i>lpg1705</i> | carboxypeptidase G2 (peptidase, M20/M25/M40 family)                    |              | Protein fate / hydrolases / secretion      | 10.742 | 10.271 | 10.173 | 10.421   | 2.26E-01 | 5.81E-01 | -0.47 | 0.25  |
| <i>lpg1706</i> | arginine/ornithine succinyltransferase (arginine-N-succinyltransferase |              | Amino Acid Metabolism                      | 10.359 | 9.828  | 9.807  | 10.096   | 1.96E-01 | 6.51E-01 | -0.53 | 0.29  |
| <i>lpg1706</i> | arginine/ornithine succinyltransferase (arginine-N-succinyltransferase |              | Amino Acid Metabolism                      | 10.340 | 10.005 | 9.859  | 10.151   | 3.85E-01 | 4.82E-01 | -0.33 | 0.29  |

|                |                                                              |               |                                            |        |        |        |        |          |          |       |       |
|----------------|--------------------------------------------------------------|---------------|--------------------------------------------|--------|--------|--------|--------|----------|----------|-------|-------|
| <i>lpg1707</i> | succinylglutamic-5-semialdehyde dehydrogenase (aldehy        | <i>aruD</i>   | Amino Acid Metabolism, Biodegradatic       | 10.966 | 11.759 | 10.804 | 12.011 | 1.34E-02 | 3.38E-03 | 0.79  | 1.21  |
| <i>lpg1707</i> | succinylglutamic-5-semialdehyde dehydrogenase (aldehy        | <i>aruD</i>   | Amino Acid Metabolism, Biodegradatic       | 11.403 | 12.327 | 10.880 | 12.403 | 1.32E-01 | 6.20E-03 | 0.92  | 1.52  |
| <i>lpg1708</i> | succinylarginine dihydrolase                                 | <i>astB</i>   | Amino Acid Metabolism, Nucleotide M        | 11.946 | 11.875 | 12.523 | 11.625 | 7.88E-01 | 4.05E-02 | -0.07 | -0.90 |
| <i>lpg1708</i> | succinylarginine dihydrolase                                 | <i>astB</i>   | Amino Acid Metabolism, Nucleotide M        | 11.785 | 11.954 | 10.277 | 11.723 | 6.80E-01 | 3.97E-03 | 0.17  | 1.45  |
| <i>lpg1709</i> | conserved hypothetical protein                               |               | Unknown / hypothetical proteins            | 10.929 | 9.493  | 9.699  | 9.752  | 4.61E-02 | 9.26E-01 | -1.44 | 0.05  |
| <i>lpg1709</i> | conserved hypothetical protein                               |               | Unknown / hypothetical proteins            | 11.090 | 10.069 | 9.592  | 10.164 | 8.18E-02 | 2.37E-01 | -1.02 | 0.57  |
| <i>lpg1710</i> | small ORF (121aa)                                            |               | ORFs of unknown function (unique)          | 10.630 | 9.353  | 9.666  | 8.862  | 1.21E-02 | 2.17E-02 | -1.28 | -0.80 |
| <i>lpg1710</i> | small ORF (121aa)                                            |               | ORFs of unknown function (unique)          | 10.468 | 9.072  | 9.823  | 9.042  | 1.50E-02 | 7.61E-02 | -1.40 | -0.78 |
| <i>lpg1711</i> | ribosome recycling factor (ribosome releasing factor)        | <i>frr</i>    | Translation                                | 12.573 | 14.088 | 12.104 | 12.040 | 9.37E-04 | 8.05E-01 | 1.51  | -0.06 |
| <i>lpg1711</i> | ribosome recycling factor (ribosome releasing factor)        | <i>frr</i>    | Translation                                | 12.638 | 14.346 | 11.994 | 12.483 | 3.85E-04 | 4.09E-01 | 1.71  | 0.49  |
| <i>lpg1712</i> | uridylylate kinase (uridine monophosphate kinase)            | <i>pyrH</i>   | Nucleotide Metabolism                      | 12.307 | 11.965 | 10.978 | 12.389 | 6.75E-01 | 1.24E-02 | -0.34 | 1.41  |
| <i>lpg1712</i> | uridylylate kinase (uridine monophosphate kinase)            | <i>pyrH</i>   | Nucleotide Metabolism                      | 12.298 | 11.990 | 10.996 | 12.520 | 7.15E-01 | 7.85E-03 | -0.31 | 1.52  |
| <i>lpg1713</i> | translation elongation factor Ts (EF-Ts) (ubiquitin associa  | <i>tsf</i>    | Translation                                | 12.833 | 12.585 | 10.948 | 13.225 | 6.44E-01 | 5.79E-03 | -0.25 | 2.28  |
| <i>lpg1713</i> | translation elongation factor Ts (EF-Ts) (ubiquitin associa  | <i>tsf</i>    | Translation                                | 12.988 | 12.544 | 10.749 | 13.249 | 4.15E-01 | 4.83E-03 | -0.44 | 2.50  |
| <i>lpg1714</i> | 30S ribosomal protein S2                                     | <i>rpsB</i>   | Translation                                | 13.720 | 14.022 | 11.217 | 14.768 | 5.24E-01 | 4.57E-04 | 0.30  | 3.55  |
| <i>lpg1714</i> | 30S ribosomal protein S2                                     | <i>rpsB</i>   | Translation                                | 13.692 | 14.052 | 11.197 | 14.782 | 5.26E-01 | 3.71E-04 | 0.36  | 3.59  |
| <i>lpg1715</i> | 16 kD immunogenic protein                                    |               | Named proteins of general function         | 15.054 | 14.261 | 14.762 | 14.039 | 5.72E-01 | 5.37E-01 | -0.79 | -0.72 |
| <i>lpg1715</i> | 16 kD immunogenic protein                                    |               | Named proteins of general function         | 15.027 | 14.799 | 14.755 | 14.505 | 7.50E-01 | 7.08E-01 | -0.23 | -0.25 |
| <i>lpg1716</i> | small ORF (152aa)                                            |               | ORFs of unknown function (unique)          | 13.219 | 13.122 | 11.397 | 11.847 | 8.60E-01 | 2.35E-01 | -0.10 | 0.45  |
| <i>lpg1716</i> | small ORF (152aa)                                            |               | ORFs of unknown function (unique)          | 13.287 | 13.081 | 11.164 | 11.823 | 6.90E-01 | 2.37E-01 | -0.21 | 0.66  |
| <i>lpg1717</i> | hypothetical protein                                         |               | Unknown / hypothetical proteins            | 8.777  | 9.846  | 9.148  | 8.909  | 1.84E-02 | 6.08E-01 | 1.07  | -0.24 |
| <i>lpg1717</i> | hypothetical protein                                         |               | Unknown / hypothetical proteins            | 8.657  | 9.608  | 8.746  | 8.663  | 5.17E-02 | 7.75E-01 | 0.95  | -0.08 |
| <i>lpg1718</i> | huntingtin interacting protein B                             | <i>LegAS4</i> | Named proteins of general function         | 10.821 | 12.696 | 11.505 | 10.348 | 6.23E-03 | 1.39E-02 | 1.88  | -1.16 |
| <i>lpg1718</i> | huntingtin interacting protein B                             | <i>LegAS4</i> | Named proteins of general function         | 10.806 | 12.969 | 11.563 | 10.606 | 1.05E-03 | 3.79E-02 | 2.16  | -0.96 |
| <i>lpg1719</i> | methionine aminopeptidase                                    | <i>map</i>    | Protein fate / hydrolases / secretion      | 13.118 | 12.543 | 11.257 | 13.071 | 4.47E-01 | 7.32E-02 | -0.57 | 1.81  |
| <i>lpg1719</i> | methionine aminopeptidase                                    | <i>map</i>    | Protein fate / hydrolases / secretion      | 13.196 | 12.927 | 11.044 | 13.798 | 5.86E-01 | 2.41E-04 | -0.27 | 2.75  |
| <i>lpg1720</i> | protein-PilI uridylyltransferase                             | <i>glnD</i>   | Signal transduction / other regulatory f   | 10.585 | 8.841  | 9.419  | 9.988  | 3.39E-03 | 2.32E-01 | -1.74 | 0.57  |
| <i>lpg1720</i> | protein-PilI uridylyltransferase                             | <i>glnD</i>   | Signal transduction / other regulatory f   | 10.722 | 9.707  | 8.973  | 10.187 | 1.93E-01 | 1.19E-01 | -1.02 | 1.21  |
| <i>lpg1721</i> | deaminase (zinc binding protein) (zinc binding hydrolase)    | <i>yfhC</i>   | Nucleotide Metabolism                      | 11.211 | 10.624 | 12.014 | 9.878  | 3.00E-01 | 2.62E-03 | -0.59 | -2.14 |
| <i>lpg1721</i> | deaminase (zinc binding protein) (zinc binding hydrolase)    | <i>yfhC</i>   | Nucleotide Metabolism                      | 11.115 | 10.208 | 11.862 | 10.024 | 6.00E-02 | 1.10E-02 | -0.91 | -1.84 |
| <i>lpg1722</i> | GMP synthetase                                               | <i>guaA</i>   | Nucleotide Metabolism, Amino Acid M        | 10.973 | 11.338 | 10.809 | 11.356 | 2.95E-01 | 1.15E-01 | 0.37  | 0.55  |
| <i>lpg1722</i> | GMP synthetase                                               | <i>guaA</i>   | Nucleotide Metabolism, Amino Acid M        | 10.977 | 12.091 | 10.830 | 11.989 | 9.95E-02 | 6.98E-02 | 1.11  | 1.16  |
| <i>lpg1723</i> | inosine-5'-monophosphate dehydrogenase                       | <i>guaB</i>   | Nucleotide Metabolism                      | 11.047 | 12.371 | 11.532 | 11.798 | 9.68E-05 | 2.54E-01 | 1.32  | 0.27  |
| <i>lpg1723</i> | inosine-5'-monophosphate dehydrogenase                       | <i>guaB</i>   | Nucleotide Metabolism                      | 11.223 | 12.340 | 11.467 | 11.960 | 2.93E-04 | 1.73E-02 | 1.12  | 0.49  |
| <i>lpg1724</i> | septum site-determining protein MinD (cell division inhibi   | <i>minD</i>   | Chemotaxis / motility / cell division, Siç | 13.584 | 13.805 | 12.308 | 12.651 | 7.53E-01 | 5.58E-01 | 0.22  | 0.34  |
| <i>lpg1724</i> | septum site-determining protein MinD (cell division inhibi   | <i>minD</i>   | Chemotaxis / motility / cell division, Siç | 13.567 | 13.889 | 12.273 | 13.016 | 6.21E-01 | 5.21E-02 | 0.32  | 0.74  |
| <i>lpg1725</i> | septum formation (cell division) topological specificity fac | <i>minE</i>   | Chemotaxis / motility / cell division      | 12.342 | 11.949 | 12.206 | 10.960 | 3.84E-01 | 5.50E-04 | -0.39 | -1.25 |
| <i>lpg1725</i> | septum formation (cell division) topological specificity fac | <i>minE</i>   | Chemotaxis / motility / cell division      | 12.252 | 11.671 | 12.042 | 10.949 | 2.39E-01 | 2.33E-03 | -0.58 | -1.09 |
| <i>lpg1726</i> | oxidoreductase, acyl CoA dehydrogenase family (acyl Cc       | <i>yafH</i>   | Lipid Metabolism, Metabolism of Com        | 12.036 | 11.803 | 13.613 | 11.462 | 8.02E-01 | 8.50E-04 | -0.23 | -2.15 |
| <i>lpg1726</i> | oxidoreductase, acyl CoA dehydrogenase family (acyl Cc       | <i>yafH</i>   | Lipid Metabolism, Metabolism of Com        | 12.021 | 12.064 | 13.624 | 11.622 | 9.54E-01 | 1.63E-03 | 0.04  | -2.00 |
| <i>lpg1727</i> | hydrolase                                                    |               | Protein fate / hydrolases / secretion      | 12.243 | 10.891 | 11.144 | 11.988 | 1.37E-03 | 3.38E-02 | -1.35 | 0.84  |
| <i>lpg1727</i> | hydrolase                                                    |               | Protein fate / hydrolases / secretion      | 12.387 | 10.278 | 11.109 | 11.966 | 1.13E-03 | 2.76E-02 | -2.11 | 0.86  |
| <i>lpg1728</i> | unknown                                                      |               | Unknown / hypothetical proteins            | 11.969 | 10.956 | 11.068 | 11.772 | 1.90E-02 | 3.73E-03 | -1.01 | 0.70  |
| <i>lpg1728</i> | unknown                                                      |               | Unknown / hypothetical proteins            | 12.049 | 10.186 | 11.051 | 11.762 | 1.14E-01 | 5.78E-03 | -1.86 | 0.71  |
| <i>lpg1729</i> | sn-glycerol-3-phosphate transport, ATP binding protein       | <i>ugpC</i>   | Transport and binding                      | 10.857 | 9.523  | 10.471 | 9.585  | 1.76E-03 | 1.94E-02 | -1.33 | -0.89 |
| <i>lpg1729</i> | sn-glycerol-3-phosphate transport, ATP binding protein       | <i>ugpC</i>   | Transport and binding                      | 10.721 | 9.649  | 10.417 | 9.813  | 6.78E-03 | 5.02E-02 | -1.07 | -0.60 |
| <i>lpg1730</i> | sn-glycerol-3-phosphate transmembrane ABC transporte         | <i>ugpE</i>   | Transport and binding                      | 12.043 | 10.764 | 11.134 | 9.478  | 1.05E-01 | 3.72E-01 | -1.28 | -1.66 |
| <i>lpg1730</i> | sn-glycerol-3-phosphate transmembrane ABC transporte         | <i>ugpE</i>   | Transport and binding                      | 12.017 | 10.221 | 11.382 | 10.111 | 9.75E-07 | 2.12E-03 | -1.80 | -1.27 |
| <i>lpg1731</i> | sn-glycerol-3-phosphate transmembrane ABC transporte         | <i>ugpA</i>   | Transport and binding                      | 11.129 | 10.144 | 10.450 | 9.265  | 9.33E-03 | 1.73E-03 | -0.98 | -1.19 |
| <i>lpg1731</i> | sn-glycerol-3-phosphate transmembrane ABC transporte         | <i>ugpA</i>   | Transport and binding                      | 11.084 | 10.289 | 10.413 | 9.639  | 2.68E-02 | 1.34E-02 | -0.79 | -0.77 |
| <i>lpg1732</i> | quinone oxidoreductase (alcohol dehydrogenase, zinc cc       | <i>qor</i>    | Named proteins of general function         | 9.289  | 10.018 | 10.234 | 10.228 | 7.99E-02 | 9.84E-01 | 0.73  | -0.01 |
| <i>lpg1732</i> | quinone oxidoreductase (alcohol dehydrogenase, zinc cc       | <i>qor</i>    | Named proteins of general function         | 9.585  | 10.561 | 10.215 | 10.347 | 4.99E-03 | 6.63E-01 | 0.98  | 0.13  |
| <i>lpg1733</i> | chloride channel protein EriC (voltage gated)                |               | Transport and binding                      | 11.186 | 9.835  | 9.324  | 9.979  | 8.50E-03 | 2.62E-01 | -1.35 | 0.65  |
| <i>lpg1733</i> | chloride channel protein EriC (voltage gated)                |               | Transport and binding                      | 11.161 | 10.380 | 9.432  | 10.258 | 1.26E-02 | 6.54E-02 | -0.78 | 0.83  |
| <i>lpg1734</i> | anthranilate synthase (glutamine amidotransferase) component | I             | Amino Acid Metabolism                      | 11.951 | 12.181 | 10.890 | 11.919 | 6.29E-01 | 4.85E-02 | 0.23  | 1.03  |
| <i>lpg1734</i> | anthranilate synthase (glutamine amidotransferase) component | I             | Amino Acid Metabolism                      | 11.979 | 12.181 | 10.814 | 12.026 | 6.78E-01 | 2.58E-02 | 0.20  | 1.21  |
| <i>lpg1735</i> | glutamyl/tRNA (Gln) amidotransferase, C subunit              | <i>gatC</i>   | DNA/RNA degradation / restriction, Tr      | 9.359  | 9.926  | 9.177  | 9.858  | 1.50E-01 | 2.29E-01 | 0.57  | 0.68  |
| <i>lpg1735</i> | glutamyl/tRNA (Gln) amidotransferase, C subunit              | <i>gatC</i>   | DNA/RNA degradation / restriction, Tr      | 9.503  | 9.787  | 8.863  | 9.775  | 5.23E-01 | 1.76E-01 | 0.28  | 0.91  |
| <i>lpg1736</i> | glutamyl/tRNA (Gln) amidotransferase, A subunit              | <i>gatA</i>   | DNA/RNA degradation / restriction, Tr      | 10.350 | 10.877 | 8.856  | 10.272 | 2.57E-01 | 8.68E-02 | 0.53  | 1.42  |
| <i>lpg1736</i> | glutamyl/tRNA (Gln) amidotransferase, A subunit              | <i>gatA</i>   | DNA/RNA degradation / restriction, Tr      | 10.383 | 10.718 | 8.253  | 10.160 | 3.91E-01 | 1.72E-01 | 0.34  | 1.91  |
| <i>lpg1737</i> | glutamyl/tRNA (Gln) amidotransferase, B subunit              | <i>gatB</i>   | DNA/RNA degradation / restriction, Tr      | 11.268 | 12.873 | 11.636 | 12.712 | 1.67E-04 | 3.05E-04 | 1.60  | 1.08  |
| <i>lpg1737</i> | glutamyl/tRNA (Gln) amidotransferase, B subunit              | <i>gatB</i>   | DNA/RNA degradation / restriction, Tr      | 11.355 | 12.699 | 10.855 | 12.366 | 4.49E-04 | 1.45E-03 | 1.34  | 1.51  |
| <i>lpg1738</i> | ORF                                                          |               | ORFs of unknown function (unique)          | 12.493 | 12.231 | 10.360 | 12.652 | 5.36E-01 | 8.31E-04 | -0.26 | 2.29  |
| <i>lpg1738</i> | ORF                                                          |               | ORFs of unknown function (unique)          | 12.423 | 11.892 | 9.601  | 12.033 | 3.13E-01 | 1.90E-02 | -0.53 | 2.43  |

|                |                                                                                         |                                            |        |        |        |        |          |          |       |       |
|----------------|-----------------------------------------------------------------------------------------|--------------------------------------------|--------|--------|--------|--------|----------|----------|-------|-------|
| <i>lpg1739</i> | adenylate/guanylate cyclase transmembrane protein ( <i>adk gidA</i> )                   | Nucleotide Metabolism                      | 8.793  | 7.556  | 8.964  | 7.687  | 2.17E-01 | 4.52E-02 | -1.24 | -1.28 |
| <i>lpg1739</i> | adenylate/guanylate cyclase transmembrane protein ( <i>adk gidA</i> )                   | Nucleotide Metabolism                      | 9.052  | 7.634  | 8.792  | 8.150  | 2.80E-01 | 3.49E-01 | -1.42 | -0.64 |
| <i>lpg1740</i> | small ORF (154aa)                                                                       | ORFs of unknown function (unique)          | 11.865 | 13.062 | 11.262 | 11.633 | 2.69E-02 | 1.57E-01 | 1.20  | 0.37  |
| <i>lpg1740</i> | small ORF (154aa)                                                                       | ORFs of unknown function (unique)          | 11.725 | 12.950 | 11.174 | 11.623 | 7.86E-02 | 1.90E-01 | 1.23  | 0.45  |
| <i>lpg1741</i> | conserved hypothetical protein                                                          | Unknown / hypothetical proteins            | 9.878  | 11.267 | 10.788 | 11.048 | 1.61E-02 | 2.59E-01 | 1.39  | 0.26  |
| <i>lpg1741</i> | conserved hypothetical protein                                                          | Unknown / hypothetical proteins            | 9.869  | 11.518 | 10.532 | 11.493 | 2.51E-02 | 7.73E-03 | 1.65  | 0.96  |
| <i>lpg1742</i> | conserved hypothetical protein                                                          | Unknown / hypothetical proteins            | 10.087 | 10.877 | 10.141 | 10.851 | 2.83E-01 | 7.49E-02 | 0.79  | 0.71  |
| <i>lpg1742</i> | conserved hypothetical protein                                                          | Unknown / hypothetical proteins            | 10.596 | 11.008 | 9.816  | 10.888 | 1.69E-01 | 4.85E-02 | 0.41  | 1.07  |
| <i>lpg1743</i> | Fis transcriptional activator (factor for inversion stimulative <i>fis</i> )            | Transcription factors / DNA binding prc    | 10.993 | 13.543 | 10.358 | 11.851 | 4.76E-04 | 3.42E-02 | 2.55  | 1.49  |
| <i>lpg1743</i> | Fis transcriptional activator (factor for inversion stimulative <i>fis</i> )            | Transcription factors / DNA binding prc    | 11.040 | 13.569 | 9.969  | 11.807 | 6.01E-04 | 1.09E-01 | 2.53  | 1.84  |
| <i>lpg1744</i> | HesB family protein (iron binding protein <i>IscA</i> ) [Fe-S] clus <i>ydiC</i>         | Transport and binding                      | 11.587 | 10.588 | 11.529 | 10.989 | 1.56E-01 | 8.44E-03 | -1.00 | -0.54 |
| <i>lpg1744</i> | HesB family protein (iron binding protein <i>IscA</i> ) [Fe-S] clus <i>ydiC</i>         | Transport and binding                      | 11.966 | 11.067 | 11.551 | 11.692 | 2.14E-01 | 8.17E-01 | -0.90 | 0.14  |
| <i>lpg1745</i> | NifU family iron binding protein, [Fe-S] cluster formation/repair protein               | Signal transduction / other regulatory f   | 9.904  | 10.541 | 10.227 | 10.242 | 4.11E-01 | 9.74E-01 | 0.64  | 0.02  |
| <i>lpg1745</i> | NifU family iron binding protein, [Fe-S] cluster formation/repair protein               | Signal transduction / other regulatory f   | 10.502 | 10.818 | 10.105 | 10.626 | 4.66E-01 | 3.05E-01 | 0.32  | 0.52  |
| <i>lpg1746</i> | cysteine desulfurase (aminotransferase <i>NifS</i> ) (cysteine <i>s</i> <i>iscS</i> )   | Amino Acid Metabolism                      | 12.579 | 12.057 | 11.498 | 11.716 | 6.72E-02 | 4.51E-01 | -0.52 | 0.22  |
| <i>lpg1746</i> | cysteine desulfurase (aminotransferase <i>NifS</i> ) (cysteine <i>s</i> <i>iscS</i> )   | Amino Acid Metabolism                      | 12.574 | 12.034 | 11.293 | 11.810 | 9.31E-02 | 2.77E-01 | -0.54 | 0.52  |
| <i>lpg1747</i> | RNA methyltransferase (TrmH family) (SpoU family-rRNA methylase)                        | DNA/RNA degradation / restriction, Trz     | 12.014 | 9.904  | 10.052 | 10.983 | 5.48E-03 | 1.03E-01 | -2.11 | 0.93  |
| <i>lpg1747</i> | RNA methyltransferase (TrmH family) (SpoU family-rRNA methylase)                        | DNA/RNA degradation / restriction, Trz     | 11.911 | 10.192 | 9.435  | 10.882 | 6.76E-02 | 1.19E-01 | -1.72 | 1.45  |
| <i>lpg1748</i> | inositol-1-monophosphatase (extra-genic suppressor prot. <i>suhB</i> )                  | Biosynthesis of Secondary Metabolites      | 10.134 | 10.145 | 10.261 | 10.168 | 9.65E-01 | 8.07E-01 | 0.01  | -0.09 |
| <i>lpg1748</i> | inositol-1-monophosphatase (extra-genic suppressor prot. <i>suhB</i> )                  | Biosynthesis of Secondary Metabolites      | 10.315 | 9.922  | 10.332 | 10.280 | 3.20E-01 | 7.99E-01 | -0.39 | -0.05 |
| <i>lpg1749</i> | signal peptide peptidase (peptidase U7 family) <i>sppA</i>                              | Protein fate / hydrolases / secretion      | 9.782  | 9.619  | 8.657  | 9.608  | 8.57E-01 | 1.73E-01 | -0.16 | 0.95  |
| <i>lpg1749</i> | signal peptide peptidase (peptidase U7 family) <i>sppA</i>                              | Protein fate / hydrolases / secretion      | 10.303 | 10.347 | 8.532  | 10.540 | 9.52E-01 | 2.39E-02 | 0.04  | 2.01  |
| <i>lpg1750</i> | ClpB protein (heat shock protein) Clp ATPase (ATP-depe <i>clpB</i> )                    | Detoxification / adaptation, Protein fate  | 11.450 | 11.414 | 12.389 | 12.066 | 9.41E-01 | 4.21E-01 | -0.04 | -0.32 |
| <i>lpg1750</i> | ClpB protein (heat shock protein) Clp ATPase (ATP-depe <i>clpB</i> )                    | Detoxification / adaptation, Protein fate  | 11.305 | 11.620 | 12.290 | 12.056 | 4.85E-01 | 5.96E-01 | 0.31  | -0.23 |
| <i>lpg1751</i> | ORF                                                                                     | ORFs of unknown function (unique)          | 8.742  | 11.713 | 9.796  | 10.402 | 8.81E-04 | 3.97E-01 | 2.97  | 0.61  |
| <i>lpg1751</i> | ORF                                                                                     | ORFs of unknown function (unique)          | 8.901  | 11.952 | 9.249  | 10.787 | 2.92E-05 | 4.94E-03 | 3.05  | 1.54  |
| <i>lpg1752</i> | ORF                                                                                     | ORFs of unknown function (unique)          | 10.000 | 11.920 | 10.781 | 10.375 | 1.29E-03 | 2.10E-01 | 1.92  | -0.41 |
| <i>lpg1752</i> | ORF                                                                                     | ORFs of unknown function (unique)          | 10.352 | 12.036 | 10.635 | 10.572 | 3.07E-04 | 8.36E-01 | 1.68  | -0.06 |
| <i>lpg1753</i> | UDP-N-acetylmuramate:L-alanyl-gamma-D-glutamyl-met <i>mpl</i>                           | Cell envelope synthesis, Amino Acid M      | 11.112 | 11.280 | 10.669 | 11.169 | 7.10E-01 | 2.79E-02 | 0.17  | 0.50  |
| <i>lpg1753</i> | UDP-N-acetylmuramate:L-alanyl-gamma-D-glutamyl-met <i>mpl</i>                           | Cell envelope synthesis, Amino Acid M      | 11.018 | 11.340 | 10.528 | 11.195 | 5.43E-01 | 2.10E-02 | 0.32  | 0.67  |
| <i>lpg1754</i> | ORF                                                                                     | ORFs of unknown function (unique)          | 8.885  | 8.619  | 8.598  | 8.820  | 7.56E-01 | 8.22E-01 | -0.27 | 0.22  |
| <i>lpg1754</i> | ORF                                                                                     | ORFs of unknown function (unique)          | 8.885  | 9.399  | 8.599  | 8.836  | 6.02E-01 | 8.54E-01 | 0.51  | 0.24  |
| <i>lpg1755</i> | transmembrane protein (protease?)                                                       | Named proteins of general function         | 10.533 | 8.135  | 8.910  | 9.457  | 1.19E-03 | 4.09E-01 | -2.40 | 0.55  |
| <i>lpg1755</i> | transmembrane protein (protease?)                                                       | Named proteins of general function         | 10.560 | 7.993  | 8.717  | 9.471  | 2.49E-03 | 3.02E-01 | -2.57 | 0.75  |
| <i>lpg1756</i> | flagellar protein <i>FliJ</i>                                                           | Chemotaxis / motility / cell division      | 9.951  | 9.265  | 9.982  | 9.536  | 3.90E-01 | 2.70E-01 | -0.69 | -0.45 |
| <i>lpg1756</i> | flagellar protein <i>FliJ</i>                                                           | Chemotaxis / motility / cell division      | 9.632  | 9.305  | 9.613  | 9.405  | 6.13E-01 | 6.35E-01 | -0.33 | -0.21 |
| <i>lpg1757</i> | nucleotide binding protein <i>FliI</i> (flagellum specific ATP syn <i>fliI</i> )        | Chemotaxis / motility / cell division, Sig | 10.402 | 10.468 | 9.627  | 10.918 | 7.87E-01 | 7.23E-03 | 0.07  | 1.29  |
| <i>lpg1757</i> | nucleotide binding protein <i>FliI</i> (flagellum specific ATP syn <i>fliI</i> )        | Chemotaxis / motility / cell division, Sig | 10.576 | 11.991 | 10.051 | 12.136 | 7.34E-02 | 1.69E-02 | 1.42  | 2.08  |
| <i>lpg1758</i> | flagellar assembly protein <i>FliH</i> (export of flagellar protein: <i>fliH</i> )      | Transport and binding, Chemotaxis / r      | 10.148 | 9.680  | 11.312 | 10.261 | 4.27E-01 | 3.45E-02 | -0.47 | -1.05 |
| <i>lpg1758</i> | flagellar assembly protein <i>FliH</i> (export of flagellar protein: <i>fliH</i> )      | Transport and binding, Chemotaxis / r      | 10.021 | 10.115 | 11.213 | 10.394 | 7.79E-01 | 4.57E-02 | 0.09  | -0.82 |
| <i>lpg1759</i> | flagellar motor switch protein <i>FliG</i>                                              | Chemotaxis / motility / cell division      | 7.900  | 7.713  | 9.250  | 7.844  | 7.18E-01 | 1.66E-01 | -0.19 | -1.41 |
| <i>lpg1759</i> | flagellar motor switch protein <i>FliG</i>                                              | Chemotaxis / motility / cell division      | 8.109  | 8.261  | 9.137  | 8.723  | 9.30E-01 | 7.71E-01 | 0.15  | -0.41 |
| <i>lpg1760</i> | flagellar basal body M-ring protein <i>FliF</i>                                         | Chemotaxis / motility / cell division      | 11.038 | 10.197 | 10.261 | 9.004  | 3.46E-02 | 2.88E-01 | -0.84 | -1.26 |
| <i>lpg1760</i> | flagellar basal body M-ring protein <i>FliF</i>                                         | Chemotaxis / motility / cell division      | 10.824 | 10.012 | 10.476 | 9.764  | 2.00E-01 | 5.02E-03 | -0.81 | -0.71 |
| <i>lpg1761</i> | flagellar hook-basal body protein <i>FliE</i>                                           | Chemotaxis / motility / cell division      | 8.918  | 10.172 | 9.241  | 9.406  | 8.42E-03 | 5.02E-01 | 1.25  | 0.16  |
| <i>lpg1761</i> | flagellar hook-basal body protein <i>FliE</i>                                           | Chemotaxis / motility / cell division      | 8.347  | 10.216 | 9.251  | 9.493  | 9.04E-03 | 5.46E-01 | 1.87  | 0.24  |
| <i>lpg1762</i> | sigma 54-dependent response regulator (two component <i>fleR</i> )                      | Chemotaxis / motility / cell division, Sig | 10.705 | 9.807  | 10.257 | 8.852  | 1.39E-01 | 5.66E-02 | -0.90 | -1.40 |
| <i>lpg1762</i> | sigma 54-dependent response regulator (two component <i>fleR</i> )                      | Chemotaxis / motility / cell division, Sig | 10.756 | 9.309  | 10.293 | 9.369  | 1.26E-02 | 7.25E-02 | -1.45 | -0.92 |
| <i>lpg1763</i> | sensor kinase <i>HydH</i> (two component sensor) (flagellar re <i>fliR</i> )            | Chemotaxis / motility / cell division      | 9.538  | 9.586  | 9.530  | 8.146  | 9.38E-01 | 3.17E-01 | 0.05  | -1.38 |
| <i>lpg1763</i> | sensor kinase <i>HydH</i> (two component sensor) (flagellar re <i>fliR</i> )            | Chemotaxis / motility / cell division, Sig | 9.676  | 7.954  | 9.508  | 8.814  | 8.58E-03 | 6.59E-02 | -1.72 | -0.69 |
| <i>lpg1764</i> | ATPase associated with chromosome architecture (ATPase, AAA fam                         | DNA/RNA degradation / restriction          | 11.943 | 10.752 | 12.429 | 11.677 | 2.06E-03 | 1.15E-02 | -1.19 | -0.75 |
| <i>lpg1764</i> | ATPase associated with chromosome architecture (ATPase, AAA fam                         | DNA/RNA degradation / restriction          | 11.722 | 10.695 | 12.068 | 11.793 | 5.30E-02 | 1.53E-01 | -1.03 | -0.27 |
| <i>lpg1765</i> | outer membrane lipoprotein carrier protein (periplasmic <i>c</i> <i>loIA</i> )          | Transport and binding                      | 9.761  | 9.928  | 11.771 | 9.076  | 8.10E-01 | 5.00E-03 | 0.17  | -2.69 |
| <i>lpg1765</i> | outer membrane lipoprotein carrier protein (periplasmic <i>c</i> <i>loIA</i> )          | Transport and binding                      | 10.014 | 10.383 | 11.878 | 9.959  | 5.83E-01 | 6.29E-02 | 0.37  | -1.92 |
| <i>lpg1766</i> | cell division protein <i>FtsK</i> (DNA translocase <i>FtsK</i> ) (sporul: <i>ftsK</i> ) | Chemotaxis / motility / cell division      | 12.201 | 11.941 | 11.599 | 12.909 | 4.64E-01 | 1.19E-03 | -0.26 | 1.31  |
| <i>lpg1766</i> | cell division protein <i>FtsK</i> (DNA translocase <i>FtsK</i> ) (sporul: <i>ftsK</i> ) | Chemotaxis / motility / cell division      | 12.233 | 12.176 | 11.651 | 13.075 | 8.22E-01 | 3.97E-04 | -0.06 | 1.42  |
| <i>lpg1767</i> | thioredoxin reductase <i>trxB1</i>                                                      | Nucleotide Metabolism                      | 11.462 | 13.706 | 11.060 | 13.005 | 8.86E-02 | 1.20E-02 | 2.24  | 1.94  |
| <i>lpg1767</i> | thioredoxin reductase <i>trxB1</i>                                                      | Nucleotide Metabolism                      | 11.514 | 14.005 | 11.083 | 13.088 | 2.27E-02 | 5.28E-03 | 2.49  | 2.00  |
| <i>lpg1768</i> | leucyl/phenylalanyl-tRNA protein transferase <i>aat</i>                                 | DNA/RNA degradation / restriction, Trz     | 12.356 | 11.864 | 10.816 | 11.905 | 2.79E-01 | 1.63E-02 | -0.49 | 1.09  |
| <i>lpg1768</i> | leucyl/phenylalanyl-tRNA protein transferase <i>aat</i>                                 | DNA/RNA degradation / restriction, Trz     | 12.327 | 12.240 | 10.887 | 12.074 | 6.10E-01 | 4.26E-03 | -0.09 | 1.19  |
| <i>lpg1769</i> | rhodanese domain protein                                                                | Named proteins of general function         | 11.726 | 10.959 | 11.692 | 10.815 | 3.57E-02 | 6.57E-04 | -0.77 | -0.88 |
| <i>lpg1769</i> | rhodanese domain protein                                                                | Named proteins of general function         | 11.533 | 10.688 | 11.703 | 10.922 | 1.19E-01 | 6.16E-03 | -0.85 | -0.78 |
| <i>lpg1770</i> | translation initiation factor IF-1 <i>infA</i>                                          | Translation                                | 13.834 | 12.382 | 10.566 | 12.771 | 1.92E-01 | 2.56E-02 | -1.45 | 2.20  |
| <i>lpg1770</i> | translation initiation factor IF-1 <i>infA</i>                                          | Translation                                | 13.483 | 11.844 | 9.883  | 12.288 | 2.41E-01 | 6.67E-02 | -1.64 | 2.40  |

|                |                                                                   |              |                                           |        |        |        |        |          |          |       |       |
|----------------|-------------------------------------------------------------------|--------------|-------------------------------------------|--------|--------|--------|--------|----------|----------|-------|-------|
| <i>lpg1771</i> | peptide maturation protein PmbA (microcin (peptide anti           | <i>pmbA</i>  | Named proteins of general function        | 10.267 | 11.808 | 9.855  | 11.036 | 1.71E-03 | 1.41E-02 | 1.54  | 1.18  |
| <i>lpg1771</i> | peptide maturation protein PmbA (microcin (peptide anti           | <i>pmbA</i>  | Named proteins of general function        | 10.175 | 11.768 | 9.530  | 11.182 | 2.29E-04 | 2.76E-03 | 1.59  | 1.65  |
| <i>lpg1772</i> | hypothetical (lipoprotein?)                                       |              | Unknown / hypothetical proteins           | 10.859 | 10.381 | 7.709  | 10.380 | 5.16E-01 | 2.44E-02 | -0.48 | 2.67  |
| <i>lpg1772</i> | hypothetical (lipoprotein?)                                       |              | Unknown / hypothetical proteins           | 11.062 | 11.466 | 7.988  | 10.918 | 6.37E-01 | 5.46E-02 | 0.40  | 2.93  |
| <i>lpg1773</i> | protein associating with small stress protein PASS1               | <i>Pass1</i> | Named proteins of general function        | 10.301 | 10.674 | 10.387 | 9.922  | 2.26E-01 | 2.38E-01 | 0.37  | -0.46 |
| <i>lpg1773</i> | protein associating with small stress protein PASS1               | <i>Pass1</i> | Named proteins of general function        | 9.940  | 10.637 | 10.190 | 9.937  | 1.47E-01 | 5.98E-01 | 0.70  | -0.25 |
| <i>lpg1774</i> | ribonucleoside-diphosphate reductase, alpha subunit (rib          | <i>nrda</i>  | Nucleotide Metabolism                     | 12.479 | 12.523 | 11.994 | 12.807 | 8.96E-01 | 4.13E-03 | 0.04  | 0.81  |
| <i>lpg1774</i> | ribonucleoside-diphosphate reductase, alpha subunit (rib          | <i>nrda</i>  | Nucleotide Metabolism                     | 12.571 | 12.519 | 11.921 | 12.844 | 8.61E-01 | 2.42E-04 | -0.05 | 0.92  |
| <i>lpg1775</i> | ribonucleoside-diphosphate reductase, beta subunit (ribo          | <i>nrdb</i>  | Nucleotide Metabolism                     | 10.259 | 10.809 | 10.780 | 10.802 | 1.54E-01 | 8.46E-01 | 0.55  | 0.02  |
| <i>lpg1775</i> | ribonucleoside-diphosphate reductase, beta subunit (ribo          | <i>nrdb</i>  | Nucleotide Metabolism                     | 10.222 | 10.688 | 10.509 | 10.729 | 2.10E-01 | 1.93E-01 | 0.47  | 0.22  |
| <i>lpg1776</i> | small ORF (161aa)                                                 |              | ORFs of unknown function (unique)         | 13.908 | 13.769 | 12.592 | 13.907 | 7.56E-01 | 1.27E-02 | -0.14 | 1.32  |
| <i>lpg1776</i> | small ORF (161aa)                                                 |              | ORFs of unknown function (unique)         | 13.873 | 14.104 | 12.486 | 14.084 | 6.51E-01 | 6.69E-03 | 0.23  | 1.60  |
| <i>lpg1777</i> | lysine tRNA synthetase, heat inducible                            | <i>lysU</i>  | Amino Acid Metabolism, Translation        | 12.925 | 12.719 | 12.406 | 13.511 | 3.83E-01 | 3.35E-04 | -0.21 | 1.10  |
| <i>lpg1777</i> | lysine tRNA synthetase, heat inducible                            | <i>lysU</i>  | Amino Acid Metabolism, Translation        | 13.021 | 12.829 | 12.388 | 13.511 | 2.71E-01 | 2.20E-04 | -0.19 | 1.12  |
| <i>lpg1778</i> | peptide chain release factor 2 (RF-2)                             | <i>prfB</i>  | Translation                               | 10.799 | 10.854 | 10.617 | 12.282 | 9.05E-01 | 1.46E-03 | 0.06  | 1.66  |
| <i>lpg1778</i> | peptide chain release factor 2 (RF-2)                             | <i>prfB</i>  | Translation                               | 10.630 | 11.260 | 10.357 | 12.752 | 5.07E-01 | 3.43E-03 | 0.63  | 2.39  |
| <i>lpg1779</i> | hypothetical                                                      |              | Unknown / hypothetical proteins           | 9.853  | 8.931  | 11.478 | 9.048  | 3.58E-02 | 3.90E-05 | -0.92 | -2.43 |
| <i>lpg1779</i> | hypothetical                                                      |              | Unknown / hypothetical proteins           | 9.781  | 9.651  | 11.502 | 9.289  | 5.31E-01 | 1.82E-04 | -0.13 | -2.21 |
| <i>lpg1780</i> | flagellar motor protein MotB (probable chemotaxis protei          | <i>motB</i>  | Chemotaxis / motility / cell division     | 8.513  | 8.139  | 9.063  | 8.439  | 4.05E-01 | 2.97E-01 | -0.37 | -0.62 |
| <i>lpg1780</i> | flagellar motor protein MotB (probable chemotaxis protei          | <i>motB</i>  | Chemotaxis / motility / cell division     | 8.721  | 8.290  | 8.957  | 8.957  | 5.74E-01 | 7.72E-01 | -0.43 | -0.31 |
| <i>lpg1781</i> | flagellar motor protein MotA (chemotaxis MotA protein)            | <i>motA</i>  | Chemotaxis / motility / cell division     | 9.602  | 8.785  | 11.345 | 7.019  | 1.71E-01 | 5.44E-04 | -0.82 | -4.33 |
| <i>lpg1781</i> | flagellar motor protein MotA (chemotaxis MotA protein)            | <i>motA</i>  | Chemotaxis / motility / cell division     | 9.499  | 7.932  | 11.416 | 7.978  | 7.21E-03 | 1.78E-06 | -1.57 | -3.44 |
| <i>lpg1782</i> | flagellar biosynthesis sigma factor FliA (motility sigma fac      | <i>fliA</i>  | Chemotaxis / motility / cell division, Tr | 9.420  | 9.150  | 12.016 | 7.067  | 7.09E-01 | 2.67E-03 | -0.27 | -4.95 |
| <i>lpg1782</i> | flagellar biosynthesis sigma factor FliA (motility sigma fac      | <i>fliA</i>  | Chemotaxis / motility / cell division, Tr | 9.275  | 8.745  | 11.993 | 8.801  | 5.14E-01 | 3.85E-03 | -0.53 | -3.19 |
| <i>lpg1783</i> | flagellar biosynthesis MinD (septum-site determining protein,     | <i>minD</i>  | Chemotaxis / motility / cell division, Tr | 10.762 | 9.958  | 12.588 | 9.443  | 1.61E-01 | 1.17E-02 | -0.80 | -3.15 |
| <i>lpg1783</i> | flagellar biosynthesis MinD (septum-site determining protein,     | <i>minD</i>  | Chemotaxis / motility / cell division, Tr | 10.702 | 10.401 | 12.506 | 10.238 | 5.78E-01 | 4.84E-03 | -0.30 | -2.27 |
| <i>lpg1784</i> | flagellar GTP-binding protein FliH (flagellar biosynthesis        | <i>fliH</i>  | Chemotaxis / motility / cell division     | 9.452  | 9.405  | 12.121 | 7.881  | 9.60E-01 | 4.78E-04 | -0.05 | -4.24 |
| <i>lpg1784</i> | flagellar GTP-binding protein FliH (flagellar biosynthesis        | <i>fliH</i>  | Chemotaxis / motility / cell division     | 9.323  | 9.620  | 12.086 | 8.247  | 7.79E-01 | 3.05E-02 | 0.30  | -3.84 |
| <i>lpg1785</i> | flagellar biosynthetic protein FliA                               | <i>fliA</i>  | Chemotaxis / motility / cell division     | 9.554  | 10.866 | 10.747 | 10.634 | 6.03E-02 | 8.05E-01 | 1.31  | -0.11 |
| <i>lpg1785</i> | flagellar biosynthetic protein FliA                               | <i>fliA</i>  | Chemotaxis / motility / cell division     | 9.709  | 11.299 | 10.782 | 11.023 | 5.75E-02 | 7.03E-01 | 1.59  | 0.24  |
| <i>lpg1786</i> | flagellar biosynthetic protein FliB                               | <i>fliB</i>  | Chemotaxis / motility / cell division     | 8.409  | 8.015  | 8.549  | 8.552  | 4.89E-01 | 9.98E-01 | -0.39 | 0.00  |
| <i>lpg1786</i> | flagellar biosynthetic protein FliB                               | <i>fliB</i>  | Chemotaxis / motility / cell division     | 8.580  | 8.450  | 8.131  | 9.039  | 8.47E-01 | 2.92E-01 | -0.13 | 0.91  |
| <i>lpg1787</i> | flagellar biosynthetic protein FliR                               | <i>fliR</i>  | Chemotaxis / motility / cell division     | 9.589  | 9.204  | 12.665 | 9.431  | 5.50E-01 | 6.56E-04 | -0.38 | -3.23 |
| <i>lpg1787</i> | flagellar biosynthetic protein FliR                               | <i>fliR</i>  | Chemotaxis / motility / cell division     | 9.444  | 9.546  | 12.614 | 9.579  | 8.77E-01 | 1.47E-03 | 0.10  | -3.03 |
| <i>lpg1788</i> | flagellar biosynthetic protein FliQ                               | <i>fliQ</i>  | Chemotaxis / motility / cell division     | 9.613  | 8.671  | 8.714  | 8.714  | 5.54E-01 | 2.80E-01 | -0.94 | -0.96 |
| <i>lpg1788</i> | flagellar biosynthetic protein FliQ                               | <i>fliQ</i>  | Chemotaxis / motility / cell division     | 9.431  | 9.637  | 8.495  | 9.535  | 6.37E-01 | 1.53E-01 | 0.21  | 1.04  |
| <i>lpg1789</i> | flagellar biosynthetic protein FliP                               | <i>fliP</i>  | Chemotaxis / motility / cell division     | 9.453  | 8.457  | 10.128 | 7.710  | 1.87E-01 | 5.58E-03 | -1.00 | -2.42 |
| <i>lpg1789</i> | flagellar biosynthetic protein FliP                               | <i>fliP</i>  | Chemotaxis / motility / cell division     | 9.371  | 8.471  | 10.245 | 8.824  | 2.21E-01 | 1.56E-02 | -0.90 | -1.42 |
| <i>lpg1790</i> | flagellar assembly protein FliO                                   | <i>fliO</i>  | Chemotaxis / motility / cell division     | 9.176  | 9.323  | 9.534  | 8.937  | 7.90E-01 | 3.65E-01 | 0.15  | -0.60 |
| <i>lpg1790</i> | flagellar assembly protein FliO                                   | <i>fliO</i>  | Chemotaxis / motility / cell division     | 9.127  | 9.157  | 9.505  | 9.006  | 9.58E-01 | 5.12E-01 | 0.03  | -0.50 |
| <i>lpg1791</i> | flagellar motor switch protein FliN                               | <i>fliN</i>  | Chemotaxis / motility / cell division     | 9.471  | 9.404  | 9.665  | 9.549  | 8.42E-01 | 7.17E-01 | -0.07 | -0.12 |
| <i>lpg1791</i> | flagellar motor switch protein FliN                               | <i>fliN</i>  | Chemotaxis / motility / cell division     | 8.893  | 8.568  | 9.560  | 9.516  | 3.83E-01 | 9.11E-01 | -0.33 | -0.04 |
| <i>lpg1792</i> | flagellar protein (flagellar motor switch protein FliM)           | <i>fliM</i>  | Chemotaxis / motility / cell division     | 10.901 | 11.055 | 12.758 | 11.431 | 7.45E-01 | 1.54E-02 | 0.15  | -1.33 |
| <i>lpg1792</i> | flagellar protein (flagellar motor switch protein FliM)           | <i>fliM</i>  | Chemotaxis / motility / cell division     | 10.964 | 11.316 | 12.745 | 11.486 | 4.25E-01 | 2.19E-02 | 0.35  | -1.26 |
| <i>lpg1793</i> | small ORF (84aa)                                                  |              | ORFs of unknown function (unique)         | 8.184  | 7.933  | 10.630 | 8.379  | 8.58E-01 | 1.06E-01 | -0.25 | -2.25 |
| <i>lpg1793</i> | small ORF (84aa)                                                  |              | ORFs of unknown function (unique)         | 7.769  | 7.961  | 10.622 | 8.970  | 8.88E-01 | 2.42E-01 | 0.19  | -1.65 |
| <i>lpg1794</i> | oxidoreductase (L-gulonolactone oxidase) (FAD/FMN containi        | <i>glx</i>   | Named proteins of general function        | 9.923  | 9.964  | 8.638  | 10.318 | 9.60E-01 | 4.00E-03 | 0.04  | 1.68  |
| <i>lpg1794</i> | oxidoreductase (L-gulonolactone oxidase) (FAD/FMN containi        | <i>glx</i>   | Named proteins of general function        | 10.789 | 9.639  | 8.478  | 10.268 | 4.88E-02 | 5.80E-03 | -1.15 | 1.79  |
| <i>lpg1795</i> | oxidoreductase, short chain dehydrogenase/reductase family,       | <i>sdh</i>   | Named proteins of general function        | 10.659 | 10.323 | 11.186 | 10.519 | 7.72E-01 | 4.66E-01 | -0.34 | -0.67 |
| <i>lpg1795</i> | oxidoreductase, short chain dehydrogenase/reductase family,       | <i>sdh</i>   | Named proteins of general function        | 10.063 | 10.297 | 10.421 | 10.568 | 7.69E-01 | 8.46E-01 | 0.23  | 0.15  |
| <i>lpg1796</i> | transcriptional regulator, LysR family                            | <i>lysR</i>  | Transcription factors / DNA binding prc   | 10.435 | 8.575  | 11.403 | 8.216  | 2.82E-03 | 4.03E-03 | -1.86 | -3.19 |
| <i>lpg1796</i> | transcriptional regulator, LysR family                            | <i>lysR</i>  | Transcription factors / DNA binding prc   | 10.589 | 9.212  | 11.509 | 8.944  | 5.90E-03 | 5.34E-04 | -1.38 | -2.56 |
| <i>lpg1797</i> | ORF                                                               |              | ORFs of unknown function (unique)         | 9.436  | 9.540  | 10.010 | 8.586  | 8.33E-01 | 3.04E-01 | 0.10  | -1.42 |
| <i>lpg1797</i> | ORF                                                               |              | ORFs of unknown function (unique)         | 9.689  | 9.878  | 9.885  | 9.010  | 6.27E-01 | 2.84E-01 | 0.19  | -0.87 |
| <i>lpg1798</i> | ORF                                                               |              | ORFs of unknown function (unique)         | 9.514  | 9.938  | 9.197  | 9.143  | 5.41E-01 | 9.33E-01 | 0.42  | -0.05 |
| <i>lpg1798</i> | ORF                                                               |              | ORFs of unknown function (unique)         | 9.702  | 10.236 | 9.264  | 9.367  | 3.76E-01 | 8.60E-01 | 0.53  | 0.10  |
| <i>lpg1799</i> | alanyl tRNA synthetase                                            | <i>alaS</i>  | Amino Acid Metabolism, Translation        | 11.481 | 11.637 | 10.046 | 12.176 | 5.92E-01 | 3.44E-02 | 0.16  | 2.13  |
| <i>lpg1799</i> | alanyl tRNA synthetase                                            | <i>alaS</i>  | Amino Acid Metabolism, Translation        | 11.782 | 11.652 | 10.035 | 12.338 | 4.62E-01 | 6.66E-03 | -0.13 | 2.30  |
| <i>lpg1800</i> | regulatory protein RecX                                           | <i>recX</i>  | Transcription factors / DNA binding prc   | 12.934 | 12.841 | 12.626 | 12.633 | 8.40E-01 | 9.83E-01 | -0.09 | 0.01  |
| <i>lpg1800</i> | regulatory protein RecX                                           | <i>recX</i>  | Transcription factors / DNA binding prc   | 12.988 | 12.915 | 12.622 | 13.010 | 8.81E-01 | 8.77E-02 | -0.07 | 0.39  |
| <i>lpg1801</i> | RecA bacterial DNA recombination protein (recombinase <i>recA</i> | <i>recA</i>  | Replication and Repair                    | 13.707 | 13.813 | 12.531 | 13.505 | 7.28E-01 | 2.45E-02 | 0.11  | 0.97  |
| <i>lpg1801</i> | RecA bacterial DNA recombination protein (recombinase <i>recA</i> | <i>recA</i>  | Replication and Repair                    | 13.678 | 13.805 | 12.509 | 13.542 | 6.66E-01 | 1.93E-02 | 0.13  | 1.03  |
| <i>lpg1802</i> | small ORF (106aa)                                                 |              | ORFs of unknown function (unique)         | 10.861 | 11.744 | 10.352 | 10.113 | 5.89E-02 | 6.75E-01 | 0.88  | -0.24 |
| <i>lpg1802</i> | small ORF (106aa)                                                 |              | ORFs of unknown function (unique)         | 10.818 | 11.487 | 10.509 | 10.271 | 2.79E-01 | 7.27E-01 | 0.67  | -0.24 |



|                |                                                                           |                                                  |        |        |        |        |          |          |       |       |
|----------------|---------------------------------------------------------------------------|--------------------------------------------------|--------|--------|--------|--------|----------|----------|-------|-------|
| <i>lpg1803</i> | hypothetical                                                              | Unknown / hypothetical proteins                  | 8.237  | 9.700  | 7.841  | 9.618  | 3.85E-02 | 1.14E-02 | 1.46  | 1.78  |
| <i>lpg1803</i> | hypothetical                                                              | Unknown / hypothetical proteins                  | 9.008  | 9.767  | 7.865  | 9.934  | 1.72E-01 | 1.13E-02 | 0.76  | 2.07  |
| <i>lpg1804</i> | hypothetical 17.2kDa protein COG1546 ClnA-related protein, competi        | Detoxification / adaptation                      | 8.489  | 8.741  | 9.450  | 9.163  | 6.93E-01 | 3.68E-01 | 0.25  | -0.29 |
| <i>lpg1804</i> | hypothetical 17.2kDa protein COG1546 ClnA-related protein, competi        | Detoxification / adaptation                      | 8.743  | 8.943  | 9.393  | 9.654  | 7.71E-01 | 5.00E-01 | 0.20  | 0.26  |
| <i>lpg1805</i> | DNA mismatch repair protein MutS                                          | <i>mutS</i> Replication and Repair               | 11.616 | 11.109 | 10.781 | 11.310 | 1.56E-01 | 1.08E-01 | -0.51 | 0.53  |
| <i>lpg1805</i> | DNA mismatch repair protein MutS                                          | <i>mutS</i> Replication and Repair               | 10.721 | 11.889 | 10.004 | 11.930 | 4.04E-01 | 3.65E-02 | 1.17  | 1.93  |
| <i>lpg1806</i> | outer membrane protein                                                    | Named proteins of general function               | 10.503 | 9.517  | 9.475  | 10.383 | 3.98E-01 | 3.36E-01 | -0.99 | 0.91  |
| <i>lpg1806</i> | outer membrane protein                                                    | Named proteins of general function               | 10.548 | 9.912  | 9.204  | 10.974 | 6.45E-01 | 1.56E-01 | -0.64 | 1.77  |
| <i>lpg1807</i> | periplasmic protein                                                       | Named proteins of general function               | 10.518 | 9.000  | 9.862  | 8.835  | 3.17E-02 | 3.93E-02 | -1.52 | -1.03 |
| <i>lpg1807</i> | periplasmic protein                                                       | Named proteins of general function               | 10.498 | 10.207 | 9.376  | 9.747  | 7.59E-01 | 7.39E-01 | -0.29 | 0.37  |
| <i>lpg1808</i> | porphobilinogen synthase (delta-aminolevulinic acid dehy                  | <i>hemB</i> Metabolism of Cofactors and Vitamins | 10.147 | 9.406  | 10.266 | 10.395 | 3.81E-02 | 5.93E-01 | -0.74 | 0.13  |
| <i>lpg1808</i> | porphobilinogen synthase (delta-aminolevulinic acid dehy                  | <i>hemB</i> Metabolism of Cofactors and Vitamins | 10.583 | 11.278 | 10.356 | 10.874 | 1.28E-01 | 7.19E-02 | 0.70  | 0.52  |
| <i>lpg1809</i> | small ORF (130aa)                                                         | ORFs of unknown function (unique)                | 14.643 | 14.252 | 13.307 | 14.709 | 7.24E-01 | 1.79E-01 | -0.39 | 1.40  |
| <i>lpg1809</i> | small ORF (130aa)                                                         | ORFs of unknown function (unique)                | 14.783 | 14.663 | 13.326 | 14.991 | 8.76E-01 | 3.83E-02 | -0.12 | 1.67  |
| <i>lpg1810</i> | long chain fatty acid transporter (fatty acid outer membrane porin)       | Transport and binding                            | 13.930 | 14.229 | 12.582 | 13.771 | 5.53E-01 | 1.95E-02 | 0.30  | 1.19  |
| <i>lpg1810</i> | long chain fatty acid transporter (fatty acid outer membrane porin)       | Transport and binding                            | 13.786 | 14.236 | 12.550 | 13.882 | 3.52E-01 | 1.36E-02 | 0.45  | 1.33  |
| <i>lpg1811</i> | aspartokinase (aspartate kinase, lysine sensitive)                        | <i>lysC</i> Amino Acid Metabolism                | 10.517 | 13.110 | 9.952  | 12.848 | 5.90E-03 | 3.10E-04 | 2.59  | 2.90  |
| <i>lpg1811</i> | aspartokinase (aspartate kinase, lysine sensitive)                        | <i>lysC</i> Amino Acid Metabolism                | 11.369 | 13.096 | 9.335  | 12.813 | 8.03E-05 | 1.05E-03 | 1.73  | 3.48  |
| <i>lpg1812</i> | ATP-dependent DNA helicase (UvrD/Rep helicase) (ATP dependent r           | Replication and Repair                           | 11.653 | 9.341  | 8.668  | 9.302  | 2.86E-04 | 4.95E-01 | -2.31 | 0.63  |
| <i>lpg1812</i> | ATP-dependent DNA helicase (UvrD/Rep helicase) (ATP dependent r           | Replication and Repair                           | 11.427 | 9.436  | 8.979  | 9.637  | 2.67E-03 | 3.36E-01 | -1.99 | 0.66  |
| <i>lpg1813</i> | ATPase (Mrp), MRP protein, ATP binding protein                            | <i>mrp</i> Named proteins of general function    | 10.844 | 11.646 | 11.779 | 12.151 | 2.04E-02 | 2.44E-01 | 0.80  | 0.37  |
| <i>lpg1813</i> | ATPase (Mrp), MRP protein, ATP binding protein                            | <i>mrp</i> Named proteins of general function    | 10.829 | 11.115 | 11.489 | 11.939 | 3.99E-01 | 5.37E-02 | 0.29  | 0.45  |
| <i>lpg1814</i> | hypothetical protein                                                      | Unknown / hypothetical proteins                  | 10.442 | 8.893  | 7.501  | 8.373  | 7.36E-02 | 5.84E-01 | -1.55 | 0.87  |
| <i>lpg1814</i> | hypothetical protein                                                      | Unknown / hypothetical proteins                  | 10.682 | 8.695  | 7.849  | 8.796  | 1.67E-01 | 5.16E-01 | -1.99 | 0.95  |
| <i>lpg1815</i> | hydrogen peroxide-inducible genes activator OxyR (oxid: oxyR              | Detoxification / adaptation, Transcription       | 9.740  | 8.954  | 8.724  | 8.619  | 1.49E-01 | 7.97E-01 | -0.79 | -1.10 |
| <i>lpg1815</i> | hydrogen peroxide-inducible genes activator OxyR (oxid: oxyR              | Detoxification / adaptation, Transcription       | 9.881  | 8.899  | 8.897  | 8.946  | 1.26E-02 | 9.30E-01 | -0.98 | 0.05  |
| <i>lpg1816</i> | major facilitator family transporter (multidrug efflux transporter, MFS f | Transport and binding                            | 10.343 | 8.249  | 10.600 | 9.256  | 3.85E-02 | 1.54E-02 | -2.09 | -1.34 |
| <i>lpg1816</i> | major facilitator family transporter (multidrug efflux transporter, MFS f | Transport and binding                            | 10.209 | 9.733  | 10.424 | 9.936  | 3.00E-01 | 2.87E-01 | -0.48 | -0.49 |
| <i>lpg1817</i> | ORF                                                                       | ORFs of unknown function (unique)                | 11.417 | 10.937 | 11.404 | 10.474 | 4.19E-01 | 2.03E-02 | -0.48 | -0.93 |
| <i>lpg1817</i> | ORF                                                                       | ORFs of unknown function (unique)                | 11.358 | 10.953 | 11.292 | 10.659 | 4.72E-01 | 3.85E-02 | -0.40 | -0.63 |
| <i>lpg1818</i> | tetraacyl disaccharide 4'-kinase                                          | Metabolism of Complex Carbohydrate:              | 10.168 | 9.238  | 9.494  | 8.586  | 7.71E-02 | 5.00E-02 | -0.93 | -0.91 |
| <i>lpg1818</i> | tetraacyl disaccharide 4'-kinase                                          | Metabolism of Complex Carbohydrate:              | 10.214 | 8.837  | 9.799  | 9.457  | 3.97E-02 | 5.05E-01 | -1.38 | -0.34 |
| <i>lpg1819</i> | ABC transporter, ATP binding/permease protein MsbA (multicopy sup         | Unknown / hypothetical proteins                  | 11.359 | 9.081  | 8.430  | 9.613  | 2.33E-04 | 2.33E-01 | -2.28 | 1.18  |
| <i>lpg1819</i> | ABC transporter, ATP binding/permease protein MsbA (multicopy sup         | Unknown / hypothetical proteins                  | 11.107 | 8.798  | 8.109  | 9.541  | 4.50E-03 | 1.31E-01 | -2.31 | 1.43  |
| <i>lpg1820</i> | ORF                                                                       | ORFs of unknown function (unique)                | 11.393 | 10.817 | 12.058 | 10.866 | 1.30E-01 | 5.55E-04 | -0.58 | -1.19 |
| <i>lpg1820</i> | ORF                                                                       | ORFs of unknown function (unique)                | 11.508 | 11.064 | 12.108 | 10.977 | 5.01E-02 | 5.35E-03 | -0.44 | -1.13 |
| <i>lpg1821</i> | dihydroorotate oxidase (dihydroorotate dehydrogenase)   <i>pyrD</i>       | Nucleotide Metabolism                            | 11.040 | 10.139 | 10.001 | 10.469 | 6.57E-03 | 2.47E-01 | -0.90 | 0.47  |
| <i>lpg1821</i> | dihydroorotate oxidase (dihydroorotate dehydrogenase)   <i>pyrD</i>       | Nucleotide Metabolism                            | 11.091 | 10.408 | 9.702  | 10.590 | 2.44E-02 | 7.59E-02 | -0.68 | 0.89  |
| <i>lpg1822</i> | ORF                                                                       | ORFs of unknown function (unique)                | 11.322 | 10.833 | 11.124 | 9.894  | 4.75E-01 | 2.78E-02 | -0.49 | -1.23 |
| <i>lpg1822</i> | ORF                                                                       | ORFs of unknown function (unique)                | 11.356 | 11.443 | 10.893 | 10.612 | 7.40E-01 | 5.52E-01 | 0.09  | -0.28 |
| <i>lpg1823</i> | conserved hypothetical protein                                            | Unknown / hypothetical proteins                  | 12.288 | 12.782 | 11.831 | 12.200 | 3.92E-01 | 5.16E-01 | 0.49  | 0.37  |
| <i>lpg1823</i> | conserved hypothetical protein                                            | Unknown / hypothetical proteins                  | 12.376 | 13.472 | 11.853 | 12.735 | 1.31E-03 | 8.01E-03 | 1.10  | 0.88  |
| <i>lpg1824</i> | acyl CoA dehydrogenase (isovaleryl CoA dehydrogenase)                     | Amino Acid Metabolism                            | 12.780 | 13.022 | 11.869 | 12.874 | 5.47E-01 | 2.32E-02 | 0.24  | 1.00  |
| <i>lpg1824</i> | acyl CoA dehydrogenase (isovaleryl CoA dehydrogenase)                     | Amino Acid Metabolism                            | 12.808 | 13.044 | 11.884 | 12.976 | 5.18E-01 | 1.46E-02 | 0.24  | 1.09  |
| <i>lpg1825</i> | acyl CoA C-acetyltransferase (acetoacetyl CoA thiolase) <i>atoB</i>       | Lipid Metabolism, Amino Acid Metabol             | 13.370 | 14.432 | 13.870 | 13.842 | 4.35E-05 | 8.52E-01 | 1.06  | -0.03 |
| <i>lpg1825</i> | acyl CoA C-acetyltransferase (acetoacetyl CoA thiolase) <i>atoB</i>       | Lipid Metabolism, Amino Acid Metabol             | 13.468 | 14.459 | 13.895 | 13.910 | 3.62E-05 | 8.98E-01 | 0.99  | 0.02  |
| <i>lpg1826</i> | hypothetical                                                              | Unknown / hypothetical proteins                  | 13.051 | 12.761 | 12.082 | 12.954 | 4.46E-01 | 1.03E-02 | -0.29 | 0.87  |
| <i>lpg1826</i> | hypothetical                                                              | Unknown / hypothetical proteins                  | 13.022 | 12.926 | 12.041 | 13.059 | 6.40E-01 | 1.80E-03 | -0.10 | 1.02  |
| <i>lpg1827</i> | propionyl CoA carboxylase beta subunit (3-methylcrotonyl CoA carbo        | Amino Acid Metabolism, Carbohydrate              | 11.300 | 11.274 | 11.759 | 11.478 | 9.64E-01 | 1.33E-01 | -0.03 | -0.28 |
| <i>lpg1827</i> | propionyl CoA carboxylase beta subunit (3-methylcrotonyl CoA carbo        | Amino Acid Metabolism, Carbohydrate              | 11.259 | 11.255 | 11.674 | 11.397 | 9.94E-01 | 2.55E-01 | 0.00  | -0.28 |
| <i>lpg1828</i> | enoyl CoA hydratase/isomerase (crotonase)                                 | Lipid Metabolism, Amino Acid Metabol             | 12.050 | 12.524 | 11.509 | 12.485 | 1.64E-01 | 3.88E-03 | 0.47  | 0.98  |
| <i>lpg1828</i> | enoyl CoA hydratase/isomerase (crotonase)                                 | Lipid Metabolism, Amino Acid Metabol             | 12.016 | 12.456 | 11.466 | 12.567 | 1.97E-01 | 3.93E-03 | 0.44  | 1.10  |
| <i>lpg1829</i> | acyl CoA carboxylase subunit alpha subunit (3-methylcrotonyl-CoA ce       | Lipid Metabolism                                 | 11.494 | 11.886 | 10.641 | 11.462 | 5.47E-01 | 2.54E-01 | 0.39  | 0.82  |
| <i>lpg1829</i> | acyl CoA carboxylase subunit alpha subunit (3-methylcrotonyl-CoA ce       | Lipid Metabolism                                 | 11.173 | 11.582 | 10.185 | 11.385 | 3.74E-01 | 7.01E-02 | 0.41  | 1.20  |
| <i>lpg1830</i> | hydroxymethylglutaryl-CoA lyase (3-hydroxy-3-methylglu <i>mvaB</i>        | Lipid Metabolism, Amino Acid Metabol             | 11.108 | 10.048 | 10.748 | 10.126 | 1.53E-02 | 1.10E-01 | -1.06 | -0.62 |
| <i>lpg1830</i> | hydroxymethylglutaryl-CoA lyase (3-hydroxy-3-methylglu <i>mvaB</i>        | Lipid Metabolism, Amino Acid Metabol             | 11.223 | 10.215 | 10.382 | 10.015 | 5.19E-03 | 5.66E-01 | -1.01 | -0.37 |
| <i>lpg1831</i> | acetoacetyl CoA synthetase                                                | Carbohydrate Metabolism                          | 11.698 | 11.906 | 13.444 | 11.308 | 5.99E-01 | 3.69E-02 | 0.21  | -2.14 |
| <i>lpg1831</i> | acetoacetyl CoA synthetase                                                | Carbohydrate Metabolism                          | 11.649 | 11.605 | 13.460 | 11.606 | 9.47E-01 | 2.80E-02 | -0.04 | -1.85 |
| <i>lpg1832</i> | small ORF (138aa) (similar to putative VirA/G regulated VirK gene of      | Toxin production / other pathogen func           | 12.236 | 11.144 | 10.068 | 10.547 | 1.31E-01 | 5.24E-01 | -1.09 | 0.48  |
| <i>lpg1832</i> | small ORF (138aa) (similar to putative VirA/G regulated VirK gene of      | Toxin production / other pathogen func           | 12.294 | 11.215 | 10.066 | 10.730 | 1.20E-01 | 3.89E-01 | -1.08 | 0.66  |
| <i>lpg1833</i> | D-methionine transport ATP binding protein MetN (ABC ti <i>metN</i>       | Transport and binding                            | 9.959  | 9.618  | 9.312  | 9.391  | 3.94E-01 | 8.85E-01 | -0.34 | 0.08  |
| <i>lpg1833</i> | D-methionine transport ATP binding protein MetN (ABC ti <i>metN</i>       | Transport and binding                            | 9.766  | 9.498  | 8.722  | 9.756  | 5.24E-01 | 9.09E-02 | -0.27 | 1.03  |
| <i>lpg1834</i> | ATP binding protein, permease protein (D-methionine tra <i>metI</i>       | Transport and binding                            | 10.672 | 10.846 | 10.028 | 10.431 | 6.47E-01 | 2.32E-01 | 0.17  | 0.40  |
| <i>lpg1834</i> | ATP binding protein, permease protein (D-methionine tra <i>metI</i>       | Transport and binding                            | 10.498 | 10.715 | 9.960  | 10.462 | 5.50E-01 | 1.18E-01 | 0.22  | 0.50  |

|                |                                                                      |              |        |        |        |        |          |          |       |       |
|----------------|----------------------------------------------------------------------|--------------|--------|--------|--------|--------|----------|----------|-------|-------|
| <i>lpg1835</i> | 29 kDa immunogenic protein (L. pneumophila), lipoprotein (ABC trans  |              | 12.453 | 13.167 | 11.739 | 12.300 | 4.33E-02 | 1.47E-02 | 0.71  | 0.56  |
| <i>lpg1835</i> | 29 kDa immunogenic protein (L. pneumophila), lipoprotein (ABC trans  |              | 12.470 | 13.219 | 11.793 | 12.377 | 1.59E-02 | 6.34E-03 | 0.75  | 0.58  |
| <i>lpg1836</i> | coiled coil domain protein                                           | <i>ceg25</i> | 10.248 | 12.105 | 11.102 | 11.697 | 8.03E-04 | 1.32E-01 | 1.86  | 0.59  |
| <i>lpg1836</i> | coiled coil domain protein                                           | <i>ceg25</i> | 9.905  | 12.115 | 11.020 | 11.736 | 9.61E-06 | 1.10E-01 | 2.21  | 0.72  |
| <i>lpg1837</i> | SAM-dependent methyltransferase                                      |              | 11.242 | 10.049 | 10.826 | 10.679 | 2.36E-03 | 6.25E-01 | -1.19 | -0.15 |
| <i>lpg1837</i> | SAM-dependent methyltransferase                                      |              | 11.388 | 10.229 | 11.053 | 10.957 | 3.72E-04 | 4.99E-01 | -1.16 | -0.10 |
| <i>lpg1838</i> | histidinol phosphate phosphatase (histidinol phosphatase)            |              | 10.629 | 10.142 | 8.793  | 10.958 | 3.28E-01 | 1.02E-01 | -0.49 | 2.16  |
| <i>lpg1838</i> | histidinol phosphate phosphatase (histidinol phosphatase)            |              | 10.704 | 9.737  | 9.059  | 11.488 | 2.69E-01 | 1.32E-02 | -0.97 | 2.43  |
| <i>lpg1839</i> | glycyl tRNA synthetase, beta subunit                                 | <i>glyS</i>  | 11.398 | 10.035 | 9.731  | 11.484 | 2.23E-04 | 1.14E-02 | -1.36 | 1.75  |
| <i>lpg1839</i> | glycyl tRNA synthetase, beta subunit                                 | <i>glyS</i>  | 10.967 | 9.963  | 9.059  | 11.606 | 6.47E-02 | 1.43E-03 | -1.00 | 2.55  |
| <i>lpg1840</i> | glycyl tRNA synthetase, alpha subunit                                | <i>glyQ</i>  | 12.594 | 11.505 | 10.724 | 12.731 | 1.14E-01 | 6.00E-03 | -1.09 | 2.01  |
| <i>lpg1840</i> | glycyl tRNA synthetase, alpha subunit                                | <i>glyQ</i>  | 11.989 | 11.612 | 10.271 | 12.726 | 7.21E-01 | 3.52E-03 | -0.28 | 2.46  |
| <i>lpg1841</i> | 27 kDa outer membrane protein                                        | <i>com1</i>  | 14.291 | 13.285 | 12.810 | 12.941 | 4.31E-01 | 8.98E-01 | -1.01 | 0.13  |
| <i>lpg1841</i> | 27 kDa outer membrane protein                                        | <i>com1</i>  | 14.414 | 13.778 | 12.847 | 13.448 | 3.49E-01 | 2.92E-01 | -0.64 | 0.60  |
| <i>lpg1842</i> | DNA dependent ATPase I and helicase II (DNA helicase I <i>uvrD</i>   |              | 10.749 | 10.259 | 11.160 | 10.551 | 3.90E-02 | 1.14E-02 | -0.49 | -0.61 |
| <i>lpg1842</i> | DNA dependent ATPase I and helicase II (DNA helicase I <i>uvrD</i>   |              | 10.793 | 10.326 | 11.161 | 10.705 | 3.19E-01 | 3.70E-02 | -0.47 | -0.46 |
| <i>lpg1843</i> | proline iminopeptidase (prolyl aminopeptidase)                       | <i>pip</i>   | 11.074 | 11.923 | 9.436  | 11.400 | 1.58E-01 | 1.99E-02 | 0.85  | 1.96  |
| <i>lpg1843</i> | proline iminopeptidase (prolyl aminopeptidase)                       | <i>pip</i>   | 11.051 | 11.062 | 9.059  | 11.168 | 9.93E-01 | 2.44E-02 | 0.01  | 2.11  |
| <i>lpg1844</i> | D-tyrosyl-tRNA (Tyr) deacylase                                       | <i>dtD</i>   | 10.794 | 10.108 | 9.080  | 10.124 | 3.17E-01 | 1.04E-01 | -0.69 | 1.04  |
| <i>lpg1844</i> | D-tyrosyl-tRNA (Tyr) deacylase                                       | <i>dtD</i>   | 11.255 | 11.266 | 9.254  | 10.945 | 9.90E-01 | 1.95E-01 | 0.01  | 1.69  |
| <i>lpg1845</i> | lipoprotein VacJ, peptidoglycan stabilization, virulence fac         | <i>vacJ</i>  | 12.078 | 11.636 | 9.469  | 11.307 | 3.32E-01 | 2.13E-03 | -0.44 | 1.84  |
| <i>lpg1845</i> | lipoprotein VacJ, peptidoglycan stabilization, virulence fac         | <i>vacJ</i>  | 11.915 | 11.644 | 9.254  | 11.327 | 6.08E-01 | 2.17E-03 | -0.27 | 2.07  |
| <i>lpg1846</i> | glutathione synthetase                                               | <i>gshB</i>  | 10.116 | 7.743  | 8.745  | 9.377  | 6.20E-02 | 1.37E-01 | -2.37 | 0.63  |
| <i>lpg1846</i> | glutathione synthetase                                               | <i>gshB</i>  | 10.242 | 8.777  | 9.123  | 10.116 | 1.30E-01 | 8.63E-02 | -1.47 | 0.99  |
| <i>lpg1847</i> | glutamate-cysteine ligase                                            |              | 11.508 | 10.968 | 11.933 | 11.436 | 3.55E-01 | 4.71E-01 | -0.54 | -0.50 |
| <i>lpg1847</i> | glutamate-cysteine ligase                                            |              | 11.339 | 11.442 | 12.056 | 11.726 | 7.24E-01 | 1.23E-01 | 0.10  | -0.33 |
| <i>lpg1848</i> | ABC transporter, transmembrane permease?                             |              | 10.562 | 9.938  | 9.451  | 9.893  | 1.15E-01 | 3.27E-01 | -0.62 | 0.44  |
| <i>lpg1848</i> | ABC transporter, transmembrane permease?                             |              | 10.537 | 10.160 | 9.545  | 10.338 | 3.74E-01 | 9.63E-02 | -0.38 | 0.79  |
| <i>lpg1849</i> | small ORF (93aa)?                                                    |              | 12.000 | 11.804 | 11.047 | 10.840 | 6.30E-01 | 6.22E-01 | -0.20 | -0.21 |
| <i>lpg1849</i> | small ORF (93aa)?                                                    |              | 12.209 | 11.726 | 11.123 | 10.933 | 5.51E-02 | 6.67E-01 | -0.48 | -0.19 |
| <i>lpg1850</i> | rhodanese domain protein (dinucleotide utilizing enzymes involved in |              | 11.338 | 10.697 | 11.328 | 10.148 | 1.60E-02 | 1.66E-04 | -0.64 | -1.18 |
| <i>lpg1850</i> | rhodanese domain protein (dinucleotide utilizing enzymes involved in |              | 11.271 | 10.771 | 11.261 | 10.612 | 2.33E-01 | 9.27E-03 | -0.50 | -0.65 |
| <i>lpg1851</i> | ORF                                                                  |              | 13.656 | 15.486 | 13.839 | 12.489 | 4.94E-05 | 2.31E-06 | 1.83  | -1.35 |
| <i>lpg1851</i> | ORF                                                                  |              | 13.615 | 15.400 | 13.827 | 12.542 | 1.01E-04 | 7.25E-07 | 1.78  | -1.29 |
| <i>lpg1852</i> | alkaline phosphatase (alkaline phosphomonoesterase) (Ca2+ ATPase     |              | 10.119 | 11.052 | 9.073  | 12.495 | 6.76E-02 | 3.35E-04 | 0.93  | 3.42  |
| <i>lpg1852</i> | alkaline phosphatase (alkaline phosphomonoesterase) (Ca2+ ATPase     |              | 9.946  | 11.389 | 8.960  | 13.032 | 1.76E-02 | 7.26E-05 | 1.44  | 4.07  |
| <i>lpg1853</i> | uridine kinase (uridine/cytidine kinase)                             | <i>udk</i>   | 11.576 | 11.040 | 8.730  | 12.250 | 3.87E-01 | 1.34E-03 | -0.54 | 3.52  |
| <i>lpg1853</i> | uridine kinase (uridine/cytidine kinase)                             | <i>udk</i>   | 11.740 | 11.817 | 7.705  | 12.247 | 9.25E-01 | 1.28E-02 | 0.08  | 4.54  |
| <i>lpg1854</i> | enoyl reductase (NADH dependent enoyl ACP reductase <i>fabI</i>      |              | 10.976 | 10.176 | 9.646  | 10.021 | 1.37E-01 | 5.44E-01 | -0.80 | 0.37  |
| <i>lpg1854</i> | enoyl reductase (NADH dependent enoyl ACP reductase <i>fabI</i>      |              | 10.042 | 10.313 | 9.458  | 10.116 | 8.32E-01 | 2.55E-01 | 0.27  | 0.66  |
| <i>lpg1855</i> | peptidyl prolyl cis-trans isomerase D                                | <i>ppiD</i>  | 10.148 | 8.966  | 8.891  | 9.537  | 8.85E-02 | 4.07E-01 | -1.18 | 0.65  |
| <i>lpg1855</i> | peptidyl prolyl cis-trans isomerase D                                | <i>ppiD</i>  | 10.321 | 9.407  | 8.227  | 9.481  | 1.51E-01 | 2.28E-01 | -0.91 | 1.25  |
| <i>lpg1856</i> | tRNA-Asp                                                             |              | 12.525 | 14.223 | 12.378 | 13.782 | 1.64E-04 | 5.01E-03 | 1.70  | 1.40  |
| <i>lpg1856</i> | tRNA-Asp                                                             |              | 12.562 | 14.346 | 12.338 | 13.963 | 6.24E-05 | 2.35E-03 | 1.78  | 1.63  |
| <i>lpg1857</i> | tRNA-Val                                                             |              | 10.861 | 12.391 | 11.149 | 11.213 | 1.73E-03 | 9.53E-01 | 1.53  | 0.06  |
| <i>lpg1857</i> | tRNA-Val                                                             |              | 10.923 | 12.429 | 10.923 | 12.115 | 1.22E-03 | 7.75E-02 | 1.51  | 1.19  |
| <i>lpg1858</i> | HupB DNA binding protein HU-beta (HU-1)/bending (bac                 | <i>hupB</i>  | 15.265 | 15.525 | 15.042 | 15.112 | 3.18E-01 | 6.55E-01 | 0.26  | 0.07  |
| <i>lpg1858</i> | HupB DNA binding protein HU-beta (HU-1)/bending (bac                 | <i>hupB</i>  | 15.065 | 15.632 | 14.914 | 15.081 | 4.92E-02 | 2.62E-01 | 0.57  | 0.17  |
| <i>lpg1859</i> | ATP-dependent protease La                                            | <i>lon</i>   | 12.210 | 11.852 | 12.196 | 11.514 | 4.24E-01 | 2.05E-02 | -0.36 | -0.68 |
| <i>lpg1859</i> | ATP-dependent protease La                                            | <i>lon</i>   | 12.350 | 11.746 | 12.197 | 11.782 | 2.80E-01 | 1.18E-01 | -0.60 | -0.42 |
| <i>lpg1860</i> | ATP-dependent Clp protease, ATP binding subunit ClpX                 | <i>clpX</i>  | 12.522 | 11.900 | 11.066 | 11.898 | 6.33E-02 | 1.14E-01 | -0.62 | 0.83  |
| <i>lpg1860</i> | ATP-dependent Clp protease, ATP binding subunit ClpX                 | <i>clpX</i>  | 12.198 | 12.561 | 11.078 | 12.561 | 5.60E-01 | 4.72E-02 | 0.36  | 1.48  |
| <i>lpg1861</i> | ATP-dependent Clp protease, proteolytic subunit ClpP                 | <i>clpP</i>  | 14.377 | 13.743 | 13.123 | 14.818 | 6.54E-02 | 1.48E-04 | -0.63 | 1.69  |
| <i>lpg1861</i> | ATP-dependent Clp protease, proteolytic subunit ClpP                 | <i>clpP</i>  | 14.633 | 13.971 | 13.143 | 14.843 | 1.10E-01 | 1.29E-04 | -0.66 | 1.70  |
| <i>lpg1862</i> | trigger factor TF (FKBP-type peptidyl prolyl cis-trans isom          | <i>tig</i>   | 13.682 | 13.141 | 12.259 | 14.428 | 3.21E-01 | 2.89E-04 | -0.54 | 2.17  |
| <i>lpg1862</i> | trigger factor TF (FKBP-type peptidyl prolyl cis-trans isom          | <i>tig</i>   | 13.552 | 13.139 | 12.226 | 14.429 | 4.05E-01 | 2.49E-04 | -0.41 | 2.20  |
| <i>lpg1863</i> | tRNA-Leu                                                             |              | 12.394 | 12.774 | 11.957 | 13.413 | 3.57E-01 | 3.15E-03 | 0.38  | 1.46  |
| <i>lpg1863</i> | tRNA-Leu                                                             |              | 12.313 | 12.564 | 11.550 | 13.433 | 6.00E-01 | 3.86E-03 | 0.25  | 1.88  |
| <i>lpg1864</i> | tRNA-His                                                             |              | 12.389 | 11.254 | 11.763 | 12.833 | 1.41E-01 | 2.26E-01 | -1.13 | 1.07  |
| <i>lpg1864</i> | tRNA-His                                                             |              | 12.565 | 11.467 | 11.818 | 13.262 | 5.18E-02 | 9.72E-03 | -1.10 | 1.44  |
| <i>lpg1865</i> | tRNA-Arg                                                             |              | 11.770 | 8.887  | 10.085 | 9.966  | 9.44E-04 | 8.82E-01 | -2.88 | -0.12 |
| <i>lpg1865</i> | tRNA-Arg                                                             |              | 11.429 | 9.359  | 9.947  | 10.466 | 1.77E-03 | 4.75E-01 | -2.07 | 0.52  |
| <i>lpg1866</i> | tRNA-Pro                                                             |              | 10.623 | 9.677  | 9.957  | 10.698 | 4.80E-01 | 1.97E-01 | -0.95 | 0.74  |
| <i>lpg1866</i> | tRNA-Pro                                                             |              | 11.177 | 10.302 | 9.827  | 10.989 | 8.91E-02 | 4.87E-02 | -0.88 | 1.16  |

|                |                                                                                       |                     |                                          |        |        |        |        |          |          |       |       |
|----------------|---------------------------------------------------------------------------------------|---------------------|------------------------------------------|--------|--------|--------|--------|----------|----------|-------|-------|
| <i>lpg1867</i> | site specific recombinase, phage integrase                                            |                     | Viral functions / Phage / Transposases   | 10.518 | 10.483 | 9.437  | 10.605 | 9.00E-01 | 3.66E-04 | -0.04 | 1.17  |
| <i>lpg1867</i> | site specific recombinase, phage integrase                                            |                     | Viral functions / Phage / Transposases   | 10.131 | 10.632 | 8.948  | 10.563 | 1.02E-01 | 7.62E-04 | 0.50  | 1.61  |
| <i>lpg1868</i> | ABC transporter, ATP-binding component (ATPase component of ABC Transport and binding |                     | Transport and binding                    | 9.221  | 8.353  | 8.765  | 8.763  | 4.89E-02 | 9.96E-01 | -0.87 | 0.00  |
| <i>lpg1868</i> | ABC transporter, ATP-binding component (ATPase component of ABC Transport and binding |                     | Transport and binding                    | 9.553  | 8.935  | 8.959  | 9.232  | 3.70E-01 | 6.95E-01 | -0.62 | 0.27  |
| <i>lpg1869</i> | ribonuclease III (dsRNA-specific ribonuclease) (RNAse II <i>rmc</i>                   |                     | DNA/RNA degradation / restriction        | 12.688 | 9.859  | 11.050 | 10.585 | 2.17E-04 | 2.91E-01 | -2.83 | -0.46 |
| <i>lpg1869</i> | ribonuclease III (dsRNA-specific ribonuclease) (RNAse II <i>rmc</i>                   |                     | DNA/RNA degradation / restriction        | 12.500 | 10.044 | 10.985 | 10.633 | 1.54E-03 | 3.96E-01 | -2.46 | -0.35 |
| <i>lpg1870</i> | transmembrane protein (fimbrial? pilin?)                                              |                     | Named proteins of general function       | 12.856 | 12.583 | 13.016 | 12.179 | 1.94E-01 | 4.08E-03 | -0.27 | -0.84 |
| <i>lpg1870</i> | transmembrane protein (fimbrial? pilin?)                                              |                     | Named proteins of general function       | 12.848 | 12.636 | 12.979 | 12.213 | 3.06E-01 | 7.51E-03 | -0.21 | -0.77 |
| <i>lpg1871</i> | signal peptidase I (lepB-1)                                                           | <i>lepB-1</i>       | Protein fate / hydrolases / secretion    | 11.337 | 11.563 | 11.458 | 12.017 | 4.04E-01 | 9.28E-02 | 0.23  | 0.56  |
| <i>lpg1871</i> | signal peptidase I (lepB-1)                                                           | <i>lepB-1</i>       | Protein fate / hydrolases / secretion    | 11.290 | 11.904 | 11.205 | 12.038 | 1.86E-01 | 4.26E-02 | 0.61  | 0.83  |
| <i>lpg1872</i> | GTP binding elongation factor LepA                                                    | <i>lepA</i>         | Toxin production / other pathogen func   | 12.485 | 12.130 | 11.286 | 12.555 | 5.07E-01 | 1.19E-02 | -0.35 | 1.27  |
| <i>lpg1872</i> | GTP binding elongation factor LepA                                                    | <i>lepA</i>         | Toxin production / other pathogen func   | 12.464 | 12.081 | 11.151 | 12.592 | 4.19E-01 | 6.45E-03 | -0.38 | 1.44  |
| <i>lpg1873</i> | membrane bound lytic murein transglycosylase (peptidoglycan N-ace                     |                     | Metabolism of Complex Carbohydrate:      | 9.823  | 10.049 | 8.878  | 10.318 | 6.86E-01 | 1.98E-02 | 0.23  | 1.44  |
| <i>lpg1873</i> | membrane bound lytic murein transglycosylase (peptidoglycan N-ace                     |                     | Metabolism of Complex Carbohydrate:      | 9.706  | 10.112 | 8.778  | 10.239 | 5.53E-01 | 2.63E-01 | 0.41  | 1.46  |
| <i>lpg1874</i> | general secretion pathway protein L                                                   |                     | Protein fate / hydrolases / secretion    | 11.436 | 9.866  | 9.464  | 9.326  | 6.64E-05 | 7.42E-01 | -1.57 | -0.14 |
| <i>lpg1874</i> | general secretion pathway protein L                                                   |                     | Protein fate / hydrolases / secretion    | 10.844 | 10.214 | 9.081  | 9.484  | 3.27E-01 | 4.90E-01 | -0.63 | 0.40  |
| <i>lpg1875</i> | putative general secretion pathway protein M-type yghD                                | <i>yghD</i>         | Protein fate / hydrolases / secretion    | 9.304  | 8.522  | 9.441  | 8.235  | 1.17E-01 | 4.15E-02 | -0.78 | -1.21 |
| <i>lpg1875</i> | putative general secretion pathway protein M-type yghD                                | <i>yghD</i>         | Protein fate / hydrolases / secretion    | 9.552  | 9.106  | 9.501  | 8.678  | 1.19E-01 | 3.83E-02 | -0.45 | -0.82 |
| <i>lpg1876</i> | ORF                                                                                   |                     | ORFs of unknown function (unique)        | 9.549  | 8.730  | 13.857 | 8.203  | 5.26E-01 | 1.57E-05 | -0.82 | -5.65 |
| <i>lpg1876</i> | ORF                                                                                   |                     | ORFs of unknown function (unique)        | 9.843  | 9.835  | 12.741 | 7.935  | 9.94E-01 | 5.63E-03 | -0.01 | -4.81 |
| <i>lpg1877</i> | deoxyguanosinetriphosphate (dGTP) triphosphohydrolase                                 |                     | Signal transduction / other regulatory f | 10.494 | 10.817 | 10.135 | 10.804 | 5.86E-01 | 8.42E-02 | 0.32  | 0.67  |
| <i>lpg1877</i> | deoxyguanosinetriphosphate (dGTP) triphosphohydrolase                                 |                     | Signal transduction / other regulatory f | 10.393 | 11.608 | 9.747  | 10.865 | 1.82E-02 | 5.32E-03 | 1.22  | 1.12  |
| <i>lpg1878</i> | tRNA-Glu                                                                              |                     | tRNA                                     | 11.287 | 10.466 | 10.099 | 10.772 | 2.86E-01 | 4.92E-01 | -0.82 | 0.67  |
| <i>lpg1878</i> | tRNA-Glu                                                                              |                     | tRNA                                     | 11.046 | 10.894 | 10.165 | 10.987 | 8.73E-01 | 4.28E-01 | -0.15 | 0.82  |
| <i>lpg1880</i> | tRNA-Ala                                                                              |                     | tRNA                                     | 10.576 | 11.009 | 10.610 | 11.397 | 2.23E-01 | 1.07E-01 | 0.43  | 0.79  |
| <i>lpg1880</i> | tRNA-Ala                                                                              |                     | tRNA                                     | 10.278 | 10.737 | 10.322 | 11.239 | 4.17E-01 | 1.39E-01 | 0.46  | 0.92  |
| <i>lpg1881</i> | ORF                                                                                   |                     | ORFs of unknown function (unique)        | 10.066 | 10.586 | 10.291 | 10.107 | 9.01E-02 | 4.65E-01 | 0.52  | -0.18 |
| <i>lpg1881</i> | ORF                                                                                   |                     | ORFs of unknown function (unique)        | 10.259 | 10.569 | 10.065 | 10.514 | 4.05E-01 | 9.23E-02 | 0.31  | 0.45  |
| <i>lpg1882</i> | lactoylglutathione lyase                                                              | <i>gloA</i>         | Carbohydrate Metabolism                  | 10.812 | 12.605 | 11.409 | 11.875 | 1.46E-03 | 4.56E-01 | 1.79  | 0.47  |
| <i>lpg1882</i> | lactoylglutathione lyase                                                              | <i>gloA</i>         | Carbohydrate Metabolism                  | 10.772 | 12.247 | 11.233 | 11.772 | 1.04E-04 | 2.30E-01 | 1.48  | 0.54  |
| <i>lpg1883</i> | transmembrane protein                                                                 |                     | Unknown / hypothetical proteins          | 12.037 | 12.262 | 11.179 | 11.517 | 4.69E-01 | 5.06E-01 | 0.22  | 0.34  |
| <i>lpg1883</i> | transmembrane protein                                                                 |                     | Unknown / hypothetical proteins          | 11.990 | 11.906 | 11.140 | 11.656 | 7.47E-01 | 1.46E-01 | -0.08 | 0.52  |
| <i>lpg1884</i> | Microtubule binding protein, putative                                                 | <i>legC2 / YifE</i> | Named proteins of general function       | 10.121 | 8.549  | 10.658 | 8.460  | 5.37E-02 | 1.46E-03 | -1.57 | -2.20 |
| <i>lpg1884</i> | Microtubule binding protein, putative                                                 | <i>legC2 / YifE</i> | Named proteins of general function       | 10.154 | 8.974  | 10.376 | 8.658  | 4.77E-02 | 9.87E-03 | -1.18 | -1.72 |
| <i>lpg1885</i> | small ORF (104aa)                                                                     |                     | ORFs of unknown function (unique)        | 9.763  | 10.966 | 12.211 | 10.200 | 1.44E-01 | 5.67E-02 | 1.20  | -2.01 |
| <i>lpg1885</i> | small ORF (104aa)                                                                     |                     | ORFs of unknown function (unique)        | 9.914  | 11.037 | 12.199 | 10.197 | 1.69E-01 | 6.94E-02 | 1.12  | -2.00 |
| <i>lpg1886</i> | acylphosphatase                                                                       |                     | Named proteins of general function       | 10.531 | 10.440 | 11.265 | 10.084 | 7.03E-01 | 2.83E-02 | -0.09 | -1.18 |
| <i>lpg1886</i> | acylphosphatase                                                                       |                     | Named proteins of general function       | 10.723 | 10.804 | 11.468 | 10.453 | 8.74E-01 | 9.90E-02 | 0.08  | -1.02 |
| <i>lpg1887</i> | ORF                                                                                   |                     | ORFs of unknown function (unique)        | 11.732 | 12.313 | 14.454 | 11.359 | 3.83E-01 | 2.61E-03 | 0.58  | -3.10 |
| <i>lpg1887</i> | ORF                                                                                   |                     | ORFs of unknown function (unique)        | 11.809 | 12.293 | 14.418 | 11.504 | 4.52E-01 | 3.21E-03 | 0.48  | -2.91 |
| <i>lpg1888</i> | ORF                                                                                   |                     | ORFs of unknown function (unique)        | 10.324 | 9.880  | 10.392 | 9.879  | 4.81E-01 | 3.45E-01 | -0.44 | -0.51 |
| <i>lpg1888</i> | ORF                                                                                   |                     | ORFs of unknown function (unique)        | 10.222 | 10.083 | 10.310 | 9.867  | 7.72E-01 | 4.22E-01 | -0.14 | -0.44 |
| <i>lpg1889</i> | lipase (triacylglycerol lipase)                                                       |                     | Protein fate / hydrolases / secretion    | 11.433 | 11.247 | 14.692 | 10.688 | 8.24E-01 | 1.13E-03 | -0.19 | -4.00 |
| <i>lpg1889</i> | lipase (triacylglycerol lipase)                                                       |                     | Protein fate / hydrolases / secretion    | 11.353 | 11.600 | 14.565 | 10.982 | 7.56E-01 | 1.64E-03 | 0.25  | -3.58 |
| <i>lpg1890</i> | galA protein 1                                                                        | <i>legLC8</i>       | Named proteins of general function       | 9.819  | 12.938 | 10.270 | 10.511 | 8.98E-03 | 6.99E-01 | 3.12  | 0.24  |
| <i>lpg1890</i> | galA protein 1                                                                        | <i>legLC8</i>       | Named proteins of general function       | 9.843  | 13.295 | 10.447 | 10.892 | 8.89E-04 | 4.80E-01 | 3.45  | 0.45  |
| <i>lpg1891</i> | hypothetical protein HI1736                                                           |                     | Unknown / hypothetical proteins          | 11.626 | 11.499 | 11.758 | 9.622  | 7.35E-01 | 6.48E-06 | -0.13 | -2.14 |
| <i>lpg1891</i> | hypothetical protein HI1736                                                           |                     | Unknown / hypothetical proteins          | 11.677 | 11.627 | 11.834 | 9.763  | 8.77E-01 | 6.36E-03 | -0.05 | -2.07 |
| <i>lpg1892</i> | small ORF (127aa)                                                                     |                     | ORFs of unknown function (unique)        | 9.797  | 10.628 | 8.680  | 9.472  | 5.51E-02 | 1.92E-01 | 0.83  | 0.79  |
| <i>lpg1892</i> | small ORF (127aa)                                                                     |                     | ORFs of unknown function (unique)        | 10.081 | 10.458 | 8.446  | 9.611  | 2.01E-01 | 2.77E-01 | 0.38  | 1.17  |
| <i>lpg1893</i> | major facilitator family transporter (multidrug efflux transporter MFS fa             |                     | Transport and binding                    | 9.506  | 9.382  | 8.751  | 10.964 | 7.90E-01 | 1.32E-05 | -0.12 | 2.21  |
| <i>lpg1893</i> | major facilitator family transporter (multidrug efflux transporter MFS fa             |                     | Transport and binding                    | 9.149  | 9.645  | 8.430  | 10.991 | 2.29E-01 | 2.19E-04 | 0.50  | 2.56  |
| <i>lpg1894</i> | chloride channel protein (voltage gated?)                                             |                     | Transport and binding                    | 9.887  | 7.983  | 9.564  | 9.207  | 7.52E-02 | 3.54E-01 | -1.90 | -0.36 |
| <i>lpg1894</i> | chloride channel protein (voltage gated?)                                             |                     | Transport and binding                    | 9.663  | 7.754  | 9.056  | 8.963  | 1.32E-01 | 8.52E-01 | -1.91 | -0.09 |
| <i>lpg1895</i> | ORF                                                                                   |                     | ORFs of unknown function (unique)        | 10.607 | 10.076 | 14.094 | 8.894  | 4.84E-01 | 2.27E-02 | -0.53 | -5.20 |
| <i>lpg1895</i> | ORF                                                                                   |                     | ORFs of unknown function (unique)        | 10.574 | 10.417 | 13.917 | 10.017 | 8.20E-01 | 1.36E-02 | -0.16 | -3.90 |
| <i>lpg1896</i> | COG3012: conserved protein (SEC-C motif domain prote <i>ychJ</i>                      |                     | Named proteins of general function       | 9.107  | 9.252  | 8.390  | 9.757  | 7.43E-01 | 5.83E-03 | 0.15  | 1.37  |
| <i>lpg1896</i> | COG3012: conserved protein (SEC-C motif domain prote <i>ychJ</i>                      |                     | Named proteins of general function       | 8.842  | 9.185  | 6.376  | 9.286  | 5.34E-01 | 6.42E-03 | 0.34  | 2.91  |
| <i>lpg1897</i> | glutathione-regulated potassium efflux system                                         |                     | Transport and binding                    | 10.892 | 9.190  | 10.287 | 10.423 | 6.66E-02 | 6.63E-01 | -1.70 | 0.14  |
| <i>lpg1897</i> | glutathione-regulated potassium efflux system                                         |                     | Transport and binding                    | 10.698 | 9.550  | 9.755  | 10.510 | 1.03E-01 | 6.18E-02 | -1.15 | 0.75  |
| <i>lpg1898</i> | methanol dehydrogenase regulatory protein (MoxR protein)                              |                     | Transcription factors / DNA binding prc  | 9.688  | 8.920  | 11.950 | 8.223  | 4.04E-01 | 5.22E-03 | -0.77 | -3.73 |
| <i>lpg1898</i> | methanol dehydrogenase regulatory protein (MoxR protein)                              |                     | Transcription factors / DNA binding prc  | 10.119 | 8.903  | 12.017 | 9.025  | 1.50E-01 | 4.22E-03 | -1.22 | -2.99 |
| <i>lpg1899</i> | transmembrane protein                                                                 |                     | Unknown / hypothetical proteins          | 9.250  | 8.758  | 11.064 | 8.038  | 6.15E-01 | 1.46E-03 | -0.49 | -3.03 |
| <i>lpg1899</i> | transmembrane protein                                                                 |                     | Unknown / hypothetical proteins          | 9.326  | 7.696  | 10.975 | 8.286  | 1.58E-01 | 4.78E-03 | -1.63 | -2.69 |

|                |                                                                        |             |                                          |        |        |        |        |          |          |       |       |
|----------------|------------------------------------------------------------------------|-------------|------------------------------------------|--------|--------|--------|--------|----------|----------|-------|-------|
| <i>lpg1900</i> | transglutaminase domain protein                                        |             | Named proteins of general function       | 9.088  | 8.681  | 10.913 | 9.139  | 6.05E-01 | 2.49E-02 | -0.41 | -1.77 |
| <i>lpg1900</i> | transglutaminase domain protein                                        |             | Named proteins of general function       | 8.397  | 9.384  | 10.733 | 9.403  | 2.56E-01 | 5.50E-02 | 0.99  | -1.33 |
| <i>lpg1901</i> | conserved hypothetical protein                                         |             | Unknown / hypothetical proteins          | 9.146  | 10.269 | 8.113  | 10.126 | 5.43E-03 | 9.37E-04 | 1.12  | 2.01  |
| <i>lpg1901</i> | conserved hypothetical protein                                         |             | Unknown / hypothetical proteins          | 9.278  | 9.822  | 7.679  | 10.048 | 3.57E-01 | 1.13E-04 | 0.54  | 2.37  |
| <i>lpg1902</i> | ORF DnaJ-like protein DJIA?                                            |             | Unknown / hypothetical proteins          | 9.231  | 9.161  | 7.358  | 6.690  | 8.69E-01 | 7.67E-01 | -0.07 | -0.67 |
| <i>lpg1902</i> | ORF DnaJ-like protein DJIA?                                            |             | Unknown / hypothetical proteins          | 10.022 | 9.560  | 7.824  | 8.746  | 2.90E-01 | 2.44E-01 | -0.46 | 0.92  |
| <i>lpg1903</i> | hydrolase (esterase/lipase/thioesterase)                               |             | Protein fate / hydrolases / secretion    | 9.013  | 9.751  | 13.240 | 8.479  | 4.82E-01 | 2.53E-05 | 0.74  | -4.76 |
| <i>lpg1903</i> | hydrolase (esterase/lipase/thioesterase)                               |             | Protein fate / hydrolases / secretion    | 9.293  | 10.696 | 13.346 | 8.722  | 2.43E-01 | 6.06E-03 | 1.40  | -4.62 |
| <i>lpg1904</i> | integral membrane protein (transporter, drug/metabolite protein)       |             | Transport and binding                    | 9.069  | 8.713  | 9.251  | 8.301  | 3.57E-01 | 6.06E-02 | -0.36 | -0.95 |
| <i>lpg1904</i> | integral membrane protein (transporter, drug/metabolite protein)       |             | Transport and binding                    | 8.987  | 8.902  | 8.665  | 7.818  | 8.52E-01 | 1.36E-01 | -0.08 | -0.85 |
| <i>lpg1905</i> | ectonucleoside triphosphate diphosphohydrolase I (apyrase) (E-type)    |             | Nucleotide Metabolism                    | 10.364 | 11.168 | 8.389  | 11.011 | 2.00E-01 | 2.59E-02 | 0.80  | 2.62  |
| <i>lpg1905</i> | ectonucleoside triphosphate diphosphohydrolase I (apyrase) (E-type)    |             | Nucleotide Metabolism                    | 9.558  | 11.750 | 8.804  | 11.729 | 1.69E-03 | 1.19E-02 | 2.19  | 2.93  |
| <i>lpg1906</i> | transporting ATPase                                                    |             | Transport and binding                    | 11.720 | 12.442 | 11.888 | 11.938 | 1.53E-02 | 8.66E-01 | 0.72  | 0.05  |
| <i>lpg1906</i> | transporting ATPase                                                    |             | Transport and binding                    | 11.687 | 12.338 | 11.670 | 11.902 | 2.44E-02 | 3.45E-01 | 0.65  | 0.23  |
| <i>lpg1907</i> | ORF                                                                    |             | ORFs of unknown function (unique)        | 9.896  | 11.137 | 10.412 | 9.626  | 1.52E-04 | 2.40E-02 | 1.24  | -0.79 |
| <i>lpg1907</i> | ORF                                                                    |             | ORFs of unknown function (unique)        | 9.856  | 10.967 | 10.177 | 10.114 | 1.31E-03 | 8.85E-01 | 1.11  | -0.06 |
| <i>lpg1908</i> | glutathione S-transferase                                              | <i>gst</i>  | Detoxification / adaptation, Metabolism  | 11.642 | 12.453 | 12.915 | 10.786 | 2.29E-01 | 3.63E-02 | 0.81  | -2.13 |
| <i>lpg1908</i> | glutathione S-transferase                                              | <i>gst</i>  | Detoxification / adaptation, Metabolism  | 11.622 | 12.581 | 12.952 | 10.949 | 1.90E-01 | 5.32E-02 | 0.96  | -2.00 |
| <i>lpg1909</i> | ORF                                                                    |             | ORFs of unknown function (unique)        | 9.876  | 9.025  | 8.383  | 8.583  | 2.97E-02 | 7.99E-01 | -0.85 | 0.20  |
| <i>lpg1909</i> | ORF                                                                    |             | ORFs of unknown function (unique)        | 9.593  | 7.845  | 8.844  | 9.166  | 7.41E-02 | 6.23E-01 | -1.75 | 0.32  |
| <i>lpg1910</i> | D-alanyl-D-alanine carboxypeptidase (DD-peptidase) (beta-lactamase)    |             | Protein fate / hydrolases / secretion    | 10.337 | 9.374  | 9.198  | 9.236  | 2.98E-01 | 9.66E-01 | -0.96 | 0.04  |
| <i>lpg1910</i> | D-alanyl-D-alanine carboxypeptidase (DD-peptidase) (beta-lactamase)    |             | Protein fate / hydrolases / secretion    | 9.937  | 9.230  | 9.301  | 9.620  | 1.33E-01 | 5.71E-01 | -0.91 | 0.32  |
| <i>lpg1911</i> | glutamate tRNA synthetase catalytic subunit (glutamyl tR <i>gltX</i> ) |             | Amino Acid Metabolism, Metabolism o      | 12.167 | 11.973 | 10.111 | 12.225 | 7.35E-01 | 2.56E-03 | -0.19 | 2.11  |
| <i>lpg1911</i> | glutamate tRNA synthetase catalytic subunit (glutamyl tR <i>gltX</i> ) |             | Amino Acid Metabolism, Metabolism o      | 12.219 | 12.078 | 9.738  | 12.268 | 7.97E-01 | 1.86E-03 | -0.14 | 2.53  |
| <i>lpg1912</i> | sensory box histidine kinase/response regulator (two component histi   |             | Signal transduction / other regulatory f | 9.477  | 8.943  | 9.726  | 8.456  | 5.99E-02 | 4.81E-02 | -0.53 | -1.27 |
| <i>lpg1912</i> | sensory box histidine kinase/response regulator (two component histi   |             | Signal transduction / other regulatory f | 8.675  | 9.356  | 9.700  | 8.606  | 4.11E-01 | 2.26E-02 | 0.68  | -1.09 |
| <i>lpg1913</i> | 6-phosphofructokinase                                                  |             | Carbohydrate Metabolism                  | 11.583 | 11.218 | 11.669 | 10.955 | 1.11E-01 | 6.09E-02 | -0.36 | -0.71 |
| <i>lpg1913</i> | 6-phosphofructokinase                                                  |             | Carbohydrate Metabolism                  | 11.523 | 12.043 | 11.128 | 12.240 | 4.45E-01 | 1.13E-01 | 0.52  | 1.11  |
| <i>lpg1914</i> | fimbrial protein, type IV pilin, PiiE                                  | <i>piiE</i> | Transport and binding                    | 10.039 | 9.329  | 12.441 | 8.220  | 2.16E-01 | 4.08E-04 | -0.71 | -4.22 |
| <i>lpg1914</i> | fimbrial protein, type IV pilin, PiiE                                  | <i>piiE</i> | Transport and binding                    | 9.875  | 9.469  | 12.428 | 9.721  | 5.22E-01 | 1.05E-03 | -0.41 | -2.71 |
| <i>lpg1915</i> | Tfp pilus assembly protein, major type IV pilin class A                | <i>piiE</i> | Transport and binding                    | 12.844 | 12.681 | 15.060 | 11.076 | 7.86E-01 | 1.47E-04 | -0.16 | -3.98 |
| <i>lpg1915</i> | Tfp pilus assembly protein, major type IV pilin class A                | <i>piiE</i> | Transport and binding                    | 12.789 | 12.841 | 15.044 | 11.151 | 9.23E-01 | 2.11E-04 | 0.05  | -3.89 |
| <i>lpg1916</i> | possible regulator of murein genes (BoIA protein)                      | <i>bolA</i> | Cell envelope synthesis, Transcription   | 11.257 | 9.497  | 10.441 | 10.842 | 6.32E-05 | 4.48E-01 | -1.76 | 0.40  |
| <i>lpg1916</i> | possible regulator of murein genes (BoIA protein)                      | <i>bolA</i> | Cell envelope synthesis, Transcription   | 10.986 | 9.560  | 10.349 | 11.022 | 3.11E-02 | 7.79E-02 | -1.43 | 0.67  |
| <i>lpg1917</i> | amino acid antiporter (glutamate/gamma-aminobutyrate antiporter)       |             | Transport and binding                    | 10.309 | 10.039 | 10.366 | 9.544  | 4.87E-01 | 1.66E-02 | -0.27 | -0.82 |
| <i>lpg1917</i> | amino acid antiporter (glutamate/gamma-aminobutyrate antiporter)       |             | Transport and binding                    | 10.491 | 10.028 | 10.473 | 9.794  | 1.55E-01 | 4.13E-02 | -0.46 | -0.68 |
| <i>lpg1918</i> | ORF                                                                    |             | ORFs of unknown function (unique)        | 11.547 | 14.140 | 13.233 | 12.024 | 1.14E-04 | 2.85E-02 | 2.59  | -1.21 |
| <i>lpg1918</i> | ORF                                                                    |             | ORFs of unknown function (unique)        | 11.607 | 14.161 | 13.230 | 12.064 | 1.27E-04 | 3.77E-02 | 2.55  | -1.17 |
| <i>lpg1919</i> | 3-deoxy-manno-octulosonate cytidyltransferase (CTP:C <i>kdsB</i> )     |             | Metabolism of Complex Carbohydrate:      | 11.272 | 11.308 | 11.797 | 10.852 | 8.41E-01 | 1.39E-02 | 0.04  | -0.95 |
| <i>lpg1919</i> | 3-deoxy-manno-octulosonate cytidyltransferase (CTP:C <i>kdsB</i> )     |             | Metabolism of Complex Carbohydrate:      | 11.352 | 11.171 | 11.753 | 10.812 | 1.53E-01 | 3.22E-02 | -0.18 | -0.94 |
| <i>lpg1920</i> | tetraacyldisaccharide-1-P-4'-kinase                                    | <i>lpxK</i> | Metabolism of Complex Carbohydrate:      | 11.642 | 11.230 | 9.860  | 11.240 | 4.60E-01 | 8.83E-03 | -0.41 | 1.38  |
| <i>lpg1920</i> | tetraacyldisaccharide-1-P-4'-kinase                                    | <i>lpxK</i> | Metabolism of Complex Carbohydrate:      | 11.703 | 11.144 | 9.504  | 11.039 | 3.12E-01 | 2.02E-02 | -0.56 | 1.53  |
| <i>lpg1921</i> | glycoprotease; metal dependent protease?                               |             | Protein fate / hydrolases / secretion    | 8.457  | 11.559 | 8.899  | 9.916  | 6.21E-03 | 8.37E-03 | 3.10  | 1.02  |
| <i>lpg1921</i> | glycoprotease; metal dependent protease?                               |             | Protein fate / hydrolases / secretion    | 9.196  | 9.908  | 8.914  | 9.953  | 9.63E-02 | 4.27E-03 | 0.71  | 1.04  |
| <i>lpg1922</i> | ATP dependent DNA helicase (DEAD box family) Rad3                      |             | Replication and Repair                   | 9.631  | 10.348 | 8.539  | 9.854  | 3.62E-01 | 5.24E-02 | 0.72  | 1.31  |
| <i>lpg1922</i> | ATP dependent DNA helicase (DEAD box family) Rad3                      |             | Replication and Repair                   | 10.382 | 13.020 | 9.857  | 11.422 | 1.76E-04 | 1.85E-02 | 2.64  | 1.57  |
| <i>lpg1923</i> | ferredoxin II (ferredoxin, 4Fe-4S)                                     |             | Energy Metabolism                        | 12.527 | 11.977 | 10.664 | 11.485 | 4.10E-01 | 1.48E-01 | -0.55 | 0.82  |
| <i>lpg1923</i> | ferredoxin II (ferredoxin, 4Fe-4S)                                     |             | Energy Metabolism                        | 12.204 | 11.767 | 10.432 | 11.688 | 5.98E-01 | 3.69E-02 | -0.44 | 1.26  |
| <i>lpg1924</i> | hypothetical protein                                                   |             | Unknown / hypothetical proteins          | 8.061  | 9.647  | 8.339  | 9.724  | 4.34E-02 | 2.07E-02 | 1.59  | 1.38  |
| <i>lpg1924</i> | hypothetical protein                                                   |             | Unknown / hypothetical proteins          | 7.220  | 10.176 | 8.123  | 9.671  | 1.32E-02 | 1.03E-01 | 2.96  | 1.55  |
| <i>lpg1925</i> | ORF                                                                    |             | ORFs of unknown function (unique)        | 9.756  | 9.659  | 10.891 | 10.196 | 8.18E-01 | 1.42E-01 | -0.10 | -0.70 |
| <i>lpg1925</i> | ORF                                                                    |             | ORFs of unknown function (unique)        | 9.259  | 9.764  | 10.821 | 10.462 | 2.31E-01 | 3.59E-01 | 0.50  | -0.36 |
| <i>lpg1926</i> | hypothetical protein                                                   |             | Unknown / hypothetical proteins          | 9.798  | 9.399  | 13.030 | 8.587  | 6.31E-01 | 4.01E-04 | -0.40 | -4.44 |
| <i>lpg1926</i> | hypothetical protein                                                   |             | Unknown / hypothetical proteins          | 9.649  | 9.643  | 12.940 | 8.944  | 9.94E-01 | 6.72E-04 | -0.01 | -4.00 |
| <i>lpg1927</i> | conserved hypothetical protein                                         |             | Unknown / hypothetical proteins          | 11.452 | 11.145 | 12.479 | 11.525 | 2.82E-01 | 3.01E-02 | -0.31 | -0.95 |
| <i>lpg1927</i> | conserved hypothetical protein                                         |             | Unknown / hypothetical proteins          | 11.473 | 11.613 | 12.431 | 11.871 | 7.56E-01 | 2.02E-01 | 0.14  | -0.56 |
| <i>lpg1928</i> | enzyme involved in pigment biosynthesis?                               | <i>indA</i> | Toxin production / other pathogen func   | 9.704  | 8.670  | 11.153 | 9.355  | 2.17E-01 | 7.93E-03 | -1.03 | -1.80 |
| <i>lpg1928</i> | enzyme involved in pigment biosynthesis?                               | <i>indA</i> | Toxin production / other pathogen func   | 9.287  | 9.413  | 10.805 | 9.750  | 7.89E-01 | 1.84E-01 | 0.13  | -1.05 |
| <i>lpg1929</i> | tRNA-Phe                                                               |             | tRNA                                     | 10.841 | 8.291  | 9.895  | 10.777 | 1.19E-01 | 2.10E-01 | -2.55 | 0.88  |
| <i>lpg1929</i> | tRNA-Phe                                                               |             | tRNA                                     | 11.121 | 9.783  | 9.568  | 10.547 | 1.62E-02 | 2.05E-01 | -1.34 | 0.98  |
| <i>lpg1930</i> | ORF                                                                    |             | ORFs of unknown function (unique)        | 10.301 | 10.869 | 10.482 | 10.131 | 6.01E-02 | 2.15E-01 | 0.57  | -0.35 |
| <i>lpg1930</i> | ORF                                                                    |             | ORFs of unknown function (unique)        | 10.135 | 10.964 | 10.577 | 10.782 | 2.62E-02 | 7.19E-01 | 0.83  | 0.20  |
| <i>lpg1931</i> | ORF                                                                    |             | ORFs of unknown function (unique)        | 10.053 | 8.874  | 8.741  | 8.110  | 5.35E-02 | 4.57E-01 | -1.18 | -0.63 |
| <i>lpg1931</i> | ORF                                                                    |             | ORFs of unknown function (unique)        | 10.199 | 9.482  | 8.272  | 8.276  | 3.97E-03 | 9.96E-01 | -0.72 | 0.00  |

|                |                                                                         |               |                                           |        |        |        |        |          |          |       |       |
|----------------|-------------------------------------------------------------------------|---------------|-------------------------------------------|--------|--------|--------|--------|----------|----------|-------|-------|
| <i>lpg1932</i> | small ORF (104aa)                                                       |               | ORFs of unknown function (unique)         | 9.981  | 9.548  | 9.811  | 9.778  | 3.27E-01 | 9.52E-01 | -0.43 | -0.03 |
| <i>lpg1932</i> | small ORF (104aa)                                                       |               | ORFs of unknown function (unique)         | 9.893  | 9.299  | 9.356  | 9.680  | 3.75E-02 | 4.55E-01 | -0.59 | 0.32  |
| <i>lpg1933</i> | ORF                                                                     |               | ORFs of unknown function (unique)         | 8.953  | 10.091 | 10.193 | 9.951  | 1.98E-02 | 5.26E-01 | 1.14  | -0.24 |
| <i>lpg1933</i> | ORF                                                                     |               | ORFs of unknown function (unique)         | 9.303  | 10.143 | 10.253 | 10.095 | 1.77E-01 | 6.73E-01 | 0.84  | -0.16 |
| <i>lpg1934</i> | hypothetical (HipA transcription factor?) (stringent stress response, c |               | Signal transduction / other regulatory f  | 10.380 | 10.577 | 8.985  | 10.873 | 5.45E-01 | 2.21E-03 | 0.20  | 1.89  |
| <i>lpg1934</i> | hypothetical (HipA transcription factor?) (stringent stress response, c |               | Signal transduction / other regulatory f  | 10.507 | 10.574 | 8.381  | 10.643 | 8.47E-01 | 2.07E-02 | 0.07  | 2.26  |
| <i>lpg1935</i> | small ORF (93aa) HTH motif? transcriptional regulator?                  |               | Transcription factors / DNA binding pr    | 8.843  | 7.886  | 8.595  | 7.785  | 2.61E-01 | 5.07E-01 | -0.96 | -0.81 |
| <i>lpg1935</i> | small ORF (93aa) HTH motif? transcriptional regulator?                  |               | Transcription factors / DNA binding pr    | 8.941  | 9.151  | 8.376  | 8.692  | 8.85E-01 | 7.99E-01 | 0.21  | 0.32  |
| <i>lpg1936</i> | methoxymalonyl CoA synthase (31-O-demethyl-FK506 methyltransfer         |               | Named proteins of general function        | 10.545 | 10.345 | 10.662 | 10.293 | 7.40E-01 | 1.99E-01 | -0.20 | -0.37 |
| <i>lpg1936</i> | methoxymalonyl CoA synthase (31-O-demethyl-FK506 methyltransfer         |               | Named proteins of general function        | 10.404 | 10.526 | 10.620 | 10.538 | 8.38E-01 | 8.03E-01 | 0.12  | -0.08 |
| <i>lpg1937</i> | pyoverdine biosynthesis regulatory gene (SyrP-like protein)             |               | Named proteins of general function        | 9.597  | 9.532  | 10.440 | 9.152  | 6.99E-01 | 2.30E-03 | -0.06 | -1.29 |
| <i>lpg1937</i> | pyoverdine biosynthesis regulatory gene (SyrP-like protein)             |               | Named proteins of general function        | 9.564  | 9.428  | 10.102 | 8.971  | 5.74E-01 | 5.34E-03 | -0.14 | -1.13 |
| <i>lpg1938</i> | coenzyme F390 synthetase (capsular polysaccharide biosynthesis pr       |               | Cell envelope synthesis                   | 9.458  | 7.360  | 8.888  | 6.659  | 1.74E-02 | 1.73E-01 | -2.10 | -2.23 |
| <i>lpg1938</i> | coenzyme F390 synthetase (capsular polysaccharide biosynthesis pr       |               | Cell envelope synthesis                   | 9.551  | 8.231  | 8.789  | 8.238  | 3.56E-03 | 7.16E-01 | -1.32 | -0.55 |
| <i>lpg1939</i> | polyketide synthase, type I                                             |               | Named proteins of general function        | 9.862  | 8.759  | 11.845 | 8.589  | 9.76E-02 | 1.00E-02 | -1.10 | -3.26 |
| <i>lpg1939</i> | polyketide synthase, type I                                             |               | Named proteins of general function        | 9.828  | 8.659  | 11.935 | 9.164  | 7.08E-02 | 6.74E-03 | -1.17 | -2.77 |
| <i>lpg1940</i> | peptide synthetase (mycosubtilin (iturin antibiotic) synthetase MycC    |               | (r Toxin production / other pathogen func | 11.752 | 10.803 | 12.677 | 11.138 | 4.59E-02 | 1.69E-03 | -0.95 | -1.54 |
| <i>lpg1940</i> | peptide synthetase (mycosubtilin (iturin antibiotic) synthetase MycC    |               | (r Toxin production / other pathogen func | 11.751 | 11.043 | 12.710 | 11.315 | 1.03E-01 | 1.42E-03 | -0.71 | -1.40 |
| <i>lpg1941</i> | acyl CoA dehydrogenase (butyryl CoA dehydrogenase)                      |               | Carbohydrate Metabolism, Biodegrad        | 10.917 | 10.769 | 11.457 | 10.791 | 5.55E-01 | 1.39E-01 | -0.15 | -0.67 |
| <i>lpg1941</i> | acyl CoA dehydrogenase (butyryl CoA dehydrogenase)                      |               | Carbohydrate Metabolism, Biodegrad        | 10.873 | 10.890 | 11.409 | 10.766 | 9.31E-01 | 1.16E-01 | 0.02  | -0.64 |
| <i>lpg1942</i> | 3-hydroxyacyl CoA dehydrogenase (beta-hydroxybutyryl CoA dehydr         |               | Biodegradation of Xenobiotics, Carbo      | 12.411 | 11.621 | 12.584 | 11.917 | 1.08E-02 | 5.21E-02 | -0.79 | -0.67 |
| <i>lpg1942</i> | 3-hydroxyacyl CoA dehydrogenase (beta-hydroxybutyryl CoA dehydr         |               | Biodegradation of Xenobiotics, Carbo      | 12.122 | 11.678 | 12.669 | 12.078 | 1.72E-01 | 8.19E-02 | -0.44 | -0.59 |
| <i>lpg1943</i> | small ORF (85aa) hypothetical                                           |               | Unknown / hypothetical proteins           | 13.484 | 11.998 | 11.072 | 11.071 | 1.69E-02 | 9.99E-01 | -1.49 | 0.00  |
| <i>lpg1943</i> | small ORF (85aa) hypothetical                                           |               | Unknown / hypothetical proteins           | 13.294 | 11.980 | 11.085 | 11.188 | 8.58E-02 | 8.25E-01 | -1.31 | 0.10  |
| <i>lpg1944</i> | conserved hypothetical protein                                          |               | Unknown / hypothetical proteins           | 9.041  | 9.115  | 11.108 | 8.905  | 9.23E-01 | 4.03E-02 | 0.07  | -2.20 |
| <i>lpg1944</i> | conserved hypothetical protein                                          |               | Unknown / hypothetical proteins           | 9.517  | 8.917  | 10.357 | 9.087  | 4.04E-01 | 3.43E-01 | -0.60 | -1.27 |
| <i>lpg1945</i> | 3',5'-cyclic nucleotide phosphodiesterase                               |               | Signal transduction / other regulatory f  | 13.236 | 11.541 | 11.358 | 13.026 | 8.97E-04 | 8.22E-03 | -1.69 | 1.67  |
| <i>lpg1945</i> | 3',5'-cyclic nucleotide phosphodiesterase                               |               | Signal transduction / other regulatory f  | 13.227 | 12.162 | 11.344 | 13.226 | 1.70E-01 | 4.85E-03 | -1.07 | 1.88  |
| <i>lpg1946</i> | transcriptional regulator LuxR                                          |               | Transcription factors / DNA binding pr    | 9.628  | 9.303  | 10.380 | 8.584  | 3.20E-01 | 7.22E-03 | -0.33 | -1.80 |
| <i>lpg1946</i> | transcriptional regulator LuxR                                          |               | Transcription factors / DNA binding pr    | 10.072 | 9.576  | 10.767 | 9.195  | 3.39E-01 | 2.55E-03 | -0.50 | -1.57 |
| <i>lpg1947</i> | hypothetical protein                                                    |               | Unknown / hypothetical proteins           | 8.399  | 9.730  | 9.203  | 9.068  | 5.34E-02 | 7.56E-01 | 1.33  | -0.13 |
| <i>lpg1947</i> | hypothetical protein                                                    |               | Unknown / hypothetical proteins           | 8.518  | 9.954  | 9.336  | 9.325  | 1.47E-02 | 9.81E-01 | 1.44  | -0.01 |
| <i>lpg1948</i> | FLJ00180 protein                                                        | <i>legLC4</i> | Unknown / hypothetical proteins           | 10.546 | 13.233 | 12.020 | 11.213 | 5.46E-02 | 1.73E-01 | 2.69  | -0.81 |
| <i>lpg1948</i> | FLJ00180 protein                                                        | <i>legLC4</i> | Unknown / hypothetical proteins           | 10.330 | 13.623 | 11.897 | 11.340 | 3.46E-03 | 2.04E-01 | 3.29  | -0.56 |
| <i>lpg1949</i> | hypothetical protein                                                    |               | Unknown / hypothetical proteins           | 9.338  | 7.907  | 11.021 | 8.168  | 2.32E-02 | 1.10E-03 | -1.43 | -2.85 |
| <i>lpg1949</i> | hypothetical protein                                                    |               | Unknown / hypothetical proteins           | 9.437  | 8.345  | 10.922 | 8.821  | 1.04E-01 | 1.44E-03 | -1.09 | -2.10 |
| <i>lpg1950</i> | guanine nucleotide exchange protein (RalF) (ADP ribosyl RalF            |               | Toxin production / other pathogen func    | 10.199 | 9.913  | 12.433 | 9.469  | 5.87E-01 | 1.20E-03 | -0.29 | -2.96 |
| <i>lpg1950</i> | guanine nucleotide exchange protein (RalF) (ADP ribosyl RalF            |               | Toxin production / other pathogen func    | 10.055 | 9.786  | 12.358 | 9.672  | 6.97E-01 | 1.16E-02 | -0.27 | -2.69 |
| <i>lpg1951</i> | hypothetical                                                            |               | Unknown / hypothetical proteins           | 9.397  | 9.147  | 11.272 | 9.412  | 6.70E-01 | 2.43E-02 | -0.25 | -1.86 |
| <i>lpg1951</i> | hypothetical                                                            |               | Unknown / hypothetical proteins           | 9.855  | 9.468  | 11.369 | 9.589  | 5.27E-01 | 8.21E-03 | -0.39 | -1.78 |
| <i>lpg1952</i> | 3',5'-cyclic nucleotide phosphodiesterase                               |               | Nucleotide Metabolism                     | 9.204  | 9.313  | 10.434 | 9.639  | 6.87E-01 | 3.78E-01 | 0.11  | -0.80 |
| <i>lpg1952</i> | 3',5'-cyclic nucleotide phosphodiesterase                               |               | Nucleotide Metabolism                     | 8.872  | 8.655  | 9.233  | 9.038  | 7.42E-01 | 8.46E-01 | -0.22 | -0.20 |
| <i>lpg1953</i> | ORF                                                                     | <i>legC3</i>  | ORFs of unknown function (unique)         | 9.696  | 11.059 | 10.445 | 10.703 | 4.58E-04 | 2.46E-01 | 1.36  | 0.26  |
| <i>lpg1953</i> | ORF                                                                     | <i>legC3</i>  | ORFs of unknown function (unique)         | 10.242 | 10.898 | 10.601 | 10.864 | 1.61E-01 | 1.94E-01 | 0.66  | 0.26  |
| <i>lpg1954</i> | ORF                                                                     |               | ORFs of unknown function (unique)         | 8.360  | 6.938  | 8.365  | 6.703  | 1.94E-01 | 1.91E-01 | -1.42 | -1.66 |
| <i>lpg1954</i> | ORF                                                                     |               | ORFs of unknown function (unique)         | 8.041  | 7.553  | 8.823  | 7.419  | 4.89E-01 | 2.25E-01 | -0.49 | -1.40 |
| <i>lpg1955</i> | hypothetical (gluconate permease?) (transport protein)                  |               | Transport and binding                     | 8.816  | 9.743  | 9.007  | 11.626 | 4.30E-01 | 3.13E-04 | 0.93  | 2.62  |
| <i>lpg1955</i> | hypothetical (gluconate permease?) (transport protein)                  |               | Transport and binding                     | 9.754  | 11.155 | 9.310  | 12.243 | 1.28E-02 | 9.74E-05 | 1.40  | 2.93  |
| <i>lpg1956</i> | chloromuconate cycloisomerase (mandelate racemase/muconate lacI         |               | Named proteins of general function        | 8.938  | 10.757 | 8.373  | 11.015 | 3.41E-02 | 5.02E-05 | 1.82  | 2.64  |
| <i>lpg1956</i> | chloromuconate cycloisomerase (mandelate racemase/muconate lacI         |               | Named proteins of general function        | 9.589  | 11.148 | 8.178  | 11.608 | 4.70E-02 | 4.08E-03 | 1.56  | 3.43  |
| <i>lpg1957</i> | ebhA protein                                                            |               | Named proteins of general function        | 10.539 | 11.811 | 9.874  | 11.740 | 8.02E-02 | 6.95E-02 | 1.27  | 1.87  |
| <i>lpg1957</i> | ebhA protein                                                            |               | Named proteins of general function        | 10.959 | 11.739 | 9.515  | 11.817 | 1.86E-01 | 1.32E-02 | 0.78  | 2.30  |
| <i>lpg1958</i> | FLJ00180 protein                                                        | <i>legL5</i>  | Unknown / hypothetical proteins           | 9.618  | 9.895  | 10.460 | 9.734  | 4.53E-01 | 1.79E-02 | 0.28  | -0.73 |
| <i>lpg1958</i> | FLJ00180 protein                                                        | <i>legL5</i>  | Unknown / hypothetical proteins           | 9.306  | 10.210 | 10.361 | 10.423 | 8.07E-02 | 8.61E-01 | 0.90  | 0.06  |
| <i>lpg1959</i> | ORF                                                                     |               | ORFs of unknown function (unique)         | 9.284  | 8.226  | 9.285  | 8.788  | 2.23E-01 | 1.65E-01 | -0.46 | -0.50 |
| <i>lpg1959</i> | ORF                                                                     |               | ORFs of unknown function (unique)         | 9.164  | 8.667  | 7.622  | 9.083  | 3.07E-01 | 2.32E-01 | -0.50 | 1.46  |
| <i>lpg1960</i> | ORF                                                                     |               | ORFs of unknown function (unique)         | 11.056 | 11.965 | 14.371 | 10.223 | 4.09E-01 | 3.12E-04 | 0.91  | -4.15 |
| <i>lpg1960</i> | ORF                                                                     |               | ORFs of unknown function (unique)         | 11.001 | 11.841 | 14.347 | 10.371 | 4.62E-01 | 4.22E-04 | 0.84  | -3.98 |
| <i>lpg1961</i> | ORF                                                                     |               | ORFs of unknown function (unique)         | 9.731  | 10.928 | 10.880 | 10.548 | 4.54E-02 | 6.44E-01 | 1.20  | -0.33 |
| <i>lpg1961</i> | ORF                                                                     |               | ORFs of unknown function (unique)         | 9.736  | 11.482 | 11.284 | 11.153 | 7.99E-02 | 8.94E-01 | 1.75  | -0.13 |
| <i>lpg1962</i> | peptidyl-prolyl cis-trans isomerase (rotamase)                          |               | Toxin production / other pathogen func    | 10.768 | 10.733 | 9.524  | 10.010 | 9.40E-01 | 4.33E-01 | -0.04 | 0.49  |
| <i>lpg1962</i> | peptidyl-prolyl cis-trans isomerase (rotamase)                          |               | Toxin production / other pathogen func    | 10.991 | 10.696 | 9.347  | 11.013 | 6.17E-01 | 2.02E-01 | -0.29 | 1.67  |
| <i>lpg1963</i> | hypothetical protein                                                    |               | Unknown / hypothetical proteins           | 10.345 | 8.781  | 13.289 | 8.066  | 1.57E-01 | 1.14E-04 | -1.56 | -5.22 |
| <i>lpg1963</i> | hypothetical protein                                                    |               | Unknown / hypothetical proteins           | 10.379 | 9.085  | 13.335 | 8.408  | 1.53E-01 | 4.59E-04 | -1.29 | -4.93 |

|                |                                                                        |              |                                         |        |        |        |        |          |          |       |       |
|----------------|------------------------------------------------------------------------|--------------|-----------------------------------------|--------|--------|--------|--------|----------|----------|-------|-------|
| <i>lpg1964</i> | ORF                                                                    |              | ORFs of unknown function (unique)       | 8.987  | 9.770  | 9.351  | 9.172  | 2.05E-01 | 8.19E-01 | 0.78  | -0.18 |
| <i>lpg1964</i> | ORF                                                                    |              | ORFs of unknown function (unique)       | 9.309  | 10.224 | 9.385  | 9.868  | 1.37E-01 | 3.98E-01 | 0.91  | 0.48  |
| <i>lpg1965</i> | hypothetical protein                                                   |              | Unknown / hypothetical proteins         | 8.558  | 9.754  | 9.495  | 8.304  | 1.96E-03 | 5.71E-02 | 1.20  | -1.19 |
| <i>lpg1965</i> | hypothetical protein                                                   |              | Unknown / hypothetical proteins         | 8.591  | 10.523 | 9.633  | 9.958  | 5.33E-05 | 6.67E-01 | 1.93  | 0.33  |
| <i>lpg1966</i> | ORF                                                                    |              | ORFs of unknown function (unique)       | 10.251 | 10.780 | 9.838  | 9.743  | 2.82E-01 | 9.09E-01 | 0.53  | -0.09 |
| <i>lpg1966</i> | ORF                                                                    |              | ORFs of unknown function (unique)       | 10.223 | 10.380 | 9.814  | 9.722  | 7.49E-01 | 9.18E-01 | 0.16  | -0.09 |
| <i>lpg1967</i> | transcriptional regulator, TetR family (tetracyclin resistance)        |              | Transcription factors / DNA binding prc | 10.126 | 9.868  | 10.870 | 9.947  | 4.08E-01 | 1.06E-01 | -0.26 | -0.92 |
| <i>lpg1967</i> | transcriptional regulator, TetR family (tetracyclin resistance)        |              | Transcription factors / DNA binding prc | 9.994  | 9.971  | 11.041 | 10.213 | 9.44E-01 | 1.00E-01 | -0.02 | -0.83 |
| <i>lpg1968</i> | hypothetical protein                                                   |              | Unknown / hypothetical proteins         | 7.115  | 8.899  | 8.571  | 9.427  | 7.19E-02 | 1.71E-01 | 1.78  | 0.86  |
| <i>lpg1968</i> | hypothetical protein                                                   |              | Unknown / hypothetical proteins         | 7.840  | 8.633  | 7.917  | 9.133  | 3.95E-01 | 2.09E-01 | 0.79  | 1.22  |
| <i>lpg1969</i> | putative                                                               |              | Unknown / hypothetical proteins         | 11.025 | 9.547  | 11.247 | 9.571  | 1.08E-01 | 1.13E-01 | -1.48 | -1.68 |
| <i>lpg1969</i> | putative                                                               |              | Unknown / hypothetical proteins         | 10.217 | 9.812  | 11.104 | 9.790  | 5.15E-01 | 2.57E-02 | -0.41 | -1.31 |
| <i>lpg1970</i> | glutathione S-transferase                                              |              | Metabolism of Other Amino Acids         | 11.491 | 11.303 | 10.050 | 11.098 | 7.30E-01 | 9.43E-02 | -0.19 | 1.05  |
| <i>lpg1970</i> | glutathione S-transferase                                              |              | Metabolism of Other Amino Acids         | 11.688 | 11.480 | 9.219  | 11.420 | 5.82E-01 | 7.46E-02 | -0.21 | 2.20  |
| <i>lpg1971</i> | organic hydroperoxide resistance protein, COG1764:predicted redox      |              | Detoxification / adaptation             | 11.031 | 10.965 | 9.736  | 11.004 | 8.87E-01 | 4.50E-02 | -0.07 | 1.27  |
| <i>lpg1971</i> | organic hydroperoxide resistance protein, COG1764:predicted redox      |              | Detoxification / adaptation             | 10.816 | 10.817 | 8.591  | 11.218 | 9.99E-01 | 1.49E-02 | 0.00  | 2.63  |
| <i>lpg1972</i> | small ORF (125aa)                                                      |              | ORFs of unknown function (unique)       | 12.066 | 15.133 | 12.523 | 12.103 | 4.61E-06 | 8.05E-02 | 3.07  | -0.42 |
| <i>lpg1972</i> | small ORF (125aa)                                                      |              | ORFs of unknown function (unique)       | 12.064 | 15.140 | 12.481 | 12.165 | 2.17E-06 | 1.22E-01 | 3.08  | -0.32 |
| <i>lpg1973</i> | ORF                                                                    |              | ORFs of unknown function (unique)       | 11.853 | 12.152 | 12.303 | 11.617 | 3.63E-01 | 3.84E-04 | 0.30  | -0.69 |
| <i>lpg1973</i> | ORF                                                                    |              | ORFs of unknown function (unique)       | 11.917 | 11.826 | 12.374 | 11.748 | 6.18E-01 | 2.50E-03 | -0.09 | -0.63 |
| <i>lpg1974</i> | major outer membrane protein                                           |              | Toxin production / other pathogen func  | 13.406 | 12.816 | 12.286 | 11.688 | 2.07E-01 | 1.60E-01 | -0.59 | -0.60 |
| <i>lpg1974</i> | major outer membrane protein                                           |              | Toxin production / other pathogen func  | 13.355 | 12.825 | 12.087 | 11.748 | 2.83E-01 | 4.51E-01 | -0.53 | -0.34 |
| <i>lpg1975</i> | ORF                                                                    |              | ORFs of unknown function (unique)       | 9.971  | 9.391  | 9.278  | 9.777  | 9.93E-02 | 1.33E-01 | -0.58 | 0.50  |
| <i>lpg1975</i> | ORF                                                                    |              | ORFs of unknown function (unique)       | 10.005 | 9.278  | 9.224  | 9.847  | 1.12E-01 | 3.10E-01 | -0.73 | 0.62  |
| <i>lpg1976</i> | UVB-resistance protein UVR8                                            | <i>legG1</i> | Named proteins of general function      | 7.367  | 10.401 | 7.843  | 7.909  | 3.53E-04 | 9.49E-01 | 3.73  | 0.07  |
| <i>lpg1976</i> | UVB-resistance protein UVR8                                            | <i>legG1</i> | Named proteins of general function      | 6.781  | 10.554 | 7.866  | 8.294  | 3.39E-04 | 6.48E-01 | 3.77  | 0.43  |
| <i>lpg1977</i> | intracellular protease (ThiJ/PfpI family)                              |              | Protein fate / hydrolases / secretion   | 9.497  | 10.892 | 11.285 | 10.277 | 1.17E-01 | 9.52E-02 | 1.40  | -1.01 |
| <i>lpg1977</i> | intracellular protease (ThiJ/PfpI family)                              |              | Protein fate / hydrolases / secretion   | 9.546  | 11.130 | 10.760 | 10.525 | 3.32E-02 | 7.68E-01 | 1.58  | -0.24 |
| <i>lpg1978</i> | hypothetical Teichoic Acid Biosynthesis Protein)                       |              | Named proteins of general function      | 7.135  | 9.642  | 8.936  | 9.401  | 3.20E-02 | 2.65E-01 | 2.51  | 0.46  |
| <i>lpg1978</i> | hypothetical Teichoic Acid Biosynthesis Protein)                       |              | Named proteins of general function      | 7.610  | 9.531  | 8.760  | 9.454  | 6.85E-03 | 1.99E-01 | 1.92  | 0.69  |
| <i>lpg1979</i> | ORF                                                                    |              | ORFs of unknown function (unique)       | 7.959  | 8.637  | 8.029  | 8.520  | 2.89E-01 | 6.37E-01 | 0.68  | 0.49  |
| <i>lpg1979</i> | ORF                                                                    |              | ORFs of unknown function (unique)       | 9.033  | 8.999  | 6.863  | 7.419  | 9.75E-01 | 7.65E-01 | -0.03 | 0.56  |
| <i>lpg1980</i> | small ORF (100aa)                                                      |              | ORFs of unknown function (unique)       | 9.281  | 8.578  | 8.944  | 7.828  | 1.44E-01 | 2.92E-01 | -0.70 | -1.12 |
| <i>lpg1980</i> | small ORF (100aa)                                                      |              | ORFs of unknown function (unique)       | 9.132  | 8.723  | 8.668  | 8.315  | 2.54E-01 | 5.53E-01 | -0.41 | -0.35 |
| <i>lpg1981</i> | small ORF (98aa)                                                       |              | ORFs of unknown function (unique)       | 8.133  | 9.382  | 8.036  | 9.114  | 3.93E-02 | 3.69E-01 | 1.25  | 1.08  |
| <i>lpg1981</i> | small ORF (98aa)                                                       |              | ORFs of unknown function (unique)       | 8.554  | 10.605 | 7.932  | 10.299 | 2.47E-03 | 3.61E-03 | 2.05  | 2.37  |
| <i>lpg1982</i> | hypothetical protein                                                   |              | Unknown / hypothetical proteins         | 8.896  | 8.664  | 10.229 | 7.809  | 7.53E-01 | 9.66E-03 | -0.23 | -2.42 |
| <i>lpg1982</i> | hypothetical protein                                                   |              | Unknown / hypothetical proteins         | 8.896  | 8.353  | 9.853  | 8.432  | 4.03E-01 | 2.63E-02 | -0.54 | -1.42 |
| <i>lpg1983</i> | protein product; some similarities with 3-hydroxy-3-methylglutaryl coe |              | Unknown / hypothetical proteins         | 9.237  | 9.061  | 10.184 | 8.083  | 7.79E-01 | 1.83E-01 | -0.18 | -2.10 |
| <i>lpg1983</i> | protein product; some similarities with 3-hydroxy-3-methylglutaryl coe |              | Unknown / hypothetical proteins         | 9.228  | 9.160  | 10.157 | 8.248  | 9.19E-01 | 1.36E-01 | -0.07 | -1.91 |
| <i>lpg1984</i> | hydantoin racemase                                                     | <i>hyuE</i>  | Named proteins of general function      | 9.011  | 8.598  | 10.322 | 8.324  | 1.09E-01 | 1.43E-02 | -0.41 | -2.00 |
| <i>lpg1984</i> | hydantoin racemase                                                     | <i>hyuE</i>  | Named proteins of general function      | 9.292  | 8.927  | 10.268 | 8.812  | 3.29E-01 | 2.78E-02 | -0.37 | -1.46 |
| <i>lpg1985</i> | guanine aminohydrolase (guanine deaminase)                             | <i>gad</i>   | Nucleotide Metabolism                   | 9.293  | 9.787  | 11.454 | 9.293  | 5.64E-01 | 9.67E-03 | 0.49  | -2.16 |
| <i>lpg1985</i> | guanine aminohydrolase (guanine deaminase)                             | <i>gad</i>   | Nucleotide Metabolism                   | 9.202  | 9.610  | 11.064 | 9.749  | 6.98E-01 | 1.19E-01 | 0.41  | -1.31 |
| <i>lpg1986</i> | ORF                                                                    |              | ORFs of unknown function (unique)       | 8.390  | 9.266  | 9.554  | 9.504  | 1.48E-01 | 9.05E-01 | 0.88  | -0.05 |
| <i>lpg1986</i> | ORF                                                                    |              | ORFs of unknown function (unique)       | 9.496  | 9.644  | 9.484  | 10.540 | 7.66E-01 | 7.74E-02 | 0.15  | 1.06  |
| <i>lpg1987</i> | phosphohistidine phosphatase SixA                                      |              | Carbohydrate Metabolism, Metabolism     | 9.095  | 8.433  | 10.261 | 8.241  | 1.66E-01 | 5.86E-02 | -0.66 | -2.02 |
| <i>lpg1987</i> | phosphohistidine phosphatase SixA                                      |              | Carbohydrate Metabolism, Metabolism     | 8.592  | 8.166  | 10.264 | 8.579  | 4.40E-01 | 6.54E-02 | -0.43 | -1.69 |
| <i>lpg1988</i> | dihydrofolate reductase                                                |              | Metabolism of Cofactors and Vitamins    | 9.911  | 10.670 | 8.603  | 10.088 | 1.34E-01 | 5.31E-03 | 0.76  | 1.49  |
| <i>lpg1988</i> | dihydrofolate reductase                                                |              | Metabolism of Cofactors and Vitamins    | 9.733  | 10.551 | 7.616  | 10.075 | 5.36E-02 | 1.92E-03 | 0.82  | 2.46  |
| <i>lpg1989</i> | glutathione S-transferase?                                             |              | Detoxification / adaptation             | 10.003 | 8.532  | 9.432  | 8.221  | 2.32E-02 | 4.90E-02 | -1.47 | -1.21 |
| <i>lpg1989</i> | glutathione S-transferase?                                             |              | Detoxification / adaptation             | 9.857  | 8.337  | 9.239  | 8.122  | 5.53E-02 | 2.39E-01 | -1.52 | -1.12 |
| <i>lpg1990</i> | ORF                                                                    |              | ORFs of unknown function (unique)       | 8.953  | 7.353  | 7.178  | 4.874  | 1.85E-01 | 1.71E-01 | -1.60 | -2.30 |
| <i>lpg1990</i> | ORF                                                                    |              | ORFs of unknown function (unique)       | 8.541  | 8.304  | 6.469  | 4.402  | 7.17E-01 | 3.47E-01 | -0.24 | -2.07 |
| <i>lpg1991</i> | hypothetical conserved protein                                         |              | Unknown / hypothetical proteins         | 10.056 | 9.309  | 9.733  | 9.197  | 1.09E-01 | 4.38E-01 | -0.75 | -0.54 |
| <i>lpg1991</i> | hypothetical conserved protein                                         |              | Unknown / hypothetical proteins         | 10.029 | 8.405  | 9.758  | 9.299  | 1.04E-02 | 4.24E-01 | -1.62 | -0.46 |
| <i>lpg1992</i> | ORF                                                                    |              | ORFs of unknown function (unique)       | 11.350 | 11.602 | 12.315 | 11.487 | 6.94E-01 | 2.31E-01 | 0.25  | -0.83 |
| <i>lpg1992</i> | ORF                                                                    |              | ORFs of unknown function (unique)       | 11.306 | 11.716 | 12.236 | 11.666 | 4.00E-01 | 2.14E-01 | 0.41  | -0.57 |
| <i>lpg1993</i> | polysaccharide deacetylase                                             |              | Metabolism of Complex Carbohydrate:     | 10.217 | 8.695  | 12.985 | 8.852  | 2.01E-01 | 1.36E-03 | -1.52 | -4.13 |
| <i>lpg1993</i> | polysaccharide deacetylase                                             |              | Metabolism of Complex Carbohydrate:     | 10.313 | 9.800  | 12.995 | 9.015  | 6.61E-01 | 4.36E-03 | -0.51 | -3.98 |
| <i>lpg1994</i> | (outer) membrane bound lytic murein transglycosylase family protein    |              | Metabolism of Complex Carbohydrate:     | 11.638 | 11.789 | 10.983 | 11.701 | 6.14E-01 | 6.33E-03 | 0.15  | 0.72  |
| <i>lpg1994</i> | (outer) membrane bound lytic murein transglycosylase family protein    |              | Metabolism of Complex Carbohydrate:     | 11.781 | 11.829 | 10.948 | 11.724 | 7.90E-01 | 2.24E-03 | 0.05  | 0.78  |
| <i>lpg1995</i> | ORF                                                                    |              | ORFs of unknown function (unique)       | 9.332  | 8.736  | 8.319  | 8.712  | 1.28E-01 | 6.34E-01 | -0.60 | 0.39  |
| <i>lpg1995</i> | ORF                                                                    |              | ORFs of unknown function (unique)       | 9.652  | 9.043  | 8.515  | 8.923  | 1.67E-01 | 6.34E-01 | -0.61 | 0.41  |

|                |                                                                          |              |                                           |        |        |        |        |          |          |       |       |
|----------------|--------------------------------------------------------------------------|--------------|-------------------------------------------|--------|--------|--------|--------|----------|----------|-------|-------|
| <i>lpg1996</i> | ORF (PiIW?)                                                              |              | Unknown / hypothetical proteins           | 11.048 | 8.617  | 9.118  | 7.926  | 5.86E-02 | 3.25E-01 | -2.43 | -1.19 |
| <i>lpg1996</i> | ORF (PiIW?)                                                              |              | Unknown / hypothetical proteins           | 10.056 | 8.549  | 7.861  | 8.424  | 2.19E-02 | 5.26E-01 | -1.51 | 0.56  |
| <i>lpg1997</i> | small ORF (104aa)                                                        |              | ORFs of unknown function (unique)         | 11.629 | 10.780 | 8.875  | 11.411 | 5.54E-02 | 4.18E-03 | -0.85 | 2.54  |
| <i>lpg1997</i> | small ORF (104aa)                                                        |              | ORFs of unknown function (unique)         | 11.393 | 10.757 | 8.203  | 11.169 | 3.26E-01 | 2.15E-02 | -0.64 | 2.97  |
| <i>lpg1998</i> | histidinol phosphate aminotransferase                                    | <i>hisC2</i> | Amino Acid Metabolism                     | 10.837 | 10.594 | 8.118  | 10.699 | 4.54E-01 | 1.79E-02 | -0.24 | 2.58  |
| <i>lpg1998</i> | histidinol phosphate aminotransferase                                    | <i>hisC2</i> | Amino Acid Metabolism                     | 10.465 | 10.468 | 8.119  | 10.805 | 9.97E-01 | 9.26E-03 | 0.00  | 2.69  |
| <i>lpg1999</i> | pterin 4 alpha carbinolamine dehydratase COG2154                         |              | Named proteins of general function        | 13.306 | 11.774 | 11.063 | 11.518 | 2.25E-01 | 4.25E-01 | -1.53 | 0.45  |
| <i>lpg1999</i> | pterin 4 alpha carbinolamine dehydratase COG2154                         |              | Named proteins of general function        | 13.950 | 11.708 | 10.907 | 11.639 | 6.07E-03 | 2.28E-01 | -2.24 | 0.73  |
| <i>lpg2000</i> | protein export protein SecF (preprotein translocase subu <i>secF</i> )   |              | Protein fate / hydrolases / secretion     | 11.220 | 9.883  | 9.957  | 11.237 | 1.05E-01 | 2.81E-02 | -1.34 | 1.28  |
| <i>lpg2000</i> | protein export protein SecF (preprotein translocase subu <i>secF</i> )   |              | Protein fate / hydrolases / secretion     | 11.351 | 9.977  | 9.520  | 11.386 | 5.38E-02 | 2.57E-02 | -1.37 | 1.87  |
| <i>lpg2001</i> | protein export protein SecD (preprotein translocase subu <i>secD</i> )   |              | Protein fate / hydrolases / secretion     | 12.985 | 12.310 | 10.593 | 13.928 | 5.08E-01 | 6.38E-04 | -0.67 | 3.33  |
| <i>lpg2001</i> | protein export protein SecD (preprotein translocase subu <i>secD</i> )   |              | Protein fate / hydrolases / secretion     | 13.116 | 12.338 | 9.658  | 13.938 | 3.17E-01 | 5.71E-03 | -0.78 | 4.28  |
| <i>lpg2002</i> | transmembrane protein YajC, preprotein translocase sub <i>yajC</i>       |              | Protein fate / hydrolases / secretion     | 11.830 | 11.333 | 10.658 | 12.677 | 3.51E-01 | 1.03E-03 | -0.50 | 2.02  |
| <i>lpg2002</i> | transmembrane protein YajC, preprotein translocase sub <i>yajC</i>       |              | Protein fate / hydrolases / secretion     | 11.708 | 11.486 | 10.604 | 12.691 | 7.13E-01 | 4.38E-04 | -0.22 | 2.09  |
| <i>lpg2003</i> | queuine tRNA-ribosyltransferase                                          | <i>tgt</i>   | DNA/RNA degradation / restriction, Tr     | 10.462 | 9.647  | 8.904  | 9.136  | 7.16E-02 | 8.50E-01 | -0.82 | 0.23  |
| <i>lpg2003</i> | queuine tRNA-ribosyltransferase                                          | <i>tgt</i>   | DNA/RNA degradation / restriction, Tr     | 10.650 | 10.314 | 9.025  | 10.072 | 5.51E-01 | 2.02E-01 | -0.34 | 1.05  |
| <i>lpg2004</i> | S-adenosylmethionine:tRNA ribosyltransferase-isomeras <i>queA</i>        |              | DNA/RNA degradation / restriction, Tr     | 9.488  | 11.006 | 10.517 | 11.028 | 1.14E-01 | 4.91E-01 | 1.52  | 0.51  |
| <i>lpg2004</i> | S-adenosylmethionine:tRNA ribosyltransferase-isomeras <i>queA</i>        |              | DNA/RNA degradation / restriction, Tr     | 10.178 | 11.244 | 10.508 | 11.236 | 1.21E-01 | 1.94E-01 | 1.07  | 0.73  |
| <i>lpg2005</i> | small ORF (137aa)                                                        |              | ORFs of unknown function (unique)         | 11.345 | 10.876 | 10.894 | 9.138  | 2.80E-01 | 3.58E-01 | -0.47 | -1.76 |
| <i>lpg2005</i> | small ORF (137aa)                                                        |              | ORFs of unknown function (unique)         | 11.270 | 10.991 | 11.129 | 10.948 | 5.35E-01 | 6.35E-01 | -0.28 | -0.18 |
| <i>lpg2006</i> | ABC transporter ATP binding protein                                      | <i>uup-A</i> | Transport and binding                     | 9.887  | 10.465 | 9.349  | 11.114 | 2.30E-01 | 7.72E-03 | 0.58  | 1.76  |
| <i>lpg2006</i> | ABC transporter ATP binding protein                                      | <i>uup-A</i> | Transport and binding                     | 9.956  | 10.602 | 9.289  | 11.355 | 1.21E-01 | 4.82E-03 | 0.65  | 2.07  |
| <i>lpg2007</i> | aspartyl protease                                                        |              | Protein fate / hydrolases / secretion     | 11.839 | 10.156 | 11.175 | 12.753 | 1.95E-02 | 2.59E-03 | -1.68 | 1.58  |
| <i>lpg2007</i> | aspartyl protease                                                        |              | Protein fate / hydrolases / secretion     | 11.715 | 10.981 | 11.094 | 12.890 | 2.09E-01 | 1.07E-03 | -0.73 | 1.80  |
| <i>lpg2008</i> | endoribonuclease L-PSP (translation initiation inhibitor)                |              | DNA/RNA degradation / restriction, Si     | 11.403 | 10.732 | 11.203 | 12.855 | 4.91E-02 | 6.95E-04 | -0.67 | 1.65  |
| <i>lpg2008</i> | endoribonuclease L-PSP (translation initiation inhibitor)                |              | DNA/RNA degradation / restriction, Si     | 11.394 | 10.695 | 11.036 | 12.890 | 7.70E-02 | 2.69E-04 | -0.70 | 1.85  |
| <i>lpg2009</i> | guanosine-3,5-bis(diphosphate)-3-pyrophosphohydrolase <i>spoT</i>        |              | Nucleotide Metabolism                     | 11.081 | 10.096 | 11.274 | 10.924 | 6.92E-02 | 2.44E-01 | -0.98 | -0.35 |
| <i>lpg2009</i> | guanosine-3,5-bis(diphosphate)-3-pyrophosphohydrolase <i>spoT</i>        |              | Nucleotide Metabolism                     | 11.028 | 11.149 | 11.329 | 11.682 | 8.46E-01 | 4.82E-01 | 0.12  | 0.35  |
| <i>lpg2010</i> | guanylate kinase                                                         | <i>gmk</i>   | Nucleotide Metabolism                     | 12.330 | 11.348 | 12.473 | 12.250 | 3.69E-03 | 1.40E-01 | -0.98 | -0.22 |
| <i>lpg2010</i> | guanylate kinase                                                         | <i>gmk</i>   | Nucleotide Metabolism                     | 12.329 | 11.458 | 12.483 | 12.275 | 2.73E-02 | 1.77E-01 | -0.87 | -0.21 |
| <i>lpg2011</i> | stress-induced protein                                                   |              | Detoxification / adaptation               | 11.153 | 11.172 | 11.040 | 12.393 | 9.32E-01 | 1.25E-02 | 0.02  | 1.35  |
| <i>lpg2011</i> | stress-induced protein                                                   |              | Detoxification / adaptation               | 10.986 | 11.192 | 10.798 | 12.336 | 4.52E-01 | 1.65E-02 | 0.21  | 1.54  |
| <i>lpg2012</i> | ribonuclease PH (RNase PH)                                               | <i>rph</i>   | DNA/RNA degradation / restriction, Tr     | 11.947 | 12.560 | 10.959 | 13.042 | 8.98E-02 | 8.41E-06 | 0.61  | 2.08  |
| <i>lpg2012</i> | ribonuclease PH (RNase PH)                                               | <i>rph</i>   | DNA/RNA degradation / restriction, Tr     | 11.829 | 12.585 | 10.797 | 13.024 | 7.69E-02 | 1.73E-05 | 0.76  | 2.23  |
| <i>lpg2013</i> | twitching motility protein (pilin biogenesis protein PilT)               | <i>pilT</i>  | Transport and binding                     | 11.770 | 12.160 | 11.921 | 11.906 | 6.20E-02 | 9.60E-01 | 0.39  | -0.02 |
| <i>lpg2013</i> | twitching motility protein (pilin biogenesis protein PilT)               | <i>pilT</i>  | Transport and binding                     | 11.912 | 12.044 | 11.923 | 11.978 | 6.10E-01 | 8.58E-01 | 0.13  | 0.06  |
| <i>lpg2014</i> | pyridoxal-5'-phosphate dependent enzyme family (may have various)        |              | Named proteins of general function        | 10.293 | 10.943 | 9.690  | 10.946 | 1.55E-01 | 1.13E-01 | 0.65  | 1.26  |
| <i>lpg2014</i> | pyridoxal-5'-phosphate dependent enzyme family (may have various)        |              | Named proteins of general function        | 9.868  | 11.174 | 9.842  | 11.180 | 5.22E-02 | 2.67E-02 | 1.31  | 1.34  |
| <i>lpg2015</i> | pyrroline-5-carboxylate reductase (delta-1-pyrroline-5-cai <i>proC</i> ) |              | Amino Acid Metabolism                     | 9.543  | 10.827 | 9.676  | 10.400 | 8.59E-03 | 1.67E-02 | 1.28  | 0.72  |
| <i>lpg2015</i> | pyrroline-5-carboxylate reductase (delta-1-pyrroline-5-cai <i>proC</i> ) |              | Amino Acid Metabolism                     | 9.822  | 10.956 | 9.482  | 10.653 | 4.97E-02 | 5.34E-02 | 1.13  | 1.17  |
| <i>lpg2016</i> | hypothetical (YGGT family protein) (transmembrane protein)               |              | Named proteins of general function        | 12.262 | 12.697 | 10.523 | 12.651 | 4.66E-02 | 2.74E-04 | 0.43  | 2.13  |
| <i>lpg2016</i> | hypothetical (YGGT family protein) (transmembrane protein)               |              | Named proteins of general function        | 12.329 | 12.848 | 10.194 | 12.736 | 1.57E-02 | 3.23E-03 | 0.52  | 2.54  |
| <i>lpg2017</i> | ORF                                                                      |              | ORFs of unknown function (unique)         | 9.347  | 9.168  | 11.582 | 9.323  | 7.67E-01 | 1.82E-04 | -0.18 | -2.26 |
| <i>lpg2017</i> | ORF                                                                      |              | ORFs of unknown function (unique)         | 9.102  | 9.153  | 11.116 | 8.948  | 8.53E-01 | 9.60E-04 | 0.05  | -2.17 |
| <i>lpg2018</i> | hypothetical protein                                                     |              | Unknown / hypothetical proteins           | 12.432 | 10.842 | 13.214 | 11.071 | 7.65E-04 | 3.98E-05 | -1.59 | -2.14 |
| <i>lpg2018</i> | hypothetical protein                                                     |              | Unknown / hypothetical proteins           | 12.429 | 10.972 | 13.136 | 11.565 | 1.37E-03 | 1.12E-04 | -1.46 | -1.57 |
| <i>lpg2019</i> | serine metalloprotease (alkaline?) (acidic protease?)                    |              | Protein fate / hydrolases / secretion     | 11.292 | 12.830 | 11.328 | 11.371 | 5.24E-06 | 8.01E-01 | 1.54  | 0.04  |
| <i>lpg2019</i> | serine metalloprotease (alkaline?) (acidic protease?)                    |              | Protein fate / hydrolases / secretion     | 11.207 | 12.902 | 11.261 | 11.454 | 2.65E-05 | 3.06E-01 | 1.69  | 0.19  |
| <i>lpg2020</i> | transcriptional regulator OruR, AraC family                              | <i>oruR</i>  | Transcription factors / DNA binding prc   | 10.404 | 9.089  | 9.646  | 8.637  | 1.54E-02 | 1.84E-02 | -1.32 | -1.01 |
| <i>lpg2020</i> | transcriptional regulator OruR, AraC family                              | <i>oruR</i>  | Transcription factors / DNA binding prc   | 10.481 | 8.626  | 9.556  | 8.852  | 3.46E-02 | 3.38E-01 | -1.85 | -0.70 |
| <i>lpg2021</i> | adenosylhomocysteinase                                                   | <i>ahcY</i>  | Amino Acid Metabolism, Metabolism o       | 12.601 | 11.313 | 12.368 | 11.545 | 9.73E-04 | 3.94E-04 | -1.29 | -0.82 |
| <i>lpg2021</i> | adenosylhomocysteinase                                                   | <i>ahcY</i>  | Amino Acid Metabolism, Metabolism o       | 12.579 | 11.932 | 12.367 | 12.080 | 3.54E-01 | 6.86E-01 | -0.65 | -0.29 |
| <i>lpg2022</i> | S-adenosylmethionine synthetase                                          | <i>metK</i>  | Amino Acid Metabolism, Metabolism o       | 12.963 | 12.436 | 11.610 | 12.976 | 2.47E-01 | 2.25E-02 | -0.53 | 1.37  |
| <i>lpg2022</i> | S-adenosylmethionine synthetase                                          | <i>metK</i>  | Amino Acid Metabolism, Metabolism o       | 12.889 | 12.401 | 11.631 | 12.998 | 3.47E-01 | 1.93E-02 | -0.49 | 1.37  |
| <i>lpg2023</i> | carbamoyl phosphate synthase, small subunit                              |              | Nucleotide Metabolism, Amino Acid M       | 12.547 | 12.433 | 10.931 | 12.117 | 7.09E-01 | 2.79E-01 | -0.11 | 1.19  |
| <i>lpg2023</i> | carbamoyl phosphate synthase, small subunit                              |              | Nucleotide Metabolism, Amino Acid M       | 12.491 | 12.269 | 10.828 | 13.004 | 5.59E-01 | 9.49E-03 | -0.22 | 2.18  |
| <i>lpg2024</i> | heat shock protein DnaJ, chaperone protein                               | <i>dnaJ</i>  | Detoxification / adaptation, Protein fate | 10.004 | 10.786 | 10.196 | 10.747 | 3.97E-02 | 1.94E-01 | 0.78  | 0.55  |
| <i>lpg2024</i> | heat shock protein DnaJ, chaperone protein                               | <i>dnaJ</i>  | Detoxification / adaptation, Protein fate | 9.581  | 11.524 | 10.275 | 11.536 | 8.97E-03 | 4.28E-02 | 1.94  | 1.26  |
| <i>lpg2025</i> | chaperone protein DnaK, heat shock protein Hsp70                         | <i>dnaK</i>  | Detoxification / adaptation, Protein fate | 11.782 | 11.164 | 12.578 | 11.862 | 2.02E-01 | 2.43E-01 | -0.62 | -0.72 |
| <i>lpg2025</i> | chaperone protein DnaK, heat shock protein Hsp70                         | <i>dnaK</i>  | Detoxification / adaptation, Protein fate | 11.811 | 11.439 | 12.569 | 12.097 | 3.34E-01 | 2.91E-01 | -0.37 | -0.47 |
| <i>lpg2026</i> | heat shock protein GrpE                                                  | <i>grpE</i>  | Detoxification / adaptation, Protein fate | 11.704 | 11.800 | 11.894 | 12.876 | 8.51E-01 | 1.21E-02 | 0.10  | 0.98  |
| <i>lpg2026</i> | heat shock protein GrpE                                                  | <i>grpE</i>  | Detoxification / adaptation, Protein fate | 11.656 | 11.320 | 11.844 | 12.884 | 5.14E-01 | 1.18E-02 | -0.34 | 1.04  |
| <i>lpg2027</i> | 2-keto-3-deoxy-D-arabino-heptulosonate 7-phosphate sy <i>dhs1</i>        |              | Amino Acid Metabolism                     | 12.757 | 12.757 | 11.931 | 12.966 | 9.99E-01 | 5.78E-04 | 0.00  | 1.03  |
| <i>lpg2027</i> | 2-keto-3-deoxy-D-arabino-heptulosonate 7-phosphate sy <i>dhs1</i>        |              | Amino Acid Metabolism                     | 12.798 | 12.835 | 11.864 | 12.956 | 8.29E-01 | 1.45E-03 | 0.04  | 1.09  |

|                |                                                                         |             |                                            |        |        |        |        |          |          |       |       |
|----------------|-------------------------------------------------------------------------|-------------|--------------------------------------------|--------|--------|--------|--------|----------|----------|-------|-------|
| <i>lpg2028</i> | uroporphyrinogen decarboxylase                                          | <i>hemE</i> | Metabolism of Cofactors and Vitamins       | 11.290 | 11.487 | 11.384 | 12.091 | 5.33E-01 | 5.21E-02 | 0.20  | 0.71  |
| <i>lpg2028</i> | uroporphyrinogen decarboxylase                                          | <i>hemE</i> | Metabolism of Cofactors and Vitamins       | 11.084 | 11.467 | 11.194 | 12.140 | 2.84E-01 | 1.21E-02 | 0.38  | 0.95  |
| <i>lpg2029</i> | dihydroneopterin aldolase FolB, kinase? COG1539                         |             | Metabolism of Cofactors and Vitamins       | 8.740  | 10.766 | 8.838  | 9.766  | 1.81E-03 | 1.30E-02 | 2.03  | 0.93  |
| <i>lpg2029</i> | dihydroneopterin aldolase FolB, kinase? COG1539                         |             | Metabolism of Cofactors and Vitamins       | 9.298  | 9.983  | 6.676  | 8.694  | 1.97E-01 | 2.00E-01 | 0.69  | 2.02  |
| <i>lpg2030</i> | conserved hypothetical protein                                          |             | Unknown / hypothetical proteins            | 11.307 | 12.606 | 11.591 | 11.263 | 4.19E-03 | 2.32E-02 | 1.30  | -0.33 |
| <i>lpg2030</i> | conserved hypothetical protein                                          |             | Unknown / hypothetical proteins            | 11.192 | 12.850 | 11.584 | 11.265 | 2.65E-03 | 1.06E-01 | 1.66  | -0.32 |
| <i>lpg2031</i> | arginyl tRNA synthetase                                                 | <i>argS</i> | Amino Acid Metabolism, Translation         | 11.617 | 12.226 | 10.382 | 12.583 | 1.13E-01 | 5.85E-04 | 0.61  | 2.20  |
| <i>lpg2031</i> | arginyl tRNA synthetase                                                 | <i>argS</i> | Amino Acid Metabolism, Translation         | 11.352 | 12.257 | 9.805  | 12.641 | 9.66E-02 | 3.02E-04 | 0.91  | 2.84  |
| <i>lpg2032</i> | transporter, permease (integral membrane protein)                       |             | Transport and binding                      | 11.026 | 10.684 | 10.399 | 10.320 | 8.31E-01 | 8.75E-01 | -0.34 | -0.08 |
| <i>lpg2032</i> | transporter, permease (integral membrane protein)                       |             | Transport and binding                      | 11.284 | 11.998 | 10.270 | 10.300 | 1.07E-01 | 9.45E-01 | 0.71  | 0.03  |
| <i>lpg2033</i> | ATP dependent DNA helicase RecG                                         | <i>recG</i> | Replication and Repair                     | 10.467 | 8.670  | 9.148  | 9.253  | 5.34E-03 | 8.54E-01 | -1.80 | 0.11  |
| <i>lpg2033</i> | ATP dependent DNA helicase RecG                                         | <i>recG</i> | Replication and Repair                     | 10.028 | 8.727  | 8.142  | 9.262  | 7.44E-02 | 3.44E-01 | -1.30 | 1.12  |
| <i>lpg2034</i> | cation efflux family protein (cobalt-zinc-cadmium resistance protein C) |             | Transport and binding                      | 10.069 | 9.470  | 9.190  | 9.759  | 3.56E-01 | 4.26E-01 | -0.60 | 0.57  |
| <i>lpg2034</i> | cation efflux family protein (cobalt-zinc-cadmium resistance protein C) |             | Transport and binding                      | 9.648  | 9.351  | 8.184  | 10.489 | 7.98E-01 | 3.78E-02 | -0.30 | 2.30  |
| <i>lpg2035</i> | transporter, Zip family (solute carrier; Fe(II) transporter)            |             | Transport and binding                      | 10.621 | 10.274 | 9.788  | 10.370 | 4.49E-01 | 1.10E-01 | -0.35 | 0.58  |
| <i>lpg2035</i> | transporter, Zip family (solute carrier; Fe(II) transporter)            |             | Transport and binding                      | 10.961 | 10.506 | 9.523  | 10.643 | 2.59E-01 | 2.23E-02 | -0.45 | 1.12  |
| <i>lpg2036</i> | Maf-like protein (septum formation) (nucleotide binding protein)        |             | Chemotaxis / motility / cell division, Trz | 11.580 | 9.035  | 9.438  | 9.399  | 3.07E-04 | 9.75E-01 | -2.55 | -0.04 |
| <i>lpg2036</i> | Maf-like protein (septum formation) (nucleotide binding protein)        |             | Chemotaxis / motility / cell division, Trz | 11.626 | 8.601  | 9.041  | 9.594  | 8.65E-05 | 5.97E-01 | -3.02 | 0.55  |
| <i>lpg2037</i> | enolase                                                                 | <i>eno</i>  | Carbohydrate Metabolism, Amino Acid        | 11.438 | 10.345 | 9.763  | 10.845 | 5.64E-02 | 3.86E-02 | -1.09 | 1.08  |
| <i>lpg2037</i> | enolase                                                                 | <i>eno</i>  | Carbohydrate Metabolism, Amino Acid        | 11.479 | 10.450 | 9.437  | 10.627 | 4.31E-02 | 1.37E-01 | -1.03 | 1.19  |
| <i>lpg2038</i> | transmembrane protein (septum formation initiator?)                     |             | Chemotaxis / motility / cell division      | 10.222 | 10.476 | 10.784 | 9.564  | 5.87E-01 | 4.11E-02 | 0.25  | -1.22 |
| <i>lpg2038</i> | transmembrane protein (septum formation initiator?)                     |             | Chemotaxis / motility / cell division      | 10.244 | 10.196 | 10.626 | 9.889  | 9.35E-01 | 1.59E-01 | -0.05 | -0.74 |
| <i>lpg2039</i> | putative mevalonate kinase                                              |             | Lipid Metabolism                           | 11.591 | 10.258 | 11.662 | 11.356 | 7.75E-03 | 1.41E-01 | -1.33 | -0.31 |
| <i>lpg2039</i> | putative mevalonate kinase                                              |             | Lipid Metabolism                           | 11.314 | 10.706 | 11.678 | 11.427 | 1.85E-01 | 2.27E-01 | -0.61 | -0.25 |
| <i>lpg2040</i> | mevalonate diphosphate decarboxylase (diphosphomevalonate decal         |             | Lipid Metabolism                           | 12.559 | 11.373 | 11.995 | 11.957 | 3.46E-04 | 8.13E-01 | -1.19 | -0.04 |
| <i>lpg2040</i> | mevalonate diphosphate decarboxylase (diphosphomevalonate decal         |             | Lipid Metabolism                           | 12.227 | 11.311 | 11.905 | 11.941 | 1.50E-02 | 8.51E-01 | -0.92 | 0.04  |
| <i>lpg2041</i> | radical activating enzyme (radical SAM domain protein)                  |             | Named proteins of general function         | 12.420 | 11.183 | 10.479 | 11.691 | 1.76E-03 | 3.48E-02 | -1.24 | 1.21  |
| <i>lpg2041</i> | radical activating enzyme (radical SAM domain protein)                  |             | Named proteins of general function         | 12.411 | 11.142 | 10.412 | 11.718 | 7.47E-04 | 2.14E-02 | -1.27 | 1.31  |
| <i>lpg2042</i> | outer membrane protein (34 kDa), TPR repeat                             |             | Toxin production / other pathogen func     | 13.308 | 13.818 | 11.691 | 13.385 | 3.61E-01 | 3.39E-03 | 0.51  | 1.69  |
| <i>lpg2042</i> | outer membrane protein (34 kDa), TPR repeat                             |             | Toxin production / other pathogen func     | 13.383 | 13.781 | 11.549 | 13.399 | 4.42E-01 | 1.60E-03 | 0.40  | 1.85  |
| <i>lpg2043</i> | peptidoglycan associated lipoprotein                                    |             | Named proteins of general function         | 13.879 | 14.832 | 12.500 | 14.037 | 1.25E-01 | 6.53E-03 | 0.95  | 1.54  |
| <i>lpg2043</i> | peptidoglycan associated lipoprotein                                    |             | Named proteins of general function         | 13.926 | 14.941 | 12.514 | 14.108 | 1.30E-01 | 6.53E-03 | 1.02  | 1.59  |
| <i>lpg2044</i> | conserved domain protein                                                |             | Unknown / hypothetical proteins            | 11.131 | 10.685 | 11.582 | 11.067 | 4.38E-01 | 2.37E-01 | -0.45 | -0.51 |
| <i>lpg2044</i> | conserved domain protein                                                |             | Unknown / hypothetical proteins            | 11.003 | 11.447 | 11.934 | 11.815 | 8.03E-02 | 6.60E-01 | 0.44  | -0.12 |
| <i>lpg2045</i> | ABC transport system periplasmic substrate binding protein              |             | Transport and binding                      | 12.199 | 12.117 | 11.259 | 11.990 | 7.09E-01 | 1.05E-02 | -0.08 | 0.73  |
| <i>lpg2045</i> | ABC transport system periplasmic substrate binding protein              |             | Transport and binding                      | 12.175 | 12.173 | 11.235 | 11.999 | 9.92E-01 | 3.04E-03 | 0.00  | 0.76  |
| <i>lpg2046</i> | ABC transporter, ATP binding protein                                    |             | Transport and binding                      | 11.855 | 12.052 | 10.510 | 12.565 | 4.54E-01 | 4.34E-06 | 0.20  | 2.06  |
| <i>lpg2046</i> | ABC transporter, ATP binding protein                                    |             | Transport and binding                      | 11.786 | 12.395 | 10.437 | 12.576 | 1.76E-01 | 2.06E-05 | 0.61  | 2.14  |
| <i>lpg2047</i> | ABC transporter, permease                                               |             | Transport and binding                      | 11.545 | 11.229 | 10.278 | 11.266 | 3.12E-01 | 3.77E-03 | -0.32 | 0.99  |
| <i>lpg2047</i> | ABC transporter, permease                                               |             | Transport and binding                      | 11.435 | 11.188 | 9.796  | 11.078 | 4.73E-01 | 4.21E-03 | -0.25 | 1.28  |
| <i>lpg2048</i> | ORF                                                                     |             | ORFs of unknown function (unique)          | 9.716  | 9.465  | 10.929 | 10.323 | 5.97E-01 | 1.91E-01 | -0.25 | -0.61 |
| <i>lpg2048</i> | ORF                                                                     |             | ORFs of unknown function (unique)          | 9.832  | 9.315  | 10.787 | 10.379 | 3.87E-01 | 2.05E-01 | -0.52 | -0.41 |
| <i>lpg2049</i> | small ORF (99aa)                                                        |             | ORFs of unknown function (unique)          | 8.593  | 7.989  | 10.971 | 8.584  | 5.70E-01 | 8.68E-03 | -0.60 | -2.39 |
| <i>lpg2049</i> | small ORF (99aa)                                                        |             | ORFs of unknown function (unique)          | 9.615  | 9.238  | 11.062 | 9.917  | 7.22E-01 | 2.12E-01 | -0.38 | -1.15 |
| <i>lpg2050</i> | ORF                                                                     |             | ORFs of unknown function (unique)          | 9.657  | 10.414 | 8.820  | 8.554  | 4.87E-03 | 7.29E-01 | 0.76  | -0.27 |
| <i>lpg2050</i> | ORF                                                                     |             | ORFs of unknown function (unique)          | 9.307  | 9.911  | 8.978  | 9.103  | 2.11E-01 | 7.81E-01 | 0.60  | 0.12  |
| <i>lpg2051</i> | isopentenyl-diphosphate delta-isomerase (IPP isomerase) (carotenoid     |             | Lipid Metabolism, Biosynthesis of Sec      | 11.040 | 11.511 | 8.989  | 11.589 | 2.83E-01 | 9.97E-04 | 0.47  | 2.60  |
| <i>lpg2051</i> | isopentenyl-diphosphate delta-isomerase (IPP isomerase) (carotenoid     |             | Lipid Metabolism, Biosynthesis of Sec      | 10.839 | 11.751 | 9.313  | 12.017 | 4.56E-02 | 1.64E-04 | 0.91  | 2.70  |
| <i>lpg2052</i> | hydroxymethylglutaryl CoA reductase (3-hydroxy-3-methylglutaryl-co      |             | Lipid Metabolism                           | 12.014 | 11.677 | 10.561 | 11.700 | 3.24E-01 | 1.42E-02 | -0.34 | 1.14  |
| <i>lpg2052</i> | hydroxymethylglutaryl CoA reductase (3-hydroxy-3-methylglutaryl-co      |             | Lipid Metabolism                           | 12.076 | 11.671 | 10.382 | 11.523 | 2.32E-01 | 1.79E-02 | -0.40 | 1.14  |
| <i>lpg2053</i> | ORF                                                                     |             | ORFs of unknown function (unique)          | 9.878  | 8.992  | 9.403  | 9.916  | 1.17E-02 | 1.47E-01 | -0.89 | 0.51  |
| <i>lpg2053</i> | ORF                                                                     |             | ORFs of unknown function (unique)          | 10.237 | 9.357  | 9.495  | 10.209 | 8.53E-02 | 3.87E-02 | -0.88 | 0.71  |
| <i>lpg2054</i> | tRNA-Lys                                                                |             | tRNA                                       | 13.099 | 12.944 | 12.357 | 14.825 | 7.93E-01 | 7.41E-05 | -0.16 | 2.47  |
| <i>lpg2054</i> | tRNA-Lys                                                                |             | tRNA                                       | 13.085 | 12.934 | 12.323 | 14.842 | 7.92E-01 | 1.37E-04 | -0.15 | 2.52  |
| <i>lpg2056</i> | tRNA-Arg                                                                |             | tRNA                                       | 8.843  | 8.120  | 8.528  | 7.388  | 2.90E-01 | 3.16E-01 | -0.72 | -1.14 |
| <i>lpg2056</i> | tRNA-Arg                                                                |             | tRNA                                       | 8.035  | 7.984  | 8.105  | 8.599  | 9.64E-01 | 5.69E-01 | -0.05 | 0.49  |
| <i>lpg2057</i> | Prophage dip12 integrase (prophage qsr integrase)                       | <i>intD</i> | Viral functions / Phage / Transposases     | 9.921  | 9.011  | 11.671 | 9.546  | 8.29E-02 | 1.90E-04 | -0.91 | -2.12 |
| <i>lpg2057</i> | Prophage dip12 integrase (prophage qsr integrase)                       | <i>intD</i> | Viral functions / Phage / Transposases     | 9.865  | 8.868  | 11.564 | 9.842  | 4.19E-02 | 4.10E-04 | -1.00 | -1.72 |
| <i>lpg2058</i> | hypothetical                                                            |             | Unknown / hypothetical proteins            | 6.784  | 7.329  | 7.032  | 6.887  | 5.48E-01 | 8.60E-01 | 0.55  | -0.15 |
| <i>lpg2058</i> | hypothetical                                                            |             | Unknown / hypothetical proteins            | 8.091  | 9.528  | 7.595  | 10.109 | 1.80E-01 | 7.03E-02 | 1.44  | 2.51  |
| <i>lpg2059</i> | hypothetical (phage repressor) (putative regulator)                     |             | Transcription factors / DNA binding prc    | 9.030  | 9.235  | 10.466 | 8.674  | 4.16E-01 | 1.66E-02 | 0.21  | -1.79 |
| <i>lpg2059</i> | hypothetical (phage repressor) (putative regulator)                     |             | Transcription factors / DNA binding prc    | 9.139  | 9.042  | 10.431 | 9.257  | 7.35E-01 | 9.30E-03 | -0.10 | -1.17 |
| <i>lpg2060</i> | ORF                                                                     |             | ORFs of unknown function (unique)          | 7.961  | 8.683  | 9.784  | 7.969  | 4.30E-01 | 6.47E-02 | 0.72  | -1.81 |
| <i>lpg2060</i> | ORF                                                                     |             | ORFs of unknown function (unique)          | 8.023  | 7.993  | 8.973  | 7.974  | 9.80E-01 | 3.71E-01 | -0.03 | -1.00 |



|                |                                                                         |            |                                          |        |        |        |        |          |          |       |       |
|----------------|-------------------------------------------------------------------------|------------|------------------------------------------|--------|--------|--------|--------|----------|----------|-------|-------|
| <i>lpg2061</i> | major facilitator family transporter                                    |            | Transport and binding                    | 8.209  | 8.441  | 9.179  | 8.738  | 8.08E-01 | 6.23E-01 | 0.23  | -0.44 |
| <i>lpg2061</i> | major facilitator family transporter                                    |            | Transport and binding                    | 7.680  | 9.473  | 9.122  | 9.218  | 1.22E-01 | 8.87E-01 | 1.79  | 0.10  |
| <i>lpg2062</i> | methylase                                                               |            | Named proteins of general function       | 8.141  | 7.932  | 9.170  | 8.109  | 8.53E-01 | 2.69E-01 | -0.21 | -1.06 |
| <i>lpg2062</i> | methylase                                                               |            | Named proteins of general function       | 7.607  | 7.840  | 9.049  | 8.998  | 8.40E-01 | 9.66E-01 | 0.23  | -0.05 |
| <i>lpg2063</i> | ABC transporter, ATP binding transmembrane protein                      |            | Transport and binding                    | 9.767  | 7.486  | 7.284  | 5.437  | 3.57E-01 | 1.66E-01 | -2.28 | -1.85 |
| <i>lpg2063</i> | ABC transporter, ATP binding transmembrane protein                      |            | Transport and binding                    |        | 6.574  | 7.649  | 6.568  |          | 1.33E-01 |       | -1.08 |
| <i>lpg2064</i> | ATP-binding transmembrane ABC transporter (ABC transporter ATP t        |            | Transport and binding                    | 7.881  | 7.639  | 8.082  | 6.890  | 8.90E-01 | 2.50E-01 | -0.24 | -1.19 |
| <i>lpg2064</i> | ATP-binding transmembrane ABC transporter (ABC transporter ATP t        |            | Transport and binding                    | 7.268  | 7.353  | 8.709  | 7.699  | 9.51E-01 | 1.49E-01 | 0.09  | -1.01 |
| <i>lpg2065</i> | D-xylose reductase III (aldo/keto reudctase family) ( 2,5-diketo-D-gluc |            | Carbohydrate Metabolism, Lipid Metab     | 7.640  | 7.201  | 9.202  | 7.285  | 5.45E-01 | 3.79E-02 | -0.44 | -1.92 |
| <i>lpg2065</i> | D-xylose reductase III (aldo/keto reudctase family) ( 2,5-diketo-D-gluc |            | Carbohydrate Metabolism, Lipid Metab     | 7.874  | 8.421  | 8.567  | 7.609  | 2.23E-01 | 3.58E-01 | 0.55  | -0.96 |
| <i>lpg2066</i> | acetyltransferase, GNAT family COG1670                                  |            | Named proteins of general function       | 7.235  | 3.572  | 9.006  | 7.629  | 4.52E-01 | 5.80E-01 | -3.66 | -1.38 |
| <i>lpg2066</i> | acetyltransferase, GNAT family COG1670                                  |            | Named proteins of general function       | 7.187  | 10.375 | 7.313  | 8.217  | 1.52E-01 | 6.48E-01 | 3.19  | 0.90  |
| <i>lpg2067</i> | ORF hypothetical                                                        |            | Unknown / hypothetical proteins          | 8.478  | 7.943  | 9.302  | 7.634  | 4.18E-01 | 1.70E-02 | -0.54 | -1.67 |
| <i>lpg2067</i> | ORF hypothetical                                                        |            | Unknown / hypothetical proteins          | 8.525  | 7.175  | 9.200  | 8.333  | 4.65E-02 | 1.18E-01 | -1.35 | -0.87 |
| <i>lpg2068</i> | MazG (nucleoside triphosphate pyrophosphohydrolase)                     |            | Named proteins of general function       | 7.608  | 7.514  | 10.234 | 8.294  | 9.34E-01 | 1.17E-02 | -0.09 | -1.94 |
| <i>lpg2068</i> | MazG (nucleoside triphosphate pyrophosphohydrolase)                     |            | Named proteins of general function       | 6.701  | 7.046  | 8.774  | 9.280  | 8.57E-01 | 6.38E-01 | 0.35  | 0.51  |
| <i>lpg2069</i> | transposase Tn5                                                         |            | Viral functions / Phage / Transposases   | 7.011  | 7.508  | 7.066  | 5.987  | 7.46E-01 | 6.27E-01 | 0.50  | -1.08 |
| <i>lpg2069</i> | transposase Tn5                                                         |            | Viral functions / Phage / Transposases   | 7.255  | 6.151  | 7.430  | 6.405  | 3.60E-01 | 5.10E-01 | -1.10 | -1.02 |
| <i>lpg2070</i> | reverse transcriptase                                                   |            | Viral functions / Phage / Transposases   | 7.651  | 7.876  | 7.753  | 8.041  | 8.16E-01 | 8.37E-01 | 0.23  | 0.29  |
| <i>lpg2070</i> | reverse transcriptase                                                   |            | Viral functions / Phage / Transposases   | 6.640  | 7.798  | 8.070  | 8.564  | 4.54E-01 | 5.76E-01 | 1.16  | 0.49  |
| <i>lpg2071</i> | hypothetical                                                            |            | Unknown / hypothetical proteins          | 8.665  | 8.976  | 10.152 | 7.143  | 4.01E-01 | 3.98E-02 | 0.31  | -3.01 |
| <i>lpg2071</i> | hypothetical                                                            |            | Unknown / hypothetical proteins          | 8.583  | 8.680  | 9.878  | 7.945  | 8.68E-01 | 1.43E-01 | 0.10  | -1.93 |
| <i>lpg2072</i> | hypothetical                                                            |            | Unknown / hypothetical proteins          | 6.568  | 8.356  | 7.768  | 7.451  | 8.27E-02 | 7.27E-01 | 1.79  | -0.32 |
| <i>lpg2072</i> | hypothetical                                                            |            | Unknown / hypothetical proteins          | 6.814  | 9.414  | 8.343  | 9.041  | 6.89E-02 | 3.85E-01 | 2.60  | 0.70  |
| <i>lpg2073</i> | ORF                                                                     |            | ORFs of unknown function (unique)        | 6.635  | 7.474  | 6.841  | 7.459  | 3.14E-01 | 7.04E-01 | 0.84  | 0.62  |
| <i>lpg2073</i> | ORF                                                                     |            | ORFs of unknown function (unique)        | 5.696  | 8.200  | 7.016  | 10.084 | 2.76E-01 | 7.91E-02 | 2.50  | 3.07  |
| <i>lpg2074</i> | hypothetical (DNA adenine methylase?)                                   |            | Unknown / hypothetical proteins          | 6.326  | 8.397  | 7.677  | 7.530  | 4.88E-01 | 9.31E-01 | 2.07  | -0.15 |
| <i>lpg2074</i> | hypothetical (DNA adenine methylase?)                                   |            | Unknown / hypothetical proteins          | 6.782  | 5.637  | 7.253  | 8.458  | 4.65E-01 | 4.95E-01 | -1.15 | 1.20  |
| <i>lpg2075</i> | DNA adenine methylase                                                   | <i>dam</i> | DNA/RNA degradation / restriction        | 7.447  | 7.890  | 7.356  | 7.258  | 7.26E-01 | 9.40E-01 | 0.44  | -0.10 |
| <i>lpg2075</i> | DNA adenine methylase                                                   | <i>dam</i> | DNA/RNA degradation / restriction        | 6.519  | 7.608  | 6.895  | 7.905  | 3.47E-01 | 4.47E-01 | 1.09  | 1.01  |
| <i>lpg2076</i> | hypothetical                                                            |            | Unknown / hypothetical proteins          | 8.406  | 8.296  | 7.541  | 7.652  | 8.55E-01 | 9.33E-01 | -0.11 | 0.11  |
| <i>lpg2076</i> | hypothetical                                                            |            | Unknown / hypothetical proteins          | 7.924  | 8.525  | 7.421  | 7.904  | 3.39E-01 | 7.39E-01 | 0.60  | 0.48  |
| <i>lpg2077</i> | Tral (mobilization protein, DNA helicase) (TrwC)                        |            | Transport and binding, DNA/RNA degr      | 10.014 | 8.390  | 8.917  | 7.506  | 6.01E-02 | 2.74E-01 | -1.62 | -1.41 |
| <i>lpg2077</i> | Tral (mobilization protein, DNA helicase) (TrwC)                        |            | Transport and binding, DNA/RNA degr      | 9.909  | 8.870  | 9.219  | 8.895  | 3.71E-02 | 7.07E-01 | -1.04 | -0.32 |
| <i>lpg2078</i> | TrAD (conjugal DNA metabolism) (bacterial conjugative coupling prote    |            | Transport and binding                    | 9.634  | 9.404  | 9.347  | 8.913  | 5.17E-01 | 5.33E-01 | -0.23 | -0.43 |
| <i>lpg2078</i> | TrAD (conjugal DNA metabolism) (bacterial conjugative coupling prote    |            | Transport and binding                    | 9.851  | 9.752  | 9.426  | 9.140  | 8.19E-01 | 7.23E-01 | -0.10 | -0.29 |
| <i>lpg2079</i> | TraG (mating pair stabilization and pilus assembly proteir <i>traG</i>  |            | Transport and binding                    | 9.547  | 5.772  | 9.856  | 7.752  | 4.89E-02 | 1.51E-02 | -3.77 | -2.10 |
| <i>lpg2079</i> | TraG (mating pair stabilization and pilus assembly proteir <i>traG</i>  |            | Transport and binding                    | 8.519  | 7.972  | 9.670  | 7.916  | 9.04E-02 | 6.33E-03 | -0.55 | -1.75 |
| <i>lpg2080</i> | TraH (pilus assembly protein) (conjugative transfer: asse <i>traH</i>   |            | Transport and binding                    | 6.876  | 8.896  | 7.261  | 8.525  | 1.45E-01 | 1.84E-01 | 2.02  | 1.26  |
| <i>lpg2080</i> | TraH (pilus assembly protein) (conjugative transfer: asse <i>traH</i>   |            | Transport and binding                    | 5.464  | 7.749  | 6.897  | 8.264  | 3.79E-01 | 1.89E-01 | 2.28  | 1.37  |
| <i>lpg2081</i> | sex pilus assembly TraF (conjugative transfer: assembly) <i>traF</i>    |            | Transport and binding, Viral functions / | 8.270  | 8.401  | 9.428  | 8.066  | 8.47E-01 | 8.15E-02 | 0.13  | -1.36 |
| <i>lpg2081</i> | sex pilus assembly TraF (conjugative transfer: assembly) <i>traF</i>    |            | Transport and binding, Viral functions / | 9.236  | 9.201  | 10.309 | 9.201  | 9.33E-01 | 3.05E-02 | -0.03 | -1.11 |
| <i>lpg2082</i> | small ORF (57aa) sex pilus assembly TraF (conjugative t <i>traF</i>     |            | Transport and binding                    | 9.301  | 8.401  | 10.647 | 9.366  | 4.01E-01 | 1.40E-02 | -0.90 | -1.28 |
| <i>lpg2082</i> | small ORF (57aa) sex pilus assembly TraF (conjugative t <i>traF</i>     |            | Transport and binding                    | 8.920  | 9.928  | 10.512 | 9.436  | 7.76E-04 | 2.32E-02 | 1.01  | -1.08 |
| <i>lpg2083</i> | TraN (mating pair stablization protein) (conjugative transf <i>traN</i> |            | Transport and binding                    | 7.132  | 8.430  | 7.479  | 7.824  | 1.49E-01 | 8.49E-01 | 1.30  | 0.35  |
| <i>lpg2083</i> | TraN (mating pair stablization protein) (conjugative transf <i>traN</i> |            | Transport and binding                    | 5.985  | 8.914  | 6.705  | 8.371  | 2.96E-02 | 2.59E-01 | 2.93  | 1.67  |
| <i>lpg2084</i> | putative conjugative transfer protein TrbC                              |            | Transport and binding                    | 8.395  | 7.800  | 8.155  | 8.030  | 2.03E-01 | 9.31E-01 | -0.60 | -0.12 |
| <i>lpg2084</i> | putative conjugative transfer protein TrbC                              |            | Transport and binding                    | 8.694  | 7.881  | 7.742  | 8.425  | 4.50E-01 | 5.59E-01 | -0.81 | 0.68  |
| <i>lpg2085</i> | TraU (sex pilus assembly and synthesis protein) (conjuqæ <i>traU</i>    |            | Transport and binding                    | 9.438  | 8.619  | 10.010 | 9.305  | 2.67E-01 | 3.45E-01 | -0.82 | -0.70 |
| <i>lpg2085</i> | TraU (sex pilus assembly and synthesis protein) (conjuqæ <i>traU</i>    |            | Transport and binding                    | 9.382  | 9.558  | 9.319  | 9.986  | 8.89E-01 | 6.02E-01 | 0.18  | 0.67  |
| <i>lpg2086</i> | TraW (sex pilus assembly and synthesis protein)                         |            | Transport and binding                    | 7.120  | 7.614  | 7.724  | 8.451  | 5.31E-01 | 2.56E-01 | 0.49  | 0.73  |
| <i>lpg2086</i> | TraW (sex pilus assembly and synthesis protein)                         |            | Transport and binding                    | 7.758  | 6.837  | 6.605  | 8.371  | 5.58E-01 | 1.54E-01 | -0.92 | 1.77  |
| <i>lpg2087</i> | TraC (sex pilus assembly and synthesis protein) (conjuqæ <i>traC</i>    |            | Transport and binding                    | 7.281  | 7.535  | 6.759  | 7.234  | 7.17E-01 | 7.33E-01 | 0.25  | 0.48  |
| <i>lpg2087</i> | TraC (sex pilus assembly and synthesis protein) (conjuqæ <i>traC</i>    |            | Transport and binding                    | 6.316  | 8.258  | 7.550  | 9.863  | 3.91E-01 | 2.02E-01 | 1.94  | 2.31  |
| <i>lpg2088</i> | conjugative transfer: assembly <i>traV</i>                              |            | Transport and binding                    | 8.783  | 8.387  | 10.073 | 9.430  | 4.80E-01 | 5.37E-02 | -0.40 | -0.64 |
| <i>lpg2088</i> | conjugative transfer: assembly <i>traV</i>                              |            | Transport and binding                    | 9.324  | 9.370  | 9.976  | 10.532 | 9.32E-01 | 3.27E-01 | 0.05  | 0.56  |
| <i>lpg2089</i> | putative conjugative transfer protein TraB                              |            | Transport and binding, Replication anc   | 8.643  | 8.879  | 9.163  | 9.244  | 1.02E-02 | 8.29E-01 | 1.24  | 0.08  |
| <i>lpg2089</i> | putative conjugative transfer protein TraB                              |            | Transport and binding, Replication anc   | 8.594  | 8.971  | 9.141  | 9.310  | 5.75E-01 | 6.99E-01 | 0.38  | 0.17  |
| <i>lpg2090</i> | putative conjugative transfer protein TraK                              |            | Transport and binding                    | 7.788  | 5.949  | 7.010  | 6.888  | 1.10E-01 | 8.97E-01 | -1.84 | -0.12 |
| <i>lpg2090</i> | putative conjugative transfer protein TraK                              |            | Transport and binding                    | 6.286  | 7.997  | 4.554  | 9.066  | 5.80E-01 | 1.74E-01 | 1.71  | 4.51  |
| <i>lpg2091</i> | putative conjugative transfer protein TraE                              |            | Transport and binding                    | 7.272  | 8.593  | 8.954  | 7.889  | 3.96E-01 | 4.57E-01 | 1.32  | -1.07 |
| <i>lpg2091</i> | putative conjugative transfer protein TraE                              |            | Transport and binding                    | 9.308  | 10.637 | 8.856  | 8.545  | 4.09E-01 | 7.40E-01 | 1.33  | -0.31 |
| <i>lpg2092</i> | ORF (sex pilus assembly protein??)                                      |            | Unknown / hypothetical proteins          | 8.007  | 7.480  | 8.813  | 8.418  | 8.30E-01 | 6.35E-01 | -0.53 | -0.40 |
| <i>lpg2092</i> | ORF (sex pilus assembly protein??)                                      |            | Unknown / hypothetical proteins          | 8.276  | 6.326  | 7.548  | 8.071  | 3.98E-01 | 6.85E-01 | -1.95 | 0.52  |

|                |                                                                        |             |                                          |        |        |        |        |          |          |       |       |
|----------------|------------------------------------------------------------------------|-------------|------------------------------------------|--------|--------|--------|--------|----------|----------|-------|-------|
| <i>lpg2093</i> | ORF (fimbrial protein precursor?)                                      |             | Unknown / hypothetical proteins          | 6.774  | 6.420  | 8.307  | 7.813  | 8.88E-01 | 8.76E-01 | -0.35 | -0.49 |
| <i>lpg2093</i> | ORF (fimbrial protein precursor?)                                      |             | Unknown / hypothetical proteins          | 5.829  | 8.960  | 8.621  | 6.927  | 3.33E-01 | 9.75E-01 | 3.13  | 0.11  |
| <i>lpg2094</i> | carbon storage regulator RsmA (controls glycogen synth <i>csrA</i> )   |             | Signal transduction / other regulatory f | 8.937  | 8.871  | 9.803  | 8.406  | 9.09E-01 | 1.97E-02 | -0.07 | -1.40 |
| <i>lpg2094</i> | carbon storage regulator RsmA (controls glycogen synth <i>csrA</i> )   |             | Signal transduction / other regulatory f | 8.764  | 10.469 | 9.729  | 8.815  | 1.17E-02 | 2.11E-01 | 1.71  | -0.91 |
| <i>lpg2095</i> | LvrA                                                                   | <i>lvrA</i> | Transport and binding, Protein fate / h  | 7.331  | 7.264  | 6.727  | 5.282  | 9.51E-01 | 4.34E-01 | -0.07 | -1.45 |
| <i>lpg2095</i> | LvrA                                                                   | <i>lvrA</i> | Transport and binding, Protein fate / h  | 6.778  | 8.305  | 6.365  | 7.363  | 2.81E-01 | 5.51E-01 | 1.53  | 1.00  |
| <i>lpg2096</i> | hypothetical (prophage repressor Cl?)                                  |             | Unknown / hypothetical proteins          | 9.828  | 9.475  | 10.998 | 9.124  | 3.37E-01 | 2.36E-02 | -0.35 | -1.87 |
| <i>lpg2096</i> | hypothetical (prophage repressor Cl?)                                  |             | Unknown / hypothetical proteins          | 9.551  | 9.013  | 10.835 | 9.499  | 8.35E-02 | 9.97E-02 | -0.54 | -1.34 |
| <i>lpg2097</i> | hypothetical protein                                                   |             | Unknown / hypothetical proteins          | 9.516  | 9.320  | 8.780  | 8.896  | 8.02E-01 | 8.95E-01 | -0.20 | 0.12  |
| <i>lpg2097</i> | hypothetical protein                                                   |             | Unknown / hypothetical proteins          | 9.732  | 9.200  | 8.431  | 8.580  | 3.39E-01 | 8.59E-01 | -0.53 | 0.15  |
| <i>lpg2098</i> | MsrA3 - peptide methionine sulfoxide reductase                         |             | Detoxification / adaptation              | 9.042  | 7.724  | 7.871  | 7.734  | 4.29E-03 | 9.08E-01 | -1.32 | -0.14 |
| <i>lpg2098</i> | MsrA3 - peptide methionine sulfoxide reductase                         |             | Detoxification / adaptation              | 9.241  | 7.727  | 8.286  | 8.450  | 1.25E-02 | 8.68E-01 | -1.51 | 0.16  |
| <i>lpg2099</i> | MsrA2 - peptide methionine sulfoxide reductase                         |             | Detoxification / adaptation              | 7.673  | 6.498  | 7.206  | 6.712  | 3.47E-01 | 6.71E-01 | -1.18 | -0.49 |
| <i>lpg2099</i> | MsrA2 - peptide methionine sulfoxide reductase                         |             | Detoxification / adaptation              | 7.699  | 7.087  | 7.376  | 7.388  | 5.53E-01 | 9.90E-01 | -0.61 | 0.01  |
| <i>lpg2100</i> | phosphatidoglycerophosphate synthase?                                  |             | Metabolism of Complex Lipids             | 12.207 | 11.909 | 13.345 | 12.370 | 5.98E-01 | 6.95E-02 | -0.30 | -0.98 |
| <i>lpg2100</i> | phosphatidoglycerophosphate synthase?                                  |             | Metabolism of Complex Lipids             | 12.163 | 12.008 | 13.233 | 12.299 | 7.16E-01 | 5.59E-02 | -0.16 | -0.93 |
| <i>lpg2101</i> | mercuric reductase (dihydroliipoamide dehydrogenase/qli <i>merA1</i> ) |             | Detoxification / adaptation              | 10.341 | 9.522  | 10.849 | 8.539  | 1.51E-01 | 7.26E-02 | -0.82 | -2.31 |
| <i>lpg2101</i> | mercuric reductase (dihydroliipoamide dehydrogenase/qli <i>merA1</i> ) |             | Detoxification / adaptation              | 10.277 | 9.576  | 10.757 | 9.100  | 2.10E-01 | 1.32E-02 | -0.70 | -1.66 |
| <i>lpg2102</i> | sterol desaturase                                                      |             | Lipid Metabolism                         | 7.079  | 7.794  | 8.205  | 8.033  | 6.31E-01 | 9.04E-01 | 0.72  | -0.17 |
| <i>lpg2102</i> | sterol desaturase                                                      |             | Lipid Metabolism                         | 7.864  | 8.326  | 8.266  | 8.146  | 6.66E-01 | 9.21E-01 | 0.46  | -0.12 |
| <i>lpg2103</i> | small ORF (48aa) integrase/recombinase?                                |             | Viral functions / Phage / Transposases   | 7.279  | 8.665  | 6.740  | 6.690  | 2.72E-01 | 9.79E-01 | 1.39  | -0.05 |
| <i>lpg2103</i> | small ORF (48aa) integrase/recombinase?                                |             | Viral functions / Phage / Transposases   | 7.783  | 8.433  | 7.630  | 8.065  | 5.43E-01 | 7.74E-01 | 0.65  | 0.43  |
| <i>lpg2104</i> | glutathione S-transferase?                                             |             | Detoxification / adaptation              | 7.606  | 7.633  | 8.562  | 8.096  | 9.85E-01 | 6.02E-01 | 0.03  | -0.47 |
| <i>lpg2104</i> | glutathione S-transferase?                                             |             | Detoxification / adaptation              | 7.420  | 6.493  | 8.172  | 8.252  | 6.22E-01 | 9.40E-01 | -0.93 | 0.08  |
| <i>lpg2105</i> | transmembrane protein? COG2259                                         |             | Unknown / hypothetical proteins          | 7.309  | 6.995  | 9.302  | 6.985  | 8.29E-01 | 9.60E-02 | -0.31 | -2.32 |
| <i>lpg2105</i> | transmembrane protein? COG2259                                         |             | Unknown / hypothetical proteins          | 8.446  | 9.073  | 9.173  | 7.984  | 5.81E-01 | 3.73E-01 | 0.63  | -1.19 |
| <i>lpg2106</i> | conserved hypothetical protein                                         |             | Unknown / hypothetical proteins          | 9.095  | 7.785  | 8.241  | 7.982  | 1.59E-01 | 8.00E-01 | -1.31 | -0.26 |
| <i>lpg2106</i> | conserved hypothetical protein                                         |             | Unknown / hypothetical proteins          | 9.563  | 6.749  | 7.880  | 8.619  | 1.47E-05 | 3.82E-01 | -2.81 | 0.74  |
| <i>lpg2107</i> | hypothetical protein                                                   |             | Unknown / hypothetical proteins          | 5.843  | 8.293  | 6.620  | 7.257  | 5.84E-02 | 8.07E-01 | 2.45  | 0.64  |
| <i>lpg2107</i> | hypothetical protein                                                   |             | Unknown / hypothetical proteins          | 5.375  | 7.432  | 6.620  | 8.226  | 2.20E-01 | 2.94E-01 | 2.06  | 1.61  |
| <i>lpg2108</i> | ORF (integral membrane protein?)                                       |             | Unknown / hypothetical proteins          | 6.729  | 7.090  | 8.651  | 7.960  | 8.19E-01 | 3.71E-01 | 0.36  | -0.69 |
| <i>lpg2108</i> | ORF (integral membrane protein?)                                       |             | Unknown / hypothetical proteins          | 6.849  | 7.667  | 8.189  | 8.298  | 5.66E-01 | 9.39E-01 | 0.82  | 0.11  |
| <i>lpg2109</i> | ORF                                                                    |             | ORFs of unknown function (unique)        | 8.037  | 9.894  | 9.483  | 9.356  | 2.04E-01 | 9.04E-01 | 1.86  | -0.13 |
| <i>lpg2109</i> | ORF                                                                    |             | ORFs of unknown function (unique)        | 8.228  | 10.509 | 9.338  | 9.681  | 3.98E-02 | 6.24E-01 | 2.28  | 0.34  |
| <i>lpg2110</i> | hypothetical protein                                                   |             | Unknown / hypothetical proteins          | 9.773  | 9.026  | 10.573 | 9.743  | 2.58E-01 | 2.14E-01 | -0.75 | -0.83 |
| <i>lpg2110</i> | hypothetical protein                                                   |             | Unknown / hypothetical proteins          | 9.694  | 9.566  | 10.510 | 9.732  | 7.29E-01 | 2.52E-01 | -0.13 | -0.78 |
| <i>lpg2111</i> | peptide methionine sulfoxide reductase                                 |             | Detoxification / adaptation              | 6.702  | 8.242  | 7.178  | 6.069  | 2.44E-02 | 5.85E-01 | 1.54  | -1.11 |
| <i>lpg2111</i> | peptide methionine sulfoxide reductase                                 |             | Detoxification / adaptation              | 6.621  | 7.236  | 7.223  | 6.925  | 6.01E-01 | 7.79E-01 | 0.61  | -0.30 |
| <i>lpg2112</i> | 24 kDa macrophage-induced major protein (alkylhydroperoxidase Ah)      |             | Toxin production / other pathogen func   | 7.391  | 7.350  | 6.161  | 6.416  | 9.66E-01 | 9.08E-01 | -0.04 | 0.26  |
| <i>lpg2112</i> | 24 kDa macrophage-induced major protein (alkylhydroperoxidase Ah)      |             | Toxin production / other pathogen func   | 7.687  | 7.687  | 7.426  | 8.525  | 9.99E-01 | 2.10E-01 | 0.00  | 1.10  |
| <i>lpg2113</i> | ATP dependent DNA helicase?                                            | <i>recG</i> | DNA/RNA degradation / restriction, Tr    | 7.952  | 7.382  | 9.011  | 6.137  | 2.99E-01 | 3.17E-03 | -0.57 | -2.87 |
| <i>lpg2113</i> | ATP dependent DNA helicase?                                            | <i>recG</i> | DNA/RNA degradation / restriction, Tr    | 7.210  | 7.125  | 8.828  | 7.251  | 9.47E-01 | 4.52E-02 | -0.09 | -1.58 |
| <i>lpg2114</i> | transposase                                                            |             | Viral functions / Phage / Transposases   | 7.653  | 7.380  | 4.718  | 6.412  | 8.92E-01 | 4.16E-01 | -0.27 | 1.69  |
| <i>lpg2114</i> | transposase                                                            |             | Viral functions / Phage / Transposases   | 7.254  | 7.045  | 4.809  | 7.739  | 9.54E-01 | 6.98E-02 | -0.21 | 2.93  |
| <i>lpg2115</i> | hypothetical (phage AbiD protein)                                      |             | Viral functions / Phage / Transposases   | 9.447  | 9.900  | 11.135 | 9.299  | 3.15E-01 | 1.75E-03 | 0.45  | -1.84 |
| <i>lpg2115</i> | hypothetical (phage AbiD protein)                                      |             | Viral functions / Phage / Transposases   | 10.125 | 9.653  | 9.841  | 9.712  | 5.39E-01 | 8.34E-01 | -0.47 | -0.13 |
| <i>lpg2119</i> | transposase (ISnav2) COG2801                                           |             | Viral functions / Phage / Transposases   | 8.281  | 8.810  | 9.047  | 7.707  | 3.02E-01 | 8.12E-02 | 0.53  | -1.34 |
| <i>lpg2119</i> | transposase (ISnav2) COG2801                                           |             | Viral functions / Phage / Transposases   | 8.406  | 9.007  | 9.373  | 8.107  | 4.02E-01 | 6.46E-02 | 0.60  | -1.27 |
| <i>lpg2120</i> | transposase, IS4 family (Tn5, TnpA)                                    |             | Viral functions / Phage / Transposases   | 8.662  | 7.743  | 9.161  | 8.706  | 3.78E-01 | 5.75E-01 | -0.92 | -0.46 |
| <i>lpg2120</i> | transposase, IS4 family (Tn5, TnpA)                                    |             | Viral functions / Phage / Transposases   | 8.736  | 8.810  | 9.105  | 9.229  | 8.59E-01 | 8.55E-01 | 0.07  | 0.12  |
| <i>lpg2121</i> | cold shock DNA binding domain protein (cold shock transcriptional re)  |             | Detoxification / adaptation, Transcripti | 14.468 | 9.547  | 12.309 | 10.001 | 2.88E-05 | 2.55E-03 | -4.92 | -2.31 |
| <i>lpg2121</i> | cold shock DNA binding domain protein (cold shock transcriptional re)  |             | Detoxification / adaptation, Transcripti | 14.303 | 9.611  | 12.282 | 10.252 | 5.10E-05 | 5.82E-03 | -4.69 | -2.03 |
| <i>lpg2122</i> | ATP dependent RNA helicase DeaD                                        | <i>dbpA</i> | DNA/RNA degradation / restriction, Tr    | 11.862 | 11.374 | 9.782  | 10.749 | 1.83E-01 | 1.49E-01 | -0.49 | 0.97  |
| <i>lpg2122</i> | ATP dependent RNA helicase DeaD                                        | <i>dbpA</i> | DNA/RNA degradation / restriction, Tr    | 11.999 | 11.303 | 9.864  | 10.923 | 3.17E-02 | 1.31E-01 | -0.70 | 1.06  |
| <i>lpg2123</i> | cobalt zinc cadmium cation transporter (membrane protein)              |             | Transport and binding                    | 11.158 | 9.966  | 12.367 | 9.568  | 1.10E-01 | 6.61E-04 | -1.19 | -2.80 |
| <i>lpg2123</i> | cobalt zinc cadmium cation transporter (membrane protein)              |             | Transport and binding                    | 11.123 | 10.029 | 12.392 | 10.094 | 1.25E-01 | 2.00E-04 | -1.09 | -2.30 |
| <i>lpg2124</i> | small ORF (57aa)                                                       |             | ORFs of unknown function (unique)        | 8.185  | 9.263  | 8.597  | 8.841  | 4.56E-01 | 7.63E-01 | 1.08  | 0.24  |
| <i>lpg2124</i> | small ORF (57aa)                                                       |             | ORFs of unknown function (unique)        | 8.745  | 8.862  | 8.404  | 8.925  | 9.35E-01 | 5.22E-01 | 0.12  | 0.52  |
| <i>lpg2125</i> | small ORF (153aa) transmembrane transport protein? cAMP depend         |             | Transport and binding                    | 10.658 | 10.408 | 12.444 | 10.309 | 5.55E-01 | 4.78E-04 | -0.25 | -2.13 |
| <i>lpg2125</i> | small ORF (153aa) transmembrane transport protein? cAMP depend         |             | Transport and binding                    | 10.710 | 10.768 | 12.236 | 10.613 | 8.17E-01 | 1.14E-03 | 0.06  | -1.62 |
| <i>lpg2126</i> | Kup system potassium uptake protein                                    | <i>kup2</i> | Transport and binding                    | 9.266  | 8.961  | 10.540 | 8.074  | 6.01E-01 | 5.55E-03 | -0.31 | -2.47 |
| <i>lpg2126</i> | Kup system potassium uptake protein                                    | <i>kup2</i> | Transport and binding                    | 9.499  | 9.101  | 10.537 | 8.177  | 5.53E-01 | 4.01E-02 | -0.40 | -2.36 |
| <i>lpg2127</i> | hypothetical COG3034                                                   |             | Unknown / hypothetical proteins          | 9.180  | 11.871 | 10.443 | 8.665  | 3.28E-05 | 6.53E-03 | 2.69  | -1.78 |
| <i>lpg2127</i> | hypothetical COG3034                                                   |             | Unknown / hypothetical proteins          | 9.467  | 12.035 | 10.166 | 8.839  | 6.80E-05 | 8.66E-03 | 2.57  | -1.33 |

|                |                                                                            |                |                                          |        |        |        |        |          |          |       |       |
|----------------|----------------------------------------------------------------------------|----------------|------------------------------------------|--------|--------|--------|--------|----------|----------|-------|-------|
| <i>lpg2128</i> | ORF                                                                        |                | ORFs of unknown function (unique)        | 9.925  | 10.323 | 8.297  | 11.101 | 2.56E-01 | 2.57E-04 | 0.40  | 2.80  |
| <i>lpg2128</i> | ORF                                                                        |                | ORFs of unknown function (unique)        | 9.675  | 10.231 | 7.329  | 11.174 | 3.11E-01 | 2.88E-03 | 0.56  | 3.85  |
| <i>lpg2129</i> | small ORF (98aa)?                                                          |                | ORFs of unknown function (unique)        | 6.987  | 5.852  | 8.264  | 6.538  | 1.54E-01 | 3.89E-02 | -1.13 | -1.73 |
| <i>lpg2129</i> | small ORF (98aa)?                                                          |                | ORFs of unknown function (unique)        | 6.569  | 7.080  | 8.087  | 7.517  | 7.71E-01 | 6.98E-01 | 0.51  | -0.57 |
| <i>lpg2130</i> | small ORF (89aa)?                                                          |                | ORFs of unknown function (unique)        | 9.111  | 9.504  | 9.314  | 8.485  | 5.24E-01 | 4.47E-01 | 0.39  | -0.83 |
| <i>lpg2130</i> | small ORF (89aa)?                                                          |                | ORFs of unknown function (unique)        | 9.442  | 8.754  | 10.105 | 9.378  | 6.09E-01 | 2.91E-01 | -0.69 | -0.73 |
| <i>lpg2131</i> | ankyrin 3, node of Ranvier (ankyrin G)                                     | <i>legA6</i>   | Named proteins of general function       | 8.817  | 10.125 | 9.983  | 10.204 | 5.43E-02 | 7.10E-01 | 1.31  | 0.22  |
| <i>lpg2131</i> | ankyrin 3, node of Ranvier (ankyrin G)                                     | <i>legA6</i>   | Named proteins of general function       | 9.631  | 11.544 | 10.134 | 11.726 | 2.21E-04 | 1.84E-03 | 1.91  | 1.59  |
| <i>lpg2132</i> | sensory box/GGDEF family protein (regulatory components of sensor          |                | Signal transduction / other regulatory f | 9.626  | 9.696  | 11.759 | 7.994  | 8.96E-01 | 6.57E-03 | 0.07  | -3.77 |
| <i>lpg2132</i> | sensory box/GGDEF family protein (regulatory components of sensor          |                | Signal transduction / other regulatory f | 9.801  | 8.885  | 11.479 | 8.410  | 3.48E-01 | 5.08E-02 | -0.92 | -3.07 |
| <i>lpg2133</i> | proline/glycine betaine transporter (major facilitator family transporter) |                | Transport and binding                    | 10.079 | 10.040 | 10.814 | 10.681 | 9.53E-01 | 8.23E-01 | -0.04 | -0.13 |
| <i>lpg2133</i> | proline/glycine betaine transporter (major facilitator family transporter) |                | Transport and binding                    | 9.981  | 10.166 | 10.611 | 10.717 | 7.57E-01 | 8.44E-01 | 0.18  | 0.11  |
| <i>lpg2134</i> | chemiosmotic efflux system protein A (heavy metal efflux pump CzcaA)       |                | Transport and binding                    | 9.788  | 8.773  | 10.409 | 8.517  | 1.31E-01 | 1.41E-02 | -1.02 | -1.89 |
| <i>lpg2134</i> | chemiosmotic efflux system protein A (heavy metal efflux pump CzcaA)       |                | Transport and binding                    | 9.972  | 9.453  | 10.404 | 9.211  | 4.50E-01 | 1.27E-01 | -0.52 | -1.19 |
| <i>lpg2135</i> | chemiosmotic efflux system protein B (cation efflux system)                |                | Transport and binding                    | 10.583 | 8.838  | 10.310 | 9.758  | 9.11E-03 | 3.19E-01 | -1.75 | -0.55 |
| <i>lpg2135</i> | chemiosmotic efflux system protein B (cation efflux system)                |                | Transport and binding                    | 10.487 | 8.841  | 9.373  | 9.298  | 1.57E-03 | 9.46E-01 | -1.65 | -0.08 |
| <i>lpg2136</i> | chemiosmotic efflux system protein C (cobalt-zinc-cadmium resistanc        |                | Transport and binding                    | 11.969 | 10.572 | 10.237 | 11.555 | 2.75E-04 | 5.49E-03 | -1.40 | 1.32  |
| <i>lpg2136</i> | chemiosmotic efflux system protein C (cobalt-zinc-cadmium resistanc        |                | Transport and binding                    | 11.871 | 10.473 | 10.055 | 11.481 | 2.58E-04 | 3.79E-03 | -1.40 | 1.43  |
| <i>lpg2137</i> | calmodulin-dependent protein kinase                                        | <i>legK2</i>   | Signal transduction / other regulatory f | 10.161 | 9.769  | 11.727 | 9.983  | 3.49E-01 | 5.24E-03 | -0.39 | -1.74 |
| <i>lpg2137</i> | calmodulin-dependent protein kinase                                        | <i>legK2</i>   | Signal transduction / other regulatory f | 10.279 | 10.247 | 11.735 | 10.831 | 9.47E-01 | 6.74E-02 | -0.03 | -0.90 |
| <i>lpg2138</i> | transcriptional regulator, LysR family                                     |                | Transcription factors / DNA binding prc  | 9.183  | 8.776  | 11.134 | 8.381  | 4.72E-01 | 2.84E-03 | -0.41 | -2.75 |
| <i>lpg2138</i> | transcriptional regulator, LysR family                                     |                | Transcription factors / DNA binding prc  | 9.095  | 9.399  | 11.145 | 8.739  | 6.06E-01 | 2.02E-02 | 0.30  | -2.41 |
| <i>lpg2139</i> | pyridoxamine 5'-phosphate oxidase                                          |                | Metabolism of Cofactors and Vitamins     | 10.695 | 10.649 | 11.436 | 11.519 | 8.25E-01 | 7.30E-01 | -0.05 | 0.08  |
| <i>lpg2139</i> | pyridoxamine 5'-phosphate oxidase                                          |                | Metabolism of Cofactors and Vitamins     | 10.762 | 10.825 | 11.237 | 11.571 | 7.24E-01 | 1.59E-01 | 0.06  | 0.33  |
| <i>lpg2140</i> | small ORF (126aa) transcriptional regulator, MarR family                   |                | Transcription factors / DNA binding prc  | 10.315 | 10.057 | 10.942 | 10.367 | 5.85E-01 | 4.49E-01 | -0.26 | -0.58 |
| <i>lpg2140</i> | small ORF (126aa) transcriptional regulator, MarR family                   |                | Transcription factors / DNA binding prc  | 10.134 | 9.200  | 10.338 | 10.178 | 4.99E-01 | 5.98E-01 | -0.93 | -0.16 |
| <i>lpg2141</i> | glucose-1-dehydrogenase, (3-oxoacyl-(acyl carrier protein) reductase       |                | Named proteins of general function       | 9.723  | 11.483 | 9.730  | 11.552 | 5.47E-02 | 8.85E-02 | 1.76  | 1.82  |
| <i>lpg2141</i> | glucose-1-dehydrogenase, (3-oxoacyl-(acyl carrier protein) reductase       |                | Named proteins of general function       | 9.508  | 10.475 | 9.033  | 10.883 | 2.75E-01 | 7.42E-02 | 0.97  | 1.85  |
| <i>lpg2142</i> | small ORF (86aa)?                                                          |                | ORFs of unknown function (unique)        | 8.329  | 8.531  | 8.559  | 8.192  | 6.94E-01 | 5.69E-01 | 0.20  | -0.37 |
| <i>lpg2142</i> | small ORF (86aa)?                                                          |                | ORFs of unknown function (unique)        | 8.156  | 9.693  | 9.157  | 9.154  | 2.68E-02 | 9.95E-01 | 1.54  | 0.00  |
| <i>lpg2143</i> | ORF                                                                        |                | ORFs of unknown function (unique)        | 8.797  | 7.989  | 10.543 | 7.619  | 1.41E-01 | 1.30E-03 | -0.81 | -2.92 |
| <i>lpg2143</i> | ORF                                                                        |                | ORFs of unknown function (unique)        | 8.851  | 8.242  | 10.336 | 8.888  | 4.19E-01 | 1.19E-01 | -0.61 | -1.45 |
| <i>lpg2144</i> | F-box protein?                                                             | <i>legAU13</i> | Named proteins of general function       | 8.333  | 8.863  | 10.267 | 7.159  | 1.73E-01 | 2.95E-03 | 0.53  | -3.11 |
| <i>lpg2144</i> | F-box protein?                                                             | <i>legAU13</i> | Named proteins of general function       | 9.085  | 9.991  | 10.313 | 9.380  | 1.51E-01 | 2.35E-02 | 0.91  | -0.93 |
| <i>lpg2145</i> | two component response regulator, CheY homologous receiver doma            |                | Signal transduction / other regulatory f | 9.228  | 9.554  | 11.169 | 7.616  | 6.47E-01 | 3.02E-02 | 0.33  | -3.55 |
| <i>lpg2145</i> | two component response regulator, CheY homologous receiver doma            |                | Signal transduction / other regulatory f | 9.451  | 9.169  | 11.384 | 9.279  | 7.18E-01 | 2.92E-02 | -0.28 | -2.11 |
| <i>lpg2146</i> | response regulator TutC (two component hybrid sensor and regulator         |                | Signal transduction / other regulatory f | 8.424  | 7.359  | 9.635  | 6.748  | 1.72E-01 | 9.51E-02 | -1.06 | -2.89 |
| <i>lpg2146</i> | response regulator TutC (two component hybrid sensor and regulator         |                | Signal transduction / other regulatory f | 8.112  | 6.962  | 9.710  | 7.324  | 4.04E-01 | 1.39E-01 | -1.15 | -2.39 |
| <i>lpg2147</i> | ORF                                                                        |                | ORFs of unknown function (unique)        | 11.471 | 10.790 | 14.376 | 10.813 | 3.82E-01 | 2.39E-03 | -0.68 | -3.56 |
| <i>lpg2147</i> | ORF                                                                        |                | ORFs of unknown function (unique)        | 11.723 | 10.882 | 14.402 | 10.918 | 2.50E-01 | 2.78E-03 | -0.84 | -3.48 |
| <i>lpg2148</i> | ORF                                                                        |                | ORFs of unknown function (unique)        | 9.353  | 10.602 | 10.582 | 8.681  | 5.53E-02 | 6.65E-03 | 1.25  | -1.90 |
| <i>lpg2148</i> | ORF                                                                        |                | ORFs of unknown function (unique)        | 9.543  | 10.816 | 10.504 | 9.003  | 1.34E-02 | 4.07E-02 | 1.27  | -1.50 |
| <i>lpg2149</i> | ORF                                                                        |                | ORFs of unknown function (unique)        | 11.674 | 12.995 | 13.768 | 10.925 | 4.12E-02 | 8.85E-04 | 1.32  | -2.84 |
| <i>lpg2149</i> | ORF                                                                        |                | ORFs of unknown function (unique)        | 11.715 | 12.987 | 13.790 | 10.980 | 5.35E-02 | 6.32E-04 | 1.27  | -2.81 |
| <i>lpg2150</i> | ORF                                                                        |                | ORFs of unknown function (unique)        | 10.954 | 10.869 | 10.129 | 11.232 | 7.52E-01 | 1.87E-02 | -0.09 | 1.10  |
| <i>lpg2150</i> | ORF                                                                        |                | ORFs of unknown function (unique)        | 10.884 | 11.011 | 9.570  | 11.224 | 6.97E-01 | 2.51E-02 | 0.13  | 1.65  |
| <i>lpg2151</i> | aminoglycoside 6-adenylyltransferase (streptomycin aminoglycoside          |                | Detoxification / adaptation              | 10.701 | 9.443  | 9.663  | 9.286  | 8.52E-02 | 7.29E-01 | -1.26 | -0.38 |
| <i>lpg2151</i> | aminoglycoside 6-adenylyltransferase (streptomycin aminoglycoside          |                | Detoxification / adaptation              | 10.531 | 9.957  | 9.098  | 10.394 | 2.19E-01 | 1.69E-01 | -0.57 | 1.30  |
| <i>lpg2152</i> | multidrug resistance ABC transporter ATP-binding proteir <i>abcT3</i>      |                | Transport and binding                    | 11.103 | 10.007 | 11.225 | 10.073 | 2.26E-04 | 2.28E-04 | -1.10 | -1.15 |
| <i>lpg2152</i> | multidrug resistance ABC transporter ATP-binding proteir <i>abcT3</i>      |                | Transport and binding                    | 10.985 | 10.122 | 11.071 | 10.013 | 1.60E-02 | 2.20E-04 | -0.86 | -1.06 |
| <i>lpg2153</i> | SdeC, SdeB, AliA, SdeA, SdeD homology                                      | <i>sdeC</i>    | Toxin production / other pathogen func   | 10.477 | 11.240 | 13.723 | 10.821 | 3.74E-01 | 3.09E-03 | 0.76  | -2.90 |
| <i>lpg2153</i> | SdeC, SdeB, AliA, SdeA, SdeD homology                                      | <i>sdeC</i>    | Toxin production / other pathogen func   | 10.571 | 11.170 | 13.778 | 11.206 | 4.43E-01 | 1.15E-02 | 0.60  | -2.57 |
| <i>lpg2154</i> | SdeC, SdeB, AliA, SdeA, SdeD homology                                      |                | Toxin production / other pathogen func   | 10.351 | 14.832 | 11.920 | 12.369 | 1.85E-07 | 4.05E-01 | 4.48  | 0.45  |
| <i>lpg2154</i> | SdeC, SdeB, AliA, SdeA, SdeD homology                                      |                | Toxin production / other pathogen func   | 10.481 | 14.849 | 11.804 | 12.427 | 5.43E-07 | 2.94E-01 | 4.37  | 0.62  |
| <i>lpg2155</i> | ORF                                                                        | <i>sidJ</i>    | ORFs of unknown function (unique)        | 11.699 | 10.897 | 12.991 | 10.151 | 4.10E-01 | 6.87E-06 | -0.80 | -2.84 |
| <i>lpg2155</i> | ORF                                                                        | <i>sidJ</i>    | ORFs of unknown function (unique)        | 11.137 | 11.131 | 12.586 | 10.243 | 9.87E-01 | 2.00E-04 | -0.01 | -2.34 |
| <i>lpg2156</i> | SdeC, SdeB, SdeA, SidE, SdeD, AliA homology, C. elegans <i>sdeB</i>        |                | Toxin production / other pathogen func   | 9.967  | 9.408  | 10.040 | 8.682  | 5.25E-01 | 3.93E-01 | -0.56 | -1.36 |
| <i>lpg2156</i> | SdeC, SdeB, SdeA, SidE, SdeD, AliA homology, C. elegans <i>sdeB</i>        |                | Toxin production / other pathogen func   | 7.973  | 8.453  | 9.500  | 8.289  | 5.25E-01 | 7.88E-02 | 0.48  | -1.21 |
| <i>lpg2157</i> | SdeA, IMH1; Encodes a protein implicated in protein tran <i>sdeA</i>       |                | Transport and binding, Detoxification /  | 10.642 | 10.811 | 13.761 | 10.486 | 7.62E-01 | 3.40E-04 | 0.17  | -3.27 |
| <i>lpg2157</i> | SdeA, IMH1; Encodes a protein implicated in protein tran <i>sdeA</i>       |                | Transport and binding, Detoxification /  | 10.846 | 10.969 | 13.697 | 11.121 | 8.19E-01 | 1.14E-03 | 0.12  | -2.58 |
| <i>lpg2158</i> | phosphatidylethanolamine N-methyltransferase                               | <i>pmtA</i>    | Amino Acid Metabolism                    | 12.742 | 11.923 | 11.560 | 11.438 | 2.73E-04 | 8.34E-01 | -0.82 | -0.12 |
| <i>lpg2158</i> | phosphatidylethanolamine N-methyltransferase                               | <i>pmtA</i>    | Amino Acid Metabolism                    | 12.537 | 11.834 | 11.317 | 11.402 | 6.75E-05 | 8.86E-01 | -0.70 | 0.08  |
| <i>lpg2159</i> | CrtF (enzyme methylating tetracycline) (hydroxyneurosporene (C20) i        |                | Toxin production / other pathogen func   | 8.654  | 7.565  | 9.310  | 8.224  | 2.69E-01 | 1.61E-01 | -1.09 | -1.09 |
| <i>lpg2159</i> | CrtF (enzyme methylating tetracycline) (hydroxyneurosporene (C20) i        |                | Toxin production / other pathogen func   | 8.896  | 8.729  | 9.332  | 8.471  | 7.20E-01 | 2.31E-01 | -0.17 | -0.86 |

|                |                                                                          |                                          |        |        |        |        |          |          |       |       |
|----------------|--------------------------------------------------------------------------|------------------------------------------|--------|--------|--------|--------|----------|----------|-------|-------|
| <i>lpg2160</i> | ORF                                                                      | ORFs of unknown function (unique)        | 9.989  | 12.196 | 9.539  | 11.719 | 4.87E-04 | 8.67E-05 | 2.21  | 2.18  |
| <i>lpg2160</i> | ORF                                                                      | ORFs of unknown function (unique)        | 9.880  | 12.159 | 9.353  | 11.789 | 2.86E-04 | 4.27E-06 | 2.28  | 2.44  |
| <i>lpg2161</i> | conserved hypothetical protein                                           | Unknown / hypothetical proteins          | 8.318  | 9.306  | 9.982  | 8.848  | 4.23E-02 | 1.54E-01 | 0.99  | -1.13 |
| <i>lpg2161</i> | conserved hypothetical protein                                           | Unknown / hypothetical proteins          | 8.666  | 10.158 | 9.529  | 9.898  | 3.00E-02 | 6.26E-01 | 1.49  | 0.37  |
| <i>lpg2162</i> | ORF                                                                      | ORFs of unknown function (unique)        | 8.049  | 7.386  | 8.842  | 9.845  | 5.25E-01 | 1.01E-02 | -0.66 | 1.00  |
| <i>lpg2162</i> | ORF                                                                      | ORFs of unknown function (unique)        | 8.170  | 8.667  | 8.134  | 9.298  | 3.43E-01 | 1.00E-01 | 0.50  | 1.16  |
| <i>lpg2163</i> | (AraC family) transcriptional regulator                                  | Transcription factors / DNA binding prc  | 10.344 | 10.579 | 10.886 | 10.592 | 4.83E-01 | 1.07E-01 | 0.23  | -0.29 |
| <i>lpg2163</i> | (AraC family) transcriptional regulator                                  | Transcription factors / DNA binding prc  | 10.473 | 11.269 | 10.755 | 10.478 | 3.10E-01 | 2.63E-01 | 0.80  | -0.28 |
| <i>lpg2164</i> | hypothetical protein                                                     | Unknown / hypothetical proteins          | 12.359 | 11.813 | 11.776 | 11.603 | 3.34E-02 | 5.10E-01 | -0.55 | -0.17 |
| <i>lpg2164</i> | hypothetical protein                                                     | Unknown / hypothetical proteins          | 12.335 | 11.988 | 11.459 | 11.731 | 3.67E-01 | 6.39E-01 | -0.35 | 0.27  |
| <i>lpg2165</i> | small ORF (170 aa)                                                       | ORFs of unknown function (unique)        | 9.243  | 9.004  | 7.090  | 7.655  | 5.15E-01 | 4.87E-01 | -0.24 | 0.56  |
| <i>lpg2165</i> | small ORF (170 aa)                                                       | ORFs of unknown function (unique)        | 9.035  | 9.368  | 6.811  | 8.429  | 5.00E-01 | 8.62E-02 | 0.33  | 1.62  |
| <i>lpg2166</i> | hypothetical protein                                                     | Unknown / hypothetical proteins          | 11.184 | 11.682 | 9.566  | 11.425 | 3.52E-01 | 2.46E-01 | 0.50  | 1.86  |
| <i>lpg2166</i> | hypothetical protein                                                     | Unknown / hypothetical proteins          | 9.939  | 11.610 | 7.917  | 11.390 | 4.81E-02 | 1.60E-03 | 1.67  | 3.47  |
| <i>lpg2167</i> | transcription regulator protein, DeoR family                             | Transcription factors / DNA binding prc  | 9.416  | 9.794  | 9.555  | 9.908  | 3.62E-01 | 3.78E-01 | 0.38  | 0.35  |
| <i>lpg2167</i> | transcription regulator protein, DeoR family                             | Transcription factors / DNA binding prc  | 9.531  | 10.179 | 9.144  | 9.964  | 7.54E-02 | 1.53E-01 | 0.65  | 0.82  |
| <i>lpg2168</i> | acetyltransferase, GNAT family                                           | Named proteins of general function       | 11.953 | 11.357 | 11.270 | 10.742 | 3.34E-01 | 3.99E-01 | -0.60 | -0.53 |
| <i>lpg2168</i> | acetyltransferase, GNAT family                                           | Named proteins of general function       | 11.861 | 11.492 | 11.155 | 11.126 | 3.83E-01 | 9.39E-01 | -0.37 | -0.03 |
| <i>lpg2169</i> | hypothetical                                                             | Unknown / hypothetical proteins          | 9.532  | 9.483  | 10.521 | 9.510  | 9.39E-01 | 2.94E-02 | -0.05 | -1.01 |
| <i>lpg2169</i> | hypothetical                                                             | Unknown / hypothetical proteins          | 9.385  | 9.667  | 10.551 | 10.298 | 6.50E-01 | 7.26E-01 | 0.28  | -0.25 |
| <i>lpg2170</i> | ORF                                                                      | ORFs of unknown function (unique)        | 10.588 | 10.389 | 10.602 | 9.940  | 6.59E-01 | 2.67E-01 | -0.20 | -0.66 |
| <i>lpg2170</i> | ORF                                                                      | ORFs of unknown function (unique)        | 10.578 | 10.220 | 10.809 | 10.251 | 5.36E-01 | 1.80E-01 | -0.36 | -0.56 |
| <i>lpg2171</i> | hypothetical conserved protein                                           | Unknown / hypothetical proteins          | 9.101  | 11.037 | 10.051 | 10.869 | 1.05E-02 | 4.61E-01 | 1.94  | 0.82  |
| <i>lpg2171</i> | hypothetical conserved protein                                           | Unknown / hypothetical proteins          | 9.599  | 12.309 | 10.644 | 12.010 | 7.46E-04 | 7.05E-02 | 2.71  | 1.37  |
| <i>lpg2172</i> | adenosylhomocysteinase                                                   | Amino Acid Metabolism, Metabolism o      | 11.211 | 11.459 | 12.389 | 12.092 | 6.29E-01 | 6.63E-01 | 0.25  | -0.30 |
| <i>lpg2172</i> | adenosylhomocysteinase                                                   | Amino Acid Metabolism, Metabolism o      | 10.845 | 10.871 | 11.749 | 11.814 | 9.66E-01 | 9.26E-01 | 0.03  | 0.06  |
| <i>lpg2174</i> | tRNA-Lys                                                                 | tRNA                                     | 10.895 | 11.833 | 10.279 | 13.445 | 1.55E-01 | 4.84E-03 | 0.94  | 3.17  |
| <i>lpg2174</i> | tRNA-Lys                                                                 | tRNA                                     | 10.801 | 12.394 | 10.313 | 13.917 | 1.33E-02 | 1.40E-05 | 1.59  | 3.60  |
| <i>lpg2175</i> | (2-pyrone-4,6-)dicarboxylic acid hydrolase                               | Protein fate / hydrolases / secretion    | 11.233 | 11.317 | 13.299 | 10.327 | 9.08E-01 | 2.39E-03 | 0.08  | -2.97 |
| <i>lpg2175</i> | (2-pyrone-4,6-)dicarboxylic acid hydrolase                               | Protein fate / hydrolases / secretion    | 11.256 | 11.723 | 13.349 | 10.455 | 4.85E-01 | 3.03E-03 | 0.47  | -2.89 |
| <i>lpg2176</i> | sphingosine-1-phosphate lyase I (group II decarboxylase <i>legS2</i> )   | Amino Acid Metabolism, Metabolism o      | 10.303 | 8.943  | 8.526  | 11.515 | 4.07E-02 | 2.76E-03 | -1.36 | 2.99  |
| <i>lpg2176</i> | sphingosine-1-phosphate lyase I (group II decarboxylase <i>legS2</i> )   | Amino Acid Metabolism, Metabolism o      | 10.384 | 9.208  | 7.661  | 11.431 | 2.64E-03 | 2.76E-03 | -1.18 | 3.77  |
| <i>lpg2177</i> | HlyD family secretion protein (RND multidrug efflux membrane fusion      | Transport and binding                    | 10.350 | 9.418  | 12.140 | 8.996  | 1.03E-01 | 7.27E-05 | -0.93 | -3.14 |
| <i>lpg2177</i> | HlyD family secretion protein (RND multidrug efflux membrane fusion      | Transport and binding                    | 10.434 | 9.645  | 12.205 | 9.867  | 1.43E-01 | 1.97E-03 | -0.79 | -2.34 |
| <i>lpg2178</i> | probable multidrug-efflux system transmembrane protein <i>mexF2</i>      | Transport and binding                    | 9.711  | 9.424  | 10.298 | 9.082  | 5.78E-01 | 1.60E-01 | -0.29 | -1.22 |
| <i>lpg2178</i> | probable multidrug-efflux system transmembrane protein <i>mexF2</i>      | Transport and binding                    | 9.271  | 9.213  | 9.179  | 9.037  | 9.31E-01 | 8.87E-01 | -0.06 | -0.14 |
| <i>lpg2179</i> | peptide synthetase (non-ribosomal) (microcystin synthetase) (similar     | Toxin production / other pathogen func   | 9.275  | 10.310 | 9.686  | 8.367  | 1.38E-01 | 2.52E-02 | 1.03  | -1.32 |
| <i>lpg2179</i> | peptide synthetase (non-ribosomal) (microcystin synthetase) (similar     | Toxin production / other pathogen func   | 9.296  | 10.224 | 9.672  | 8.594  | 1.91E-01 | 1.28E-02 | 0.93  | -1.08 |
| <i>lpg2180</i> | sensory box histidine kinase/response regulator (aerobic respiration c   | Signal transduction / other regulatory f | 10.179 | 9.535  | 11.699 | 8.495  | 2.71E-01 | 1.38E-03 | -0.64 | -3.20 |
| <i>lpg2180</i> | sensory box histidine kinase/response regulator (aerobic respiration c   | Signal transduction / other regulatory f | 10.212 | 8.651  | 11.487 | 8.589  | 8.36E-02 | 1.84E-03 | -1.56 | -2.90 |
| <i>lpg2181</i> | sensory box sensor histidine kinase/response regulator, putative         | Signal transduction / other regulatory f | 10.447 | 10.592 | 14.069 | 8.468  | 8.98E-01 | 3.00E-03 | 0.15  | -5.60 |
| <i>lpg2181</i> | sensory box sensor histidine kinase/response regulator, putative         | Signal transduction / other regulatory f | 9.770  | 10.345 | 14.037 | 8.928  | 6.40E-01 | 3.03E-03 | 0.58  | -5.11 |
| <i>lpg2182</i> | BG:DS09218.5 gene product                                                | Unknown / hypothetical proteins          | 12.951 | 11.186 | 13.811 | 12.385 | 1.56E-01 | 1.96E-01 | -1.76 | -1.43 |
| <i>lpg2182</i> | BG:DS09218.5 gene product                                                | Unknown / hypothetical proteins          | 12.990 | 12.512 | 13.816 | 12.887 | 3.50E-01 | 3.75E-01 | -0.48 | -0.93 |
| <i>lpg2183</i> | regulatory protein, SyrP-like (antibiotic production)                    | Toxin production / other pathogen func   | 9.481  | 9.624  | 10.331 | 10.121 | 7.66E-01 | 6.76E-01 | 0.14  | -0.21 |
| <i>lpg2183</i> | regulatory protein, SyrP-like (antibiotic production)                    | Toxin production / other pathogen func   | 9.573  | 9.330  | 9.508  | 9.515  | 6.53E-01 | 9.89E-01 | -0.24 | 0.01  |
| <i>lpg2185</i> | small ORF (102aa)                                                        | ORFs of unknown function (unique)        | 11.918 | 13.945 | 13.281 | 14.261 | 5.54E-04 | 6.23E-02 | 2.03  | 0.98  |
| <i>lpg2185</i> | small ORF (102aa)                                                        | ORFs of unknown function (unique)        | 11.944 | 14.108 | 13.252 | 14.392 | 2.93E-04 | 2.65E-02 | 2.16  | 1.14  |
| <i>lpg2186</i> | polyketide synthase, type I                                              | Named proteins of general function       | 10.341 | 11.258 | 10.603 | 11.412 | 3.91E-02 | 5.44E-02 | 0.92  | 0.81  |
| <i>lpg2186</i> | polyketide synthase, type I                                              | Named proteins of general function       | 10.236 | 11.285 | 10.547 | 11.546 | 9.37E-02 | 1.83E-02 | 1.05  | 1.00  |
| <i>lpg2187</i> | small ORF (133aa)                                                        | ORFs of unknown function (unique)        | 10.793 | 10.710 | 13.890 | 10.451 | 9.00E-01 | 9.91E-04 | -0.08 | -3.44 |
| <i>lpg2187</i> | small ORF (133aa)                                                        | ORFs of unknown function (unique)        | 10.588 | 10.972 | 13.830 | 10.597 | 5.95E-01 | 1.74E-03 | -0.38 | -3.23 |
| <i>lpg2188</i> | small ORF (50aa)                                                         | ORFs of unknown function (unique)        | 9.030  | 9.759  | 10.231 | 10.791 | 6.46E-01 | 5.24E-01 | 0.73  | 0.56  |
| <i>lpg2188</i> | small ORF (50aa)                                                         | ORFs of unknown function (unique)        | 7.133  | 10.032 | 8.794  | 10.071 | 2.29E-01 | 2.65E-01 | 2.90  | 1.28  |
| <i>lpg2189</i> | drug efflux protein (transport protein) (resistance protein) <i>ygjT</i> | Transport and binding                    | 11.124 | 10.196 | 11.325 | 9.641  | 4.59E-02 | 5.17E-04 | -0.93 | -1.68 |
| <i>lpg2189</i> | drug efflux protein (transport protein) (resistance protein) <i>ygjT</i> | Transport and binding                    | 10.880 | 10.046 | 11.299 | 9.778  | 5.67E-02 | 8.51E-04 | -0.83 | -1.52 |
| <i>lpg2190</i> | IcmL homolog                                                             | Transport and binding, Toxin productio   | 9.147  | 10.126 | 9.794  | 10.227 | 3.60E-02 | 1.78E-01 | 0.98  | 0.43  |
| <i>lpg2190</i> | IcmL homolog                                                             | Transport and binding, Toxin productio   | 9.301  | 10.946 | 10.078 | 11.118 | 6.85E-04 | 1.60E-02 | 1.64  | 1.04  |
| <i>lpg2191</i> | global stress protein GspA (heat shock protein 16 kDa, h <i>ib</i> )     | Detoxification / adaptation              | 12.829 | 13.138 | 14.968 | 12.459 | 5.39E-01 | 5.59E-04 | 0.31  | -2.51 |
| <i>lpg2191</i> | global stress protein GspA (heat shock protein 16 kDa, h <i>ib</i> )     | Detoxification / adaptation              | 12.902 | 13.305 | 14.982 | 12.697 | 3.85E-01 | 1.97E-04 | 0.40  | -2.29 |
| <i>lpg2192</i> | small HspC2 heat shock protein (16.9 kDa)                                | Detoxification / adaptation              | 11.486 | 12.525 | 13.560 | 12.689 | 5.50E-02 | 6.97E-02 | 1.04  | -0.87 |
| <i>lpg2192</i> | small HspC2 heat shock protein (16.9 kDa)                                | Detoxification / adaptation              | 11.565 | 12.712 | 13.588 | 12.947 | 1.87E-02 | 1.39E-01 | 1.15  | -0.64 |
| <i>lpg2193</i> | sulfate transporter                                                      | Transport and binding                    | 9.931  | 10.626 | 10.488 | 10.595 | 2.39E-02 | 7.68E-01 | 0.70  | 0.11  |
| <i>lpg2193</i> | sulfate transporter                                                      | Transport and binding                    | 9.832  | 9.704  | 10.418 | 10.560 | 8.50E-01 | 6.78E-01 | -0.13 | 0.14  |

|                |                                                                        |                                                  |        |        |        |          |          |          |       |       |
|----------------|------------------------------------------------------------------------|--------------------------------------------------|--------|--------|--------|----------|----------|----------|-------|-------|
| <i>lpg2194</i> | (beta)-carbonic anhydrase                                              | Energy Metabolism                                | 13.506 | 12.582 | 13.011 | 12.144   | 3.12E-01 | 2.16E-01 | -0.92 | -0.87 |
| <i>lpg2194</i> | (beta)-carbonic anhydrase                                              | Energy Metabolism                                | 13.480 | 13.012 | 12.974 | 12.452   | 3.50E-01 | 2.42E-01 | -0.47 | -0.52 |
| <i>lpg2195</i> | small ORF (98aa)                                                       | ORFs of unknown function (unique)                | 9.158  | 9.316  | 10.703 | 9.421    | 8.96E-01 | 9.31E-02 | 0.16  | -1.28 |
| <i>lpg2195</i> | small ORF (98aa)                                                       | ORFs of unknown function (unique)                | 8.895  | 9.740  | 10.107 | 9.338    | 4.22E-01 | 3.55E-01 | 0.85  | -0.77 |
| <i>lpg2196</i> | ornithine cyclodeaminase (mu-crystallin family)                        | Amino Acid Metabolism                            | 12.232 | 12.227 | 13.808 | 11.759   | 9.93E-01 | 6.79E-03 | -0.01 | -2.05 |
| <i>lpg2196</i> | ornithine cyclodeaminase (mu-crystallin family)                        | Amino Acid Metabolism                            | 12.179 | 12.230 | 13.775 | 11.942   | 9.35E-01 | 2.60E-03 | 0.05  | -1.83 |
| <i>lpg2197</i> | COG4319 ketosteroid isomerase                                          | Lipid Metabolism                                 | 11.399 | 11.815 | 14.275 | 11.711   | 6.04E-01 | 9.60E-03 | 0.42  | -2.56 |
| <i>lpg2197</i> | COG4319 ketosteroid isomerase                                          | Lipid Metabolism                                 | 11.412 | 11.826 | 14.247 | 11.692   | 5.97E-01 | 1.01E-02 | 0.41  | -2.56 |
| <i>lpg2198</i> | peptide transport (POT family) (proton/(oligo)peptide symporter, putat | Transport and binding                            | 9.437  | 11.130 | 9.920  | 10.695   | 1.07E-02 | 2.88E-01 | 1.69  | 0.78  |
| <i>lpg2198</i> | peptide transport (POT family) (proton/(oligo)peptide symporter, putat | Transport and binding                            | 9.650  | 10.933 | 9.283  | 10.470   | 8.42E-05 | 3.69E-02 | 1.28  | 1.19  |
| <i>lpg2199</i> | ORF                                                                    | ORFs of unknown function (unique)                | 10.188 | 12.469 | 10.464 | 9.684    | 2.19E-04 | 7.13E-02 | 2.28  | -0.78 |
| <i>lpg2199</i> | ORF                                                                    | ORFs of unknown function (unique)                | 10.100 | 12.816 | 8.628  | 9.662    | 2.64E-03 | 5.19E-01 | 2.72  | 1.03  |
| <i>lpg2200</i> | ORF                                                                    | <i>cegC4</i> ORFs of unknown function (unique)   | 11.053 | 12.832 | 12.303 | 10.756   | 3.88E-04 | 3.05E-04 | 1.78  | -1.55 |
| <i>lpg2200</i> | ORF                                                                    | <i>cegC4</i> ORFs of unknown function (unique)   | 10.996 | 12.850 | 12.310 | 10.963   | 3.94E-04 | 1.82E-03 | 1.85  | -1.35 |
| <i>lpg2201</i> | replication factor C subunit (activator I)                             | Signal transduction / other regulatory f         | 10.756 | 10.335 | 12.535 | 10.041   | 4.00E-01 | 1.37E-03 | -0.42 | -2.49 |
| <i>lpg2201</i> | replication factor C subunit (activator I)                             | Signal transduction / other regulatory f         | 10.747 | 10.640 | 12.460 | 10.453   | 8.81E-01 | 4.46E-03 | -0.11 | -2.01 |
| <i>lpg2202</i> | uncharacterized conserved hypothetical protein COG1371                 | Unknown / hypothetical proteins                  | 9.983  | 9.660  | 9.841  | 10.019   | 7.01E-01 | 7.77E-01 | -0.32 | 0.18  |
| <i>lpg2202</i> | uncharacterized conserved hypothetical protein COG1371                 | Unknown / hypothetical proteins                  | 10.157 | 9.395  | 9.386  | 9.643    | 4.02E-01 | 8.26E-01 | -0.76 | 0.26  |
| <i>lpg2203</i> | (alginate O-acetylation protein?)                                      | Cell envelope synthesis                          | 11.100 | 10.012 | 10.072 | 10.558   | 1.34E-03 | 3.36E-01 | -1.09 | 0.49  |
| <i>lpg2203</i> | (alginate O-acetylation protein?)                                      | Cell envelope synthesis                          | 10.975 | 9.996  | 9.414  | 10.644   | 6.10E-03 | 1.66E-01 | -0.98 | 1.23  |
| <i>lpg2204</i> | alginate O-acetylation protein (cellulose acetylase)                   | Cell envelope synthesis                          | 10.072 | 10.117 | 10.066 | 11.758   | 9.45E-01 | 3.72E-03 | 0.04  | 1.69  |
| <i>lpg2204</i> | alginate O-acetylation protein (cellulose acetylase)                   | Cell envelope synthesis                          | 9.960  | 10.063 | 10.079 | 11.801   | 8.83E-01 | 2.50E-03 | 0.10  | 1.72  |
| <i>lpg2205</i> | ORF                                                                    | ORFs of unknown function (unique)                | 10.517 | 11.260 | 11.922 | 10.131   | 3.48E-01 | 1.64E-02 | 0.74  | -1.79 |
| <i>lpg2205</i> | ORF                                                                    | ORFs of unknown function (unique)                | 10.528 | 11.152 | 11.791 | 10.483   | 3.09E-01 | 1.32E-02 | 0.62  | -1.31 |
| <i>lpg2206</i> | ORF                                                                    | <i>wipB</i> ORFs of unknown function (unique)    | 9.815  | 9.891  | 9.765  | 8.928    | 7.67E-01 | 1.68E-01 | 0.08  | -0.84 |
| <i>lpg2206</i> | ORF                                                                    | <i>wipB</i> ORFs of unknown function (unique)    | 9.711  | 9.840  | 9.489  | 9.657    | 6.75E-01 | 7.28E-01 | 0.13  | 0.17  |
| <i>lpg2207</i> | conserved hypothetical protein                                         | Unknown / hypothetical proteins                  | 9.339  | 9.116  | 11.114 | 8.792    | 7.39E-01 | 2.24E-02 | -0.22 | -2.32 |
| <i>lpg2207</i> | conserved hypothetical protein                                         | Unknown / hypothetical proteins                  | 9.534  | 9.072  | 10.879 | 8.942    | 4.88E-01 | 4.89E-02 | -0.46 | -1.94 |
| <i>lpg2208</i> | zinc binding dehydrogenase (zinc binding oxidoreductase) (quinone c    | Carbohydrate Metabolism, Lipid Metab             | 12.041 | 13.221 | 11.218 | 12.738   | 2.34E-02 | 1.53E-03 | 1.18  | 1.52  |
| <i>lpg2208</i> | zinc binding dehydrogenase (zinc binding oxidoreductase) (quinone c    | Carbohydrate Metabolism, Lipid Metab             | 12.174 | 13.309 | 11.096 | 12.832   | 2.35E-02 | 8.50E-04 | 1.14  | 1.74  |
| <i>lpg2209</i> | hypothetical (phosphatidylethanolamine-binding protein?)               | Transport and binding                            | 9.574  | 8.505  | 11.532 | 6.013    | 3.66E-01 | 1.09E-03 | -1.07 | -5.52 |
| <i>lpg2209</i> | hypothetical (phosphatidylethanolamine-binding protein?)               | Transport and binding                            | 8.686  | 8.239  | 10.916 | 7.57E-01 | 7.57E-01 | -0.45    | -0.45 | -0.45 |
| <i>lpg2210</i> | hypothetical                                                           | Unknown / hypothetical proteins                  | 9.723  | 9.579  | 10.629 | 10.271   | 7.24E-01 | 6.37E-01 | -0.14 | -0.36 |
| <i>lpg2210</i> | hypothetical                                                           | Unknown / hypothetical proteins                  | 9.687  | 9.575  | 10.636 | 10.747   | 8.27E-01 | 8.10E-01 | -0.11 | 0.11  |
| <i>lpg2211</i> | uncharacterized conserved hypothetical protein COG0432                 | Unknown / hypothetical proteins                  | 11.524 | 12.654 | 11.319 | 12.836   | 1.32E-02 | 1.20E-03 | 1.13  | 1.52  |
| <i>lpg2211</i> | uncharacterized conserved hypothetical protein COG0432                 | Unknown / hypothetical proteins                  | 11.527 | 12.652 | 11.316 | 12.863   | 1.93E-02 | 6.10E-04 | 1.12  | 1.55  |
| <i>lpg2212</i> | acetylpolymine aminohydolase                                           | <i>bcp</i> Protein fate / hydrolases / secretion | 8.982  | 8.908  | 10.037 | 8.153    | 8.93E-01 | 3.52E-03 | -0.07 | -1.88 |
| <i>lpg2212</i> | acetylpolymine aminohydolase                                           | <i>bcp</i> Protein fate / hydrolases / secretion | 8.487  | 8.423  | 9.796  | 8.906    | 8.98E-01 | 3.49E-02 | -0.06 | -0.89 |
| <i>lpg2213</i> | hemin binding protein Hbp                                              | Transport and binding                            | 14.726 | 15.414 | 12.668 | 15.507   | 2.89E-01 | 9.37E-04 | 0.69  | 2.84  |
| <i>lpg2213</i> | hemin binding protein Hbp                                              | Transport and binding                            | 14.594 | 15.383 | 12.698 | 15.545   | 2.12E-01 | 3.82E-04 | 0.79  | 2.85  |
| <i>lpg2214</i> | nucleoside-diphosphate sugar epimerase (cell division inhibitor)       | Chemotaxis / motility / cell division, Siç       | 12.445 | 12.519 | 12.664 | 12.269   | 5.26E-01 | 3.84E-03 | 0.07  | -0.39 |
| <i>lpg2214</i> | nucleoside-diphosphate sugar epimerase (cell division inhibitor)       | Chemotaxis / motility / cell division, Siç       | 12.453 | 12.397 | 12.594 | 12.256   | 7.11E-01 | 1.44E-02 | -0.06 | -0.34 |
| <i>lpg2215</i> | RIKEN cDNA G431002C21 gene                                             | <i>legA2</i> Unknown / hypothetical proteins     | 9.894  | 9.255  | 9.921  | 9.416    | 1.74E-01 | 2.78E-01 | -0.64 | -0.50 |
| <i>lpg2215</i> | RIKEN cDNA G431002C21 gene                                             | <i>legA2</i> Unknown / hypothetical proteins     | 9.423  | 9.608  | 10.349 | 9.847    | 5.57E-01 | 2.90E-01 | 0.19  | -0.50 |
| <i>lpg2216</i> | purine NTPase, putative                                                | Nucleotide Metabolism                            | 10.907 | 11.110 | 11.568 | 9.184    | 4.66E-01 | 9.06E-06 | 0.20  | -2.38 |
| <i>lpg2216</i> | purine NTPase, putative                                                | Nucleotide Metabolism                            | 10.850 | 11.237 | 11.496 | 9.479    | 9.08E-02 | 6.61E-04 | 0.39  | -2.02 |
| <i>lpg2217</i> | chitinase domain (two component system sensor kinase) (sugar hydr      | Signal transduction / other regulatory f         | 9.966  | 11.183 | 11.572 | 9.741    | 5.81E-03 | 5.86E-04 | 1.22  | -1.83 |
| <i>lpg2217</i> | chitinase domain (two component system sensor kinase) (sugar hydr      | Signal transduction / other regulatory f         | 9.923  | 10.997 | 11.526 | 9.909    | 1.19E-02 | 9.98E-04 | 1.07  | -1.62 |
| <i>lpg2218</i> | choline monoxygenase (benzene 1,2-dioxygenase a subunit)               | Biodegradation of Xenobiotics                    | 11.045 | 12.211 | 11.369 | 11.620   | 1.31E-03 | 3.81E-01 | 1.17  | 0.25  |
| <i>lpg2218</i> | choline monoxygenase (benzene 1,2-dioxygenase a subunit)               | Biodegradation of Xenobiotics                    | 11.029 | 12.853 | 11.439 | 12.125   | 7.38E-03 | 2.98E-01 | 1.82  | 0.69  |
| <i>lpg2219</i> | conserved hypothetical protein                                         | Unknown / hypothetical proteins                  | 11.086 | 11.387 | 10.373 | 10.129   | 3.07E-01 | 3.70E-01 | 0.30  | -0.24 |
| <i>lpg2219</i> | conserved hypothetical protein                                         | Unknown / hypothetical proteins                  | 11.164 | 11.472 | 10.279 | 10.175   | 2.92E-01 | 6.38E-01 | 0.31  | -0.10 |
| <i>lpg2220</i> | ORF                                                                    | ORFs of unknown function (unique)                | 11.152 | 11.164 | 10.884 | 10.123   | 9.82E-01 | 1.89E-01 | 0.01  | -0.76 |
| <i>lpg2220</i> | ORF                                                                    | ORFs of unknown function (unique)                | 10.985 | 11.150 | 10.692 | 10.152   | 7.02E-01 | 2.72E-01 | 0.17  | -0.54 |
| <i>lpg2221</i> | ORF                                                                    | ORFs of unknown function (unique)                | 11.683 | 11.844 | 12.179 | 11.341   | 7.67E-01 | 3.52E-01 | 0.16  | -0.84 |
| <i>lpg2221</i> | ORF                                                                    | ORFs of unknown function (unique)                | 11.595 | 11.987 | 12.185 | 11.650   | 4.88E-01 | 4.41E-01 | 0.39  | -0.54 |
| <i>lpg2222</i> | TPR repeat protein, protein-protein interaction                        | Signal transduction / other regulatory f         | 11.747 | 14.028 | 14.989 | 11.014   | 1.09E-02 | 1.92E-04 | 2.28  | -3.97 |
| <i>lpg2222</i> | TPR repeat protein, protein-protein interaction                        | Signal transduction / other regulatory f         | 11.728 | 14.004 | 14.824 | 10.970   | 1.09E-02 | 5.32E-04 | 2.28  | -3.85 |
| <i>lpg2223</i> | ORF                                                                    | ORFs of unknown function (unique)                | 11.420 | 12.360 | 12.187 | 11.674   | 3.95E-02 | 1.71E-01 | 0.94  | -0.51 |
| <i>lpg2223</i> | ORF                                                                    | ORFs of unknown function (unique)                | 11.418 | 12.339 | 12.177 | 11.708   | 7.03E-02 | 1.97E-01 | 0.92  | -0.47 |
| <i>lpg2224</i> | UVB-resistance protein UVR8                                            | Named proteins of general function               | 9.544  | 9.848  | 9.941  | 9.222    | 4.69E-01 | 2.52E-01 | 0.30  | -0.72 |
| <i>lpg2224</i> | UVB-resistance protein UVR8                                            | Named proteins of general function               | 9.745  | 10.889 | 9.703  | 10.802   | 2.42E-01 | 2.74E-01 | 1.14  | 1.10  |
| <i>lpg2225</i> | expressed protein (GH3 homolog) (auxin-regulated protein)              | Named proteins of general function               | 10.296 | 10.427 | 10.933 | 10.848   | 3.32E-01 | 7.14E-01 | 0.13  | -0.08 |
| <i>lpg2225</i> | expressed protein (GH3 homolog) (auxin-regulated protein)              | Named proteins of general function               | 10.650 | 11.915 | 11.347 | 12.555   | 9.63E-03 | 2.51E-02 | 1.27  | 1.21  |

|                |                                                                                                                           |        |        |        |        |          |          |       |       |
|----------------|---------------------------------------------------------------------------------------------------------------------------|--------|--------|--------|--------|----------|----------|-------|-------|
| <i>lpg2226</i> | isovaleryl CoA dehydrogenase (non-ribosomal peptide synthase) (acy Amino Acid Metabolism                                  | 10.096 | 9.596  | 10.500 | 10.502 | 2.01E-01 | 9.96E-01 | -0.50 | 0.00  |
| <i>lpg2226</i> | isovaleryl CoA dehydrogenase (non-ribosomal peptide synthase) (acy Amino Acid Metabolism                                  | 9.944  | 9.241  | 10.242 | 10.441 | 1.07E-01 | 6.06E-01 | -0.70 | 0.20  |
| <i>lpg2227</i> | acetyl CoA carboxylase alpha subunit (propionyl CoA carboxylase beta Amino Acid Metabolism, Carbohydrate                  | 10.402 | 11.263 | 11.340 | 11.645 | 4.72E-02 | 5.80E-01 | 0.86  | 0.31  |
| <i>lpg2227</i> | acetyl CoA carboxylase alpha subunit (propionyl CoA carboxylase beta Amino Acid Metabolism, Carbohydrate                  | 10.403 | 11.224 | 11.297 | 11.663 | 5.79E-02 | 4.94E-01 | 0.82  | 0.37  |
| <i>lpg2228</i> | 3-oxoacyl (acyl carrier protein) synthase III Lipid Metabolism                                                            | 9.926  | 10.203 | 10.739 | 10.132 | 1.90E-01 | 3.31E-01 | 0.28  | -0.61 |
| <i>lpg2228</i> | 3-oxoacyl (acyl carrier protein) synthase III Lipid Metabolism                                                            | 9.870  | 9.859  | 10.887 | 10.301 | 9.68E-01 | 2.69E-01 | -0.01 | -0.59 |
| <i>lpg2229</i> | saframycin Mx1 synthetase B (acyl CoA synthase) (nonribosomal peptide Biosynthesis of Secondary Metabolites               | 9.771  | 11.479 | 10.973 | 11.827 | 8.01E-03 | 9.86E-02 | 1.71  | 0.85  |
| <i>lpg2229</i> | saframycin Mx1 synthetase B (acyl CoA synthase) (nonribosomal peptide Biosynthesis of Secondary Metabolites               | 10.425 | 12.817 | 11.656 | 12.898 | 7.29E-03 | 9.47E-02 | 2.39  | 1.24  |
| <i>lpg2230</i> | acyl CoA ligase (long chain fatty acid CoA ligase) (O succinyl benzoic Lipid Metabolism                                   | 10.320 | 10.649 | 11.840 | 11.145 | 3.30E-01 | 9.81E-02 | 0.33  | -0.69 |
| <i>lpg2230</i> | acyl CoA ligase (long chain fatty acid CoA ligase) (O succinyl benzoic Lipid Metabolism                                   | 10.722 | 11.295 | 11.976 | 11.816 | 1.47E-01 | 7.08E-01 | 0.57  | -0.16 |
| <i>lpg2231</i> | 3-oxoacyl reductase (short chain dehydrogenase/reductase <i>fabG</i> ) Lipid Metabolism                                   | 10.615 | 9.956  | 11.921 | 11.041 | 3.17E-02 | 3.05E-03 | -0.66 | -0.88 |
| <i>lpg2231</i> | 3-oxoacyl reductase (short chain dehydrogenase/reductase <i>fabG</i> ) Lipid Metabolism                                   | 10.667 | 9.892  | 11.934 | 11.142 | 3.33E-02 | 1.81E-02 | -0.78 | -0.79 |
| <i>lpg2232</i> | 3-oxoacyl-(acyl carrier protein) synthase III ( <i>FabH</i> ) <i>fabH</i> Lipid Metabolism                                | 9.980  | 10.304 | 10.828 | 10.705 | 3.14E-01 | 7.47E-01 | 0.32  | -0.12 |
| <i>lpg2232</i> | 3-oxoacyl-(acyl carrier protein) synthase III ( <i>FabH</i> ) <i>fabH</i> Lipid Metabolism                                | 9.906  | 10.502 | 10.663 | 10.797 | 6.86E-02 | 7.19E-01 | 0.60  | 0.13  |
| <i>lpg2233</i> | acyl carrier protein Named proteins of general function                                                                   | 11.942 | 12.374 | 10.532 | 12.338 | 1.64E-01 | 8.78E-03 | 0.43  | 1.81  |
| <i>lpg2233</i> | acyl carrier protein Named proteins of general function                                                                   | 11.927 | 12.354 | 10.408 | 12.505 | 8.90E-02 | 2.24E-03 | 0.43  | 2.10  |
| <i>lpg2234</i> | multidrug resistance protein D (drug resistance transporter Bcr/CflA) Transport and binding                               | 10.834 | 10.620 | 10.327 | 10.918 | 7.39E-01 | 2.37E-01 | -0.21 | 0.59  |
| <i>lpg2234</i> | multidrug resistance protein D (drug resistance transporter Bcr/CflA) Transport and binding                               | 10.815 | 10.426 | 10.229 | 10.973 | 3.72E-01 | 1.19E-01 | -0.39 | 0.74  |
| <i>lpg2235</i> | sterol desaturase Lipid Metabolism                                                                                        | 9.923  | 9.800  | 9.160  | 9.720  | 6.51E-01 | 1.98E-01 | -0.12 | 0.56  |
| <i>lpg2235</i> | sterol desaturase Lipid Metabolism                                                                                        | 10.005 | 9.785  | 9.006  | 9.675  | 1.65E-01 | 3.27E-01 | -0.22 | 0.67  |
| <i>lpg2236</i> | nitric oxide reductase, (subunit B) Energy Metabolism                                                                     | 10.057 | 9.732  | 11.218 | 9.906  | 6.71E-01 | 1.58E-01 | -0.32 | -1.31 |
| <i>lpg2236</i> | nitric oxide reductase, (subunit B) Energy Metabolism                                                                     | 10.109 | 9.731  | 10.952 | 9.654  | 4.77E-01 | 2.51E-01 | -0.38 | -1.30 |
| <i>lpg2237</i> | multidrug resistance ABC transporter ATP-binding protein <i>abcT3</i> Transport and binding                               | 12.226 | 11.239 | 12.952 | 11.186 | 4.86E-02 | 4.31E-03 | -0.99 | -1.77 |
| <i>lpg2237</i> | multidrug resistance ABC transporter ATP-binding protein <i>abcT3</i> Transport and binding                               | 12.316 | 12.126 | 12.926 | 11.905 | 7.14E-01 | 3.34E-02 | -0.19 | -1.02 |
| <i>lpg2238</i> | transmembrane protein Unknown / hypothetical proteins                                                                     | 11.775 | 10.683 | 11.041 | 10.588 | 4.95E-02 | 3.68E-01 | -1.09 | -0.45 |
| <i>lpg2238</i> | transmembrane protein Unknown / hypothetical proteins                                                                     | 12.329 | 10.713 | 10.990 | 10.658 | 4.21E-03 | 4.13E-01 | -1.62 | -0.33 |
| <i>lpg2239</i> | ORF ORFs of unknown function (unique)                                                                                     | 8.516  | 5.799  | 11.866 | 7.588  | 8.69E-02 | 6.03E-04 | -2.72 | -4.28 |
| <i>lpg2239</i> | ORF ORFs of unknown function (unique)                                                                                     | 8.330  | 8.253  | 11.707 | 8.032  | 9.50E-01 | 5.86E-03 | -0.08 | -3.67 |
| <i>lpg2240</i> | dipeptidyl aminopeptidase/acylaminoacyl peptidase Protein fate / hydrolases / secretion                                   | 11.063 | 12.263 | 10.943 | 12.208 | 6.60E-03 | 2.43E-03 | 1.20  | 1.26  |
| <i>lpg2240</i> | dipeptidyl aminopeptidase/acylaminoacyl peptidase Protein fate / hydrolases / secretion                                   | 11.273 | 12.304 | 10.892 | 12.161 | 3.63E-04 | 1.43E-03 | 1.03  | 1.27  |
| <i>lpg2241</i> | GTP cyclohydrolase II; riboflavin biosynthesis Metabolism of Cofactors and Vitamins                                       | 9.751  | 10.846 | 10.915 | 9.554  | 3.01E-02 | 8.83E-04 | 1.09  | -1.36 |
| <i>lpg2241</i> | GTP cyclohydrolase II; riboflavin biosynthesis Metabolism of Cofactors and Vitamins                                       | 10.134 | 10.604 | 11.068 | 9.919  | 3.62E-01 | 1.73E-03 | 0.47  | -1.15 |
| <i>lpg2242</i> | hypothetical Unknown / hypothetical proteins                                                                              | 9.885  | 10.274 | 10.037 | 10.076 | 1.91E-01 | 9.16E-01 | 0.39  | 0.04  |
| <i>lpg2242</i> | hypothetical Unknown / hypothetical proteins                                                                              | 10.725 | 10.271 | 9.922  | 10.086 | 6.27E-01 | 7.75E-01 | -0.45 | 0.16  |
| <i>lpg2243</i> | uracil phosphoribosyltransferase (UMP pyrophosphorylase) Nucleotide Metabolism                                            | 10.517 | 10.509 | 10.362 | 9.937  | 9.85E-01 | 3.84E-01 | -0.01 | -0.43 |
| <i>lpg2243</i> | uracil phosphoribosyltransferase (UMP pyrophosphorylase) Nucleotide Metabolism                                            | 10.667 | 11.192 | 10.309 | 10.799 | 4.73E-01 | 5.78E-01 | 0.52  | 0.49  |
| <i>lpg2244</i> | ORF ORFs of unknown function (unique)                                                                                     | 9.122  | 9.459  | 10.255 | 8.425  | 4.65E-01 | 1.48E-02 | 0.34  | -1.83 |
| <i>lpg2244</i> | ORF ORFs of unknown function (unique)                                                                                     | 8.809  | 9.107  | 9.995  | 8.555  | 5.48E-01 | 1.87E-02 | 0.30  | -1.44 |
| <i>lpg2245</i> | C4-dicarboxylate transport protein (Na <sup>+</sup> /H <sup>+</sup> dicarboxylate <i>dctA</i> ) Transport and binding     | 10.507 | 12.359 | 11.912 | 10.278 | 1.03E-02 | 8.16E-03 | 1.85  | -1.63 |
| <i>lpg2245</i> | C4-dicarboxylate transport protein (Na <sup>+</sup> /H <sup>+</sup> dicarboxylate <i>dctA</i> ) Transport and binding     | 10.508 | 12.773 | 11.868 | 10.584 | 1.49E-03 | 2.57E-02 | 2.27  | -1.28 |
| <i>lpg2246</i> | ORF ORFs of unknown function (unique)                                                                                     | 9.284  | 11.748 | 13.710 | 8.749  | 2.95E-02 | 9.15E-04 | 2.46  | -4.96 |
| <i>lpg2246</i> | ORF ORFs of unknown function (unique)                                                                                     | 10.157 | 11.740 | 13.858 | 9.203  | 8.80E-02 | 3.66E-04 | 1.58  | -4.65 |
| <i>lpg2247</i> | DedA family protein (integral membrane protein) Named proteins of general function                                        | 10.262 | 9.530  | 9.351  | 7.944  | 8.86E-02 | 2.43E-01 | -0.73 | -1.41 |
| <i>lpg2247</i> | DedA family protein (integral membrane protein) Named proteins of general function                                        | 10.484 | 9.097  | 9.078  | 8.167  | 5.22E-03 | 1.41E-01 | -1.39 | -0.91 |
| <i>lpg2248</i> | ORF ORFs of unknown function (unique)                                                                                     | 11.173 | 13.505 | 12.657 | 11.502 | 1.10E-02 | 2.43E-02 | 2.33  | -1.16 |
| <i>lpg2248</i> | ORF ORFs of unknown function (unique)                                                                                     | 11.138 | 13.503 | 12.670 | 11.775 | 8.68E-03 | 8.64E-03 | 2.37  | -0.89 |
| <i>lpg2249</i> | glutamine amidotransferase, class I (glutamine synthetase) Nucleotide Metabolism                                          | 10.623 | 10.666 | 9.796  | 10.364 | 8.80E-01 | 4.01E-01 | 0.04  | 0.57  |
| <i>lpg2249</i> | glutamine amidotransferase, class I (glutamine synthetase) Nucleotide Metabolism                                          | 10.548 | 11.049 | 10.062 | 11.116 | 6.95E-02 | 7.66E-02 | 0.50  | 1.05  |
| <i>lpg2250</i> | alcohol dehydrogenase, iron containing (NAD dependent 4-hydroxybutyrate Carbohydrate Metabolism, Lipid Metabolism         | 9.228  | 9.998  | 9.216  | 10.242 | 6.90E-02 | 1.00E-01 | 0.77  | 1.03  |
| <i>lpg2250</i> | alcohol dehydrogenase, iron containing (NAD dependent 4-hydroxybutyrate Carbohydrate Metabolism, Lipid Metabolism         | 8.744  | 9.882  | 9.320  | 10.380 | 2.24E-02 | 5.54E-02 | 1.14  | 1.06  |
| <i>lpg2251</i> | succinate semialdehyde dehydrogenase (aldehyde dehydrogenase) Carbohydrate Metabolism, Amino Acid                         | 9.114  | 8.365  | 8.425  | 9.020  | 1.99E-01 | 3.35E-01 | -0.75 | 0.59  |
| <i>lpg2251</i> | succinate semialdehyde dehydrogenase (aldehyde dehydrogenase) Carbohydrate Metabolism, Amino Acid                         | 8.934  | 8.900  | 8.491  | 9.574  | 9.56E-01 | 1.07E-01 | -0.03 | 1.08  |
| <i>lpg2252</i> | glutamine synthetase Energy Metabolism, Amino Acid Metabolism                                                             | 10.721 | 9.041  | 10.014 | 9.782  | 9.25E-04 | 5.91E-01 | -1.68 | -0.23 |
| <i>lpg2252</i> | glutamine synthetase Energy Metabolism, Amino Acid Metabolism                                                             | 10.550 | 9.762  | 9.641  | 10.208 | 2.90E-01 | 4.04E-01 | -0.79 | 0.57  |
| <i>lpg2253</i> | hypothetical Unknown / hypothetical proteins                                                                              | 11.787 | 11.974 | 12.707 | 12.512 | 7.49E-01 | 6.98E-01 | 0.19  | -0.20 |
| <i>lpg2253</i> | hypothetical Unknown / hypothetical proteins                                                                              | 11.358 | 11.839 | 11.213 | 12.371 | 3.48E-01 | 4.20E-02 | 0.48  | 1.16  |
| <i>lpg2254</i> | conserved hypothetical protein Unknown / hypothetical proteins                                                            | 12.298 | 10.866 | 10.264 | 11.365 | 6.61E-02 | 5.39E-02 | -1.43 | 1.10  |
| <i>lpg2254</i> | conserved hypothetical protein Unknown / hypothetical proteins                                                            | 12.469 | 10.909 | 10.075 | 11.226 | 1.69E-02 | 7.27E-02 | -1.56 | 1.15  |
| <i>lpg2255</i> | ORF ORFs of unknown function (unique)                                                                                     | 14.822 | 14.483 | 14.900 | 12.100 | 4.23E-01 | 4.05E-06 | -0.34 | -2.80 |
| <i>lpg2255</i> | ORF ORFs of unknown function (unique)                                                                                     | 14.975 | 14.455 | 14.936 | 12.148 | 2.43E-01 | 5.02E-06 | -0.52 | -2.79 |
| <i>lpg2256</i> | metallo-beta-lactamase superfamily protein (cleavage and polyadenylation DNA/RNA degradation / restriction, Transcription | 10.440 | 10.252 | 11.551 | 10.595 | 5.68E-01 | 4.46E-03 | -0.19 | -0.96 |
| <i>lpg2256</i> | metallo-beta-lactamase superfamily protein (cleavage and polyadenylation DNA/RNA degradation / restriction, Transcription | 10.532 | 10.606 | 11.647 | 10.717 | 7.28E-01 | 9.50E-03 | 0.07  | -0.93 |
| <i>lpg2257</i> | ORF ORFs of unknown function (unique)                                                                                     | 10.367 | 9.994  | 13.043 | 9.625  | 6.97E-01 | 8.54E-03 | -0.37 | -3.42 |
| <i>lpg2257</i> | ORF ORFs of unknown function (unique)                                                                                     | 10.291 | 9.702  | 13.076 | 9.867  | 5.33E-01 | 1.00E-02 | -0.59 | -3.21 |

|                |                                                                         |             |                                           |        |        |        |        |          |          |       |       |
|----------------|-------------------------------------------------------------------------|-------------|-------------------------------------------|--------|--------|--------|--------|----------|----------|-------|-------|
| <i>lpg2258</i> | small ORF (96aa) hypothetical                                           |             | Unknown / hypothetical proteins           | 10.268 | 9.909  | 12.698 | 9.903  | 5.75E-01 | 5.62E-03 | -0.36 | -2.79 |
| <i>lpg2258</i> | small ORF (96aa) hypothetical                                           |             | Unknown / hypothetical proteins           | 10.333 | 9.460  | 12.693 | 10.031 | 2.17E-01 | 4.52E-03 | -0.87 | -2.66 |
| <i>lpg2259</i> | periplasmic, osmotically inducible protein?                             | <i>osmY</i> | Detoxification / adaptation               | 13.230 | 12.705 | 12.411 | 12.280 | 1.52E-01 | 7.05E-01 | -0.52 | -0.13 |
| <i>lpg2259</i> | periplasmic, osmotically inducible protein?                             | <i>osmY</i> | Detoxification / adaptation               | 13.140 | 12.818 | 12.325 | 12.352 | 3.46E-01 | 9.30E-01 | -0.32 | 0.03  |
| <i>lpg2260</i> | PHA synthase (polyhydroxyalkanoic synthase) (poly-3-hy <i>phbC</i> )    |             | Named proteins of general function        | 11.455 | 11.830 | 12.034 | 11.858 | 4.14E-01 | 6.03E-01 | 0.37  | -0.18 |
| <i>lpg2260</i> | PHA synthase (polyhydroxyalkanoic synthase) (poly-3-hy <i>phbC</i> )    |             | Named proteins of general function        | 11.047 | 11.805 | 11.860 | 11.759 | 1.31E-01 | 7.79E-01 | 0.76  | -0.10 |
| <i>lpg2261</i> | phosphate acetyl/butyryltransferase family protein) includes: (de)hydr  |             | Carbohydrate Metabolism                   | 11.203 | 11.485 | 12.404 | 11.129 | 5.20E-01 | 8.19E-03 | 0.28  | -1.27 |
| <i>lpg2261</i> | phosphate acetyl/butyryltransferase family protein) includes: (de)hydr  |             | Carbohydrate Metabolism                   | 11.135 | 11.472 | 12.370 | 11.117 | 4.32E-01 | 1.57E-02 | 0.34  | -1.25 |
| <i>lpg2262</i> | acetate kinase (acetokinase) (acetate and butyrate kinas <i>ackA2</i> ) |             | Metabolism of Other Amino Acids, Car      | 10.689 | 10.788 | 11.576 | 10.417 | 8.53E-01 | 1.07E-02 | 0.10  | -1.16 |
| <i>lpg2262</i> | acetate kinase (acetokinase) (acetate and butyrate kinas <i>ackA2</i> ) |             | Metabolism of Other Amino Acids, Car      | 10.640 | 11.269 | 11.590 | 10.979 | 2.00E-01 | 1.65E-01 | 0.63  | -0.61 |
| <i>lpg2263</i> | curved DNA binding protein (DnaJ N-terminal domain:Dn <i>cbpA</i> )     |             | Protein fate / hydrolases / secretion, Ti | 8.549  | 9.970  | 8.898  | 9.753  | 6.31E-02 | 3.13E-02 | 1.42  | 0.85  |
| <i>lpg2263</i> | curved DNA binding protein (DnaJ N-terminal domain:Dn <i>cbpA</i> )     |             | Protein fate / hydrolases / secretion, Ti | 7.102  | 9.103  | 8.740  | 9.595  | 7.50E-02 | 1.33E-01 | 2.00  | 0.86  |
| <i>lpg2264</i> | small ORF (104aa) hypothetical (MerR family bacterial regulator? trar   |             | Transcription factors / DNA binding prc   | 8.171  | 8.501  | 9.821  | 8.338  | 7.19E-01 | 1.74E-01 | 0.33  | -1.48 |
| <i>lpg2264</i> | small ORF (104aa) hypothetical (MerR family bacterial regulator? trar   |             | Transcription factors / DNA binding prc   | 9.069  | 8.931  | 9.669  | 8.706  | 8.84E-01 | 2.30E-01 | -0.14 | -0.96 |
| <i>lpg2265</i> | acyltransferase                                                         |             | Named proteins of general function        | 9.211  | 10.196 | 9.673  | 10.022 | 1.56E-04 | 2.89E-01 | 0.98  | 0.35  |
| <i>lpg2265</i> | acyltransferase                                                         |             | Named proteins of general function        | 9.006  | 10.471 | 9.708  | 10.429 | 1.24E-02 | 1.71E-01 | 1.46  | 0.72  |
| <i>lpg2266</i> | conserved hypothetical protein                                          |             | Unknown / hypothetical proteins           | 8.751  | 9.003  | 9.375  | 9.321  | 7.85E-01 | 8.94E-01 | 0.25  | -0.05 |
| <i>lpg2266</i> | conserved hypothetical protein                                          |             | Unknown / hypothetical proteins           | 9.047  | 9.392  | 9.318  | 9.608  | 4.89E-01 | 4.95E-01 | 0.34  | 0.29  |
| <i>lpg2267</i> | prolidase (aryldialkylphosphatase) (Xaa-pro dipeptidase)                |             | Protein fate / hydrolases / secretion     | 8.344  | 8.808  | 9.180  | 8.201  | 4.17E-01 | 1.24E-01 | 0.46  | -0.98 |
| <i>lpg2267</i> | prolidase (aryldialkylphosphatase) (Xaa-pro dipeptidase)                |             | Protein fate / hydrolases / secretion     | 8.080  | 8.611  | 8.815  | 8.340  | 2.87E-01 | 6.13E-01 | 0.53  | -0.47 |
| <i>lpg2268</i> | ORF                                                                     |             | ORFs of unknown function (unique)         | 9.954  | 9.365  | 13.061 | 9.071  | 5.27E-01 | 8.70E-04 | -0.59 | -3.99 |
| <i>lpg2268</i> | ORF                                                                     |             | ORFs of unknown function (unique)         | 10.176 | 9.346  | 13.068 | 9.353  | 3.50E-01 | 1.06E-03 | -0.83 | -3.72 |
| <i>lpg2269</i> | hypothetical (includes LidB and unknown) ?                              |             | Named proteins of general function        | 11.691 | 11.149 | 12.269 | 11.783 | 2.53E-02 | 7.39E-02 | -0.54 | -0.49 |
| <i>lpg2269</i> | hypothetical (includes LidB and unknown) ?                              |             | Named proteins of general function        | 11.678 | 11.015 | 12.181 | 11.729 | 2.67E-02 | 1.01E-01 | -0.66 | -0.45 |
| <i>lpg2270</i> | oxidoreductase (NAD-dependent epimerase/dehydratase)                    |             | Named proteins of general function        | 11.117 | 10.498 | 11.491 | 11.141 | 4.42E-01 | 6.85E-01 | -0.62 | -0.35 |
| <i>lpg2270</i> | oxidoreductase (NAD-dependent epimerase/dehydratase)                    |             | Named proteins of general function        | 10.132 | 10.070 | 10.877 | 10.864 | 8.87E-01 | 9.56E-01 | -0.06 | -0.01 |
| <i>lpg2271</i> | ORF                                                                     |             | ORFs of unknown function (unique)         | 11.412 | 11.793 | 10.142 | 11.181 | 7.00E-01 | 1.32E-01 | 0.38  | 1.04  |
| <i>lpg2271</i> | ORF                                                                     |             | ORFs of unknown function (unique)         | 11.614 | 12.511 | 10.167 | 11.384 | 3.70E-02 | 2.27E-02 | 0.90  | 1.22  |
| <i>lpg2272</i> | transmembrane protein                                                   |             | Unknown / hypothetical proteins           | 11.368 | 10.635 | 11.640 | 10.305 | 2.01E-01 | 5.88E-02 | -0.73 | -1.34 |
| <i>lpg2272</i> | transmembrane protein                                                   |             | Unknown / hypothetical proteins           | 10.698 | 11.200 | 11.154 | 11.143 | 2.15E-01 | 9.87E-01 | 0.50  | -0.01 |
| <i>lpg2273</i> | glycerol-3-phosphate binding periplasmic protein (sn-glyc <i>ugpB</i> ) |             | Transport and binding                     | 10.411 | 10.786 | 9.808  | 10.721 | 5.64E-01 | 2.66E-02 | 0.37  | 0.91  |
| <i>lpg2273</i> | glycerol-3-phosphate binding periplasmic protein (sn-glyc <i>ugpB</i> ) |             | Transport and binding                     | 10.610 | 10.153 | 9.202  | 10.592 | 1.74E-01 | 4.74E-02 | -0.46 | 1.39  |
| <i>lpg2274</i> | glycerophosphoryl diester esterase (glycerophosphoryldi <i>ugpQ</i> )   |             | Metabolism of Complex Lipids              | 10.754 | 11.053 | 9.803  | 11.113 | 5.95E-01 | 8.06E-02 | 0.30  | 1.31  |
| <i>lpg2274</i> | glycerophosphoryl diester esterase (glycerophosphoryldi <i>ugpQ</i> )   |             | Metabolism of Complex Lipids              | 10.850 | 11.305 | 9.322  | 11.282 | 4.46E-01 | 9.70E-02 | 0.46  | 1.96  |
| <i>lpg2275</i> | hypothetical                                                            |             | Unknown / hypothetical proteins           | 11.543 | 11.533 | 11.674 | 11.642 | 9.90E-01 | 8.41E-01 | -0.01 | -0.03 |
| <i>lpg2275</i> | hypothetical                                                            |             | Unknown / hypothetical proteins           | 11.472 | 11.867 | 11.598 | 11.572 | 4.59E-01 | 8.79E-01 | 0.40  | -0.03 |
| <i>lpg2276</i> | Glu/Leu/Phe/Val dehydrogenase (leucine dehydrogenase)                   |             | Amino Acid Metabolism                     | 13.666 | 13.719 | 12.109 | 13.395 | 9.50E-01 | 2.79E-01 | 0.05  | 1.29  |
| <i>lpg2276</i> | Glu/Leu/Phe/Val dehydrogenase (leucine dehydrogenase)                   |             | Amino Acid Metabolism                     | 13.638 | 13.549 | 12.130 | 13.730 | 9.29E-01 | 7.38E-02 | -0.09 | 1.60  |
| <i>lpg2277</i> | O-methyltransferase, SAM-dependent                                      |             | Metabolism of Cofactors and Vitamins      | 12.149 | 12.863 | 10.962 | 13.036 | 1.81E-01 | 1.11E-03 | 0.71  | 2.07  |
| <i>lpg2277</i> | O-methyltransferase, SAM-dependent                                      |             | Metabolism of Cofactors and Vitamins      | 12.038 | 12.934 | 10.898 | 13.113 | 1.63E-01 | 1.14E-03 | 0.90  | 2.22  |
| <i>lpg2278</i> | 4-hydroxyphenylpyruvate dioxygenase (legiolysin) oxidor <i>hpd</i>      |             | Amino Acid Metabolism                     | 13.072 | 13.519 | 11.835 | 13.118 | 5.09E-01 | 1.98E-01 | 0.45  | 1.28  |
| <i>lpg2278</i> | 4-hydroxyphenylpyruvate dioxygenase (legiolysin) oxidor <i>hpd</i>      |             | Amino Acid Metabolism                     | 13.270 | 13.824 | 11.863 | 13.487 | 1.72E-01 | 2.88E-02 | 0.55  | 1.62  |
| <i>lpg2279</i> | fumarylacetoacetate hydrolase (aromatic amino acid degradation prot     |             | Amino Acid Metabolism                     | 12.663 | 13.319 | 11.782 | 13.348 | 6.15E-02 | 2.06E-02 | 0.66  | 1.57  |
| <i>lpg2279</i> | fumarylacetoacetate hydrolase (aromatic amino acid degradation prot     |             | Amino Acid Metabolism                     | 12.426 | 13.046 | 11.337 | 13.089 | 9.36E-02 | 6.07E-03 | 0.62  | 1.75  |
| <i>lpg2280</i> | glutathione S-transferase                                               |             | Amino Acid Metabolism, Biodegradatic      | 11.554 | 10.506 | 9.863  | 10.668 | 1.76E-02 | 6.21E-02 | -1.05 | 0.80  |
| <i>lpg2280</i> | glutathione S-transferase                                               |             | Amino Acid Metabolism, Biodegradatic      | 11.571 | 10.977 | 9.870  | 10.931 | 3.28E-01 | 6.66E-02 | -0.59 | 1.06  |
| <i>lpg2281</i> | ORF                                                                     |             | ORFs of unknown function (unique)         | 9.468  | 10.221 | 9.879  | 10.195 | 6.04E-02 | 4.09E-01 | 0.75  | 0.32  |
| <i>lpg2281</i> | ORF                                                                     |             | ORFs of unknown function (unique)         | 9.607  | 10.330 | 9.904  | 10.317 | 6.52E-03 | 2.60E-01 | 0.72  | 0.41  |
| <i>lpg2282</i> | asparaginyl tRNA synthetase                                             | <i>asnS</i> | Amino Acid Metabolism, Translation        | 12.262 | 12.281 | 10.191 | 12.835 | 9.62E-01 | 5.98E-04 | 0.02  | 2.64  |
| <i>lpg2282</i> | asparaginyl tRNA synthetase                                             | <i>asnS</i> | Amino Acid Metabolism, Translation        | 12.342 | 12.254 | 9.653  | 12.814 | 7.73E-01 | 7.22E-04 | -0.09 | 3.16  |
| <i>lpg2283</i> | small ORF (132aa)                                                       |             | ORFs of unknown function (unique)         | 13.121 | 13.948 | 12.816 | 13.166 | 3.72E-04 | 7.54E-02 | 0.83  | 0.35  |
| <i>lpg2283</i> | small ORF (132aa)                                                       |             | ORFs of unknown function (unique)         | 13.171 | 13.949 | 13.219 | 13.700 | 3.62E-04 | 1.80E-02 | 0.78  | 0.52  |
| <i>lpg2284</i> | ABC transporter, ATP binding protein (lipoprotein releasing system)     |             | Transport and binding                     | 11.638 | 12.631 | 9.601  | 12.341 | 4.90E-03 | 7.12E-05 | 0.99  | 2.74  |
| <i>lpg2284</i> | ABC transporter, ATP binding protein (lipoprotein releasing system)     |             | Transport and binding                     | 11.275 | 12.647 | 9.107  | 12.406 | 2.34E-02 | 3.09E-04 | 1.37  | 3.30  |
| <i>lpg2285</i> | lipoprotein ABC transporter (permease) (lipoprotein releasing system)   |             | Transport and binding                     | 9.925  | 11.067 | 8.921  | 11.697 | 1.54E-02 | 9.73E-04 | 1.14  | 2.78  |
| <i>lpg2285</i> | lipoprotein ABC transporter (permease) (lipoprotein releasing system)   |             | Transport and binding                     | 10.196 | 11.084 | 8.022  | 11.841 | 1.97E-02 | 1.36E-02 | 0.89  | 3.82  |
| <i>lpg2286</i> | pirin (chromosome condensation) protein                                 |             | Signal transduction / other regulatory f  | 9.950  | 9.828  | 10.468 | 9.894  | 8.33E-01 | 2.80E-02 | -0.12 | -0.57 |
| <i>lpg2286</i> | pirin (chromosome condensation) protein                                 |             | Signal transduction / other regulatory f  | 10.104 | 10.651 | 10.337 | 10.532 | 1.13E-01 | 7.62E-01 | 0.55  | 0.19  |
| <i>lpg2287</i> | [acyl carrier protein] phosphodiesterase                                | <i>acpD</i> | Metabolism of Cofactors and Vitamins      | 10.725 | 10.903 | 11.260 | 10.453 | 6.30E-01 | 6.82E-02 | 0.18  | -0.81 |
| <i>lpg2287</i> | [acyl carrier protein] phosphodiesterase                                | <i>acpD</i> | Metabolism of Cofactors and Vitamins      | 10.747 | 11.096 | 11.208 | 10.692 | 4.56E-01 | 2.30E-01 | 0.35  | -0.52 |
| <i>lpg2288</i> | transcriptional regulator, LysR family                                  |             | Transcription factors / DNA binding prc   | 8.989  | 10.265 | 9.944  | 9.582  | 7.39E-03 | 3.65E-01 | 1.28  | -0.36 |
| <i>lpg2288</i> | transcriptional regulator, LysR family                                  |             | Transcription factors / DNA binding prc   | 9.023  | 9.635  | 9.691  | 9.892  | 2.54E-01 | 6.45E-01 | 0.61  | 0.20  |
| <i>lpg2289</i> | ORF                                                                     |             | ORFs of unknown function (unique)         | 12.422 | 10.382 | 9.829  | 11.028 | 2.02E-02 | 3.07E-01 | -2.04 | 1.20  |
| <i>lpg2289</i> | ORF                                                                     |             | ORFs of unknown function (unique)         | 12.213 | 10.159 | 9.198  | 10.633 | 5.05E-02 | 2.51E-01 | -2.05 | 1.43  |

|                |                                                                      |                   |                                          |        |        |        |        |          |          |       |       |
|----------------|----------------------------------------------------------------------|-------------------|------------------------------------------|--------|--------|--------|--------|----------|----------|-------|-------|
| <i>lpg2290</i> | tRNA-Leu                                                             |                   | tRNA                                     | 12.152 | 10.250 | 11.319 | 10.822 | 7.56E-04 | 3.71E-01 | -1.90 | -0.50 |
| <i>lpg2290</i> | tRNA-Leu                                                             |                   | tRNA                                     | 12.187 | 10.195 | 11.092 | 10.883 | 4.60E-04 | 6.85E-01 | -1.99 | -0.21 |
| <i>lpg2291</i> | tRNA-Cys                                                             |                   | tRNA                                     | 12.307 | 11.025 | 11.457 | 11.552 | 1.10E-01 | 8.43E-01 | -1.28 | 0.09  |
| <i>lpg2291</i> | tRNA-Cys                                                             |                   | tRNA                                     | 12.640 | 11.811 | 11.613 | 12.448 | 2.00E-01 | 1.06E-01 | -0.83 | 0.83  |
| <i>lpg2292</i> | tRNA-Gly                                                             |                   | tRNA                                     | 12.824 | 10.093 | 10.789 | 10.534 | 1.12E-03 | 7.30E-01 | -2.73 | -0.25 |
| <i>lpg2292</i> | tRNA-Gly                                                             |                   | tRNA                                     | 12.664 | 9.926  | 10.775 | 10.858 | 9.22E-03 | 9.05E-01 | -2.74 | 0.08  |
| <i>lpg2293</i> | CDP-diacylglycerol--glycerol-3-phosphate 3-phosphatidyl <i>pgsA</i>  |                   | Metabolism of Complex Lipids             | 12.253 | 12.024 | 12.967 | 11.135 | 5.83E-01 | 1.83E-01 | -0.23 | -1.83 |
| <i>lpg2293</i> | CDP-diacylglycerol--glycerol-3-phosphate 3-phosphatidyl <i>pgsA</i>  |                   | Metabolism of Complex Lipids             | 12.043 | 11.701 | 12.808 | 11.879 | 6.15E-01 | 1.36E-01 | -0.34 | -0.93 |
| <i>lpg2294</i> | hydrolase (haloacid dehalogenase family) (phosphoglycolate phospho:  |                   | Carbohydrate Metabolism                  | 11.808 | 11.316 | 11.553 | 11.122 | 3.08E-01 | 1.16E-01 | -0.49 | -0.43 |
| <i>lpg2294</i> | hydrolase (haloacid dehalogenase family) (phosphoglycolate phospho:  |                   | Carbohydrate Metabolism                  | 11.376 | 11.429 | 11.544 | 11.191 | 8.35E-01 | 1.70E-01 | 0.05  | -0.35 |
| <i>lpg2295</i> | ribosomal large subunit (23S rRNA) pseudouridine synth: <i>rluC</i>  |                   | DNA/RNA degradation / restriction, Tr    | 13.170 | 13.462 | 13.725 | 13.814 | 2.14E-01 | 6.83E-01 | 0.29  | 0.09  |
| <i>lpg2295</i> | ribosomal large subunit (23S rRNA) pseudouridine synth: <i>rluC</i>  |                   | DNA/RNA degradation / restriction, Tr    | 13.183 | 13.466 | 13.709 | 13.829 | 2.25E-01 | 6.15E-01 | 0.28  | 0.12  |
| <i>lpg2296</i> | ORF                                                                  |                   | ORFs of unknown function (unique)        | 12.715 | 10.534 | 9.125  | 12.000 | 4.91E-05 | 4.25E-03 | -2.18 | 2.87  |
| <i>lpg2296</i> | ORF                                                                  |                   | ORFs of unknown function (unique)        | 12.727 | 10.198 | 8.930  | 12.006 | 3.61E-04 | 4.71E-03 | -2.53 | 3.08  |
| <i>lpg2297</i> | ribonuclease E                                                       | <i>rne</i>        | Metabolism of Complex Carbohydrate:      | 11.513 | 13.598 | 11.589 | 11.587 | 1.33E-06 | 9.95E-01 | 2.09  | 0.00  |
| <i>lpg2297</i> | ribonuclease E                                                       | <i>rne</i>        | Metabolism of Complex Carbohydrate:      | 11.223 | 13.543 | 11.427 | 11.481 | 1.78E-05 | 8.91E-01 | 2.32  | 0.05  |
| <i>lpg2298</i> | inclusion membrane protein A                                         | <i>legC7/YifA</i> | Named proteins of general function       | 11.232 | 10.144 | 9.612  | 12.250 | 1.46E-01 | 7.00E-03 | -1.09 | 2.64  |
| <i>lpg2298</i> | inclusion membrane protein A                                         | <i>legC7/YifA</i> | Named proteins of general function       | 11.343 | 10.839 | 9.475  | 12.473 | 4.06E-01 | 6.80E-04 | -0.50 | 3.00  |
| <i>lpg2299</i> | ATP-dependent RNA helicase (RNA polymerase associat                  | <i>hepA</i>       | Signal transduction / other regulatory f | 9.419  | 9.073  | 8.964  | 9.711  | 4.99E-01 | 1.60E-01 | -0.35 | 0.75  |
| <i>lpg2299</i> | ATP-dependent RNA helicase (RNA polymerase associat                  | <i>hepA</i>       | Signal transduction / other regulatory f | 9.310  | 9.247  | 8.043  | 9.504  | 8.99E-01 | 2.29E-01 | -0.06 | 1.46  |
| <i>lpg2300</i> | ankyrin repeat domain protein                                        | <i>legA3</i>      | Named proteins of general function       | 10.874 | 11.447 | 12.874 | 11.668 | 4.08E-01 | 6.25E-03 | 0.57  | -1.21 |
| <i>lpg2300</i> | ankyrin repeat domain protein                                        | <i>legA3</i>      | Named proteins of general function       | 11.155 | 11.645 | 12.993 | 12.150 | 4.34E-01 | 8.92E-02 | 0.49  | -0.84 |
| <i>lpg2301</i> | hypothetical (Smr domain protein)                                    |                   | Named proteins of general function       | 11.778 | 11.433 | 13.626 | 11.754 | 4.90E-01 | 4.78E-03 | -0.35 | -1.87 |
| <i>lpg2301</i> | hypothetical (Smr domain protein)                                    |                   | Named proteins of general function       | 11.827 | 11.624 | 13.649 | 11.848 | 6.73E-01 | 4.93E-03 | -0.20 | -1.80 |
| <i>lpg2302</i> | aspartate semialdehyde dehydrogenase                                 | <i>asd</i>        | Amino Acid Metabolism                    | 10.255 | 12.632 | 11.340 | 12.426 | 4.02E-06 | 1.11E-02 | 2.38  | 1.09  |
| <i>lpg2302</i> | aspartate semialdehyde dehydrogenase                                 | <i>asd</i>        | Amino Acid Metabolism                    | 10.219 | 12.112 | 11.179 | 12.353 | 3.39E-03 | 5.14E-02 | 1.89  | 1.17  |
| <i>lpg2303</i> | chorismate synthase AroC                                             |                   | Amino Acid Metabolism                    | 10.459 | 9.755  | 11.806 | 9.691  | 2.29E-01 | 9.70E-03 | -0.70 | -2.12 |
| <i>lpg2303</i> | chorismate synthase AroC                                             |                   | Amino Acid Metabolism                    | 10.166 | 10.131 | 11.188 | 10.186 | 9.18E-01 | 3.27E-02 | -0.03 | -1.00 |
| <i>lpg2304</i> | adenine specific methylase                                           |                   | Signal transduction / other regulatory f | 10.816 | 12.359 | 9.445  | 12.669 | 4.81E-03 | 3.59E-05 | 1.54  | 3.22  |
| <i>lpg2304</i> | adenine specific methylase                                           |                   | Signal transduction / other regulatory f | 10.693 | 12.429 | 9.126  | 12.669 | 6.54E-03 | 3.95E-05 | 1.74  | 3.54  |
| <i>lpg2305</i> | Smr domain protein, ATP binding/mismatch repair?                     |                   | Replication and Repair                   | 10.940 | 10.412 | 12.095 | 10.233 | 4.86E-01 | 2.98E-02 | -0.53 | -1.86 |
| <i>lpg2305</i> | Smr domain protein, ATP binding/mismatch repair?                     |                   | Replication and Repair                   | 10.956 | 10.501 | 12.193 | 10.836 | 4.54E-01 | 2.20E-03 | -0.45 | -1.36 |
| <i>lpg2306</i> | rhodanese domain protein                                             |                   | Named proteins of general function       | 11.360 | 11.136 | 10.273 | 11.842 | 6.39E-01 | 7.64E-02 | -0.22 | 1.57  |
| <i>lpg2306</i> | rhodanese domain protein                                             |                   | Named proteins of general function       | 11.394 | 11.423 | 10.319 | 12.068 | 9.20E-01 | 1.21E-02 | 0.03  | 1.75  |
| <i>lpg2307</i> | glutaredoxin 3                                                       | <i>grxC</i>       | Detoxification / adaptation              | 10.342 | 10.903 | 9.743  | 11.022 | 4.23E-01 | 8.66E-02 | 0.56  | 1.28  |
| <i>lpg2307</i> | glutaredoxin 3                                                       | <i>grxC</i>       | Detoxification / adaptation              | 10.605 | 10.674 | 10.039 | 11.497 | 8.36E-01 | 9.78E-03 | 0.07  | 1.46  |
| <i>lpg2308</i> | protein export protein SecB (preprotein translocase)                 | <i>secB</i>       | Protein fate / hydrolases / secretion    | 11.949 | 12.227 | 10.942 | 12.735 | 7.13E-01 | 2.13E-02 | 0.28  | 1.79  |
| <i>lpg2308</i> | protein export protein SecB (preprotein translocase)                 | <i>secB</i>       | Protein fate / hydrolases / secretion    | 11.987 | 12.261 | 10.792 | 12.708 | 7.15E-01 | 2.88E-02 | 0.27  | 1.92  |
| <i>lpg2309</i> | glycerol-3-phosphate dehydrogenase [NAD(P)+] (NAD(P                  | <i>gpsA</i>       | Metabolism of Complex Lipids             | 10.993 | 9.525  | 10.301 | 11.268 | 3.61E-02 | 1.53E-02 | -1.47 | 0.97  |
| <i>lpg2309</i> | glycerol-3-phosphate dehydrogenase [NAD(P)+] (NAD(P                  | <i>gpsA</i>       | Metabolism of Complex Lipids             | 10.837 | 9.250  | 10.160 | 11.288 | 4.94E-03 | 1.49E-02 | -1.59 | 1.13  |
| <i>lpg2310</i> | glutamate racemase                                                   | <i>murl</i>       | Amino Acid Metabolism, Metabolism o      | 10.072 | 9.642  | 12.600 | 9.273  | 5.45E-01 | 3.48E-04 | -0.43 | -3.33 |
| <i>lpg2310</i> | glutamate racemase                                                   | <i>murl</i>       | Amino Acid Metabolism, Metabolism o      | 10.030 | 11.160 | 12.569 | 10.354 | 1.45E-01 | 5.26E-03 | 1.13  | -2.21 |
| <i>lpg2311</i> | interaptin                                                           |                   | Named proteins of general function       | 8.267  | 9.690  | 9.577  | 8.959  | 1.62E-02 | 6.41E-01 | 1.42  | -0.62 |
| <i>lpg2311</i> | interaptin                                                           |                   | Named proteins of general function       | 8.380  | 9.273  | 9.621  | 9.211  | 2.01E-01 | 7.00E-01 | 0.89  | -0.41 |
| <i>lpg2312</i> | small ORF (100aa)                                                    |                   | ORFs of unknown function (unique)        | 8.541  | 9.538  | 12.072 | 8.575  | 2.79E-01 | 3.01E-03 | 1.00  | -3.50 |
| <i>lpg2312</i> | small ORF (100aa)                                                    |                   | ORFs of unknown function (unique)        | 8.754  | 9.058  | 11.646 | 8.565  | 7.76E-01 | 2.36E-02 | 0.30  | -3.08 |
| <i>lpg2313</i> | hypothetical                                                         |                   | Unknown / hypothetical proteins          | 13.182 | 13.475 | 13.725 | 13.258 | 4.49E-01 | 4.85E-01 | 0.29  | -0.47 |
| <i>lpg2313</i> | hypothetical                                                         |                   | Unknown / hypothetical proteins          | 13.022 | 13.440 | 13.717 | 13.332 | 1.88E-01 | 4.95E-01 | 0.42  | -0.39 |
| <i>lpg2314</i> | dihydrodipicolinate synthase                                         |                   | Amino Acid Metabolism                    | 12.449 | 12.886 | 11.870 | 12.617 | 4.17E-03 | 2.43E-03 | 0.44  | 0.75  |
| <i>lpg2314</i> | dihydrodipicolinate synthase                                         |                   | Amino Acid Metabolism                    | 12.170 | 12.771 | 11.706 | 12.670 | 2.74E-02 | 1.20E-03 | 0.60  | 0.96  |
| <i>lpg2315</i> | ORF (COG2885 outer membrane protein and related peptidoglycan a      |                   | Named proteins of general function       | 12.848 | 13.512 | 14.444 | 13.778 | 3.64E-01 | 4.39E-01 | 0.66  | -0.67 |
| <i>lpg2315</i> | ORF (COG2885 outer membrane protein and related peptidoglycan a      |                   | Named proteins of general function       | 12.637 | 13.567 | 14.256 | 13.882 | 1.16E-01 | 6.78E-01 | 0.93  | -0.37 |
| <i>lpg2316</i> | 3-hydroxybutyrate dehydrogenase (D-beta hydroxybutyr: <i>bdhA</i>    |                   | Lipid Metabolism, Carbohydrate Metat     | 11.833 | 11.845 | 14.774 | 11.334 | 9.86E-01 | 3.53E-04 | 0.01  | -3.44 |
| <i>lpg2316</i> | 3-hydroxybutyrate dehydrogenase (D-beta hydroxybutyr: <i>bdhA</i>    |                   | Lipid Metabolism, Carbohydrate Metat     | 11.766 | 11.759 | 14.747 | 11.377 | 9.93E-01 | 3.66E-04 | -0.01 | -3.37 |
| <i>lpg2317</i> | transmembrane protein                                                |                   | Unknown / hypothetical proteins          | 10.083 | 9.644  | 12.555 | 8.664  | 4.65E-01 | 2.26E-03 | -0.44 | -3.89 |
| <i>lpg2317</i> | transmembrane protein                                                |                   | Unknown / hypothetical proteins          | 10.309 | 9.645  | 12.690 | 9.826  | 2.43E-01 | 1.01E-02 | -0.66 | -2.86 |
| <i>lpg2318</i> | chemotaxis (motility protein A) transmembrane (proton c: <i>motA</i> |                   | Chemotaxis / motility / cell division    | 11.379 | 9.516  | 13.069 | 9.871  | 4.35E-02 | 5.28E-04 | -1.86 | -3.20 |
| <i>lpg2318</i> | chemotaxis (motility protein A) transmembrane (proton c: <i>motA</i> |                   | Chemotaxis / motility / cell division    | 11.276 | 10.252 | 12.982 | 10.363 | 1.82E-01 | 2.78E-03 | -1.02 | -2.62 |
| <i>lpg2319</i> | chemotaxis (motility protein B) transmembrane (flagellar <i>motB</i> |                   | Chemotaxis / motility / cell division    | 9.568  | 8.983  | 10.783 | 9.257  | 3.11E-02 | 1.07E-03 | -0.59 | -1.53 |
| <i>lpg2319</i> | chemotaxis (motility protein B) transmembrane (flagellar <i>motB</i> |                   | Chemotaxis / motility / cell division    | 9.763  | 8.527  | 10.807 | 9.655  | 3.35E-02 | 1.20E-02 | -1.24 | -1.15 |
| <i>lpg2320</i> | small ORF (157aa)                                                    |                   | ORFs of unknown function (unique)        | 11.699 | 13.180 | 10.294 | 12.196 | 3.89E-04 | 1.70E-03 | 1.48  | 1.90  |
| <i>lpg2320</i> | small ORF (157aa)                                                    |                   | ORFs of unknown function (unique)        | 11.603 | 13.174 | 9.970  | 12.134 | 6.65E-04 | 9.57E-03 | 1.57  | 2.16  |
| <i>lpg2321</i> | serine transporter                                                   | <i>sdaC</i>       | Transport and binding                    | 12.543 | 14.444 | 11.342 | 13.560 | 5.48E-04 | 1.37E-04 | 1.90  | 2.22  |
| <i>lpg2321</i> | serine transporter                                                   | <i>sdaC</i>       | Transport and binding                    | 12.515 | 14.478 | 11.363 | 13.623 | 7.39E-04 | 7.75E-05 | 1.96  | 2.26  |



|                |                                                                     |              |                                           |        |        |        |        |          |          |       |       |
|----------------|---------------------------------------------------------------------|--------------|-------------------------------------------|--------|--------|--------|--------|----------|----------|-------|-------|
| <i>lpg2322</i> | cardiac ankyrin repeat protein                                      | <i>legA5</i> | Named proteins of general function        | 8.876  | 10.061 | 9.998  | 9.097  | 8.45E-02 | 1.30E-01 | 1.18  | -0.90 |
| <i>lpg2322</i> | cardiac ankyrin repeat protein                                      | <i>legA5</i> | Named proteins of general function        | 8.877  | 10.539 | 10.144 | 9.495  | 2.02E-02 | 2.91E-01 | 1.66  | -0.65 |
| <i>lpg2323</i> | type II secretion system protein (twitching motility protein)       | <i>uptC</i>  | Protein fate / hydrolases / secretion, C  | 9.153  | 9.085  | 11.936 | 7.559  | 9.52E-01 | 3.35E-04 | -0.07 | -4.38 |
| <i>lpg2323</i> | type II secretion system protein (twitching motility protein)       | <i>uptC</i>  | Protein fate / hydrolases / secretion, C  | 9.097  | 9.342  | 11.965 | 8.701  | 7.41E-01 | 1.72E-03 | 0.25  | -3.26 |
| <i>lpg2324</i> | L-gulonon-gamma-lactone oxidase                                     | <i>Gulo</i>  | Carbohydrate Metabolism                   | 9.756  | 10.251 | 10.811 | 8.297  | 3.48E-01 | 1.33E-02 | 0.50  | -2.51 |
| <i>lpg2324</i> | L-gulonon-gamma-lactone oxidase                                     | <i>Gulo</i>  | Carbohydrate Metabolism                   | 9.688  | 10.747 | 10.968 | 9.211  | 2.91E-01 | 2.18E-01 | 1.06  | -1.76 |
| <i>lpg2325</i> | hypothetical (SnoK protein?)                                        |              | Unknown / hypothetical proteins           | 9.462  | 10.352 | 9.243  | 10.015 | 1.20E-02 | 3.84E-02 | 0.89  | 0.77  |
| <i>lpg2325</i> | hypothetical (SnoK protein?)                                        |              | Unknown / hypothetical proteins           | 9.419  | 10.395 | 9.395  | 10.208 | 5.30E-03 | 1.61E-03 | 0.98  | 0.81  |
| <i>lpg2326</i> | DNA repair protein RadA                                             | <i>radA</i>  | Replication and Repair                    | 10.032 | 11.327 | 10.190 | 11.225 | 8.34E-04 | 1.12E-03 | 1.30  | 1.03  |
| <i>lpg2326</i> | DNA repair protein RadA                                             | <i>radA</i>  | Replication and Repair                    | 10.150 | 11.709 | 10.262 | 11.968 | 4.71E-02 | 4.06E-02 | 1.56  | 1.71  |
| <i>lpg2327</i> | CG18304 gene product                                                |              | Unknown / hypothetical proteins           | 11.226 | 12.756 | 12.766 | 8.410  | 1.99E-02 | 4.95E-05 | 1.53  | -4.36 |
| <i>lpg2327</i> | CG18304 gene product                                                |              | Unknown / hypothetical proteins           | 11.262 | 12.819 | 12.801 | 8.692  | 1.41E-02 | 5.01E-05 | 1.56  | -4.11 |
| <i>lpg2328</i> | small ORF (127aa)                                                   |              | ORFs of unknown function (unique)         | 12.559 | 12.678 | 11.844 | 12.456 | 5.74E-01 | 8.50E-02 | 0.12  | 0.61  |
| <i>lpg2328</i> | small ORF (127aa)                                                   |              | ORFs of unknown function (unique)         | 12.424 | 12.714 | 11.786 | 12.533 | 4.14E-01 | 4.15E-02 | 0.29  | 0.75  |
| <i>lpg2329</i> | exodeoxyribonuclease VII small subunit (exonuclease VI)             | <i>xseB</i>  | DNA/RNA degradation / restriction         | 11.812 | 12.941 | 13.086 | 13.480 | 1.16E-02 | 5.04E-01 | 1.13  | 0.39  |
| <i>lpg2329</i> | exodeoxyribonuclease VII small subunit (exonuclease VI)             | <i>xseB</i>  | DNA/RNA degradation / restriction         | 10.025 | 10.126 | 10.678 | 11.715 | 8.97E-01 | 4.16E-02 | 0.10  | 1.04  |
| <i>lpg2330</i> | geranyltransferase (farnesyl-diphosphate synthase)                  | <i>ispA</i>  | Lipid Metabolism, Biosynthesis of Sec     | 10.064 | 8.372  | 9.350  | 11.475 | 2.34E-03 | 8.88E-04 | -1.69 | 2.13  |
| <i>lpg2330</i> | geranyltransferase (farnesyl-diphosphate synthase)                  | <i>ispA</i>  | Lipid Metabolism, Biosynthesis of Sec     | 9.670  | 9.271  | 8.581  | 11.851 | 7.89E-01 | 4.69E-03 | -0.40 | 3.27  |
| <i>lpg2331</i> | biotin synthase BioC (SAM (and some other nucleotide) t)            | <i>bioC</i>  | Metabolism of Cofactors and Vitamins      | 9.460  | 10.250 | 8.793  | 10.228 | 1.58E-01 | 1.05E-02 | 0.79  | 1.44  |
| <i>lpg2331</i> | biotin synthase BioC (SAM (and some other nucleotide) t)            | <i>bioC</i>  | Metabolism of Cofactors and Vitamins      | 9.776  | 10.377 | 8.432  | 10.305 | 9.68E-02 | 1.73E-02 | 0.60  | 1.87  |
| <i>lpg2332</i> | competence protein ComF (phosphoribosyltransferase)                 |              | Transport and binding                     | 8.949  | 8.957  | 9.129  | 8.165  | 9.89E-01 | 2.19E-01 | 0.01  | -0.96 |
| <i>lpg2332</i> | competence protein ComF (phosphoribosyltransferase)                 |              | Transport and binding                     | 8.397  | 9.404  | 9.165  | 8.982  | 2.73E-02 | 7.04E-01 | 1.01  | -0.18 |
| <i>lpg2333</i> | membrane associated zinc metalloprotease                            |              | Protein fate / hydrolases / secretion     | 10.312 | 10.032 | 11.306 | 9.649  | 6.21E-01 | 2.86E-02 | -0.28 | -1.66 |
| <i>lpg2333</i> | membrane associated zinc metalloprotease                            |              | Protein fate / hydrolases / secretion     | 10.443 | 9.861  | 11.310 | 10.035 | 2.62E-01 | 2.92E-02 | -0.58 | -1.28 |
| <i>lpg2334</i> | ORF                                                                 |              | ORFs of unknown function (unique)         | 9.678  | 9.382  | 12.745 | 8.934  | 6.77E-01 | 6.02E-04 | -0.30 | -3.81 |
| <i>lpg2334</i> | ORF                                                                 |              | ORFs of unknown function (unique)         | 9.690  | 8.891  | 12.708 | 9.120  | 3.34E-01 | 5.30E-04 | -0.80 | -3.59 |
| <i>lpg2335</i> | glutamyl tRNA reductase                                             | <i>hemA</i>  | Metabolism of Cofactors and Vitamins      | 11.272 | 11.423 | 10.685 | 10.899 | 7.07E-01 | 8.18E-01 | 0.15  | 0.21  |
| <i>lpg2335</i> | glutamyl tRNA reductase                                             | <i>hemA</i>  | Metabolism of Cofactors and Vitamins      | 11.287 | 11.463 | 10.719 | 11.398 | 6.72E-01 | 1.38E-01 | 0.18  | 0.68  |
| <i>lpg2336</i> | peptide chain release factor 1 (RF-1)                               | <i>prfA</i>  | Translation                               | 11.310 | 10.356 | 10.735 | 11.479 | 1.04E-01 | 5.23E-02 | -0.95 | 0.74  |
| <i>lpg2336</i> | peptide chain release factor 1 (RF-1)                               | <i>prfA</i>  | Translation                               | 11.222 | 10.440 | 10.446 | 11.380 | 7.72E-02 | 3.88E-02 | -0.78 | 0.93  |
| <i>lpg2337</i> | protein methyltransferase HemK (modification methylase)             |              | Protein fate / hydrolases / secretion     | 8.877  | 10.264 | 9.924  | 9.943  | 6.35E-02 | 9.77E-01 | 1.39  | 0.02  |
| <i>lpg2337</i> | protein methyltransferase HemK (modification methylase)             |              | Protein fate / hydrolases / secretion     | 7.722  | 10.210 | 9.956  | 10.354 | 1.18E-02 | 2.85E-01 | 2.49  | 0.40  |
| <i>lpg2338</i> | DnaK suppressor protein                                             | <i>dkxA</i>  | Transcription factors / DNA binding prc   | 14.039 | 12.656 | 13.386 | 13.692 | 2.26E-05 | 1.15E-01 | -1.38 | 0.31  |
| <i>lpg2338</i> | DnaK suppressor protein                                             | <i>dkxA</i>  | Transcription factors / DNA binding prc   | 14.052 | 12.685 | 13.352 | 13.713 | 3.44E-05 | 7.12E-02 | -1.37 | 0.36  |
| <i>lpg2339</i> | ORF                                                                 |              | ORFs of unknown function (unique)         | 11.366 | 8.827  | 10.205 | 10.374 | 1.86E-04 | 7.52E-01 | -2.54 | 0.17  |
| <i>lpg2339</i> | ORF                                                                 |              | ORFs of unknown function (unique)         | 11.417 | 9.160  | 10.256 | 10.816 | 4.75E-04 | 2.05E-01 | -2.26 | 0.56  |
| <i>lpg2340</i> | 3-deoxy-D-manno-oct-2-ulosonic acid transferase (Kdo tr)            | <i>kdtA</i>  | Metabolism of Complex Carbohydrate:       | 9.118  | 8.360  | 8.880  | 7.787  | 2.10E-01 | 1.43E-01 | -0.76 | -1.09 |
| <i>lpg2340</i> | 3-deoxy-D-manno-oct-2-ulosonic acid transferase (Kdo tr)            | <i>kdtA</i>  | Metabolism of Complex Carbohydrate:       | 9.415  | 8.462  | 8.722  | 8.629  | 9.77E-03 | 8.90E-01 | -0.95 | -0.09 |
| <i>lpg2341</i> | DNA binding protein DnaJ, heat shock protein                        |              | Detoxification / adaptation, Transcriptir | 8.624  | 8.880  | 8.689  | 7.138  | 6.64E-01 | 1.75E-01 | 0.26  | -1.55 |
| <i>lpg2341</i> | DNA binding protein DnaJ, heat shock protein                        |              | Detoxification / adaptation, Transcriptir | 8.110  | 8.069  | 9.157  | 8.597  | 9.04E-01 | 4.26E-01 | -0.04 | -0.56 |
| <i>lpg2342</i> | ORF                                                                 |              | ORFs of unknown function (unique)         | 10.172 | 9.188  | 9.471  | 9.489  | 2.10E-01 | 9.82E-01 | -0.98 | 0.02  |
| <i>lpg2342</i> | ORF                                                                 |              | ORFs of unknown function (unique)         | 10.077 | 10.108 | 9.727  | 10.314 | 8.92E-01 | 3.94E-02 | 0.03  | 0.59  |
| <i>lpg2343</i> | lysophospholipase A (glycerophospholipid-cholesterol ac)            | <i>sseJ</i>  | Toxin production / other pathogen func    | 12.716 | 13.209 | 12.780 | 13.909 | 2.12E-03 | 4.52E-03 | 0.49  | 1.13  |
| <i>lpg2343</i> | lysophospholipase A (glycerophospholipid-cholesterol ac)            | <i>sseJ</i>  | Toxin production / other pathogen func    | 12.726 | 13.258 | 12.788 | 13.940 | 2.78E-03 | 1.86E-03 | 0.53  | 1.15  |
| <i>lpg2344</i> | ORF                                                                 |              | ORFs of unknown function (unique)         | 9.877  | 13.876 | 7.886  | 14.269 | 1.36E-04 | 1.28E-06 | 4.00  | 6.38  |
| <i>lpg2344</i> | ORF                                                                 |              | ORFs of unknown function (unique)         | 9.834  | 13.835 | 7.389  | 14.167 | 2.04E-04 | 1.81E-05 | 4.00  | 6.78  |
| <i>lpg2345</i> | ATP-dependent RNA helicase (cold shock DEAD box prc)                | <i>deaD</i>  | Detoxification / adaptation               | 10.516 | 11.466 | 10.214 | 11.844 | 1.64E-02 | 1.10E-03 | 0.95  | 1.63  |
| <i>lpg2345</i> | ATP-dependent RNA helicase (cold shock DEAD box prc)                | <i>deaD</i>  | Detoxification / adaptation               | 10.505 | 11.573 | 9.997  | 11.908 | 3.99E-03 | 1.37E-04 | 1.07  | 1.91  |
| <i>lpg2346</i> | transcriptional regulator (diacylglycerol kinase catalytic domain?) | <i>sphi</i>  | Transcription factors / DNA binding prc   | 11.047 | 10.227 | 9.642  | 9.974  | 4.43E-02 | 4.08E-01 | -0.82 | 0.33  |
| <i>lpg2346</i> | transcriptional regulator (diacylglycerol kinase catalytic domain?) | <i>sphi</i>  | Transcription factors / DNA binding prc   | 11.054 | 10.519 | 10.121 | 10.728 | 4.64E-01 | 5.12E-01 | -0.54 | 0.63  |
| <i>lpg2347</i> | 2,4-dienoyl-CoA reductase FadH1 (NADPH dehydrogen)                  | <i>fadH</i>  | Metabolism of Cofactors and Vitamins      | 10.571 | 11.487 | 11.152 | 11.351 | 2.70E-05 | 4.32E-01 | 0.92  | 0.20  |
| <i>lpg2347</i> | 2,4-dienoyl-CoA reductase FadH1 (NADPH dehydrogen)                  | <i>fadH</i>  | Metabolism of Cofactors and Vitamins      | 10.518 | 11.512 | 11.095 | 11.409 | 5.96E-05 | 6.65E-02 | 0.99  | 0.31  |
| <i>lpg2348</i> | superoxide dismutase (copper-zinc)                                  | <i>sodC</i>  | Detoxification / adaptation               | 11.713 | 11.571 | 13.707 | 10.848 | 7.54E-01 | 3.90E-04 | -0.14 | -2.86 |
| <i>lpg2348</i> | superoxide dismutase (copper-zinc)                                  | <i>sodC</i>  | Detoxification / adaptation               | 11.751 | 11.443 | 13.694 | 10.891 | 5.98E-01 | 3.81E-04 | -0.31 | -2.80 |
| <i>lpg2349</i> | alkylhydroperoxidase AhpD family core domain protein                |              | Detoxification / adaptation               | 10.545 | 10.962 | 11.825 | 10.909 | 1.32E-01 | 1.65E-01 | 0.42  | -0.92 |
| <i>lpg2349</i> | alkylhydroperoxidase AhpD family core domain protein                |              | Detoxification / adaptation               | 10.700 | 10.938 | 11.805 | 11.048 | 4.76E-01 | 2.51E-01 | 0.24  | -0.76 |
| <i>lpg2350</i> | alkylhydroperoxide reductase (antioxidant protein, AhpC/TSA family) |              | Detoxification / adaptation               | 11.773 | 11.937 | 11.911 | 10.631 | 5.36E-01 | 2.96E-05 | 0.16  | -1.28 |
| <i>lpg2350</i> | alkylhydroperoxide reductase (antioxidant protein, AhpC/TSA family) |              | Detoxification / adaptation               | 11.622 | 11.958 | 11.841 | 10.709 | 3.48E-01 | 2.25E-04 | 0.34  | -1.13 |
| <i>lpg2351</i> | ORF                                                                 |              | ORFs of unknown function (unique)         | 10.291 | 9.357  | 13.144 | 8.911  | 1.75E-01 | 1.59E-03 | -0.93 | -4.23 |
| <i>lpg2351</i> | ORF                                                                 |              | ORFs of unknown function (unique)         | 10.220 | 9.376  | 13.221 | 9.075  | 1.78E-01 | 1.66E-03 | -0.84 | -4.15 |
| <i>lpg2352</i> | malate dehydrogenase                                                | <i>mdh</i>   | Carbohydrate Metabolism, Energy Me        | 13.684 | 13.619 | 14.306 | 13.721 | 7.99E-01 | 8.76E-02 | -0.06 | -0.59 |
| <i>lpg2352</i> | malate dehydrogenase                                                | <i>mdh</i>   | Carbohydrate Metabolism, Energy Me        | 13.596 | 13.538 | 14.204 | 13.660 | 8.65E-01 | 1.83E-01 | -0.06 | -0.54 |
| <i>lpg2353</i> | NUDIX hydrolase (MutT/nudix family protein) (nucleoside)            | <i>yrfE</i>  | Metabolism of Complex Carbohydrate:       | 11.655 | 11.495 | 11.694 | 11.480 | 7.35E-01 | 3.17E-01 | -0.16 | -0.21 |
| <i>lpg2353</i> | NUDIX hydrolase (MutT/nudix family protein) (nucleoside)            | <i>yrfE</i>  | Metabolism of Complex Carbohydrate:       | 11.277 | 12.442 | 11.923 | 12.789 | 7.03E-04 | 4.00E-03 | 1.16  | 0.87  |

|                |                                                                                                         |             |                                         |        |        |        |        |          |          |       |       |
|----------------|---------------------------------------------------------------------------------------------------------|-------------|-----------------------------------------|--------|--------|--------|--------|----------|----------|-------|-------|
| <i>lpg2354</i> | (oxygen-independent) coproporphyrinogen III oxidase                                                     |             | Metabolism of Cofactors and Vitamins    | 9.382  | 7.995  | 8.547  | 9.697  | 1.66E-01 | 5.85E-02 | -1.39 | 1.15  |
| <i>lpg2354</i> | (oxygen-independent) coproporphyrinogen III oxidase                                                     |             | Metabolism of Cofactors and Vitamins    | 9.212  | 8.866  | 8.116  | 9.623  | 3.00E-01 | 1.66E-01 | -0.35 | 1.51  |
| <i>lpg2355</i> | amidase (enantiomer selective) (glu-tRNA amidotransferase subunit / Amino Acid Metabolism, Metabolism o |             |                                         | 9.334  | 9.680  | 8.950  | 9.364  | 2.20E-01 | 4.75E-01 | 0.35  | 0.41  |
| <i>lpg2355</i> | amidase (enantiomer selective) (glu-tRNA amidotransferase subunit / Amino Acid Metabolism, Metabolism o |             |                                         | 9.329  | 9.973  | 8.429  | 9.598  | 2.70E-02 | 5.51E-02 | 0.64  | 1.17  |
| <i>lpg2356</i> | transmembrane protein                                                                                   |             | Unknown / hypothetical proteins         | 12.056 | 12.090 | 11.521 | 11.892 | 8.59E-01 | 1.44E-01 | 0.03  | 0.37  |
| <i>lpg2356</i> | transmembrane protein                                                                                   |             | Unknown / hypothetical proteins         | 12.147 | 12.070 | 11.317 | 11.817 | 6.84E-01 | 6.83E-02 | -1.08 | 0.50  |
| <i>lpg2357</i> | O-sialoglycoprotein endopeptidase                                                                       | <i>gcp</i>  | Protein fate / hydrolases / secretion   | 12.199 | 11.170 | 11.044 | 11.799 | 1.44E-03 | 2.65E-02 | -0.03 | 0.76  |
| <i>lpg2357</i> | O-sialoglycoprotein endopeptidase                                                                       | <i>gcp</i>  | Protein fate / hydrolases / secretion   | 12.251 | 11.152 | 10.920 | 11.734 | 4.46E-04 | 1.37E-02 | -1.10 | 0.81  |
| <i>lpg2358</i> | 30S ribosomal protein S21                                                                               | <i>rpsU</i> | Translation                             | 10.658 | 10.844 | 9.250  | 12.570 | 8.50E-01 | 2.23E-04 | 0.19  | 3.32  |
| <i>lpg2358</i> | 30S ribosomal protein S21                                                                               | <i>rpsU</i> | Translation                             | 11.117 | 10.347 | 9.183  | 12.862 | 6.18E-02 | 4.63E-05 | -0.77 | 3.68  |
| <i>lpg2359</i> | conserved hypothetical protein                                                                          |             | Unknown / hypothetical proteins         | 11.386 | 10.005 | 8.986  | 11.533 | 7.51E-04 | 3.92E-02 | -1.38 | 2.55  |
| <i>lpg2359</i> | conserved hypothetical protein                                                                          |             | Unknown / hypothetical proteins         | 10.989 | 10.308 | 9.399  | 12.142 | 3.19E-01 | 8.45E-04 | -0.68 | 2.74  |
| <i>lpg2360</i> | DNA primase DnaG                                                                                        |             | Replication and Repair                  | 9.109  | 8.037  | 9.160  | 9.267  | 9.81E-02 | 8.98E-01 | -1.07 | 0.11  |
| <i>lpg2360</i> | DNA primase DnaG                                                                                        |             | Replication and Repair                  | 9.637  | 7.863  | 8.563  | 9.283  | 6.28E-05 | 3.56E-01 | -1.77 | 0.72  |
| <i>lpg2361</i> | RNA polymerase sigma 70 factor (sigma factor RpoD)                                                      | <i>rpoD</i> | Transcription factors / DNA binding prc | 13.049 | 13.412 | 12.764 | 13.649 | 1.51E-01 | 1.50E-03 | 0.36  | 0.88  |
| <i>lpg2361</i> | RNA polymerase sigma 70 factor (sigma factor RpoD)                                                      | <i>rpoD</i> | Transcription factors / DNA binding prc | 13.035 | 13.417 | 12.707 | 13.657 | 1.11E-01 | 8.10E-04 | 0.38  | 0.95  |
| <i>lpg2362</i> | tRNA-Met                                                                                                |             | tRNA                                    | 7.334  | 8.579  | 7.870  | 8.050  | 1.07E-01 | 8.26E-01 | 1.24  | 0.18  |
| <i>lpg2362</i> | tRNA-Met                                                                                                |             | tRNA                                    | 7.382  | 8.280  | 7.476  | 8.345  | 3.79E-01 | 2.89E-01 | 0.90  | 0.87  |
| <i>lpg2363</i> | transposase (IS652)                                                                                     |             | Viral functions / Phage / Transposases  | 8.827  | 10.888 | 9.804  | 10.338 | 5.38E-03 | 3.23E-01 | 2.06  | 0.53  |
| <i>lpg2363</i> | transposase (IS652)                                                                                     |             | Viral functions / Phage / Transposases  | 9.130  | 10.560 | 9.297  | 10.150 | 2.47E-02 | 1.36E-01 | 1.43  | 0.85  |
| <i>lpg2364</i> | small ORF (121aa)                                                                                       |             | ORFs of unknown function (unique)       | 9.525  | 7.734  | 12.308 | 7.654  | 3.90E-03 | 6.49E-03 | -1.79 | -4.65 |
| <i>lpg2364</i> | small ORF (121aa)                                                                                       |             | ORFs of unknown function (unique)       | 9.583  | 8.067  | 12.160 | 8.281  | 3.79E-02 | 2.09E-02 | -1.52 | -3.88 |
| <i>lpg2365</i> | TraK                                                                                                    |             | Transport and binding, Protein fate / h | 10.873 | 11.078 | 9.738  | 10.998 | 4.13E-01 | 6.21E-04 | 0.20  | 1.26  |
| <i>lpg2365</i> | TraK                                                                                                    |             | Transport and binding, Protein fate / h | 10.796 | 10.938 | 9.258  | 11.317 | 7.65E-01 | 8.31E-03 | 0.14  | 2.06  |
| <i>lpg2366</i> | inner membrane protein                                                                                  |             | Named proteins of general function      | 8.615  | 9.956  | 10.214 | 9.467  | 2.59E-02 | 1.28E-01 | 1.34  | -0.75 |
| <i>lpg2366</i> | inner membrane protein                                                                                  |             | Named proteins of general function      | 8.752  | 10.087 | 10.145 | 10.271 | 9.79E-03 | 7.85E-01 | 1.33  | 0.13  |
| <i>lpg2367</i> | ORF                                                                                                     |             | ORFs of unknown function (unique)       | 9.858  | 10.255 | 9.750  | 9.647  | 3.36E-01 | 7.47E-01 | 0.40  | -0.10 |
| <i>lpg2367</i> | ORF                                                                                                     |             | ORFs of unknown function (unique)       | 9.564  | 11.177 | 9.197  | 10.352 | 3.13E-02 | 4.90E-02 | 1.61  | 1.16  |
| <i>lpg2368</i> | transcriptional regulator? phage repressor?                                                             |             | Transcription factors / DNA binding prc | 9.205  | 8.409  | 8.987  | 9.237  | 1.63E-01 | 3.49E-01 | -0.80 | 0.25  |
| <i>lpg2368</i> | transcriptional regulator? phage repressor?                                                             |             | Transcription factors / DNA binding prc | 8.800  | 8.119  | 8.278  | 9.406  | 1.49E-01 | 5.10E-02 | -0.68 | 1.13  |
| <i>lpg2369</i> | HipA (persistence to inhibition of murein or DNA biosynthesis, DNA bi                                   |             | Cell envelope synthesis, Signal transd  | 9.461  | 9.241  | 10.067 | 9.365  | 5.58E-01 | 1.48E-01 | -0.22 | -0.70 |
| <i>lpg2369</i> | HipA (persistence to inhibition of murein or DNA biosynthesis, DNA bi                                   |             | Cell envelope synthesis, Signal transd  | 9.380  | 9.553  | 10.033 | 9.389  | 5.15E-01 | 3.49E-01 | 0.17  | -0.64 |
| <i>lpg2370</i> | conserved hypothetical protein                                                                          |             | Unknown / hypothetical proteins         | 9.645  | 8.607  | 10.996 | 8.674  | 1.68E-01 | 1.67E-02 | -1.04 | -2.32 |
| <i>lpg2370</i> | conserved hypothetical protein                                                                          |             | Unknown / hypothetical proteins         | 9.668  | 7.177  | 7.741  | 7.543  | 1.10E-01 | 8.83E-01 | -2.49 | -0.20 |
| <i>lpg2371</i> | ORF                                                                                                     |             | ORFs of unknown function (unique)       | 6.506  | 6.277  | 8.006  | 6.819  | 8.24E-01 | 1.80E-01 | -0.23 | -1.19 |
| <i>lpg2371</i> | ORF                                                                                                     |             | ORFs of unknown function (unique)       | 6.340  | 7.421  | 6.681  | 8.047  | 4.60E-01 | 2.70E-01 | 1.08  | 1.37  |
| <i>lpg2372</i> | ORF                                                                                                     |             | ORFs of unknown function (unique)       | 9.229  | 10.618 | 10.298 | 9.532  | 6.89E-04 | 2.19E-01 | 1.39  | -0.77 |
| <i>lpg2372</i> | ORF                                                                                                     |             | ORFs of unknown function (unique)       | 8.903  | 10.601 | 10.255 | 10.113 | 5.54E-05 | 7.29E-01 | 1.70  | -0.14 |
| <i>lpg2373</i> | hypothetical protein                                                                                    |             | Unknown / hypothetical proteins         | 8.357  | 7.746  | 7.898  | 7.677  | 3.50E-01 | 8.31E-01 | -0.61 | -0.22 |
| <i>lpg2373</i> | hypothetical protein                                                                                    |             | Unknown / hypothetical proteins         | 8.191  | 8.479  | 7.359  | 8.720  | 6.54E-01 | 2.48E-01 | 0.29  | 1.36  |
| <i>lpg2374</i> | mannose-6-phosphate isomerase                                                                           |             | Carbohydrate Metabolism                 | 10.385 | 9.971  | 10.201 | 10.377 | 2.99E-01 | 7.47E-01 | -0.41 | 0.18  |
| <i>lpg2374</i> | mannose-6-phosphate isomerase                                                                           |             | Carbohydrate Metabolism                 | 10.355 | 9.838  | 9.951  | 10.475 | 3.87E-01 | 3.87E-01 | -0.52 | 0.52  |
| <i>lpg2375</i> | small ORF (157aa)                                                                                       |             | ORFs of unknown function (unique)       | 9.869  | 9.643  | 10.314 | 9.564  | 3.52E-01 | 1.72E-01 | -0.23 | -0.75 |
| <i>lpg2375</i> | small ORF (157aa)                                                                                       |             | ORFs of unknown function (unique)       | 9.871  | 9.390  | 10.272 | 10.134 | 1.14E-01 | 6.90E-01 | -0.48 | -0.14 |
| <i>lpg2376</i> | transcriptional regulator, LysR family                                                                  |             | Transcription factors / DNA binding prc | 9.566  | 8.804  | 10.628 | 7.606  | 1.02E-01 | 2.80E-03 | -0.76 | -3.02 |
| <i>lpg2376</i> | transcriptional regulator, LysR family                                                                  |             | Transcription factors / DNA binding prc | 9.554  | 8.882  | 10.593 | 8.473  | 3.69E-01 | 9.24E-03 | -0.67 | -2.12 |
| <i>lpg2377</i> | small ORF (75aa) transcriptional regulator?                                                             |             | Transcription factors / DNA binding prc | 9.142  | 9.209  | 10.195 | 9.278  | 9.25E-01 | 2.45E-01 | 0.07  | -0.92 |
| <i>lpg2377</i> | small ORF (75aa) transcriptional regulator?                                                             |             | Transcription factors / DNA binding prc | 9.064  | 9.035  | 9.836  | 9.399  | 9.70E-01 | 5.40E-01 | -0.03 | -0.44 |
| <i>lpg2378</i> | small ORF (57aa) hypothetical?                                                                          |             | Unknown / hypothetical proteins         | 8.967  | 8.952  | 9.112  | 8.357  | 9.75E-01 | 3.49E-01 | -0.01 | -0.76 |
| <i>lpg2378</i> | small ORF (57aa) hypothetical?                                                                          |             | Unknown / hypothetical proteins         | 9.484  | 8.938  | 8.974  | 8.819  | 2.15E-01 | 8.38E-01 | -0.55 | -0.15 |
| <i>lpg2379</i> | hypothetical protein HI0665                                                                             |             | Unknown / hypothetical proteins         | 9.869  | 10.430 | 11.003 | 11.014 | 4.28E-01 | 9.83E-01 | 0.56  | 0.01  |
| <i>lpg2379</i> | hypothetical protein HI0665                                                                             |             | Unknown / hypothetical proteins         | 9.937  | 11.412 | 11.067 | 11.442 | 1.73E-03 | 1.69E-01 | 1.47  | 0.37  |
| <i>lpg2380</i> | conserved hypothetical protein                                                                          |             | Unknown / hypothetical proteins         | 8.700  | 8.076  | 8.715  | 7.839  | 4.17E-01 | 2.56E-01 | -0.62 | -0.88 |
| <i>lpg2380</i> | conserved hypothetical protein                                                                          |             | Unknown / hypothetical proteins         | 8.761  | 8.045  | 8.761  | 8.778  | 3.70E-01 | 9.83E-01 | -0.72 | 0.02  |
| <i>lpg2381</i> | magnesium-transporting ATPase, P-type                                                                   | <i>mgt</i>  | Transport and binding                   | 8.321  | 9.076  | 9.609  | 9.810  | 3.86E-01 | 8.56E-01 | 0.76  | 0.20  |
| <i>lpg2381</i> | magnesium-transporting ATPase, P-type                                                                   | <i>mgt</i>  | Transport and binding                   | 8.564  | 9.050  | 9.723  | 10.007 | 5.74E-01 | 7.56E-01 | 0.49  | 0.28  |
| <i>lpg2382</i> | ORF                                                                                                     |             | ORFs of unknown function (unique)       | 9.765  | 8.953  | 10.701 | 8.697  | 2.46E-01 | 6.85E-02 | -0.81 | -2.00 |
| <i>lpg2382</i> | ORF                                                                                                     |             | ORFs of unknown function (unique)       | 10.250 | 8.950  | 10.989 | 9.152  | 9.94E-02 | 7.76E-02 | -1.30 | -1.84 |
| <i>lpg2383</i> | transcriptional regulator, LysR family                                                                  |             | Transcription factors / DNA binding prc | 8.305  | 7.952  | 10.188 | 7.139  | 8.49E-01 | 1.08E-01 | -0.35 | -3.05 |
| <i>lpg2383</i> | transcriptional regulator, LysR family                                                                  |             | Transcription factors / DNA binding prc | 7.744  | 6.874  | 10.019 | 7.352  | 5.55E-01 | 1.21E-01 | -0.87 | -2.67 |
| <i>lpg2384</i> | Kup system potassium uptake protein                                                                     | <i>kup</i>  | Transport and binding                   | 10.716 | 10.155 | 10.940 | 10.858 | 2.60E-01 | 8.18E-01 | -0.56 | -0.08 |
| <i>lpg2384</i> | Kup system potassium uptake protein                                                                     | <i>kup</i>  | Transport and binding                   | 10.758 | 10.080 | 10.886 | 10.856 | 2.01E-01 | 9.24E-01 | -0.68 | -0.03 |
| <i>lpg2385</i> | hypothetical protein                                                                                    |             | Unknown / hypothetical proteins         | 9.560  | 8.319  | 11.639 | 8.399  | 1.70E-01 | 5.80E-03 | -1.24 | -3.24 |
| <i>lpg2385</i> | hypothetical protein                                                                                    |             | Unknown / hypothetical proteins         | 9.548  | 9.354  | 11.626 | 8.499  | 7.40E-01 | 1.08E-03 | -0.19 | -3.13 |

|                |                                                                           |              |                                         |        |        |        |        |          |          |       |       |
|----------------|---------------------------------------------------------------------------|--------------|-----------------------------------------|--------|--------|--------|--------|----------|----------|-------|-------|
| <i>lpg2386</i> | ORF                                                                       |              | ORFs of unknown function (unique)       | 11.744 | 12.180 | 10.749 | 12.164 | 2.54E-01 | 1.60E-03 | 0.44  | 1.42  |
| <i>lpg2386</i> | ORF                                                                       |              | ORFs of unknown function (unique)       | 11.765 | 12.290 | 10.614 | 12.249 | 6.52E-02 | 1.60E-04 | 0.52  | 1.63  |
| <i>lpg2387</i> | plasminogen activator (coagulase/fibrinolysin) (outer mer <i>pla</i>      |              | Protein fate / hydrolases / secretion   | 10.301 | 11.958 | 10.547 | 9.350  | 8.46E-04 | 4.34E-02 | 1.66  | -1.20 |
| <i>lpg2387</i> | plasminogen activator (coagulase/fibrinolysin) (outer mer <i>pla</i>      |              | Protein fate / hydrolases / secretion   | 10.217 | 11.894 | 10.654 | 9.665  | 1.31E-04 | 6.35E-02 | 1.68  | -0.99 |
| <i>lpg2388</i> | amino acid permease (transporter) (L-asparagine permease)                 |              | Transport and binding                   | 10.194 | 9.530  | 10.223 | 9.181  | 1.85E-01 | 1.35E-01 | -0.66 | -1.04 |
| <i>lpg2388</i> | amino acid permease (transporter) (L-asparagine permease)                 |              | Transport and binding                   | 10.183 | 9.803  | 10.093 | 9.961  | 4.24E-01 | 8.24E-01 | -0.38 | -0.13 |
| <i>lpg2389</i> | catalase-peroxidase KatB                                                  |              | Amino Acid Metabolism, Energy Metab     | 10.257 | 11.696 | 10.170 | 10.946 | 1.55E-04 | 3.39E-02 | 1.44  | 0.78  |
| <i>lpg2389</i> | catalase-peroxidase KatB                                                  |              | Amino Acid Metabolism, Energy Metab     | 10.152 | 11.682 | 10.002 | 11.094 | 1.15E-03 | 2.40E-02 | 1.53  | 1.09  |
| <i>lpg2390</i> | proline/betaine transporter (major facilitator family transp <i>proP1</i> |              | Transport and binding                   | 8.932  | 7.341  | 8.091  | 7.053  | 8.55E-02 | 1.00E-01 | -1.59 | -1.04 |
| <i>lpg2390</i> | proline/betaine transporter (major facilitator family transp <i>proP1</i> |              | Transport and binding                   | 8.632  | 7.793  | 8.525  | 7.680  | 1.54E-01 | 2.42E-02 | -0.84 | -0.84 |
| <i>lpg2391</i> | <i>sdbC</i>                                                               | <i>sdbC</i>  | Named proteins of general function      | 10.828 | 12.401 | 11.549 | 10.765 | 3.56E-06 | 1.04E-03 | 1.57  | -0.78 |
| <i>lpg2391</i> | <i>sdbC</i>                                                               | <i>sdbC</i>  | Named proteins of general function      | 10.789 | 12.426 | 11.588 | 10.881 | 7.34E-06 | 1.25E-03 | 1.64  | -0.71 |
| <i>lpg2392</i> | leucine rich repeat protein family                                        | <i>legL6</i> | Named proteins of general function      | 9.669  | 10.257 | 9.602  | 9.688  | 1.13E-01 | 9.06E-01 | 0.59  | 0.09  |
| <i>lpg2392</i> | leucine rich repeat protein family                                        | <i>legL6</i> | Named proteins of general function      | 9.787  | 10.073 | 9.208  | 9.602  | 4.26E-01 | 6.46E-01 | 0.29  | 0.39  |
| <i>lpg2393</i> | bacterioferritin (cytochrome b1)                                          |              | Energy Metabolism                       | 11.384 | 9.837  | 13.388 | 9.601  | 2.04E-02 | 4.51E-05 | -1.55 | -3.79 |
| <i>lpg2393</i> | bacterioferritin (cytochrome b1)                                          |              | Energy Metabolism                       | 11.354 | 9.980  | 13.381 | 9.745  | 9.08E-02 | 9.28E-05 | -1.37 | -3.64 |
| <i>lpg2394</i> | small ORF (77aa)                                                          |              | ORFs of unknown function (unique)       | 8.381  | 7.913  | 9.760  | 7.669  | 4.57E-01 | 3.25E-02 | -0.47 | -2.09 |
| <i>lpg2394</i> | small ORF (77aa)                                                          |              | ORFs of unknown function (unique)       | 7.628  | 6.772  | 9.176  | 7.716  | 5.25E-01 | 2.39E-01 | -0.86 | -1.46 |
| <i>lpg2395</i> | ORF                                                                       |              | ORFs of unknown function (unique)       | 9.980  | 12.338 | 14.309 | 9.358  | 7.01E-02 | 2.08E-04 | 2.36  | -4.95 |
| <i>lpg2395</i> | ORF                                                                       |              | ORFs of unknown function (unique)       | 9.998  | 13.384 | 14.364 | 10.202 | 8.85E-03 | 8.13E-03 | 3.39  | -4.16 |
| <i>lpg2396</i> | transcriptional regulator                                                 |              | Transcription factors / DNA binding prc | 8.813  | 9.387  | 11.064 | 9.684  | 3.61E-01 | 8.17E-03 | 0.57  | -1.38 |
| <i>lpg2396</i> | transcriptional regulator                                                 |              | Transcription factors / DNA binding prc | 8.013  | 9.457  | 10.810 | 9.627  | 4.85E-02 | 1.45E-02 | 1.44  | -1.18 |
| <i>lpg2397</i> | secreted peptidase (cell wall endopeptidase)                              |              | Protein fate / hydrolases / secretion   | 10.079 | 9.496  | 10.954 | 10.306 | 1.39E-01 | 2.40E-01 | -0.58 | -0.65 |
| <i>lpg2397</i> | secreted peptidase (cell wall endopeptidase)                              |              | Protein fate / hydrolases / secretion   | 10.122 | 9.618  | 10.975 | 10.434 | 7.11E-02 | 3.15E-01 | -0.50 | -0.54 |
| <i>lpg2398</i> | aminoglycoside 6'-N-acetyltransferase                                     |              | Named proteins of general function      | 10.332 | 8.150  | 10.833 | 8.313  | 1.30E-03 | 1.03E-03 | -2.18 | -2.52 |
| <i>lpg2398</i> | aminoglycoside 6'-N-acetyltransferase                                     |              | Named proteins of general function      | 10.113 | 7.721  | 10.503 | 8.493  | 1.58E-02 | 1.20E-02 | -2.39 | -2.01 |
| <i>lpg2399</i> | unknown virulence protein                                                 |              | Toxin production / other pathogen func  | 8.687  | 8.075  | 12.770 | 8.259  | 4.60E-01 | 5.19E-05 | -0.61 | -4.51 |
| <i>lpg2399</i> | unknown virulence protein                                                 |              | Toxin production / other pathogen func  | 8.920  | 7.940  | 12.745 | 8.487  | 3.20E-01 | 2.31E-04 | -0.98 | -4.26 |
| <i>lpg2400</i> | unnamed protein product                                                   | <i>legL7</i> | Unknown / hypothetical proteins         | 9.791  | 10.078 | 9.624  | 9.037  | 5.62E-01 | 6.27E-01 | 0.29  | -0.59 |
| <i>lpg2400</i> | unnamed protein product                                                   | <i>legL7</i> | Unknown / hypothetical proteins         | 9.889  | 9.778  | 9.336  | 9.336  | 7.26E-01 | 5.96E-01 | 0.08  | -0.44 |
| <i>lpg2401</i> | putative secreted esterase                                                |              | Named proteins of general function      | 9.429  | 10.372 | 9.708  | 9.663  | 3.96E-02 | 9.22E-01 | 0.94  | -0.05 |
| <i>lpg2401</i> | putative secreted esterase                                                |              | Named proteins of general function      | 9.407  | 10.867 | 9.794  | 9.828  | 1.57E-03 | 9.50E-01 | 1.46  | 0.03  |
| <i>lpg2402</i> | regulatory protein (transcriptional regulator, LysR)                      |              | Transcription factors / DNA binding prc | 10.960 | 12.491 | 13.311 | 12.363 | 3.38E-02 | 3.02E-01 | 1.53  | -0.95 |
| <i>lpg2402</i> | regulatory protein (transcriptional regulator, LysR)                      |              | Transcription factors / DNA binding prc | 10.901 | 12.513 | 13.174 | 12.453 | 2.91E-02 | 4.42E-01 | 1.61  | -0.72 |
| <i>lpg2403</i> | ORF                                                                       |              | ORFs of unknown function (unique)       | 10.089 | 10.632 | 10.893 | 9.696  | 2.40E-01 | 2.07E-02 | 0.54  | -1.20 |
| <i>lpg2403</i> | ORF                                                                       |              | ORFs of unknown function (unique)       | 10.067 | 10.703 | 10.445 | 9.952  | 1.39E-01 | 2.12E-01 | 0.64  | -0.49 |
| <i>lpg2404</i> | ORF                                                                       |              | ORFs of unknown function (unique)       | 9.022  | 8.895  | 9.727  | 8.444  | 8.70E-01 | 2.68E-02 | -0.13 | -1.28 |
| <i>lpg2404</i> | ORF                                                                       |              | ORFs of unknown function (unique)       | 9.052  | 9.689  | 9.389  | 8.363  | 2.98E-01 | 1.94E-01 | 0.64  | -1.03 |
| <i>lpg2405</i> | mutator <i>mutT</i> protein                                               | <i>mutT</i>  | DNA/RNA degradation / restriction       | 9.147  | 9.276  | 10.223 | 8.703  | 4.93E-01 | 9.55E-02 | 0.13  | -1.52 |
| <i>lpg2405</i> | mutator <i>mutT</i> protein                                               | <i>mutT</i>  | DNA/RNA degradation / restriction       | 9.283  | 10.132 | 10.096 | 9.678  | 4.34E-01 | 6.37E-01 | 0.85  | -0.42 |
| <i>lpg2406</i> | ORF                                                                       |              | ORFs of unknown function (unique)       | 11.368 | 11.210 | 13.347 | 11.680 | 8.51E-01 | 6.94E-03 | -0.16 | -1.67 |
| <i>lpg2406</i> | ORF                                                                       |              | ORFs of unknown function (unique)       | 11.482 | 11.907 | 13.392 | 12.187 | 6.00E-01 | 8.10E-02 | 0.43  | -1.21 |
| <i>lpg2407</i> | small ORF (101aa)                                                         |              | ORFs of unknown function (unique)       | 8.162  | 8.706  | 8.713  | 7.407  | 3.20E-01 | 2.11E-01 | 0.54  | -1.31 |
| <i>lpg2407</i> | small ORF (101aa)                                                         |              | ORFs of unknown function (unique)       | 7.543  | 9.205  | 8.785  | 8.764  | 6.87E-02 | 9.87E-01 | 1.66  | -0.02 |
| <i>lpg2408</i> | hypothetical protein                                                      |              | Unknown / hypothetical proteins         | 9.186  | 10.062 | 10.601 | 9.472  | 1.65E-01 | 8.02E-02 | 0.88  | -1.13 |
| <i>lpg2408</i> | hypothetical protein                                                      |              | Unknown / hypothetical proteins         | 8.992  | 9.051  | 9.416  | 8.314  | 9.02E-01 | 1.55E-01 | 0.06  | -1.10 |
| <i>lpg2409</i> | ORF                                                                       | <i>ceg29</i> | ORFs of unknown function (unique)       | 10.352 | 12.935 | 10.196 | 11.393 | 2.06E-04 | 1.37E-01 | 2.58  | 1.20  |
| <i>lpg2409</i> | ORF                                                                       | <i>ceg29</i> | ORFs of unknown function (unique)       | 9.910  | 12.905 | 10.145 | 11.520 | 1.51E-03 | 6.04E-02 | 2.99  | 1.38  |
| <i>lpg2410</i> | hypothetical (serine protease?) (membrane spanning pro <i>VpdA</i>        |              | Named proteins of general function      | 9.882  | 11.325 | 11.655 | 8.947  | 9.55E-02 | 2.30E-02 | 1.44  | -2.71 |
| <i>lpg2410</i> | hypothetical (serine protease?) (membrane spanning pro <i>VpdA</i>        |              | Named proteins of general function      | 10.137 | 11.894 | 12.166 | 9.840  | 4.51E-02 | 3.48E-03 | 1.76  | -2.33 |
| <i>lpg2411</i> | ORF                                                                       |              | ORFs of unknown function (unique)       | 8.600  | 11.538 | 8.592  | 10.581 | 1.72E-03 | 8.90E-02 | 2.94  | 1.99  |
| <i>lpg2411</i> | ORF                                                                       |              | ORFs of unknown function (unique)       | 8.183  | 11.697 | 7.540  | 10.304 | 1.94E-03 | 8.52E-04 | 3.51  | 2.76  |
| <i>lpg2412</i> | AMPC cephalosporinase (AmpC beta-lactamase) (penici <i>ampC</i>           |              | Cell envelope synthesis, Detoxification | 8.807  | 9.369  | 8.993  | 9.912  | 3.87E-01 | 6.25E-02 | 0.56  | 0.92  |
| <i>lpg2412</i> | AMPC cephalosporinase (AmpC beta-lactamase) (penici <i>ampC</i>           |              | Cell envelope synthesis, Detoxification | 9.382  | 9.166  | 8.967  | 10.291 | 4.77E-01 | 3.02E-02 | -0.22 | 1.32  |
| <i>lpg2413</i> | small ORF (145aa)                                                         |              | ORFs of unknown function (unique)       | 11.656 | 12.856 | 13.174 | 10.274 | 2.59E-02 | 7.87E-05 | 1.20  | -2.90 |
| <i>lpg2413</i> | small ORF (145aa)                                                         |              | ORFs of unknown function (unique)       | 11.760 | 12.914 | 13.236 | 10.410 | 2.33E-02 | 6.73E-05 | 1.15  | -2.83 |
| <i>lpg2414</i> | small ORF (97aa)                                                          |              | ORFs of unknown function (unique)       | 10.768 | 10.415 | 11.009 | 10.436 | 4.73E-01 | 1.61E-01 | -0.35 | -0.57 |
| <i>lpg2414</i> | small ORF (97aa)                                                          |              | ORFs of unknown function (unique)       | 11.004 | 10.529 | 11.046 | 10.877 | 4.62E-01 | 8.29E-01 | -0.47 | -0.17 |
| <i>lpg2415</i> | transmembrane protein                                                     |              | Unknown / hypothetical proteins         | 9.954  | 9.548  | 12.924 | 8.709  | 6.72E-01 | 2.09E-03 | -0.41 | -4.21 |
| <i>lpg2415</i> | transmembrane protein                                                     |              | Unknown / hypothetical proteins         | 9.674  | 10.754 | 12.940 | 9.121  | 4.31E-01 | 6.41E-03 | 1.08  | -3.82 |
| <i>lpg2416</i> | ankyrin repeat containing protein?                                        | <i>legA1</i> | Named proteins of general function      | 8.681  | 8.097  | 9.104  | 6.999  | 2.31E-01 | 1.46E-07 | -0.58 | -2.11 |
| <i>lpg2416</i> | ankyrin repeat containing protein?                                        | <i>legA1</i> | Named proteins of general function      | 8.705  | 8.088  | 9.126  | 7.403  | 2.39E-01 | 2.14E-02 | -0.62 | -1.72 |
| <i>lpg2417</i> | ORF                                                                       |              | ORFs of unknown function (unique)       | 11.483 | 8.401  | 9.524  | 10.687 | 2.94E-03 | 6.50E-02 | -3.08 | 1.16  |
| <i>lpg2417</i> | ORF                                                                       |              | ORFs of unknown function (unique)       | 11.622 | 8.994  | 9.342  | 10.729 | 3.93E-05 | 4.90E-02 | -2.63 | 1.39  |

|                |                                                                             |             |                                          |        |        |        |        |          |          |       |       |
|----------------|-----------------------------------------------------------------------------|-------------|------------------------------------------|--------|--------|--------|--------|----------|----------|-------|-------|
| <i>lpg2418</i> | penicillin-binding protein AmpH, putative                                   |             | Toxin production / other pathogen func   | 11.490 | 9.532  | 9.498  | 10.661 | 4.81E-02 | 1.55E-01 | -1.96 | 1.16  |
| <i>lpg2418</i> | penicillin-binding protein AmpH, putative                                   |             | Toxin production / other pathogen func   | 10.720 | 9.852  | 8.805  | 10.719 | 6.13E-03 | 3.69E-03 | -0.87 | 1.91  |
| <i>lpg2419</i> | ORF                                                                         |             | ORFs of unknown function (unique)        | 10.191 | 9.915  | 9.735  | 11.002 | 7.17E-01 | 1.10E-01 | -0.28 | 1.27  |
| <i>lpg2419</i> | ORF                                                                         |             | ORFs of unknown function (unique)        | 10.421 | 9.816  | 9.755  | 11.067 | 4.56E-01 | 1.73E-01 | -0.60 | 1.31  |
| <i>lpg2420</i> | ORF                                                                         |             | ORFs of unknown function (unique)        | 10.970 | 10.932 | 10.446 | 12.368 | 9.32E-01 | 1.66E-05 | -0.04 | 1.92  |
| <i>lpg2420</i> | ORF                                                                         |             | ORFs of unknown function (unique)        | 10.581 | 10.860 | 10.266 | 12.296 | 7.29E-01 | 1.35E-06 | 0.28  | 2.03  |
| <i>lpg2422</i> | hypothetical protein                                                        |             | Unknown / hypothetical proteins          | 6.779  | 8.310  | 11.115 | 7.791  | 3.13E-01 | 4.78E-02 | 1.53  | -3.32 |
| <i>lpg2422</i> | hypothetical protein                                                        |             | Unknown / hypothetical proteins          | 7.240  | 7.459  | 11.623 | 8.549  | 8.68E-01 | 8.08E-03 | 0.22  | -3.07 |
| <i>lpg2423</i> | hypothetical protein-transmembrane region and signal peptide predict        |             | Named proteins of general function       | 9.720  | 10.325 | 10.378 | 9.606  | 2.10E-01 | 2.23E-02 | 0.61  | -0.77 |
| <i>lpg2423</i> | hypothetical protein-transmembrane region and signal peptide predict        |             | Named proteins of general function       | 9.560  | 11.190 | 10.367 | 10.252 | 9.10E-02 | 8.77E-01 | 1.63  | -0.12 |
| <i>lpg2424</i> | ORF                                                                         |             | ORFs of unknown function (unique)        | 10.338 | 11.987 | 11.535 | 9.106  | 1.07E-03 | 1.12E-03 | 1.65  | -2.43 |
| <i>lpg2424</i> | ORF                                                                         |             | ORFs of unknown function (unique)        | 9.945  | 12.226 | 10.507 | 10.570 | 9.31E-04 | 9.21E-01 | 2.28  | 0.06  |
| <i>lpg2425</i> | ORF                                                                         |             | ORFs of unknown function (unique)        | 11.084 | 11.993 | 11.053 | 11.310 | 9.62E-04 | 4.01E-01 | 0.91  | 0.26  |
| <i>lpg2425</i> | ORF                                                                         |             | ORFs of unknown function (unique)        | 10.756 | 11.797 | 10.434 | 11.065 | 3.38E-02 | 1.09E-02 | 1.04  | 0.63  |
| <i>lpg2426</i> | malonate decarboxylase alpha subunit                                        | <i>mdcA</i> | Energy Metabolism                        | 9.685  | 9.221  | 11.492 | 8.358  | 5.32E-01 | 1.13E-02 | -0.46 | -3.13 |
| <i>lpg2426</i> | malonate decarboxylase alpha subunit                                        | <i>mdcA</i> | Energy Metabolism                        | 9.419  | 9.311  | 11.529 | 8.878  | 8.65E-01 | 2.71E-02 | -0.11 | -2.65 |
| <i>lpg2427</i> | acetyl coenzyme A carboxylase, carboxyltransferase sub                      | <i>mdcB</i> | Energy Metabolism                        | 9.226  | 8.615  | 11.637 | 8.511  | 3.96E-01 | 1.47E-04 | -0.61 | -3.13 |
| <i>lpg2427</i> | acetyl coenzyme A carboxylase, carboxyltransferase sub                      | <i>mdcB</i> | Energy Metabolism                        | 9.249  | 8.999  | 11.553 | 8.484  | 6.55E-01 | 1.95E-04 | -0.25 | -3.07 |
| <i>lpg2428</i> | malonate decarboxylase gamma subunit                                        | <i>mdcC</i> | Energy Metabolism                        | 8.885  | 7.843  | 12.086 | 7.875  | 3.08E-01 | 3.69E-03 | -1.04 | -4.21 |
| <i>lpg2428</i> | malonate decarboxylase gamma subunit                                        | <i>mdcC</i> | Energy Metabolism                        | 8.843  | 8.119  | 12.099 | 8.042  | 4.20E-01 | 1.81E-02 | -0.72 | -4.06 |
| <i>lpg2429</i> | ORF (MdcE? malonate decarboxylase?)                                         | <i>mdcG</i> | Energy Metabolism                        | 8.302  | 8.189  | 10.737 | 6.758  | 9.25E-01 | 3.49E-04 | -0.11 | -3.98 |
| <i>lpg2429</i> | ORF (MdcE? malonate decarboxylase?)                                         | <i>mdcG</i> | Energy Metabolism                        | 8.929  | 7.946  | 10.745 | 7.072  | 2.12E-01 | 6.51E-03 | -0.98 | -3.67 |
| <i>lpg2430</i> | 2-(5-triphosphoribosyl)-3'-dephosphocoenzyme A synthetase                   | <i>mdcB</i> | Signal transduction / other regulatory f | 9.745  | 7.224  | 10.550 | 7.562  | 3.74E-04 | 1.15E-04 | -2.52 | -2.99 |
| <i>lpg2430</i> | 2-(5-triphosphoribosyl)-3'-dephosphocoenzyme A synthetase                   | <i>mdcB</i> | Signal transduction / other regulatory f | 9.884  | 8.024  | 10.543 | 8.195  | 1.07E-04 | 8.80E-05 | -1.86 | -2.35 |
| <i>lpg2431</i> | putative malonyl-CoA acyl-carrier-protein transacylase                      |             | Lipid Metabolism                         | 8.747  | 8.984  | 9.835  | 9.474  | 8.04E-01 | 5.33E-01 | 0.24  | -0.36 |
| <i>lpg2431</i> | putative malonyl-CoA acyl-carrier-protein transacylase                      |             | Lipid Metabolism                         | 9.085  | 9.647  | 9.504  | 9.879  | 4.35E-01 | 6.00E-01 | 0.56  | 0.37  |
| <i>lpg2432</i> | alkaline phosphatase                                                        | <i>phoA</i> | Named proteins of general function       | 7.624  | 8.294  | 7.956  | 7.162  | 5.09E-01 | 6.04E-01 | 0.67  | -0.79 |
| <i>lpg2432</i> | alkaline phosphatase                                                        | <i>phoA</i> | Named proteins of general function       | 7.476  | 8.688  | 7.317  | 8.595  | 2.09E-01 | 1.30E-01 | 1.21  | 1.28  |
| <i>lpg2433</i> | ORF                                                                         |             | ORFs of unknown function (unique)        | 8.541  | 9.228  | 9.569  | 9.100  | 2.72E-01 | 5.21E-01 | 0.69  | -0.47 |
| <i>lpg2433</i> | ORF                                                                         |             | ORFs of unknown function (unique)        | 8.166  | 9.553  | 9.397  | 9.699  | 7.05E-02 | 5.68E-01 | 1.39  | 0.30  |
| <i>lpg2434</i> | conserved hypothetical protein                                              |             | Unknown / hypothetical proteins          | 9.624  | 10.820 | 10.810 | 9.599  | 4.56E-03 | 9.40E-02 | 1.20  | -1.21 |
| <i>lpg2434</i> | conserved hypothetical protein                                              |             | Unknown / hypothetical proteins          | 9.763  | 10.705 | 11.061 | 9.862  | 5.08E-02 | 5.90E-02 | 0.94  | -1.20 |
| <i>lpg2435</i> | ORF                                                                         |             | ORFs of unknown function (unique)        | 10.493 | 9.687  | 11.785 | 9.370  | 1.01E-01 | 4.02E-03 | -0.81 | -2.41 |
| <i>lpg2435</i> | ORF                                                                         |             | ORFs of unknown function (unique)        | 10.655 | 9.795  | 11.816 | 9.555  | 8.38E-02 | 5.70E-03 | -0.86 | -2.26 |
| <i>lpg2436</i> | small ORF (126aa)                                                           |             | ORFs of unknown function (unique)        | 10.175 | 8.595  | 10.546 | 8.473  | 4.62E-02 | 1.66E-04 | -1.58 | -2.07 |
| <i>lpg2436</i> | small ORF (126aa)                                                           |             | ORFs of unknown function (unique)        | 10.489 | 9.704  | 10.594 | 8.755  | 3.55E-01 | 1.34E-03 | -0.79 | -1.84 |
| <i>lpg2437</i> | small ORF (62aa)                                                            |             | ORFs of unknown function (unique)        | 7.797  | 7.980  | 9.599  | 7.993  | 7.93E-01 | 5.43E-03 | 0.18  | -1.61 |
| <i>lpg2437</i> | small ORF (62aa)                                                            |             | ORFs of unknown function (unique)        | 8.062  | 8.047  | 9.111  | 8.542  | 9.85E-01 | 1.93E-01 | -0.02 | -0.57 |
| <i>lpg2438</i> | florfenicol efflux pump (multidrug resistance transporter, drug resistance) |             | Transport and binding, Toxin production  | 9.610  | 10.312 | 10.185 | 10.191 | 2.28E-01 | 9.91E-01 | 0.70  | 0.01  |
| <i>lpg2438</i> | florfenicol efflux pump (multidrug resistance transporter, drug resistance) |             | Transport and binding, Toxin production  | 9.569  | 10.349 | 9.926  | 10.114 | 2.01E-01 | 6.81E-01 | 0.78  | 0.19  |
| <i>lpg2439</i> | NADPH-dependent FMN reductase domain protein (chromate reductase)           |             | Metabolism of Cofactors and Vitamins     | 11.133 | 12.181 | 11.882 | 12.067 | 1.87E-05 | 3.95E-01 | 1.05  | 0.18  |
| <i>lpg2439</i> | NADPH-dependent FMN reductase domain protein (chromate reductase)           |             | Metabolism of Cofactors and Vitamins     | 11.126 | 12.162 | 11.844 | 12.061 | 1.65E-05 | 3.07E-01 | 1.04  | 0.22  |
| <i>lpg2440</i> | glutathione S-transferase                                                   |             | Detoxification / adaptation              | 11.262 | 11.144 | 12.090 | 11.028 | 5.32E-01 | 1.47E-03 | -0.12 | -1.06 |
| <i>lpg2440</i> | glutathione S-transferase                                                   |             | Detoxification / adaptation              | 11.269 | 11.243 | 12.090 | 11.407 | 9.03E-01 | 1.98E-02 | -0.03 | -0.68 |
| <i>lpg2441</i> | DNA binding protein (3-demethylubiquinone-9 3-methyltransferase)            |             | Transcription factors / DNA binding prc  | 9.631  | 8.458  | 11.175 | 8.615  | 3.66E-02 | 5.56E-04 | -1.17 | -2.56 |
| <i>lpg2441</i> | DNA binding protein (3-demethylubiquinone-9 3-methyltransferase)            |             | Transcription factors / DNA binding prc  | 9.767  | 8.710  | 11.120 | 9.332  | 1.21E-01 | 2.72E-02 | -1.06 | -1.79 |
| <i>lpg2442</i> | PhnB protein                                                                |             | Named proteins of general function       | 10.543 | 10.686 | 12.538 | 10.443 | 8.17E-01 | 5.14E-03 | 0.14  | -2.10 |
| <i>lpg2442</i> | PhnB protein                                                                |             | Named proteins of general function       | 10.642 | 10.699 | 12.636 | 10.846 | 9.24E-01 | 3.03E-03 | 0.06  | -1.79 |
| <i>lpg2443</i> | ORF                                                                         |             | ORFs of unknown function (unique)        | 11.763 | 13.069 | 11.390 | 11.437 | 4.71E-05 | 8.43E-01 | 1.31  | 0.05  |
| <i>lpg2443</i> | ORF                                                                         |             | ORFs of unknown function (unique)        | 11.609 | 13.070 | 11.247 | 11.343 | 4.75E-05 | 7.43E-01 | 1.46  | 0.10  |
| <i>lpg2444</i> | ORF                                                                         |             | ORFs of unknown function (unique)        | 9.244  | 11.242 | 11.033 | 7.202  | 1.84E-03 | 1.30E-04 | 2.00  | -3.83 |
| <i>lpg2444</i> | ORF                                                                         |             | ORFs of unknown function (unique)        | 9.329  | 11.435 | 10.914 | 7.869  | 1.67E-03 | 2.29E-03 | 2.11  | -3.05 |
| <i>lpg2445</i> | 161aa ORF (serpentine receptor Sre?)                                        |             | Unknown / hypothetical proteins          | 10.259 | 8.565  | 8.800  | 8.214  | 2.04E-02 | 4.00E-01 | -1.69 | -0.59 |
| <i>lpg2445</i> | 161aa ORF (serpentine receptor Sre?)                                        |             | Unknown / hypothetical proteins          | 10.373 | 8.024  | 7.534  | 7.697  | 1.73E-05 | 9.03E-01 | -2.35 | 0.16  |
| <i>lpg2446</i> | small ORF (92aa)                                                            |             | ORFs of unknown function (unique)        | 9.894  | 10.007 | 9.943  | 8.965  | 7.36E-01 | 4.59E-03 | 0.11  | -0.98 |
| <i>lpg2446</i> | small ORF (92aa)                                                            |             | ORFs of unknown function (unique)        | 9.673  | 9.602  | 9.408  | 9.003  | 7.43E-01 | 4.40E-01 | -0.07 | -0.40 |
| <i>lpg2447</i> | endonuclease containing URI domain, putative pseudogene                     |             | Viral functions / Phage / Transposases   | 9.792  | 9.642  | 8.946  | 9.397  | 5.86E-01 | 3.19E-01 | -0.15 | 0.45  |
| <i>lpg2447</i> | endonuclease containing URI domain, putative pseudogene                     |             | Viral functions / Phage / Transposases   | 9.777  | 10.048 | 8.638  | 10.012 | 6.21E-01 | 2.88E-02 | 0.27  | 1.37  |
| <i>lpg2449</i> | D-alanyl-D-alanine dipeptidase                                              |             | Protein fate / hydrolases / secretion    | 9.369  | 9.086  | 9.911  | 9.700  | 2.14E-01 | 3.84E-01 | -0.28 | -0.21 |
| <i>lpg2449</i> | D-alanyl-D-alanine dipeptidase                                              |             | Protein fate / hydrolases / secretion    | 9.303  | 9.506  | 9.726  | 9.777  | 3.50E-01 | 8.39E-01 | 0.20  | 0.05  |
| <i>lpg2450</i> | integral membrane protein (zinc uptake?)                                    |             | Named proteins of general function       | 9.721  | 10.316 | 9.961  | 10.417 | 3.61E-01 | 5.01E-01 | 0.59  | 0.46  |
| <i>lpg2450</i> | integral membrane protein (zinc uptake?)                                    |             | Named proteins of general function       | 9.645  | 10.224 | 9.645  | 10.192 | 3.78E-01 | 4.15E-01 | 0.58  | 0.55  |
| <i>lpg2451</i> | putative N-hydroxyarylamine O-acetyltransferase                             |             | Named proteins of general function       | 11.868 | 13.666 | 10.893 | 12.590 | 1.42E-04 | 5.81E-04 | 1.80  | 1.70  |
| <i>lpg2451</i> | putative N-hydroxyarylamine O-acetyltransferase                             |             | Named proteins of general function       | 11.719 | 13.951 | 10.962 | 12.962 | 6.40E-08 | 6.29E-07 | 2.23  | 2.00  |

|                |                                                                      |                  |                                          |        |        |        |        |          |          |       |       |
|----------------|----------------------------------------------------------------------|------------------|------------------------------------------|--------|--------|--------|--------|----------|----------|-------|-------|
| <i>lpg2452</i> | hypothetical protein                                                 | <i>legA14</i>    | Unknown / hypothetical proteins          | 10.194 | 9.484  | 9.579  | 10.157 | 1.03E-01 | 5.94E-02 | -0.71 | 0.58  |
| <i>lpg2452</i> | hypothetical protein                                                 | <i>legA14</i>    | Unknown / hypothetical proteins          | 9.958  | 9.612  | 9.427  | 10.031 | 1.34E-01 | 3.86E-01 | -0.35 | 0.60  |
| <i>lpg2453</i> | small ORF (149aa)                                                    |                  | ORFs of unknown function (unique)        | 11.769 | 11.884 | 10.891 | 11.556 | 8.39E-01 | 1.33E-01 | 0.11  | 0.66  |
| <i>lpg2453</i> | small ORF (149aa)                                                    |                  | ORFs of unknown function (unique)        | 11.664 | 11.382 | 10.553 | 11.264 | 7.87E-01 | 3.97E-01 | -0.28 | 0.71  |
| <i>lpg2454</i> | acetyltransferase, GNAT family, ElaA-like protein                    |                  | Named proteins of general function       | 10.727 | 11.151 | 11.449 | 10.428 | 3.24E-01 | 7.89E-02 | 0.42  | -1.02 |
| <i>lpg2454</i> | acetyltransferase, GNAT family, ElaA-like protein                    |                  | Named proteins of general function       | 10.860 | 11.146 | 11.284 | 10.528 | 5.10E-01 | 1.91E-01 | 0.29  | -0.76 |
| <i>lpg2455</i> | ORF                                                                  |                  | ORFs of unknown function (unique)        | 12.553 | 13.513 | 12.174 | 13.726 | 4.46E-01 | 9.49E-02 | 0.96  | 1.55  |
| <i>lpg2455</i> | ORF                                                                  |                  | ORFs of unknown function (unique)        | 12.590 | 14.670 | 12.098 | 14.465 | 5.15E-10 | 2.34E-07 | 2.08  | 2.37  |
| <i>lpg2456</i> | ORF                                                                  | <i>legA15</i>    | ORFs of unknown function (unique)        | 11.812 | 11.965 | 13.327 | 12.051 | 5.00E-01 | 3.19E-03 | 0.15  | -1.28 |
| <i>lpg2456</i> | ORF                                                                  | <i>legA15</i>    | ORFs of unknown function (unique)        | 11.757 | 12.065 | 13.294 | 12.228 | 2.81E-01 | 1.15E-02 | 0.31  | -1.07 |
| <i>lpg2457</i> | two component response regulator (response regulator receiver)       |                  | Signal transduction / other regulatory f | 9.103  | 9.886  | 10.893 | 9.366  | 1.66E-01 | 6.85E-02 | 0.78  | -1.53 |
| <i>lpg2457</i> | two component response regulator (response regulator receiver)       |                  | Signal transduction / other regulatory f | 8.982  | 9.986  | 10.803 | 9.770  | 9.44E-03 | 2.05E-01 | 1.00  | -1.03 |
| <i>lpg2458</i> | sensory box histidine kinase (two-component sensor histidine kinase) |                  | Signal transduction / other regulatory f | 8.509  | 8.313  | 10.094 | 7.980  | 6.03E-01 | 2.43E-03 | -0.20 | -2.11 |
| <i>lpg2458</i> | sensory box histidine kinase (two-component sensor histidine kinase) |                  | Signal transduction / other regulatory f | 8.349  | 8.758  | 10.109 | 8.618  | 6.86E-01 | 4.32E-02 | 0.41  | -1.49 |
| <i>lpg2459</i> | guanylate cyclase                                                    |                  | Signal transduction / other regulatory f | 8.083  | 8.051  | 11.118 | 5.688  | 9.78E-01 | 2.11E-02 | -0.03 | -5.43 |
| <i>lpg2459</i> | guanylate cyclase                                                    |                  | Signal transduction / other regulatory f | 8.425  | 8.374  | 11.144 | 8.016  | 9.59E-01 | 5.26E-02 | -0.05 | -3.13 |
| <i>lpg2460</i> | hypothetical                                                         |                  | Unknown / hypothetical proteins          | 9.020  | 11.469 | 8.918  | 8.532  | 3.57E-06 | 5.79E-01 | 2.45  | -0.39 |
| <i>lpg2460</i> | hypothetical                                                         |                  | Unknown / hypothetical proteins          | 9.251  | 11.549 | 8.517  | 9.156  | 3.43E-04 | 3.47E-01 | 2.30  | 0.64  |
| <i>lpg2461</i> | ORF                                                                  |                  | ORFs of unknown function (unique)        | 8.626  | 9.918  | 9.358  | 8.627  | 3.76E-02 | 5.38E-01 | 1.29  | -0.73 |
| <i>lpg2461</i> | ORF                                                                  |                  | ORFs of unknown function (unique)        | 8.077  | 9.663  | 8.348  | 8.366  | 7.21E-02 | 9.92E-01 | 1.59  | 0.02  |
| <i>lpg2462</i> | exported protein                                                     |                  | Named proteins of general function       | 11.396 | 10.900 | 10.029 | 11.301 | 3.12E-01 | 3.40E-02 | -0.50 | 1.27  |
| <i>lpg2462</i> | exported protein                                                     |                  | Named proteins of general function       | 11.496 | 11.033 | 9.746  | 11.482 | 7.42E-02 | 1.06E-02 | -0.46 | 1.74  |
| <i>lpg2463</i> | peptide aspartate b-dioxygenase (lipid synthesis)                    |                  | Named proteins of general function       | 11.905 | 12.629 | 10.998 | 12.489 | 9.09E-03 | 6.86E-03 | 0.72  | 1.49  |
| <i>lpg2463</i> | peptide aspartate b-dioxygenase (lipid synthesis)                    |                  | Named proteins of general function       | 11.927 | 12.899 | 10.740 | 12.559 | 3.41E-02 | 2.99E-03 | 0.97  | 1.82  |
| <i>lpg2464</i> | ORF                                                                  | <i>sidM/drrA</i> | ORFs of unknown function (unique)        | 11.336 | 13.004 | 12.883 | 10.461 | 1.20E-02 | 2.01E-04 | 1.67  | -2.42 |
| <i>lpg2464</i> | ORF                                                                  | <i>sidM/drrA</i> | ORFs of unknown function (unique)        | 11.427 | 13.125 | 12.868 | 10.491 | 2.01E-02 | 6.30E-04 | 1.70  | -2.38 |
| <i>lpg2465</i> | SidD                                                                 | <i>sidD</i>      | Toxin production / other pathogen func   | 11.865 | 15.476 | 13.056 | 12.584 | 5.59E-06 | 3.72E-01 | 3.61  | -0.47 |
| <i>lpg2465</i> | SidD                                                                 | <i>sidD</i>      | Toxin production / other pathogen func   | 11.876 | 15.425 | 13.106 | 12.636 | 2.53E-05 | 3.69E-01 | 3.55  | -0.47 |
| <i>lpg2466</i> | hydrogenase expression/formation protein (F420-nonred)               | <i>vhtD</i>      | Named proteins of general function       | 10.742 | 10.017 | 10.899 | 8.066  | 2.24E-01 | 2.51E-03 | -0.72 | -2.83 |
| <i>lpg2466</i> | hydrogenase expression/formation protein (F420-nonred)               | <i>vhtD</i>      | Named proteins of general function       | 10.762 | 10.707 | 10.832 | 9.154  | 9.02E-01 | 1.90E-03 | -0.05 | -1.68 |
| <i>lpg2467</i> | cytochrome c3 hydrogenase alpha chain (hydrogenase/s)                | <i>hydA</i>      | Energy Metabolism                        | 6.800  | 8.547  | 8.630  | 6.318  | 5.14E-02 | 7.89E-02 | 1.75  | -2.31 |
| <i>lpg2467</i> | cytochrome c3 hydrogenase alpha chain (hydrogenase/s)                | <i>hydA</i>      | Energy Metabolism                        | 7.888  | 8.486  | 8.538  | 6.596  | 3.24E-01 | 1.76E-01 | 0.60  | -1.94 |
| <i>lpg2468</i> | sulfhydrogenase delta subunit (cytochrome c3 hydrogenase delta)      | <i>sut</i>       | Energy Metabolism                        | 10.528 | 10.271 | 10.699 | 10.686 | 5.07E-01 | 9.55E-01 | -0.26 | -0.01 |
| <i>lpg2468</i> | sulfhydrogenase delta subunit (cytochrome c3 hydrogenase delta)      | <i>sut</i>       | Energy Metabolism                        | 10.425 | 10.916 | 10.624 | 10.863 | 2.57E-01 | 3.67E-01 | 0.49  | 0.24  |
| <i>lpg2469</i> | hydrogenase/sulfur reductase gamma subunit (cytochrom)               | <i>hydG-2</i>    | Energy Metabolism                        | 12.915 | 13.841 | 13.700 | 14.084 | 6.61E-02 | 3.91E-01 | 0.93  | 0.38  |
| <i>lpg2469</i> | hydrogenase/sulfur reductase gamma subunit (cytochrom)               | <i>hydG-2</i>    | Energy Metabolism                        | 12.946 | 13.854 | 13.722 | 14.112 | 7.72E-02 | 3.77E-01 | 0.91  | 0.39  |
| <i>lpg2470</i> | cytochrome c3 hydrogenase alpha (or beta) chain (sulfhydrogenase)    |                  | Energy Metabolism                        | 9.540  | 9.004  | 9.605  | 9.450  | 1.99E-01 | 7.55E-01 | -0.54 | -0.16 |
| <i>lpg2470</i> | cytochrome c3 hydrogenase alpha (or beta) chain (sulfhydrogenase)    |                  | Energy Metabolism                        | 9.340  | 8.429  | 9.402  | 9.613  | 3.35E-01 | 7.23E-01 | -0.91 | 0.21  |
| <i>lpg2471</i> | hydrogenase expression/formation protein HypE                        | <i>hypE</i>      | Transport and binding                    | 10.709 | 9.317  | 10.288 | 10.074 | 2.08E-04 | 4.52E-01 | -1.39 | -0.21 |
| <i>lpg2471</i> | hydrogenase expression/formation protein HypE                        | <i>hypE</i>      | Transport and binding                    | 10.651 | 9.624  | 9.922  | 10.177 | 3.10E-02 | 4.93E-01 | -1.03 | 0.25  |
| <i>lpg2472</i> | hydrogenase expression/formation protein HypD                        | <i>hypD</i>      | Transport and binding                    | 10.325 | 8.133  | 8.733  | 10.239 | 2.11E-04 | 2.43E-02 | -2.19 | 1.51  |
| <i>lpg2472</i> | hydrogenase expression/formation protein HypD                        | <i>hypD</i>      | Transport and binding                    | 10.159 | 7.968  | 7.511  | 10.232 | 1.15E-03 | 9.06E-03 | -2.19 | 2.72  |
| <i>lpg2473</i> | hydrogenase expression/formation protein HypC                        | <i>hypC</i>      | Transport and binding                    | 10.039 | 9.799  | 8.675  | 10.242 | 6.51E-01 | 2.57E-03 | -0.24 | 1.57  |
| <i>lpg2473</i> | hydrogenase expression/formation protein HypC                        | <i>hypC</i>      | Transport and binding                    | 9.957  | 9.670  | 8.206  | 9.909  | 6.22E-01 | 1.77E-02 | -0.29 | 1.70  |
| <i>lpg2474</i> | hydrogenase maturation protein HypF                                  | <i>hypF</i>      | Transport and binding                    | 9.902  | 9.419  | 9.211  | 8.713  | 2.57E-01 | 7.76E-01 | -0.48 | -0.50 |
| <i>lpg2474</i> | hydrogenase maturation protein HypF                                  | <i>hypF</i>      | Transport and binding                    | 10.057 | 8.965  | 9.448  | 9.051  | 3.26E-01 | 6.56E-01 | -1.09 | -0.40 |
| <i>lpg2475</i> | hydrogenase expression/formation protein (hydrogenase)               | <i>hypB</i>      | Transport and binding                    | 10.493 | 10.004 | 9.116  | 10.741 | 1.58E-01 | 1.00E-02 | -0.49 | 1.62  |
| <i>lpg2475</i> | hydrogenase expression/formation protein (hydrogenase)               | <i>hypB</i>      | Transport and binding                    | 10.377 | 10.149 | 9.056  | 10.930 | 5.64E-01 | 1.04E-02 | -0.23 | 1.87  |
| <i>lpg2476</i> | hydrogenase nickel incorporation protein HypA                        | <i>hypA</i>      | Transport and binding                    | 10.580 | 10.951 | 10.128 | 11.241 | 3.98E-01 | 4.69E-02 | 0.37  | 1.11  |
| <i>lpg2476</i> | hydrogenase nickel incorporation protein HypA                        | <i>hypA</i>      | Transport and binding                    | 10.258 | 11.058 | 8.922  | 11.502 | 3.16E-01 | 4.44E-03 | 0.80  | 2.58  |
| <i>lpg2477</i> | high affinity nickel transport protein                               |                  | Transport and binding                    | 10.696 | 10.755 | 9.629  | 10.861 | 8.21E-01 | 1.62E-02 | 0.06  | 1.23  |
| <i>lpg2477</i> | high affinity nickel transport protein                               |                  | Transport and binding                    | 10.972 | 11.103 | 9.720  | 11.090 | 7.71E-01 | 3.00E-02 | 0.13  | 1.37  |
| <i>lpg2478</i> | glycosyltransferase, group 2 family protein (glycan biosynthesis)    |                  | Metabolism of Complex Carbohydrate:      | 8.472  | 9.487  | 8.749  | 10.176 | 8.54E-03 | 1.37E-02 | 1.02  | 1.43  |
| <i>lpg2478</i> | glycosyltransferase, group 2 family protein (glycan biosynthesis)    |                  | Metabolism of Complex Carbohydrate:      | 8.631  | 9.053  | 8.729  | 10.163 | 3.19E-01 | 1.35E-03 | 0.42  | 1.43  |
| <i>lpg2479</i> | membrane protein?                                                    |                  | Unknown / hypothetical proteins          | 9.755  | 9.649  | 9.843  | 9.399  | 8.60E-01 | 5.37E-01 | -0.11 | -0.44 |
| <i>lpg2479</i> | membrane protein?                                                    |                  | Unknown / hypothetical proteins          | 9.522  | 9.426  | 9.107  | 9.398  | 8.71E-01 | 7.97E-01 | -0.10 | 0.29  |
| <i>lpg2480</i> | cellobiose phosphorylase?                                            |                  | Named proteins of general function       | 10.723 | 10.195 | 10.950 | 11.528 | 5.22E-02 | 5.28E-03 | -0.53 | 0.58  |
| <i>lpg2480</i> | cellobiose phosphorylase?                                            |                  | Named proteins of general function       | 10.760 | 10.136 | 10.901 | 11.565 | 3.70E-02 | 1.57E-03 | -0.62 | 0.66  |
| <i>lpg2481</i> | integral membrane protein (permease) (amino acid metabolite efflux)  |                  | Transport and binding                    | 12.263 | 11.824 | 12.237 | 12.423 | 1.00E-01 | 2.32E-01 | -0.44 | 0.19  |
| <i>lpg2481</i> | integral membrane protein (permease) (amino acid metabolite efflux)  |                  | Transport and binding                    | 12.324 | 11.788 | 12.198 | 12.476 | 7.32E-02 | 9.58E-02 | -0.54 | 0.28  |
| <i>lpg2482</i> | SdbC                                                                 | <i>sdbC</i>      | Named proteins of general function       | 8.404  | 9.460  | 9.621  | 9.251  | 1.80E-02 | 5.31E-01 | 1.06  | -0.37 |
| <i>lpg2482</i> | SdbC                                                                 | <i>sdbC</i>      | Named proteins of general function       | 8.167  | 10.795 | 9.658  | 11.161 | 5.02E-03 | 5.79E-02 | 2.63  | 1.50  |
| <i>lpg2483</i> | hypothetical                                                         |                  | Unknown / hypothetical proteins          | 10.725 | 10.621 | 10.772 | 10.126 | 8.05E-01 | 1.82E-01 | -0.10 | -0.65 |
| <i>lpg2483</i> | hypothetical                                                         |                  | Unknown / hypothetical proteins          | 10.766 | 10.569 | 9.981  | 9.782  | 6.29E-01 | 7.13E-01 | -0.20 | -0.20 |

|                |                                                                                     |                                                    |        |        |        |        |          |          |       |       |
|----------------|-------------------------------------------------------------------------------------|----------------------------------------------------|--------|--------|--------|--------|----------|----------|-------|-------|
| <i>lpg2484</i> | ribosomal protein HAM1 (xanthosine triphosphate pyrophosphatase)                    | Nucleotide Metabolism, Translation                 | 10.110 | 10.067 | 9.888  | 11.190 | 9.53E-01 | 7.80E-03 | -0.04 | 1.30  |
| <i>lpg2484</i> | ribosomal protein HAM1 (xanthosine triphosphate pyrophosphatase)                    | Nucleotide Metabolism, Translation                 | 9.847  | 10.566 | 9.748  | 11.314 | 3.13E-01 | 2.88E-02 | 0.72  | 1.57  |
| <i>lpg2485</i> | TPR domain protein (glycosyltransferase) (O-linked N-acetylglucosaminyltransferase) | Metabolism of Complex Carbohydrate:                | 9.879  | 9.651  | 10.773 | 10.916 | 2.45E-01 | 6.80E-01 | -0.23 | 0.14  |
| <i>lpg2485</i> | TPR domain protein (glycosyltransferase) (O-linked N-acetylglucosaminyltransferase) | Metabolism of Complex Carbohydrate:                | 10.019 | 9.066  | 10.819 | 10.978 | 1.15E-02 | 6.22E-01 | -0.95 | 0.16  |
| <i>lpg2486</i> | phosphomannomutase                                                                  | Carbohydrate Metabolism                            | 12.496 | 12.141 | 9.572  | 13.536 | 3.85E-01 | 1.57E-03 | -0.35 | 3.96  |
| <i>lpg2486</i> | phosphomannomutase                                                                  | Carbohydrate Metabolism                            | 12.484 | 12.045 | 9.255  | 13.555 | 3.26E-01 | 8.47E-03 | -0.44 | 4.30  |
| <i>lpg2487</i> | deoxyuridinetriphosphatase (deoxyuridine 5'-triphosphate <i>dut</i> )               | Nucleotide Metabolism                              | 10.530 | 11.194 | 10.338 | 12.101 | 1.41E-01 | 1.26E-03 | 0.66  | 1.76  |
| <i>lpg2487</i> | deoxyuridinetriphosphatase (deoxyuridine 5'-triphosphate <i>dut</i> )               | Nucleotide Metabolism                              | 10.544 | 11.053 | 10.194 | 12.124 | 2.88E-01 | 9.93E-04 | 0.51  | 1.93  |
| <i>lpg2488</i> | phosphopantothenoylcysteine decarboxylase/phosphopantothenate-c                     | Metabolism of Cofactors and Vitamins               | 9.917  | 11.954 | 9.865  | 11.588 | 8.69E-05 | 7.51E-05 | 2.04  | 1.72  |
| <i>lpg2488</i> | phosphopantothenoylcysteine decarboxylase/phosphopantothenate-c                     | Metabolism of Cofactors and Vitamins               | 10.180 | 11.915 | 9.729  | 11.665 | 8.43E-07 | 2.48E-06 | 1.74  | 1.94  |
| <i>lpg2489</i> | DNA repair protein RadC                                                             | Replication and Repair                             | 9.369  | 9.935  | 9.235  | 9.707  | 4.56E-02 | 5.33E-01 | 0.57  | 0.47  |
| <i>lpg2489</i> | DNA repair protein RadC                                                             | Replication and Repair                             | 9.442  | 9.749  | 7.983  | 10.091 | 1.54E-01 | 1.42E-01 | 0.31  | 2.11  |
| <i>lpg2490</i> | LepB, non-muscle myosin heavy chain B (endosomal prc <i>lepB</i> )                  | Toxin production / other pathogen func             | 10.921 | 11.495 | 9.931  | 12.320 | 9.12E-02 | 7.22E-06 | 0.57  | 2.39  |
| <i>lpg2490</i> | LepB, non-muscle myosin heavy chain B (endosomal prc <i>lepB</i> )                  | Toxin production / other pathogen func             | 10.813 | 11.568 | 10.022 | 12.413 | 4.63E-02 | 1.48E-05 | 0.76  | 2.39  |
| <i>lpg2491</i> | conserved hypothetical protein                                                      | Unknown / hypothetical proteins                    | 8.490  | 7.889  | 9.770  | 8.703  | 5.35E-01 | 9.94E-02 | -0.60 | -1.07 |
| <i>lpg2491</i> | conserved hypothetical protein                                                      | Unknown / hypothetical proteins                    | 8.648  | 8.062  | 9.517  | 8.820  | 3.04E-01 | 2.50E-01 | -0.59 | -0.70 |
| <i>lpg2492</i> | alcohol dehydrogenase                                                               | Carbohydrate Metabolism, Lipid Metab               | 10.654 | 9.176  | 12.490 | 9.183  | 1.83E-01 | 3.43E-05 | -1.48 | -3.31 |
| <i>lpg2492</i> | alcohol dehydrogenase                                                               | Carbohydrate Metabolism, Lipid Metab               | 10.287 | 9.560  | 12.194 | 9.379  | 1.68E-01 | 6.63E-04 | -0.73 | -2.81 |
| <i>lpg2493</i> | small heat shock protein HspC2 (molecular chaperone)                                | Detoxification / adaptation, Protein fat           | 10.965 | 11.301 | 14.724 | 8.194  | 7.31E-01 | 2.67E-04 | 0.34  | -6.53 |
| <i>lpg2493</i> | small heat shock protein HspC2 (molecular chaperone)                                | Detoxification / adaptation, Protein fat           | 10.957 | 11.642 | 14.730 | 8.435  | 4.24E-01 | 8.55E-05 | 0.68  | -6.30 |
| <i>lpg2494</i> | conserved hypothetical protein                                                      | Unknown / hypothetical proteins                    | 9.546  | 10.308 | 8.985  | 10.321 | 3.62E-01 | 1.56E-01 | 0.76  | 1.34  |
| <i>lpg2494</i> | conserved hypothetical protein                                                      | Unknown / hypothetical proteins                    | 10.012 | 10.453 | 8.792  | 10.390 | 1.21E-01 | 6.74E-02 | 0.44  | 1.60  |
| <i>lpg2495</i> | homospermidine synthase                                                             | <i>hss</i> Named proteins of general function      | 11.996 | 11.589 | 12.993 | 11.085 | 3.70E-01 | 7.66E-04 | -0.41 | -1.91 |
| <i>lpg2495</i> | homospermidine synthase                                                             | <i>hss</i> Named proteins of general function      | 12.020 | 11.815 | 12.961 | 11.700 | 5.82E-01 | 2.08E-03 | -0.20 | -1.26 |
| <i>lpg2496</i> | RNA methyltransferase TrmH family, group 2 (rRNA methylase) (tRNA                   | DNA/RNA degradation / restriction, Tr              | 10.704 | 10.224 | 10.309 | 10.793 | 1.58E-01 | 1.77E-01 | -0.48 | 0.48  |
| <i>lpg2496</i> | RNA methyltransferase TrmH family, group 2 (rRNA methylase) (tRNA                   | DNA/RNA degradation / restriction, Tr              | 10.546 | 10.351 | 10.227 | 10.858 | 4.10E-01 | 1.39E-01 | -0.20 | 0.63  |
| <i>lpg2497</i> | conserved hypothetical protein                                                      | Unknown / hypothetical proteins                    | 10.763 | 9.853  | 11.026 | 9.971  | 1.05E-01 | 2.81E-02 | -0.91 | -1.05 |
| <i>lpg2497</i> | conserved hypothetical protein                                                      | Unknown / hypothetical proteins                    | 10.809 | 9.933  | 11.054 | 10.136 | 5.94E-02 | 3.65E-02 | -0.88 | -0.92 |
| <i>lpg2498</i> | ORF                                                                                 | ORFs of unknown function (unique)                  | 11.411 | 13.320 | 10.913 | 11.946 | 1.76E-05 | 5.63E-02 | 1.91  | 1.03  |
| <i>lpg2498</i> | ORF                                                                                 | ORFs of unknown function (unique)                  | 11.952 | 13.461 | 10.851 | 11.930 | 6.11E-02 | 2.53E-02 | 1.51  | 1.08  |
| <i>lpg2499</i> | lysine decarboxylase                                                                | Amino Acid Metabolism                              | 11.828 | 10.847 | 12.343 | 10.211 | 9.70E-04 | 1.57E-04 | -0.98 | -2.13 |
| <i>lpg2499</i> | lysine decarboxylase                                                                | Amino Acid Metabolism                              | 11.785 | 10.949 | 12.431 | 10.381 | 1.29E-02 | 1.74E-04 | -0.84 | -2.05 |
| <i>lpg2500</i> | carbonic anhydrase Mig5                                                             | Detoxification / adaptation                        | 11.087 | 11.266 | 13.580 | 9.989  | 7.58E-01 | 8.79E-05 | 0.18  | -3.59 |
| <i>lpg2500</i> | carbonic anhydrase Mig5                                                             | Detoxification / adaptation                        | 10.892 | 11.121 | 13.387 | 10.048 | 7.49E-01 | 1.17E-04 | 0.23  | -3.34 |
| <i>lpg2501</i> | multidrug resistance protein D (permease of the major facilitator super             | Transport and binding                              | 11.021 | 10.555 | 10.067 | 10.748 | 2.45E-01 | 1.07E-01 | -0.47 | 0.68  |
| <i>lpg2501</i> | multidrug resistance protein D (permease of the major facilitator super             | Transport and binding                              | 10.870 | 10.854 | 9.802  | 11.508 | 9.88E-01 | 7.29E-02 | -0.02 | 1.71  |
| <i>lpg2502</i> | small ORF (82aa)                                                                    | ORFs of unknown function (unique)                  | 10.624 | 10.113 | 10.128 | 9.233  | 2.77E-01 | 1.68E-01 | -0.51 | -0.89 |
| <i>lpg2502</i> | small ORF (82aa)                                                                    | ORFs of unknown function (unique)                  | 10.592 | 10.220 | 10.212 | 9.479  | 3.53E-01 | 1.39E-01 | -0.37 | -0.73 |
| <i>lpg2503</i> | small ORF (106aa)                                                                   | ORFs of unknown function (unique)                  | 8.783  | 9.450  | 9.772  | 8.475  | 6.48E-02 | 4.59E-02 | 0.67  | -1.30 |
| <i>lpg2503</i> | small ORF (106aa)                                                                   | ORFs of unknown function (unique)                  | 8.751  | 9.303  | 9.854  | 8.584  | 1.03E-01 | 2.10E-02 | 0.55  | -1.27 |
| <i>lpg2504</i> | ORF                                                                                 | ORFs of unknown function (unique)                  | 9.893  | 8.223  | 9.640  | 8.008  | 9.60E-03 | 1.91E-02 | -1.67 | -1.63 |
| <i>lpg2504</i> | ORF                                                                                 | ORFs of unknown function (unique)                  | 10.124 | 10.009 | 9.805  | 9.583  | 9.15E-01 | 8.28E-01 | -0.11 | -0.22 |
| <i>lpg2505</i> | ORF                                                                                 | ORFs of unknown function (unique)                  | 11.534 | 10.624 | 11.308 | 10.061 | 8.53E-02 | 1.12E-02 | -0.91 | -1.25 |
| <i>lpg2505</i> | ORF                                                                                 | ORFs of unknown function (unique)                  | 12.038 | 10.896 | 11.086 | 10.266 | 1.37E-01 | 1.98E-01 | -1.14 | -0.82 |
| <i>lpg2506</i> | sensor histidine kinase/response regulator LuxN                                     | Signal transduction / other regulatory f           | 11.140 | 10.142 | 9.782  | 10.142 | 6.46E-02 | 5.86E-01 | -1.00 | 0.36  |
| <i>lpg2506</i> | sensor histidine kinase/response regulator LuxN                                     | Signal transduction / other regulatory f           | 11.157 | 10.267 | 9.577  | 10.175 | 8.86E-02 | 3.66E-01 | -0.89 | 0.60  |
| <i>lpg2507</i> | ORF                                                                                 | ORFs of unknown function (unique)                  | 10.041 | 10.113 | 9.188  | 10.093 | 9.38E-01 | 5.06E-01 | 0.07  | 0.91  |
| <i>lpg2507</i> | ORF                                                                                 | ORFs of unknown function (unique)                  | 9.534  | 10.194 | 8.322  | 10.698 | 5.97E-01 | 1.98E-01 | 0.66  | 2.38  |
| <i>lpg2508</i> | ORF                                                                                 | ORFs of unknown function (unique)                  | 10.067 | 12.939 | 11.663 | 9.826  | 7.86E-05 | 6.21E-05 | 2.87  | -1.84 |
| <i>lpg2508</i> | ORF                                                                                 | ORFs of unknown function (unique)                  | 9.890  | 12.998 | 11.616 | 10.537 | 6.03E-05 | 1.09E-03 | 3.11  | -1.08 |
| <i>lpg2509</i> | SdeD                                                                                | <i>sdeD</i> Toxin production / other pathogen func | 10.212 | 14.154 | 12.143 | 11.418 | 5.18E-03 | 3.94E-01 | 3.94  | -0.73 |
| <i>lpg2509</i> | SdeD                                                                                | <i>sdeD</i> Toxin production / other pathogen func | 10.194 | 15.143 | 12.062 | 11.819 | 1.57E-04 | 7.66E-01 | 4.95  | -0.24 |
| <i>lpg2510</i> | SdcA                                                                                | <i>sdcA</i> Named proteins of general function     | 10.806 | 12.269 | 13.765 | 10.634 | 8.11E-02 | 4.62E-04 | 1.46  | -3.13 |
| <i>lpg2510</i> | SdcA                                                                                | <i>sdcA</i> Named proteins of general function     | 10.844 | 12.673 | 13.746 | 10.693 | 1.23E-02 | 7.91E-04 | 1.83  | -3.05 |
| <i>lpg2511</i> | SidC, interaptin                                                                    | <i>sidC</i> Toxin production / other pathogen func | 11.194 | 13.491 | 14.353 | 9.840  | 1.02E-02 | 8.10E-05 | 2.30  | -4.51 |
| <i>lpg2511</i> | SidC, interaptin                                                                    | <i>sidC</i> Toxin production / other pathogen func | 11.184 | 13.566 | 14.335 | 9.934  | 9.12E-03 | 6.96E-05 | 2.38  | -4.40 |
| <i>lpg2512</i> | RND multidrug efflux transporter MexF (cation efflux) (AcrB/AcrD/AcrI               | Transport and binding                              | 10.957 | 10.183 | 10.859 | 9.340  | 6.69E-03 | 5.55E-02 | -0.77 | -1.52 |
| <i>lpg2512</i> | RND multidrug efflux transporter MexF (cation efflux) (AcrB/AcrD/AcrI               | Transport and binding                              | 10.885 | 10.777 | 10.132 | 9.848  | 8.32E-01 | 6.23E-01 | -0.11 | -0.28 |
| <i>lpg2513</i> | RND multidrug efflux membrane fusion protein                                        | Transport and binding                              | 11.359 | 11.780 | 10.209 | 11.852 | 2.50E-01 | 4.65E-02 | 0.42  | 1.64  |
| <i>lpg2513</i> | RND multidrug efflux membrane fusion protein                                        | Transport and binding                              | 11.259 | 11.783 | 10.021 | 11.937 | 2.13E-01 | 1.93E-03 | 0.52  | 1.92  |
| <i>lpg2514</i> | outer membrane efflux protein (RND multidrug efflux)                                | Transport and binding                              | 10.578 | 10.686 | 10.509 | 10.616 | 6.68E-01 | 7.95E-01 | 0.11  | 0.11  |
| <i>lpg2514</i> | outer membrane efflux protein (RND multidrug efflux)                                | Transport and binding                              | 9.563  | 10.468 | 9.472  | 9.985  | 9.81E-02 | 2.51E-01 | 0.90  | 0.51  |
| <i>lpg2515</i> | structural toxin protein (hemagglutinin/hemolysin) RtxA                             | Toxin production / other pathogen func             | 10.268 | 10.602 | 11.130 | 10.508 | 2.66E-01 | 6.27E-02 | 0.33  | -0.62 |
| <i>lpg2515</i> | structural toxin protein (hemagglutinin/hemolysin) RtxA                             | Toxin production / other pathogen func             | 10.413 | 10.960 | 11.198 | 10.958 | 1.08E-01 | 5.53E-01 | 0.55  | -0.24 |

|                |                                                                           |             |                                         |        |        |        |        |          |          |       |       |
|----------------|---------------------------------------------------------------------------|-------------|-----------------------------------------|--------|--------|--------|--------|----------|----------|-------|-------|
| <i>lpg2516</i> | major facilitator family transporter (sugar transport, multidrug efflux)  |             | Transport and binding                   | 9.970  | 12.105 | 9.830  | 10.907 | 3.12E-04 | 1.33E-03 | 2.14  | 1.08  |
| <i>lpg2516</i> | major facilitator family transporter (sugar transport, multidrug efflux)  |             | Transport and binding                   | 9.806  | 12.067 | 9.716  | 10.997 | 1.56E-04 | 1.78E-04 | 2.26  | 1.28  |
| <i>lpg2517</i> | transcriptional regulator (AsnC family)                                   |             | Transcription factors / DNA binding prc | 9.425  | 9.067  | 9.439  | 9.967  | 1.93E-01 | 9.37E-02 | -0.36 | 0.53  |
| <i>lpg2517</i> | transcriptional regulator (AsnC family)                                   |             | Transcription factors / DNA binding prc | 9.499  | 9.349  | 9.269  | 10.352 | 6.79E-01 | 8.93E-03 | -0.15 | 1.08  |
| <i>lpg2518</i> | small ORF (113aa)                                                         |             | ORFs of unknown function (unique)       | 9.617  | 11.061 | 9.782  | 9.428  | 3.37E-04 | 2.22E-01 | 1.44  | -0.35 |
| <i>lpg2518</i> | small ORF (113aa)                                                         |             | ORFs of unknown function (unique)       | 9.631  | 11.229 | 9.443  | 9.387  | 1.54E-04 | 8.98E-01 | 1.60  | -0.06 |
| <i>lpg2519</i> | ORF                                                                       |             | ORFs of unknown function (unique)       | 11.854 | 12.712 | 11.037 | 11.512 | 1.58E-02 | 3.40E-01 | 0.86  | 0.47  |
| <i>lpg2519</i> | ORF                                                                       |             | ORFs of unknown function (unique)       | 11.847 | 12.623 | 10.863 | 11.538 | 7.73E-02 | 2.03E-01 | 0.78  | 0.68  |
| <i>lpg2520</i> | small ORF (122aa)                                                         |             | ORFs of unknown function (unique)       | 9.069  | 9.538  | 11.283 | 8.232  | 4.68E-01 | 8.68E-03 | 0.47  | -3.05 |
| <i>lpg2520</i> | small ORF (122aa)                                                         |             | ORFs of unknown function (unique)       | 9.048  | 9.223  | 11.068 | 9.138  | 8.16E-01 | 1.71E-02 | 0.17  | -1.93 |
| <i>lpg2521</i> | transmembrane protein                                                     |             | Unknown / hypothetical proteins         | 12.286 | 11.137 | 13.002 | 12.145 | 1.44E-03 | 2.93E-02 | -1.15 | -0.86 |
| <i>lpg2521</i> | transmembrane protein                                                     |             | Unknown / hypothetical proteins         | 12.277 | 11.088 | 13.012 | 12.253 | 1.66E-03 | 4.08E-02 | -1.19 | -0.76 |
| <i>lpg2522</i> | metal-activated pyridoxal enzyme (low specificity D-threonine aldolase)   |             | Amino Acid Metabolism                   | 10.907 | 9.527  | 10.461 | 10.970 | 1.82E-01 | 5.02E-01 | -1.38 | 0.51  |
| <i>lpg2522</i> | metal-activated pyridoxal enzyme (low specificity D-threonine aldolase)   |             | Amino Acid Metabolism                   | 10.945 | 10.117 | 10.602 | 11.223 | 4.75E-02 | 2.64E-01 | -0.83 | 0.62  |
| <i>lpg2523</i> | ORF                                                                       |             | ORFs of unknown function (unique)       | 9.579  | 9.658  | 9.295  | 9.587  | 9.21E-01 | 7.11E-01 | 0.08  | 0.29  |
| <i>lpg2523</i> | ORF                                                                       |             | ORFs of unknown function (unique)       | 9.984  | 8.758  | 9.114  | 9.724  | 2.19E-02 | 4.20E-01 | -1.23 | 0.61  |
| <i>lpg2524</i> | transcriptional regulator, LuxR family                                    |             | Transcription factors / DNA binding prc | 8.042  | 8.952  | 11.655 | 8.541  | 4.54E-01 | 1.75E-02 | 0.91  | -3.11 |
| <i>lpg2524</i> | transcriptional regulator, LuxR family                                    |             | Transcription factors / DNA binding prc | 8.657  | 7.765  | 11.575 | 8.753  | 2.93E-01 | 1.63E-02 | -0.89 | -2.82 |
| <i>lpg2525</i> | ORF                                                                       |             | ORFs of unknown function (unique)       | 12.301 | 10.245 | 10.657 | 9.300  | 4.41E-04 | 1.02E-01 | -2.06 | -1.36 |
| <i>lpg2525</i> | ORF                                                                       |             | ORFs of unknown function (unique)       | 12.204 | 10.122 | 10.502 | 9.585  | 4.63E-04 | 1.33E-01 | -2.08 | -0.92 |
| <i>lpg2526</i> | ORF                                                                       |             | ORFs of unknown function (unique)       | 11.903 | 13.857 | 12.934 | 12.915 | 1.10E-03 | 9.59E-01 | 1.95  | -0.02 |
| <i>lpg2526</i> | ORF                                                                       |             | ORFs of unknown function (unique)       | 11.825 | 14.190 | 12.946 | 13.016 | 2.44E-05 | 8.39E-01 | 2.36  | 0.07  |
| <i>lpg2527</i> | contains coiled coil domain                                               |             | Unknown / hypothetical proteins         | 8.100  | 8.655  | 11.551 | 6.483  | 6.99E-01 | 1.02E-03 | 0.56  | -5.07 |
| <i>lpg2527</i> | contains coiled coil domain                                               |             | Unknown / hypothetical proteins         | 7.127  | 10.180 | 11.473 | 7.861  | 2.12E-01 | 9.73E-02 | 3.05  | -3.61 |
| <i>lpg2528</i> | alpha-amylase, putative                                                   |             | Named proteins of general function      | 8.887  | 9.658  | 11.976 | 9.029  | 3.07E-01 | 1.42E-04 | 0.70  | -2.95 |
| <i>lpg2528</i> | alpha-amylase, putative                                                   |             | Named proteins of general function      | 9.315  | 10.144 | 12.018 | 10.055 | 1.84E-01 | 2.18E-02 | 0.83  | -1.96 |
| <i>lpg2529</i> | ORF                                                                       |             | ORFs of unknown function (unique)       | 13.814 | 15.578 | 13.646 | 12.778 | 3.43E-02 | 1.31E-01 | 1.76  | -0.87 |
| <i>lpg2529</i> | ORF                                                                       |             | ORFs of unknown function (unique)       | 13.809 | 15.600 | 13.632 | 12.816 | 1.86E-02 | 1.56E-01 | 1.79  | -0.82 |
| <i>lpg2530</i> | 3-deoxy-D-arabino-heptulosonate 7-phosphate (DAH) s <i>aroF</i>           |             | Amino Acid Metabolism                   | 8.240  | 12.240 | 8.708  | 9.874  | 2.17E-05 | 5.27E-04 | 4.00  | 1.17  |
| <i>lpg2530</i> | 3-deoxy-D-arabino-heptulosonate 7-phosphate (DAH) s <i>aroF</i>           |             | Amino Acid Metabolism                   | 8.983  | 12.240 | 8.903  | 10.405 | 3.16E-06 | 2.48E-02 | 3.26  | 1.50  |
| <i>lpg2531</i> | chorismate mutase/prephenate dehydratase (P-protein)                      |             | Amino Acid Metabolism                   | 8.258  | 12.815 | 7.849  | 8.652  | 5.70E-10 | 3.39E-01 | 4.56  | 0.80  |
| <i>lpg2531</i> | chorismate mutase/prephenate dehydratase (P-protein)                      |             | Amino Acid Metabolism                   | 7.966  | 12.966 | 7.923  | 9.213  | 6.28E-07 | 3.59E-01 | 5.00  | 1.29  |
| <i>lpg2532</i> | aspartate aminotransferase (PLP-dependent aminotransferase)               |             | Amino Acid Metabolism, Energy Metab     | 7.267  | 11.801 | 8.957  | 8.536  | 2.04E-07 | 3.04E-01 | 4.53  | -0.42 |
| <i>lpg2532</i> | aspartate aminotransferase (PLP-dependent aminotransferase)               |             | Amino Acid Metabolism, Energy Metab     | 7.264  | 12.369 | 8.131  | 9.850  | 3.15E-05 | 2.20E-01 | 5.11  | 1.72  |
| <i>lpg2533</i> | tellurite resistance protein (hemagglutinin) <i>tehB</i>                  |             | Transport and binding, Toxin productio  | 9.196  | 10.638 | 9.126  | 10.561 | 5.46E-03 | 5.02E-02 | 1.44  | 1.43  |
| <i>lpg2533</i> | tellurite resistance protein (hemagglutinin) <i>tehB</i>                  |             | Transport and binding, Toxin productio  | 8.916  | 10.843 | 8.828  | 10.379 | 5.80E-04 | 1.07E-02 | 1.93  | 1.55  |
| <i>lpg2534</i> | hypothetical (iron regulator, rhizobial) (transcriptional regulator?) COC |             | Transcription factors / DNA binding prc | 7.647  | 8.597  | 8.851  | 8.361  | 5.43E-02 | 2.58E-01 | 0.95  | -0.49 |
| <i>lpg2534</i> | hypothetical (iron regulator, rhizobial) (transcriptional regulator?) COC |             | Transcription factors / DNA binding prc | 7.120  | 8.761  | 7.907  | 8.085  | 9.17E-02 | 6.26E-01 | 1.64  | 0.18  |
| <i>lpg2535</i> | limited homology to myoglobin (hemoglobin, cyanoglobin)                   |             | Unknown / hypothetical proteins         | 9.008  | 7.909  | 8.817  | 8.666  | 1.43E-01 | 6.54E-01 | -1.10 | -0.15 |
| <i>lpg2535</i> | limited homology to myoglobin (hemoglobin, cyanoglobin)                   |             | Unknown / hypothetical proteins         | 8.825  | 8.432  | 8.542  | 8.707  | 2.38E-01 | 4.42E-01 | -0.39 | 0.17  |
| <i>lpg2536</i> | ferredoxin reductase (NAD(P)H-flavin reductase) (iron-sulfur cluster b    |             | Metabolism of Cofactors and Vitamins    | 8.664  | 8.504  | 9.793  | 8.721  | 6.59E-01 | 7.83E-02 | -0.16 | -1.07 |
| <i>lpg2536</i> | ferredoxin reductase (NAD(P)H-flavin reductase) (iron-sulfur cluster b    |             | Metabolism of Cofactors and Vitamins    | 7.929  | 8.429  | 8.606  | 9.057  | 6.77E-01 | 7.03E-01 | 0.50  | 0.45  |
| <i>lpg2537</i> | 5-carboxyvanillate decarboxylase (2-amino-3-carboxylmuconate-6-se         |             | Named proteins of general function      | 9.472  | 9.386  | 11.899 | 9.447  | 8.81E-01 | 1.54E-05 | -0.09 | -2.45 |
| <i>lpg2537</i> | 5-carboxyvanillate decarboxylase (2-amino-3-carboxylmuconate-6-se         |             | Named proteins of general function      | 9.388  | 9.954  | 11.773 | 9.873  | 2.53E-01 | 2.98E-04 | 0.57  | -1.90 |
| <i>lpg2538</i> | ORF                                                                       |             | ORFs of unknown function (unique)       | 10.580 | 10.701 | 9.546  | 11.591 | 8.35E-01 | 3.84E-04 | 0.12  | 2.04  |
| <i>lpg2538</i> | ORF                                                                       |             | ORFs of unknown function (unique)       | 10.890 | 10.787 | 9.473  | 11.535 | 6.85E-01 | 1.92E-03 | -0.10 | 2.06  |
| <i>lpg2539</i> | small ORF (135aa)                                                         |             | ORFs of unknown function (unique)       | 9.788  | 8.079  | 8.867  | 7.503  | 5.11E-02 | 3.55E-01 | -1.71 | -1.36 |
| <i>lpg2539</i> | small ORF (135aa)                                                         |             | ORFs of unknown function (unique)       | 9.874  | 7.524  | 8.982  | 7.815  | 8.20E-02 | 2.04E-01 | -2.35 | -1.17 |
| <i>lpg2540</i> | large conductance mechanosensitive channel                                | <i>mscL</i> | Energy Metabolism                       | 11.246 | 11.435 | 10.022 | 11.148 | 5.30E-01 | 2.62E-02 | 0.19  | 1.13  |
| <i>lpg2540</i> | large conductance mechanosensitive channel                                | <i>mscL</i> | Energy Metabolism                       | 10.927 | 11.357 | 9.834  | 11.223 | 4.58E-01 | 2.18E-02 | 0.43  | 1.39  |
| <i>lpg2541</i> | ORF                                                                       |             | ORFs of unknown function (unique)       | 10.364 | 9.984  | 8.868  | 10.506 | 4.57E-01 | 5.32E-02 | -0.38 | 1.64  |
| <i>lpg2541</i> | ORF                                                                       |             | ORFs of unknown function (unique)       | 10.416 | 9.473  | 8.727  | 10.393 | 1.72E-01 | 2.87E-02 | -0.94 | 1.67  |
| <i>lpg2542</i> | small ORF (163aa)                                                         |             | ORFs of unknown function (unique)       | 10.931 | 10.490 | 10.532 | 10.417 | 3.04E-01 | 9.20E-01 | -0.44 | -0.12 |
| <i>lpg2542</i> | small ORF (163aa)                                                         |             | ORFs of unknown function (unique)       | 11.120 | 10.347 | 9.532  | 10.837 | 1.48E-01 | 4.76E-02 | -0.77 | 1.30  |
| <i>lpg2543</i> | ORF                                                                       |             | ORFs of unknown function (unique)       | 9.076  | 9.824  | 9.608  | 9.499  | 1.70E-01 | 9.25E-01 | 0.75  | -0.11 |
| <i>lpg2543</i> | ORF                                                                       |             | ORFs of unknown function (unique)       | 8.659  | 9.577  | 9.569  | 9.778  | 5.43E-02 | 6.94E-01 | 0.92  | 0.21  |
| <i>lpg2544</i> | membrane-bound lytic murein transglycosylase A                            | <i>mltA</i> | Cell envelope synthesis, Metabolism o   | 9.217  | 8.331  | 9.390  | 7.214  | 1.85E-02 | 1.46E-01 | -0.89 | -2.18 |
| <i>lpg2544</i> | membrane-bound lytic murein transglycosylase A                            | <i>mltA</i> | Cell envelope synthesis, Metabolism o   | 8.469  | 9.722  | 9.116  | 9.765  | 3.45E-01 | 5.74E-01 | 1.25  | 0.65  |
| <i>lpg2545</i> | small ORF (96aa)                                                          |             | ORFs of unknown function (unique)       | 10.589 | 9.479  | 11.376 | 9.009  | 3.65E-03 | 1.11E-04 | -1.11 | -2.37 |
| <i>lpg2545</i> | small ORF (96aa)                                                          |             | ORFs of unknown function (unique)       | 10.569 | 9.688  | 11.400 | 9.399  | 3.02E-02 | 1.25E-03 | -0.88 | -2.00 |
| <i>lpg2546</i> | hypothetical protein                                                      |             | Unknown / hypothetical proteins         | 10.135 | 10.198 | 10.426 | 9.046  | 9.06E-01 | 1.33E-02 | 0.06  | -1.38 |
| <i>lpg2546</i> | hypothetical protein                                                      |             | Unknown / hypothetical proteins         | 10.051 | 10.559 | 10.229 | 9.167  | 3.27E-01 | 5.14E-02 | 0.51  | -1.06 |
| <i>lpg2547</i> | chaperonin CsaA (protein secretion chaperonin)                            | <i>csaA</i> | Protein fate / hydrolases / secretion   | 10.650 | 11.143 | 10.717 | 10.109 | 1.83E-02 | 4.18E-02 | 0.49  | -0.61 |
| <i>lpg2547</i> | chaperonin CsaA (protein secretion chaperonin)                            | <i>csaA</i> | Protein fate / hydrolases / secretion   | 10.554 | 11.269 | 10.731 | 10.283 | 7.27E-04 | 7.65E-02 | 0.72  | -0.45 |

|                |                                                                        |                                                        |        |        |        |        |          |          |       |       |
|----------------|------------------------------------------------------------------------|--------------------------------------------------------|--------|--------|--------|--------|----------|----------|-------|-------|
| <i>lpg2548</i> | transmembrane protein (transporter, drug metabolite exporter family?)  | Transport and binding                                  | 11.086 | 10.906 | 10.013 | 10.448 | 6.93E-01 | 1.35E-01 | -0.18 | 0.43  |
| <i>lpg2548</i> | transmembrane protein (transporter, drug metabolite exporter family?)  | Transport and binding                                  | 11.057 | 11.078 | 9.454  | 10.910 | 9.37E-01 | 4.26E-02 | 0.02  | 1.46  |
| <i>lpg2549</i> | transcriptional regulator (AraC-family) (enhancer)                     | Transcription factors / DNA binding prc                | 10.213 | 9.027  | 9.182  | 9.120  | 1.33E-02 | 9.03E-01 | -1.19 | -0.06 |
| <i>lpg2549</i> | transcriptional regulator (AraC-family) (enhancer)                     | Transcription factors / DNA binding prc                | 9.953  | 9.167  | 9.137  | 9.393  | 3.55E-01 | 6.20E-01 | -0.79 | 0.26  |
| <i>lpg2550</i> | ORF                                                                    | ORFs of unknown function (unique)                      | 10.288 | 9.016  | 10.335 | 8.899  | 1.50E-02 | 3.39E-02 | -1.27 | -1.44 |
| <i>lpg2550</i> | ORF                                                                    | ORFs of unknown function (unique)                      | 10.219 | 9.427  | 10.516 | 9.131  | 8.07E-02 | 5.03E-02 | -0.79 | -1.39 |
| <i>lpg2551</i> | hypothetical                                                           | Unknown / hypothetical proteins                        | 9.598  | 9.243  | 9.082  | 9.372  | 5.86E-02 | 6.21E-01 | -0.36 | 0.29  |
| <i>lpg2551</i> | hypothetical                                                           | Unknown / hypothetical proteins                        | 9.395  | 9.461  | 9.536  | 9.843  | 8.94E-01 | 4.00E-01 | 0.07  | 0.31  |
| <i>lpg2552</i> | ORF                                                                    | ORFs of unknown function (unique)                      | 12.194 | 12.082 | 10.706 | 12.877 | 8.50E-01 | 2.54E-03 | -0.11 | 2.17  |
| <i>lpg2552</i> | ORF                                                                    | ORFs of unknown function (unique)                      | 11.231 | 10.192 | 9.306  | 11.640 | 5.19E-03 | 3.16E-02 | -1.04 | 2.33  |
| <i>lpg2553</i> | hexosephosphate transport (sugar phosphate sensor pro <i>uhpC</i> )    | Transport and binding                                  | 11.634 | 10.927 | 11.585 | 11.378 | 2.96E-02 | 7.52E-01 | -0.71 | -0.21 |
| <i>lpg2553</i> | hexosephosphate transport (sugar phosphate sensor pro <i>uhpC</i> )    | Transport and binding                                  | 11.682 | 10.936 | 11.642 | 11.838 | 2.10E-03 | 3.12E-01 | -0.75 | 0.20  |
| <i>lpg2554</i> | rare lipoprotein A                                                     | Named proteins of general function                     | 11.797 | 11.815 | 9.941  | 11.402 | 9.83E-01 | 5.23E-02 | 0.02  | 1.46  |
| <i>lpg2554</i> | rare lipoprotein A                                                     | Named proteins of general function                     | 11.566 | 11.765 | 9.891  | 11.517 | 8.41E-01 | 2.48E-02 | 0.20  | 1.63  |
| <i>lpg2555</i> | ORF                                                                    | ORFs of unknown function (unique)                      | 10.318 | 8.758  | 9.956  | 8.735  | 3.84E-02 | 2.94E-02 | -1.56 | -1.22 |
| <i>lpg2555</i> | ORF                                                                    | ORFs of unknown function (unique)                      | 10.003 | 9.226  | 9.671  | 8.645  | 1.55E-01 | 1.19E-01 | -0.78 | -1.03 |
| <i>lpg2556</i> | putative protein kinase                                                | <i>legK3</i><br>Viral functions / Phage / Transposases | 10.751 | 9.984  | 10.396 | 10.616 | 1.13E-01 | 5.15E-01 | -0.77 | 0.22  |
| <i>lpg2556</i> | putative protein kinase                                                | <i>legK3</i><br>Viral functions / Phage / Transposases | 10.867 | 10.231 | 10.329 | 10.651 | 2.72E-02 | 2.84E-01 | -0.64 | 0.32  |
| <i>lpg2557</i> | protein product; similar to probable transcriptional regulator         | Unknown / hypothetical proteins                        | 7.529  | 8.997  | 9.391  | 8.321  | 2.09E-01 | 3.52E-01 | 1.47  | -1.07 |
| <i>lpg2557</i> | protein product; similar to probable transcriptional regulator         | Unknown / hypothetical proteins                        | 8.352  | 8.083  | 8.002  | 8.297  | 8.80E-01 | 7.91E-01 | -0.27 | 0.29  |
| <i>lpg2558</i> | integrase of prophage CP-933C                                          | Viral functions / Phage / Transposases                 | 8.606  | 8.084  | 8.645  | 8.115  | 7.50E-01 | 6.25E-01 | -0.52 | -0.53 |
| <i>lpg2558</i> | integrase of prophage CP-933C                                          | Viral functions / Phage / Transposases                 | 9.935  | 9.808  | 9.365  | 9.949  | 8.83E-01 | 6.29E-01 | -0.13 | 0.58  |
| <i>lpg2559</i> | ATP-dependent DNA helicase                                             | <i>recG</i><br>Replication and Repair                  | 10.418 | 7.946  | 9.463  | 8.862  | 8.68E-04 | 1.98E-01 | -2.47 | -0.60 |
| <i>lpg2559</i> | ATP-dependent DNA helicase                                             | <i>recG</i><br>Replication and Repair                  | 10.528 | 8.124  | 9.349  | 9.209  | 3.08E-02 | 8.67E-01 | -2.40 | -0.14 |
| <i>lpg2560</i> | unknown protein                                                        | Unknown / hypothetical proteins                        | 11.334 | 11.160 | 11.532 | 10.652 | 5.60E-01 | 9.70E-03 | -0.17 | -0.88 |
| <i>lpg2560</i> | unknown protein                                                        | Unknown / hypothetical proteins                        | 11.357 | 11.628 | 11.514 | 11.071 | 5.69E-01 | 2.55E-01 | 0.27  | -0.44 |
| <i>lpg2561</i> | hypothetical protein                                                   | Unknown / hypothetical proteins                        | 9.663  | 9.018  | 10.836 | 9.220  | 1.77E-01 | 2.18E-02 | -0.64 | -1.62 |
| <i>lpg2561</i> | hypothetical protein                                                   | Unknown / hypothetical proteins                        | 9.643  | 7.943  | 10.785 | 9.220  | 6.36E-02 | 3.76E-02 | -1.70 | -1.57 |
| <i>lpg2562</i> | phage repressor                                                        | Transcription factors / DNA binding prc                | 8.894  | 9.162  | 8.318  | 7.860  | 6.63E-01 | 3.58E-01 | 0.27  | -0.46 |
| <i>lpg2562</i> | phage repressor                                                        | Transcription factors / DNA binding prc                | 9.249  | 8.692  | 8.060  | 8.869  | 4.41E-01 | 1.54E-01 | -0.56 | 0.81  |
| <i>lpg2563</i> | prophage regulatory protein?                                           | Viral functions / Phage / Transposases                 | 11.086 | 9.867  | 10.164 | 11.737 | 7.19E-02 | 1.51E-03 | -1.22 | 1.57  |
| <i>lpg2563</i> | prophage regulatory protein?                                           | Viral functions / Phage / Transposases                 | 10.771 | 10.426 | 10.185 | 12.010 | 6.90E-01 | 1.24E-03 | -0.35 | 1.83  |
| <i>lpg2564</i> | LvrA                                                                   | Transport and binding, Toxin productio                 | 8.592  | 10.357 | 8.685  | 8.958  | 2.34E-03 | 7.95E-01 | 1.77  | 0.27  |
| <i>lpg2564</i> | LvrA                                                                   | Transport and binding, Toxin productio                 | 8.538  | 9.880  | 8.600  | 9.173  | 2.14E-02 | 4.76E-01 | 1.34  | 0.57  |
| <i>lpg2565</i> | transposase ORF-A (IS-type)                                            | Viral functions / Phage / Transposases                 | 9.729  | 11.243 | 9.818  | 11.304 | 9.15E-04 | 7.37E-04 | 1.51  | 1.49  |
| <i>lpg2565</i> | transposase ORF-A (IS-type)                                            | Viral functions / Phage / Transposases                 | 9.046  | 11.148 | 9.633  | 11.352 | 7.81E-03 | 7.00E-03 | 2.10  | 1.72  |
| <i>lpg2566</i> | ISxcC1 transposase                                                     | Viral functions / Phage / Transposases                 | 10.980 | 11.039 | 11.990 | 10.896 | 9.31E-01 | 3.39E-02 | 0.06  | -1.09 |
| <i>lpg2566</i> | ISxcC1 transposase                                                     | Viral functions / Phage / Transposases                 | 10.933 | 11.500 | 11.803 | 11.536 | 2.46E-02 | 3.25E-01 | 0.57  | -0.27 |
| <i>lpg2567</i> | ISI400 transposase B                                                   | Viral functions / Phage / Transposases                 | 8.753  | 8.996  | 8.593  | 9.205  | 3.23E-01 | 1.78E-01 | 0.24  | 0.61  |
| <i>lpg2567</i> | ISI400 transposase B                                                   | Viral functions / Phage / Transposases                 | 8.058  | 8.010  | 8.213  | 9.052  | 9.64E-01 | 1.29E-01 | -0.05 | 0.84  |
| <i>lpg2568</i> | hypothetical                                                           | Unknown / hypothetical proteins                        | 10.100 | 10.875 | 11.227 | 9.140  | 1.02E-01 | 3.90E-03 | 0.77  | -2.09 |
| <i>lpg2568</i> | hypothetical                                                           | Unknown / hypothetical proteins                        | 10.116 | 10.799 | 11.344 | 9.332  | 1.03E-01 | 3.62E-03 | 0.68  | -2.01 |
| <i>lpg2569</i> | ORF transcription regulator? fatty acid phospholipid synthesis protein | Unknown / hypothetical proteins                        | 8.917  | 10.381 | 10.392 | 8.115  | 2.41E-02 | 1.76E-02 | 1.46  | -2.28 |
| <i>lpg2569</i> | ORF transcription regulator? fatty acid phospholipid synthesis protein | Unknown / hypothetical proteins                        | 9.180  | 10.402 | 10.500 | 8.745  | 6.48E-02 | 2.04E-02 | 1.22  | -1.76 |
| <i>lpg2570</i> | transposase (invertase, resolvase) COG1961, putative pseudogene        | Viral functions / Phage / Transposases                 | 9.074  | 8.308  | 9.371  | 8.135  | 5.25E-03 | 3.08E-02 | -0.77 | -1.24 |
| <i>lpg2570</i> | transposase (invertase, resolvase) COG1961, putative pseudogene        | Viral functions / Phage / Transposases                 | 9.006  | 9.405  | 9.324  | 8.538  | 3.85E-01 | 1.23E-01 | 0.40  | -0.79 |
| <i>lpg2571</i> | ORF                                                                    | ORFs of unknown function (unique)                      | 11.205 | 10.762 | 9.880  | 10.451 | 1.18E-01 | 3.11E-01 | -0.44 | 0.57  |
| <i>lpg2571</i> | ORF                                                                    | ORFs of unknown function (unique)                      | 11.263 | 10.457 | 9.520  | 10.513 | 2.13E-02 | 1.62E-01 | -0.81 | 0.99  |
| <i>lpg2572</i> | ORF                                                                    | ORFs of unknown function (unique)                      | 9.872  | 7.736  | 9.660  | 6.699  | 3.19E-02 | 2.88E-03 | -2.14 | -2.96 |
| <i>lpg2572</i> | ORF                                                                    | ORFs of unknown function (unique)                      | 9.818  | 7.564  | 9.796  | 7.892  | 7.62E-03 | 9.30E-03 | -2.25 | -1.90 |
| <i>lpg2573</i> | transposase (resolvase, DNA invertase) (resolvase/integrase)           | Viral functions / Phage / Transposases                 | 10.620 | 8.988  | 9.651  | 7.601  | 1.70E-01 | 8.62E-02 | -1.63 | -2.05 |
| <i>lpg2573</i> | transposase (resolvase, DNA invertase) (resolvase/integrase)           | Viral functions / Phage / Transposases                 | 9.458  | 8.473  | 8.802  | 7.209  | 1.25E-01 | 3.48E-02 | -0.99 | -1.59 |
| <i>lpg2574</i> | conserved hypothetical protein                                         | Unknown / hypothetical proteins                        | 9.035  | 9.449  | 8.029  | 7.683  | 4.42E-01 | 8.79E-01 | 0.41  | -0.35 |
| <i>lpg2574</i> | conserved hypothetical protein                                         | Unknown / hypothetical proteins                        | 8.445  | 9.157  | 6.429  | 8.579  | 4.63E-01 | 1.29E-01 | 0.71  | 2.15  |
| <i>lpg2575</i> | tRNA-Pro                                                               | tRNA                                                   | 11.629 | 10.354 | 11.611 | 10.206 | 1.90E-03 | 1.37E-02 | -1.28 | -1.40 |
| <i>lpg2575</i> | tRNA-Pro                                                               | tRNA                                                   | 11.584 | 10.605 | 11.612 | 10.379 | 1.42E-02 | 4.91E-02 | -0.98 | -1.23 |
| <i>lpg2576</i> | uroporphyrin-III C-methyltransferase?                                  | Named proteins of general function                     | 11.968 | 9.737  | 11.398 | 10.203 | 2.46E-03 | 2.34E-02 | -2.23 | -1.20 |
| <i>lpg2576</i> | uroporphyrin-III C-methyltransferase?                                  | Named proteins of general function                     | 12.086 | 9.754  | 11.560 | 10.423 | 2.65E-03 | 1.56E-02 | -2.33 | -1.14 |
| <i>lpg2577</i> | ORF                                                                    | ORFs of unknown function (unique)                      | 14.363 | 14.132 | 13.276 | 14.278 | 7.80E-01 | 3.74E-01 | -0.23 | 1.00  |
| <i>lpg2577</i> | ORF                                                                    | ORFs of unknown function (unique)                      | 14.497 | 14.880 | 13.273 | 15.234 | 2.48E-01 | 4.70E-04 | 0.38  | 1.96  |
| <i>lpg2578</i> | hypothetical? (84aa ORF)                                               | Unknown / hypothetical proteins                        | 12.606 | 11.547 | 13.729 | 11.319 | 3.27E-03 | 7.21E-06 | -1.06 | -2.41 |
| <i>lpg2578</i> | hypothetical? (84aa ORF)                                               | Unknown / hypothetical proteins                        | 12.601 | 11.473 | 13.712 | 11.596 | 2.44E-03 | 1.45E-05 | -1.13 | -2.12 |
| <i>lpg2579</i> | small ORF (137aa)                                                      | ORFs of unknown function (unique)                      | 8.758  | 9.605  | 9.323  | 8.117  | 1.25E-01 | 3.92E-02 | 0.85  | -1.21 |
| <i>lpg2579</i> | small ORF (137aa)                                                      | ORFs of unknown function (unique)                      | 9.465  | 9.869  | 9.479  | 9.015  | 1.96E-01 | 1.52E-01 | 0.40  | -0.46 |



|                |                                                                                 |              |                                                                              |        |        |        |        |          |          |       |       |
|----------------|---------------------------------------------------------------------------------|--------------|------------------------------------------------------------------------------|--------|--------|--------|--------|----------|----------|-------|-------|
| <i>lpg2580</i> | glutaryl CoA dehydrogenase                                                      | <i>gcdH</i>  | Lipid Metabolism, Amino Acid Metabolism                                      | 13.568 | 12.861 | 11.229 | 12.080 | 4.51E-01 | 1.22E-01 | -0.71 | 0.85  |
| <i>lpg2580</i> | glutaryl CoA dehydrogenase                                                      | <i>gcdH</i>  | Lipid Metabolism, Amino Acid Metabolism                                      | 13.759 | 12.912 | 11.146 | 12.048 | 1.73E-01 | 1.18E-01 | -0.85 | 0.90  |
| <i>lpg2581</i> | 2-oxoisovalerate dehydrogenase, E1 component, alpha and beta fused              |              | Amino Acid Metabolism                                                        | 11.375 | 11.491 | 10.592 | 11.426 | 7.62E-01 | 9.15E-02 | 0.12  | 0.83  |
| <i>lpg2581</i> | 2-oxoisovalerate dehydrogenase, E1 component, alpha and beta fused              |              | Amino Acid Metabolism                                                        | 11.294 | 11.582 | 10.308 | 11.532 | 4.50E-01 | 4.63E-02 | 0.29  | 1.22  |
| <i>lpg2582</i> | conserved hypothetical protein                                                  |              | Unknown / hypothetical proteins                                              | 9.013  | 7.792  | 10.787 | 8.488  | 1.50E-01 | 3.56E-03 | -1.22 | -2.30 |
| <i>lpg2582</i> | conserved hypothetical protein                                                  |              | Unknown / hypothetical proteins                                              | 10.208 | 12.142 | 10.805 | 12.182 | 7.33E-02 | 1.74E-01 | 1.93  | 1.38  |
| <i>lpg2583</i> | flagellar protein FlhB                                                          |              | Chemotaxis / motility / cell division                                        | 7.865  | 9.022  | 11.502 | 8.534  | 3.33E-01 | 3.73E-02 | 1.16  | -2.97 |
| <i>lpg2583</i> | flagellar protein FlhB                                                          |              | Chemotaxis / motility / cell division                                        | 8.050  | 8.687  | 11.425 | 8.658  | 4.53E-01 | 1.34E-02 | 0.64  | -2.77 |
| <i>lpg2584</i> | SidF, inhibitor of growth family, member 3                                      | <i>sidF</i>  | Chemotaxis / motility / cell division, Signaling                             | 10.304 | 9.678  | 12.230 | 10.738 | 3.37E-01 | 1.62E-02 | -0.63 | -1.49 |
| <i>lpg2584</i> | SidF, inhibitor of growth family, member 3                                      | <i>sidF</i>  | Chemotaxis / motility / cell division, Signaling                             | 10.283 | 9.676  | 12.123 | 10.902 | 3.47E-01 | 2.17E-02 | -0.61 | -1.22 |
| <i>lpg2585</i> | D-alanyl-D-alanine dipeptidase                                                  | <i>pcgL</i>  | Protein fate / hydrolases / secretion                                        | 9.554  | 7.670  | 8.846  | 8.313  | 9.67E-02 | 1.64E-01 | -1.88 | -0.53 |
| <i>lpg2585</i> | D-alanyl-D-alanine dipeptidase                                                  | <i>pcgL</i>  | Protein fate / hydrolases / secretion                                        | 9.665  | 8.808  | 8.931  | 8.638  | 3.49E-02 | 4.30E-01 | -0.86 | -0.29 |
| <i>lpg2586</i> | cysteine protease (papain C1 family)                                            |              | Protein fate / hydrolases / secretion                                        | 9.809  | 12.206 | 11.207 | 10.917 | 2.04E-07 | 4.84E-01 | 2.40  | -0.29 |
| <i>lpg2586</i> | cysteine protease (papain C1 family)                                            |              | Protein fate / hydrolases / secretion                                        | 9.810  | 12.190 | 11.224 | 10.996 | 1.53E-08 | 5.26E-01 | 2.38  | -0.23 |
| <i>lpg2587</i> | probable thermolabile hemolysin                                                 |              | Toxin production / other pathogen functions                                  | 9.937  | 10.985 | 12.143 | 9.002  | 7.86E-02 | 2.42E-05 | 1.05  | -3.14 |
| <i>lpg2587</i> | probable thermolabile hemolysin                                                 |              | Toxin production / other pathogen functions                                  | 10.141 | 11.126 | 12.156 | 9.157  | 4.43E-02 | 6.10E-05 | 0.98  | -3.00 |
| <i>lpg2588</i> | acid sphingomyelinase-like phosphodiesterase                                    | <i>legS1</i> | DNA/RNA degradation / restriction                                            | 11.526 | 11.223 | 12.286 | 10.829 | 3.40E-01 | 5.26E-03 | -0.30 | -1.46 |
| <i>lpg2588</i> | acid sphingomyelinase-like phosphodiesterase                                    | <i>legS1</i> | DNA/RNA degradation / restriction                                            | 11.637 | 11.265 | 12.138 | 10.857 | 2.53E-01 | 2.55E-03 | -0.37 | -1.28 |
| <i>lpg2589</i> | D-alanyl-D-alanine carboxypeptidase, fraction B; penicillinase                  | <i>dacB</i>  | Cell envelope synthesis, Protein fate / secretion                            | 11.228 | 10.507 | 10.305 | 11.391 | 3.16E-01 | 2.47E-01 | -0.72 | 1.09  |
| <i>lpg2589</i> | D-alanyl-D-alanine carboxypeptidase, fraction B; penicillinase                  | <i>dacB</i>  | Cell envelope synthesis, Protein fate / secretion                            | 11.103 | 11.034 | 9.674  | 12.130 | 8.80E-01 | 1.13E-03 | -0.07 | 2.46  |
| <i>lpg2590</i> | chromosome partitioning protein ParB (Spo0J)                                    | <i>spo0J</i> | Chemotaxis / motility / cell division                                        | 9.260  | 9.607  | 9.175  | 9.446  | 6.47E-01 | 8.51E-01 | 0.35  | 0.27  |
| <i>lpg2590</i> | chromosome partitioning protein ParB (Spo0J)                                    | <i>spo0J</i> | Chemotaxis / motility / cell division                                        | 9.033  | 8.659  | 8.417  | 9.633  | 3.37E-01 | 1.14E-01 | -0.37 | 1.22  |
| <i>lpg2591</i> | small ORF (165aa)                                                               | <i>ceg33</i> | ORFs of unknown function (unique)                                            | 10.063 | 9.535  | 10.543 | 9.195  | 2.08E-01 | 2.39E-02 | -0.53 | -1.35 |
| <i>lpg2591</i> | small ORF (165aa)                                                               | <i>ceg33</i> | ORFs of unknown function (unique)                                            | 9.990  | 9.454  | 10.252 | 8.914  | 2.60E-01 | 5.30E-03 | -0.54 | -1.34 |
| <i>lpg2592</i> | conserved hypothetical protein                                                  |              | Unknown / hypothetical proteins                                              | 11.812 | 10.660 | 12.314 | 10.742 | 1.97E-03 | 3.27E-02 | -1.15 | -1.57 |
| <i>lpg2592</i> | conserved hypothetical protein                                                  |              | Unknown / hypothetical proteins                                              | 11.872 | 10.814 | 12.442 | 11.109 | 3.23E-04 | 2.19E-03 | -1.06 | -1.33 |
| <i>lpg2593</i> | rRNA methyltransferase (SUN protein)                                            |              | DNA/RNA degradation / restriction, Transcription, Replication and Repair     | 11.339 | 9.052  | 10.542 | 10.659 | 1.03E-03 | 7.62E-01 | -2.29 | 0.12  |
| <i>lpg2593</i> | rRNA methyltransferase (SUN protein)                                            |              | DNA/RNA degradation / restriction, Transcription, Replication and Repair     | 11.404 | 9.619  | 10.449 | 10.967 | 1.94E-06 | 3.52E-01 | -1.79 | 0.52  |
| <i>lpg2594</i> | methionyl tRNA formyltransferase                                                | <i>fmt</i>   | Amino Acid Metabolism, Metabolism of other molecules                         | 11.164 | 10.565 | 9.441  | 11.277 | 2.54E-01 | 8.71E-02 | -0.60 | 1.84  |
| <i>lpg2594</i> | methionyl tRNA formyltransferase                                                | <i>fmt</i>   | Amino Acid Metabolism, Metabolism of other molecules                         | 11.597 | 10.184 | 9.489  | 11.946 | 4.22E-03 | 4.38E-03 | -1.41 | 2.46  |
| <i>lpg2595</i> | peptide deformylase (polypeptide deformylase)                                   | <i>def</i>   | Protein fate / hydrolases / secretion, Transcription, Replication and Repair | 12.197 | 12.042 | 11.109 | 12.769 | 7.38E-01 | 3.62E-04 | -0.16 | 1.66  |
| <i>lpg2595</i> | peptide deformylase (polypeptide deformylase)                                   | <i>def</i>   | Protein fate / hydrolases / secretion, Transcription, Replication and Repair | 12.275 | 12.271 | 11.174 | 12.990 | 9.93E-01 | 3.62E-05 | 0.00  | 1.82  |
| <i>lpg2596</i> | signal peptide protein (LysM domain protein)                                    |              | Named proteins of general function                                           | 9.844  | 10.347 | 9.679  | 10.840 | 2.75E-01 | 1.37E-02 | 0.50  | 1.16  |
| <i>lpg2596</i> | signal peptide protein (LysM domain protein)                                    |              | Named proteins of general function                                           | 9.726  | 10.569 | 9.638  | 10.911 | 4.34E-02 | 2.09E-03 | 0.84  | 1.27  |
| <i>lpg2597</i> | DNA processing enzyme DprA (SMF family) (Rossman fold nucleotidyl transferase)  |              | DNA/RNA degradation / restriction                                            | 10.312 | 9.092  | 11.430 | 8.930  | 1.49E-03 | 6.38E-04 | -1.22 | -2.50 |
| <i>lpg2597</i> | DNA processing enzyme DprA (SMF family) (Rossman fold nucleotidyl transferase)  |              | DNA/RNA degradation / restriction                                            | 10.117 | 9.035  | 11.516 | 9.591  | 2.12E-03 | 3.29E-04 | -1.08 | -1.92 |
| <i>lpg2598</i> | small ORF (138aa)                                                               |              | ORFs of unknown function (unique)                                            | 11.387 | 11.478 | 10.369 | 12.728 | 8.64E-01 | 3.71E-03 | 0.09  | 2.36  |
| <i>lpg2598</i> | small ORF (138aa)                                                               |              | ORFs of unknown function (unique)                                            | 11.220 | 11.440 | 10.321 | 12.871 | 7.17E-01 | 1.70E-04 | 0.22  | 2.55  |
| <i>lpg2599</i> | DNA topoisomerase I                                                             | <i>topA</i>  | Transcription, Replication and Repair                                        | 10.752 | 9.867  | 11.106 | 12.015 | 1.54E-03 | 7.43E-03 | -0.88 | 0.91  |
| <i>lpg2599</i> | DNA topoisomerase I                                                             | <i>topA</i>  | Transcription, Replication and Repair                                        | 10.868 | 9.847  | 11.043 | 11.972 | 4.39E-04 | 1.13E-02 | -1.02 | 0.93  |
| <i>lpg2600</i> | acyltransferase (O-antigen acetylase, lipopolysaccharide biosynthesis)          |              | Toxin production / other pathogen functions                                  | 9.790  | 9.276  | 8.639  | 8.748  | 3.20E-01 | 8.42E-01 | -0.51 | 0.11  |
| <i>lpg2600</i> | acyltransferase (O-antigen acetylase, lipopolysaccharide biosynthesis)          |              | Toxin production / other pathogen functions                                  | 9.723  | 8.943  | 8.396  | 9.239  | 2.18E-01 | 5.51E-02 | -0.78 | 0.84  |
| <i>lpg2601</i> | conserved hypothetical protein                                                  |              | Unknown / hypothetical proteins                                              | 13.233 | 12.805 | 12.399 | 12.243 | 1.83E-01 | 5.69E-01 | -0.43 | -0.16 |
| <i>lpg2601</i> | conserved hypothetical protein                                                  |              | Unknown / hypothetical proteins                                              | 13.261 | 12.756 | 12.318 | 12.258 | 1.61E-01 | 8.35E-01 | -0.50 | -0.06 |
| <i>lpg2602</i> | conserved domain protein                                                        |              | Unknown / hypothetical proteins                                              | 10.406 | 10.061 | 11.078 | 9.652  | 4.70E-01 | 4.14E-03 | -0.34 | -1.43 |
| <i>lpg2602</i> | conserved domain protein                                                        |              | Unknown / hypothetical proteins                                              | 10.241 | 9.620  | 10.672 | 9.722  | 2.09E-01 | 8.53E-02 | -0.62 | -0.95 |
| <i>lpg2603</i> | ORF                                                                             |              | ORFs of unknown function (unique)                                            | 10.192 | 11.167 | 13.635 | 9.229  | 2.45E-01 | 2.79E-04 | 0.98  | -4.41 |
| <i>lpg2603</i> | ORF                                                                             |              | ORFs of unknown function (unique)                                            | 10.136 | 11.201 | 13.586 | 9.615  | 2.01E-01 | 9.50E-04 | 1.07  | -3.97 |
| <i>lpg2604</i> | hypothetical (membrane protein) (temperature sensitive suppressor of virulence) |              | Named proteins of general function                                           | 10.444 | 10.384 | 11.055 | 10.588 | 8.76E-01 | 8.26E-02 | -0.06 | -0.47 |
| <i>lpg2604</i> | hypothetical (membrane protein) (temperature sensitive suppressor of virulence) |              | Named proteins of general function                                           | 10.504 | 10.641 | 11.042 | 10.895 | 7.31E-01 | 6.17E-01 | 0.14  | -0.15 |
| <i>lpg2605</i> | conserved hypothetical protein                                                  |              | Unknown / hypothetical proteins                                              | 10.533 | 9.361  | 11.087 | 8.812  | 9.39E-03 | 3.32E-03 | -1.17 | -2.27 |
| <i>lpg2605</i> | conserved hypothetical protein                                                  |              | Unknown / hypothetical proteins                                              | 10.463 | 9.258  | 11.069 | 9.240  | 5.39E-03 | 3.61E-03 | -1.20 | -1.83 |
| <i>lpg2606</i> | glutamine amidotransferase                                                      |              | Amino Acid Metabolism                                                        | 10.479 | 10.224 | 12.079 | 9.842  | 7.22E-01 | 5.60E-04 | -0.25 | -2.24 |
| <i>lpg2606</i> | glutamine amidotransferase                                                      |              | Amino Acid Metabolism                                                        | 10.406 | 9.727  | 12.037 | 10.072 | 3.74E-01 | 2.07E-03 | -0.68 | -1.97 |
| <i>lpg2607</i> | metallopeptidase PepO, peptidase, M13 family (endothelium derived)              | <i>pepO</i>  | Protein fate / hydrolases / secretion                                        | 10.027 | 10.155 | 11.362 | 9.830  | 7.73E-01 | 3.29E-03 | 0.13  | -1.53 |
| <i>lpg2607</i> | metallopeptidase PepO, peptidase, M13 family (endothelium derived)              | <i>pepO</i>  | Protein fate / hydrolases / secretion                                        | 10.223 | 10.769 | 11.429 | 10.567 | 2.24E-01 | 1.04E-01 | 0.55  | -0.86 |
| <i>lpg2608</i> | UDP-3-O-acetyl-N-acetylglucosamine deacetylase                                  | <i>lpxC</i>  | Metabolism of Complex Carbohydrate: Lipopolysaccharide                       | 13.449 | 12.033 | 11.730 | 12.410 | 8.06E-03 | 1.11E-01 | -1.42 | 0.68  |
| <i>lpg2608</i> | UDP-3-O-acetyl-N-acetylglucosamine deacetylase                                  | <i>lpxC</i>  | Metabolism of Complex Carbohydrate: Lipopolysaccharide                       | 13.480 | 12.023 | 11.697 | 12.425 | 3.66E-03 | 8.80E-02 | -1.46 | 0.73  |
| <i>lpg2609</i> | cell division protein FtsZ                                                      | <i>ftsZ</i>  | Chemotaxis / motility / cell division                                        | 13.473 | 14.393 | 13.410 | 13.820 | 1.02E-02 | 5.21E-02 | 0.92  | 0.41  |
| <i>lpg2609</i> | cell division protein FtsZ                                                      | <i>ftsZ</i>  | Chemotaxis / motility / cell division                                        | 13.106 | 14.526 | 13.081 | 14.040 | 2.25E-02 | 6.73E-02 | 1.42  | 0.96  |
| <i>lpg2610</i> | cell division protein FtsA                                                      | <i>ftsA</i>  | Chemotaxis / motility / cell division                                        | 13.215 | 12.715 | 12.193 | 12.784 | 3.32E-02 | 2.70E-02 | -0.50 | 0.59  |
| <i>lpg2610</i> | cell division protein FtsA                                                      | <i>ftsA</i>  | Chemotaxis / motility / cell division                                        | 13.087 | 12.712 | 12.166 | 12.791 | 1.61E-01 | 1.05E-02 | -0.37 | 0.62  |
| <i>lpg2611</i> | cell division protein FtsQ                                                      | <i>ftsQ</i>  | Chemotaxis / motility / cell division                                        | 12.584 | 11.509 | 12.155 | 11.071 | 1.77E-03 | 4.23E-05 | -1.08 | -1.08 |
| <i>lpg2611</i> | cell division protein FtsQ                                                      | <i>ftsQ</i>  | Chemotaxis / motility / cell division                                        | 12.628 | 11.357 | 12.254 | 11.872 | 5.45E-05 | 1.29E-01 | -1.27 | -0.38 |

|                |                                                                  |             |                                          |        |        |        |        |          |          |       |       |
|----------------|------------------------------------------------------------------|-------------|------------------------------------------|--------|--------|--------|--------|----------|----------|-------|-------|
| <i>lpg2612</i> | D-alanine-D-alanine ligase A (DdlA)                              | <i>ddlA</i> | Metabolism of Other Amino Acids, Met     | 11.425 | 11.033 | 11.713 | 10.806 | 1.76E-01 | 1.53E-03 | -0.39 | -0.91 |
| <i>lpg2612</i> | D-alanine-D-alanine ligase A (DdlA)                              | <i>ddlA</i> | Metabolism of Other Amino Acids, Met     | 11.786 | 11.117 | 11.705 | 10.852 | 2.38E-01 | 2.78E-05 | -0.67 | -0.85 |
| <i>lpg2613</i> | UDP-N-acetylenolpyruvoylglucosamine reductase                    | <i>murB</i> | Metabolism of Complex Carbohydrate:      | 11.694 | 10.918 | 12.445 | 11.344 | 9.19E-04 | 1.33E-04 | -0.78 | -1.10 |
| <i>lpg2613</i> | UDP-N-acetylenolpyruvoylglucosamine reductase                    | <i>murB</i> | Metabolism of Complex Carbohydrate:      | 11.597 | 11.498 | 12.445 | 11.554 | 8.76E-01 | 1.30E-01 | -0.10 | -0.89 |
| <i>lpg2614</i> | UDP-N-acetylmuramate:L-alanine ligase MurC (L-alanine MurC       | <i>murC</i> | Metabolism of Other Amino Acids, Met     | 10.996 | 11.859 | 10.065 | 11.604 | 2.69E-01 | 8.95E-03 | 0.86  | 1.54  |
| <i>lpg2614</i> | UDP-N-acetylmuramate:L-alanine ligase MurC (L-alanine MurC       | <i>murC</i> | Metabolism of Other Amino Acids, Met     | 11.481 | 11.754 | 10.084 | 11.668 | 5.87E-01 | 8.98E-03 | 0.27  | 1.58  |
| <i>lpg2615</i> | cell division protein FtsW                                       | <i>ftsW</i> | Chemotaxis / motility / cell division    | 11.858 | 11.179 | 11.996 | 11.624 | 6.69E-04 | 4.69E-02 | -0.68 | -0.37 |
| <i>lpg2615</i> | cell division protein FtsW                                       | <i>ftsW</i> | Chemotaxis / motility / cell division    | 11.743 | 11.168 | 11.902 | 11.532 | 5.08E-03 | 2.38E-01 | -0.58 | -0.37 |
| <i>lpg2616</i> | UDP-N-muramoylalanine-D-glutamate ligase                         | <i>murD</i> | Metabolism of Other Amino Acids, Met     | 10.681 | 10.283 | 11.605 | 10.447 | 4.79E-01 | 7.22E-02 | -0.40 | -1.16 |
| <i>lpg2616</i> | UDP-N-muramoylalanine-D-glutamate ligase                         | <i>murD</i> | Metabolism of Other Amino Acids, Met     | 10.735 | 10.967 | 11.665 | 11.491 | 4.91E-01 | 5.42E-01 | 0.23  | -0.17 |
| <i>lpg2617</i> | phospho-N-acetylmuramoyl-pentapeptide transferase                | <i>mraY</i> | Metabolism of Complex Carbohydrate:      | 11.445 | 11.157 | 10.787 | 11.140 | 3.38E-01 | 2.71E-01 | -0.29 | 0.35  |
| <i>lpg2617</i> | phospho-N-acetylmuramoyl-pentapeptide transferase                | <i>mraY</i> | Metabolism of Complex Carbohydrate:      | 11.239 | 11.078 | 10.399 | 11.192 | 7.50E-01 | 7.23E-02 | -0.16 | 0.79  |
| <i>lpg2618</i> | UDP-N-acetylmuramoylalanine-D-glutamyl-2, 6-diaminopir           | <i>murF</i> | Amino Acid Metabolism, Metabolism o      | 11.934 | 11.633 | 10.697 | 12.417 | 2.87E-01 | 1.60E-03 | -0.30 | 1.72  |
| <i>lpg2618</i> | UDP-N-acetylmuramoylalanine-D-glutamyl-2, 6-diaminopir           | <i>murF</i> | Amino Acid Metabolism, Metabolism o      | 11.695 | 11.975 | 10.267 | 12.914 | 6.92E-01 | 2.18E-03 | 0.28  | 2.65  |
| <i>lpg2619</i> | cell division protein ZipA                                       |             | Chemotaxis / motility / cell division    | 12.235 | 11.033 | 11.877 | 11.041 | 1.20E-01 | 2.42E-01 | -1.20 | -0.84 |
| <i>lpg2619</i> | cell division protein ZipA                                       |             | Chemotaxis / motility / cell division    | 12.254 | 11.418 | 11.945 | 11.770 | 3.98E-02 | 2.24E-01 | -0.84 | -0.18 |
| <i>lpg2620</i> | chromosome segregation SMC protein (chromosome partition protein |             | Chemotaxis / motility / cell division    | 11.055 | 9.425  | 9.119  | 10.347 | 3.27E-02 | 1.09E-01 | -0.63 | 1.23  |
| <i>lpg2620</i> | chromosome segregation SMC protein (chromosome partition protein |             | Chemotaxis / motility / cell division    | 10.937 | 9.930  | 9.466  | 11.098 | 1.81E-01 | 3.85E-02 | -1.01 | 1.63  |
| <i>lpg2621</i> | acid phosphatase, class B (vegetative storage protein)           |             | Toxin production / other pathogen func   | 10.118 | 12.403 | 8.887  | 11.184 | 3.12E-04 | 8.29E-03 | 2.29  | 2.30  |
| <i>lpg2621</i> | acid phosphatase, class B (vegetative storage protein)           |             | Toxin production / other pathogen func   | 10.277 | 12.254 | 8.990  | 11.579 | 3.16E-05 | 2.30E-03 | 1.98  | 2.59  |
| <i>lpg2622</i> | hypothetical protein                                             |             | Unknown / hypothetical proteins          | 11.063 | 11.834 | 11.998 | 10.717 | 5.54E-02 | 2.39E-03 | 0.77  | -1.28 |
| <i>lpg2622</i> | hypothetical protein                                             |             | Unknown / hypothetical proteins          | 11.142 | 12.117 | 11.956 | 10.712 | 1.43E-03 | 2.89E-04 | 0.97  | -1.24 |
| <i>lpg2623</i> | transmembrane protein                                            |             | Unknown / hypothetical proteins          | 8.911  | 9.715  | 9.200  | 10.082 | 1.59E-01 | 5.05E-02 | 0.80  | 0.88  |
| <i>lpg2623</i> | transmembrane protein                                            |             | Unknown / hypothetical proteins          | 9.218  | 11.145 | 9.757  | 11.252 | 5.76E-02 | 5.15E-02 | 1.93  | 1.50  |
| <i>lpg2624</i> | transcription elongation factor GreA                             | <i>greA</i> | Transcription                            | 12.875 | 12.653 | 12.502 | 11.938 | 6.91E-01 | 7.23E-01 | -0.22 | -0.56 |
| <i>lpg2624</i> | transcription elongation factor GreA                             | <i>greA</i> | Transcription                            | 12.699 | 12.638 | 12.336 | 12.525 | 9.13E-01 | 8.46E-01 | -0.06 | 0.19  |
| <i>lpg2625</i> | carbamoyl phosphate synthase, large subunit                      | <i>carB</i> | Nucleotide Metabolism, Amino Acid Me     | 11.479 | 10.359 | 10.958 | 9.883  | 2.32E-01 | 1.78E-01 | -1.12 | -1.07 |
| <i>lpg2625</i> | carbamoyl phosphate synthase, large subunit                      | <i>carB</i> | Nucleotide Metabolism, Amino Acid Me     | 10.588 | 10.145 | 10.386 | 9.838  | 2.04E-01 | 1.71E-01 | -0.44 | -0.55 |
| <i>lpg2626</i> | ORF                                                              |             | ORFs of unknown function (unique)        | 10.271 | 9.788  | 12.097 | 9.071  | 3.26E-01 | 1.82E-03 | -0.48 | -3.03 |
| <i>lpg2626</i> | ORF                                                              |             | ORFs of unknown function (unique)        | 10.039 | 9.847  | 12.018 | 9.708  | 6.18E-01 | 2.30E-04 | -0.19 | -2.31 |
| <i>lpg2627</i> | hypothetical (periplasmic flavoprotein)                          |             | Named proteins of general function       | 8.236  | 8.521  | 8.590  | 8.842  | 5.36E-01 | 5.47E-01 | 0.29  | 0.25  |
| <i>lpg2627</i> | hypothetical (periplasmic flavoprotein)                          |             | Named proteins of general function       | 8.219  | 8.222  | 8.091  | 8.372  | 9.96E-01 | 5.52E-01 | 0.00  | 0.28  |
| <i>lpg2628</i> | membrane protein                                                 |             | Named proteins of general function       | 10.336 | 9.062  | 9.231  | 9.556  | 2.75E-03 | 6.60E-01 | -1.27 | 0.32  |
| <i>lpg2628</i> | membrane protein                                                 |             | Named proteins of general function       | 10.285 | 8.443  | 8.954  | 9.671  | 2.40E-02 | 3.23E-01 | -1.84 | 0.72  |
| <i>lpg2629</i> | permease                                                         |             | Transport and binding                    | 10.279 | 8.668  | 9.346  | 9.354  | 3.54E-03 | 9.84E-01 | -1.61 | 0.01  |
| <i>lpg2629</i> | permease                                                         |             | Transport and binding                    | 9.877  | 8.832  | 8.410  | 9.293  | 2.91E-01 | 4.25E-01 | -1.05 | 0.88  |
| <i>lpg2630</i> | permease                                                         |             | Transport and binding                    | 11.616 | 10.785 | 9.878  | 10.571 | 2.44E-01 | 5.68E-01 | -0.83 | 0.69  |
| <i>lpg2630</i> | permease                                                         |             | Transport and binding                    | 11.339 | 10.873 | 9.638  | 10.973 | 5.64E-01 | 1.35E-01 | -0.47 | 1.33  |
| <i>lpg2631</i> | aminopeptidase A/II (leucine aminopeptidase)                     | <i>pepA</i> | Protein fate / hydrolases / secretion    | 11.016 | 11.148 | 9.030  | 12.076 | 7.18E-01 | 1.73E-03 | 0.13  | 3.05  |
| <i>lpg2631</i> | aminopeptidase A/II (leucine aminopeptidase)                     | <i>pepA</i> | Protein fate / hydrolases / secretion    | 11.012 | 11.306 | 8.711  | 12.119 | 3.90E-01 | 1.54E-03 | 0.29  | 3.41  |
| <i>lpg2632</i> | DNA polymerase III, chi subunit                                  | <i>holC</i> | Replication and Repair                   | 8.134  | 9.299  | 7.983  | 9.218  | 2.71E-01 | 3.36E-03 | 1.16  | 1.23  |
| <i>lpg2632</i> | DNA polymerase III, chi subunit                                  | <i>holC</i> | Replication and Repair                   | 8.944  | 9.851  | 7.583  | 8.952  | 1.08E-01 | 2.93E-02 | 0.91  | 1.37  |
| <i>lpg2633</i> | hypothetical protein                                             |             | Unknown / hypothetical proteins          | 10.356 | 11.850 | 9.592  | 11.974 | 4.35E-04 | 3.30E-03 | 1.49  | 2.38  |
| <i>lpg2633</i> | hypothetical protein                                             |             | Unknown / hypothetical proteins          | 10.395 | 12.157 | 8.685  | 12.402 | 5.47E-03 | 5.59E-03 | 1.76  | 3.72  |
| <i>lpg2634</i> | leucine aminopeptidase (cytosol aminopeptidase)                  |             | Protein fate / hydrolases / secretion    | 9.839  | 10.687 | 9.461  | 11.288 | 3.44E-01 | 3.27E-04 | 0.85  | 1.83  |
| <i>lpg2634</i> | leucine aminopeptidase (cytosol aminopeptidase)                  |             | Protein fate / hydrolases / secretion    | 10.299 | 10.869 | 9.209  | 11.086 | 2.53E-02 | 9.58E-05 | 0.57  | 1.88  |
| <i>lpg2635</i> | integral membrane protein (putative virulence factor) Mvi        | <i>mviN</i> | Toxin production / other pathogen func   | 10.691 | 9.895  | 10.415 | 8.892  | 1.52E-01 | 6.83E-02 | -0.80 | -1.52 |
| <i>lpg2635</i> | integral membrane protein (putative virulence factor) Mvi        | <i>mviN</i> | Toxin production / other pathogen func   | 10.811 | 10.275 | 10.616 | 9.460  | 2.45E-01 | 4.93E-02 | -0.54 | -1.16 |
| <i>lpg2636</i> | 30S ribosomal protein S20                                        | <i>rpsT</i> | Translation                              | 11.882 | 11.457 | 10.301 | 12.155 | 6.47E-01 | 1.24E-02 | -0.42 | 1.85  |
| <i>lpg2636</i> | 30S ribosomal protein S20                                        | <i>rpsT</i> | Translation                              | 12.358 | 11.677 | 10.319 | 12.186 | 1.37E-01 | 8.43E-03 | -0.68 | 1.87  |
| <i>lpg2637</i> | ORF                                                              |             | ORFs of unknown function (unique)        | 14.054 | 14.770 | 12.274 | 14.804 | 1.61E-01 | 4.63E-04 | 0.72  | 2.53  |
| <i>lpg2637</i> | ORF                                                              |             | ORFs of unknown function (unique)        | 13.850 | 14.870 | 12.212 | 14.812 | 6.77E-03 | 5.64E-04 | 0.96  | 2.60  |
| <i>lpg2638</i> | ORF                                                              |             | ORFs of unknown function (unique)        | 11.369 | 12.605 | 11.426 | 12.372 | 1.16E-03 | 4.70E-04 | 1.24  | 0.95  |
| <i>lpg2638</i> | ORF                                                              |             | ORFs of unknown function (unique)        | 10.721 | 12.705 | 11.015 | 12.461 | 9.02E-03 | 5.31E-04 | 1.98  | 1.45  |
| <i>lpg2639</i> | enhanced entry protein EnhC                                      | <i>enhC</i> | Toxin production / other pathogen func   | 12.357 | 12.641 | 14.453 | 11.782 | 4.91E-01 | 1.42E-04 | 0.28  | -2.67 |
| <i>lpg2639</i> | enhanced entry protein EnhC                                      | <i>enhC</i> | Toxin production / other pathogen func   | 12.311 | 12.734 | 14.434 | 11.843 | 3.10E-01 | 2.35E-04 | 0.42  | -2.59 |
| <i>lpg2640</i> | enhanced entry protein EnhB                                      | <i>enhB</i> | Toxin production / other pathogen func   | 10.627 | 11.367 | 13.188 | 9.671  | 1.93E-01 | 1.94E-03 | 0.74  | -3.52 |
| <i>lpg2640</i> | enhanced entry protein EnhB                                      | <i>enhB</i> | Toxin production / other pathogen func   | 10.617 | 11.379 | 13.163 | 9.801  | 2.13E-01 | 1.74E-03 | 0.76  | -3.36 |
| <i>lpg2641</i> | enhanced entry protein EnhA                                      | <i>enhA</i> | Toxin production / other pathogen func   | 9.885  | 10.550 | 12.680 | 9.611  | 3.19E-01 | 1.43E-03 | 0.67  | -3.07 |
| <i>lpg2641</i> | enhanced entry protein EnhA                                      | <i>enhA</i> | Toxin production / other pathogen func   | 9.880  | 10.578 | 12.728 | 9.996  | 3.12E-01 | 5.62E-03 | 0.70  | -2.73 |
| <i>lpg2642</i> | sensory box/GGDEF family protein                                 |             | Signal transduction / other regulatory f | 9.796  | 9.373  | 11.505 | 9.507  | 2.98E-01 | 2.60E-04 | -0.42 | -2.00 |
| <i>lpg2642</i> | sensory box/GGDEF family protein                                 |             | Signal transduction / other regulatory f | 9.901  | 9.133  | 11.553 | 9.573  | 4.94E-02 | 6.48E-04 | -0.77 | -1.98 |
| <i>lpg2643</i> | ORF                                                              |             | ORFs of unknown function (unique)        | 10.830 | 10.832 | 10.156 | 10.829 | 9.94E-01 | 1.85E-01 | 0.00  | 0.67  |
| <i>lpg2643</i> | ORF                                                              |             | ORFs of unknown function (unique)        | 10.940 | 10.613 | 10.119 | 11.030 | 3.90E-01 | 4.94E-02 | -0.33 | 0.91  |

|                |                                                                                 |             |                                          |        |        |        |        |          |          |       |       |
|----------------|---------------------------------------------------------------------------------|-------------|------------------------------------------|--------|--------|--------|--------|----------|----------|-------|-------|
| <i>lpg2644</i> | tail fiber protein (collagen-like protein SclB)                                 | <i>sciB</i> | Named proteins of general function       | 11.342 | 11.699 | 10.779 | 13.174 | 2.90E-01 | 2.97E-04 | 0.36  | 2.39  |
| <i>lpg2644</i> | tail fiber protein (collagen-like protein SclB)                                 | <i>sciB</i> | Named proteins of general function       | 11.136 | 11.703 | 10.698 | 13.192 | 2.80E-01 | 1.86E-04 | 0.57  | 2.49  |
| <i>lpg2645</i> | excinuclease ABC subunit                                                        | <i>uvrC</i> | DNA/RNA degradation / restriction        | 11.410 | 9.850  | 10.793 | 10.545 | 2.98E-02 | 4.36E-01 | -1.56 | -0.25 |
| <i>lpg2645</i> | excinuclease ABC subunit                                                        | <i>uvrC</i> | DNA/RNA degradation / restriction        | 11.500 | 9.375  | 10.576 | 10.469 | 3.23E-03 | 7.93E-01 | -2.12 | -0.11 |
| <i>lpg2646</i> | response regulator GacA (global activator)/transcription $\epsilon$ <i>gacA</i> |             | Signal transduction / other regulatory f | 13.965 | 13.401 | 12.760 | 13.366 | 3.02E-01 | 4.50E-02 | -0.56 | 0.61  |
| <i>lpg2646</i> | response regulator GacA (global activator)/transcription $\epsilon$ <i>gacA</i> |             | Signal transduction / other regulatory f | 13.943 | 13.381 | 12.712 | 13.347 | 2.49E-01 | 4.02E-02 | -0.56 | 0.64  |
| <i>lpg2647</i> | phenylalanine-4-hydroxylase (PAH) (Phe-4-monooxygen; <i>phhA</i> )              |             | Amino Acid Metabolism                    | 12.761 | 12.289 | 12.643 | 12.582 | 9.12E-02 | 7.75E-01 | -0.47 | -0.06 |
| <i>lpg2647</i> | phenylalanine-4-hydroxylase (PAH) (Phe-4-monooxygen; <i>phhA</i> )              |             | Amino Acid Metabolism                    | 12.768 | 12.256 | 12.609 | 12.573 | 3.42E-02 | 8.41E-01 | -0.51 | -0.04 |
| <i>lpg2648</i> | competence damage inducible protein ClnA (predicted nt <i>cinA</i> )            |             | Toxin production / other pathogen func   | 8.908  | 9.238  | 9.504  | 8.815  | 5.71E-01 | 1.28E-01 | 0.33  | -0.69 |
| <i>lpg2648</i> | competence damage inducible protein ClnA (predicted nt <i>cinA</i> )            |             | Toxin production / other pathogen func   | 9.126  | 9.962  | 9.292  | 9.583  | 8.50E-02 | 6.06E-01 | 0.84  | 0.29  |
| <i>lpg2649</i> | GTP-binding protein, GTP1/Obg family                                            |             | Signal transduction / other regulatory f | 9.545  | 9.128  | 9.536  | 10.163 | 3.67E-01 | 3.08E-01 | -0.42 | 0.63  |
| <i>lpg2649</i> | GTP-binding protein, GTP1/Obg family                                            |             | Signal transduction / other regulatory f | 9.460  | 9.884  | 9.960  | 11.576 | 5.88E-01 | 1.65E-01 | 0.42  | 1.62  |
| <i>lpg2650</i> | 50S ribosomal protein L27                                                       | <i>rpmA</i> | Translation                              | 13.641 | 13.330 | 11.928 | 14.387 | 6.88E-01 | 2.97E-02 | -0.31 | 2.46  |
| <i>lpg2650</i> | 50S ribosomal protein L27                                                       | <i>rpmA</i> | Translation                              | 13.590 | 13.908 | 12.026 | 15.206 | 6.86E-01 | 2.01E-04 | 0.32  | 3.18  |
| <i>lpg2651</i> | 50S ribosomal protein L21                                                       | <i>rplU</i> | Translation                              | 13.089 | 12.583 | 10.015 | 14.430 | 6.47E-01 | 1.43E-03 | -0.51 | 4.42  |
| <i>lpg2651</i> | 50S ribosomal protein L21                                                       | <i>rplU</i> | Translation                              | 13.181 | 13.404 | 10.006 | 14.654 | 8.21E-01 | 5.20E-04 | 0.22  | 4.65  |
| <i>lpg2652</i> | 50S ribosomal protein L25, ribosomal 5S rRNA E-loop binding protein             |             | Translation                              | 12.453 | 11.133 | 10.520 | 12.817 | 2.01E-01 | 3.50E-02 | -1.32 | 2.30  |
| <i>lpg2652</i> | 50S ribosomal protein L25, ribosomal 5S rRNA E-loop binding protein             |             | Translation                              | 12.720 | 11.615 | 10.396 | 13.375 | 1.02E-01 | 5.43E-03 | -1.11 | 2.98  |
| <i>lpg2653</i> | peptidyl tRNA hydrolase                                                         | <i>pth</i>  | DNA/RNA degradation / restriction, Pr    | 12.730 | 11.340 | 11.189 | 12.271 | 7.17E-03 | 2.49E-01 | -1.39 | 1.08  |
| <i>lpg2653</i> | peptidyl tRNA hydrolase                                                         | <i>pth</i>  | DNA/RNA degradation / restriction, Pr    | 12.849 | 11.292 | 10.732 | 12.274 | 7.45E-03 | 1.55E-01 | -1.56 | 1.54  |
| <i>lpg2654</i> | GTP binding protein                                                             |             | Signal transduction / other regulatory f | 11.114 | 10.708 | 10.182 | 11.735 | 5.36E-01 | 1.66E-02 | -0.41 | 1.55  |
| <i>lpg2654</i> | GTP binding protein                                                             |             | Signal transduction / other regulatory f | 11.407 | 10.695 | 10.091 | 11.750 | 1.01E-01 | 2.35E-02 | -0.71 | 1.66  |
| <i>lpg2655</i> | sensory box protein (cGMP turnover?)                                            |             | Signal transduction / other regulatory f | 10.392 | 9.725  | 12.392 | 10.136 | 5.60E-01 | 3.11E-04 | -0.67 | -2.26 |
| <i>lpg2655</i> | sensory box protein (cGMP turnover?)                                            |             | Signal transduction / other regulatory f | 9.801  | 10.237 | 11.661 | 9.875  | 4.75E-01 | 2.06E-03 | 0.44  | -1.79 |
| <i>lpg2656</i> | octaprenyl diphosphate synthase IspB (polyprenyl synthetase)                    |             | Named proteins of general function       | 13.545 | 12.828 | 11.215 | 12.660 | 2.55E-01 | 3.01E-02 | -0.72 | 1.44  |
| <i>lpg2656</i> | octaprenyl diphosphate synthase IspB (polyprenyl synthetase)                    |             | Named proteins of general function       | 13.001 | 12.892 | 10.674 | 12.687 | 9.12E-01 | 2.14E-02 | -0.11 | 2.01  |
| <i>lpg2657</i> | ferrous iron transporter B                                                      | <i>feoB</i> | Transport and binding                    | 10.335 | 7.710  | 8.689  | 7.883  | 6.12E-02 | 6.64E-01 | -2.63 | -0.81 |
| <i>lpg2657</i> | ferrous iron transporter B                                                      | <i>feoB</i> | Transport and binding                    | 10.243 | 8.456  | 9.912  | 9.708  | 3.78E-04 | 5.94E-01 | -1.79 | -0.20 |
| <i>lpg2658</i> | ferrous iron transporter A                                                      | <i>feoA</i> | Transport and binding                    | 11.064 | 10.462 | 10.619 | 11.017 | 1.13E-02 | 1.71E-02 | -0.60 | 0.40  |
| <i>lpg2658</i> | ferrous iron transporter A                                                      | <i>feoA</i> | Transport and binding                    | 11.086 | 10.157 | 10.574 | 11.071 | 3.51E-02 | 9.68E-03 | -0.93 | 0.50  |
| <i>lpg2659</i> | ATPase N2B (nucleotide (GTP) binding protein), COG1485                          |             | Signal transduction / other regulatory f | 10.639 | 10.806 | 9.670  | 11.726 | 8.70E-01 | 1.00E-03 | 0.17  | 2.06  |
| <i>lpg2659</i> | ATPase N2B (nucleotide (GTP) binding protein), COG1485                          |             | Signal transduction / other regulatory f | 11.163 | 10.717 | 9.187  | 11.546 | 3.44E-01 | 1.19E-02 | -0.45 | 2.36  |
| <i>lpg2660</i> | transmembrane protein (esterase/lipase/thioesterase family active site)         |             | Named proteins of general function       | 11.421 | 11.331 | 11.975 | 12.138 | 6.71E-01 | 1.69E-01 | -0.09 | 0.16  |
| <i>lpg2660</i> | transmembrane protein (esterase/lipase/thioesterase family active site)         |             | Named proteins of general function       | 11.268 | 11.248 | 11.600 | 12.047 | 9.25E-01 | 1.29E-02 | -0.02 | 0.45  |
| <i>lpg2661</i> | 3-methyl-2-oxobutanoate hydroxymethyltransferase (kctc <i>panB</i> )            |             | Metabolism of Cofactors and Vitamins     | 14.168 | 13.298 | 12.092 | 14.697 | 7.02E-02 | 2.04E-04 | -0.87 | 2.60  |
| <i>lpg2661</i> | 3-methyl-2-oxobutanoate hydroxymethyltransferase (kctc <i>panB</i> )            |             | Metabolism of Cofactors and Vitamins     | 14.026 | 13.216 | 11.818 | 14.653 | 5.14E-02 | 2.41E-04 | -0.81 | 2.84  |
| <i>lpg2662</i> | pantoate-beta-alanine ligase (pantothenate synthetase) <i>panC</i>              |             | Metabolism of Other Amino Acids, Met     | 11.204 | 11.357 | 9.585  | 12.416 | 7.96E-01 | 1.43E-04 | 0.15  | 2.83  |
| <i>lpg2662</i> | pantoate-beta-alanine ligase (pantothenate synthetase) <i>panC</i>              |             | Metabolism of Other Amino Acids, Met     | 11.148 | 10.573 | 9.171  | 12.247 | 2.39E-01 | 1.78E-04 | -0.58 | 3.08  |
| <i>lpg2663</i> | hypothetical protein                                                            |             | Unknown / hypothetical proteins          | 10.563 | 8.975  | 9.773  | 9.036  | 2.81E-03 | 1.27E-01 | -1.59 | -0.74 |
| <i>lpg2663</i> | hypothetical protein                                                            |             | Unknown / hypothetical proteins          | 10.679 | 8.721  | 9.984  | 9.308  | 2.36E-04 | 1.58E-01 | -1.96 | -0.68 |
| <i>lpg2664</i> | acetyl-CoA carboxylase, biotin carboxylase subunit (pyruvate carboxy            |             | Carbohydrate Metabolism, Amino Acid      | 12.133 | 11.840 | 12.517 | 12.226 | 2.21E-01 | 1.21E-01 | -0.29 | -0.29 |
| <i>lpg2664</i> | acetyl-CoA carboxylase, biotin carboxylase subunit (pyruvate carboxy            |             | Carbohydrate Metabolism, Amino Acid      | 12.132 | 11.706 | 12.453 | 12.251 | 9.70E-02 | 2.68E-01 | -0.43 | -0.20 |
| <i>lpg2665</i> | dienelactone hydrolase family protein                                           |             | Named proteins of general function       | 12.163 | 12.079 | 12.231 | 12.752 | 7.65E-01 | 9.29E-02 | -0.08 | 0.52  |
| <i>lpg2665</i> | dienelactone hydrolase family protein                                           |             | Named proteins of general function       | 12.032 | 12.070 | 11.792 | 12.770 | 9.14E-01 | 4.00E-02 | 0.04  | 0.98  |
| <i>lpg2666</i> | probable hydrolase                                                              |             | Protein fate / hydrolases / secretion    | 10.699 | 11.021 | 13.354 | 10.240 | 7.13E-01 | 1.31E-03 | 0.32  | -3.11 |
| <i>lpg2666</i> | probable hydrolase                                                              |             | Protein fate / hydrolases / secretion    | 10.728 | 11.106 | 13.357 | 10.405 | 6.79E-01 | 2.44E-03 | 0.38  | -2.95 |
| <i>lpg2667</i> | RNA polymerase sigma-32 factor (sigma factor RpoH)                              | <i>rpoH</i> | Transcription factors / DNA binding prc  | 12.540 | 11.474 | 11.284 | 11.137 | 9.42E-02 | 7.89E-01 | -1.07 | -0.15 |
| <i>lpg2667</i> | RNA polymerase sigma-32 factor (sigma factor RpoH)                              | <i>rpoH</i> | Transcription factors / DNA binding prc  | 12.504 | 11.420 | 11.269 | 11.253 | 8.94E-02 | 9.73E-01 | -1.08 | -0.02 |
| <i>lpg2668</i> | cell division ATP transporter (permease protein) FtsX                           | <i>ftsX</i> | Transport and binding, Chemotaxis / r    | 9.887  | 10.169 | 9.627  | 10.231 | 4.59E-01 | 5.55E-02 | 0.28  | 0.60  |
| <i>lpg2668</i> | cell division ATP transporter (permease protein) FtsX                           | <i>ftsX</i> | Transport and binding, Chemotaxis / r    | 10.016 | 10.083 | 9.235  | 10.133 | 8.46E-01 | 5.29E-02 | 0.07  | 0.90  |
| <i>lpg2669</i> | cell division ATP transporter (ATP binding protein) FtsE                        | <i>ftsE</i> | Chemotaxis / motility / cell division    | 10.878 | 9.541  | 9.448  | 10.065 | 2.91E-05 | 1.48E-01 | -1.34 | 0.62  |
| <i>lpg2669</i> | cell division ATP transporter (ATP binding protein) FtsE                        | <i>ftsE</i> | Chemotaxis / motility / cell division    | 11.018 | 9.411  | 9.453  | 10.310 | 8.83E-04 | 1.04E-01 | -1.61 | 0.86  |
| <i>lpg2670</i> | cell division membrane protein FtsY (signal recognition p                       | <i>ftsY</i> | Protein fate / hydrolases / secretion, C | 10.463 | 10.925 | 10.435 | 11.716 | 2.86E-01 | 2.52E-02 | 0.46  | 1.28  |
| <i>lpg2670</i> | cell division membrane protein FtsY (signal recognition p                       | <i>ftsY</i> | Protein fate / hydrolases / secretion, C | 10.622 | 10.716 | 10.298 | 11.682 | 8.78E-01 | 8.75E-03 | 0.09  | 1.38  |
| <i>lpg2671</i> | zinc protease (peptidase, M16 family)                                           |             | Protein fate / hydrolases / secretion    | 11.497 | 11.448 | 10.943 | 10.667 | 9.54E-01 | 5.36E-01 | -0.05 | -0.28 |
| <i>lpg2671</i> | zinc protease (peptidase, M16 family)                                           |             | Protein fate / hydrolases / secretion    | 10.539 | 11.353 | 10.502 | 10.687 | 2.74E-02 | 5.90E-01 | 0.81  | 0.18  |
| <i>lpg2672</i> | zinc protease (peptidase, M16 family)                                           |             | Protein fate / hydrolases / secretion    | 11.167 | 12.322 | 11.341 | 11.196 | 2.24E-03 | 6.94E-01 | 1.16  | -0.15 |
| <i>lpg2672</i> | zinc protease (peptidase, M16 family)                                           |             | Protein fate / hydrolases / secretion    | 11.151 | 12.288 | 11.153 | 11.193 | 2.63E-03 | 9.04E-01 | 1.14  | 0.04  |
| <i>lpg2673</i> | N6-adenine specific methylase (DNA methylase)                                   |             | Metabolism of Cofactors and Vitamins     | 9.920  | 10.502 | 10.160 | 10.445 | 3.51E-01 | 6.73E-01 | 0.58  | 0.28  |
| <i>lpg2673</i> | N6-adenine specific methylase (DNA methylase)                                   |             | Metabolism of Cofactors and Vitamins     | 10.059 | 10.380 | 10.294 | 10.925 | 6.03E-01 | 1.96E-01 | 0.32  | 0.63  |
| <i>lpg2674</i> | DotD (TraH)                                                                     | <i>dotD</i> | Transport and binding, Toxin productio   | 13.072 | 12.543 | 11.716 | 12.916 | 2.31E-01 | 7.69E-03 | -0.53 | 1.20  |
| <i>lpg2674</i> | DotD (TraH)                                                                     | <i>dotD</i> | Transport and binding, Toxin productio   | 13.035 | 12.478 | 11.689 | 12.963 | 2.16E-01 | 4.91E-03 | -0.56 | 1.27  |
| <i>lpg2675</i> | DotC (TraI)                                                                     | <i>dotC</i> | Transport and binding, Toxin productio   | 12.501 | 11.066 | 11.194 | 11.940 | 1.42E-02 | 1.58E-01 | -1.43 | 0.75  |
| <i>lpg2675</i> | DotC (TraI)                                                                     | <i>dotC</i> | Transport and binding, Toxin productio   | 12.576 | 11.213 | 11.200 | 11.957 | 2.94E-02 | 1.63E-01 | -1.36 | 0.76  |



|                |                                                                         |             |                                          |        |        |        |        |          |          |       |       |
|----------------|-------------------------------------------------------------------------|-------------|------------------------------------------|--------|--------|--------|--------|----------|----------|-------|-------|
| <i>lpg2708</i> | ferredoxin 2Fe-2S protein                                               |             | Energy Metabolism                        | 13.205 | 11.940 | 13.399 | 12.033 | 1.42E-01 | 7.27E-02 | -1.27 | -1.37 |
| <i>lpg2708</i> | ferredoxin 2Fe-2S protein                                               |             | Energy Metabolism                        | 13.117 | 12.143 | 13.307 | 12.455 | 1.73E-02 | 1.19E-02 | -0.97 | -0.85 |
| <i>lpg2709</i> | integration host factor (IHF) alpha subunit - recombinatio              | <i>ihfA</i> | Transcription, Replication and Repair    | 11.518 | 10.046 | 12.770 | 10.147 | 1.47E-02 | 5.45E-03 | -1.47 | -2.62 |
| <i>lpg2709</i> | integration host factor (IHF) alpha subunit - recombinatio              | <i>ihfA</i> | Transcription, Replication and Repair    | 11.466 | 10.434 | 12.745 | 11.067 | 2.02E-02 | 5.08E-06 | -1.03 | -1.62 |
| <i>lpg2710</i> | phenylalanyl tRNA synthetase, beta subunit                              | <i>pheT</i> | Amino Acid Metabolism, Translation       | 11.314 | 10.406 | 9.663  | 11.285 | 2.25E-01 | 9.44E-02 | -0.91 | -1.68 |
| <i>lpg2710</i> | phenylalanyl tRNA synthetase, beta subunit                              | <i>pheT</i> | Amino Acid Metabolism, Translation       | 11.331 | 11.054 | 9.954  | 11.857 | 5.49E-01 | 5.56E-03 | -0.28 | 1.90  |
| <i>lpg2711</i> | phenylalanyl tRNA synthetase, alpha subunit                             | <i>pheS</i> | Amino Acid Metabolism, Translation       | 11.291 | 11.428 | 9.150  | 11.952 | 8.19E-01 | 2.44E-02 | 0.14  | 2.80  |
| <i>lpg2711</i> | phenylalanyl tRNA synthetase, alpha subunit                             | <i>pheS</i> | Amino Acid Metabolism, Translation       | 11.304 | 11.641 | 9.391  | 12.408 | 5.47E-01 | 9.65E-03 | 0.34  | 3.02  |
| <i>lpg2712</i> | 50S ribosomal protein L20                                               | <i>rplT</i> | Translation                              | 14.759 | 13.980 | 12.976 | 14.154 | 5.34E-01 | 3.05E-01 | -0.78 | 1.18  |
| <i>lpg2712</i> | 50S ribosomal protein L20                                               | <i>rplT</i> | Translation                              | 14.327 | 14.434 | 12.577 | 14.521 | 8.83E-01 | 2.25E-02 | 0.11  | 1.94  |
| <i>lpg2713</i> | translational initiation factor IF-3                                    | <i>infC</i> | Translation                              | 14.664 | 15.135 | 13.157 | 15.429 | 2.02E-01 | 3.05E-03 | 0.47  | 2.27  |
| <i>lpg2713</i> | translational initiation factor IF-3                                    | <i>infC</i> | Translation                              | 14.746 | 15.109 | 13.163 | 15.448 | 3.94E-01 | 2.45E-03 | 0.36  | 2.28  |
| <i>lpg2714</i> | threonyl tRNA synthase                                                  | <i>thrS</i> | Amino Acid Metabolism, Translation       | 11.936 | 11.723 | 11.733 | 11.543 | 4.16E-01 | 6.10E-01 | -0.21 | -0.19 |
| <i>lpg2714</i> | threonyl tRNA synthase                                                  | <i>thrS</i> | Amino Acid Metabolism, Translation       | 11.966 | 11.605 | 11.674 | 11.744 | 2.64E-01 | 8.49E-01 | -0.36 | 0.07  |
| <i>lpg2715</i> | tRNA-Val                                                                |             | tRNA                                     | 10.962 | 7.855  | 9.512  | 8.786  | 3.21E-03 | 3.77E-01 | -3.11 | -0.73 |
| <i>lpg2715</i> | tRNA-Val                                                                |             | tRNA                                     | 10.150 | 8.629  | 8.313  | 9.058  | 3.31E-01 | 6.29E-01 | -1.52 | 0.74  |
| <i>lpg2716</i> | small ORF (95aa) hypothetical                                           |             | Unknown / hypothetical proteins          | 9.299  | 9.329  | 9.587  | 9.606  | 9.50E-01 | 9.62E-01 | 0.03  | 0.02  |
| <i>lpg2716</i> | small ORF (95aa) hypothetical                                           |             | Unknown / hypothetical proteins          | 9.518  | 10.055 | 9.173  | 10.104 | 4.32E-01 | 1.25E-01 | 0.54  | 0.93  |
| <i>lpg2717</i> | small ORF (161aa)                                                       |             | ORFs of unknown function (unique)        | 9.452  | 8.928  | 8.702  | 9.597  | 3.21E-01 | 9.85E-02 | -0.52 | 0.89  |
| <i>lpg2717</i> | small ORF (161aa)                                                       |             | ORFs of unknown function (unique)        | 9.328  | 9.202  | 8.557  | 10.090 | 8.27E-01 | 4.28E-02 | -0.13 | 1.53  |
| <i>lpg2718</i> | ORF                                                                     | <i>wipA</i> | ORFs of unknown function (unique)        | 10.649 | 9.355  | 9.024  | 8.901  | 4.16E-05 | 8.39E-01 | -1.29 | -0.12 |
| <i>lpg2718</i> | ORF                                                                     | <i>wipA</i> | ORFs of unknown function (unique)        | 10.342 | 8.739  | 8.330  | 8.614  | 7.23E-02 | 7.81E-01 | -1.60 | 0.28  |
| <i>lpg2719</i> | conserved hypothetical protein                                          |             | Unknown / hypothetical proteins          | 9.031  | 8.027  | 12.062 | 8.175  | 1.57E-01 | 1.82E-03 | -1.00 | -3.89 |
| <i>lpg2719</i> | conserved hypothetical protein                                          |             | Unknown / hypothetical proteins          | 8.900  | 8.654  | 12.097 | 9.089  | 7.00E-01 | 1.62E-02 | -0.25 | -3.01 |
| <i>lpg2720</i> | hypothetical protein                                                    |             | Unknown / hypothetical proteins          | 8.487  | 7.311  | 12.084 | 5.922  | 3.34E-01 | 2.07E-03 | -1.18 | -6.16 |
| <i>lpg2720</i> | hypothetical protein                                                    |             | Unknown / hypothetical proteins          | 7.693  | 7.952  | 11.947 | 6.905  | 8.42E-01 | 1.39E-05 | 0.26  | -5.04 |
| <i>lpg2721</i> | glutamine amidotransferase                                              |             | Amino Acid Metabolism, Nucleotide M      | 9.378  | 9.798  | 11.160 | 9.737  | 2.41E-01 | 8.27E-02 | 0.42  | -1.42 |
| <i>lpg2721</i> | glutamine amidotransferase                                              |             | Amino Acid Metabolism, Nucleotide M      | 9.401  | 9.774  | 11.162 | 10.465 | 4.71E-01 | 2.42E-01 | 0.37  | -0.70 |
| <i>lpg2722</i> | NADH-dependent flavin oxidoreductase, Oye family (N-ethylmaleimid       |             | Metabolism of Cofactors and Vitamins     | 12.274 | 13.205 | 11.931 | 13.861 | 4.14E-03 | 1.41E-06 | 0.93  | 1.93  |
| <i>lpg2722</i> | NADH-dependent flavin oxidoreductase, Oye family (N-ethylmaleimid       |             | Metabolism of Cofactors and Vitamins     | 12.274 | 13.166 | 11.856 | 13.849 | 6.99E-03 | 5.35E-06 | 0.89  | 1.99  |
| <i>lpg2723</i> | transcriptional regulator (ArsR family)                                 |             | Transcription factors / DNA binding prc  | 12.231 | 10.142 | 11.087 | 10.162 | 1.75E-02 | 5.35E-03 | -2.09 | -0.92 |
| <i>lpg2723</i> | transcriptional regulator (ArsR family)                                 |             | Transcription factors / DNA binding prc  | 12.515 | 10.064 | 10.893 | 10.188 | 5.03E-04 | 4.45E-02 | -2.45 | -0.71 |
| <i>lpg2724</i> | small ORF (114aa)                                                       |             | ORFs of unknown function (unique)        | 10.118 | 10.427 | 11.277 | 10.243 | 3.95E-01 | 6.23E-02 | 0.31  | -1.03 |
| <i>lpg2724</i> | small ORF (114aa)                                                       |             | ORFs of unknown function (unique)        | 10.144 | 10.396 | 11.246 | 10.216 | 4.92E-01 | 7.93E-02 | 0.25  | -1.03 |
| <i>lpg2725</i> | inner membrane protein                                                  |             | Named proteins of general function       | 8.159  | 10.986 | 8.973  | 10.382 | 2.75E-03 | 1.78E-01 | 2.83  | 1.41  |
| <i>lpg2725</i> | inner membrane protein                                                  |             | Named proteins of general function       | 7.923  | 11.563 | 8.821  | 11.659 | 1.67E-03 | 3.61E-02 | 3.64  | 2.84  |
| <i>lpg2726</i> | peptidylprolyl cis-trans isomerase B (cyclophilin-type) Lcy <i>ppiB</i> |             | Cell envelope synthesis, Toxin product   | 12.298 | 10.059 | 11.959 | 11.515 | 1.91E-04 | 4.66E-02 | -2.24 | -0.44 |
| <i>lpg2726</i> | peptidylprolyl cis-trans isomerase B (cyclophilin-type) Lcy <i>ppiB</i> |             | Cell envelope synthesis, Toxin product   | 12.230 | 9.821  | 12.017 | 11.587 | 1.01E-04 | 4.61E-02 | -2.41 | -0.43 |
| <i>lpg2727</i> | queuine/archaeosine tRNA-ribosyltransferase (tRNA-gua <i>tgt</i>        |             | DNA/RNA degradation / restriction, Tr    | 11.271 | 10.068 | 10.079 | 11.726 | 2.02E-02 | 2.49E-02 | -1.20 | 1.65  |
| <i>lpg2727</i> | queuine/archaeosine tRNA-ribosyltransferase (tRNA-gua <i>tgt</i>        |             | DNA/RNA degradation / restriction, Tr    | 11.223 | 9.649  | 10.013 | 11.705 | 2.43E-02 | 4.64E-03 | -1.57 | 1.69  |
| <i>lpg2728</i> | ORF                                                                     |             | ORFs of unknown function (unique)        | 11.762 | 10.424 | 11.831 | 10.486 | 2.67E-05 | 1.39E-02 | -1.34 | -1.34 |
| <i>lpg2728</i> | ORF                                                                     |             | ORFs of unknown function (unique)        | 11.783 | 10.426 | 11.749 | 10.438 | 4.48E-04 | 8.20E-03 | -1.36 | -1.31 |
| <i>lpg2729</i> | protein-disulfide oxidoreductase (disulfide bond formatio               | <i>dsbH</i> | Protein fate / hydrolases / secretion    | 11.577 | 11.310 | 10.238 | 11.202 | 3.52E-01 | 1.02E-01 | -0.27 | 0.96  |
| <i>lpg2729</i> | protein-disulfide oxidoreductase (disulfide bond formatio               | <i>dsbH</i> | Protein fate / hydrolases / secretion    | 11.509 | 11.764 | 9.460  | 11.430 | 6.65E-01 | 2.45E-03 | 0.25  | 1.97  |
| <i>lpg2730</i> | cytochrome c5                                                           | <i>cycB</i> | Energy Metabolism                        | 12.845 | 13.377 | 12.543 | 13.670 | 9.22E-02 | 3.50E-04 | 0.53  | 1.13  |
| <i>lpg2730</i> | cytochrome c5                                                           | <i>cycB</i> | Energy Metabolism                        | 12.853 | 13.401 | 12.584 | 13.790 | 8.65E-02 | 2.84E-04 | 0.55  | 1.21  |
| <i>lpg2731</i> | aminotransferase class II (8-amino-7-oxononoate synthetase) (glyc       |             | Amino Acid Metabolism                    | 9.907  | 9.897  | 10.362 | 9.470  | 9.82E-01 | 4.23E-01 | -0.01 | -0.89 |
| <i>lpg2731</i> | aminotransferase class II (8-amino-7-oxononoate synthetase) (glyc       |             | Amino Acid Metabolism                    | 10.045 | 10.122 | 10.350 | 9.487  | 8.78E-01 | 3.73E-01 | 0.08  | -0.86 |
| <i>lpg2732</i> | (two component) response regulator                                      |             | Signal transduction / other regulatory f | 12.361 | 11.894 | 12.729 | 12.143 | 7.24E-02 | 3.63E-02 | -0.47 | -0.59 |
| <i>lpg2732</i> | (two component) response regulator                                      |             | Signal transduction / other regulatory f | 12.409 | 11.855 | 12.784 | 12.218 | 8.64E-02 | 2.75E-02 | -0.55 | -0.57 |
| <i>lpg2733</i> | hypothetical (transmembrane protein)                                    |             | Named proteins of general function       | 10.804 | 11.109 | 13.161 | 10.748 | 5.18E-01 | 2.74E-03 | 0.30  | -2.41 |
| <i>lpg2733</i> | hypothetical (transmembrane protein)                                    |             | Named proteins of general function       | 10.976 | 11.780 | 13.224 | 11.424 | 3.27E-02 | 6.36E-03 | 0.80  | -1.80 |
| <i>lpg2734</i> | sensor protein LuxN (transmembrane sensor histidine kinase/transcri     |             | Signal transduction / other regulatory f | 12.475 | 11.488 | 12.785 | 11.155 | 5.12E-03 | 1.07E-03 | -0.99 | -1.63 |
| <i>lpg2734</i> | sensor protein LuxN (transmembrane sensor histidine kinase/transcri     |             | Signal transduction / other regulatory f | 12.455 | 11.639 | 12.720 | 11.319 | 1.12E-02 | 1.07E-03 | -0.82 | -1.40 |
| <i>lpg2735</i> | porphobilinogen deaminase (hydroxymethylbilane synthesis)               |             | Metabolism of Cofactors and Vitamins     | 10.931 | 11.280 | 9.816  | 11.200 | 4.71E-01 | 2.33E-02 | 0.35  | 1.38  |
| <i>lpg2735</i> | porphobilinogen deaminase (hydroxymethylbilane synthesis)               |             | Metabolism of Cofactors and Vitamins     | 10.780 | 11.236 | 9.248  | 11.345 | 4.21E-01 | 2.32E-03 | 0.46  | 2.10  |
| <i>lpg2736</i> | uroporphyrinogen III methylase (uroporphyrinogen-III synthase)          |             | Metabolism of Cofactors and Vitamins     | 11.643 | 10.555 | 11.630 | 11.587 | 1.12E-01 | 8.75E-01 | -1.09 | -0.04 |
| <i>lpg2736</i> | uroporphyrinogen III methylase (uroporphyrinogen-III synthase)          |             | Metabolism of Cofactors and Vitamins     | 11.691 | 10.972 | 11.428 | 11.611 | 7.58E-02 | 6.12E-01 | -0.72 | 0.18  |
| <i>lpg2737</i> | uroporphyrinogen III methylase (uroporphyrin-III C-methyltransferase)   |             | Metabolism of Cofactors and Vitamins     | 11.177 | 10.651 | 11.568 | 10.035 | 4.16E-01 | 7.41E-05 | -0.53 | -1.53 |
| <i>lpg2737</i> | uroporphyrinogen III methylase (uroporphyrin-III C-methyltransferase)   |             | Metabolism of Cofactors and Vitamins     | 11.365 | 10.123 | 11.685 | 10.188 | 2.57E-04 | 4.77E-05 | -1.24 | -1.50 |
| <i>lpg2738</i> | protoheme IX synthesis HemY                                             | <i>hemY</i> | Metabolism of Cofactors and Vitamins     | 11.260 | 10.561 | 11.545 | 10.088 | 8.92E-02 | 7.06E-02 | -0.70 | -1.46 |
| <i>lpg2738</i> | protoheme IX synthesis HemY                                             | <i>hemY</i> | Metabolism of Cofactors and Vitamins     | 11.224 | 11.163 | 11.539 | 10.968 | 9.10E-01 | 4.88E-02 | -0.06 | -0.57 |
| <i>lpg2739</i> | cation efflux system protein (cobalt zinc cadmium resistance protein C  |             | Transport and binding                    | 11.679 | 10.206 | 11.886 | 10.457 | 4.21E-06 | 7.17E-05 | -1.47 | -1.43 |
| <i>lpg2739</i> | cation efflux system protein (cobalt zinc cadmium resistance protein C  |             | Transport and binding                    | 11.634 | 10.223 | 11.751 | 10.480 | 1.43E-05 | 2.60E-04 | -1.41 | -1.27 |

|                |                                                                   |              |                                           |        |        |        |        |          |          |       |       |
|----------------|-------------------------------------------------------------------|--------------|-------------------------------------------|--------|--------|--------|--------|----------|----------|-------|-------|
| <i>lpg2740</i> | hypothetical (DNA integration/recombination/reversion protein?)   |              | Viral functions / Phage / Transposases    | 13.186 | 11.825 | 13.148 | 12.664 | 1.93E-02 | 3.00E-02 | -1.36 | -0.48 |
| <i>lpg2740</i> | hypothetical (DNA integration/recombination/reversion protein?)   |              | Viral functions / Phage / Transposases    | 12.731 | 11.749 | 13.139 | 12.721 | 2.72E-03 | 4.44E-02 | -0.98 | -0.42 |
| <i>lpg2741</i> | oligoribonuclease                                                 | <i>orn</i>   | DNA/RNA degradation / restriction         | 11.411 | 9.367  | 12.085 | 10.988 | 8.26E-02 | 8.74E-02 | -2.04 | -1.10 |
| <i>lpg2741</i> | oligoribonuclease                                                 | <i>orn</i>   | DNA/RNA degradation / restriction         | 11.348 | 10.005 | 11.301 | 10.411 | 8.91E-03 | 2.35E-01 | -1.34 | -0.89 |
| <i>lpg2742</i> | tRNA nucleotidyltransferase                                       |              | Translation                               | 10.233 | 9.076  | 11.033 | 9.495  | 8.81E-02 | 4.74E-03 | -1.16 | -1.54 |
| <i>lpg2742</i> | tRNA nucleotidyltransferase                                       |              | Translation                               | 10.179 | 8.560  | 11.094 | 9.677  | 4.48E-02 | 3.46E-02 | -1.62 | -1.42 |
| <i>lpg2743</i> | EngC GTPase (cell wall endoglucanase related?)                    |              | Cell envelope synthesis, Signal transd    | 11.178 | 11.030 | 11.602 | 11.182 | 5.52E-01 | 1.14E-01 | -0.15 | -0.42 |
| <i>lpg2743</i> | EngC GTPase (cell wall endoglucanase related?)                    |              | Cell envelope synthesis, Signal transd    | 11.196 | 11.015 | 11.257 | 10.975 | 5.80E-01 | 2.18E-01 | -0.18 | -0.28 |
| <i>lpg2744</i> | ORF                                                               |              | ORFs of unknown function (unique)         | 8.539  | 8.673  | 9.667  | 8.820  | 7.27E-01 | 5.92E-03 | 0.13  | -0.85 |
| <i>lpg2744</i> | ORF                                                               |              | ORFs of unknown function (unique)         | 7.582  | 9.531  | 9.415  | 9.527  | 2.01E-02 | 8.30E-01 | 1.95  | 0.11  |
| <i>lpg2745</i> | ORF                                                               |              | ORFs of unknown function (unique)         | 9.618  | 8.684  | 7.948  | 8.994  | 1.27E-01 | 3.75E-01 | -0.93 | 1.05  |
| <i>lpg2745</i> | ORF                                                               |              | ORFs of unknown function (unique)         | 9.316  | 9.287  | 6.177  | 7.595  | 9.74E-01 | 3.80E-01 | -0.03 | 1.42  |
| <i>lpg2752</i> | tRNA-Ile                                                          |              | tRNA                                      | 11.583 | 11.727 | 10.975 | 12.220 | 8.01E-01 | 1.36E-02 | 0.14  | 1.24  |
| <i>lpg2752</i> | tRNA-Ile                                                          |              | tRNA                                      | 11.564 | 11.758 | 10.898 | 12.239 | 7.65E-01 | 2.02E-02 | 0.19  | 1.34  |
| <i>lpg2753</i> | 16S rRNA                                                          |              | rRNA                                      | 15.476 | 15.607 | 15.627 | 15.617 | 5.61E-01 | 9.60E-01 | 0.13  | -0.01 |
| <i>lpg2753</i> | 16S rRNA                                                          |              | rRNA                                      | 15.393 | 15.490 | 15.705 | 15.706 | 6.59E-01 | 9.96E-01 | 0.10  | 0.00  |
| <i>lpg2754</i> | DNA polymerase III subunits gamma and tau                         | <i>dnaZX</i> | Nucleotide Metabolism, Replication an     | 12.705 | 12.852 | 12.485 | 13.653 | 4.90E-01 | 5.65E-06 | 0.15  | 1.17  |
| <i>lpg2754</i> | DNA polymerase III subunits gamma and tau                         | <i>dnaZX</i> | Nucleotide Metabolism, Replication an     | 12.695 | 12.873 | 12.462 | 13.646 | 3.20E-01 | 2.72E-06 | 0.18  | 1.18  |
| <i>lpg2755</i> | hypothetical (transcription regulatory protein TIGR00103?)        |              | Transcription factors / DNA binding prc   | 13.166 | 12.390 | 12.889 | 12.438 | 4.50E-02 | 1.17E-01 | -0.78 | -0.45 |
| <i>lpg2755</i> | hypothetical (transcription regulatory protein TIGR00103?)        |              | Transcription factors / DNA binding prc   | 13.221 | 12.316 | 12.887 | 12.461 | 8.51E-03 | 1.60E-01 | -0.90 | -0.43 |
| <i>lpg2756</i> | recombinational DNA repair protein RecR                           | <i>recR</i>  | Replication and Repair                    | 11.921 | 10.751 | 10.776 | 11.098 | 9.20E-03 | 5.84E-01 | -1.17 | 0.32  |
| <i>lpg2756</i> | recombinational DNA repair protein RecR                           | <i>recR</i>  | Replication and Repair                    | 11.887 | 10.664 | 10.602 | 11.224 | 7.13E-03 | 4.54E-01 | -1.22 | 0.62  |
| <i>lpg2757</i> | hypothetical protein                                              |              | Unknown / hypothetical proteins           | 9.139  | 9.330  | 9.819  | 9.305  | 7.24E-01 | 8.12E-02 | 0.19  | -0.51 |
| <i>lpg2757</i> | hypothetical protein                                              |              | Unknown / hypothetical proteins           | 8.633  | 9.191  | 9.538  | 9.450  | 2.26E-01 | 8.10E-01 | 0.56  | -0.09 |
| <i>lpg2758</i> | hypothetical protein                                              |              | Unknown / hypothetical proteins           | 8.772  | 8.209  | 8.676  | 7.623  | 3.32E-01 | 2.93E-01 | -0.56 | -1.05 |
| <i>lpg2758</i> | hypothetical protein                                              |              | Unknown / hypothetical proteins           | 9.334  | 8.377  | 8.837  | 8.551  | 1.25E-01 | 8.48E-02 | -0.96 | 2.71  |
| <i>lpg2759</i> | ORF                                                               |              | ORFs of unknown function (unique)         | 8.680  | 9.412  | 8.619  | 8.435  | 6.88E-02 | 6.13E-01 | 0.73  | -0.18 |
| <i>lpg2759</i> | ORF                                                               |              | ORFs of unknown function (unique)         | 7.470  | 8.837  | 8.827  | 8.953  | 7.36E-02 | 7.78E-01 | 1.37  | 0.13  |
| <i>lpg2760</i> | DNA-binding response regulator (two component response regulator) |              | Signal transduction / other regulatory f  | 11.749 | 11.957 | 11.101 | 10.529 | 4.48E-01 | 2.26E-01 | 0.21  | -0.57 |
| <i>lpg2760</i> | DNA-binding response regulator (two component response regulator) |              | Signal transduction / other regulatory f  | 11.739 | 12.035 | 11.192 | 10.706 | 2.36E-01 | 1.66E-01 | 0.30  | -0.49 |
| <i>lpg2761</i> | ORF                                                               |              | ORFs of unknown function (unique)         | 11.674 | 14.606 | 14.025 | 10.892 | 5.60E-03 | 6.87E-03 | 2.93  | -3.13 |
| <i>lpg2761</i> | ORF                                                               |              | ORFs of unknown function (unique)         | 11.820 | 14.556 | 13.681 | 11.258 | 7.11E-03 | 2.93E-02 | 2.74  | -2.42 |
| <i>lpg2762</i> | ORF                                                               |              | ORFs of unknown function (unique)         | 9.359  | 9.977  | 9.162  | 7.870  | 2.07E-02 | 1.92E-01 | 0.62  | -1.29 |
| <i>lpg2762</i> | ORF                                                               |              | ORFs of unknown function (unique)         | 9.584  | 10.119 | 9.170  | 8.187  | 1.65E-01 | 1.50E-01 | 0.53  | -0.98 |
| <i>lpg2763</i> | Mg2+ and Co2+ transporter CorB, hemolysin                         |              | Transport and binding, Toxin productio    | 11.339 | 11.325 | 12.455 | 11.530 | 9.61E-01 | 5.45E-03 | -0.01 | -0.92 |
| <i>lpg2763</i> | Mg2+ and Co2+ transporter CorB, hemolysin                         |              | Transport and binding, Toxin productio    | 10.622 | 10.803 | 11.719 | 11.253 | 5.61E-01 | 2.04E-01 | 0.18  | -0.47 |
| <i>lpg2764</i> | inorganic pyrophosphatase                                         | <i>ppa</i>   | Named proteins of general function        | 12.403 | 12.922 | 9.396  | 12.440 | 5.22E-01 | 4.82E-03 | 0.52  | 3.04  |
| <i>lpg2764</i> | inorganic pyrophosphatase                                         | <i>ppa</i>   | Named proteins of general function        | 12.641 | 12.977 | 9.149  | 12.457 | 5.42E-01 | 1.03E-02 | 0.34  | 3.31  |
| <i>lpg2765</i> | HIT family hydrolase (e.g., diadenosine tetraphosphate h          | <i>hit</i>   | Protein fate / hydrolases / secretion, Ti | 12.489 | 12.643 | 10.330 | 13.540 | 6.27E-01 | 1.42E-04 | 0.15  | 3.21  |
| <i>lpg2765</i> | HIT family hydrolase (e.g., diadenosine tetraphosphate h          | <i>hit</i>   | Protein fate / hydrolases / secretion, Ti | 12.297 | 12.566 | 10.213 | 13.480 | 5.19E-01 | 2.35E-04 | 0.27  | 3.27  |
| <i>lpg2766</i> | GTP cyclohydrolase I                                              | <i>folE2</i> | Metabolism of Cofactors and Vitamins      | 11.267 | 11.644 | 9.715  | 11.962 | 6.48E-01 | 1.20E-02 | 0.38  | 2.25  |
| <i>lpg2766</i> | GTP cyclohydrolase I                                              | <i>folE2</i> | Metabolism of Cofactors and Vitamins      | 11.682 | 11.628 | 9.723  | 12.366 | 9.13E-01 | 1.24E-02 | -0.05 | 2.64  |
| <i>lpg2767</i> | L-sorbose dehydrogenase (membrane bound dehydrogenase oxid        |              | Carbohydrate Metabolism, Lipid Metab      | 9.571  | 9.009  | 9.454  | 9.035  | 1.50E-01 | 4.71E-01 | -0.56 | -0.42 |
| <i>lpg2767</i> | L-sorbose dehydrogenase (membrane bound dehydrogenase oxid        |              | Carbohydrate Metabolism, Lipid Metab      | 9.816  | 9.151  | 8.809  | 9.150  | 9.88E-02 | 7.07E-01 | -0.67 | 0.34  |
| <i>lpg2768</i> | polyribonucleotide nucleotidyltransferase (polynucleotide         | <i>PNP</i>   | Nucleotide Metabolism                     | 13.287 | 11.053 | 10.194 | 13.933 | 2.49E-02 | 1.14E-03 | -2.23 | 3.74  |
| <i>lpg2768</i> | polyribonucleotide nucleotidyltransferase (polynucleotide         | <i>PNP</i>   | Nucleotide Metabolism                     | 13.187 | 11.106 | 9.987  | 13.851 | 2.30E-02 | 9.81E-04 | -2.08 | 3.86  |
| <i>lpg2769</i> | 30S ribosomal protein S15 (S15/S13E)                              | <i>rpsO</i>  | Translation                               | 13.509 | 11.369 | 10.157 | 12.961 | 3.13E-02 | 4.59E-02 | -2.14 | 2.80  |
| <i>lpg2769</i> | 30S ribosomal protein S15 (S15/S13E)                              | <i>rpsO</i>  | Translation                               | 13.689 | 11.426 | 8.839  | 13.351 | 3.07E-02 | 2.03E-02 | -2.26 | 4.51  |
| <i>lpg2770</i> | tRNA pseudouridine synthase B                                     |              | DNA/RNA degradation / restriction, Trz    | 10.694 | 9.135  | 10.780 | 9.859  | 3.34E-04 | 1.28E-01 | -1.56 | -0.92 |
| <i>lpg2770</i> | tRNA pseudouridine synthase B                                     |              | DNA/RNA degradation / restriction, Trz    | 10.834 | 8.690  | 9.908  | 10.310 | 1.22E-03 | 3.26E-01 | -2.14 | 0.40  |
| <i>lpg2771</i> | ribosome binding factor A                                         | <i>rbfA</i>  | Translation                               | 12.482 | 9.662  | 8.689  | 11.740 | 1.02E-02 | 1.94E-02 | -2.82 | 3.05  |
| <i>lpg2771</i> | ribosome binding factor A                                         | <i>rbfA</i>  | Translation                               | 12.339 | 9.958  | 8.860  | 11.927 | 3.25E-02 | 1.15E-02 | -2.38 | 3.07  |
| <i>lpg2772</i> | initiation factor IF2-beta (IF-2 gamma, IF-2 alpha)               | <i>infB</i>  | Translation                               | 12.537 | 11.361 | 12.281 | 12.144 | 2.36E-02 | 5.16E-01 | -1.18 | -0.14 |
| <i>lpg2772</i> | initiation factor IF2-beta (IF-2 gamma, IF-2 alpha)               | <i>infB</i>  | Translation                               | 12.727 | 11.298 | 12.248 | 12.229 | 4.85E-04 | 9.20E-01 | -1.43 | -0.02 |
| <i>lpg2773</i> | N utilization substance protein A (transcription pausing L        | <i>nusA</i>  | Protein fate / hydrolases / secretion, Ti | 11.536 | 11.320 | 9.563  | 11.628 | 8.21E-01 | 1.96E-02 | -1.22 | 2.06  |
| <i>lpg2773</i> | N utilization substance protein A (transcription pausing L        | <i>nusA</i>  | Protein fate / hydrolases / secretion, Ti | 11.624 | 11.499 | 9.409  | 11.507 | 8.74E-01 | 1.13E-02 | -0.12 | 2.10  |
| <i>lpg2774</i> | hypothetical COG 0779                                             |              | Unknown / hypothetical proteins           | 12.842 | 11.078 | 10.995 | 12.899 | 1.77E-03 | 7.04E-03 | -1.76 | 1.90  |
| <i>lpg2774</i> | hypothetical COG 0779                                             |              | Unknown / hypothetical proteins           | 12.664 | 10.918 | 10.954 | 12.880 | 1.78E-02 | 5.25E-03 | -1.75 | 1.93  |
| <i>lpg2775</i> | tRNA-Met                                                          |              | tRNA                                      | 11.295 | 9.306  | 11.266 | 9.751  | 5.01E-02 | 1.42E-02 | -1.99 | -1.52 |
| <i>lpg2775</i> | tRNA-Met                                                          |              | tRNA                                      | 11.561 | 9.817  | 11.372 | 11.053 | 4.08E-02 | 7.63E-01 | -1.74 | -0.32 |
| <i>lpg2776</i> | NADH dehydrogenase I, N subunit                                   | <i>nuoN</i>  | Metabolism of Cofactors and Vitamins      | 12.459 | 10.601 | 10.843 | 11.879 | 1.45E-02 | 3.98E-02 | -1.86 | 1.04  |
| <i>lpg2776</i> | NADH dehydrogenase I, N subunit                                   | <i>nuoN</i>  | Metabolism of Cofactors and Vitamins      | 12.476 | 10.776 | 10.854 | 11.968 | 1.76E-02 | 3.34E-02 | -1.70 | 1.11  |
| <i>lpg2777</i> | NADH dehydrogenase I, M subunit                                   | <i>nuoM</i>  | Metabolism of Cofactors and Vitamins      | 13.193 | 11.750 | 11.731 | 12.484 | 3.78E-05 | 6.50E-02 | -1.44 | 0.75  |
| <i>lpg2777</i> | NADH dehydrogenase I, M subunit                                   | <i>nuoM</i>  | Metabolism of Cofactors and Vitamins      | 13.179 | 11.763 | 11.742 | 12.543 | 3.35E-04 | 6.91E-02 | -1.42 | 0.80  |

|                |                                                                |                  |                                          |        |        |        |        |          |          |       |       |
|----------------|----------------------------------------------------------------|------------------|------------------------------------------|--------|--------|--------|--------|----------|----------|-------|-------|
| <i>lpg2778</i> | NADH dehydrogenase I, L subunit (NADH-ubiquinone ox            | <i>nuoL</i>      | Metabolism of Cofactors and Vitamins     | 12.621 | 10.952 | 10.101 | 10.856 | 6.60E-04 | 5.69E-01 | -1.67 | 0.76  |
| <i>lpg2778</i> | NADH dehydrogenase I, L subunit (NADH-ubiquinone ox            | <i>nuoL</i>      | Metabolism of Cofactors and Vitamins     | 12.683 | 10.673 | 10.526 | 11.590 | 3.33E-03 | 2.69E-01 | -2.01 | 1.06  |
| <i>lpg2779</i> | NADH dehydrogenase I, K subunit (NADH-ubiquinone ox            | <i>nuoK</i>      | Metabolism of Cofactors and Vitamins     | 11.941 | 9.587  | 10.346 | 10.788 | 1.07E-02 | 4.64E-01 | -2.35 | 0.44  |
| <i>lpg2779</i> | NADH dehydrogenase I, K subunit (NADH-ubiquinone ox            | <i>nuoK</i>      | Metabolism of Cofactors and Vitamins     | 11.869 | 9.642  | 9.955  | 10.859 | 1.49E-02 | 2.10E-01 | -2.23 | 0.90  |
| <i>lpg2780</i> | NADH dehydrogenase I, J subunit (NADH-ubiquinone/plc           | <i>nuoJ+G563</i> | Metabolism of Cofactors and Vitamins     | 12.080 | 10.546 | 10.543 | 10.969 | 7.56E-02 | 5.29E-01 | -1.53 | 0.43  |
| <i>lpg2780</i> | NADH dehydrogenase I, J subunit (NADH-ubiquinone/plc           | <i>nuoJ+G563</i> | Metabolism of Cofactors and Vitamins     | 12.074 | 11.224 | 10.532 | 11.790 | 1.03E-01 | 2.89E-02 | -0.85 | 1.26  |
| <i>lpg2781</i> | NADH dehydrogenase I, I subunit (NADH-ubiquinone ox            | <i>nuoI</i>      | Metabolism of Cofactors and Vitamins     | 12.178 | 10.217 | 10.444 | 10.862 | 2.31E-03 | 4.41E-01 | -1.96 | 0.42  |
| <i>lpg2781</i> | NADH dehydrogenase I, I subunit (NADH-ubiquinone ox            | <i>nuoI</i>      | Metabolism of Cofactors and Vitamins     | 11.924 | 10.644 | 10.040 | 11.428 | 6.07E-02 | 4.65E-02 | -1.28 | 1.39  |
| <i>lpg2782</i> | NADH dehydrogenase I, H subunit (NADH-ubiquinone ox            | <i>nuoH</i>      | Metabolism of Cofactors and Vitamins     | 12.966 | 11.869 | 10.661 | 12.261 | 4.37E-02 | 2.91E-02 | -1.10 | 1.60  |
| <i>lpg2782</i> | NADH dehydrogenase I, H subunit (NADH-ubiquinone ox            | <i>nuoH</i>      | Metabolism of Cofactors and Vitamins     | 12.636 | 11.788 | 10.492 | 12.211 | 2.73E-01 | 2.13E-02 | -0.85 | 1.72  |
| <i>lpg2783</i> | NADH dehydrogenase I, G subunit (ferredoxin:prokaryoti         | <i>nuoG</i>      | Metabolism of Cofactors and Vitamins     | 13.864 | 12.888 | 12.080 | 12.932 | 1.83E-01 | 4.28E-01 | -0.98 | 0.85  |
| <i>lpg2783</i> | NADH dehydrogenase I, G subunit (ferredoxin:prokaryoti         | <i>nuoG</i>      | Metabolism of Cofactors and Vitamins     | 13.858 | 12.749 | 12.132 | 13.289 | 1.83E-01 | 1.20E-01 | -1.11 | 1.16  |
| <i>lpg2784</i> | NADH dehydrogenase I, F subunit (respiratory chain NAI         | <i>nuoF</i>      | Metabolism of Cofactors and Vitamins     | 13.606 | 12.912 | 13.544 | 13.322 | 5.32E-02 | 2.77E-01 | -0.69 | -0.22 |
| <i>lpg2784</i> | NADH dehydrogenase I, F subunit (respiratory chain NAI         | <i>nuoF</i>      | Metabolism of Cofactors and Vitamins     | 13.594 | 12.844 | 13.487 | 13.302 | 5.38E-02 | 3.67E-01 | -0.75 | -0.18 |
| <i>lpg2785</i> | NADH dehydrogenase I, E subunit (ubiquinone) flavoprotein      | 2, 24 kD         | Metabolism of Cofactors and Vitamins     | 12.190 | 10.776 | 10.341 | 10.972 | 1.09E-02 | 5.24E-01 | -1.41 | 0.63  |
| <i>lpg2785</i> | NADH dehydrogenase I, E subunit (ubiquinone) flavoprotein      | 2, 24 kD         | Metabolism of Cofactors and Vitamins     | 12.118 | 10.847 | 10.236 | 11.175 | 2.82E-02 | 2.66E-01 | -1.27 | 0.94  |
| <i>lpg2786</i> | NADH dehydrogenase I, D subunit (NADH-ubiquinone ox            | <i>nuoD</i>      | Metabolism of Cofactors and Vitamins     | 13.466 | 12.857 | 10.732 | 13.038 | 2.85E-01 | 2.19E-03 | -0.61 | 2.31  |
| <i>lpg2786</i> | NADH dehydrogenase I, D subunit (NADH-ubiquinone ox            | <i>nuoD</i>      | Metabolism of Cofactors and Vitamins     | 13.478 | 12.824 | 10.590 | 13.037 | 2.29E-01 | 1.84E-03 | -0.65 | 2.45  |
| <i>lpg2787</i> | NADH dehydrogenase I, C subunit (NADH-ubiquinone ox            | <i>nuoC</i>      | Metabolism of Cofactors and Vitamins     | 13.756 | 12.260 | 12.420 | 11.892 | 9.83E-02 | 7.01E-01 | -1.50 | -0.53 |
| <i>lpg2787</i> | NADH dehydrogenase I, C subunit (NADH-ubiquinone ox            | <i>nuoC</i>      | Metabolism of Cofactors and Vitamins     | 13.808 | 12.505 | 12.423 | 12.225 | 7.48E-02 | 8.40E-01 | -1.30 | -0.20 |
| <i>lpg2788</i> | NADH dehydrogenase I, B subunit (NADH-ubiquinone ox            | <i>nuoB2</i>     | Metabolism of Cofactors and Vitamins     | 13.564 | 13.106 | 12.008 | 13.144 | 1.74E-01 | 4.42E-02 | -0.46 | 1.14  |
| <i>lpg2788</i> | NADH dehydrogenase I, B subunit (NADH-ubiquinone ox            | <i>nuoB2</i>     | Metabolism of Cofactors and Vitamins     | 13.424 | 13.011 | 11.897 | 13.106 | 3.02E-01 | 4.10E-02 | -0.41 | 1.21  |
| <i>lpg2789</i> | NADH dehydrogenase I, A subunit (NADH-ubiquinone/plc           | <i>nuoA</i>      | Metabolism of Cofactors and Vitamins     | 11.734 | 11.387 | 9.978  | 11.355 | 3.63E-01 | 1.02E-02 | -0.35 | 1.38  |
| <i>lpg2789</i> | NADH dehydrogenase I, A subunit (NADH-ubiquinone/plc           | <i>nuoA</i>      | Metabolism of Cofactors and Vitamins     | 11.721 | 11.328 | 10.017 | 11.448 | 3.87E-01 | 8.43E-03 | -0.39 | 1.43  |
| <i>lpg2790</i> | tRNA-Leu                                                       |                  | tRNA                                     | 10.988 | 10.670 | 11.728 | 10.804 | 6.16E-01 | 3.59E-02 | -0.32 | -0.92 |
| <i>lpg2790</i> | tRNA-Leu                                                       |                  | tRNA                                     | 11.333 | 10.662 | 11.607 | 10.783 | 1.63E-01 | 5.17E-02 | -0.67 | -0.82 |
| <i>lpg2791</i> | preprotein translocase, SecG subunit                           | <i>secG</i>      | Protein fate / hydrolases / secretion    | 12.823 | 12.477 | 11.157 | 12.654 | 6.06E-01 | 4.91E-03 | -0.35 | 1.50  |
| <i>lpg2791</i> | preprotein translocase, SecG subunit                           | <i>secG</i>      | Protein fate / hydrolases / secretion    | 12.071 | 12.378 | 11.036 | 12.639 | 8.33E-01 | 4.36E-03 | 0.31  | 1.60  |
| <i>lpg2792</i> | triosephosphate isomerase (TIM)                                | <i>tpiA</i>      | Carbohydrate Metabolism, Metabolism      | 11.972 | 13.017 | 9.817  | 13.385 | 1.18E-01 | 6.30E-05 | 1.04  | 3.57  |
| <i>lpg2792</i> | triosephosphate isomerase (TIM)                                | <i>tpiA</i>      | Carbohydrate Metabolism, Metabolism      | 12.587 | 13.001 | 9.495  | 13.390 | 5.88E-02 | 1.37E-04 | 0.41  | 3.90  |
| <i>lpg2793</i> | LepA, interaptin                                               | <i>lepA</i>      | Named proteins of general function       | 12.566 | 14.607 | 13.155 | 12.349 | 2.35E-05 | 5.29E-03 | 2.04  | -0.81 |
| <i>lpg2793</i> | LepA, interaptin                                               | <i>lepA</i>      | Named proteins of general function       | 12.588 | 14.687 | 13.203 | 12.457 | 1.68E-05 | 3.42E-03 | 2.10  | -0.75 |
| <i>lpg2794</i> | phosphoglucosyltransferase/phosphomannosyltransferase          | <i>mrsA</i>      | Carbohydrate Metabolism, Biosynthesis    | 12.867 | 11.510 | 12.985 | 12.703 | 2.15E-04 | 4.74E-02 | -1.36 | -0.28 |
| <i>lpg2794</i> | phosphoglucosyltransferase/phosphomannosyltransferase          | <i>mrsA</i>      | Carbohydrate Metabolism, Biosynthesis    | 12.867 | 11.529 | 12.989 | 12.730 | 2.68E-04 | 8.62E-02 | -1.34 | -0.26 |
| <i>lpg2795</i> | 7,8-dihydropterolate synthase                                  |                  | Metabolism of Cofactors and Vitamins     | 11.888 | 9.384  | 10.312 | 10.092 | 2.58E-02 | 7.88E-01 | -2.50 | -0.22 |
| <i>lpg2795</i> | 7,8-dihydropterolate synthase                                  |                  | Metabolism of Cofactors and Vitamins     | 11.762 | 9.115  | 10.083 | 9.883  | 2.87E-04 | 7.08E-01 | -2.65 | -0.20 |
| <i>lpg2796</i> | cell division protein FtsH (ATP dependent zinc protease)       | <i>ftsH</i>      | Protein fate / hydrolases / secretion, C | 12.421 | 11.732 | 12.712 | 12.043 | 7.48E-03 | 1.05E-02 | -0.69 | -0.67 |
| <i>lpg2796</i> | cell division protein FtsH (ATP dependent zinc protease)       | <i>ftsH</i>      | Protein fate / hydrolases / secretion, C | 12.429 | 11.819 | 12.701 | 12.077 | 2.85E-02 | 1.38E-02 | -0.61 | -0.62 |
| <i>lpg2797</i> | ribosomal RNA large subunit methyltransferase J (cell division |                  | Protein fate / hydrolases / secretion, C | 9.522  | 10.854 | 9.451  | 10.629 | 6.41E-04 | 9.61E-04 | 1.33  | 1.18  |
| <i>lpg2797</i> | ribosomal RNA large subunit methyltransferase J (cell division |                  | Protein fate / hydrolases / secretion, C | 10.299 | 11.689 | 9.927  | 11.959 | 4.06E-02 | 1.87E-02 | 1.39  | 2.03  |
| <i>lpg2798</i> | RNA-binding protein containing KH domain COG1534, putative     |                  | Named proteins of general function       | 9.978  | 9.281  | 8.143  | 9.706  | 3.48E-01 | 1.28E-01 | -0.70 | 1.56  |
| <i>lpg2798</i> | RNA-binding protein containing KH domain COG1534, putative     |                  | Named proteins of general function       | 10.119 | 10.300 | 8.487  | 10.185 | 7.17E-01 | 3.98E-02 | 0.18  | 1.70  |
| <i>lpg2799</i> | O-acetyltransferase (O-antigen acetylase) (lipopolysaccharide  |                  | Metabolism of Complex Lipids             | 10.141 | 8.812  | 9.387  | 9.960  | 1.38E-02 | 4.42E-01 | -1.33 | 0.57  |
| <i>lpg2799</i> | O-acetyltransferase (O-antigen acetylase) (lipopolysaccharide  |                  | Metabolism of Complex Lipids             | 10.189 | 9.121  | 9.150  | 9.935  | 4.96E-02 | 2.78E-01 | -1.07 | 0.78  |
| <i>lpg2800</i> | FrgA (siderophore biosynthetic protein, iron repressed         | <i>frgA</i>      | Toxin production / other pathogen func   | 10.062 | 9.929  | 10.206 | 10.444 | 8.35E-01 | 5.04E-01 | -0.13 | 0.24  |
| <i>lpg2800</i> | FrgA (siderophore biosynthetic protein, iron repressed         | <i>frgA</i>      | Toxin production / other pathogen func   | 10.230 | 10.262 | 10.148 | 10.527 | 9.58E-01 | 4.00E-01 | 0.03  | 0.38  |
| <i>lpg2801</i> | phosphatidylglycerophosphate synthase (CDP-diacylglycerol      |                  | Metabolism of Complex Lipids             | 11.191 | 10.458 | 11.127 | 11.077 | 2.18E-01 | 7.99E-01 | -0.73 | -0.05 |
| <i>lpg2801</i> | phosphatidylglycerophosphate synthase (CDP-diacylglycerol      |                  | Metabolism of Complex Lipids             | 10.826 | 10.635 | 10.163 | 10.938 | 6.62E-01 | 2.05E-01 | -0.19 | 0.78  |
| <i>lpg2802</i> | DnaA-like family protein (chromosomal replication initiation)  |                  | Replication and Repair                   | 11.217 | 10.176 | 9.666  | 11.219 | 1.25E-02 | 5.07E-03 | -1.04 | 1.55  |
| <i>lpg2802</i> | DnaA-like family protein (chromosomal replication initiation)  |                  | Replication and Repair                   | 11.204 | 10.234 | 9.484  | 11.124 | 3.85E-02 | 1.47E-02 | -0.97 | 1.64  |
| <i>lpg2803</i> | ORF                                                            |                  | ORFs of unknown function (unique)        | 10.474 | 8.854  | 13.763 | 8.627  | 1.42E-01 | 2.57E-03 | -1.62 | -5.14 |
| <i>lpg2803</i> | ORF                                                            |                  | ORFs of unknown function (unique)        | 10.403 | 7.894  | 13.750 | 9.216  | 9.03E-02 | 1.93E-03 | -2.51 | -4.53 |
| <i>lpg2804</i> | ORF                                                            |                  | ORFs of unknown function (unique)        | 11.431 | 10.999 | 12.321 | 10.805 | 3.85E-01 | 1.85E-02 | -0.43 | -1.52 |
| <i>lpg2804</i> | ORF                                                            |                  | ORFs of unknown function (unique)        | 11.380 | 11.257 | 12.314 | 10.866 | 7.62E-01 | 1.43E-02 | -0.12 | -1.45 |
| <i>lpg2805</i> | peptide transport protein (proton dependent peptide trans      | <i>yhiP</i>      | Transport and binding                    | 13.069 | 12.266 | 11.849 | 10.814 | 1.06E-02 | 2.49E-03 | -0.80 | -1.04 |
| <i>lpg2805</i> | peptide transport protein (proton dependent peptide trans      | <i>yhiP</i>      | Transport and binding                    | 13.054 | 12.247 | 11.849 | 10.888 | 1.13E-02 | 4.30E-04 | -0.81 | -0.96 |
| <i>lpg2806</i> | ORF                                                            |                  | ORFs of unknown function (unique)        | 9.475  | 10.239 | 10.510 | 9.810  | 3.23E-01 | 4.76E-01 | 0.76  | -0.70 |
| <i>lpg2806</i> | ORF                                                            |                  | ORFs of unknown function (unique)        | 9.249  | 10.002 | 10.150 | 9.592  | 3.57E-01 | 6.25E-01 | 0.75  | -0.56 |
| <i>lpg2807</i> | patatin family protein (lipid acyl hydrolase?)                 |                  | Protein fate / hydrolases / secretion    | 12.257 | 11.605 | 12.991 | 11.984 | 1.42E-02 | 4.16E-03 | -0.65 | -1.01 |
| <i>lpg2807</i> | patatin family protein (lipid acyl hydrolase?)                 |                  | Protein fate / hydrolases / secretion    | 12.242 | 11.361 | 13.010 | 12.079 | 2.54E-02 | 1.99E-03 | -0.88 | -0.93 |
| <i>lpg2808</i> | shikimate-5-dehydrogenase                                      | <i>aroE</i>      | Amino Acid Metabolism                    | 12.081 | 11.886 | 13.030 | 11.984 | 7.35E-01 | 1.03E-01 | -0.19 | -1.05 |
| <i>lpg2808</i> | shikimate-5-dehydrogenase                                      | <i>aroE</i>      | Amino Acid Metabolism                    | 11.925 | 11.997 | 13.023 | 12.122 | 8.91E-01 | 1.44E-01 | 0.07  | -0.90 |
| <i>lpg2809</i> | aminopeptidase N                                               | <i>pepN</i>      | Metabolism of Other Amino Acids          | 11.938 | 12.729 | 11.119 | 12.998 | 5.04E-04 | 7.64E-05 | 0.79  | 1.88  |
| <i>lpg2809</i> | aminopeptidase N                                               | <i>pepN</i>      | Metabolism of Other Amino Acids          | 11.703 | 12.780 | 10.813 | 13.033 | 2.59E-03 | 9.70E-05 | 1.08  | 2.22  |

|                |                                                                           |              |                                           |        |        |        |        |          |          |       |       |
|----------------|---------------------------------------------------------------------------|--------------|-------------------------------------------|--------|--------|--------|--------|----------|----------|-------|-------|
| <i>lpg2810</i> | serine protein kinase                                                     | <i>prkA</i>  | Amino Acid Metabolism                     | 12.575 | 13.415 | 14.000 | 12.866 | 6.47E-04 | 7.17E-03 | 0.84  | -1.13 |
| <i>lpg2810</i> | serine protein kinase                                                     | <i>prkA</i>  | Amino Acid Metabolism                     | 12.606 | 13.407 | 13.979 | 12.889 | 1.74E-03 | 8.57E-03 | 0.80  | -1.09 |
| <i>lpg2811</i> | hypothetical (glycosyltransferase?)                                       |              | Unknown / hypothetical proteins           | 11.601 | 10.727 | 12.073 | 10.909 | 1.89E-03 | 1.65E-04 | -0.87 | -1.16 |
| <i>lpg2811</i> | hypothetical (glycosyltransferase?)                                       |              | Unknown / hypothetical proteins           | 11.715 | 10.835 | 11.993 | 11.037 | 7.22E-03 | 2.37E-04 | -0.88 | -0.96 |
| <i>lpg2812</i> | sporulation protein (stage V sporulation protein, SpoVR like family prc   |              | Chemotaxis / motility / cell division     | 11.756 | 10.791 | 12.826 | 11.267 | 2.11E-02 | 2.11E-05 | -0.97 | -1.56 |
| <i>lpg2812</i> | sporulation protein (stage V sporulation protein, SpoVR like family prc   |              | Chemotaxis / motility / cell division     | 11.840 | 10.865 | 12.845 | 11.332 | 3.69E-02 | 1.15E-05 | -0.97 | -1.51 |
| <i>lpg2813</i> | ORF                                                                       | <i>vipE</i>  | ORFs of unknown function (unique)         | 10.109 | 10.610 | 12.447 | 10.735 | 5.87E-01 | 9.09E-02 | 0.50  | -1.71 |
| <i>lpg2813</i> | ORF                                                                       | <i>vipE</i>  | ORFs of unknown function (unique)         | 9.976  | 10.727 | 12.048 | 10.803 | 4.28E-01 | 3.21E-01 | 0.75  | -1.25 |
| <i>lpg2814</i> | aminopeptidase (leucine aminopeptidase)                                   |              | Amino Acid Metabolism                     | 13.456 | 12.496 | 11.515 | 11.911 | 2.22E-01 | 6.54E-01 | -0.96 | 0.40  |
| <i>lpg2814</i> | aminopeptidase (leucine aminopeptidase)                                   |              | Amino Acid Metabolism                     | 13.530 | 13.148 | 11.493 | 12.587 | 2.81E-01 | 1.40E-02 | -0.38 | 1.09  |
| <i>lpg2815</i> | ORF                                                                       |              | ORFs of unknown function (unique)         | 9.909  | 10.692 | 9.082  | 11.312 | 1.64E-02 | 7.51E-04 | 0.78  | 2.23  |
| <i>lpg2815</i> | ORF                                                                       |              | ORFs of unknown function (unique)         | 10.138 | 10.796 | 8.706  | 11.376 | 1.24E-02 | 4.80E-03 | 0.66  | 2.67  |
| <i>lpg2816</i> | ATP-dependent DNA helicase Rep                                            | <i>rep</i>   | Replication and Repair                    | 10.451 | 10.197 | 11.733 | 9.938  | 7.57E-01 | 3.50E-03 | -0.25 | -1.79 |
| <i>lpg2816</i> | ATP-dependent DNA helicase Rep                                            | <i>rep</i>   | Replication and Repair                    | 10.629 | 9.252  | 10.192 | 10.384 | 9.64E-02 | 8.54E-01 | -1.38 | 0.19  |
| <i>lpg2817</i> | heat shock protein 33, redox regulated chaperonin                         | <i>yrfl</i>  | Detoxification / adaptation, Protein fate | 10.315 | 9.542  | 10.527 | 8.644  | 8.84E-02 | 7.43E-02 | -0.77 | -1.88 |
| <i>lpg2817</i> | heat shock protein 33, redox regulated chaperonin                         | <i>yrfl</i>  | Detoxification / adaptation, Protein fate | 10.291 | 9.215  | 10.428 | 9.238  | 7.75E-03 | 1.17E-01 | -1.08 | -1.19 |
| <i>lpg2818</i> | conserved hypothetical protein                                            |              | Unknown / hypothetical proteins           | 11.975 | 11.592 | 13.446 | 10.671 | 6.10E-01 | 9.38E-04 | -0.38 | -2.78 |
| <i>lpg2818</i> | conserved hypothetical protein                                            |              | Unknown / hypothetical proteins           | 11.929 | 12.235 | 13.448 | 11.514 | 2.24E-01 | 2.98E-03 | 0.31  | -1.93 |
| <i>lpg2819</i> | tyrosine phosphatase II superfamily protein (myo-inositol hexaphosph      |              | Amino Acid Metabolism, Metabolism o       | 8.440  | 8.210  | 8.685  | 9.374  | 7.22E-01 | 2.19E-01 | -0.23 | 0.69  |
| <i>lpg2819</i> | tyrosine phosphatase II superfamily protein (myo-inositol hexaphosph      |              | Amino Acid Metabolism, Metabolism o       | 8.662  | 8.457  | 8.774  | 9.654  | 6.68E-01 | 1.93E-01 | -0.21 | 0.88  |
| <i>lpg2820</i> | aldo/keto reductase (oxidoreductase)                                      |              | Named proteins of general function        | 10.063 | 9.351  | 11.927 | 8.652  | 1.76E-01 | 6.10E-03 | -0.71 | -3.27 |
| <i>lpg2820</i> | aldo/keto reductase (oxidoreductase)                                      |              | Named proteins of general function        | 9.659  | 9.561  | 11.892 | 9.808  | 8.71E-01 | 2.39E-03 | -0.10 | -2.08 |
| <i>lpg2821</i> | sugar kinase                                                              |              | Named proteins of general function        | 8.313  | 9.174  | 9.609  | 7.715  | 1.55E-01 | 1.65E-01 | 0.86  | -1.89 |
| <i>lpg2821</i> | sugar kinase                                                              |              | Named proteins of general function        | 7.954  | 8.738  | 8.689  | 8.114  | 2.34E-01 | 3.83E-01 | 0.78  | -0.58 |
| <i>lpg2822</i> | virulence regulator BipA (GTP binding protein type A) me <i>bipA</i>      |              | Toxin production / other pathogen func    | 11.245 | 11.768 | 10.628 | 12.601 | 1.04E-02 | 6.60E-05 | 0.52  | 1.97  |
| <i>lpg2822</i> | virulence regulator BipA (GTP binding protein type A) me <i>bipA</i>      |              | Toxin production / other pathogen func    | 11.175 | 11.736 | 10.547 | 12.569 | 1.96E-02 | 3.71E-05 | 0.56  | 2.02  |
| <i>lpg2823</i> | sugar kinase (inorganic polyphosphate/ATP-NAD kinase)                     |              | Metabolism of Cofactors and Vitamins      | 10.788 | 10.754 | 9.160  | 11.561 | 9.26E-01 | 2.78E-03 | -0.03 | 2.40  |
| <i>lpg2823</i> | sugar kinase (inorganic polyphosphate/ATP-NAD kinase)                     |              | Metabolism of Cofactors and Vitamins      | 10.981 | 10.682 | 9.102  | 11.630 | 5.53E-01 | 4.10E-03 | -0.30 | 2.53  |
| <i>lpg2824</i> | DNA repair protein RecN                                                   | <i>recN</i>  | Replication and Repair                    | 11.205 | 10.440 | 10.238 | 10.373 | 7.47E-02 | 7.76E-01 | -0.76 | 0.13  |
| <i>lpg2824</i> | DNA repair protein RecN                                                   | <i>recN</i>  | Replication and Repair                    | 11.115 | 9.801  | 10.226 | 10.591 | 9.15E-04 | 4.33E-01 | -1.31 | 0.37  |
| <i>lpg2825</i> | cold shock protein CspE                                                   |              | Detoxification / adaptation               | 13.687 | 12.029 | 12.052 | 11.462 | 5.51E-03 | 1.01E-01 | -1.66 | -0.59 |
| <i>lpg2825</i> | cold shock protein CspE                                                   |              | Detoxification / adaptation               | 13.758 | 12.057 | 11.908 | 11.450 | 3.00E-03 | 2.15E-01 | -1.70 | -0.46 |
| <i>lpg2826</i> | unknown                                                                   |              | Unknown / hypothetical proteins           | 8.515  | 9.048  | 9.784  | 9.142  | 3.30E-01 | 5.36E-02 | 0.53  | -0.64 |
| <i>lpg2826</i> | unknown                                                                   |              | Unknown / hypothetical proteins           | 8.688  | 9.360  | 9.413  | 9.125  | 1.05E-01 | 5.22E-01 | 0.67  | -0.29 |
| <i>lpg2827</i> | conserved hypothetical protein                                            |              | Unknown / hypothetical proteins           | 10.560 | 9.782  | 11.634 | 9.126  | 2.12E-01 | 1.12E-02 | -0.78 | -2.51 |
| <i>lpg2827</i> | conserved hypothetical protein                                            |              | Unknown / hypothetical proteins           | 10.578 | 10.521 | 11.575 | 10.282 | 9.24E-01 | 2.63E-02 | -0.06 | -1.29 |
| <i>lpg2828</i> | ORF                                                                       |              | ORFs of unknown function (unique)         | 11.223 | 12.612 | 11.318 | 9.520  | 3.89E-02 | 5.74E-02 | 1.39  | -1.80 |
| <i>lpg2828</i> | ORF                                                                       |              | ORFs of unknown function (unique)         | 11.027 | 12.456 | 11.235 | 10.291 | 3.49E-02 | 2.29E-04 | 1.43  | -0.94 |
| <i>lpg2829</i> | SidH (myosin-like protein)                                                | <i>sidH</i>  | Named proteins of general function        | 9.702  | 6.627  | 12.322 | 7.165  | 2.50E-02 | 4.51E-03 | -3.07 | -5.16 |
| <i>lpg2829</i> | SidH (myosin-like protein)                                                | <i>sidH</i>  | Named proteins of general function        | 10.403 | 9.390  | 12.298 | 9.375  | 3.75E-01 | 2.19E-02 | -1.01 | -2.92 |
| <i>lpg2830</i> | ORF                                                                       | <i>legU2</i> | ORFs of unknown function (unique)         | 10.382 | 11.307 | 10.951 | 10.367 | 2.29E-02 | 1.12E-01 | 0.93  | -0.58 |
| <i>lpg2830</i> | ORF                                                                       | <i>legU2</i> | ORFs of unknown function (unique)         | 10.438 | 11.351 | 10.964 | 10.432 | 3.18E-02 | 1.75E-01 | 0.91  | -0.53 |
| <i>lpg2831</i> | unknown                                                                   | <i>vipD</i>  | Unknown / hypothetical proteins           | 9.881  | 10.387 | 13.048 | 10.656 | 4.99E-01 | 6.37E-03 | 0.51  | -2.39 |
| <i>lpg2831</i> | unknown                                                                   | <i>vipD</i>  | Unknown / hypothetical proteins           | 9.816  | 10.127 | 12.933 | 10.626 | 6.95E-01 | 8.35E-03 | 0.31  | -2.31 |
| <i>lpg2832</i> | hypothetical                                                              |              | Unknown / hypothetical proteins           | 12.345 | 9.448  | 10.864 | 9.264  | 1.94E-02 | 3.72E-01 | -2.90 | -1.60 |
| <i>lpg2832</i> | hypothetical                                                              |              | Unknown / hypothetical proteins           | 12.256 | 8.696  | 10.708 | 9.941  | 1.29E-03 | 3.30E-01 | -3.56 | -0.77 |
| <i>lpg2833</i> | acyl-CoA thioester hydrolase                                              | <i>yciA</i>  | Protein fate / hydrolases / secretion     | 12.774 | 12.249 | 12.415 | 12.574 | 4.68E-02 | 4.56E-01 | -0.53 | 0.16  |
| <i>lpg2833</i> | acyl-CoA thioester hydrolase                                              | <i>yciA</i>  | Protein fate / hydrolases / secretion     | 12.696 | 12.199 | 12.297 | 12.576 | 8.45E-02 | 3.24E-01 | -0.50 | 0.28  |
| <i>lpg2834</i> | transcription accessory protein (S1 RNA binding domain)                   |              | Transcription                             | 12.577 | 12.177 | 12.723 | 13.317 | 2.07E-01 | 4.05E-02 | -0.40 | 0.59  |
| <i>lpg2834</i> | transcription accessory protein (S1 RNA binding domain)                   |              | Transcription                             | 12.565 | 12.266 | 12.700 | 13.497 | 2.52E-01 | 7.52E-03 | -0.30 | 0.80  |
| <i>lpg2835</i> | thiopurine S-methyltransferase                                            | <i>tpm</i>   | Nucleotide Metabolism                     | 13.230 | 12.988 | 13.284 | 13.157 | 3.42E-01 | 4.39E-01 | -0.24 | -0.13 |
| <i>lpg2835</i> | thiopurine S-methyltransferase                                            | <i>tpm</i>   | Nucleotide Metabolism                     | 13.186 | 12.968 | 13.222 | 13.168 | 3.81E-01 | 7.21E-01 | -0.22 | -0.05 |
| <i>lpg2836</i> | glucosamine-fructose-6-phosphate aminotransferase, isc <i>glmS</i>        |              | Amino Acid Metabolism, Metabolism o       | 12.846 | 13.009 | 12.944 | 13.153 | 3.10E-01 | 1.64E-01 | 0.16  | 0.21  |
| <i>lpg2836</i> | glucosamine-fructose-6-phosphate aminotransferase, isc <i>glmS</i>        |              | Amino Acid Metabolism, Metabolism o       | 12.830 | 12.970 | 12.882 | 13.142 | 3.43E-01 | 6.25E-02 | 0.14  | 0.26  |
| <i>lpg2837</i> | lysophospholipase A (GDSL-motif lipase/hydrolase?)                        |              | Protein fate / hydrolases / secretion     | 12.788 | 11.657 | 13.348 | 9.857  | 9.63E-04 | 3.21E-07 | -1.13 | -3.49 |
| <i>lpg2837</i> | lysophospholipase A (GDSL-motif lipase/hydrolase?)                        |              | Protein fate / hydrolases / secretion     | 12.757 | 11.651 | 13.354 | 10.179 | 2.25E-03 | 3.13E-07 | -1.11 | -3.18 |
| <i>lpg2838</i> | rhodanese domain protein (sulfuryltransferase), ubiquitin C-terminal      |              | Protein fate / hydrolases / secretion     | 12.713 | 12.119 | 10.666 | 12.451 | 2.95E-01 | 4.25E-03 | -0.59 | 1.79  |
| <i>lpg2838</i> | rhodanese domain protein (sulfuryltransferase), ubiquitin C-terminal      |              | Protein fate / hydrolases / secretion     | 12.643 | 12.110 | 10.363 | 12.431 | 4.15E-01 | 6.01E-03 | -0.53 | 2.07  |
| <i>lpg2839</i> | SsrA (tmRNA) binding protein (small protein B), protein q <i>smgB</i>     |              | Protein fate / hydrolases / secretion, S  | 10.886 | 9.866  | 9.049  | 11.452 | 1.45E-01 | 6.62E-04 | -1.02 | 2.40  |
| <i>lpg2839</i> | SsrA (tmRNA) binding protein (small protein B), protein q <i>smgB</i>     |              | Protein fate / hydrolases / secretion, S  | 11.087 | 10.165 | 8.815  | 11.501 | 5.45E-02 | 5.46E-04 | -0.92 | 2.69  |
| <i>lpg2840</i> | AhpC/TSA family protein (bacterioferritin comigratory protein), antioxi   |              | Detoxification / adaptation               | 12.550 | 12.742 | 11.002 | 13.031 | 7.40E-01 | 3.79E-03 | 0.19  | 2.03  |
| <i>lpg2840</i> | AhpC/TSA family protein (bacterioferritin comigratory protein), antioxi   |              | Detoxification / adaptation               | 12.615 | 13.231 | 9.980  | 13.494 | 3.90E-01 | 1.09E-02 | 0.62  | 3.51  |
| <i>lpg2841</i> | major facilitator superfamily (multi-drug resistance translocator, bicycl |              | Transport and binding, Toxin productio    | 9.249  | 8.924  | 8.185  | 8.410  | 6.17E-01 | 8.29E-01 | -0.33 | 0.22  |
| <i>lpg2841</i> | major facilitator superfamily (multi-drug resistance translocator, bicycl |              | Transport and binding, Toxin productio    | 9.589  | 9.041  | 7.751  | 8.904  | 5.13E-02 | 1.43E-01 | -0.55 | 1.15  |



|                |                                                                            |              |                                            |        |        |        |        |          |          |       |       |
|----------------|----------------------------------------------------------------------------|--------------|--------------------------------------------|--------|--------|--------|--------|----------|----------|-------|-------|
| <i>lpg2842</i> | PhoH protein (ATPase) (phosphate starvation inducible protein)             |              | Detoxification / adaptation                | 11.911 | 11.731 | 11.794 | 12.017 | 6.22E-01 | 3.61E-01 | -0.18 | 0.22  |
| <i>lpg2842</i> | PhoH protein (ATPase) (phosphate starvation inducible protein)             |              | Detoxification / adaptation                | 11.957 | 11.695 | 11.659 | 11.956 | 4.22E-01 | 2.30E-01 | -0.26 | 0.30  |
| <i>lpg2843</i> | inosine 5'-monophosphate dehydrogenase (guanosine monophospha              |              | Nucleotide Metabolism                      | 6.052  | 6.627  | 8.348  | 7.570  | 8.37E-01 | 6.81E-01 | 0.57  | -0.78 |
| <i>lpg2843</i> | inosine 5'-monophosphate dehydrogenase (guanosine monophospha              |              | Nucleotide Metabolism                      | 7.620  | 9.219  | 6.536  | 10.285 | 2.17E-01 | 1.82E-02 | 1.60  | 3.75  |
| <i>lpg2844</i> | proteophosphoglycan, membrane associated (mucin?)                          |              | Named proteins of general function         | 12.622 | 12.817 | 15.086 | 12.787 | 8.93E-01 | 3.44E-03 | 0.20  | -2.30 |
| <i>lpg2844</i> | proteophosphoglycan, membrane associated (mucin?)                          |              | Named proteins of general function         | 12.574 | 14.089 | 15.205 | 12.933 | 2.29E-02 | 1.19E-03 | 1.52  | -2.27 |
| <i>lpg2845</i> | esterase                                                                   |              | ORFs of unknown function (unique)          | 11.293 | 11.968 | 11.950 | 12.701 | 7.08E-02 | 2.33E-02 | 0.68  | 0.75  |
| <i>lpg2845</i> | esterase                                                                   |              | ORFs of unknown function (unique)          | 11.231 | 11.955 | 11.851 | 12.649 | 5.50E-02 | 3.28E-02 | 0.72  | 0.80  |
| <i>lpg2846</i> | small ORF (77aa)                                                           |              | ORFs of unknown function (unique)          | 11.529 | 10.622 | 12.280 | 10.804 | 7.38E-02 | 1.19E-03 | -0.91 | -1.48 |
| <i>lpg2846</i> | small ORF (77aa)                                                           |              | ORFs of unknown function (unique)          | 11.393 | 10.708 | 12.190 | 10.891 | 1.89E-01 | 2.74E-03 | -0.69 | -1.30 |
| <i>lpg2847</i> | hypothetical protein                                                       |              | Unknown / hypothetical proteins            | 11.880 | 12.459 | 11.762 | 12.214 | 1.38E-02 | 5.40E-02 | 0.58  | 0.45  |
| <i>lpg2847</i> | hypothetical protein                                                       |              | Unknown / hypothetical proteins            | 11.881 | 12.670 | 11.693 | 12.371 | 1.72E-04 | 1.08E-03 | 0.79  | 0.68  |
| <i>lpg2848</i> | ribonuclease (T2 family)                                                   |              | DNA/RNA degradation / restriction          | 11.493 | 10.835 | 11.086 | 9.948  | 2.20E-01 | 2.99E-04 | -0.66 | -1.14 |
| <i>lpg2848</i> | ribonuclease (T2 family)                                                   |              | DNA/RNA degradation / restriction          | 11.510 | 10.888 | 11.075 | 9.992  | 1.99E-01 | 1.23E-04 | -0.62 | -1.08 |
| <i>lpg2849</i> | hypothetical (bacteriophage glycoprotein?)                                 |              | Viral functions / Phage / Transposases     | 9.761  | 9.006  | 11.210 | 8.760  | 3.05E-02 | 4.36E-04 | -0.76 | -2.45 |
| <i>lpg2849</i> | hypothetical (bacteriophage glycoprotein?)                                 |              | Viral functions / Phage / Transposases     | 9.693  | 9.044  | 11.136 | 8.922  | 9.67E-02 | 7.47E-04 | -0.65 | -2.21 |
| <i>lpg2850</i> | cold shock transcriptional regulator CspA                                  |              | Detoxification / adaptation, Transcription | 12.020 | 11.248 | 12.696 | 10.968 | 9.73E-02 | 1.17E-06 | -0.77 | -1.73 |
| <i>lpg2850</i> | cold shock transcriptional regulator CspA                                  |              | Detoxification / adaptation, Transcription | 11.931 | 10.637 | 12.624 | 10.985 | 1.35E-03 | 8.38E-06 | -1.29 | -1.64 |
| <i>lpg2851</i> | protoporphyrinogen oxidase                                                 | <i>hemG</i>  | Named proteins of general function         | 9.237  | 7.677  | 9.417  | 8.116  | 1.93E-01 | 6.57E-02 | -1.56 | -1.30 |
| <i>lpg2851</i> | protoporphyrinogen oxidase                                                 | <i>hemG</i>  | Named proteins of general function         | 9.248  | 7.311  | 9.228  | 8.077  | 1.45E-02 | 2.64E-01 | -1.94 | -1.15 |
| <i>lpg2852</i> | amidase (6-aminohexanoate-cyclic dimer hydrolase)                          | <i>amic</i>  | Amino Acid Metabolism, Metabolism o        | 10.526 | 9.200  | 11.474 | 8.998  | 4.57E-02 | 7.93E-04 | -1.33 | -2.48 |
| <i>lpg2852</i> | amidase (6-aminohexanoate-cyclic dimer hydrolase)                          | <i>amic</i>  | Amino Acid Metabolism, Metabolism o        | 10.428 | 9.123  | 11.031 | 8.882  | 6.16E-02 | 1.10E-03 | -1.31 | -2.15 |
| <i>lpg2853</i> | hypothetical protein                                                       |              | Unknown / hypothetical proteins            | 11.084 | 10.231 | 10.121 | 10.117 | 1.59E-01 | 9.93E-01 | -0.85 | 0.00  |
| <i>lpg2853</i> | hypothetical protein                                                       |              | Unknown / hypothetical proteins            | 11.304 | 11.333 | 10.354 | 11.349 | 9.25E-01 | 1.31E-01 | 0.03  | 1.00  |
| <i>lpg2854</i> | hypothetical (major royal jelly protein 3-like), KQDN repeats              |              | Signal transduction / other regulatory f   | 8.845  | 8.330  | 9.153  | 8.785  | 7.15E-01 | 5.75E-01 | -0.51 | -0.37 |
| <i>lpg2854</i> | hypothetical (major royal jelly protein 3-like), KQDN repeats              |              | Signal transduction / other regulatory f   | 9.038  | 8.829  | 8.384  | 8.841  | 6.65E-01 | 3.59E-01 | -0.21 | 0.46  |
| <i>lpg2855</i> | TPR (repeat) domain protein, protein-protein interactions                  |              | Signal transduction / other regulatory f   | 10.910 | 8.870  | 9.073  | 9.329  | 9.02E-04 | 6.91E-01 | -2.04 | 0.26  |
| <i>lpg2855</i> | TPR (repeat) domain protein, protein-protein interactions                  |              | Signal transduction / other regulatory f   | 10.935 | 9.932  | 9.298  | 9.836  | 2.67E-01 | 4.68E-01 | -1.00 | 0.54  |
| <i>lpg2856</i> | hypothetical (von Willebrand factor type A domain protein), regulatory     |              | Signal transduction / other regulatory f   | 10.777 | 10.045 | 9.949  | 11.006 | 5.05E-02 | 3.45E-02 | -0.73 | 1.06  |
| <i>lpg2856</i> | hypothetical (von Willebrand factor type A domain protein), regulatory     |              | Signal transduction / other regulatory f   | 10.072 | 9.961  | 10.001 | 11.227 | 9.09E-01 | 7.52E-03 | -0.11 | 1.23  |
| <i>lpg2857</i> | small ORF (130aa) hypothetical                                             |              | Unknown / hypothetical proteins            | 10.474 | 8.893  | 9.637  | 9.747  | 3.70E-03 | 8.14E-01 | -1.58 | 0.11  |
| <i>lpg2857</i> | small ORF (130aa) hypothetical                                             |              | Unknown / hypothetical proteins            | 10.484 | 9.318  | 9.519  | 10.228 | 7.52E-04 | 2.69E-01 | -1.17 | 0.71  |
| <i>lpg2858</i> | conserved hypothetical protein                                             |              | Unknown / hypothetical proteins            | 12.748 | 10.014 | 10.489 | 11.263 | 1.15E-01 | 4.84E-01 | -2.73 | 0.77  |
| <i>lpg2858</i> | conserved hypothetical protein                                             |              | Unknown / hypothetical proteins            | 12.036 | 10.995 | 10.324 | 11.383 | 1.16E-01 | 5.31E-02 | -1.04 | 1.06  |
| <i>lpg2859</i> | MoxR protein (ATPase) methanol dehydrogenase regulatory protein            |              | Signal transduction / other regulatory f   | 7.417  | 8.370  | 8.446  | 6.879  | 5.21E-01 | 2.71E-02 | 0.95  | -1.57 |
| <i>lpg2859</i> | MoxR protein (ATPase) methanol dehydrogenase regulatory protein            |              | Signal transduction / other regulatory f   | 6.836  | 7.353  | 8.526  | 7.823  | 7.67E-01 | 3.92E-01 | 0.52  | -0.70 |
| <i>lpg2860</i> | small ORF (158aa)                                                          |              | ORFs of unknown function (unique)          | 11.661 | 10.759 | 10.551 | 11.260 | 8.53E-02 | 1.66E-01 | -0.90 | 0.71  |
| <i>lpg2860</i> | small ORF (158aa)                                                          |              | ORFs of unknown function (unique)          | 11.498 | 11.468 | 10.645 | 11.471 | 9.71E-01 | 1.01E-01 | -0.03 | 0.83  |
| <i>lpg2861</i> | nitrogen regulation protein (transcriptional regulator involved in nitrogr |              | Transcription factors / DNA binding prc    | 11.506 | 10.529 | 11.151 | 10.989 | 1.84E-02 | 6.19E-01 | -0.98 | -0.16 |
| <i>lpg2861</i> | nitrogen regulation protein (transcriptional regulator involved in nitrogr |              | Transcription factors / DNA binding prc    | 11.426 | 10.472 | 11.019 | 10.891 | 3.82E-03 | 6.64E-01 | -0.95 | -0.13 |
| <i>lpg2862</i> | ORF                                                                        | <i>legC8</i> | ORFs of unknown function (unique)          | 9.987  | 11.124 | 13.835 | 8.204  | 2.80E-01 | 3.44E-03 | 1.14  | -5.63 |
| <i>lpg2862</i> | ORF                                                                        | <i>legC8</i> | ORFs of unknown function (unique)          | 10.100 | 10.888 | 13.890 | 9.679  | 4.38E-01 | 5.00E-03 | 0.79  | -4.21 |
| <i>lpg2863</i> | pteridine reductase 1 (short chain dehydrogenase/reductase) (glucos        |              | Named proteins of general function         | 9.922  | 9.135  | 9.710  | 9.715  | 3.35E-02 | 9.83E-01 | -0.79 | 0.00  |
| <i>lpg2863</i> | pteridine reductase 1 (short chain dehydrogenase/reductase) (glucos        |              | Named proteins of general function         | 9.920  | 8.499  | 8.574  | 9.637  | 1.61E-02 | 2.69E-01 | -1.42 | 1.06  |
| <i>lpg2864</i> | conserved hypothetical protein                                             |              | Unknown / hypothetical proteins            | 11.069 | 11.035 | 10.190 | 12.471 | 9.19E-01 | 3.02E-03 | -0.03 | 2.28  |
| <i>lpg2864</i> | conserved hypothetical protein                                             |              | Unknown / hypothetical proteins            | 11.164 | 10.898 | 9.848  | 12.485 | 4.15E-01 | 4.62E-03 | -0.27 | 2.64  |
| <i>lpg2865</i> | 6-pyruvoyl tetrahydropterin synthase, putative                             |              | Metabolism of Cofactors and Vitamins       | 11.916 | 11.395 | 10.628 | 12.129 | 1.66E-01 | 1.22E-01 | -0.52 | 1.50  |
| <i>lpg2865</i> | 6-pyruvoyl tetrahydropterin synthase, putative                             |              | Metabolism of Cofactors and Vitamins       | 11.760 | 11.398 | 10.495 | 12.158 | 3.85E-01 | 8.74E-02 | -0.36 | 1.66  |
| <i>lpg2866</i> | primosomal protein N' (primosomal protein replication factor)              |              | Replication and Repair                     | 13.219 | 14.588 | 14.200 | 14.709 | 7.44E-03 | 1.78E-01 | 1.37  | 0.51  |
| <i>lpg2866</i> | primosomal protein N' (primosomal protein replication factor)              |              | Replication and Repair                     | 13.215 | 14.587 | 14.175 | 14.722 | 7.43E-03 | 1.45E-01 | 1.37  | 0.55  |
| <i>lpg2867</i> | COG0824 thioesterase (4-hydroxybenzoyl-CoA-thioesterase)                   |              | Biodegradation of Xenobiotics              | 12.395 | 11.761 | 11.486 | 11.238 | 2.63E-02 | 6.03E-01 | -0.63 | -0.25 |
| <i>lpg2867</i> | COG0824 thioesterase (4-hydroxybenzoyl-CoA-thioesterase)                   |              | Biodegradation of Xenobiotics              | 12.390 | 11.991 | 11.659 | 11.557 | 7.60E-02 | 7.27E-01 | -0.40 | -0.10 |
| <i>lpg2868</i> | thymidylate synthase (TS) (TSase)                                          | <i>thyA</i>  | Nucleotide Metabolism, Metabolism of       | 11.009 | 11.073 | 10.810 | 12.353 | 8.99E-01 | 1.44E-04 | 0.06  | 1.54  |
| <i>lpg2868</i> | thymidylate synthase (TS) (TSase)                                          | <i>thyA</i>  | Nucleotide Metabolism, Metabolism of       | 11.116 | 11.204 | 10.694 | 12.333 | 8.60E-01 | 2.35E-03 | 0.09  | 1.64  |
| <i>lpg2869</i> | prolipoprotein diacylglycerol transferase                                  | <i>lgt</i>   | Metabolism of Complex Lipids               | 9.968  | 8.617  | 9.324  | 9.273  | 1.22E-01 | 8.89E-01 | -1.35 | -0.05 |
| <i>lpg2869</i> | prolipoprotein diacylglycerol transferase                                  | <i>lgt</i>   | Metabolism of Complex Lipids               | 9.808  | 8.764  | 9.370  | 10.222 | 4.22E-01 | 4.68E-01 | -1.04 | 0.85  |
| <i>lpg2870</i> | hypothetical (integral membrane protein?)                                  |              | Unknown / hypothetical proteins            | 10.086 | 8.484  | 8.748  | 9.210  | 6.56E-02 | 5.80E-01 | -1.60 | 0.46  |
| <i>lpg2870</i> | hypothetical (integral membrane protein?)                                  |              | Unknown / hypothetical proteins            | 10.587 | 10.164 | 7.589  | 10.849 | 6.74E-01 | 2.84E-02 | -0.42 | 3.26  |
| <i>lpg2871</i> | phosphoenolpyruvate protein phosphotransferase PtsP                        | <i>ptsP</i>  | Transport and binding                      | 10.314 | 10.337 | 10.056 | 9.760  | 9.63E-01 | 5.72E-01 | 0.02  | -0.30 |
| <i>lpg2871</i> | phosphoenolpyruvate protein phosphotransferase PtsP                        | <i>ptsP</i>  | Transport and binding                      | 10.432 | 10.085 | 9.868  | 10.240 | 4.19E-01 | 4.36E-01 | -0.35 | 0.37  |
| <i>lpg2872</i> | (di)nucleoside polyphosphate hydrolase (MutT/nudix family protein)         |              | Metabolism of Complex Carbohydrate:        | 12.953 | 12.785 | 11.903 | 12.841 | 7.23E-01 | 9.70E-02 | -0.17 | 0.94  |
| <i>lpg2872</i> | (di)nucleoside polyphosphate hydrolase (MutT/nudix family protein)         |              | Metabolism of Complex Carbohydrate:        | 12.917 | 13.200 | 11.787 | 13.329 | 1.98E-01 | 1.32E-05 | 0.28  | 1.54  |
| <i>lpg2873</i> | L-asparaginase I (cytoplasmic)                                             |              | Amino Acid Metabolism, Metabolism o        | 7.937  | 8.160  | 9.040  | 7.981  | 8.26E-01 | 2.45E-01 | 0.22  | -1.06 |
| <i>lpg2873</i> | L-asparaginase I (cytoplasmic)                                             |              | Amino Acid Metabolism, Metabolism o        | 7.803  | 7.719  | 8.665  | 7.729  | 9.01E-01 | 4.69E-01 | -0.08 | -0.94 |

|                |                                                                            |               |                                           |        |        |        |        |          |          |       |       |
|----------------|----------------------------------------------------------------------------|---------------|-------------------------------------------|--------|--------|--------|--------|----------|----------|-------|-------|
| <i>lpg2874</i> | ORF                                                                        |               | ORFs of unknown function (unique)         | 13.439 | 14.035 | 13.319 | 12.419 | 4.74E-01 | 1.24E-01 | 0.60  | -0.90 |
| <i>lpg2874</i> | ORF                                                                        |               | ORFs of unknown function (unique)         | 13.404 | 13.888 | 13.315 | 12.422 | 5.98E-01 | 8.73E-02 | 0.48  | -0.89 |
| <i>lpg2875</i> | UDP-N-acetylglucosamine pyrophosphorylase                                  | <i>glmU</i>   | Amino Acid Metabolism, Metabolism o       | 11.771 | 12.286 | 11.074 | 12.343 | 6.59E-02 | 4.69E-03 | 0.52  | 1.27  |
| <i>lpg2875</i> | UDP-N-acetylglucosamine pyrophosphorylase                                  | <i>glmU</i>   | Amino Acid Metabolism, Metabolism o       | 11.498 | 12.241 | 10.906 | 12.242 | 1.19E-01 | 2.13E-03 | 0.74  | 1.34  |
| <i>lpg2876</i> | arsenite efflux protein (arsenite permease, arsenite transporter (ArsB)    |               | Transport and binding                     | 9.667  | 9.640  | 10.289 | 9.640  | 9.73E-01 | 5.95E-03 | -0.03 | 2.37  |
| <i>lpg2876</i> | arsenite efflux protein (arsenite permease, arsenite transporter (ArsB)    |               | Transport and binding                     | 9.937  | 9.970  | 7.941  | 10.416 | 9.44E-01 | 4.95E-03 | 0.03  | 2.47  |
| <i>lpg2877</i> | hypothetical                                                               |               | Unknown / hypothetical proteins           | 9.745  | 9.279  | 7.974  | 9.135  | 2.90E-01 | 2.40E-01 | -0.47 | 1.16  |
| <i>lpg2877</i> | hypothetical                                                               |               | Unknown / hypothetical proteins           | 9.716  | 9.304  | 7.535  | 8.914  | 4.03E-01 | 1.95E-01 | -0.41 | 1.38  |
| <i>lpg2878</i> | cobalt/magnesium uptake transporter                                        | <i>corA</i>   | Transport and binding                     | 11.165 | 11.384 | 11.061 | 11.691 | 2.02E-01 | 7.97E-02 | 0.22  | 0.63  |
| <i>lpg2878</i> | cobalt/magnesium uptake transporter                                        | <i>corA</i>   | Transport and binding                     | 11.116 | 11.342 | 11.027 | 11.720 | 2.05E-01 | 4.16E-03 | 0.23  | 0.69  |
| <i>lpg2879</i> | ORF                                                                        |               | ORFs of unknown function (unique)         | 12.177 | 13.918 | 12.402 | 11.685 | 8.57E-07 | 9.32E-04 | 1.74  | -0.72 |
| <i>lpg2879</i> | ORF                                                                        |               | ORFs of unknown function (unique)         | 12.170 | 13.920 | 12.369 | 11.656 | 1.73E-06 | 3.17E-03 | 1.75  | -0.71 |
| <i>lpg2880</i> | endonuclease III (DNA (-apurinic or -apyrimidinic site) <i>lya nth</i>     |               | DNA/RNA degradation / restriction         | 9.937  | 9.336  | 10.563 | 9.661  | 1.01E-02 | 2.26E-02 | -0.60 | -0.90 |
| <i>lpg2880</i> | endonuclease III (DNA (-apurinic or -apyrimidinic site) <i>lya nth</i>     |               | DNA/RNA degradation / restriction         | 9.815  | 9.280  | 10.572 | 9.782  | 2.73E-01 | 5.04E-02 | -0.53 | -0.79 |
| <i>lpg2881</i> | iron-sulfur cluster binding protein (4Fe-4S binding domain protein) (el)   |               | Energy Metabolism                         | 12.235 | 11.146 | 11.991 | 12.297 | 1.03E-04 | 2.87E-02 | -1.09 | 0.31  |
| <i>lpg2881</i> | iron-sulfur cluster binding protein (4Fe-4S binding domain protein) (el)   |               | Energy Metabolism                         | 12.313 | 11.423 | 12.086 | 12.419 | 9.14E-04 | 1.08E-01 | -0.89 | 0.33  |
| <i>lpg2882</i> | methionyl tRNA synthetase                                                  | <i>metG_1</i> | Amino Acid Metabolism, Metabolism o       | 11.358 | 10.730 | 10.105 | 12.253 | 2.26E-01 | 6.84E-04 | -0.63 | 2.15  |
| <i>lpg2882</i> | methionyl tRNA synthetase                                                  | <i>metG_1</i> | Amino Acid Metabolism, Metabolism o       | 11.731 | 10.843 | 9.611  | 12.335 | 8.73E-03 | 1.22E-03 | -0.89 | 2.72  |
| <i>lpg2883</i> | 3-octaprenyl-4-hydroxybenzoate carboxy-lyase (aromatic acid decarb         |               | Metabolism of Cofactors and Vitamins      | 11.211 | 11.241 | 11.632 | 11.571 | 9.17E-01 | 7.61E-01 | 0.03  | -0.06 |
| <i>lpg2883</i> | 3-octaprenyl-4-hydroxybenzoate carboxy-lyase (aromatic acid decarb         |               | Metabolism of Cofactors and Vitamins      | 11.172 | 11.413 | 11.597 | 11.674 | 2.79E-01 | 5.06E-01 | 0.24  | 0.08  |
| <i>lpg2884</i> | ORF                                                                        |               | ORFs of unknown function (unique)         | 13.808 | 13.154 | 12.083 | 12.051 | 2.53E-01 | 9.58E-01 | -0.65 | -0.03 |
| <i>lpg2884</i> | ORF                                                                        |               | ORFs of unknown function (unique)         | 13.689 | 13.370 | 12.067 | 12.327 | 6.22E-01 | 6.70E-01 | -0.32 | 0.26  |
| <i>lpg2885</i> | ORF                                                                        |               | ORFs of unknown function (unique)         | 9.508  | 10.363 | 8.880  | 9.768  | 1.28E-01 | 9.86E-02 | 0.86  | 0.89  |
| <i>lpg2885</i> | ORF                                                                        |               | ORFs of unknown function (unique)         | 9.406  | 10.659 | 8.147  | 9.909  | 3.19E-02 | 4.71E-02 | 1.25  | 1.76  |
| <i>lpg2886</i> | ExsB protein (transcriptional or post-transcriptional regulator), COG0     |               | Signal transduction / other regulatory f  | 11.589 | 12.110 | 11.157 | 11.773 | 9.30E-02 | 9.20E-02 | 0.52  | 0.62  |
| <i>lpg2886</i> | ExsB protein (transcriptional or post-transcriptional regulator), COG0     |               | Signal transduction / other regulatory f  | 11.685 | 11.970 | 11.101 | 11.800 | 1.46E-01 | 7.18E-02 | 0.28  | 0.70  |
| <i>lpg2887</i> | phosphomannose isomerase GDP mannose pyrophosph <i>rfbA</i>                |               | Carbohydrate Metabolism                   | 9.638  | 9.151  | 9.145  | 9.108  | 6.36E-02 | 8.76E-01 | -0.49 | -0.04 |
| <i>lpg2887</i> | phosphomannose isomerase GDP mannose pyrophosph <i>rfbA</i>                |               | Carbohydrate Metabolism                   | 9.729  | 9.138  | 8.939  | 8.967  | 1.13E-02 | 9.23E-01 | -0.59 | 0.03  |
| <i>lpg2888</i> | ORF                                                                        |               | ORFs of unknown function (unique)         | 10.173 | 11.250 | 11.685 | 9.174  | 4.13E-02 | 3.11E-04 | 1.08  | -2.51 |
| <i>lpg2888</i> | ORF                                                                        |               | ORFs of unknown function (unique)         | 10.231 | 11.345 | 11.573 | 9.464  | 4.23E-02 | 1.85E-03 | 1.11  | -2.11 |
| <i>lpg2889</i> | glucose inhibited division protein A                                       | <i>gidA</i>   | Chemotaxis / motility / cell division     | 10.354 | 9.886  | 10.092 | 10.341 | 2.91E-01 | 6.80E-01 | -0.47 | 0.25  |
| <i>lpg2889</i> | glucose inhibited division protein A                                       | <i>gidA</i>   | Chemotaxis / motility / cell division     | 10.277 | 11.210 | 10.337 | 10.610 | 1.14E-02 | 2.56E-01 | 0.93  | 0.27  |
| <i>lpg2890</i> | glucose inhibited division protein B                                       | <i>gidB</i>   | Chemotaxis / motility / cell division     | 12.046 | 12.352 | 10.808 | 12.474 | 5.25E-01 | 2.05E-03 | 0.31  | 1.67  |
| <i>lpg2890</i> | glucose inhibited division protein B                                       | <i>gidB</i>   | Chemotaxis / motility / cell division     | 11.910 | 12.351 | 10.702 | 12.582 | 4.50E-01 | 6.73E-04 | 0.44  | 1.88  |
| <i>lpg2891</i> | sporulation initiation inhibitor protein Soj, chromosome $\rho$ <i>soj</i> |               | Chemotaxis / motility / cell division     | 11.150 | 11.255 | 10.608 | 11.570 | 7.98E-01 | 8.68E-02 | 0.10  | 0.96  |
| <i>lpg2891</i> | sporulation initiation inhibitor protein Soj, chromosome $\rho$ <i>soj</i> |               | Chemotaxis / motility / cell division     | 11.482 | 11.226 | 10.369 | 11.671 | 3.54E-01 | 1.20E-02 | -0.26 | 1.30  |
| <i>lpg2892</i> | chromosome partitioning protein ParB                                       |               | Chemotaxis / motility / cell division, Me | 10.452 | 9.845  | 8.592  | 10.489 | 7.24E-02 | 5.86E-03 | -0.61 | 1.90  |
| <i>lpg2892</i> | chromosome partitioning protein ParB                                       |               | Chemotaxis / motility / cell division, Me | 10.536 | 10.030 | 8.562  | 10.883 | 7.00E-02 | 7.72E-03 | -0.51 | 2.32  |
| <i>lpg2893</i> | ORF                                                                        |               | ORFs of unknown function (unique)         | 9.121  | 9.999  | 9.917  | 9.209  | 2.23E-01 | 3.67E-01 | 0.88  | -0.71 |
| <i>lpg2893</i> | ORF                                                                        |               | ORFs of unknown function (unique)         | 9.222  | 9.499  | 9.712  | 9.195  | 7.00E-01 | 5.95E-01 | 0.28  | -0.52 |
| <i>lpg2894</i> | cytochrome c oxidase, subunit III                                          |               | Energy Metabolism                         | 7.313  | 6.899  | 8.239  | 7.354  | 5.14E-01 | 1.38E-01 | -0.41 | -0.88 |
| <i>lpg2894</i> | cytochrome c oxidase, subunit III                                          |               | Energy Metabolism                         | 5.492  | 7.569  | 6.590  | 8.843  | 1.62E-01 | 7.50E-02 | 2.08  | 2.25  |
| <i>lpg2895</i> | cytochrome c oxidase, assembly transmembrane protein <i>coxG</i>           |               | Energy Metabolism                         | 11.920 | 12.098 | 11.245 | 12.120 | 7.22E-01 | 4.33E-02 | 0.18  | 0.87  |
| <i>lpg2895</i> | cytochrome c oxidase, assembly transmembrane protein <i>coxG</i>           |               | Energy Metabolism                         | 11.931 | 12.108 | 11.135 | 12.170 | 7.23E-01 | 2.03E-02 | 0.18  | 1.03  |
| <i>lpg2896</i> | cytochrome c oxidase, subunit I                                            |               | Energy Metabolism                         | 12.880 | 13.205 | 12.099 | 13.411 | 6.13E-01 | 2.99E-02 | 0.33  | 1.31  |
| <i>lpg2896</i> | cytochrome c oxidase, subunit I                                            |               | Energy Metabolism                         | 12.913 | 13.890 | 12.036 | 13.942 | 1.56E-04 | 9.34E-06 | 0.98  | 1.91  |
| <i>lpg2897</i> | cytochrome c oxidase, subunit II                                           |               | Energy Metabolism                         | 8.468  | 8.410  | 9.828  | 7.796  | 9.52E-01 | 1.55E-01 | -0.06 | -2.03 |
| <i>lpg2897</i> | cytochrome c oxidase, subunit II                                           |               | Energy Metabolism                         | 7.829  | 8.358  | 8.527  | 8.421  | 2.70E-01 | 7.80E-01 | 0.53  | -0.11 |
| <i>lpg2898</i> | cytochrome c (alcohol dehydrogenase cytochrome c)                          |               | Energy Metabolism                         | 6.769  | 9.121  | 8.450  | 8.179  | 1.31E-01 | 8.21E-01 | 2.35  | -0.27 |
| <i>lpg2898</i> | cytochrome c (alcohol dehydrogenase cytochrome c)                          |               | Energy Metabolism                         | 7.086  | 9.709  | 7.634  | 8.659  | 7.59E-02 | 2.66E-01 | 2.62  | 1.03  |
| <i>lpg2899</i> | ferredoxin component COG2146, putative pseudogene                          |               | Named proteins of general function        | 10.789 | 10.949 | 10.966 | 12.218 | 4.82E-01 | 1.39E-02 | 0.16  | 1.25  |
| <i>lpg2899</i> | ferredoxin component COG2146, putative pseudogene                          |               | Named proteins of general function        | 11.166 | 10.651 | 10.787 | 12.185 | 3.75E-01 | 3.46E-02 | -0.51 | 1.40  |
| <i>lpg2900</i> | CapM protein, capsular polysaccharide biosynthesis (glyc <i>capM2</i>      |               | Cell envelope synthesis, Metabolism o     | 10.872 | 9.893  | 9.996  | 11.978 | 9.23E-02 | 1.45E-02 | -0.98 | 1.98  |
| <i>lpg2900</i> | CapM protein, capsular polysaccharide biosynthesis (glyc <i>capM2</i>      |               | Cell envelope synthesis, Metabolism o     | 10.696 | 10.460 | 9.563  | 12.383 | 6.23E-01 | 2.71E-04 | -0.24 | 2.82  |
| <i>lpg2901</i> | transporter, LysE family (amino acid transport protein)                    |               | Transport and binding                     | 9.052  | 9.637  | 9.452  | 9.052  | 8.67E-02 | 4.87E-01 | 0.59  | -0.40 |
| <i>lpg2901</i> | transporter, LysE family (amino acid transport protein)                    |               | Transport and binding                     | 9.061  | 9.834  | 9.263  | 9.205  | 3.52E-03 | 9.19E-01 | 0.77  | -0.06 |
| <i>lpg2902</i> | conserved hypothetical protein                                             |               | Unknown / hypothetical proteins           | 9.539  | 10.003 | 11.173 | 10.019 | 7.96E-02 | 1.46E-02 | 0.46  | -1.15 |
| <i>lpg2902</i> | conserved hypothetical protein                                             |               | Unknown / hypothetical proteins           | 9.425  | 10.002 | 11.152 | 10.248 | 8.20E-02 | 3.10E-02 | 0.58  | -0.90 |
| <i>lpg2903</i> | ubiquinone/menaquinone biosynthesis methyltransferase UbiE                 |               | Metabolism of Cofactors and Vitamins      | 10.913 | 10.591 | 9.269  | 10.804 | 5.72E-01 | 4.67E-02 | -0.32 | 1.53  |
| <i>lpg2903</i> | ubiquinone/menaquinone biosynthesis methyltransferase UbiE                 |               | Metabolism of Cofactors and Vitamins      | 10.824 | 10.706 | 9.345  | 10.991 | 8.68E-01 | 2.76E-02 | -0.12 | 1.65  |
| <i>lpg2904</i> | conserved hypothetical protein                                             |               | Unknown / hypothetical proteins           | 11.213 | 10.675 | 9.682  | 11.027 | 2.99E-01 | 3.47E-03 | -0.54 | 1.34  |
| <i>lpg2904</i> | conserved hypothetical protein                                             |               | Unknown / hypothetical proteins           | 11.097 | 11.079 | 9.589  | 11.008 | 9.71E-01 | 6.24E-04 | -0.02 | 1.42  |
| <i>lpg2905</i> | ubiquinone biosynthesis AarF                                               |               | Metabolism of Cofactors and Vitamins      | 9.265  | 10.273 | 9.819  | 10.623 | 2.46E-01 | 1.07E-01 | 1.01  | 0.80  |
| <i>lpg2905</i> | ubiquinone biosynthesis AarF                                               |               | Metabolism of Cofactors and Vitamins      | 8.981  | 10.192 | 9.589  | 10.404 | 9.27E-02 | 2.55E-01 | 1.21  | 0.81  |

|                |                                                                            |             |                                           |        |        |        |        |          |          |       |       |
|----------------|----------------------------------------------------------------------------|-------------|-------------------------------------------|--------|--------|--------|--------|----------|----------|-------|-------|
| <i>lpg2906</i> | sec-independent protein translocase TatB                                   | <i>tatB</i> | Protein fate / hydrolases / secretion     | 11.685 | 10.340 | 11.082 | 10.624 | 2.97E-03 | 2.78E-02 | -1.35 | -0.46 |
| <i>lpg2906</i> | sec-independent protein translocase TatB                                   | <i>tatB</i> | Protein fate / hydrolases / secretion     | 11.721 | 10.675 | 11.124 | 10.803 | 4.70E-04 | 7.88E-02 | -1.05 | -0.32 |
| <i>lpg2907</i> | ORF                                                                        |             | ORFs of unknown function (unique)         | 9.277  | 10.806 | 11.352 | 9.287  | 4.50E-04 | 4.53E-03 | 1.53  | -2.06 |
| <i>lpg2907</i> | ORF                                                                        |             | ORFs of unknown function (unique)         | 9.423  | 10.722 | 11.344 | 9.752  | 2.02E-05 | 2.25E-03 | 1.30  | -1.59 |
| <i>lpg2908</i> | peptide methionine sulfoxide reductase (protein methioni                   | <i>msrA</i> | Detoxification / adaptation               | 11.733 | 12.213 | 13.341 | 11.946 | 3.71E-01 | 2.16E-02 | 0.48  | -1.40 |
| <i>lpg2908</i> | peptide methionine sulfoxide reductase (protein methioni                   | <i>msrA</i> | Detoxification / adaptation               | 11.648 | 12.171 | 13.354 | 12.054 | 3.69E-01 | 3.22E-02 | 0.52  | -1.30 |
| <i>lpg2909</i> | 62aa ORF hypothetical                                                      |             | Unknown / hypothetical proteins           | 9.686  | 9.593  | 10.924 | 9.322  | 6.71E-01 | 3.21E-03 | -0.09 | -1.60 |
| <i>lpg2909</i> | 62aa ORF hypothetical                                                      |             | Unknown / hypothetical proteins           | 9.426  | 9.555  | 10.389 | 9.578  | 7.26E-01 | 1.47E-02 | 0.13  | -0.81 |
| <i>lpg2910</i> | histamine oxidase (copper amine oxidase (phenylethylan                     | <i>tynA</i> | Amino Acid Metabolism, Metabolism o       | 8.871  | 9.379  | 9.340  | 9.835  | 1.85E-01 | 2.69E-01 | 0.51  | 0.50  |
| <i>lpg2910</i> | histamine oxidase (copper amine oxidase (phenylethylan                     | <i>tynA</i> | Amino Acid Metabolism, Metabolism o       | 8.475  | 10.122 | 9.376  | 9.897  | 2.66E-04 | 2.40E-01 | 1.65  | 0.52  |
| <i>lpg2911</i> | serine carboxypeptidase (protective protein for beta-galactosidase)        |             | Detoxification / adaptation, Protein fate | 9.377  | 9.333  | 9.533  | 8.164  | 8.98E-01 | 3.15E-01 | -0.04 | -1.37 |
| <i>lpg2911</i> | serine carboxypeptidase (protective protein for beta-galactosidase)        |             | Detoxification / adaptation, Protein fate | 9.660  | 9.007  | 10.023 | 9.791  | 1.67E-01 | 7.43E-01 | -0.65 | 0.23  |
| <i>lpg2912</i> | ORF                                                                        |             | ORFs of unknown function (unique)         | 14.169 | 13.514 | 11.256 | 13.302 | 3.70E-01 | 8.88E-03 | -0.65 | 2.05  |
| <i>lpg2912</i> | ORF                                                                        |             | ORFs of unknown function (unique)         | 14.097 | 13.549 | 11.069 | 13.335 | 3.91E-01 | 9.23E-03 | -0.55 | 2.27  |
| <i>lpg2913</i> | hypothetical (DEXX-box ATPase?)                                            |             | Unknown / hypothetical proteins           | 8.933  | 9.186  | 8.354  | 8.655  | 5.51E-01 | 6.77E-01 | 0.25  | 0.30  |
| <i>lpg2913</i> | hypothetical (DEXX-box ATPase?)                                            |             | Unknown / hypothetical proteins           | 8.497  | 8.671  | 8.647  | 9.029  | 8.48E-01 | 4.93E-01 | 0.17  | 0.38  |
| <i>lpg2914</i> | hypothetical (transcriptional regulator cro/cl family), bacterial regulato |             | Transcription factors / DNA binding prc   | 10.315 | 11.198 | 10.687 | 10.085 | 1.90E-02 | 2.92E-01 | 0.88  | -0.60 |
| <i>lpg2914</i> | hypothetical (transcriptional regulator cro/cl family), bacterial regulato |             | Transcription factors / DNA binding prc   | 10.533 | 11.340 | 10.702 | 10.600 | 5.07E-02 | 8.12E-01 | 0.81  | -0.10 |
| <i>lpg2915</i> | protein product; similar to unknown protein                                |             | Unknown / hypothetical proteins           | 10.882 | 9.425  | 11.234 | 8.360  | 4.52E-06 | 2.02E-02 | -1.46 | -2.87 |
| <i>lpg2915</i> | protein product; similar to unknown protein                                |             | Unknown / hypothetical proteins           | 10.921 | 9.989  | 11.076 | 9.373  | 2.01E-01 | 1.59E-01 | -0.93 | -1.70 |
| <i>lpg2916</i> | ORF                                                                        |             | ORFs of unknown function (unique)         | 9.924  | 8.474  | 9.690  | 8.499  | 5.74E-03 | 1.43E-02 | -1.45 | -1.19 |
| <i>lpg2916</i> | ORF                                                                        |             | ORFs of unknown function (unique)         | 9.072  | 7.963  | 9.374  | 8.493  | 1.70E-01 | 1.44E-01 | -1.11 | -0.88 |
| <i>lpg2917</i> | hypothetical                                                               |             | Unknown / hypothetical proteins           | 10.551 | 10.739 | 12.166 | 11.360 | 7.48E-01 | 9.57E-02 | 0.19  | -0.81 |
| <i>lpg2917</i> | hypothetical                                                               |             | Unknown / hypothetical proteins           | 10.419 | 11.444 | 11.994 | 11.509 | 2.50E-02 | 2.93E-01 | 1.02  | -0.48 |
| <i>lpg2918</i> | lytic murein transglycosylase (membrane bound)                             |             | Cell envelope synthesis                   | 10.594 | 11.567 | 12.944 | 10.844 | 1.78E-02 | 1.53E-03 | 0.97  | -2.10 |
| <i>lpg2918</i> | lytic murein transglycosylase (membrane bound)                             |             | Cell envelope synthesis                   | 10.612 | 11.698 | 12.913 | 10.956 | 1.48E-02 | 2.88E-03 | 1.09  | -1.96 |
| <i>lpg2919</i> | (serine-type) D-alanyl-D-alanine carboxypeptidase (D-stereospecific        |             | Cell envelope synthesis, Protein fate /   | 10.264 | 9.495  | 12.823 | 9.065  | 3.61E-01 | 1.02E-03 | -0.77 | -3.76 |
| <i>lpg2919</i> | (serine-type) D-alanyl-D-alanine carboxypeptidase (D-stereospecific        |             | Cell envelope synthesis, Protein fate /   | 10.298 | 9.411  | 12.898 | 9.273  | 2.62E-01 | 9.70E-04 | -0.89 | -3.63 |
| <i>lpg2920</i> | hypothetical (nucleotidyltransferase?)                                     |             | Unknown / hypothetical proteins           | 10.281 | 10.190 | 10.648 | 9.994  | 8.07E-01 | 1.39E-01 | -0.09 | -0.65 |
| <i>lpg2920</i> | hypothetical (nucleotidyltransferase?)                                     |             | Unknown / hypothetical proteins           | 9.997  | 10.100 | 10.447 | 10.130 | 8.48E-01 | 5.40E-01 | 0.10  | -0.32 |
| <i>lpg2921</i> | hypothetical (nucleotidyltransferase?)                                     |             | Unknown / hypothetical proteins           | 9.981  | 8.681  | 9.667  | 9.465  | 1.40E-02 | 6.61E-01 | -1.30 | -0.20 |
| <i>lpg2921</i> | hypothetical (nucleotidyltransferase?)                                     |             | Unknown / hypothetical proteins           | 9.751  | 8.783  | 9.661  | 9.464  | 1.59E-01 | 7.44E-01 | -0.97 | -0.20 |
| <i>lpg2922</i> | ABC transporter, permease                                                  |             | Transport and binding                     | 8.013  | 8.547  | 8.441  | 9.606  | 4.87E-01 | 1.77E-01 | 0.53  | 1.17  |
| <i>lpg2922</i> | ABC transporter, permease                                                  |             | Transport and binding                     | 8.139  | 7.747  | 6.552  | 7.912  | 6.40E-01 | 1.03E-01 | -0.39 | 1.36  |
| <i>lpg2923</i> | ABC transporter, ATP binding protein                                       |             | Transport and binding                     | 9.851  | 10.139 | 10.741 | 10.070 | 4.29E-01 | 9.88E-02 | 0.29  | -0.67 |
| <i>lpg2923</i> | ABC transporter, ATP binding protein                                       |             | Transport and binding                     | 9.562  | 9.290  | 10.439 | 9.897  | 5.14E-01 | 1.02E-01 | -0.27 | -0.54 |
| <i>lpg2924</i> | lipoprotein (RND efflux membrane fusion protein?)                          |             | Transport and binding                     | 9.174  | 9.480  | 10.194 | 10.385 | 5.10E-01 | 6.46E-01 | 0.31  | 0.19  |
| <i>lpg2924</i> | lipoprotein (RND efflux membrane fusion protein?)                          |             | Transport and binding                     | 9.066  | 10.541 | 10.326 | 10.840 | 1.66E-01 | 4.91E-01 | 1.48  | 0.51  |
| <i>lpg2925</i> | outer membrane efflux protein                                              |             | Transport and binding                     | 7.808  | 9.668  | 9.405  | 9.203  | 2.39E-03 | 4.24E-01 | 1.86  | -0.20 |
| <i>lpg2925</i> | outer membrane efflux protein                                              |             | Transport and binding                     | 7.044  | 10.083 | 8.673  | 9.356  | 2.26E-02 | 3.05E-01 | 3.04  | 0.68  |
| <i>lpg2926</i> | bis(5'-nucleosyl)tetrphosphatase, symmetrical (diadeno: <i>apaH</i>        |             | Nucleotide Metabolism                     | 8.062  | 7.868  | 8.481  | 8.451  | 7.70E-01 | 9.46E-01 | -0.19 | -0.03 |
| <i>lpg2926</i> | bis(5'-nucleosyl)tetrphosphatase, symmetrical (diadeno: <i>apaH</i>        |             | Nucleotide Metabolism                     | 7.827  | 7.808  | 7.674  | 9.015  | 9.85E-01 | 2.08E-01 | -0.02 | 1.34  |
| <i>lpg2927</i> | conserved hypothetical protein                                             |             | Unknown / hypothetical proteins           | 11.143 | 10.996 | 11.635 | 11.725 | 5.36E-01 | 6.80E-01 | -0.15 | 0.09  |
| <i>lpg2927</i> | conserved hypothetical protein                                             |             | Unknown / hypothetical proteins           | 11.102 | 11.450 | 11.668 | 11.995 | 4.91E-01 | 3.00E-01 | 0.35  | 0.33  |
| <i>lpg2928</i> | dimethyladenosine transferase (S-adenosylmethionine-6                      | <i>ksgA</i> | DNA/RNA degradation / restriction         | 12.101 | 11.686 | 10.837 | 11.818 | 1.80E-01 | 3.32E-02 | -0.42 | 0.98  |
| <i>lpg2928</i> | dimethyladenosine transferase (S-adenosylmethionine-6                      | <i>ksgA</i> | DNA/RNA degradation / restriction         | 11.982 | 11.820 | 11.024 | 12.057 | 6.03E-01 | 1.43E-04 | -0.16 | 1.03  |
| <i>lpg2929</i> | aspartate-1-decarboxylase (L-aspartate-alpha-decarboxy                     | <i>panD</i> | Amino Acid Metabolism, Metabolism o       | 11.109 | 12.988 | 9.991  | 12.125 | 5.36E-04 | 2.62E-03 | 1.88  | 2.13  |
| <i>lpg2929</i> | aspartate-1-decarboxylase (L-aspartate-alpha-decarboxy                     | <i>panD</i> | Amino Acid Metabolism, Metabolism o       | 11.287 | 12.918 | 9.611  | 12.109 | 2.62E-06 | 4.20E-03 | 1.63  | 2.50  |
| <i>lpg2930</i> | sec-independent (periplasmic) protein translocase protei                   | <i>tatC</i> | Protein fate / hydrolases / secretion     | 12.154 | 10.006 | 10.804 | 10.274 | 7.43E-04 | 8.45E-02 | -2.15 | -0.53 |
| <i>lpg2930</i> | sec-independent (periplasmic) protein translocase protei                   | <i>tatC</i> | Protein fate / hydrolases / secretion     | 11.977 | 9.855  | 10.635 | 10.232 | 7.91E-03 | 2.53E-01 | -2.12 | -0.40 |
| <i>lpg2931</i> | conserved hypothetical protein, COG3785                                    |             | Unknown / hypothetical proteins           | 9.322  | 9.375  | 11.956 | 9.090  | 9.41E-01 | 3.77E-03 | 0.05  | -2.87 |
| <i>lpg2931</i> | conserved hypothetical protein, COG3785                                    |             | Unknown / hypothetical proteins           | 9.231  | 8.922  | 11.904 | 9.528  | 6.12E-01 | 1.11E-02 | -0.31 | -2.38 |
| <i>lpg2932</i> | CDP-6-deoxy-3,4-glucoseen reductase (NAD(P)H-flavin                        | <i>ubiB</i> | Metabolism of Cofactors and Vitamins      | 10.566 | 8.855  | 10.056 | 10.229 | 6.75E-02 | 8.98E-01 | -1.71 | 0.17  |
| <i>lpg2932</i> | CDP-6-deoxy-3,4-glucoseen reductase (NAD(P)H-flavin                        | <i>ubiB</i> | Metabolism of Cofactors and Vitamins      | 10.247 | 9.559  | 9.771  | 10.649 | 3.09E-01 | 7.77E-02 | -0.69 | 0.88  |
| <i>lpg2933</i> | oxidoreductase; 3-octaprenyl-4-hydroxybenzoate carbox                      | <i>yigC</i> | Metabolism of Cofactors and Vitamins      | 12.044 | 12.773 | 13.339 | 13.016 | 1.22E-02 | 2.21E-01 | 0.73  | -0.32 |
| <i>lpg2933</i> | oxidoreductase; 3-octaprenyl-4-hydroxybenzoate carbox                      | <i>yigC</i> | Metabolism of Cofactors and Vitamins      | 12.055 | 12.843 | 13.280 | 13.465 | 2.02E-02 | 6.57E-01 | 0.79  | 0.19  |
| <i>lpg2934</i> | transcription termination factor rho                                       |             | Transcription                             | 12.660 | 12.188 | 11.755 | 13.494 | 2.10E-01 | 1.65E-03 | -0.47 | 1.74  |
| <i>lpg2934</i> | transcription termination factor rho                                       |             | Transcription                             | 12.273 | 12.206 | 11.311 | 13.406 | 8.90E-01 | 7.88E-04 | -0.07 | 2.09  |
| <i>lpg2935</i> | RSc1188; probable thioredoxin 1 (redox factor) protein                     | <i>trxA</i> | Energy Metabolism                         | 13.312 | 12.246 | 11.860 | 12.386 | 9.92E-02 | 3.48E-01 | -1.07 | 0.53  |
| <i>lpg2935</i> | RSc1188; probable thioredoxin 1 (redox factor) protein                     | <i>trxA</i> | Energy Metabolism                         | 13.120 | 12.389 | 11.578 | 12.587 | 3.33E-01 | 9.08E-02 | -0.73 | 1.01  |
| <i>lpg2936</i> | hypothetical                                                               |             | Unknown / hypothetical proteins           | 10.834 | 11.341 | 10.368 | 11.565 | 1.05E-01 | 6.78E-03 | 0.51  | 1.20  |
| <i>lpg2936</i> | hypothetical                                                               |             | Unknown / hypothetical proteins           | 10.630 | 11.233 | 10.133 | 11.490 | 8.89E-03 | 2.52E-03 | 0.60  | 1.36  |
| <i>lpg2937</i> | fumarate hydratase (fumarase)                                              | <i>fum</i>  | Carbohydrate Metabolism, Energy Me        | 11.319 | 11.642 | 11.730 | 12.344 | 2.88E-01 | 2.54E-03 | 0.32  | 0.61  |
| <i>lpg2937</i> | fumarate hydratase (fumarase)                                              | <i>fum</i>  | Carbohydrate Metabolism, Energy Me        | 11.524 | 11.804 | 11.658 | 12.374 | 2.02E-01 | 2.97E-04 | 0.28  | 0.72  |

|                |                                                                           |             |                                        |        |        |        |        |          |          |       |       |
|----------------|---------------------------------------------------------------------------|-------------|----------------------------------------|--------|--------|--------|--------|----------|----------|-------|-------|
| <i>lpg2938</i> | ORF                                                                       |             | ORFs of unknown function (unique)      | 9.181  | 8.022  | 7.516  | 7.471  | 1.21E-02 | 9.66E-01 | -1.16 | -0.04 |
| <i>lpg2938</i> | ORF                                                                       |             | ORFs of unknown function (unique)      | 8.964  | 8.473  | 8.406  | 8.992  | 1.79E-01 | 9.76E-02 | -0.49 | 0.59  |
| <i>lpg2939</i> | hypothetical (BNR/Asp box repeat protein)                                 |             | Named proteins of general function     | 10.109 | 9.297  | 9.268  | 9.567  | 1.29E-01 | 4.72E-01 | -0.81 | 0.30  |
| <i>lpg2939</i> | hypothetical (BNR/Asp box repeat protein)                                 |             | Named proteins of general function     | 10.406 | 9.042  | 8.258  | 9.569  | 7.14E-04 | 1.50E-01 | -1.36 | 1.31  |
| <i>lpg2940</i> | lipid A lauroyl acyltransferase (may be fused with prior OI <i>waam</i> ) |             | Cell envelope synthesis, Lipid Metabol | 9.802  | 9.864  | 10.128 | 9.802  | 8.06E-01 | 4.16E-01 | 0.06  | 0.49  |
| <i>lpg2940</i> | lipid A lauroyl acyltransferase (may be fused with prior OI <i>waam</i> ) |             | Cell envelope synthesis, Lipid Metabol | 9.753  | 9.279  | 8.896  | 10.248 | 3.57E-01 | 1.71E-01 | -0.47 | 1.35  |
| <i>lpg2941</i> | hypothetical (lipid A biosynthesis lauroyl acyltransferase) <i>waam</i>   |             | Cell envelope synthesis, Lipid Metabol | 10.429 | 8.979  | 9.075  | 9.439  | 2.14E-02 | 6.65E-01 | -1.45 | 0.36  |
| <i>lpg2941</i> | hypothetical (lipid A biosynthesis lauroyl acyltransferase) <i>waam</i>   |             | Cell envelope synthesis, Lipid Metabol | 10.578 | 9.826  | 8.570  | 9.887  | 3.40E-01 | 2.49E-01 | -0.75 | 1.32  |
| <i>lpg2942</i> | ORF                                                                       |             | ORFs of unknown function (unique)      | 13.419 | 13.434 | 12.103 | 13.146 | 9.73E-01 | 6.46E-02 | 0.02  | 1.04  |
| <i>lpg2942</i> | ORF                                                                       |             | ORFs of unknown function (unique)      | 13.300 | 12.111 | 13.276 | 12.111 | 8.35E-01 | 1.49E-02 | 0.12  | 1.16  |
| <i>lpg2943</i> | UDP-N-acetylglucosamine acyltransferase, acyl-[acyl carrier protein]-     |             | Metabolism of Complex Carbohydrate:    | 10.883 | 11.089 | 8.067  | 11.496 | 7.14E-01 | 3.41E-03 | 0.21  | 3.43  |
| <i>lpg2943</i> | UDP-N-acetylglucosamine acyltransferase, acyl-[acyl carrier protein]-     |             | Metabolism of Complex Carbohydrate:    | 10.931 | 11.290 | 8.182  | 12.029 | 5.53E-01 | 1.03E-02 | 0.36  | 3.85  |
| <i>lpg2944</i> | UDP-3-O-[3-hydroxymyristoyl] glucosamine N-acyltransf                     | <i>lpxD</i> | Metabolism of Complex Carbohydrate:    | 11.244 | 10.559 | 11.033 | 10.735 | 8.84E-03 | 4.61E-01 | -0.69 | -0.30 |
| <i>lpg2944</i> | UDP-3-O-[3-hydroxymyristoyl] glucosamine N-acyltransf                     | <i>lpxD</i> | Metabolism of Complex Carbohydrate:    | 11.256 | 10.839 | 11.211 | 11.184 | 3.63E-01 | 9.66E-01 | -0.42 | -0.03 |
| <i>lpg2945</i> | lipid A-disaccharide synthase                                             | <i>lpxB</i> | Metabolism of Complex Carbohydrate:    | 9.589  | 9.323  | 8.762  | 10.196 | 2.69E-01 | 6.55E-03 | -0.27 | 1.43  |
| <i>lpg2945</i> | lipid A-disaccharide synthase                                             | <i>lpxB</i> | Metabolism of Complex Carbohydrate:    | 9.576  | 9.548  | 8.688  | 10.198 | 9.41E-01 | 6.85E-03 | -0.03 | 1.51  |
| <i>lpg2946</i> | unknown protein                                                           |             | Unknown / hypothetical proteins        | 9.635  | 8.536  | 8.292  | 8.911  | 2.38E-02 | 3.26E-01 | -1.10 | 0.62  |
| <i>lpg2946</i> | unknown protein                                                           |             | Unknown / hypothetical proteins        | 9.682  | 8.324  | 7.228  | 8.900  | 1.62E-02 | 9.00E-02 | -1.36 | 1.67  |
| <i>lpg2947</i> | ABC transporter, ATP binding protein                                      |             | Transport and binding                  | 8.379  | 7.715  | 8.195  | 9.261  | 6.62E-01 | 5.10E-01 | -0.66 | 1.07  |
| <i>lpg2947</i> | ABC transporter, ATP binding protein                                      |             | Transport and binding                  | 9.282  | 8.530  | 6.971  | 8.647  | 1.72E-01 | 2.02E-01 | -0.75 | 1.68  |
| <i>lpg2948</i> | hypothetical protein                                                      |             | Unknown / hypothetical proteins        | 11.430 | 10.337 | 9.964  | 10.925 | 5.70E-02 | 1.16E-01 | -1.09 | 0.96  |
| <i>lpg2948</i> | hypothetical protein                                                      |             | Unknown / hypothetical proteins        | 11.484 | 10.363 | 9.659  | 10.992 | 2.39E-02 | 7.34E-02 | -1.12 | 1.33  |
| <i>lpg2949</i> | asparagine synthetase (B) (glutamine hydrolyzing)                         | <i>wbml</i> | Amino Acid Metabolism                  | 10.284 | 9.782  | 10.181 | 10.982 | 3.74E-01 | 1.63E-01 | -0.50 | 0.80  |
| <i>lpg2949</i> | asparagine synthetase (B) (glutamine hydrolyzing)                         | <i>wbml</i> | Amino Acid Metabolism                  | 10.838 | 11.208 | 10.109 | 13.059 | 6.24E-01 | 5.45E-05 | 0.37  | 2.95  |
| <i>lpg2950</i> | hypothetical protein                                                      |             | Unknown / hypothetical proteins        | 11.021 | 9.095  | 10.497 | 9.922  | 3.30E-03 | 1.59E-01 | -1.93 | -0.58 |
| <i>lpg2950</i> | hypothetical protein                                                      |             | Unknown / hypothetical proteins        | 11.243 | 8.709  | 10.254 | 10.029 | 8.82E-04 | 6.82E-01 | -2.53 | -0.23 |
| <i>lpg2951</i> | cystathionine beta synthase (cysteine synthase)                           |             | Amino Acid Metabolism, Metabolism o    | 10.587 | 11.666 | 10.373 | 11.323 | 4.46E-02 | 3.86E-02 | 1.08  | 0.95  |
| <i>lpg2951</i> | cystathionine beta synthase (cysteine synthase)                           |             | Amino Acid Metabolism, Metabolism o    | 10.684 | 11.655 | 10.314 | 11.353 | 3.25E-02 | 5.15E-02 | 0.97  | 1.04  |
| <i>lpg2952</i> | ORF                                                                       |             | ORFs of unknown function (unique)      | 9.615  | 9.352  | 10.432 | 8.978  | 3.26E-01 | 1.54E-03 | -0.26 | -1.45 |
| <i>lpg2952</i> | ORF                                                                       |             | ORFs of unknown function (unique)      | 9.492  | 8.857  | 10.323 | 9.104  | 1.01E-02 | 8.40E-03 | -0.64 | -1.22 |
| <i>lpg2953</i> | ORF                                                                       |             | ORFs of unknown function (unique)      | 11.853 | 10.991 | 12.711 | 9.986  | 8.52E-02 | 9.70E-04 | -0.86 | -2.73 |
| <i>lpg2953</i> | ORF                                                                       |             | ORFs of unknown function (unique)      | 10.911 | 10.956 | 11.924 | 9.952  | 9.41E-01 | 1.18E-02 | 0.04  | -1.97 |
| <i>lpg2954</i> | Hypothetical protein                                                      |             | Unknown / hypothetical proteins        | 12.313 | 13.246 | 13.560 | 13.151 | 2.35E-01 | 7.12E-01 | 0.93  | -0.41 |
| <i>lpg2954</i> | Hypothetical protein                                                      |             | Unknown / hypothetical proteins        | 12.274 | 13.380 | 13.559 | 13.530 | 1.51E-01 | 9.76E-01 | 1.11  | -0.03 |
| <i>lpg2955</i> | integration host factor beta subunit (bacterial nucleoid D) <i>hipB</i>   |             | Transcription                          | 10.476 | 12.173 | 13.154 | 11.142 | 1.45E-02 | 1.18E-02 | 1.70  | -2.01 |
| <i>lpg2955</i> | integration host factor beta subunit (bacterial nucleoid D) <i>hipB</i>   |             | Transcription                          | 10.483 | 12.195 | 13.217 | 11.285 | 1.57E-02 | 1.19E-02 | 1.71  | -1.93 |
| <i>lpg2956</i> | deoxycytidine triphosphate deaminase                                      | <i>dcd</i>  | Nucleotide Metabolism                  | 14.562 | 14.554 | 12.922 | 15.648 | 9.82E-01 | 6.37E-06 | -0.01 | 2.73  |
| <i>lpg2956</i> | deoxycytidine triphosphate deaminase                                      | <i>dcd</i>  | Nucleotide Metabolism                  | 14.417 | 14.535 | 12.914 | 15.720 | 6.66E-01 | 1.76E-06 | 0.12  | 2.81  |
| <i>lpg2957</i> | stomatin like transmembrane protein                                       |             | Named proteins of general function     | 9.841  | 10.256 | 13.281 | 10.068 | 6.04E-01 | 8.35E-04 | 0.41  | -3.21 |
| <i>lpg2957</i> | stomatin like transmembrane protein                                       |             | Named proteins of general function     | 9.961  | 10.459 | 13.357 | 10.399 | 5.29E-01 | 1.24E-03 | 0.50  | -2.96 |
| <i>lpg2958</i> | transmembrane protein (nodulation competitiveness protein)                |             | Chemotaxis / motility / cell division  | 9.007  | 8.424  | 11.687 | 8.860  | 4.89E-01 | 6.53E-03 | -0.58 | -2.83 |
| <i>lpg2958</i> | transmembrane protein (nodulation competitiveness protein)                |             | Chemotaxis / motility / cell division  | 9.190  | 8.816  | 11.776 | 9.194  | 6.01E-01 | 4.25E-03 | -0.37 | -2.58 |
| <i>lpg2959</i> | conserved hypothetical protein                                            |             | Unknown / hypothetical proteins        | 11.449 | 12.558 | 9.724  | 12.243 | 8.39E-04 | 3.05E-04 | 1.11  | 2.52  |
| <i>lpg2959</i> | conserved hypothetical protein                                            |             | Unknown / hypothetical proteins        | 11.156 | 12.516 | 9.534  | 12.203 | 8.52E-03 | 1.03E-03 | 1.36  | 2.67  |
| <i>lpg2960</i> | major outer membrane protein                                              |             | Toxin production / other pathogen func | 12.099 | 11.283 | 10.586 | 11.448 | 1.94E-01 | 1.81E-01 | -0.82 | 0.86  |
| <i>lpg2960</i> | major outer membrane protein                                              |             | Toxin production / other pathogen func | 11.934 | 11.614 | 9.949  | 11.606 | 6.36E-01 | 4.56E-02 | -0.32 | 1.66  |
| <i>lpg2961</i> | major outer membrane protein                                              |             | Toxin production / other pathogen func | 14.769 | 14.373 | 14.512 | 14.568 | 7.63E-01 | 9.54E-01 | -0.40 | 0.06  |
| <i>lpg2961</i> | major outer membrane protein                                              |             | Toxin production / other pathogen func | 14.558 | 14.713 | 14.603 | 14.837 | 8.81E-01 | 7.68E-01 | 0.15  | 0.23  |
| <i>lpg2962</i> | sodium-type flagellar protein (lateral flagellar MotY-like protein)       |             | Chemotaxis / motility / cell division  | 8.700  | 9.820  | 12.445 | 8.805  | 1.86E-01 | 3.18E-05 | 1.12  | -3.64 |
| <i>lpg2962</i> | sodium-type flagellar protein (lateral flagellar MotY-like protein)       |             | Chemotaxis / motility / cell division  | 9.266  | 9.717  | 11.602 | 8.970  | 5.75E-01 | 2.26E-02 | 0.45  | -2.63 |
| <i>lpg2963</i> | dihydroorotase, homodimeric type                                          | <i>pyrC</i> | Nucleotide Metabolism                  | 10.743 | 10.942 | 9.294  | 10.357 | 5.93E-01 | 6.24E-02 | 0.20  | 1.06  |
| <i>lpg2963</i> | dihydroorotase, homodimeric type                                          | <i>pyrC</i> | Nucleotide Metabolism                  | 10.840 | 9.536  | 9.038  | 10.379 | 4.17E-01 | 2.92E-02 | -1.30 | 1.34  |
| <i>lpg2964</i> | ribonuclease T                                                            | <i>mt</i>   | DNA/RNA degradation / restriction      | 11.022 | 11.346 | 10.762 | 10.983 | 3.56E-01 | 5.30E-01 | 0.32  | 0.22  |
| <i>lpg2964</i> | ribonuclease T                                                            | <i>mt</i>   | DNA/RNA degradation / restriction      | 10.911 | 11.115 | 10.154 | 10.968 | 4.82E-01 | 1.12E-01 | 0.20  | 0.81  |
| <i>lpg2965</i> | peroxynitrite reductase; alkylhydrogen peroxide reductase, AhpC/Tsa       |             | Detoxification / adaptation            | 12.374 | 12.700 | 12.028 | 12.482 | 1.83E-01 | 2.00E-02 | 0.33  | 0.45  |
| <i>lpg2965</i> | peroxynitrite reductase; alkylhydrogen peroxide reductase, AhpC/Tsa       |             | Detoxification / adaptation            | 12.258 | 12.678 | 12.013 | 12.554 | 1.86E-01 | 3.40E-02 | 0.42  | 0.54  |
| <i>lpg2966</i> | glutaredoxin-related protein                                              |             | Detoxification / adaptation            | 14.279 | 14.312 | 13.778 | 14.189 | 8.99E-01 | 1.17E-01 | 0.03  | 0.41  |
| <i>lpg2966</i> | glutaredoxin-related protein                                              |             | Detoxification / adaptation            | 14.232 | 14.338 | 13.788 | 14.217 | 6.48E-01 | 1.04E-01 | 0.11  | 0.43  |
| <i>lpg2967</i> | superoxide dismutase                                                      | <i>sodB</i> | Detoxification / adaptation            | 12.077 | 13.540 | 11.214 | 13.702 | 1.21E-02 | 2.24E-05 | 1.46  | 2.49  |
| <i>lpg2967</i> | superoxide dismutase                                                      | <i>sodB</i> | Detoxification / adaptation            | 11.968 | 13.586 | 11.186 | 13.739 | 1.52E-02 | 3.59E-06 | 1.62  | 2.59  |
| <i>lpg2968</i> | N-acetylornithine aminotransferase ArgD                                   | <i>argD</i> | Amino Acid Metabolism                  | 12.840 | 13.827 | 10.992 | 13.945 | 2.75E-02 | 3.84E-05 | 0.99  | 2.95  |
| <i>lpg2968</i> | N-acetylornithine aminotransferase ArgD                                   | <i>argD</i> | Amino Acid Metabolism                  | 12.811 | 13.888 | 11.006 | 14.026 | 1.96E-02 | 3.56E-05 | 1.08  | 3.02  |
| <i>lpg2969</i> | hypothetical (arylsulfatase?, metal dependent hydrolase?)                 |             | Unknown / hypothetical proteins        | 7.850  | 8.081  | 9.298  | 7.377  | 7.41E-01 | 2.68E-01 | 0.23  | -1.92 |
| <i>lpg2969</i> | hypothetical (arylsulfatase?, metal dependent hydrolase?)                 |             | Unknown / hypothetical proteins        | 7.992  | 8.187  | 8.772  | 7.925  | 6.69E-01 | 6.16E-01 | 0.19  | -0.85 |

|                |                                                                        |             |                                        |        |        |        |        |          |          |       |       |
|----------------|------------------------------------------------------------------------|-------------|----------------------------------------|--------|--------|--------|--------|----------|----------|-------|-------|
| <i>lpg2970</i> | glycerophosphoryl diester phosphodiesterase                            |             | Metabolism of Complex Lipids           | 10.940 | 11.266 | 11.408 | 10.185 | 3.00E-01 | 5.30E-02 | 0.33  | -1.22 |
| <i>lpg2970</i> | glycerophosphoryl diester phosphodiesterase                            |             | Metabolism of Complex Lipids           | 11.038 | 11.360 | 11.385 | 10.366 | 1.37E-01 | 1.20E-01 | 0.32  | -1.02 |
| <i>lpg2971</i> | malate dehydrogenase (NAD-linked), malic enzyme (NAI <i>maeA</i> )     |             | Carbohydrate Metabolism                | 12.239 | 14.042 | 14.853 | 13.156 | 3.03E-02 | 5.92E-02 | 1.80  | -1.70 |
| <i>lpg2971</i> | malate dehydrogenase (NAD-linked), malic enzyme (NAI <i>maeA</i> )     |             | Carbohydrate Metabolism                | 12.233 | 14.103 | 14.959 | 13.394 | 2.59E-02 | 5.17E-02 | 1.87  | -1.56 |
| <i>lpg2972</i> | SUA5/YciO/YrdC family:Sua5/YciO/YrdC protein family (translat          |             | Translation                            | 10.480 | 9.639  | 12.011 | 10.398 | 2.57E-01 | 3.17E-03 | -0.84 | -1.61 |
| <i>lpg2972</i> | SUA5/YciO/YrdC family:Sua5/YciO/YrdC protein family (translat          |             | Translation                            | 10.498 | 10.162 | 12.022 | 10.721 | 4.59E-01 | 1.49E-03 | -0.34 | -1.30 |
| <i>lpg2973</i> | tRNA-Met                                                               |             | tRNA                                   | 9.534  | 10.380 | 9.259  | 10.393 | 5.40E-02 | 1.17E-02 | 0.85  | 1.13  |
| <i>lpg2973</i> | tRNA-Met                                                               |             | tRNA                                   | 9.330  | 10.346 | 8.991  | 10.486 | 4.63E-03 | 1.10E-02 | 1.02  | 1.49  |
| <i>lpg2974</i> | phosphatidylserine decarboxylase                                       | <i>psd</i>  | Amino Acid Metabolism, Metabolism o    | 11.638 | 11.925 | 10.397 | 12.200 | 4.29E-01 | 6.62E-03 | 0.29  | 1.80  |
| <i>lpg2974</i> | phosphatidylserine decarboxylase                                       | <i>psd</i>  | Amino Acid Metabolism, Metabolism o    | 11.719 | 11.705 | 10.364 | 12.185 | 9.59E-01 | 4.04E-03 | -0.01 | 1.82  |
| <i>lpg2975</i> | ORF                                                                    |             | ORFs of unknown function (unique)      | 12.003 | 11.748 | 11.898 | 11.939 | 5.05E-01 | 9.25E-01 | -0.26 | 0.04  |
| <i>lpg2975</i> | ORF                                                                    |             | ORFs of unknown function (unique)      | 11.850 | 12.045 | 11.845 | 12.179 | 5.03E-01 | 1.85E-01 | 0.19  | 0.33  |
| <i>lpg2976</i> | ORF                                                                    |             | ORFs of unknown function (unique)      | 9.785  | 11.657 | 11.245 | 10.222 | 5.89E-03 | 9.70E-02 | 1.87  | -1.02 |
| <i>lpg2976</i> | ORF                                                                    |             | ORFs of unknown function (unique)      | 9.823  | 11.797 | 11.161 | 10.495 | 3.61E-03 | 2.16E-01 | 1.97  | -0.67 |
| <i>lpg2977</i> | zinc metalloprotease (virulence metalloprotease, hemagglutinin/prote   |             | Toxin production / other pathogen func | 11.082 | 11.992 | 12.277 | 11.259 | 3.05E-02 | 6.43E-02 | 0.91  | -1.02 |
| <i>lpg2977</i> | zinc metalloprotease (virulence metalloprotease, hemagglutinin/prote   |             | Toxin production / other pathogen func | 11.078 | 12.035 | 12.333 | 11.394 | 1.34E-02 | 4.48E-02 | 0.96  | -0.94 |
| <i>lpg2978</i> | small ORF (119aa)                                                      |             | ORFs of unknown function (unique)      | 8.979  | 8.873  | 8.828  | 8.124  | 8.95E-01 | 4.49E-01 | -0.11 | -0.70 |
| <i>lpg2978</i> | small ORF (119aa)                                                      |             | ORFs of unknown function (unique)      | 8.788  | 8.588  | 9.214  | 8.691  | 7.46E-01 | 1.98E-01 | -0.20 | -0.52 |
| <i>lpg2979</i> | conserved hypothetical protein                                         |             | Unknown / hypothetical proteins        | 11.312 | 10.435 | 12.333 | 10.356 | 4.02E-01 | 1.07E-01 | -0.88 | -1.98 |
| <i>lpg2979</i> | conserved hypothetical protein                                         |             | Unknown / hypothetical proteins        | 10.642 | 11.611 | 11.944 | 11.591 | 1.92E-01 | 6.63E-01 | -0.97 | -0.35 |
| <i>lpg2980</i> | DNA topoisomerase IV subunit A                                         | <i>parC</i> | Replication and Repair                 | 9.673  | 10.930 | 8.699  | 10.636 | 1.39E-01 | 2.23E-02 | 1.26  | 1.94  |
| <i>lpg2980</i> | DNA topoisomerase IV subunit A                                         | <i>parC</i> | Replication and Repair                 | 9.673  | 10.965 | 8.432  | 10.638 | 1.46E-01 | 2.73E-02 | 1.29  | 2.21  |
| <i>lpg2981</i> | ATP synthase epsilon chain, ATP synthase F1 epsilon su <i>atpC</i>     |             | Energy Metabolism                      | 13.466 | 12.018 | 11.448 | 12.953 | 9.34E-02 | 8.80E-02 | -1.45 | 1.51  |
| <i>lpg2981</i> | ATP synthase epsilon chain, ATP synthase F1 epsilon su <i>atpC</i>     |             | Energy Metabolism                      | 13.229 | 11.949 | 11.331 | 13.432 | 2.53E-01 | 3.68E-03 | -1.28 | 2.10  |
| <i>lpg2982</i> | H+-transporting two-sector ATPase, ATP synthase F1 sul <i>atpD</i>     |             | Energy Metabolism                      | 12.547 | 11.866 | 9.968  | 13.525 | 5.32E-01 | 1.13E-03 | -0.68 | 3.56  |
| <i>lpg2982</i> | H+-transporting two-sector ATPase, ATP synthase F1 sul <i>atpD</i>     |             | Energy Metabolism                      | 13.021 | 11.757 | 9.997  | 13.578 | 1.29E-01 | 8.95E-04 | -1.26 | 3.58  |
| <i>lpg2983</i> | ATP synthase gamma chain, ATP synthase F1 gamma ct <i>atpG</i>         |             | Energy Metabolism                      | 12.552 | 11.820 | 9.911  | 13.628 | 3.59E-01 | 2.72E-03 | -0.73 | 3.72  |
| <i>lpg2983</i> | ATP synthase gamma chain, ATP synthase F1 gamma ct <i>atpG</i>         |             | Energy Metabolism                      | 12.609 | 11.017 | 9.494  | 13.519 | 1.53E-01 | 4.33E-03 | -1.59 | 4.03  |
| <i>lpg2984</i> | F0F1-ATPase subunit alpha, ATP synthase alpha chain                    |             | Energy Metabolism                      | 13.853 | 12.337 | 11.854 | 14.156 | 9.42E-02 | 8.06E-02 | -1.52 | 2.30  |
| <i>lpg2984</i> | F0F1-ATPase subunit alpha, ATP synthase alpha chain                    |             | Energy Metabolism                      | 13.879 | 12.861 | 11.894 | 15.064 | 1.21E-01 | 2.34E-04 | -1.02 | 3.17  |
| <i>lpg2985</i> | ATP synthase F1, delta subunit (F0F1 ATPase subunit de <i>atpH</i>     |             | Energy Metabolism                      | 13.057 | 10.928 | 11.039 | 13.258 | 2.96E-04 | 2.52E-03 | -2.13 | 2.22  |
| <i>lpg2985</i> | ATP synthase F1, delta subunit (F0F1 ATPase subunit de <i>atpH</i>     |             | Energy Metabolism                      | 13.071 | 10.923 | 10.877 | 13.265 | 1.98E-04 | 3.01E-03 | -2.15 | 2.39  |
| <i>lpg2986</i> | ATP synthase F0, B subunit                                             | <i>atpF</i> | Energy Metabolism                      | 12.298 | 11.512 | 10.708 | 13.123 | 2.66E-01 | 2.70E-03 | -0.79 | 2.42  |
| <i>lpg2986</i> | ATP synthase F0, B subunit                                             | <i>atpF</i> | Energy Metabolism                      | 12.368 | 11.595 | 10.388 | 13.190 | 1.62E-01 | 1.91E-03 | -0.77 | 2.80  |
| <i>lpg2987</i> | ATP synthase F0, C subunit                                             | <i>atpE</i> | Energy Metabolism                      | 14.187 | 13.586 | 12.566 | 13.392 | 4.13E-01 | 6.34E-01 | -0.60 | 0.83  |
| <i>lpg2987</i> | ATP synthase F0, C subunit                                             | <i>atpE</i> | Energy Metabolism                      | 13.830 | 13.733 | 12.388 | 14.620 | 8.39E-01 | 9.92E-04 | -0.10 | 2.23  |
| <i>lpg2988</i> | ATP synthase F0, A subunit (ATP synthase A chain)                      | <i>atpB</i> | Energy Metabolism                      | 12.609 | 11.707 | 11.486 | 12.942 | 4.12E-02 | 4.05E-03 | -0.90 | 1.46  |
| <i>lpg2988</i> | ATP synthase F0, A subunit (ATP synthase A chain)                      | <i>atpB</i> | Energy Metabolism                      | 12.673 | 11.754 | 11.180 | 13.058 | 2.19E-02 | 3.74E-03 | -0.92 | 1.88  |
| <i>lpg2989</i> | ATP synthase protein I (ATP synthase F0, I subunit)                    | <i>atpI</i> | Energy Metabolism                      | 12.414 | 11.910 | 10.647 | 13.853 | 4.69E-01 | 8.53E-04 | -0.50 | 3.21  |
| <i>lpg2989</i> | ATP synthase protein I (ATP synthase F0, I subunit)                    | <i>atpI</i> | Energy Metabolism                      | 12.523 | 11.886 | 10.672 | 13.916 | 2.69E-01 | 7.15E-04 | -0.64 | 3.24  |
| <i>lpg2990</i> | ORF                                                                    |             | ORFs of unknown function (unique)      | 12.278 | 10.284 | 10.989 | 12.160 | 4.72E-08 | 1.84E-02 | -1.99 | 1.17  |
| <i>lpg2990</i> | ORF                                                                    |             | ORFs of unknown function (unique)      | 12.148 | 9.390  | 10.527 | 12.110 | 4.68E-05 | 1.87E-02 | -2.76 | 1.58  |
| <i>lpg2991</i> | hemolysin, lipoprotein                                                 |             | Toxin production / other pathogen func | 10.729 | 8.429  | 9.316  | 8.013  | 1.91E-02 | 3.21E-01 | -2.30 | -1.30 |
| <i>lpg2991</i> | hemolysin, lipoprotein                                                 |             | Toxin production / other pathogen func | 10.742 | 10.567 | 10.001 | 9.954  | 8.78E-01 | 9.59E-01 | -0.18 | -0.05 |
| <i>lpg2992</i> | periplasmic protein (lipoprotein, hemolysin)                           |             | Named proteins of general function     | 15.178 | 15.598 | 15.503 | 15.769 | 2.26E-02 | 1.15E-01 | 0.42  | 0.27  |
| <i>lpg2992</i> | periplasmic protein (lipoprotein, hemolysin)                           |             | Named proteins of general function     | 15.173 | 15.623 | 15.456 | 15.742 | 5.50E-03 | 1.11E-01 | 0.45  | 0.29  |
| <i>lpg2993</i> | phosphoheptose isomerase                                               | <i>gmhA</i> | Metabolism of Complex Carbohydrate:    | 10.841 | 9.848  | 9.620  | 11.263 | 2.93E-02 | 1.66E-03 | -0.99 | 1.64  |
| <i>lpg2993</i> | phosphoheptose isomerase                                               | <i>gmhA</i> | Metabolism of Complex Carbohydrate:    | 10.669 | 9.991  | 8.537  | 11.242 | 2.93E-01 | 4.48E-02 | -0.68 | 2.71  |
| <i>lpg2994</i> | hypothetical (endonuclease?) uncharacterised protein family UPF010     |             | Unknown / hypothetical proteins        | 9.235  | 8.914  | 7.932  | 8.878  | 4.15E-01 | 2.87E-01 | -0.32 | 0.95  |
| <i>lpg2994</i> | hypothetical (endonuclease?) uncharacterised protein family UPF010     |             | Unknown / hypothetical proteins        | 9.246  | 9.258  | 7.796  | 8.746  | 9.83E-01 | 2.56E-01 | 0.01  | 0.95  |
| <i>lpg2995</i> | lipoprotein (exported protein)                                         |             | Named proteins of general function     | 10.228 | 10.113 | 9.353  | 11.958 | 6.62E-01 | 1.67E-04 | -0.11 | 2.61  |
| <i>lpg2995</i> | lipoprotein (exported protein)                                         |             | Named proteins of general function     | 9.311  | 9.963  | 9.293  | 11.945 | 5.32E-01 | 1.58E-04 | 0.65  | 2.65  |
| <i>lpg2996</i> | tetrapyrrole (corrin/porphyrin) methylase (hypothetical protein HI1654 |             | Metabolism of Cofactors and Vitamins   | 9.477  | 10.753 | 10.050 | 10.101 | 4.85E-02 | 9.22E-01 | 1.28  | 0.05  |
| <i>lpg2996</i> | tetrapyrrole (corrin/porphyrin) methylase (hypothetical protein HI1654 |             | Metabolism of Cofactors and Vitamins   | 9.378  | 10.326 | 9.729  | 9.905  | 1.14E-01 | 7.39E-01 | 0.95  | 0.18  |
| <i>lpg2997</i> | alkane-1-monooxygenase (alkane hydroxylase)                            |             | Named proteins of general function     | 9.577  | 10.141 | 9.863  | 9.586  | 4.33E-01 | 6.38E-01 | 0.56  | -0.28 |
| <i>lpg2997</i> | alkane-1-monooxygenase (alkane hydroxylase)                            |             | Named proteins of general function     | 9.249  | 10.616 | 8.599  | 10.277 | 1.08E-01 | 2.11E-01 | 1.37  | 1.68  |
| <i>lpg2998</i> | sulfate transporter (sulfate permease)                                 |             | Transport and binding                  | 10.577 | 9.645  | 10.594 | 9.838  | 1.24E-02 | 1.72E-01 | -0.93 | -0.76 |
| <i>lpg2998</i> | sulfate transporter (sulfate permease)                                 |             | Transport and binding                  | 10.764 | 9.864  | 10.763 | 10.446 | 1.26E-02 | 4.82E-01 | -0.90 | -0.32 |
| <i>lpg2999</i> | CG6763 gene product (eukaryotic homologs?)                             | <i>legP</i> | Unknown / hypothetical proteins        | 12.569 | 13.184 | 12.291 | 13.214 | 3.31E-01 | 3.11E-02 | 0.61  | 0.92  |
| <i>lpg2999</i> | CG6763 gene product (eukaryotic homologs?)                             | <i>legP</i> | Unknown / hypothetical proteins        | 12.638 | 13.571 | 12.483 | 13.678 | 2.21E-01 | 4.90E-02 | 0.93  | 1.20  |
| <i>lpg3000</i> | ORF                                                                    |             | ORFs of unknown function (unique)      | 11.798 | 14.605 | 11.445 | 13.177 | 4.13E-08 | 3.32E-07 | 2.81  | 1.73  |
| <i>lpg3000</i> | ORF                                                                    |             | ORFs of unknown function (unique)      | 11.763 | 14.588 | 11.451 | 13.183 | 2.86E-08 | 3.87E-07 | 2.83  | 1.73  |
| <i>lpg3001</i> | GTP binding protein in thiophene and furan oxidation (G1 <i>thdF</i>   |             | Named proteins of general function     | 10.392 | 7.242  | 8.600  | 7.902  | 6.93E-03 | 5.63E-01 | -3.15 | -0.70 |
| <i>lpg3001</i> | GTP binding protein in thiophene and furan oxidation (G1 <i>thdF</i>   |             | Named proteins of general function     | 10.197 | 7.780  | 8.106  | 7.708  | 3.28E-02 | 7.20E-01 | -2.42 | -0.40 |

|                |                                                   |             |                                        |        |        |        |        |          |          |       |      |
|----------------|---------------------------------------------------|-------------|----------------------------------------|--------|--------|--------|--------|----------|----------|-------|------|
| <i>lpg3002</i> | inner membrane protein, 60 kDa                    |             | Named proteins of general function     | 13.025 | 11.792 | 10.395 | 12.838 | 6.88E-02 | 6.91E-03 | -1.23 | 2.44 |
| <i>lpg3002</i> | inner membrane protein, 60 kDa                    |             | Named proteins of general function     | 13.042 | 11.832 | 10.060 | 12.863 | 7.35E-02 | 6.35E-03 | -1.21 | 2.80 |
| <i>lpg3003</i> | conserved hypothetical protein TIGR00278, COG0759 |             | Unknown / hypothetical proteins        | 13.325 | 10.593 | 9.455  | 11.957 | 1.18E-03 | 3.39E-02 | -2.73 | 2.50 |
| <i>lpg3003</i> | conserved hypothetical protein TIGR00278, COG0759 |             | Unknown / hypothetical proteins        | 13.142 | 11.145 | 9.927  | 12.798 | 4.37E-02 | 1.55E-02 | -2.00 | 2.87 |
| <i>lpg3004</i> | ribonuclease P protein component                  | <i>rnpA</i> | DNA/RNA degradation / restriction, Træ | 13.307 | 10.272 | 8.859  | 11.770 | 3.61E-03 | 1.66E-02 | -3.03 | 2.91 |
| <i>lpg3004</i> | ribonuclease P protein component                  | <i>rnpA</i> | DNA/RNA degradation / restriction, Træ | 13.431 | 10.131 | 8.547  | 11.575 | 1.53E-03 | 3.78E-02 | -3.30 | 3.03 |
| <i>lpg3005</i> | 50S ribosomal protein L34                         | <i>rpmH</i> | Translation                            | 12.338 | 10.980 | 9.537  | 12.268 | 4.92E-01 | 7.65E-03 | -1.36 | 2.73 |
| <i>lpg3005</i> | 50S ribosomal protein L34                         | <i>rpmH</i> | Translation                            | 12.643 | 10.814 | 9.144  | 12.316 | 2.77E-01 | 5.23E-03 | -1.83 | 3.17 |

† log<sub>2</sub> of all replicates averaged

\* log<sub>2</sub>
