# Supplementary material
Source: PubMed Central journal article supplement (PMC2668410)
Supplement: supp_191_8_2461__2.pdf [file supp_191_8_2461__2.pdf]

**Table S2. Genes affected by the mutation of *rpoS***

| ORF            | Product                                                   | Gene         | Ratio* <i>rpoS</i> | Ratio* <i>rpoS</i> |
|----------------|-----------------------------------------------------------|--------------|--------------------|--------------------|
|                |                                                           |              | E/Wt E             | PE/Wt PE           |
| <i>lpg0001</i> | chromosomal replication initiator protein DnaA            | <i>dnaA</i>  | 0.00               | 2.63               |
| <i>lpg0003</i> | DNA recombination and repair protein ATPase RecI          | -            | -2.20              | -0.87              |
| <i>lpg0005</i> | peptidylarginine deiminase                                | -            | -2.11              | 0.65               |
| <i>lpg0006</i> | biosynthetic arginine decarboxylase                       | <i>speA</i>  | -0.12              | 2.79               |
| <i>lpg0023</i> | transmembrane protein COG4539                             | -            | -0.23              | -3.94              |
| <i>lpg0026</i> | amino acid permease COG0531                               | -            | 2.04               | -1.08              |
| <i>lpg0028</i> | ubiquinone biosynthesis protein COQ7, central met         | -            | -0.60              | 2.70               |
| <i>lpg0049</i> | amino acid transporter, permease                          | -            | 3.35               | 4.00               |
| <i>lpg0052</i> | carboxyphosphoenolpyruvate phosphonmutase (c              | -            | 0.41               | 2.41               |
| <i>lpg0060</i> | methylase                                                 | -            | -4.67              | -0.41              |
| <i>lpg0064</i> | hypothetical                                              | -            | -3.64              | -0.64              |
| <i>lpg0065</i> | ORF                                                       | -            | -3.12              | -0.78              |
| <i>lpg0066</i> | carbamoyl phosphate synthase large chain (fusion          | -            | -3.54              | -1.52              |
| <i>lpg0069</i> | tRNA-Asn                                                  | -            | -0.40              | -2.02              |
| <i>lpg0073</i> | diguanylate cyclase/phosphodiesterase domain 2 (f         | -            | -1.46              | -4.08              |
| <i>lpg0074</i> | glutamate synthase                                        | -            | 0.06               | -3.01              |
| <i>lpg0083</i> | COG0189: glutathione synthase/ribosomal protein 5         | -            | 0.61               | 3.81               |
| <i>lpg0084</i> | hypothetical                                              | -            | -2.14              | 2.49               |
| <i>lpg0088</i> | glutamine ABC transporter (arginine 3rd transport s       | -            | 0.43               | -4.33              |
| <i>lpg0100</i> | UDP-3-O-[3-hydroxymyristoyl] glucosamine N-acylt          | -            | 0.52               | 2.72               |
| <i>lpg0104</i> | peptide methionine sulfoxide reductase                    | -            | -0.53              | 3.34               |
| <i>lpg0105</i> | (cytochrome oxidase?) (phosphatidylglycerophosph          | -            | 0.89               | 2.49               |
| <i>lpg0107</i> | hypothetical (membrane protein required for meiotic       | -            | 0.21               | 3.20               |
| <i>lpg0112</i> | hypothetical protein                                      | -            | 2.95               | 0.06               |
| <i>lpg0118</i> | glycine cleavage system T protein (aminomethyltra         | <i>gcvT1</i> | 2.02               | 2.50               |
| <i>lpg0124</i> | cytochrome c4                                             | -            | 1.89               | 2.57               |
| <i>lpg0126</i> | ninein (GSK3B interacting protein)                        | <i>cegC2</i> | 2.33               | 1.50               |
| <i>lpg0135</i> | SdhB                                                      | <i>sdhB</i>  | 0.41               | -2.79              |
| <i>lpg0137</i> | phosphoglycerate kinase                                   | <i>pgk</i>   | -0.49              | 2.29               |
| <i>lpg0138</i> | glyceraldehyde 3-phosphate dehydrogenase                  | <i>gap</i>   | 1.90               | 4.38               |
| <i>lpg0139</i> | transketolase I                                           | <i>tktA</i>  | 0.46               | 2.32               |
| <i>lpg0152</i> | hypothetical (GCN5-related N-acetylase, acetyltran:       | -            | 0.74               | 2.87               |
| <i>lpg0153</i> | small ORF (104aa)                                         | -            | -0.56              | -5.31              |
| <i>lpg0154</i> | ORF                                                       | -            | 2.34               | -1.32              |
| <i>lpg0156</i> | signal transduction protein (EAL/GGDEF domain pr          | -            | -0.20              | -2.05              |
| <i>lpg0163</i> | hydrolases of the alpha/beta superfamily                  | -            | 0.36               | -3.40              |
| <i>lpg0165</i> | conserved hypothetical protein                            | -            | 0.27               | -2.46              |
| <i>lpg0172</i> | ORF                                                       | -            | -1.53              | 2.26               |
| <i>lpg0175</i> | pyoverdine biosynthesis protein PvcB                      | -            | 2.10               | 2.76               |
| <i>lpg0176</i> | FAD monooxygenase, PheA/TfdB family (phenol 2-            | -            | 1.35               | 2.01               |
| <i>lpg0178</i> | hypothetical                                              | -            | -1.04              | 2.05               |
| <i>lpg0187</i> | <i>L. pneumophila</i> zinc metalloprotein (peptidase, M2C | -            | 1.07               | 2.28               |
| <i>lpg0194</i> | catalase/(hydro)peroxidase KatG                           | -            | 1.17               | 2.25               |
| <i>lpg0204</i> | 2-deoxy-D-gluconate-3-dehydrogenase (3-oxoacyl-           | -            | 2.84               | 3.26               |
| <i>lpg0219</i> | hypothetical                                              | -            | 2.20               | 2.42               |

|                |                                                       |             |       |       |
|----------------|-------------------------------------------------------|-------------|-------|-------|
| <i>lpg0220</i> | hypothetical                                          | -           | 2.04  | 1.44  |
| <i>lpg0227</i> | ORF                                                   | <i>ceg7</i> | 3.15  | -0.14 |
| <i>lpg0233</i> | benzoylformate decarboxylase                          | <i>mdlC</i> | -0.55 | -3.29 |
| <i>lpg0244</i> | pyridine nucleotide-disulfide oxidoreductase, FAD-d   | -           | -0.67 | -3.73 |
| <i>lpg0251</i> | RNA binding protein (cold-inducible) rrm              | -           | -2.10 | 0.40  |
| <i>lpg0251</i> | RNA binding protein (cold-inducible) rrm              | -           | -2.20 | 0.50  |
| <i>lpg0260</i> | small ORF (132aa)                                     | -           | -0.97 | 2.80  |
| <i>lpg0266</i> | small ORF (144aa)                                     | -           | 0.21  | 2.13  |
| <i>lpg0272</i> | cysteine transferase                                  | -           | 1.30  | 2.31  |
| <i>lpg0277</i> | sensory box protein (GGDEF family protein) LssE p     | -           | -1.33 | -2.38 |
| <i>lpg0285</i> | ORF                                                   | -           | 1.48  | 2.13  |
| <i>lpg0287</i> | translation elongation factor P (EF-P)                | <i>efp</i>  | 2.29  | 2.44  |
| <i>lpg0292</i> | ORF                                                   | -           | -0.12 | 2.00  |
| <i>lpg0295</i> | mannose-1-phosphate guanyltransferase (sugar ph       | -           | 1.83  | 2.78  |
| <i>lpg0296</i> | (phosphotransferase) hypothetical                     | -           | 0.52  | 4.09  |
| <i>lpg0308</i> | cell wall associated hydrolase, putative pseudogene   | -           | 2.63  | 0.57  |
| <i>lpg0311</i> | tRNA-Tyr                                              | -           | -0.14 | 4.29  |
| <i>lpg0312</i> | tRNA-Gly                                              | -           | 0.17  | 4.49  |
| <i>lpg0313</i> | tRNA-Thr                                              | -           | 0.58  | 3.30  |
| <i>lpg0314</i> | elongation factor Tu (EF-Tu)                          | <i>tuf2</i> | 0.54  | 2.53  |
| <i>lpg0316</i> | preprotein translocase, SecE subunit                  | <i>secE</i> | -0.67 | 3.40  |
| <i>lpg0317</i> | transcription antitermination protein NusG            | <i>nusG</i> | -0.74 | 3.06  |
| <i>lpg0320</i> | 50S ribosomal protein L10                             | <i>rplJ</i> | 0.08  | 3.38  |
| <i>lpg0321</i> | 50S ribosomal protein L7/L12                          | <i>rplL</i> | 0.66  | 4.94  |
| <i>lpg0325</i> | 30S ribosomal protein S7                              | <i>rpS7</i> | -0.46 | 2.02  |
| <i>lpg0328</i> | 30S ribosomal protein S10                             | <i>rpsJ</i> | 0.31  | 3.47  |
| <i>lpg0329</i> | 50S ribosomal protein L3                              | <i>rplC</i> | -0.39 | 2.61  |
| <i>lpg0335</i> | 30S ribosomal protein S3                              | <i>rpsC</i> | -1.48 | 2.34  |
| <i>lpg0336</i> | 50S ribosomal protein L16/(L10E)                      | <i>rplP</i> | -0.43 | 2.51  |
| <i>lpg0342</i> | 30S ribosomal protein S14                             | <i>rpsN</i> | -1.70 | 2.80  |
| <i>lpg0343</i> | 30S ribosomal protein S8                              | <i>rpsH</i> | -0.91 | 3.01  |
| <i>lpg0344</i> | 50S ribosomal protein L6/(L9E)                        | <i>rplF</i> | -0.65 | 3.03  |
| <i>lpg0345</i> | 50S ribosomal protein L18                             | <i>rplR</i> | -0.28 | 2.71  |
| <i>lpg0346</i> | 30S ribosomal protein S5                              | <i>rpsE</i> | 0.14  | 2.35  |
| <i>lpg0348</i> | 50S ribosomal protein L15                             | <i>rplO</i> | -1.80 | 2.34  |
| <i>lpg0349</i> | preprotein translocase (secretion protein SecY)       | <i>secY</i> | -2.89 | 2.01  |
| <i>lpg0352</i> | 30S ribosomal protein S11                             | <i>rpsK</i> | -1.14 | 2.89  |
| <i>lpg0353</i> | 30S ribosomal protein S4                              | <i>rpsD</i> | -0.20 | 2.69  |
| <i>lpg0362</i> | 3-oxoacyl-[acyl-carrier protein] synthase II (beta-ke | <i>fabF</i> | -2.77 | 0.50  |
| <i>lpg0369</i> | carboxylesterase/phospholipase                        | -           | 0.38  | 3.41  |
| <i>lpg0370</i> | oligoketide cyclase/lipid transporter protein COG281  | -           | -0.29 | 2.82  |
| <i>lpg0383</i> | small ORF (160aa) very weak lcmL homolog              | -           | -0.53 | -2.72 |
| <i>lpg0385</i> | LemA protein (cytoplasmic membrane protein)           | -           | -0.36 | -3.71 |
| <i>lpg0389</i> | ORF                                                   | -           | -2.22 | -1.34 |
| <i>lpg0392</i> | zinc metalloprotease (metal-dependent hydrolase)      | -           | -2.10 | -2.02 |
| <i>lpg0394</i> | COG0350 methylated DNA protein cysteine S-meth        | -           | -2.18 | 1.77  |
| <i>lpg0395</i> | 50S ribosomal protein L19                             | <i>rplS</i> | -2.24 | 1.59  |
| <i>lpg0396</i> | tRNA (guanine N1) methyltransferase                   | <i>trmD</i> | -2.44 | 2.63  |

|                |                                                          |               |       |       |
|----------------|----------------------------------------------------------|---------------|-------|-------|
| <i>lpg0397</i> | 16S rRNA processing protein RimM                         | <i>rimM</i>   | -2.60 | 4.41  |
| <i>lpg0399</i> | 30S ribosomal protein S16                                | <i>rpsP</i>   | -1.41 | 2.99  |
| <i>lpg0401</i> | ORF                                                      | -             | -0.17 | 2.53  |
| <i>lpg0415</i> | ORF                                                      | -             | 0.05  | -2.71 |
| <i>lpg0416</i> | glucose-6-phosphate-1-dehydrogenase                      | <i>zwf</i>    | -0.99 | -2.48 |
| <i>lpg0431</i> | ORF                                                      | -             | -2.42 | 1.03  |
| <i>lpg0436</i> | ORF                                                      | <i>legA11</i> | 2.14  | -1.76 |
| <i>lpg0438</i> | ORF                                                      | -             | -2.36 | 0.68  |
| <i>lpg0459</i> | IcmH (DotU)                                              | <i>icmH</i>   | -0.23 | 2.53  |
| <i>lpg0461</i> | ribosomal protein L11 methyltransferase                  | <i>prmA</i>   | -0.86 | 2.07  |
| <i>lpg0462</i> | acetyl CoA carboxylase, biotin carboxylase subunit       | <i>accC</i>   | -0.23 | 3.54  |
| <i>lpg0463</i> | acetyl CoA carboxylase, biotin carboxyl carrier prote    | -             | 1.00  | 2.76  |
| <i>lpg0467</i> | zinc metalloprotease (hemagglutinin/protease)            | -             | 1.60  | 2.57  |
| <i>lpg0469</i> | endonuclease/exonuclease/phosphatase family pro          | -             | -0.97 | -2.67 |
| <i>lpg0470</i> | fructose biphosphate aldolase                            | -             | 2.03  | 2.47  |
| <i>lpg0471</i> | phenol hydroxylase (ferredoxin-NADP reductase)           | <i>poxF</i>   | 1.12  | 3.08  |
| <i>lpg0474</i> | CDP-diacylglycerol-serine-O-phosphatidyltransfera        | -             | -0.62 | 2.06  |
| <i>lpg0476</i> | sigma-54 modulation protein                              | -             | -0.92 | -2.86 |
| <i>lpg0478</i> | 50S ribosomal protein L33                                | <i>rpL33</i>  | -0.03 | 4.02  |
| <i>lpg0479</i> | 50S ribosomal protein L28                                | <i>rpmB</i>   | -0.04 | 4.51  |
| <i>lpg0482</i> | endo-1,4 beta-glucanase or (deblocking) aminopep         | -             | 2.50  | 2.16  |
| <i>lpg0483</i> | ORF                                                      | <i>legA12</i> | 2.54  | 0.16  |
| <i>lpg0484</i> | HflK protein (phage lambda CII protease?)                | <i>hflK</i>   | -0.30 | 2.13  |
| <i>lpg0485</i> | HflC protein (phage lambda CII repressor?)               | <i>hflC</i>   | -0.26 | 2.92  |
| <i>lpg0486</i> | adenylosuccinate synthetase                              | <i>purA</i>   | 0.25  | 3.97  |
| <i>lpg0490</i> | arginine repressor (transcriptional regulator)           | -             | 3.80  | -1.08 |
| <i>lpg0491</i> | amino acid (glutamine) ABC transporter, periplasmi       | -             | 6.94  | 1.56  |
| <i>lpg0492</i> | amino acid (glutamine) ABC transporter, permease         | <i>yqiY</i>   | 6.20  | -0.87 |
| <i>lpg0493</i> | amino acid (glutamine) ABC transporter, ATP bindin       | -             | 6.17  | 1.17  |
| <i>lpg0494</i> | argininosuccinate synthase                               | <i>argG</i>   | 6.79  | 0.84  |
| <i>lpg0495</i> | argininosuccinate lyase                                  | <i>argH</i>   | 4.82  | -0.28 |
| <i>lpg0496</i> | ornithine carbamoyltransferase                           | <i>argF</i>   | 3.96  | 0.04  |
| <i>lpg0497</i> | adenosine deaminase                                      | -             | 2.20  | 1.87  |
| <i>lpg0499</i> | carboxy-terminal protease                                | -             | 0.21  | -2.30 |
| <i>lpg0503</i> | undecaprenyl diphosphate synthetase (undecapren          | <i>uppS</i>   | -0.19 | 2.64  |
| <i>lpg0506</i> | outer membrane protein (bacterial surface antigen f      | -             | -0.40 | 3.64  |
| <i>lpg0507</i> | outer membrane protein OmpH                              | -             | -0.04 | 2.70  |
| <i>lpg0508</i> | UDP-3-O-(3-hydroxymyristoyl) glucosamine N-aclyt         | <i>lpxD</i>   | 1.49  | 6.12  |
| <i>lpg0517</i> | COG0656: aldo/keto reductases, related to diketog        | <i>ytbE</i>   | 2.57  | 2.14  |
| <i>lpg0518</i> | ORF                                                      | -             | 2.06  | 0.95  |
| <i>lpg0525</i> | unknown virulence protein                                | -             | -0.97 | -2.16 |
| <i>lpg0527</i> | signal transduction protein (possible competence pi      | -             | -0.70 | -2.57 |
| <i>lpg0533</i> | dihydrolipoamide succinyltransferase (2-oxoglutaral      | <i>sucB</i>   | 2.36  | 1.59  |
| <i>lpg0536</i> | pyridoxamine 5'-phosphate oxidase                        | <i>pdxH</i>   | 0.93  | 2.87  |
| <i>lpg0540</i> | major facilitator family transporter (multidrug efflux t | -             | 1.47  | 2.02  |
| <i>lpg0541</i> | protein product; similar to probable membrane prote      | -             | 0.28  | 2.72  |
| <i>lpg0542</i> | DNA binding protein Fis (recombinational enhancer        | <i>fis</i>    | -0.48 | 2.36  |
| <i>lpg0543</i> | ribose-phosphate pyrophosphokinase (phosphoriboc         | <i>prsA</i>   | 0.34  | 2.13  |

|                |                                                           |              |       |       |
|----------------|-----------------------------------------------------------|--------------|-------|-------|
| <i>lpg0548</i> | phosphopantetheine adenylyltransferase (lipopolys:        | <i>kdtB</i>  | 0.18  | 2.88  |
| <i>lpg0549</i> | gamma-glutamyltranspeptidase                              | -            | -2.04 | 1.70  |
| <i>lpg0550</i> | hypothetical (FAD-dependent oxidoreductase)               | -            | -3.70 | -6.31 |
| <i>lpg0562</i> | hypothetical COG5394                                      | -            | 2.21  | 2.21  |
| <i>lpg0563</i> | ORF                                                       | -            | 2.90  | -0.03 |
| <i>lpg0568</i> | tyrosyl tRNA synthetase                                   | <i>tyrS</i>  | 2.22  | 2.42  |
| <i>lpg0579</i> | ORF                                                       | -            | 0.14  | 3.89  |
| <i>lpg0580</i> | adenosine deaminase                                       | <i>add</i>   | 1.19  | 3.18  |
| <i>lpg0584</i> | hypothetical (phosphate transport regulator?)             | -            | 1.24  | 2.71  |
| <i>lpg0585</i> | conserved hypothetical protein                            | -            | -0.93 | -2.79 |
| <i>lpg0586</i> | transcriptional regulator, alginate biosynthesis?         | -            | -0.39 | -4.10 |
| <i>lpg0589</i> | small ORF (128aa)                                         | -            | -2.10 | -4.91 |
| <i>lpg0592</i> | nitrogen regulatory P-II transcription regulator (nitro   | <i>glnK</i>  | 2.19  | 2.18  |
| <i>lpg0594</i> | ORF                                                       | -            | -0.10 | 2.53  |
| <i>lpg0595</i> | 4-amino-4-deoxychorismate lyase (branched chain           | -            | 0.20  | 3.62  |
| <i>lpg0597</i> | 2-acylglycerophosphoethanolamine acyltransferase          | <i>aas</i>   | -2.51 | -0.27 |
| <i>lpg0608</i> | hypothetical (SAM-dependent methyltransferase?)           | -            | -0.67 | 3.18  |
| <i>lpg0609</i> | alanyl tRNA synthetase                                    | <i>alaS</i>  | 4.19  | 3.81  |
| <i>lpg0610</i> | major facilitator family transporter (multidrug efflux t  | -            | 2.51  | 0.19  |
| <i>lpg0620</i> | conserved hypothetical protein                            | -            | -0.52 | -4.52 |
| <i>lpg0621</i> | SidA                                                      | <i>sidA</i>  | 2.44  | 0.58  |
| <i>lpg0622</i> | transmembrane protein                                     | -            | -2.36 | -1.79 |
| <i>lpg0623</i> | hypothetical                                              | -            | -1.12 | -3.04 |
| <i>lpg0625</i> | expressed protein                                         | -            | -1.37 | -4.19 |
| <i>lpg0626</i> | DNA uptake/competence protein ComA (DNA interr            | -            | 1.74  | -2.14 |
| <i>lpg0627</i> | type IV pilin (competence and adherence associate         | <i>pilE3</i> | -0.34 | -3.48 |
| <i>lpg0628</i> | type IV fimbrial biogenesis PilY1-related protein         | -            | 0.04  | -2.03 |
| <i>lpg0629</i> | Tfp pilus assembly protein PilX?                          | -            | 0.19  | -3.04 |
| <i>lpg0631</i> | type IV fimbrial biogenesis protein PilV                  | -            | -1.19 | -4.32 |
| <i>lpg0632</i> | type IV pre-pilin (type IV fimbrial pilin; fimbrial bioge | -            | -2.18 | -5.40 |
| <i>lpg0633</i> | polysaccharide deacetylase (peptidoglycan N-acety         | -            | -2.52 | -1.40 |
| <i>lpg0645</i> | partial RtxA                                              | -            | -0.84 | -2.13 |
| <i>lpg0650</i> | 50S ribosomal protein L31                                 | <i>rpmE</i>  | 0.38  | 3.80  |
| <i>lpg0653</i> | major facilitator family transporter (multidrug efflux t  | -            | -1.27 | 3.19  |
| <i>lpg0663</i> | soluble lytic murein transglycosylase                     | -            | -3.20 | -2.68 |
| <i>lpg0665</i> | putative transmembrane protein COG 2259                   | -            | -0.18 | -3.77 |
| <i>lpg0666</i> | conserved hypothetical protein                            | -            | -2.05 | -3.98 |
| <i>lpg0667</i> | conserved hypothetical protein                            | -            | -0.57 | -4.57 |
| <i>lpg0668</i> | bromodomain? protein-protein interactions? [overla        | -            | 0.64  | -3.03 |
| <i>lpg0669</i> | hypothetical exported protein [overlaps (different fra    | -            | 0.72  | -3.85 |
| <i>lpg0670</i> | hypothetical                                              | -            | -0.51 | -4.07 |
| <i>lpg0671</i> | NADH dehydrogenase transmembrane protein                  | <i>ndh</i>   | -0.88 | -5.43 |
| <i>lpg0672</i> | acetoacetate decarboxylase (ADC)                          | -            | -0.46 | -3.82 |
| <i>lpg0681</i> | lipoprotein, putative                                     | -            | -2.40 | -2.44 |
| <i>lpg0695</i> | hypothetical (inversin? alpha- or delta- latroinsectot    | <i>legA8</i> | -0.93 | -2.06 |
| <i>lpg0698</i> | hypothetical (ATPase)                                     | -            | -1.21 | 2.84  |
| <i>lpg0699</i> | outer membrane protein TolC (outer membrane cha           | -            | -0.63 | 3.43  |
| <i>lpg0700</i> | protein-L-isoaspartate-O-methyltransferase                | <i>pcm</i>   | 0.63  | 2.23  |

|                |                                                         |              |       |       |
|----------------|---------------------------------------------------------|--------------|-------|-------|
| <i>lpg0702</i> | threonine(-3-)dehydrogenase                             | <i>tdh</i>   | 2.45  | 2.22  |
| <i>lpg0709</i> | formiminoglutamase (arginase family protein)            | -            | 0.49  | 2.14  |
| <i>lpg0713</i> | oligopeptide transporter                                | -            | -2.03 | 0.45  |
| <i>lpg0717</i> | small ORF (153aa)                                       | -            | -0.56 | -3.26 |
| <i>lpg0719</i> | valyl tRNA synthase                                     | <i>valS</i>  | 1.62  | 4.30  |
| <i>lpg0721</i> | RND efflux membrane fusion protein (acriflavin resi     | -            | 0.92  | 2.35  |
| <i>lpg0722</i> | ORF hypothetical?                                       | -            | 1.74  | 4.06  |
| <i>lpg0727</i> | transcription termination factor NusB (nitrogen utiliz  | <i>nusB</i>  | -1.14 | 2.44  |
| <i>lpg0729</i> | phosphatidylglycerophosphatase A (PgpA)                 | <i>pgpA</i>  | 0.66  | -2.45 |
| <i>lpg0731</i> | hypothetical protein                                    | -            | 0.86  | 3.63  |
| <i>lpg0732</i> | hypothetical protein                                    | -            | 2.24  | 2.35  |
| <i>lpg0740</i> | 17kDa common antigen (17kDa surface antigen pre         | <i>omp</i>   | 2.22  | -0.50 |
| <i>lpg0741</i> | inosine-5'-monophosphate dehydrogenase (IMP de          | -            | -0.91 | -2.33 |
| <i>lpg0749</i> | imidazole glycerol phosphate synthase, cyclase suk      | <i>hisF</i>  | 2.36  | 3.22  |
| <i>lpg0752</i> | N-acetylneuraminic acid synthetase (N-acylneuram        | <i>nnaB1</i> | -2.18 | 1.45  |
| <i>lpg0754</i> | acetyltransferase (hexapeptide transferase) (serine     | -            | 0.95  | 2.44  |
| <i>lpg0755</i> | COG0399: Predicted pyridoxal phosphate-depende          | <i>yvfE</i>  | 1.14  | 3.48  |
| <i>lpg0756</i> | RmlC protein (dTDP-6-deoxy-D-glucose-3,5-epime          | -            | -2.14 | 0.12  |
| <i>lpg0758</i> | dTDP-glucose 4,6-dehydratase RmlB                       | <i>rfbB</i>  | -2.58 | 1.08  |
| <i>lpg0759</i> | glucose-6-phosphate isomerase                           | <i>pgi</i>   | -0.69 | 2.72  |
| <i>lpg0761</i> | NAD dependent epimerase/dehydratase; UDP-gluc           | -            | -2.54 | 0.32  |
| <i>lpg0762</i> | O-antigen initiating glycosyl transferase group 4-UC    | -            | -2.11 | 0.76  |
| <i>lpg0767</i> | hypothetical                                            | -            | -2.59 | -0.50 |
| <i>lpg0773</i> | polysaccharide ABC transporter, ATP binding protei      | -            | -2.65 | -0.42 |
| <i>lpg0774</i> | hypothetical ( <i>Legionella pneumophila</i> )          | -            | -2.75 | -0.18 |
| <i>lpg0779</i> | glycosyltransferase                                     | -            | -0.21 | 3.62  |
| <i>lpg0782</i> | O-antigen acetylase (lipopolysaccharide modificati      | -            | -2.16 | -0.51 |
| <i>lpg0788</i> | ORF                                                     | -            | -2.09 | 1.58  |
| <i>lpg0790</i> | L-serine dehydratase (iron, sulfur-dependent) (L-se     | <i>sda-2</i> | 2.06  | 1.29  |
| <i>lpg0792</i> | beta lactamase induction signal transducer AmpG         | <i>ampG</i>  | -2.85 | -0.81 |
| <i>lpg0797</i> | tRNA-Met                                                | -            | -2.31 | -0.29 |
| <i>lpg0801</i> | adenylsuccinate lyase                                   | -            | 0.34  | 3.23  |
| <i>lpg0810</i> | small ORF (105aa) competence protein ComEA (DI          | -            | 0.27  | 2.91  |
| <i>lpg0821</i> | lipopolysaccharide biosynthesis glycosyltransferase     | -            | 1.54  | 5.20  |
| <i>lpg0827</i> | agglutination protein, COG1538: membrane protein        | <i>tolC</i>  | 0.65  | 2.62  |
| <i>lpg0831</i> | flavin containing monooxygenase (dimethylaniline m      | -            | -0.02 | 2.93  |
| <i>lpg0841</i> | toluene tolerance ABC transporter, ATP binding pro      | -            | -0.93 | -2.60 |
| <i>lpg0843</i> | toluene tolerance protein Ttg2C (mce related protei     | -            | -0.52 | -2.99 |
| <i>lpg0847</i> | UDP-N-acetylglucosamine 1-carboxyvinyltransferas        | <i>murA</i>  | -0.65 | -2.02 |
| <i>lpg0848</i> | conserved hypothetical protein TIGR00486                | -            | -1.24 | -2.73 |
| <i>lpg0853</i> | transcriptional regulator FleQ (polar flagellar proteir | <i>fleQ</i>  | -1.75 | -2.81 |
| <i>lpg0854</i> | ORF                                                     | -            | -0.58 | -2.58 |
| <i>lpg0855</i> | signal peptide peptidase SppA (protease IV) (SohB       | -            | -0.94 | 2.72  |
| <i>lpg0858</i> | heme exporter protein CcmC                              | <i>ccmC</i>  | 0.87  | 2.90  |
| <i>lpg0864</i> | cytochrome c type biogenesis protein CcmH               | <i>cycH</i>  | 3.81  | 4.41  |
| <i>lpg0869</i> | 3-hydroxyisobutyryl Coenzyme A hydrolase (crotona       | -            | 2.11  | 2.69  |
| <i>lpg0872</i> | peptide chain release factor 3                          | <i>prfC</i>  | -0.84 | 2.06  |
| <i>lpg0874</i> | NAD(P) transhydrogenase (beta subunit)                  | <i>pntB</i>  | 0.01  | -2.14 |

|                |                                                      |               |       |       |
|----------------|------------------------------------------------------|---------------|-------|-------|
| <i>lpg0875</i> | transmembrane NAD(P) transhydrogenase (alpha s       | <i>pntAb2</i> | -0.33 | -2.92 |
| <i>lpg0877</i> | hypothetical transporter                             | -             | 2.99  | 2.09  |
| <i>lpg0878</i> | small ORF (99aa)                                     | -             | -1.42 | -5.48 |
| <i>lpg0891</i> | sensory box protein/GGDEF/EAL domains                | -             | 3.90  | 2.44  |
| <i>lpg0892</i> | kynurenine 3-monooxygenase (kynurenine 3-hydro:      | -             | -0.46 | -3.02 |
| <i>lpg0893</i> | hypothetical                                         | -             | -2.74 | -4.85 |
| <i>lpg0896</i> | lipoprotein (enhanced entry protein EnhC?) COG07     | -             | 2.10  | 2.44  |
| <i>lpg0901</i> | hypothetical protein NMA0899                         | -             | -1.87 | -4.72 |
| <i>lpg0902</i> | ORF                                                  | -             | 0.17  | -4.71 |
| <i>lpg0906</i> | hypothetical?                                        | -             | -0.13 | -2.88 |
| <i>lpg0908</i> | flagella basal body P-ring formation protein FlgA    | -             | -0.48 | -2.41 |
| <i>lpg0922</i> | electron transfer flavoprotein, beta subunit         | <i>etfB</i>   | -0.31 | 2.66  |
| <i>lpg0935</i> | universal stress protein A (UspA)                    | -             | -0.85 | -3.26 |
| <i>lpg0940</i> | LidA (translocated substrate of Dot/Icm system) (Us  | <i>lidA</i>   | 0.99  | -2.13 |
| <i>lpg0941</i> | ORF                                                  | -             | 0.86  | 2.77  |
| <i>lpg0946</i> | pyridoxal phosphate biosynthetic protein PdxJ (pyri  | <i>pdxJ</i>   | 1.90  | 2.91  |
| <i>lpg0953</i> | AMP-binding protein (long chain fatty acid-CoA liga: | -             | -1.22 | -3.40 |
| <i>lpg0963</i> | ORF                                                  | -             | 2.09  | -1.73 |
| <i>lpg0967</i> | ORF                                                  | -             | 0.61  | -2.87 |
| <i>lpg0968</i> | ORF                                                  | -             | 2.66  | -2.65 |
| <i>lpg0969</i> | ORF                                                  | -             | 3.76  | -2.06 |
| <i>lpg0976</i> | antirestriction protein                              | -             | 2.42  | 0.64  |
| <i>lpg0977</i> | single strand DNA binding protein (ssb)              | -             | 0.79  | 2.54  |
| <i>lpg0987</i> | membrane protein?                                    | -             | -0.35 | -2.16 |
| <i>lpg1007</i> | cation efflux system HelB (HlyD family secretion pro | -             | -0.73 | -2.62 |
| <i>lpg1011</i> | uncharacterized conserved protein                    | -             | -0.61 | -4.54 |
| <i>lpg1012</i> | small ORF (65aa)                                     | -             | 0.39  | -3.22 |
| <i>lpg1032</i> | conserved hypothetical protein                       | -             | -0.82 | -2.99 |
| <i>lpg1035</i> | copper efflux ATPase (copper resistance protein A)   | <i>pcoA</i>   | 2.63  | 3.84  |
| <i>lpg1048</i> | ATP synthase F1, subunit alpha (F0F1-type ATP sy     | -             | 2.61  | -0.76 |
| <i>lpg1055</i> | hypothetical protein                                 | -             | -0.37 | -2.31 |
| <i>lpg1060</i> | cold shock domain family protein, COG1278: cold s    | -             | 2.16  | 2.05  |
| <i>lpg1067</i> | small ORF (85aa)                                     | -             | -0.09 | -3.75 |
| <i>lpg1070</i> | integrase (phage related)                            | <i>int</i>    | 2.14  | 2.40  |
| <i>lpg1080</i> | deoxyguanosine triphosphate triphosphohydrolase      | -             | 1.73  | -3.53 |
| <i>lpg1084</i> | hypothetical (cytosolic protein)                     | -             | 2.12  | 0.42  |
| <i>lpg1094</i> | chemiosmotic efflux system B protein C (outer merr   | -             | -1.14 | -2.90 |
| <i>lpg1098</i> | small ORF (63aa)?                                    | -             | -0.32 | -4.57 |
| <i>lpg1112</i> | small ORF (127aa)                                    | -             | 0.86  | -3.97 |
| <i>lpg1113</i> | hypothetical                                         | -             | -0.77 | -3.39 |
| <i>lpg1115</i> | DNA integration/recombination/inversion protein (ci  | <i>kaiC2</i>  | 1.74  | -3.11 |
| <i>lpg1116</i> | chitinase (exochitinase) aminosugars metabolism?     | -             | 2.40  | -0.94 |
| <i>lpg1117</i> | small ORF (157aa) transcriptional repressor of spor  | <i>paiA</i>   | 0.83  | -2.50 |
| <i>lpg1118</i> | serine-type D-Ala-D-Ala carboxypeptidase (D-alany    | -             | 1.49  | -2.45 |
| <i>lpg1120</i> | hypothetical protein                                 | -             | -0.54 | 3.04  |
| <i>lpg1127</i> | acyl CoA synthetase, long chain fatty acid:CoA liga: | -             | -1.68 | -4.20 |
| <i>lpg1131</i> | cyclopropane fatty acid synthase (cyclopropane fatt  | <i>cfa</i>    | 0.03  | -2.06 |
| <i>lpg1134</i> | nitropropane dioxygenase/(trans-enoyl-CoA reducta    | -             | 0.12  | -2.97 |

|                |                                                        |              |       |       |
|----------------|--------------------------------------------------------|--------------|-------|-------|
| <i>lpg1138</i> | spermidine/putrescine-binding periplasmic protein F    | -            | -3.15 | -0.75 |
| <i>lpg1141</i> | spermidine/putrescine ABC transporter, ATP-binding     | -            | -5.45 | 0.40  |
| <i>lpg1143</i> | short chain type dehydrogenase/reductase (retinol c    | -            | -1.17 | -4.54 |
| <i>lpg1144</i> | ORF                                                    | <i>cegC3</i> | 2.07  | 0.11  |
| <i>lpg1145</i> | ORF                                                    | -            | 0.54  | -4.32 |
| <i>lpg1148</i> | ORF                                                    | -            | 1.15  | -2.31 |
| <i>lpg1151</i> | ORF                                                    | -            | -1.27 | -2.47 |
| <i>lpg1154</i> | ORF                                                    | -            | 1.29  | -5.34 |
| <i>lpg1157</i> | lipase B (conserved hypothetical protein-putative A1   | -            | -2.54 | -2.45 |
| <i>lpg1161</i> | phosphoribosyltransferase                              | -            | -0.87 | -3.23 |
| <i>lpg1167</i> | hypothetical (cytoplasmic protein)                     | -            | -2.49 | 1.23  |
| <i>lpg1177</i> | riboflavin biosynthesis protein RibD                   | <i>ribD</i>  | 1.37  | 3.60  |
| <i>lpg1183</i> | ORF                                                    | -            | 1.75  | -2.29 |
| <i>lpg1186</i> | competence lipoprotein ComL                            | -            | 1.12  | 2.37  |
| <i>lpg1188</i> | Kup system potassium uptake protein                    | <i>kup2</i>  | 0.51  | 2.81  |
| <i>lpg1193</i> | phosphoribosyl-ATP pyrophosphatase/phosphoribo         | <i>hisI</i>  | 0.94  | 2.44  |
| <i>lpg1194</i> | imidazoleglycerol-phosphate synthase, cyclase sub      | -            | 2.46  | 2.59  |
| <i>lpg1204</i> | orotate phosphoribosyltransferase                      | <i>pyrE</i>  | 1.21  | 2.14  |
| <i>lpg1206</i> | sigma 54 modulation protein YhbH                       | -            | 0.64  | -5.04 |
| <i>lpg1207</i> | conserved hypothetical protein COG2606                 | -            | -0.37 | -4.69 |
| <i>lpg1210</i> | acetyltransferase (ribosomal-protein alanine acetyl    | -            | -0.10 | 2.37  |
| <i>lpg1218</i> | flagellar basal body rod modification protein FlgD     | <i>flgD</i>  | 0.73  | -3.47 |
| <i>lpg1221</i> | flagellar basal body rod protein FlgG                  | <i>flgG</i>  | 0.04  | -3.10 |
| <i>lpg1223</i> | flagellar P-ring protein (precursor) FlgI              | <i>flgI</i>  | -0.28 | -2.12 |
| <i>lpg1226</i> | flagellar hook associated protein type 3 FlgL          | <i>flgL</i>  | -0.52 | -3.13 |
| <i>lpg1228</i> | hypothetical COG4804                                   | -            | 0.17  | 2.11  |
| <i>lpg1230</i> | hypothetical                                           | -            | 3.64  | 1.24  |
| <i>lpg1234</i> | hypothetical                                           | -            | -0.61 | -2.87 |
| <i>lpg1237</i> | type II restriction enzyme (Eco47II, Sau96I)           | -            | 1.16  | 4.59  |
| <i>lpg1249</i> | LvhB8 (conjugal transfer protein)                      | <i>virB8</i> | 2.21  | -1.18 |
| <i>lpg1258</i> | LvrB                                                   | <i>lvrB</i>  | 4.38  | 2.93  |
| <i>lpg1260</i> | phage repressor (putative repressor protein of prop    | <i>prpA</i>  | 1.77  | 3.64  |
| <i>lpg1270</i> | small ORF (152aa)                                      | -            | 0.59  | 3.91  |
| <i>lpg1274</i> | hypothetical                                           | -            | -3.31 | -6.60 |
| <i>lpg1279</i> | small ORF (123aa) hypothetical                         | -            | -0.43 | -2.49 |
| <i>lpg1280</i> | malate oxidoreductase (NAD linked malic enzyme)        | <i>sfcA</i>  | 0.67  | 2.98  |
| <i>lpg1285</i> | homogentisate 1,2-dioxygenase (homogentisicase)        | -            | 1.57  | 2.46  |
| <i>lpg1290</i> | hypothetical protein                                   | -            | -0.45 | -3.65 |
| <i>lpg1292</i> | DNA-binding response regulator (two component)         | -            | -0.94 | -2.14 |
| <i>lpg1293</i> | intracellular septation protein A                      | <i>ispZ</i>  | -1.85 | -2.60 |
| <i>lpg1298</i> | small ORF (65aa) weak eukaryotic hits?                 | -            | -0.80 | -3.83 |
| <i>lpg1303</i> | phosphoribosyl anthranilate isomerase (N-5'-phospl     | <i>trpF</i>  | -0.25 | 2.31  |
| <i>lpg1305</i> | tryptophan synthetase (alpha chain) TrpA               | <i>trpA</i>  | -0.84 | 3.10  |
| <i>lpg1307</i> | cysteinyl-tRNA synthetase                              | <i>cysS</i>  | -0.66 | 2.22  |
| <i>lpg1309</i> | small ORF (104aa)                                      | -            | 2.25  | 0.79  |
| <i>lpg1318</i> | ORF                                                    | -            | -1.07 | -6.10 |
| <i>lpg1338</i> | flagellar hook associated protein 2 (flagellar cap prc | <i>fliD</i>  | -0.07 | -3.83 |
| <i>lpg1346</i> | DNA polymerase III, delta subunit                      | <i>holA</i>  | 0.18  | 3.02  |

|                |                                                                          |             |       |       |
|----------------|--------------------------------------------------------------------------|-------------|-------|-------|
| <i>lpg1348</i> | leucyl tRNA synthetase                                                   | <i>leuS</i> | -0.04 | 3.34  |
| <i>lpg1355</i> | SidG, LepC, Vng0394c                                                     | <i>sidG</i> | -1.70 | -5.52 |
| <i>lpg1356</i> | TPR repeat protein (enhanced entry protein EnhC)                         | -           | 0.08  | -2.82 |
| <i>lpg1363</i> | type II protein secretion LspF (general secretion pa                     | <i>gspF</i> | 0.49  | 2.00  |
| <i>lpg1364</i> | glutamine synthetase, type I (glutamate-ammonia li                       | <i>glnA</i> | 2.54  | 2.50  |
| <i>lpg1368</i> | ORF                                                                      | -           | 0.13  | -5.27 |
| <i>lpg1370</i> | small ORF (98aa) DNA binding protein Fis (recomb                         | <i>fis</i>  | -0.98 | -2.76 |
| <i>lpg1374</i> | rod shape determining protein RodA                                       | <i>rodA</i> | -0.70 | -2.67 |
| <i>lpg1376</i> | hypothetical COG1576                                                     | -           | -2.18 | -0.60 |
| <i>lpg1377</i> | hypothetical COG0799                                                     | -           | -1.29 | -2.92 |
| <i>lpg1385</i> | small ORF (125aa)                                                        | -           | -0.33 | -5.23 |
| <i>lpg1386</i> | enhanced entry protein EnhA (ErfK/YbiS/YcfS/YnhC                         | -           | -0.89 | -4.98 |
| <i>lpg1387</i> | ORF                                                                      | -           | -0.50 | -4.33 |
| <i>lpg1391</i> | 50S ribosomal protein L32                                                | <i>rpmF</i> | 0.32  | 2.13  |
| <i>lpg1396</i> | acyl carrier protein (ACP)                                               | <i>acpP</i> | 0.07  | 2.50  |
| <i>lpg1398</i> | aminodeoxychorismate lyase (thymidylate kinase?)                         | -           | -3.93 | -1.64 |
| <i>lpg1401</i> | type 4 fimbrial biogenesis protein PilZ                                  | <i>pilZ</i> | -1.44 | -2.07 |
| <i>lpg1406</i> | glycosyltransferase (dolichol phosphate mannosyltr                       | -           | -3.31 | -1.52 |
| <i>lpg1418</i> | 3-phosphoserine aminotransferase (phosphoserine                          | <i>serC</i> | -2.58 | -0.66 |
| <i>lpg1419</i> | 3-phosphoshikimate 1-carboxyvinyltransferase (5-e                        | -           | -2.04 | 1.86  |
| <i>lpg1420</i> | cytidylate kinase                                                        | <i>cmk</i>  | -0.93 | 3.74  |
| <i>lpg1425</i> | orotidine 5'-phosphate decarboxylase PyrF                                | <i>pyrF</i> | -2.33 | 1.74  |
| <i>lpg1426</i> | hypothetical (serine protease?)                                          | <i>vpdC</i> | -2.62 | -1.07 |
| <i>lpg1427</i> | short chain dehydrogenase (3-oxoacyl [acyl carrier                       | -           | -2.40 | -2.36 |
| <i>lpg1428</i> | competence comG operon protein?, type 4 fimbrial                         | -           | -2.08 | -2.82 |
| <i>lpg1438</i> | transcriptional regulatory protein CpxR (DNA bindin                      | <i>cpxR</i> | -2.43 | -2.57 |
| <i>lpg1439</i> | Mg <sup>2+</sup> and Co <sup>2+</sup> transporter CorC (metal ion transp | -           | -2.94 | -4.11 |
| <i>lpg1440</i> | metal dependent hydrolase                                                | -           | -2.10 | -1.57 |
| <i>lpg1441</i> | phosphate starvation-inducible protein PhoH (ATP t                       | -           | -1.33 | -2.14 |
| <i>lpg1442</i> | metal dependent phosphoesterase (PHP family)                             | -           | -0.40 | 2.44  |
| <i>lpg1446</i> | hypothetical (transcriptional regulator) TIGR00281                       | -           | -2.10 | -1.27 |
| <i>lpg1455</i> | phospholipase C (phosphatidylcholine hydrolyzing)                        | -           | -1.14 | -4.27 |
| <i>lpg1460</i> | conserved hypothetical protein                                           | -           | -1.07 | 2.37  |
| <i>lpg1464</i> | NTP pyrophosphohydrolase (mutator protein MutT)                          | -           | -2.02 | -0.57 |
| <i>lpg1468</i> | small ORF (157aa)                                                        | -           | 2.06  | -0.97 |
| <i>lpg1476</i> | hypothetical (type I antifreeze protein?) COG2331                        | -           | 1.30  | 2.07  |
| <i>lpg1482</i> | ORF                                                                      | -           | 2.27  | 1.00  |
| <i>lpg1484</i> | ORF                                                                      | -           | 2.44  | 2.05  |
| <i>lpg1490</i> | adenylate cyclase PLUS two component hybrid sen                          | <i>cyaA</i> | -1.28 | -5.06 |
| <i>lpg1491</i> | ORF                                                                      | -           | 0.14  | -3.11 |
| <i>lpg1495</i> | small ORF (97aa)                                                         | -           | 2.26  | -2.04 |
| <i>lpg1496</i> | ORF                                                                      | -           | -0.36 | -5.65 |
| <i>lpg1497</i> | aminopeptidase N                                                         | <i>pepN</i> | -0.99 | -4.10 |
| <i>lpg1501</i> | GCN5-related N-acetyltransferase (ribosomal prote                        | -           | -2.15 | -1.75 |
| <i>lpg1510</i> | D-alanine-aminotransferase (D-aspartate aminotrar                        | -           | -2.91 | 1.15  |
| <i>lpg1512</i> | DedA/PAP2 domain protein (integral membrane prc                          | -           | -2.75 | -0.44 |
| <i>lpg1515</i> | toxin secretion ATP binding protein (ABC-type bacte                      | -           | -2.01 | -3.99 |
| <i>lpg1516</i> | ABC transporter, ATP binding/permease fusion prot                        | -           | -2.72 | -2.82 |



|                |                                                        |             |       |       |
|----------------|--------------------------------------------------------|-------------|-------|-------|
| <i>lpg1517</i> | HlyD family secretion protein (hemolysin) (type I s    | -           | -2.38 | -2.73 |
| <i>lpg1518</i> | sensory box protein/GGDEF domain/EAL domain (t         | -           | -1.22 | -3.77 |
| <i>lpg1520</i> | uncharacterized conserved hypothetical protein CO      | -           | -0.56 | 2.17  |
| <i>lpg1522</i> | (type IV) pilus assembly protein PilB                  | <i>pilB</i> | -1.22 | -4.13 |
| <i>lpg1523</i> | (type IV) pilus assembly protein PilC (bacterial type  | <i>pilC</i> | -1.12 | -3.52 |
| <i>lpg1524</i> | type 4 (IV) prepilin-like protein leader peptide proce | <i>pilD</i> | -1.63 | -2.27 |
| <i>lpg1526</i> | ORF                                                    | -           | -1.45 | -2.65 |
| <i>lpg1529</i> | 2-methylcitrate dehydratase PrpD                       | <i>prpD</i> | 2.93  | 3.77  |
| <i>lpg1538</i> | poly(A) polymerase I (tRNA nucleotidyltransferase/     | <i>pcnB</i> | -4.52 | -0.99 |
| <i>lpg1541</i> | GTP-binding protein EngA                               | <i>engA</i> | 0.10  | 2.94  |
| <i>lpg1548</i> | nucleoside diphosphate kinase                          | <i>ndk</i>  | 0.70  | 3.75  |
| <i>lpg1551</i> | ORF                                                    | -           | 0.77  | -2.90 |
| <i>lpg1552</i> | UDP-2,3-diacylglucosamine hydrolase                    | -           | -2.18 | 0.82  |
| <i>lpg1564</i> | membrane protein (nodulin 21?)                         | -           | -1.30 | -2.64 |
| <i>lpg1577</i> | RNA polymerase sigma E factor RpoE (RNA polym          | <i>rpoE</i> | -1.50 | -4.93 |
| <i>lpg1578</i> | small ORF (149aa)                                      | -           | -2.78 | -0.55 |
| <i>lpg1580</i> | cytochrome b-561 transmembrane protein                 | -           | -2.21 | -2.72 |
| <i>lpg1586</i> | small ORF (125aa)                                      | -           | -2.07 | -2.29 |
| <i>lpg1591</i> | 30S ribosomal protein S18                              | <i>rpsR</i> | -0.49 | 2.47  |
| <i>lpg1592</i> | 30S ribosomal protein S6                               | <i>rpsF</i> | -0.19 | 3.49  |
| <i>lpg1605</i> | hypothetical                                           | -           | 3.33  | 1.05  |
| <i>lpg1613</i> | acetyltransferase, GNAT family                         | -           | 2.35  | 1.96  |
| <i>lpg1614</i> | glutamate rich protein GrpB                            | <i>yqkA</i> | 2.16  | -0.72 |
| <i>lpg1622</i> | ORF                                                    | -           | -1.12 | -2.13 |
| <i>lpg1623</i> | hydrogenase                                            | -           | 1.58  | 3.36  |
| <i>lpg1631</i> | chalcone and stilbene synthases (3-oxoacyl[ACP]s)      | -           | 2.35  | 0.57  |
| <i>lpg1635</i> | dienelactone hydrolase                                 | -           | -1.64 | -4.48 |
| <i>lpg1636</i> | acetyltransferase, GNAT family (GCN5-related N-ac      | -           | -0.51 | -3.51 |
| <i>lpg1637</i> | polysaccharide deacetylase (chitooligosaccharide d     | -           | 0.99  | -2.10 |
| <i>lpg1639</i> | ORF                                                    | -           | -1.12 | -4.71 |
| <i>lpg1644</i> | ORF                                                    | -           | -1.02 | -2.47 |
| <i>lpg1646</i> | cytochrome b561 transmembrane protein (secretor)       | -           | -0.69 | -2.58 |
| <i>lpg1647</i> | hypothetical (exported protein)                        | -           | -1.64 | -3.39 |
| <i>lpg1648</i> | signal peptide protein (integral membrane or export    | -           | -1.12 | -4.23 |
| <i>lpg1655</i> | class 4 metalloprotease (zinc metalloprotease) (viru   | <i>lasB</i> | -1.45 | -2.10 |
| <i>lpg1659</i> | membrane protein                                       | -           | -1.20 | -3.03 |
| <i>lpg1664</i> | penicillin binding protein 1C, peptidoglycan biosynt   | -           | 1.56  | 2.51  |
| <i>lpg1667</i> | conserved hypothetical protein                         | -           | -1.06 | -2.92 |
| <i>lpg1669</i> | alpha-amylase, putative                                | -           | 1.27  | -5.30 |
| <i>lpg1670</i> | ORF                                                    | -           | 1.52  | -3.21 |
| <i>lpg1672</i> | phosphoribosylglycinamide formyltransferase (phos      | -           | -2.14 | -1.75 |
| <i>lpg1673</i> | phosphoribosylamine-glycine ligase (GARS) (glycin      | -           | -1.11 | -2.30 |
| <i>lpg1675</i> | phosphoribosylimidazole-succinocarboxamide synt        | -           | -2.04 | -1.18 |
| <i>lpg1680</i> | thiol:disulfide interchange protein DsbD               | <i>dsbD</i> | 0.97  | -2.48 |
| <i>lpg1684</i> | ORF                                                    | -           | 2.60  | -0.70 |
| <i>lpg1695</i> | transposase IS630 family                               | -           | 1.20  | 2.57  |
| <i>lpg1698</i> | (ProQ, activator of ProP osmoprotectant transport      | -           | 1.45  | 2.32  |
| <i>lpg1699</i> | 3-demethylubiquinone-9 3-methyltransferase UbiG        | <i>ubiG</i> | 0.81  | 2.43  |

|                |                                                           |                   |       |       |
|----------------|-----------------------------------------------------------|-------------------|-------|-------|
| <i>lpg1702</i> | Tpr                                                       | -                 | 2.04  | -2.27 |
| <i>lpg1713</i> | translation elongation factor Ts (EF-Ts) (ubiquitin as    | <i>tsf</i>        | -0.44 | 2.50  |
| <i>lpg1714</i> | 30S ribosomal protein S2                                  | <i>rpsB</i>       | 0.36  | 3.59  |
| <i>lpg1718</i> | huntingtin interacting protein B                          | <i>legAS4</i>     | 2.16  | -0.96 |
| <i>lpg1719</i> | methionine aminopeptidase                                 | <i>map</i>        | -0.27 | 2.75  |
| <i>lpg1721</i> | deaminase (zinc binding protein) (zinc binding hydr       | <i>yfhC</i>       | -0.59 | -2.14 |
| <i>lpg1726</i> | oxidoreductase, acyl CoA dehydrogenase family (ar         | <i>yafH</i>       | -0.23 | -2.15 |
| <i>lpg1727</i> | hydrolase                                                 | -                 | -2.11 | 0.86  |
| <i>lpg1738</i> | ORF                                                       | -                 | -0.26 | 2.29  |
| <i>lpg1743</i> | Fis transcriptional activator (factor for inversion stirr | <i>fis</i>        | 2.55  | 1.49  |
| <i>lpg1751</i> | ORF                                                       | -                 | 3.05  | 1.54  |
| <i>lpg1755</i> | transmembrane protein (protease?)                         | -                 | -2.57 | 0.75  |
| <i>lpg1765</i> | outer membrane lipoprotein carrier protein (periplas      | <i>lolA</i>       | 0.17  | -2.69 |
| <i>lpg1778</i> | peptide chain release factor 2 (RF-2)                     | <i>prfB</i>       | 0.63  | 2.40  |
| <i>lpg1779</i> | hypothetical                                              | -                 | -0.92 | -2.43 |
| <i>lpg1781</i> | flagellar motor protein MotA (chemotaxis MotA prote       | <i>motA</i>       | -0.82 | -4.33 |
| <i>lpg1782</i> | flagellar biosynthesis sigma factor FliA (motility sign   | <i>fliA</i>       | -0.27 | -4.95 |
| <i>lpg1783</i> | flagellar biosynthesis MinD (septum-site determinin       | -                 | -0.30 | -2.27 |
| <i>lpg1784</i> | flagellar GTP-binding protein FliH (flagellar biosynt     | -                 | -0.05 | -4.24 |
| <i>lpg1787</i> | flagellar biosynthetic protein FliR                       | <i>fliR</i>       | -0.38 | -3.23 |
| <i>lpg1796</i> | transcriptional regulator, LysR family                    | -                 | -1.86 | -3.19 |
| <i>lpg1811</i> | aspartokinase (aspartate kinase, lysine sensitive)        | <i>lysC</i>       | 1.73  | 3.48  |
| <i>lpg1812</i> | ATP-dependent DNA helicase (UvrD/Rep helicase)            | -                 | -2.31 | 0.63  |
| <i>lpg1819</i> | ABC transporter, ATP binding/permease protein Ms          | -                 | -2.31 | 1.43  |
| <i>lpg1836</i> | coiled coil domain protein                                | <i>ceg25</i>      | 2.21  | 0.72  |
| <i>lpg1839</i> | glycyl tRNA synthetase, beta subunit                      | <i>glyS</i>       | -1.00 | 2.55  |
| <i>lpg1840</i> | glycyl tRNA synthetase, alpha subunit                     | <i>glyQ</i>       | -0.38 | 2.46  |
| <i>lpg1845</i> | lipoprotein VacJ, peptidoglycan stabilization, virulen    | <i>vacJ</i>       | -0.27 | 2.07  |
| <i>lpg1852</i> | alkaline phosphatase (alkaline phosphomonoestera          | -                 | 1.44  | 4.07  |
| <i>lpg1853</i> | uridine kinase (uridine/cytidine kinase)                  | <i>udk</i>        | -0.54 | 3.52  |
| <i>lpg1862</i> | trigger factor TF (FKBP-type peptidyl prolyl cis-trans    | <i>tig</i>        | -0.41 | 2.20  |
| <i>lpg1865</i> | tRNA-Arg                                                  | -                 | -2.88 | -0.12 |
| <i>lpg1869</i> | ribonuclease III (dsRNA-specific ribonuclease) (RN.       | <i>rnc</i>        | -2.83 | -0.47 |
| <i>lpg1876</i> | ORF                                                       | -                 | -0.82 | -5.65 |
| <i>lpg1884</i> | Microtubule binding protein, putative                     | <i>legC2/yIfE</i> | -1.57 | -2.20 |
| <i>lpg1887</i> | ORF                                                       | -                 | 0.58  | -3.10 |
| <i>lpg1889</i> | lipase (triacylglycerol lipase)                           | -                 | -0.19 | -4.00 |
| <i>lpg1890</i> | galA protein 1                                            | <i>legLC8</i>     | 3.45  | 0.45  |
| <i>lpg1891</i> | hypothetical protein HI1736                               | -                 | -0.13 | -2.14 |
| <i>lpg1893</i> | major facilitator family transporter (multidrug efflux t  | -                 | 0.50  | 2.56  |
| <i>lpg1898</i> | methanol dehydrogenase regulatory protein (MoxR           | -                 | -1.22 | -2.99 |
| <i>lpg1899</i> | transmembrane protein                                     | -                 | -0.49 | -3.03 |
| <i>lpg1901</i> | conserved hypothetical protein                            | -                 | 0.54  | 2.37  |
| <i>lpg1903</i> | hydrolase (esterase/lipase/thioesterase)                  | -                 | 0.74  | -4.76 |
| <i>lpg1905</i> | ectonucleoside triphosphate diphosphohydrolase I (        | -                 | 2.19  | 2.93  |
| <i>lpg1911</i> | glutamate tRNA synthetase catalytic subunit (glutan       | <i>gltX</i>       | -0.14 | 2.53  |
| <i>lpg1914</i> | fimbrial protein, type IV pilin, PilE                     | <i>pilE</i>       | -0.71 | -4.22 |
| <i>lpg1915</i> | Tfp pilus assembly protein, major type IV pilin class     | <i>pilE</i>       | -0.16 | -3.98 |

|                |                                                      |                |       |       |
|----------------|------------------------------------------------------|----------------|-------|-------|
| <i>lpg1918</i> | ORF                                                  | -              | 2.59  | -1.21 |
| <i>lpg1922</i> | ATP dependent DNA helicase (DEAD box family) R       | -              | 2.64  | 1.57  |
| <i>lpg1926</i> | hypothetical protein                                 | -              | -0.40 | -4.44 |
| <i>lpg1948</i> | FLJ00180 protein                                     | <i>legLC4</i>  | 3.29  | -0.56 |
| <i>lpg1949</i> | hypothetical protein                                 | -              | -1.43 | -2.85 |
| <i>lpg1950</i> | guanine nucleotide exchange protein (RalF) (ADP r    | <i>ralF</i>    | -0.29 | -2.96 |
| <i>lpg1955</i> | hypothetical (gluconate permease?) (transport prote  | -              | 1.40  | 2.93  |
| <i>lpg1956</i> | chloromuconate cycloisomerase (mandelate racem.      | -              | 1.56  | 3.43  |
| <i>lpg1960</i> | ORF                                                  | -              | 0.91  | -4.15 |
| <i>lpg1963</i> | hypothetical protein                                 | -              | -1.56 | -5.22 |
| <i>lpg1972</i> | small ORF (125aa)                                    | -              | 3.08  | -0.32 |
| <i>lpg1976</i> | UVB-resistance protein UVR8                          | <i>legG1</i>   | 3.77  | 0.43  |
| <i>lpg1981</i> | small ORF (98aa)                                     | -              | 2.05  | 2.37  |
| <i>lpg1988</i> | dihydrofolate reductase                              | -              | 0.82  | 2.46  |
| <i>lpg1993</i> | polysaccharide deacetylase                           | -              | -1.52 | -4.13 |
| <i>lpg1997</i> | small ORF (104aa)                                    | -              | -0.85 | 2.54  |
| <i>lpg2001</i> | protein export protein SecD (preprotein translocase  | <i>secD</i>    | -0.67 | 3.33  |
| <i>lpg2002</i> | transmembrane protein YajC, preprotein translocas    | <i>yajC</i>    | -0.22 | 2.09  |
| <i>lpg2006</i> | ABC transporter ATP binding protein                  | <i>uup-A</i>   | 0.65  | 2.07  |
| <i>lpg2012</i> | ribonuclease PH (RNase PH)                           | <i>rph</i>     | 0.76  | 2.23  |
| <i>lpg2016</i> | hypothetical (YGGT family protein) (transmembrane    | -              | 0.52  | 2.54  |
| <i>lpg2017</i> | ORF                                                  | -              | -0.18 | -2.26 |
| <i>lpg2018</i> | hypothetical protein                                 | -              | -1.59 | -2.14 |
| <i>lpg2029</i> | dihydroneopterin aldolase FolB, kinase? COG1539      | -              | 2.03  | 0.93  |
| <i>lpg2031</i> | arginyl tRNA synthetase                              | <i>argS</i>    | 0.91  | 2.84  |
| <i>lpg2036</i> | Maf-like protein (septum formation) (nucleotide binc | -              | -3.02 | 0.55  |
| <i>lpg2046</i> | ABC transporter, ATP binding protein                 | -              | 0.61  | 2.14  |
| <i>lpg2051</i> | isopentenyl-diphosphate delta-isomerase (IPP isom    | -              | 0.91  | 2.70  |
| <i>lpg2054</i> | tRNA-Lys                                             | -              | -0.15 | 2.52  |
| <i>lpg2057</i> | Prophage dlp12 integrase (prophage qsr' integrase)   | <i>intD</i>    | -0.91 | -2.12 |
| <i>lpg2106</i> | conserved hypothetical protein                       | -              | -2.81 | 0.74  |
| <i>lpg2113</i> | ATP dependent DNA helicase?                          | <i>recG</i>    | -0.57 | -2.87 |
| <i>lpg2121</i> | cold shock DNA binding domain protein (cold shock    | -              | -4.92 | -2.31 |
| <i>lpg2123</i> | cobalt zinc cadmium cation transporter (membrane     | -              | -1.19 | -2.80 |
| <i>lpg2125</i> | small ORF (153aa) transmembrane transport protei     | -              | -0.25 | -2.13 |
| <i>lpg2127</i> | hypothetical COG3034                                 | -              | 2.69  | -1.78 |
| <i>lpg2128</i> | ORF                                                  | -              | 0.56  | 3.85  |
| <i>lpg2138</i> | transcriptional regulator, LysR family               | -              | -0.41 | -2.75 |
| <i>lpg2143</i> | ORF                                                  | -              | -0.81 | -2.92 |
| <i>lpg2144</i> | F-box protein?                                       | <i>legAU13</i> | 0.53  | -3.11 |
| <i>lpg2147</i> | ORF                                                  | -              | -0.68 | -3.56 |
| <i>lpg2149</i> | ORF                                                  | -              | 1.32  | -2.84 |
| <i>lpg2153</i> | SdeC, SdeB, AliA, SdeA, SdeD homology                | <i>sdeC</i>    | 0.76  | -2.90 |
| <i>lpg2154</i> | SdeC, SdeB, AliA, SdeA, SdeD homology                | -              | 4.48  | 0.45  |
| <i>lpg2155</i> | ORF                                                  | <i>sidJ</i>    | -0.80 | -2.84 |
| <i>lpg2157</i> | SdeA, IMH1; Encodes a protein implicated in protei   | <i>sdeA</i>    | 0.17  | -3.27 |
| <i>lpg2160</i> | ORF                                                  | -              | 2.28  | 2.44  |
| <i>lpg2166</i> | hypothetical protein                                 | -              | 1.67  | 3.47  |

|                |                                                                             |                   |       |       |
|----------------|-----------------------------------------------------------------------------|-------------------|-------|-------|
| <i>lpg2171</i> | hypothetical conserved protein                                              | -                 | 2.71  | 1.37  |
| <i>lpg2174</i> | tRNA-Lys                                                                    | -                 | 1.59  | 3.60  |
| <i>lpg2175</i> | (2-pyrone-4,6-)dicarboxylic acid hydrolase                                  | -                 | 0.08  | -2.97 |
| <i>lpg2176</i> | sphingosine-1-phosphate lyase I (group II decarbox                          | <i>legS2</i>      | -1.18 | 3.77  |
| <i>lpg2177</i> | HlyD family secretion protein (RND multidrug efflux                         | -                 | -0.93 | -3.14 |
| <i>lpg2180</i> | sensory box histidine kinase/response regulator (ae                         | -                 | -0.64 | -3.20 |
| <i>lpg2181</i> | sensory box sensor histidine kinase/response regul                          | -                 | 0.15  | -5.60 |
| <i>lpg2185</i> | small ORF (102aa)                                                           | -                 | 2.16  | 1.14  |
| <i>lpg2187</i> | small ORF (133aa)                                                           | -                 | -0.08 | -3.44 |
| <i>lpg2191</i> | global stress protein GspA (heat shock protein 16 k                         | <i>ib</i>         | 0.40  | -2.29 |
| <i>lpg2199</i> | ORF                                                                         | -                 | 2.72  | 1.03  |
| <i>lpg2201</i> | replication factor C subunit (activator I)                                  | -                 | -0.42 | -2.49 |
| <i>lpg2209</i> | hypothetical (phosphatidylethanolamine-binding pro                          | -                 | -1.07 | -5.52 |
| <i>lpg2213</i> | hemin binding protein Hbp                                                   | -                 | 0.69  | 2.84  |
| <i>lpg2216</i> | purine NTPase, putative                                                     | -                 | 0.20  | -2.38 |
| <i>lpg2222</i> | TPR repeat protein, protein-protein interaction                             | -                 | 2.28  | -3.97 |
| <i>lpg2233</i> | acyl carrier protein                                                        | -                 | 0.43  | 2.10  |
| <i>lpg2239</i> | ORF                                                                         | -                 | -2.72 | -4.28 |
| <i>lpg2245</i> | C4-dicarboxylate transport protein (Na <sup>+</sup> /H <sup>+</sup> dicarbo | <i>dctA</i>       | 2.27  | -1.28 |
| <i>lpg2246</i> | ORF                                                                         | -                 | 2.46  | -4.96 |
| <i>lpg2255</i> | ORF                                                                         | -                 | -0.34 | -2.80 |
| <i>lpg2258</i> | small ORF (96aa) hypothetical                                               | -                 | -0.87 | -2.66 |
| <i>lpg2268</i> | ORF                                                                         | -                 | -0.59 | -3.99 |
| <i>lpg2277</i> | O-methyltransferase, SAM-dependent                                          | -                 | 0.90  | 2.22  |
| <i>lpg2282</i> | asparaginyl tRNA synthetase                                                 | <i>asnS</i>       | -0.09 | 3.16  |
| <i>lpg2284</i> | ABC transporter, ATP binding protein (lipoprotein re                        | -                 | 1.37  | 3.30  |
| <i>lpg2285</i> | lipoprotein ABC transporter (permease) (lipoprotein                         | -                 | 1.14  | 2.78  |
| <i>lpg2292</i> | tRNA-Gly                                                                    | -                 | -2.73 | -0.25 |
| <i>lpg2296</i> | ORF                                                                         | -                 | -2.53 | 3.08  |
| <i>lpg2297</i> | ribonuclease E                                                              | <i>rne</i>        | 2.32  | 0.05  |
| <i>lpg2298</i> | inclusion membrane protein A                                                | <i>legC7/yifA</i> | -0.50 | 3.00  |
| <i>lpg2302</i> | aspartate semialdehyde dehydrogenase                                        | <i>asd</i>        | 2.38  | 1.09  |
| <i>lpg2304</i> | adenine specific methylase                                                  | -                 | 1.74  | 3.54  |
| <i>lpg2310</i> | glutamate racemase                                                          | <i>murl</i>       | -0.43 | -3.33 |
| <i>lpg2312</i> | small ORF (100aa)                                                           | -                 | 1.00  | -3.50 |
| <i>lpg2316</i> | 3-hydroxybutyrate dehydrogenase (D-beta hydroxyl                            | <i>bdhA</i>       | 0.01  | -3.44 |
| <i>lpg2317</i> | transmembrane protein                                                       | -                 | -0.44 | -3.89 |
| <i>lpg2318</i> | chemotaxis (motility protein A) transmembrane (pro                          | <i>motA</i>       | -1.02 | -2.62 |
| <i>lpg2321</i> | serine transporter                                                          | <i>sdaC</i>       | 1.96  | 2.26  |
| <i>lpg2323</i> | type II secretion system protein (twitching motility pi                     | <i>uptC</i>       | -0.07 | -4.38 |
| <i>lpg2327</i> | CG18304 gene product                                                        | -                 | 1.53  | -4.36 |
| <i>lpg2330</i> | geranyltranstransferase (farnesyl-diphosphate syntl                         | <i>ispA</i>       | -0.40 | 3.27  |
| <i>lpg2334</i> | ORF                                                                         | -                 | -0.30 | -3.81 |
| <i>lpg2339</i> | ORF                                                                         | -                 | -2.54 | 0.17  |
| <i>lpg2344</i> | ORF                                                                         | -                 | 4.00  | 6.78  |
| <i>lpg2348</i> | superoxide dismutase (copper-zinc)                                          | <i>sodC</i>       | -0.14 | -2.86 |
| <i>lpg2351</i> | ORF                                                                         | -                 | -0.93 | -4.23 |
| <i>lpg2358</i> | 30S ribosomal protein S21                                                   | <i>rpsU</i>       | -0.77 | 3.68  |

|                |                                                        |                  |       |       |
|----------------|--------------------------------------------------------|------------------|-------|-------|
| <i>lpg2359</i> | conserved hypothetical protein                         | -                | -0.68 | 2.74  |
| <i>lpg2376</i> | transcriptional regulator, LysR family                 | -                | -0.76 | -3.02 |
| <i>lpg2385</i> | hypothetical protein                                   | -                | -0.19 | -3.13 |
| <i>lpg2393</i> | bacterioferritin (cytochrome b1)                       | -                | -1.55 | -3.79 |
| <i>lpg2395</i> | ORF                                                    | -                | 2.36  | -4.95 |
| <i>lpg2398</i> | aminoglycoside 6'-N-acetyltransferase                  | -                | -2.18 | -2.52 |
| <i>lpg2399</i> | unknown virulence protein                              | -                | -0.61 | -4.51 |
| <i>lpg2409</i> | ORF                                                    | <i>ceg29</i>     | 2.99  | 1.38  |
| <i>lpg2410</i> | hypothetical (serine protease?) (membrane spannin      | <i>vpdA</i>      | 1.76  | -2.33 |
| <i>lpg2411</i> | ORF                                                    | -                | 3.51  | 2.76  |
| <i>lpg2413</i> | small ORF (145aa)                                      | -                | 1.20  | -2.90 |
| <i>lpg2415</i> | transmembrane protein                                  | -                | -0.41 | -4.21 |
| <i>lpg2416</i> | ankyrin repeat containing protein?                     | <i>legA1</i>     | -0.58 | -2.11 |
| <i>lpg2417</i> | ORF                                                    | -                | -2.63 | 1.39  |
| <i>lpg2420</i> | ORF                                                    | -                | 0.28  | 2.03  |
| <i>lpg2424</i> | ORF                                                    | -                | 1.65  | -2.43 |
| <i>lpg2427</i> | acetyl coenzyme A carboxylase, carboxyltransferas      | <i>mdcB</i>      | -0.61 | -3.13 |
| <i>lpg2428</i> | malonate decarboxylase gamma subunit                   | <i>mdcC</i>      | -1.04 | -4.21 |
| <i>lpg2429</i> | ORF (MdcE? malonate decarboxylase?)                    | <i>mdcG</i>      | -0.11 | -3.98 |
| <i>lpg2430</i> | 2-(5-triphosphoribosyl)-3'-dephosphocoenzyme A s       | <i>mdcB</i>      | -2.52 | -2.99 |
| <i>lpg2435</i> | ORF                                                    | -                | -0.81 | -2.41 |
| <i>lpg2436</i> | small ORF (126aa)                                      | -                | -1.58 | -2.07 |
| <i>lpg2441</i> | DNA binding protein (3-demethylubiquinone-9 3-me       | -                | -1.17 | -2.56 |
| <i>lpg2444</i> | ORF                                                    | -                | 2.11  | -3.05 |
| <i>lpg2445</i> | 161aa ORF (serpentine receptor Sre?)                   | -                | -2.35 | 0.16  |
| <i>lpg2451</i> | putative N-hydroxyarylamine O-acetyltransferase        | -                | 2.23  | 2.00  |
| <i>lpg2455</i> | ORF                                                    | -                | 2.08  | 2.37  |
| <i>lpg2458</i> | sensory box histidine kinase (two-component sensc      | -                | -0.20 | -2.11 |
| <i>lpg2460</i> | hypothetical                                           | -                | 2.45  | -0.39 |
| <i>lpg2464</i> | ORF                                                    | <i>sidM/drrA</i> | 1.67  | -2.42 |
| <i>lpg2465</i> | SidD                                                   | <i>sidD</i>      | 3.61  | -0.47 |
| <i>lpg2466</i> | hydrogenase expression/formation protein (F420-nc      | <i>vhtD</i>      | -0.72 | -2.83 |
| <i>lpg2472</i> | hydrogenase expression/formation protein HypD          | <i>hypD</i>      | -2.19 | 2.72  |
| <i>lpg2476</i> | hydrogenase nickel incorporation protein HypA          | <i>hypA</i>      | 0.80  | 2.58  |
| <i>lpg2486</i> | phosphomannomutase                                     | -                | -0.35 | 3.96  |
| <i>lpg2488</i> | phosphopantothenoylecysteine decarboxylase/phosp       | -                | 2.04  | 1.72  |
| <i>lpg2490</i> | LepB, non-muscle myosin heavy chain B (endosom         | <i>lepB</i>      | 0.57  | 2.39  |
| <i>lpg2492</i> | alcohol dehydrogenase                                  | -                | -1.48 | -3.31 |
| <i>lpg2493</i> | small heat shock protein HspC2 (molecular chaperc      | -                | 0.34  | -6.53 |
| <i>lpg2499</i> | lysine decarboxylase                                   | -                | -0.98 | -2.13 |
| <i>lpg2500</i> | carbonic anhydrase Mig5                                | -                | 0.18  | -3.59 |
| <i>lpg2508</i> | ORF                                                    | <i>sdjA</i>      | 3.11  | -1.08 |
| <i>lpg2509</i> | SdeD                                                   | <i>sdeA</i>      | 4.95  | -0.24 |
| <i>lpg2510</i> | SdcA                                                   | <i>sdcA</i>      | 1.46  | -3.13 |
| <i>lpg2511</i> | SidC, interaptin                                       | <i>sidC</i>      | 2.30  | -4.51 |
| <i>lpg2516</i> | major facilitator family transporter (sugar transport, | -                | 2.26  | 1.28  |
| <i>lpg2525</i> | ORF                                                    | -                | -2.08 | -0.92 |
| <i>lpg2526</i> | ORF                                                    | -                | 2.36  | 0.07  |

|                |                                                         |             |       |       |
|----------------|---------------------------------------------------------|-------------|-------|-------|
| <i>lpg2527</i> | contains coiled coil domain                             | -           | 0.56  | -5.07 |
| <i>lpg2528</i> | alpha-amylase, putative                                 | -           | 0.70  | -2.95 |
| <i>lpg2530</i> | 3-deoxy-D-arabino-heptulosonate 7-phosphate (DA         | <i>aroF</i> | 4.00  | 1.17  |
| <i>lpg2531</i> | chorismate mutase/prephenate dehydratase (P-pro         | -           | 5.00  | 1.29  |
| <i>lpg2532</i> | aspartate aminotransferase (PLP-dependent amino         | -           | 5.11  | 1.72  |
| <i>lpg2537</i> | 5-carboxyvanillate decarboxylase (2-amino-3-carbo       | -           | -0.09 | -2.45 |
| <i>lpg2538</i> | ORF                                                     | -           | -0.10 | 2.06  |
| <i>lpg2545</i> | small ORF (96aa)                                        | -           | -1.11 | -2.37 |
| <i>lpg2552</i> | ORF                                                     | -           | -0.11 | 2.17  |
| <i>lpg2559</i> | ATP-dependent DNA helicase                              | <i>recG</i> | -2.47 | -0.60 |
| <i>lpg2568</i> | hypothetical                                            | -           | 0.77  | -2.09 |
| <i>lpg2572</i> | ORF                                                     | -           | -2.14 | -2.96 |
| <i>lpg2576</i> | uroporphyrin-III C-methyltransferase?                   | -           | -2.33 | -1.14 |
| <i>lpg2578</i> | hypothetical? (84aa ORF)                                | -           | -1.06 | -2.41 |
| <i>lpg2582</i> | conserved hypothetical protein                          | -           | -1.22 | -2.30 |
| <i>lpg2586</i> | cysteine protease (papain C1 family)                    | -           | 2.40  | -0.29 |
| <i>lpg2587</i> | probable thermolabile hemolysin                         | -           | 1.05  | -3.14 |
| <i>lpg2589</i> | D-alanyl-D-alanine carboxypeptidase, fraction B; pe     | <i>dacB</i> | -0.07 | 2.46  |
| <i>lpg2593</i> | rRNA methyltransferase (SUN protein)                    | -           | -2.29 | 0.12  |
| <i>lpg2594</i> | methionyl tRNA formyltransferase                        | <i>fmt</i>  | -1.41 | 2.46  |
| <i>lpg2597</i> | DNA processing enzyme DprA (SMF family) (Rossm          | -           | -1.22 | -2.50 |
| <i>lpg2598</i> | small ORF (138aa)                                       | -           | 0.22  | 2.55  |
| <i>lpg2603</i> | ORF                                                     | -           | 0.98  | -4.41 |
| <i>lpg2605</i> | conserved hypothetical protein                          | -           | -1.17 | -2.27 |
| <i>lpg2606</i> | glutamine amidotransferase                              | -           | -0.26 | -2.24 |
| <i>lpg2618</i> | UDP-N-acetylmuramoylalanyl-D-glutamyl-2, 6-diam         | <i>murF</i> | 0.28  | 2.65  |
| <i>lpg2621</i> | acid phosphatase, class B (vegetative storage prote     | -           | 1.98  | 2.59  |
| <i>lpg2626</i> | ORF                                                     | -           | -0.48 | -3.03 |
| <i>lpg2631</i> | aminopeptidase A/I (leucine aminopeptidase)             | <i>pepA</i> | 0.29  | 3.41  |
| <i>lpg2633</i> | hypothetical protein                                    | -           | 1.49  | 2.38  |
| <i>lpg2637</i> | ORF                                                     | -           | 0.96  | 2.60  |
| <i>lpg2639</i> | enhanced entry protein EnhC                             | <i>enhC</i> | 0.28  | -2.67 |
| <i>lpg2640</i> | enhanced entry protein EnhB                             | <i>enhB</i> | 0.74  | -3.52 |
| <i>lpg2641</i> | enhanced entry protein EnhA                             | <i>enhA</i> | 0.67  | -3.07 |
| <i>lpg2644</i> | tail fiber protein (collagen-like protein SclB)         | <i>sclB</i> | 0.57  | 2.49  |
| <i>lpg2645</i> | excinuclease ABC subunit                                | <i>uvrC</i> | -2.12 | -0.11 |
| <i>lpg2650</i> | 50S ribosomal protein L27                               | <i>rpmA</i> | 0.32  | 3.18  |
| <i>lpg2651</i> | 50S ribosomal protein L21                               | <i>rplU</i> | 0.22  | 4.65  |
| <i>lpg2655</i> | sensory box protein (cGMP turnover?)                    | -           | -0.67 | -2.26 |
| <i>lpg2659</i> | ATPase N2B (nucleotide (GTP) binding protein), CC       | -           | 0.17  | 2.06  |
| <i>lpg2661</i> | 3-methyl-2-oxobutanoate hydroxymethyltransferase        | <i>panB</i> | -0.81 | 2.84  |
| <i>lpg2662</i> | pantoate-beta-alanine ligase (pantothenate synthet      | <i>panC</i> | -0.58 | 3.08  |
| <i>lpg2666</i> | probable hydrolase                                      | -           | 0.32  | -3.11 |
| <i>lpg2677</i> | 5'-nucleotidase                                         | -           | -2.02 | -0.87 |
| <i>lpg2693</i> | hypothetical (SmtA SAM-dependent methyltransfer         | -           | -1.45 | -2.30 |
| <i>lpg2701</i> | stringent starvation protein B COG2969                  | <i>sspB</i> | -0.24 | 2.82  |
| <i>lpg2702</i> | stringent starvation protein A (transcription activator | <i>sspA</i> | 0.77  | 3.74  |
| <i>lpg2713</i> | translational initiation factor IF-3                    | <i>infC</i> | 0.47  | 2.27  |

|                |                                                                          |               |       |       |
|----------------|--------------------------------------------------------------------------|---------------|-------|-------|
| <i>lpg2715</i> | tRNA-Val                                                                 | -             | -3.11 | -0.73 |
| <i>lpg2719</i> | conserved hypothetical protein                                           | -             | -1.00 | -3.89 |
| <i>lpg2720</i> | hypothetical protein                                                     | -             | -1.18 | -6.16 |
| <i>lpg2723</i> | transcriptional regulator (ArsR family)                                  | -             | -2.45 | -0.71 |
| <i>lpg2725</i> | inner membrane protein                                                   | -             | 3.64  | 2.84  |
| <i>lpg2726</i> | peptidylprolyl cis-trans isomerase B (cyclophilin-type)                  | <i>ppiB</i>   | -2.41 | -0.43 |
| <i>lpg2733</i> | hypothetical (transmembrane protein)                                     | -             | 0.30  | -2.41 |
| <i>lpg2735</i> | porphobilinogen deaminase (hydroxymethylbilane synthase)                 | -             | 0.46  | 2.10  |
| <i>lpg2764</i> | inorganic pyrophosphatase                                                | <i>ppa</i>    | 0.52  | 3.04  |
| <i>lpg2765</i> | HIT family hydrolase (e.g., diadenosine tetraphosphate hydrolase)        | <i>hit</i>    | 0.27  | 3.27  |
| <i>lpg2768</i> | polyribonucleotide nucleotidyltransferase (polynucleotide phosphorylase) | <i>PNP</i>    | -2.08 | 3.86  |
| <i>lpg2770</i> | tRNA pseudouridine synthase B                                            | -             | -2.14 | 0.40  |
| <i>lpg2778</i> | NADH dehydrogenase I, L subunit (NADH-ubiquinone reductase 1)            | <i>nuoL</i>   | -2.01 | 1.06  |
| <i>lpg2786</i> | NADH dehydrogenase I, D subunit (NADH-ubiquinone reductase 1)            | <i>nuoD</i>   | -0.65 | 2.45  |
| <i>lpg2792</i> | triosephosphate isomerase (TIM)                                          | <i>tpiA</i>   | 0.41  | 3.90  |
| <i>lpg2793</i> | LepA, interaptin                                                         | <i>lepA</i>   | 2.10  | -0.75 |
| <i>lpg2795</i> | 7,8-dihydropteroate synthase                                             | -             | -2.65 | -0.20 |
| <i>lpg2803</i> | ORF                                                                      | -             | -1.62 | -5.14 |
| <i>lpg2809</i> | aminopeptidase N                                                         | <i>pepN</i>   | 1.08  | 2.22  |
| <i>lpg2815</i> | ORF                                                                      | -             | 0.66  | 2.67  |
| <i>lpg2818</i> | conserved hypothetical protein                                           | -             | -0.38 | -2.78 |
| <i>lpg2820</i> | aldo/keto reductase (oxidoreductase)                                     | -             | -0.10 | -2.08 |
| <i>lpg2822</i> | virulence regulator BipA (GTP binding protein type 1)                    | <i>bipA</i>   | 0.56  | 2.02  |
| <i>lpg2823</i> | sugar kinase (inorganic polyphosphate/ATP-NAD kinase)                    | -             | -0.30 | 2.53  |
| <i>lpg2829</i> | SidH (myosin-like protein)                                               | <i>sidH</i>   | -3.07 | -5.16 |
| <i>lpg2832</i> | hypothetical                                                             | -             | -3.56 | -0.77 |
| <i>lpg2837</i> | lysophospholipase A (GDSL-motif lipase/hydrolase family)                 | -             | -1.13 | -3.49 |
| <i>lpg2839</i> | SsrA (tmRNA) binding protein (small protein B), protein                  | <i>smpB</i>   | -0.92 | 2.69  |
| <i>lpg2840</i> | AhpC/TSA family protein (bacterioferritin comigrator)                    | -             | 0.19  | 2.03  |
| <i>lpg2844</i> | proteophosphoglycan, membrane associated (mucin)                         | -             | 0.20  | -2.30 |
| <i>lpg2849</i> | hypothetical (bacteriophage glycoprotein?)                               | -             | -0.76 | -2.45 |
| <i>lpg2852</i> | amidase (6-aminohexanoate-cyclic dimer hydrolase)                        | <i>amic</i>   | -1.33 | -2.48 |
| <i>lpg2855</i> | TPR (repeat) domain protein, protein-protein interaction                 | -             | -2.04 | 0.26  |
| <i>lpg2862</i> | ORF                                                                      | <i>legC8</i>  | 1.14  | -5.63 |
| <i>lpg2864</i> | conserved hypothetical protein                                           | -             | -0.27 | 2.64  |
| <i>lpg2876</i> | arsenite efflux protein (arsenite permease, arsenite transporter)        | -             | 0.03  | 2.47  |
| <i>lpg2882</i> | methionyl tRNA synthetase                                                | <i>metG_1</i> | -0.89 | 2.72  |
| <i>lpg2888</i> | ORF                                                                      | -             | 1.08  | -2.51 |
| <i>lpg2900</i> | CapM protein, capsular polysaccharide biosynthesis                       | <i>capM2</i>  | -0.24 | 2.82  |
| <i>lpg2907</i> | ORF                                                                      | -             | 1.53  | -2.06 |
| <i>lpg2918</i> | lytic murein transglycosylase (membrane bound)                           | -             | 0.97  | -2.10 |
| <i>lpg2919</i> | (serine-type) D-alanyl-D-alanine carboxypeptidase (serine-type)          | -             | -0.77 | -3.76 |
| <i>lpg2929</i> | aspartate-1-decarboxylase (L-aspartate-alpha-decarboxylase)              | <i>panD</i>   | 1.63  | 2.50  |
| <i>lpg2930</i> | sec-independent (periplasmic) protein translocase (SecYEG)               | <i>tatC</i>   | -2.15 | -0.53 |
| <i>lpg2931</i> | conserved hypothetical protein, COG3785                                  | -             | 0.05  | -2.87 |
| <i>lpg2934</i> | transcription termination factor rho                                     | -             | -0.07 | 2.09  |
| <i>lpg2943</i> | UDP-N-acetylglucosamine acyltransferase, acyl-[acyl carrier protein]     | -             | 0.21  | 3.43  |
| <i>lpg2949</i> | asparagine synthetase (B) (glutamine hydrolyzing)                        | <i>wbml</i>   | 0.37  | 2.95  |

|                |                                                                |             |       |       |
|----------------|----------------------------------------------------------------|-------------|-------|-------|
| <i>lpg2950</i> | hypothetical protein                                           | -           | -2.53 | -0.23 |
| <i>lpg2953</i> | ORF                                                            | -           | -0.86 | -2.73 |
| <i>lpg2956</i> | deoxycytidine triphosphate deaminase                           | <i>dcd</i>  | 0.12  | 2.81  |
| <i>lpg2957</i> | stomatin like transmembrane protein                            | -           | 0.41  | -3.21 |
| <i>lpg2958</i> | transmembrane protein (nodulation competitiveness)             | -           | -0.37 | -2.58 |
| <i>lpg2959</i> | conserved hypothetical protein                                 | -           | 1.36  | 2.67  |
| <i>lpg2962</i> | sodium-type flagellar protein (lateral flagellar MotY-l)       | -           | 1.12  | -3.64 |
| <i>lpg2967</i> | superoxide dismutase                                           | <i>sodB</i> | 1.62  | 2.55  |
| <i>lpg2968</i> | N-acetylornithine aminotransferase ArgD                        | <i>argD</i> | 1.08  | 3.02  |
| <i>lpg2981</i> | ATP synthase epsilon chain, ATP synthase F1 epsilon            | <i>atpC</i> | -1.28 | 2.10  |
| <i>lpg2982</i> | H <sup>+</sup> -transporting two-sector ATPase, ATP synthase f | <i>atpD</i> | -1.26 | 3.58  |
| <i>lpg2983</i> | ATP synthase gamma chain, ATP synthase F1 gamma                | <i>atpG</i> | -1.59 | 4.03  |
| <i>lpg2984</i> | F0F1-ATPase subunit alpha, ATP synthase alpha cl               | -           | -1.02 | 3.17  |
| <i>lpg2985</i> | ATP synthase F1, delta subunit (F0F1 ATPase subunit)           | <i>atpH</i> | -2.15 | 2.39  |
| <i>lpg2986</i> | ATP synthase F0, B subunit                                     | <i>atpF</i> | -0.77 | 2.80  |
| <i>lpg2987</i> | ATP synthase F0, C subunit                                     | <i>atpE</i> | -0.10 | 2.23  |
| <i>lpg2989</i> | ATP synthase protein I (ATP synthase F0, I subunit)            | <i>atpI</i> | -0.64 | 3.24  |
| <i>lpg2990</i> | ORF                                                            | -           | -2.76 | 1.58  |
| <i>lpg2995</i> | lipoprotein (exported protein)                                 | -           | 0.65  | 2.65  |
| <i>lpg3000</i> | ORF                                                            | -           | 2.83  | 1.73  |
| <i>lpg3003</i> | conserved hypothetical protein TIGR00278, COG07                | -           | -2.73 | 2.50  |
| <i>lpg3004</i> | ribonuclease P protein component                               | <i>rnpA</i> | -3.30 | 3.03  |

\* Log2 Ratio
