# Supplementary material
Source: PubMed Central journal article supplement (PMC2668410)
Supplement: supp_191_8_2461__3.pdf [file supp_191_8_2461__3.pdf]

**Table S3. *L. pneumophila* secretion systems**

| ORF            | Gene          | Secretion | * <i>rpoS</i> | * <i>rpoS</i> |
|----------------|---------------|-----------|---------------|---------------|
|                |               | System    | E/Wt E        | PE/Wt PE      |
| <i>lpg1511</i> | <i>lssX</i>   | Type I    | -1.68         | 0.91          |
| <i>lpg1512</i> | <i>lssY</i>   | Type I    | -2.55         | -0.63         |
| <i>lpg1513</i> | <i>lssZ</i>   | Type I    | -0.69         | -1.68         |
| <i>lpg1514</i> | <i>lssA</i>   | Type I    | 0.11          | -0.3          |
| <i>lpg1516</i> | <i>lssB</i>   | Type I    | -2.72         | -2.82         |
| <i>lpg1517</i> | <i>lssD</i>   | Type I    | -2.38         | -2.73         |
| <i>lpg1358</i> | <i>lspK</i>   | Type II   | -0.77         | 0             |
| <i>lpg1359</i> | <i>lspJ</i>   | Type II   | -0.28         | -2.03         |
| <i>lpg1360</i> | <i>lspI</i>   | Type II   | -0.37         | -0.06         |
| <i>lpg1361</i> | <i>lspH</i>   | Type II   | 0.19          | 0.32          |
| <i>lpg1362</i> | <i>lspG</i>   | Type II   | 0.99          | 0.48          |
| <i>lpg1363</i> | <i>lspF</i>   | Type II   | -0.52         | 1.94          |
| <i>lpg1524</i> | <i>pilD</i>   | Type II   | -1.63         | -2.27         |
| <i>lpg1245</i> | <i>lvhD4</i>  | Type IV A | 0.77          | -0.24         |
| <i>lpg1246</i> | <i>lvhB11</i> | Type IV A | 1.4           | 0.6           |
| <i>lpg1247</i> | <i>lvhB10</i> | Type IV A | 0.34          | -1.36         |
| <i>lpg1248</i> | <i>lvhB9</i>  | Type IV A | -1.55         | -2.26         |
| <i>lpg1249</i> | <i>lvhB8</i>  | Type IV A | 2.21          | -1.18         |
| <i>lpg1250</i> | <i>lvhB6</i>  | Type IV A | -0.12         | -2.78         |
| <i>lpg1251</i> | <i>lvrD</i>   | Type IV A | 0.56          | -0.56         |
| <i>lpg1252</i> | <i>lvhB7</i>  | Type IV A | 0.55          | -0.12         |
| <i>lpg1253</i> | <i>lvhB5</i>  | Type IV A | -0.46         | 1.76          |
| <i>lpg1254</i> | <i>lvhB4</i>  | Type IV A | 0.69          | -0.9          |
| <i>lpg1255</i> | <i>lvhB3</i>  | Type IV A | -0.4          | -2.34         |
| <i>lpg1256</i> | <i>lvhB2</i>  | Type IV A | 1.9           | 0.27          |
| <i>lpg0441</i> | <i>icmT</i>   | Type IV B | 0.36          | -0.91         |
| <i>lpg0442</i> | <i>icmS</i>   | Type IV B | -0.42         | -1.36         |
| <i>lpg0443</i> | <i>icmR</i>   | Type IV B | 0.07          | -1.34         |
| <i>lpg0444</i> | <i>icmQ</i>   | Type IV B | -1.76         | -0.73         |
| <i>lpg0445</i> | <i>icmP</i>   | Type IV B | -0.86         | -1.25         |
| <i>lpg0446</i> | <i>icmO</i>   | Type IV B | -1.2          | -1.24         |
| <i>lpg0447</i> | <i>lphA</i>   | Type IV B | -1.02         | 0.08          |
| <i>lpg0448</i> | <i>icmM</i>   | Type IV B | -1.04         | 0.13          |
| <i>lpg0449</i> | <i>icmL</i>   | Type IV B | -0.58         | 0.47          |
| <i>lpg0450</i> | <i>icmK</i>   | Type IV B | -0.54         | 0.26          |
| <i>lpg0451</i> | <i>icmE</i>   | Type IV B | -0.13         | 0.78          |
| <i>lpg0452</i> | <i>icmG</i>   | Type IV B | -0.53         | 0.91          |
| <i>lpg0453</i> | <i>icmC</i>   | Type IV B | -1.58         | -1.04         |
| <i>lpg0454</i> | <i>icmD</i>   | Type IV B | -0.85         | -1.06         |
| <i>lpg0455</i> | <i>icmJ</i>   | Type IV B | -1.24         | -1.28         |
| <i>lpg0456</i> | <i>icmB</i>   | Type IV B | -1.18         | -1.12         |
| <i>lpg0457</i> | <i>tphA</i>   | Type IV B | -0.57         | -0.76         |
| <i>lpg2674</i> | <i>dotD</i>   | Type IV B | -0.54         | 1.24          |
| <i>lpg2675</i> | <i>dotC</i>   | Type IV B | -1.4          | 0.75          |
| <i>lpg2676</i> | <i>dotB</i>   | Type IV B | -1.11         | 0.55          |
| <i>lpg2686</i> | <i>dotA</i>   | Type IV B | -0.31         | -1.33         |
| <i>lpg2687</i> | <i>icmV</i>   | Type IV B | 0.45          | -0.65         |
| <i>lpg2688</i> | <i>icmW</i>   | Type IV B | 0.38          | -0.15         |
| <i>lpg2689</i> | <i>icmX</i>   | Type IV B | 0.07          | -0.2          |
| <i>lpg0458</i> | <i>icmF</i>   | Type VI   | 0.19          | 1.22          |
| <i>lpg0459</i> | <i>icmH</i>   | Type VI   | -0.15         | 2.57          |

\*log<sub>2</sub> Ratio
