# Supplementary material
Source: PubMed Central journal article supplement (PMC2668410)
Supplement: supp_191_8_2461__4.pdf [file supp_191_8_2461__4.pdf]

**Table S4. Icm/Dot translocated substrates**

| <b>ORF</b>     | <b>Domain</b>                    | <b>Product</b> | <b>Citation</b>        | <b>Ratio* <i>rpoS</i><br/>E/ Wt E</b> | <b>Ratio* <i>rpoS</i><br/>PE/ Wt PE</b> |
|----------------|----------------------------------|----------------|------------------------|---------------------------------------|-----------------------------------------|
| <i>lpg0012</i> | -                                | CegC1          | Altman & Segal 2008    | 0.12                                  | -1.44                                   |
| <i>lpg0038</i> | ankyrin repeat                   | LegA10         | de Felipe et al. 2005  | 1.04                                  | -1.52                                   |
| <i>lpg0045</i> | -                                | -              | Kobori & Nagai 2008    | 0.03                                  | -0.51                                   |
| <i>lpg0081</i> | -                                | -              | Kobori & Nagai 2008    | 1.72                                  | -1.58                                   |
| <i>lpg0103</i> | acetyltransferase                | VipF           | Shody et al. 2005      | -1.26                                 | -0.15                                   |
| <i>lpg0126</i> | -                                | CegC2          | Altman & Segal 2008    | 2.33                                  | 1.50                                    |
| <i>lpg0171</i> | F-box                            | LegU1          | de Felipe et al. 2005  | 0.86                                  | 1.94                                    |
| <i>lpg0227</i> | -                                | Ceg7           | Altman & Segal 2008    | 3.15                                  | -0.14                                   |
| <i>lpg0234</i> | -                                | SidE           | Luo & Isberg 2004      | 0.61                                  | 0.81                                    |
| <i>lpg0275</i> | Rtx toxin/lipase                 | SdbA           | Luo & Isberg 2004      | 1.53                                  | -0.04                                   |
| <i>lpg0276</i> | Ras GEF                          | LegG2          | de Felipe et al. 2005  | 0.29                                  | -1.75                                   |
| <i>lpg0284</i> | -                                | Ceg10          | Zusman et al. 2007     | 0.31                                  | -0.44                                   |
| <i>lpg0294</i> | -                                | -              | Kobori & Nagai 2008    | 0.07                                  | -0.76                                   |
| <i>lpg0365</i> | -                                | -              | Kobori & Nagai 2008    | 1.81                                  | -0.89                                   |
| <i>lpg0376</i> | GRIP, coiled-coil                | SdhA           | Laguna et al. 2006     | -2.15                                 | 0.73                                    |
| <i>lpg0390</i> | -                                | VipA           | Shody et al. 2005      | 0.68                                  | 0.13                                    |
| <i>lpg0436</i> | ankyrin repeat                   | LegA11         | de Felipe et al. 2005  | 2.14                                  | -1.76                                   |
| <i>lpg0483</i> | ankyrin repeat                   | LegA12         | de Felipe et al. 2005  | 2.54                                  | 0.16                                    |
| <i>lpg0518</i> | -                                | -              | Kobori & Nagai 2008    | 2.06                                  | 0.95                                    |
| <i>lpg0621</i> | -                                | SidA           | Luo & Isberg 2004      | 2.44                                  | 0.58                                    |
| <i>lpg0634</i> | -                                | -              | Kobori & Nagai 2008    | 0.84                                  | -0.86                                   |
| <i>lpg0642</i> | -                                | WipB           | Ninio et al 2005       | -0.81                                 | -2.01                                   |
| <i>lpg0695</i> | ankyrin repeat                   | LegA8          | de Felipe et al. 2005  | -0.93                                 | -2.06                                   |
| <i>lpg0898</i> | -                                | Ceg18          | Altman & Segal 2008    | -0.20                                 | -0.40                                   |
| <i>lpg0940</i> | coiled-coil                      | LidA           | Conover et al. 2003    | 0.99                                  | -2.13                                   |
| <i>lpg0945</i> | leucine-rich repeat              | LegL1          | de Felipe et al. 2005  | 0.12                                  | -0.16                                   |
| <i>lpg0963</i> | -                                | -              | Kobori & Nagai 2008    | 2.31                                  | -1.40                                   |
| <i>lpg1144</i> | -                                | CegC3          | Altman & Segal 2008    | 2.07                                  | 0.11                                    |
| <i>lpg1148</i> | -                                | -              | Kobori & Nagai 2008    | 1.15                                  | -2.31                                   |
| <i>lpg1158</i> | -                                | -              | Kobori & Nagai 2008    | -0.59                                 | -3.30                                   |
| <i>lpg1227</i> | patatin-like phospholipase       | VpdB           | VanRheenen et al. 2006 | 0.54                                  | -2.05                                   |
| <i>lpg1273</i> | -                                | -              | Kobori & Nagai 2008    | -0.40                                 | 0.31                                    |
| <i>lpg1355</i> | -                                | SidG           | Luo & Isberg 2004      | -1.70                                 | -5.52                                   |
| <i>lpg1426</i> | -                                | VpdC           | VanRheenen et al. 2006 | -2.62                                 | -1.07                                   |
| <i>lpg1488</i> | coiled-coil                      | LegC5          | de Felipe et al. 2005  | 1.10                                  | 1.86                                    |
| <i>lpg1588</i> | coiled-coil                      | LegC6          | de Felipe et al. 2005  | 0.73                                  | -1.95                                   |
| <i>lpg1602</i> | leucine-rich repeat              | LegL2          | de Felipe et al. 2005  | -0.58                                 | 0.84                                    |
| <i>lpg1621</i> | -                                | Ceg23          | Zusman et al. 2007     | -2.18                                 | -2.41                                   |
| <i>lpg1642</i> | Rtx toxin/lipase                 | SidB           | Luo & Isberg 2004      | -1.07                                 | -0.12                                   |
| <i>lpg1660</i> | leucine-rich repeat              | LegL3          | de Felipe et al. 2005  | -0.84                                 | -2.34                                   |
| <i>lpg1689</i> | -                                | -              | Kobori & Nagai 2008    | -0.54                                 | -1.40                                   |
| <i>lpg1701</i> | coiled-coil                      | LegC3          | de Felipe et al. 2005  | -0.12                                 | -0.75                                   |
| <i>lpg1717</i> | -                                | -              | Kobori & Nagai 2008    | 1.07                                  | -0.24                                   |
| <i>lpg1718</i> | -                                | LegAS4         | de Felipe et al. 2005  | 2.16                                  | -0.96                                   |
| <i>lpg1751</i> | -                                | -              | Kobori & Nagai 2008    | 3.05                                  | 1.54                                    |
| <i>lpg1884</i> | coiled-coil                      | LegC2/YlfB     | de Felipe et al. 2005  | -1.57                                 | -2.20                                   |
| <i>lpg1890</i> | leucine-rich repeat, coiled-coil | LegLC8         | de Felipe et al. 2005  | 3.45                                  | 0.45                                    |
| <i>lpg1948</i> | leucine-rich repeat, coiled-coil | LegLC4         | de Felipe et al. 2005  | 3.29                                  | -0.56                                   |
| <i>lpg1950</i> | sec7 homology, ARF1 GEF          | RalF           | Nagai et al. 2002      | -0.29                                 | -2.96                                   |
| <i>lpg1953</i> | coiled-coil                      | LegC4          | de Felipe et al. 2005  | 0.66                                  | 0.26                                    |
| <i>lpg1958</i> | leucine-rich repeat              | LegL5          | de Felipe et al. 2005  | 0.28                                  | -0.73                                   |

|                |                                 |            |                        |       |       |
|----------------|---------------------------------|------------|------------------------|-------|-------|
| <i>lpg1976</i> | -                               | LegG1      | de Felipe et al. 2005  | 3.77  | 0.43  |
| <i>lpg2137</i> | serine/threonine protein kinase | LegK2      | de Felipe et al. 2005  | -0.39 | -1.74 |
| <i>lpg2144</i> | F-box, ankyrin repeat           | LegAU13    | de Felipe et al. 2005  | 0.53  | -3.11 |
| <i>lpg2153</i> | -                               | SdeC       | Luo & Isberg 2004      | 0.76  | -2.90 |
| <i>lpg2155</i> | -                               | SidJ       | Liu & Luo 2007         | -0.80 | -2.84 |
| <i>lpg2157</i> | -                               | SdeA       | Luo & Isberg 2004      | 0.17  | -3.27 |
| <i>lpg2176</i> | sphingosine 1-phosphate lyase   | LegS2      | de Felipe et al. 2005  | -1.18 | 3.77  |
| <i>lpg2200</i> | -                               | CegC4      | Altman & Segal 2008    | 1.78  | -1.55 |
| <i>lpg2215</i> | ankyrin repeat                  | LegA2      | de Felipe et al. 2005  | -0.64 | -0.50 |
| <i>lpg2298</i> | coiled-coil                     | LegC7/YIfA | de Felipe et al. 2005  | -0.50 | 3.00  |
| <i>lpg2300</i> | ankyrin repeat                  | LegA3      | de Felipe et al. 2005  | 0.57  | -1.21 |
| <i>lpg2322</i> | ankyrin repeat                  | LegA5      | de Felipe et al. 2005  | 1.66  | -0.65 |
| <i>lpg2327</i> | -                               | -          | Kobori & Nagai 2008    | 1.53  | -4.36 |
| <i>lpg2391</i> | Rtx toxin/lipase                | SdbC       | Luo & Isberg 2004      | 1.57  | -0.78 |
| <i>lpg2400</i> | leucine-rich repeat             | LegL7      | de Felipe et al. 2005  | 0.29  | -0.59 |
| <i>lpg2407</i> | -                               | -          | Kobori & Nagai 2008    | 0.54  | -1.31 |
| <i>lpg2409</i> | -                               | Ceg29      | Zusman et al. 2007     | 2.58  | 1.20  |
| <i>lpg2410</i> | patatin-like phospholipase      | VpdA       | VanRheenen et al. 2006 | 1.76  | -2.33 |
| <i>lpg2452</i> | ankyrin repeat                  | LegA14     | de Felipe et al. 2005  | -0.35 | 0.60  |
| <i>lpg2456</i> | ankyrin repeat                  | LegA15     | de Felipe et al. 2005  | 0.15  | -1.28 |
|                |                                 |            | Machner & Isberg 2006  |       |       |
| <i>lpg2464</i> | -                               | SidM/DrrA  | Murata et al. 2006     | 1.67  | -2.42 |
| <i>lpg2465</i> | -                               | SidD       | Luo & Isberg 2004      | 3.61  | -0.47 |
| <i>lpg2482</i> | Rtx toxin/lipase                | SdbC       | Luo & Isberg 2004      | 2.63  | 1.50  |
| <i>lpg2490</i> | coiled-coil                     | LepB       | Chen et al. 2004       | 0.57  | 2.39  |
| <i>lpg2508</i> | -                               | SdjA       | Liu & Luo 2007         | 3.11  | -1.08 |
| <i>lpg2511</i> | PI(4)P binding                  | SidC       | Luo & Isberg 2004      | 2.30  | -4.51 |
| <i>lpg2527</i> | coiled-coil                     | -          | Kobori & Nagai 2008    | 0.56  | -5.07 |
| <i>lpg2556</i> | serine/threonine protein kinase | LegK3      | de Felipe et al. 2005  | -0.64 | 0.32  |
| <i>lpg2584</i> | Bcl2-rambo/BNIP3 binding        | SidF       | Luo & Isberg 2004      | -0.63 | -1.49 |
| <i>lpg2591</i> | small ORF (165aa)               | Ceg33      | Altman & Segal 2008    | -0.53 | -1.35 |
| <i>lpg2718</i> | -                               | WipA       | Ninio et al 2005       | -1.60 | 0.28  |
| <i>lpg2744</i> | -                               | -          | Kobori & Nagai 2008    | 1.95  | 0.11  |
| <i>lpg2793</i> | coiled-coil                     | LepA       | Chen et al. 2004       | 2.10  | -0.75 |
| <i>lpg2829</i> | -                               | SidH       | Luo & Isberg 2004      | -3.07 | -5.16 |
| <i>lpg2830</i> | U-box                           | LegU2      | de Felipe et al. 2005  | 0.91  | -0.53 |
| <i>lpg2831</i> | patatin-like phospholipase      | VipD       | Shody et al. 2005      | 0.51  | -2.39 |
| <i>lpg2862</i> | coiled-coil                     | LegC8      | de Felipe et al. 2005  | 1.14  | -5.63 |
| <i>lpg2999</i> | astacin protease                | LegP       | de Felipe et al. 2005  | 0.93  | 1.20  |

\* log<sub>2</sub>
