# Supplementary material
Source: PubMed Central journal article supplement (PMC2668410)
Supplement: supp_191_8_2461__5.pdf [file supp_191_8_2461__5.pdf]

**Table S5. Comparison of real-time qPCR to microarray results**

| ORF            | Gene         | Category                  | Microarray Ratio*<br>( <i>rpoS</i> E/ Wt E) | qPCR Ratio*<br>( <i>rpoS</i> E/Wt E) | Microarray Ratio*<br>( <i>rpoS</i> PE/Wt PE) | qPCR Ratio*<br>( <i>rpoS</i> PE/Wt PE) |
|----------------|--------------|---------------------------|---------------------------------------------|--------------------------------------|----------------------------------------------|----------------------------------------|
| <i>lpg0490</i> | <i>argR</i>  | Transcription Regulator   | 3.80                                        | 1.29                                 | -1.08                                        | -2.31                                  |
| <i>lpg1135</i> |              | Transcription Regulator   | 0.90                                        | -0.50                                | -3.30                                        | -3.40                                  |
| <i>lpg1292</i> | <i>pmrA</i>  | Two-component DNA-Binding | -0.94                                       | 0.81                                 | -2.14                                        | -3.93                                  |
| <i>lpg1340</i> | <i>fliC</i>  | Motility                  | 2.00                                        | 0.70                                 | -2.00                                        | -5.50                                  |
| <i>lpg1355</i> | <i>sidG</i>  | Icm/Dot Translocated      | -1.70                                       | 0.79                                 | -5.52                                        | -7.95                                  |
| <i>lpg1438</i> | <i>cpxR</i>  | Two-component DNA-Binding | -2.43                                       | ND                                   | -2.57                                        | -1.24                                  |
| <i>lpg1950</i> | <i>ralF</i>  | Icm/Dot Translocated      | -0.29                                       | -1.04                                | -2.96                                        | -6.60                                  |
| <i>lpg2157</i> | <i>sdeA</i>  | Icm/Dot Translocated      | 0.17                                        | 0.55                                 | -3.27                                        | -6.20                                  |
| <i>lpg2181</i> |              | Two-component receiver    | 1.00                                        | -0.30                                | -5.60                                        | -5.90                                  |
| <i>lpg2409</i> | <i>ceg29</i> | Icm/Dot Translocated      | 2.99                                        | 2.57                                 | 1.38                                         | 4.46                                   |
| <i>lpg2720</i> | <i>legN</i>  | Icm/Dot Translocated      | 0.77                                        | 0.85                                 | -6.16                                        | -6.03                                  |
| <i>lpg2793</i> | <i>lepA</i>  | Icm/Dot Translocated      | 2.10                                        | 2.27                                 | -0.75                                        | ND                                     |
| <i>lpg2829</i> | <i>sidH</i>  | Icm/Dot Translocated      | -3.07                                       | ND                                   | -5.16                                        | -5.11                                  |

\* log<sub>2</sub> Ratio
