# Supplementary material
Source: PubMed Central journal article supplement (PMC2668410)
Supplement: supp_191_8_2461__6.pdf [file supp_191_8_2461__6.pdf]

Table S6. LFH-PCR Primers

| Strain | ORF            | Gene        | Primer 1 (5'->3')            | Primer 2 (5'->3')                                                   | Primer 3 (5'->3')                                                     | Primer 4 (5'->3')           |
|--------|----------------|-------------|------------------------------|---------------------------------------------------------------------|-----------------------------------------------------------------------|-----------------------------|
| GAH280 | <i>lpg0490</i> | <i>argR</i> | GTGCCTCTCAATATGGATATGAATCGG  | CCCGGCCAAGCTAAAAACACGGATCCTTGCTTTCT<br>CCCTGTATCAATTAATTTG          | GATGCTCGATGAGTTTTTCTAAGGATCCCAGGGCTTA<br>TGAAAAACCCCAAGCTCG           | CAAAGATCCATATGGCTGTGGATGCC  |
| GAH041 | <i>lpg0586</i> |             | AACAACAGGAGTGTCTATGATTAAGC   | CCCGGCCAAGCTAAAAACACGGATCCAAGAAGTCC<br>CCCCAAAATTATCTCCGCTC         | GATGCTCGATGAGTTTTTCTAAGGATCCAGGTGTGTA<br>TTTAGGTTTTGATTCGGG           | AGAAATCAAAACCACTCACCAACC    |
| GAH049 | <i>lpg1260</i> |             | CCTTAAACTGACTTCTCCAAACATGGC  | CCCGGCCAAGCTAAAAACACGGATCCTGTGTGTTA<br>ACTTTAAACTTTAATTACTCGTTTCG   | GATGCTCGATGAGTTTTTCTAAGGATCCATCCTTAGT<br>CCAAAAACATTTAGGGC            | CACATGAGCTTGAACACCATTGGC    |
| GAH235 | <i>lpg1284</i> | <i>rpoS</i> | CCTTTGAATCAATAAGAGGATTGC     | CCCGGCCAAGCTAAAAACACGGATCCGCCTATTGT<br>TGCTATACTATGAGTTATATGTCAACC  | GATGCTCGATGAGTTTTTCTAAGGATCCTTTAACCAG<br>TTAATTAATTACACACAAGTTGGG     | AGGACTATTCATATTGCCGGTAGC    |
| GAH337 | <i>lpg1446</i> |             | GACTGTAAGAGACCAGTATTGGTGC    | CCCGGCCAAGCTAAAAACACGGATCCCGGGCTCAT<br>TACTGGATAATACCAAGCTTCAAC     | GATGCTCGATGAGTTTTTCTAAGGATCCCAGGCAA<br>CCCAACCTATAAAGAGGTGACGC        | GCTCAGTCCATTTTTGGTCTGTGG    |
| GAH052 | <i>lpg1577</i> | <i>rpoE</i> | AAGAATTCTCCCTTTAAGGTTACATTGG | CCCGGCCAAGCTAAAAACACGGATCCAGCTTCCTC<br>ATTATTCCTTTGCTTGTATTACGTTAGG | GATGCTCGATGAGTTTTTCTAAGGATCCTATCATTTTG<br>ATATCATATAAAATCATCAACC      | AATACTATCTATGCCTACTGGACCACC |
| GAH014 | <i>lpg1796</i> |             | CTCACGCCAAAAAGCAATAAGCG      | CCCGGCCAAGCTAAAAACACGGATCCGCCTATAATA<br>GGCGTTATAACGCATAAAAGC       | GCAGTTTCATTTGATGCTCGATGAGTTTTTCTAAGGA<br>TCCGGGTTAACACGTCAAGTAATTAAGC | GACATGATATGCTCTTGGTTAATGC   |
| GAH338 | <i>lpg1912</i> | <i>letS</i> | CGCTCATGCAATACCATTAAAGGCTCC  | CCCGGCCAAGCTAAAAACACGGATCCGCAAAAAGC<br>AAGGGCACTAAAAAGGCAGG         | GATGCTCGATGAGTTTTTCTAAGGATCCACGAACCG<br>CTAATGCTGATAATTAACCGAAGCC     | GCATGTCCGAATGCATCACGTAATCC  |
| GAH056 | <i>lpg2138</i> |             | CTATGGCAATTGAAATATCCTGTGC    | CCCGGCCAAGCTAAAAACACGGATCCCAAATTA<br>CTTTTTATATCCTATCCAGGG          | GATGCTCGATGAGTTTTTCTAAGGATCCTATCATAAA<br>CGATTATCAATCATAAACCGCTGC     | AAATACCTTTCATGAGCTACCTCCC   |
| GAH060 | <i>lpg2376</i> |             | ATTTTAGTGGTTTTAGATTCTGGCTAGC | CCCGGCCAAGCTAAAAACACGGATCCAAAACATCA<br>TCCGTATATAGGACCCTAATAGG      | GATGCTCGATGAGTTTTTCTAAGGATCCTCAGTTAAA<br>ACCCACTCTACGAACTAGCTATAG     | TTCATCTTATTTCTCAATAGTCACTGC |
| GAH074 | <i>lpg2723</i> |             | TTCCACTGATTACTGCAACACTTGG    | CCCGGCCAAGCTAAAAACACGGATCCGCGATATGT<br>CAATTTAGTGATTACCCATGG        | GATGCTCGATGAGTTTTTCTAAGGATCCGCTTGAATA<br>AATCGAATATTTGCGATATCC        | TAAATCGGGATTAGCAATAAATGGC   |
