# Supplementary material
Source: PubMed Central journal article supplement (PMC2668410)
Supplement: supp_191_8_2461__7.pdf [file supp_191_8_2461__7.pdf]

**Table S7. Primers used in this study**

| <b>Primer Name</b>     | <b>Purpose</b> | <b>Restriction Sites</b> | <b>Sequence</b>                          |
|------------------------|----------------|--------------------------|------------------------------------------|
| <b>lpg0490qF</b>       | argR qPCR      | None                     | TGCATTACCAGGATGAGTTTGC                   |
| <b>lpg0490qR</b>       | argR qPCR      | None                     | TGGCTTACCTCTGGTTCTAAATGTC                |
| <b>pmrAqF</b>          | pmrA qPCR      | None                     | GTGGATGATGTACTIONCGTCAATGTTT             |
| <b>pmrAqR</b>          | pmrA qPCR      | None                     | TGGCCACTGTTTTCAAGTAATTTT                 |
| <b>lpg1135qF</b>       | lpg1134 qPCR   | None                     | GACCAAAATTTGATTTACTCACTGCC               |
| <b>lpg1135qR</b>       | lpg1134 qPCR   | None                     | GGCTCTAATTTATGAAATATCATTGTC              |
| <b>sidGqF</b>          | sidG qPCR      | None                     | CCATTACTCGGTCGATCATTAGTTC                |
| <b>sidGqR</b>          | sidG qPCR      | None                     | TGTCCCGTTTCAAAGATGAAG                    |
| <b>fliC RT Fw</b>      | fliC qPCR      | None                     | ACAACCAATATTTTACAACGCATGC                |
| <b>fliC RT Rv</b>      | fliC qPCR      | None                     | TTCAGTATTTTGGAGCAATACGCTCC               |
| <b>ralF</b>            | ralF qPCR      | None                     | AATTGACCGGTTAGTGCAAAGC                   |
| <b>ralF</b>            | ralF qPCR      | None                     | CCGCATTGGAAACCACATC                      |
| <b>sdeAqF</b>          | sdeA qPCR      | None                     | TGCTCATCAATGGCCAGAAAC                    |
| <b>sdeAqR</b>          | sdeA qPCR      | None                     | ACAGCCATCTCGCATTTTCG                     |
| <b>ceg29qF</b>         | ceg29 qPCR     | None                     | CTTGGTGCCTGGAATGATTTATG                  |
| <b>ceg29qR</b>         | ceg29 qPCR     | None                     | CGGTTTGCTGATGGATTAAGG                    |
| <b>legNqF</b>          | legN qPCR      | None                     | GGTTGCTAAGGACAATGTGACATG                 |
| <b>legNqR</b>          | legN qPCR      | None                     | TGGCCTCAGGTGAAAATGC                      |
| <b>lepAqF</b>          | lepA qPCR      | None                     | GAAAAGGATTCCGTGGCTACTG                   |
| <b>lepAqR</b>          | lepA qPCR      | None                     | TCAAGGACGATTGGTGTTC                      |
| <b>sidHqF</b>          | sidH qPCR      | None                     | TCTTGTATGTCCGAATTACTGTGATTG              |
| <b>sidHqR</b>          | sidH qPCR      | None                     | CGTGATAGGTACTGCCATGATC                   |
| <b>16SqF</b>           | 16S qPCR       | None                     | AGAATCACAGCTTGCAGCTTTG                   |
| <b>16SqR</b>           | 16S qPCR       | None                     | CACTCATGCCAATCAGTTGATACC                 |
| <b>OKS210</b>          | KmR Cassette   | XbaI                     | GCGCGGATCCTTAGAAAACTCATCGAGCATCAAATGAAAC |
| <b>OKS246</b>          | KmR Cassette   | XbaI                     | GCGCGGATCCGTGTTTTTTAGCTTGGCCGGGTTACATTG  |
| <b>ptac-gfp-5</b>      | GFP Cassette   | None                     | CGCCGACATCATAACGGTTCTGGCAA               |
| <b>ptac-gfp-3</b>      | GFP Cassette   | None                     | CGCCGACATCATAACGGTTCTGGCAA               |
| <b>SacII GentR Fw</b>  | GentR Cassette | SacII                    | ATCCGCGGATGCATCAGCACCTTGTGCGCCTTGC       |
| <b>GentR Rv SacII</b>  | GentR Cassette | SacII                    | ATCCGCGGATGGAAGCCGATCTCGGCTTGAACG        |
| <b>KpnI lpg0490 Fw</b> | argR Cloning   | KpnI                     | ATAGGTACCGGGTATGAGATTCCTCAAGCAACCC       |
| <b>lpg0490 XbaI Rv</b> | argR Cloning   | XbaI                     | ATATCTAGAATCTTCGAGCTTGGGTTTTTTCATAAGCCC  |
| <b>KpnI-letS-Fw</b>    | letS Cloning   | KpnI                     | ATTGGTACCAGCCGAGTTTACCATGAACGCAAAG       |
| <b>letS-XbaI-Rv</b>    | letS Cloning   | XbaI                     | TAATCTAGATGGTTTTTCATACAAGAGATTTTTTATGGCC |
